# Supplementary material for: Synthesis, Characterization and DFT Study of a New Family of High-Energy Compounds Based on s-Triazine, Carborane and Tetrazoles
Source: MDPI journal article supplement (doi:10.3390/molecules27217484), 2022-11-02

## checkCIF/PLATON report

Structure factors have been supplied for datablock(s) aa\_sq

THIS REPORT IS FOR GUIDANCE ONLY. IF USED AS PART OF A REVIEW PROCEDURE FOR PUBLICATION, IT SHOULD NOT REPLACE THE EXPERTISE OF AN EXPERIENCED CRYSTALLOGRAPHIC REFEREE.

No syntax errors found.      CIF dictionary      Interpreting this report

### Datablock: aa\_sq

---

Bond precision:      C-C = 0.0076 Å      Wavelength=0.71073

Cell:                  a=14.089(2)                  b=15.442(3)                  c=16.375(3)  
                         alpha=109.645(4)      beta=95.426(4)      gamma=116.641(4)  
Temperature:      120 K

|                        | Calculated                       | Reported                    |
|------------------------|----------------------------------|-----------------------------|
| Volume                 | 2868.9(9)                        | 2868.8(9)                   |
| Space group            | P -1                             | P -1                        |
| Hall group             | -P 1                             | -P 1                        |
| Moiety formula         | C19 H24 B10 N10 O [+<br>solvent] | C19 H24 B10 N10 O, C H2 Cl2 |
| Sum formula            | C19 H24 B10 N10 O [+<br>solvent] | C20 H26 B10 Cl2 N10 O       |
| Mr                     | 516.58                           | 601.51                      |
| Dx, g cm <sup>-3</sup> | 1.196                            | 1.393                       |
| Z                      | 4                                | 4                           |
| Mu (mm <sup>-1</sup> ) | 0.074                            | 0.264                       |
| F000                   | 1064.0                           | 1232.0                      |
| F000'                  | 1064.25                          |                             |
| h, k, lmax             | 17, 19, 20                       | 17, 19, 20                  |
| Nref                   | 11277                            | 11263                       |
| Tmin, Tmax             | 0.924, 0.987                     | 0.847, 0.987                |
| Tmin'                  | 0.912                            |                             |

Correction method= # Reported T Limits: Tmin=0.847 Tmax=0.987  
AbsCorr = MULTI-SCAN

Data completeness= 0.999

Theta(max)= 25.999

R(reflections)= 0.0720( 5302)

wR2(reflections)=  
0.2002( 11263)

S = 0.984

Npar= 721

The following ALERTS were generated. Each ALERT has the format

**test-name\_ALERT\_alert-type\_alert-level.**

Click on the hyperlinks for more details of the test.

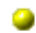

### Alert level C

RINTA01\_ALERT\_3\_C The value of Rint is greater than 0.12

Rint given 0.120

|                   |                                                  |        |              |
|-------------------|--------------------------------------------------|--------|--------------|
| PLAT026_ALERT_3_C | Ratio Observed / Unique Reflections (too) Low .. | 47%    | Check        |
| PLAT213_ALERT_2_C | Atom C10B has ADP max/min Ratio .....            | 3.2    | prolat       |
| PLAT220_ALERT_2_C | NonSolvent Resd 2 C Ueq(max)/Ueq(min) Range      | 4.6    | Ratio        |
| PLAT222_ALERT_3_C | NonSolvent Resd 2 H Uiso(max)/Uiso(min) Range    | 4.1    | Ratio        |
| PLAT234_ALERT_4_C | Large Hirshfeld Difference C9B --C10B .          | 0.17   | Ang.         |
| PLAT241_ALERT_2_C | High 'MainMol' Ueq as Compared to Neighbors of   | C10B   | Check        |
| PLAT340_ALERT_3_C | Low Bond Precision on C-C Bonds .....            | 0.0076 | Ang.         |
| PLAT414_ALERT_2_C | Short Intra D-H..H-X H6AA ..H12C .               | 1.94   | Ang.         |
|                   | x,y,z =                                          | 1_555  | Check        |
| PLAT420_ALERT_2_C | D-H Bond Without Acceptor N1A --H1AA .           |        | Please Check |
| PLAT420_ALERT_2_C | D-H Bond Without Acceptor N6A --H6AA .           |        | Please Check |
| PLAT420_ALERT_2_C | D-H Bond Without Acceptor N1B --H1BA .           |        | Please Check |
| PLAT905_ALERT_3_C | Negative K value in the Analysis of Variance ... | -4.913 | Report       |
| PLAT910_ALERT_3_C | Missing # of FCF Reflection(s) Below Theta(Min). | 7      | Note         |
| PLAT911_ALERT_3_C | Missing FCF Refl Between Thmin & STh/L= 0.600    | 8      | Report       |

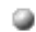

### Alert level G

FORMU01\_ALERT\_2\_G There is a discrepancy between the atom counts in the

\_chemical\_formula\_sum and the formula from the \_atom\_site\* data.

Atom count from \_chemical\_formula\_sum: C20 H26 B10 Cl2 N10 O1

Atom count from the \_atom\_site data: C19 H24 B10 N10 O1

CELLZ01\_ALERT\_1\_G Difference between formula and atom\_site contents detected.

CELLZ01\_ALERT\_1\_G ALERT: Large difference may be due to a

symmetry error - see SYMMG tests

From the CIF: \_cell\_formula\_units\_Z 4

From the CIF: \_chemical\_formula\_sum C20 H26 B10 Cl2 N10 O

TEST: Compare cell contents of formula and atom\_site data

| atom | Z*formula | cif sites | diff |
|------|-----------|-----------|------|
| C    | 80.00     | 76.00     | 4.00 |
| H    | 104.00    | 96.00     | 8.00 |
| B    | 40.00     | 40.00     | 0.00 |
| Cl   | 8.00      | 0.00      | 8.00 |
| N    | 40.00     | 40.00     | 0.00 |
| O    | 4.00      | 4.00      | 0.00 |

|                   |                                                  |       |              |
|-------------------|--------------------------------------------------|-------|--------------|
| PLAT007_ALERT_5_G | Number of Unrefined Donor-H Atoms .....          | 6     | Report       |
| PLAT041_ALERT_1_G | Calc. and Reported SumFormula Strings Differ     |       | Please Check |
| PLAT051_ALERT_1_G | Mu(calc) and Mu(CIF) Ratio Differs from 1.0 by . | 72.11 | %            |
| PLAT154_ALERT_1_G | The s.u.'s on the Cell Angles are Equal ..(Note) | 0.004 | Degree       |
| PLAT343_ALERT_2_G | Unusual sp? Angle Range in Main Residue for      | C1A   | Check        |
| PLAT343_ALERT_2_G | Unusual sp? Angle Range in Main Residue for      | C2A   | Check        |
| PLAT343_ALERT_2_G | Unusual sp? Angle Range in Main Residue for      | C1B   | Check        |

|                                                                    |                                 |             |
|--------------------------------------------------------------------|---------------------------------|-------------|
| PLAT343_ALERT_2_G Unusual sp?                                      | Angle Range in Main Residue for | C2B Check   |
| PLAT367_ALERT_2_G Long?                                            | C(sp?)-C(sp?) Bond C1A - C2A .  | 1.64 Ang.   |
| PLAT367_ALERT_2_G Long?                                            | C(sp?)-C(sp?) Bond C1B - C2B .  | 1.63 Ang.   |
| PLAT606_ALERT_4_G Solvent Accessible VOID(S) in Structure .....    |                                 | ! Info      |
| PLAT720_ALERT_4_G Number of Unusual/Non-Standard Labels .....      |                                 | 10 Note     |
| PLAT869_ALERT_4_G ALERTS Related to the Use of SQUEEZE Suppressed  |                                 | ! Info      |
| PLAT933_ALERT_2_G Number of HKL-OMIT Records in Embedded .res File |                                 | 12 Note     |
| PLAT941_ALERT_3_G Average HKL Measurement Multiplicity .....       |                                 | 2.5 Low     |
| PLAT960_ALERT_3_G Number of Intensities with I < - 2*sig(I) ...    |                                 | 8 Check     |
| PLAT967_ALERT_5_G Note: Two-Theta Cutoff Value in Embedded .res .. |                                 | 52.0 Degree |
| PLAT978_ALERT_2_G Number C-C Bonds with Positive Residual Density. |                                 | 0 Info      |

---

0 **ALERT level A** = Most likely a serious problem - resolve or explain  
 0 **ALERT level B** = A potentially serious problem, consider carefully  
 15 **ALERT level C** = Check. Ensure it is not caused by an omission or oversight  
 21 **ALERT level G** = General information/check it is not something unexpected

5 ALERT type 1 CIF construction/syntax error, inconsistent or missing data  
 16 ALERT type 2 Indicator that the structure model may be wrong or deficient  
 9 ALERT type 3 Indicator that the structure quality may be low  
 4 ALERT type 4 Improvement, methodology, query or suggestion  
 2 ALERT type 5 Informative message, check

---

It is advisable to attempt to resolve as many as possible of the alerts in all categories. Often the minor alerts point to easily fixed oversights, errors and omissions in your CIF or refinement strategy, so attention to these fine details can be worthwhile. In order to resolve some of the more serious problems it may be necessary to carry out additional measurements or structure refinements. However, the purpose of your study may justify the reported deviations and the more serious of these should normally be commented upon in the discussion or experimental section of a paper or in the "special\_details" fields of the CIF. checkCIF was carefully designed to identify outliers and unusual parameters, but every test has its limitations and alerts that are not important in a particular case may appear. Conversely, the absence of alerts does not guarantee there are no aspects of the results needing attention. It is up to the individual to critically assess their own results and, if necessary, seek expert advice.

### Publication of your CIF in IUCr journals

A basic structural check has been run on your CIF. These basic checks will be run on all CIFs submitted for publication in IUCr journals (*Acta Crystallographica*, *Journal of Applied Crystallography*, *Journal of Synchrotron Radiation*); however, if you intend to submit to *Acta Crystallographica Section C* or *E* or *IUCrData*, you should make sure that full publication checks are run on the final version of your CIF prior to submission.

### Publication of your CIF in other journals

Please refer to the *Notes for Authors* of the relevant journal for any special instructions relating to CIF submission.

PLATON version of 18/05/2022; check.def file version of 17/05/2022

Datablock aa\_sq - ellipsoid plot

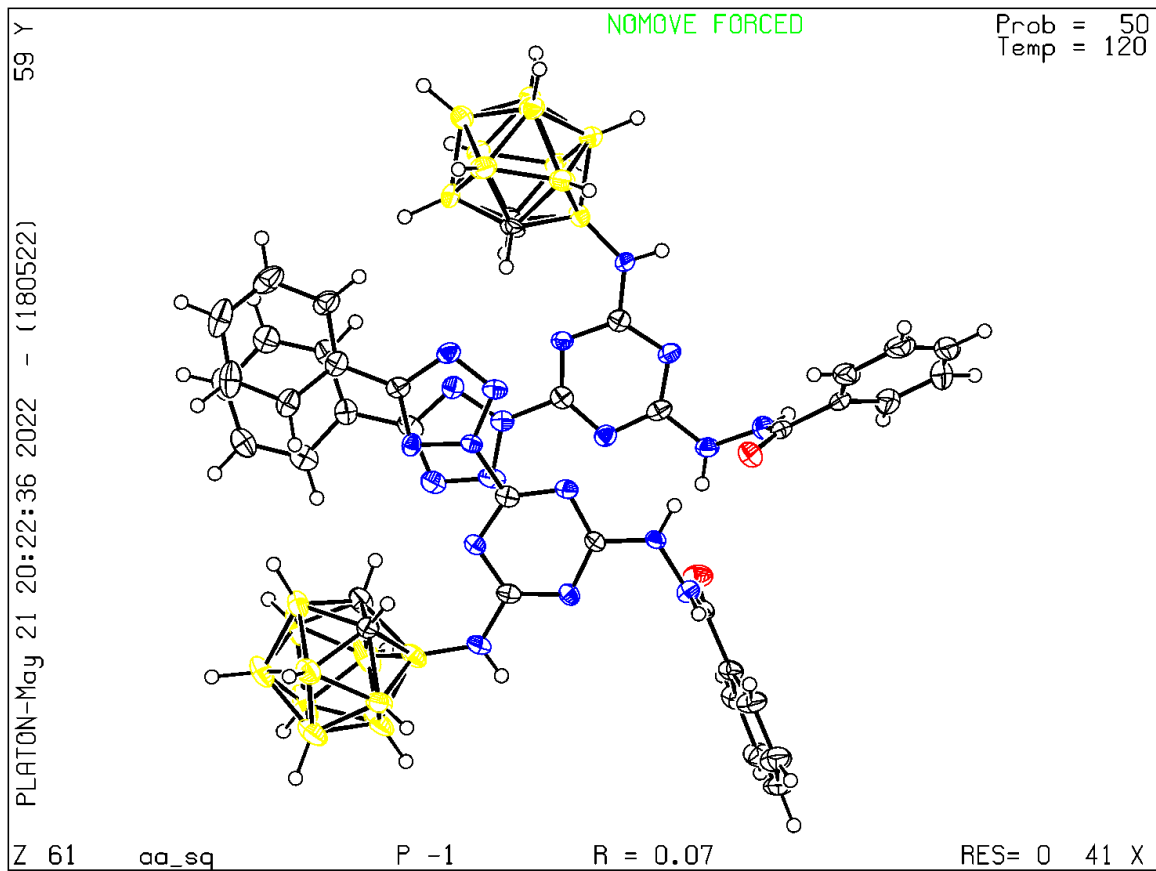

Supplement: s1 [file s1]
