# Supplementary material for: Synthesis, Characterization and DFT Study of a New Family of High-Energy Compounds Based on s-Triazine, Carborane and Tetrazoles
Source: MDPI journal article supplement (doi:10.3390/molecules27217484), 2022-11-02
Supplement: s1 [file s1]

## Supplementary Materials

# Synthesis, Characterization and DFT Study of a New Family of High Energy Compounds Based on *s*-Triazine, Carborane and Tetrazoles

Anton V. Makarenkov <sup>1</sup>, Sergey S. Kiselev <sup>1</sup>, Elena G. Kononova <sup>1</sup>, Fedor M. Dolgushin <sup>2</sup>, Alexander S. Peregudov <sup>1</sup>, Yurii A. Borisov <sup>1</sup>, Valentina A. Ol'shevskaya <sup>1,\*</sup>

<sup>1</sup> A.N.Nesmeyanov Institute of Organoelement Compounds, Russian Academy of Sciences, 28, bld. 1 Vavilova street, 119334 Moscow, Russian

<sup>2</sup> N. S. Kurnakov Institute of General and Inorganic Chemistry, Russian Academy of Sciences, 31 Leninsky Prosp., 119071 Moscow, Russian

\* Correspondence: olshevsk@ineos.ac.ru

## Recommendation

All the prepared compounds are stable during the preparation and isolation but they are rather sensitive to the open fire.

## Table of contents

|                                                                                             |       |
|---------------------------------------------------------------------------------------------|-------|
| 1. NMR spectra                                                                              |       |
| 1.1. NMR spectra of compounds <b>9-11</b>                                                   | 2-8   |
| 1.2. NMR spectra of compounds <b>19-20</b>                                                  | 9-10  |
| 1.3 NMR spectra of compounds <b>15-17</b>                                                   | 11-13 |
| 2. X-ray crystallographic data of compounds <b>9, 10, 19, 20</b>                            | 14-20 |
| 3. Hirshfeld surface analysis of compounds <b>9, 10, 19, 20</b>                             | 20-26 |
| 4. Calculated geometry and electronic structure for compounds <b>9-11, 15-17, 19 and 25</b> | 27-30 |
| 5. Reference                                                                                | 30    |

**NMR spectra of compounds 9-11, 19, 20.**

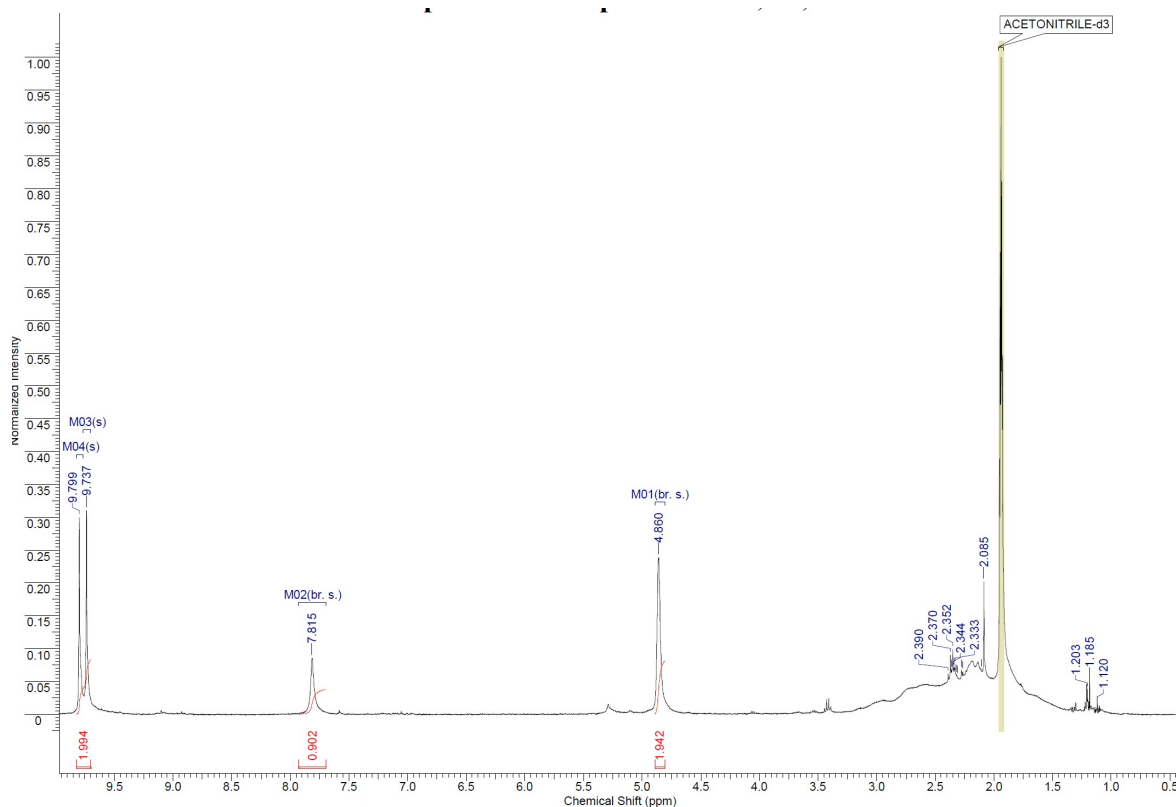

**Figure S1.**  $^1\text{H}$  NMR spectra of compound **9** in acetonitrile- $\text{D}_3$

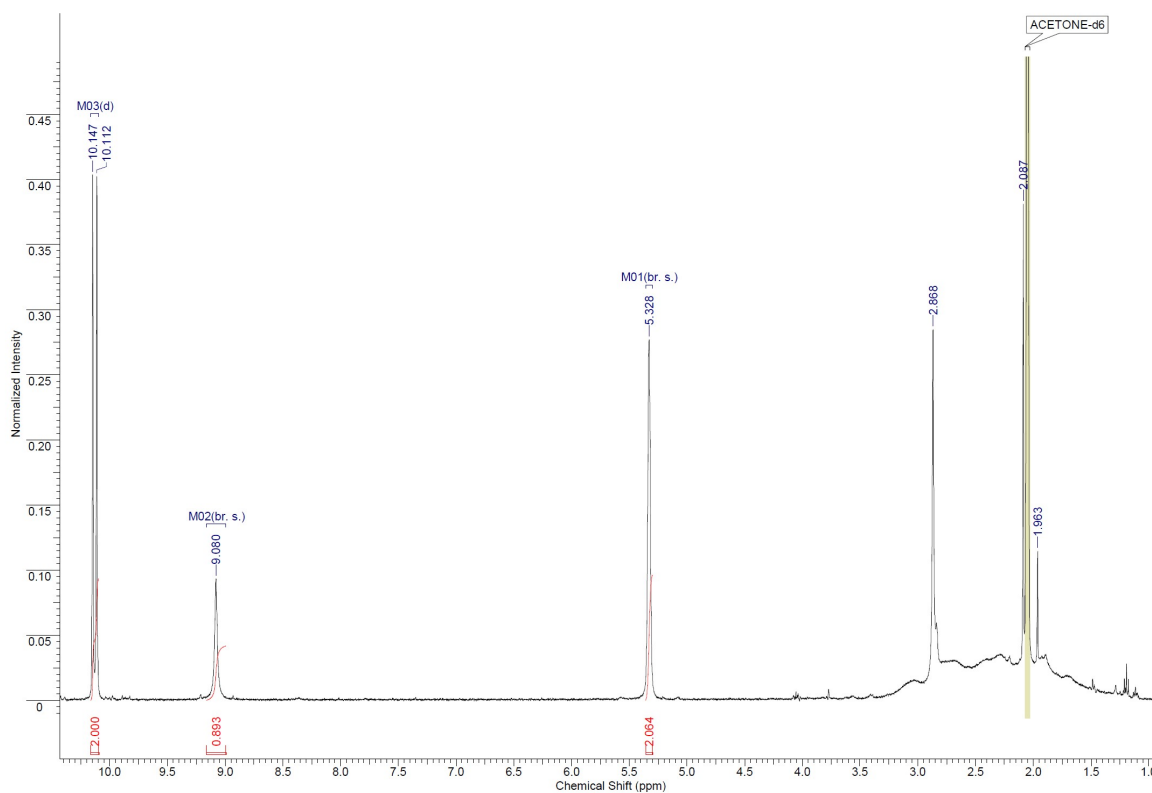

**Figure S2.**  $^1\text{H}$  NMR spectra of compound **9** in acetone- $\text{D}_6$ . The signal at  $\delta = 2.88$  ppm belong to water protons.

After heating of the sample in the ampoule, a significant decrease in the integral intensity of the signal of NH proton was observed, apparently associated with the exchange processes between compound **9**, acetone and acetone- $\text{D}_6$  (Figure S3 and Figure S4).

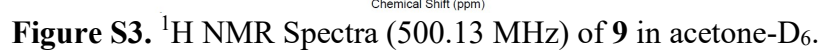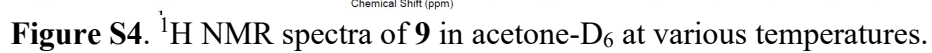

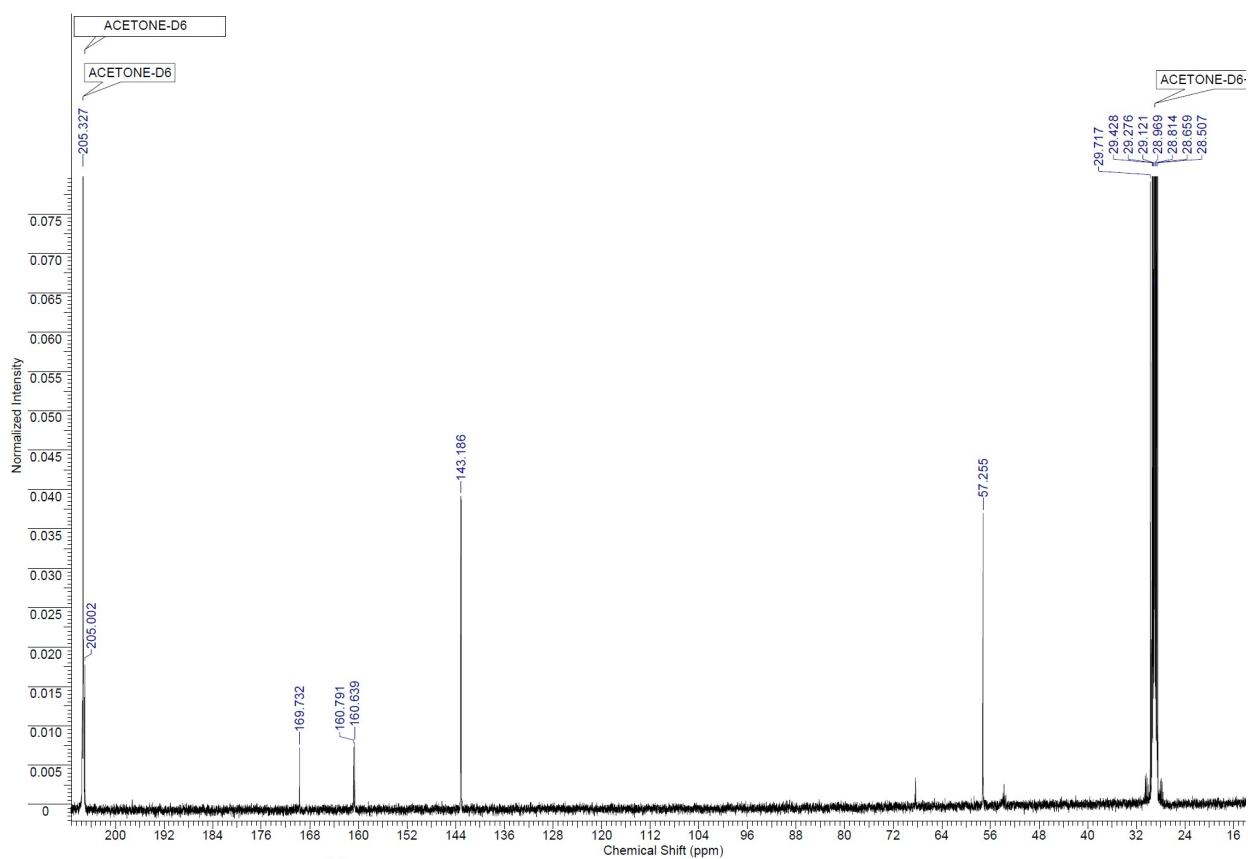

**Figure S5.** <sup>13</sup>C NMR Spectra (125.76 MHz) of compound **9** in acetone-D<sub>6</sub>.

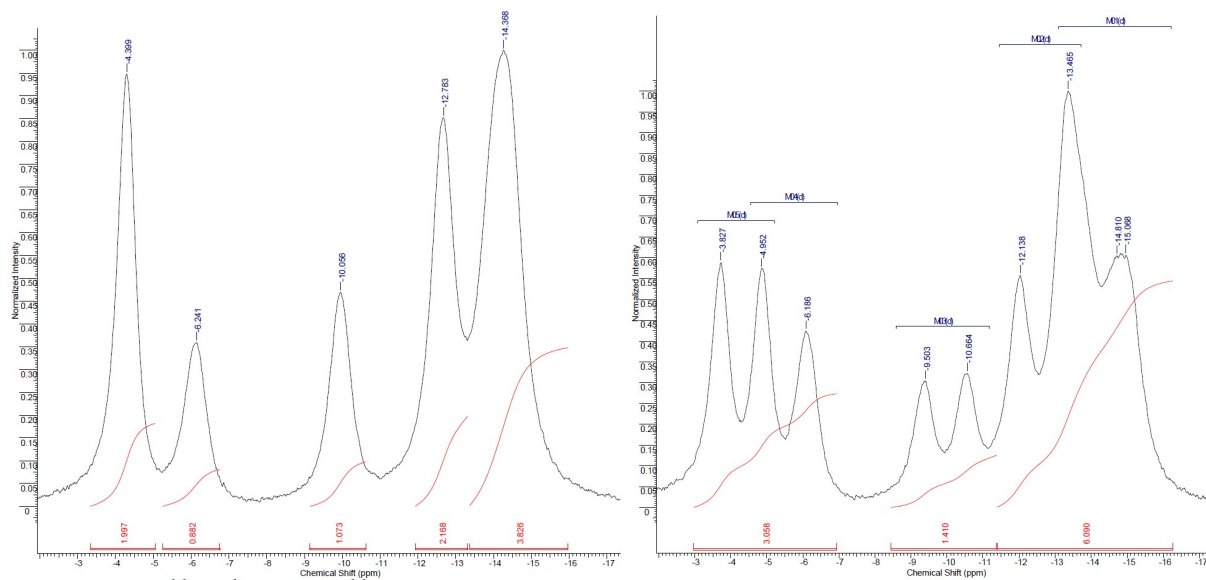

**Figure S6.** <sup>11</sup>B{<sup>1</sup>H} and <sup>11</sup>B NMR spectra of compound **9** in acetone-D<sub>6</sub>



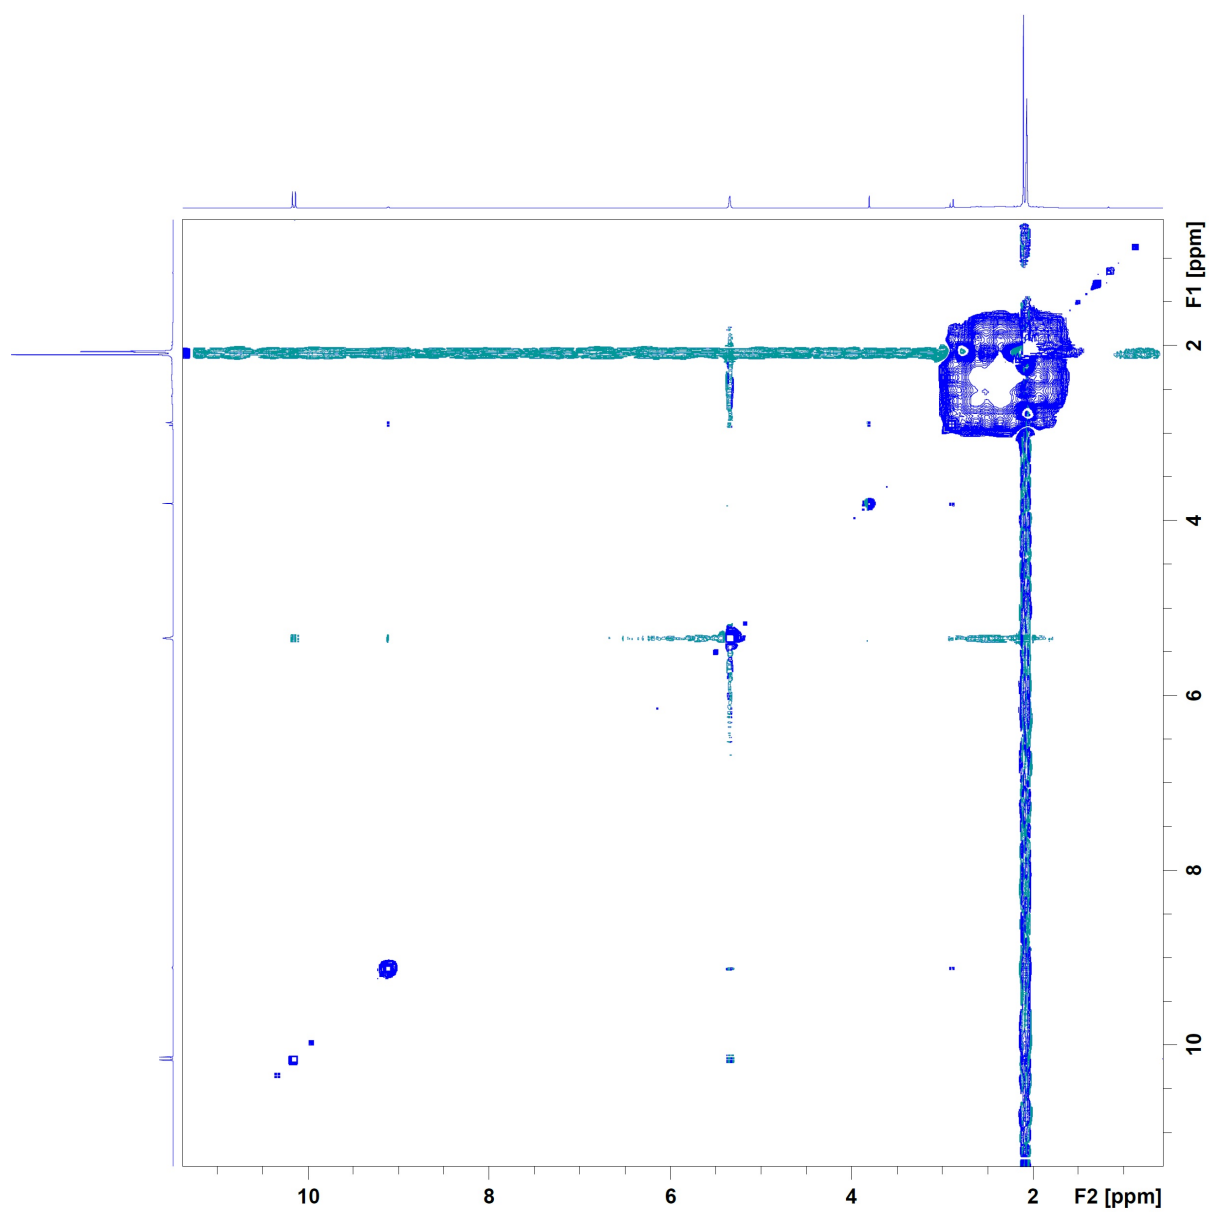

**Figure S7.** NOESY spectra of compound **9**.

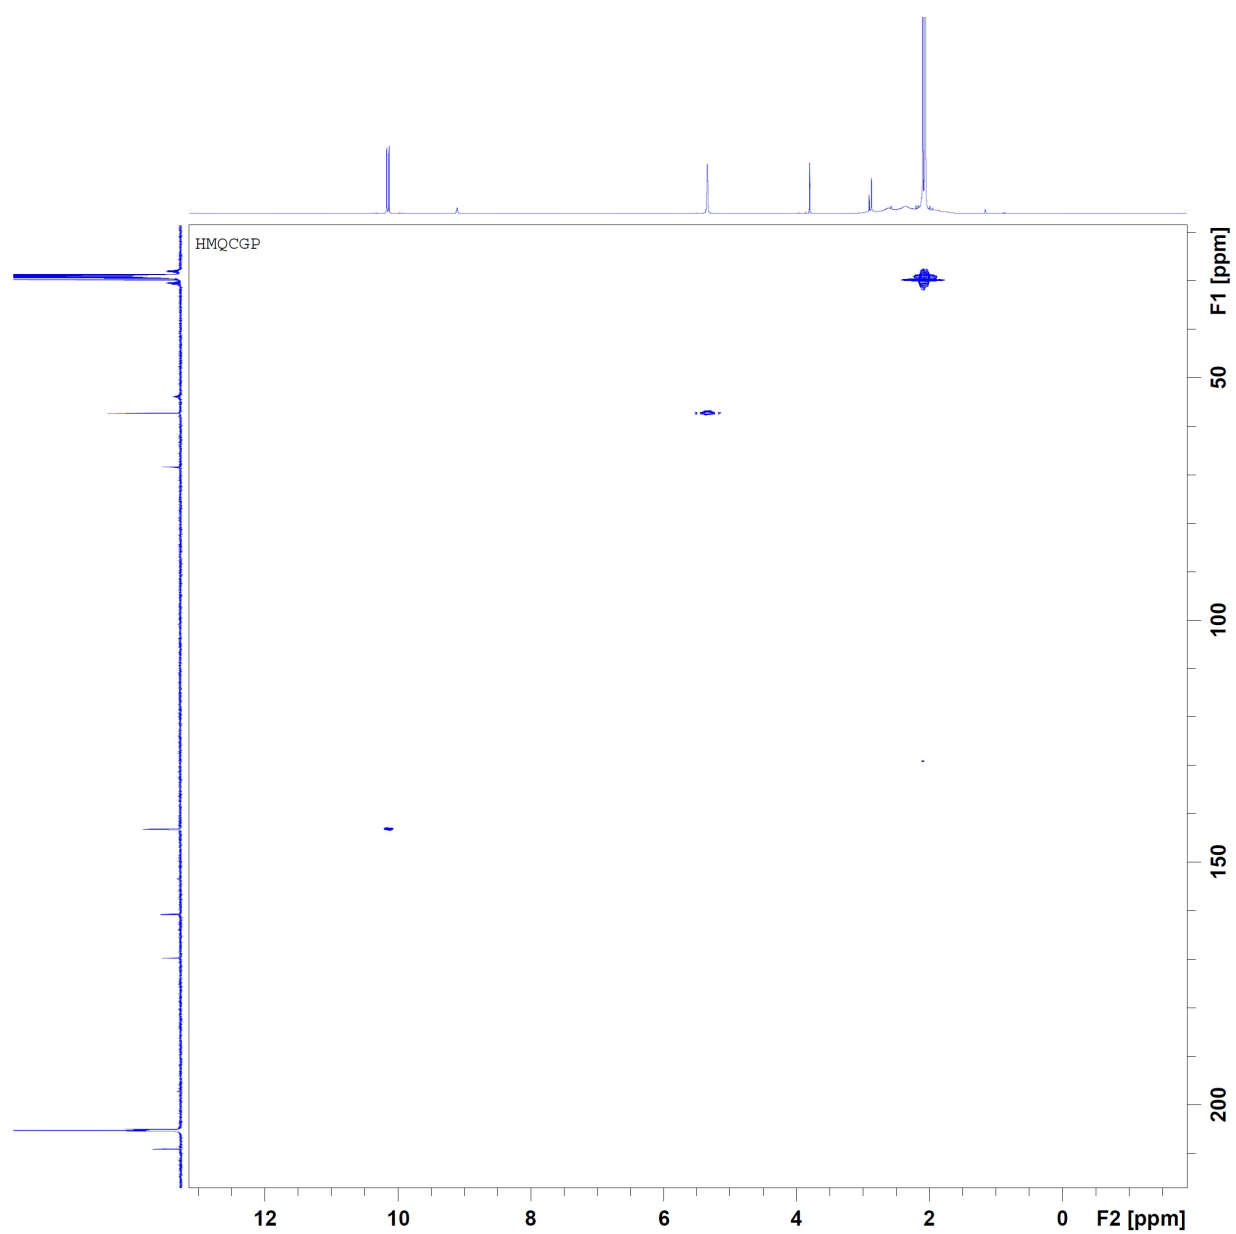

**Figure S8.** HMBC spectra of compound **9**.

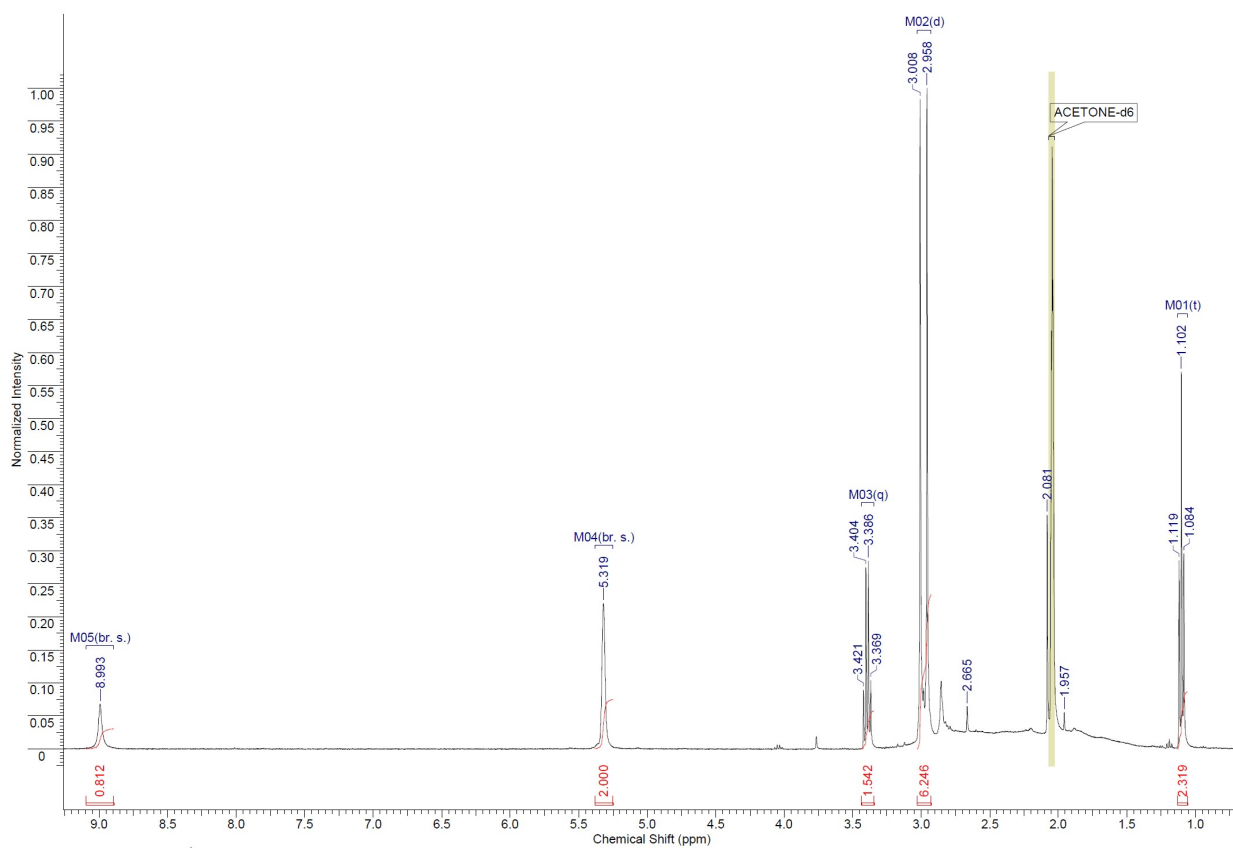

**Figure S9.**  $^1\text{H}$  NMR spectra of compound **10** in acetone- $\text{D}_6$ . Signals at  $\delta = 1.02$  ppm and  $\delta = 3.39$  ppm attributed to the protons of EtOAc.

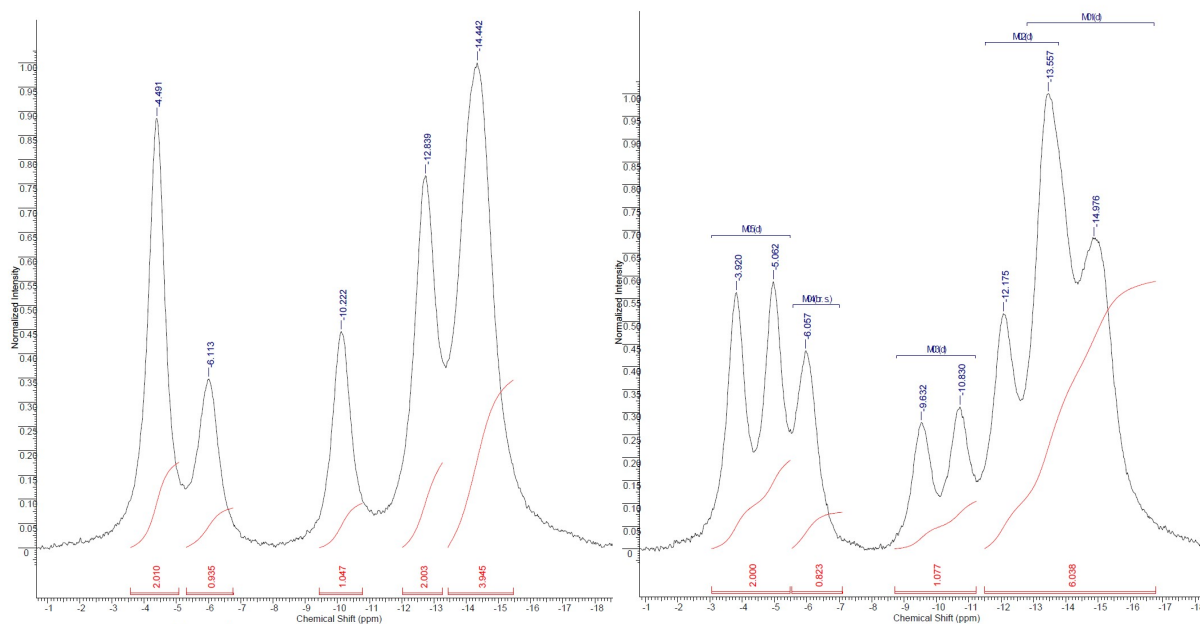

**Figure S10.**  $^{11}\text{B}\{^1\text{H}\}$  and  $^{11}\text{B}$  NMR Spectra of compound **10** in acetone- $\text{D}_6$ .

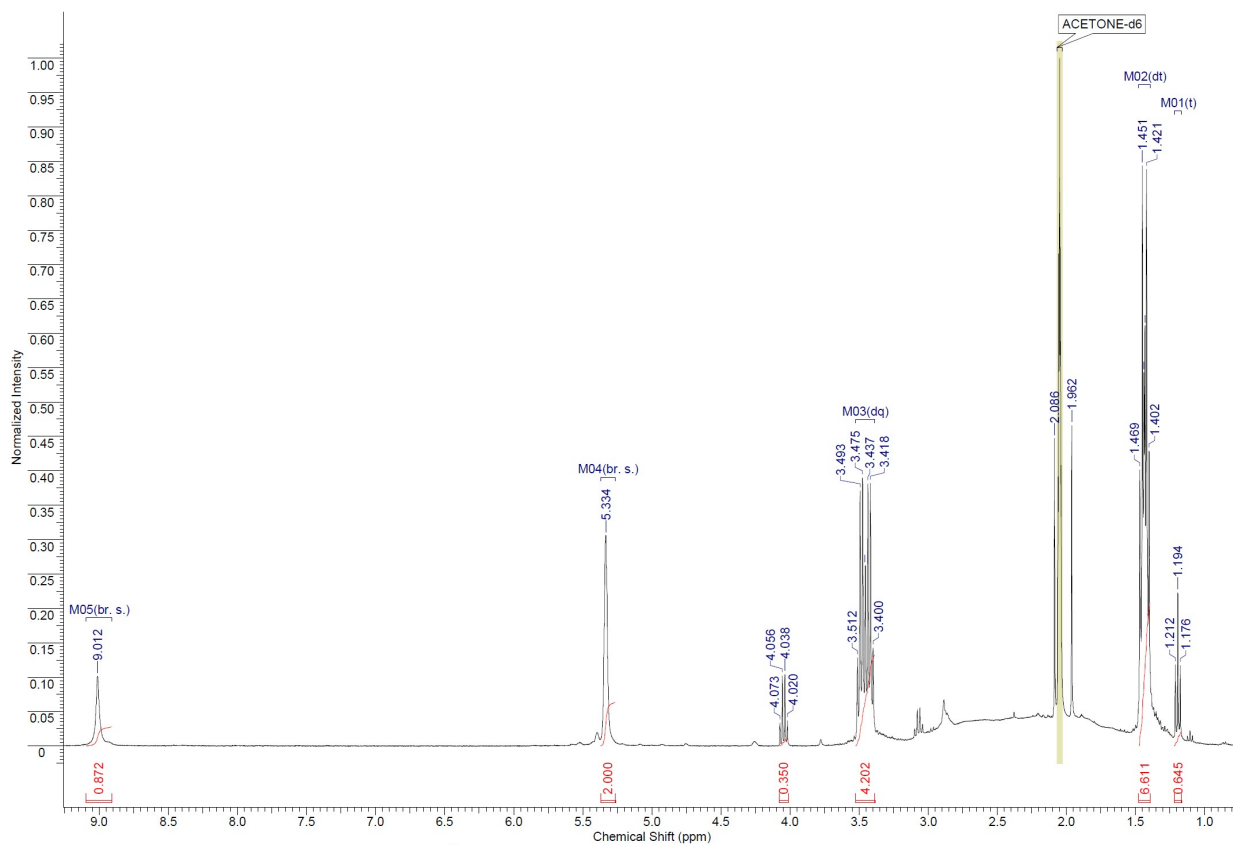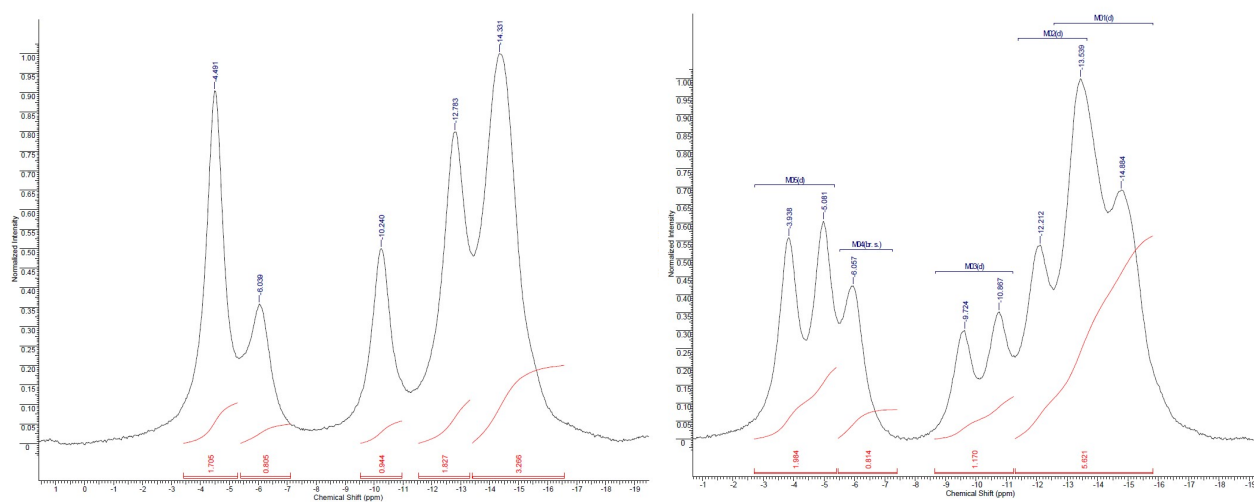

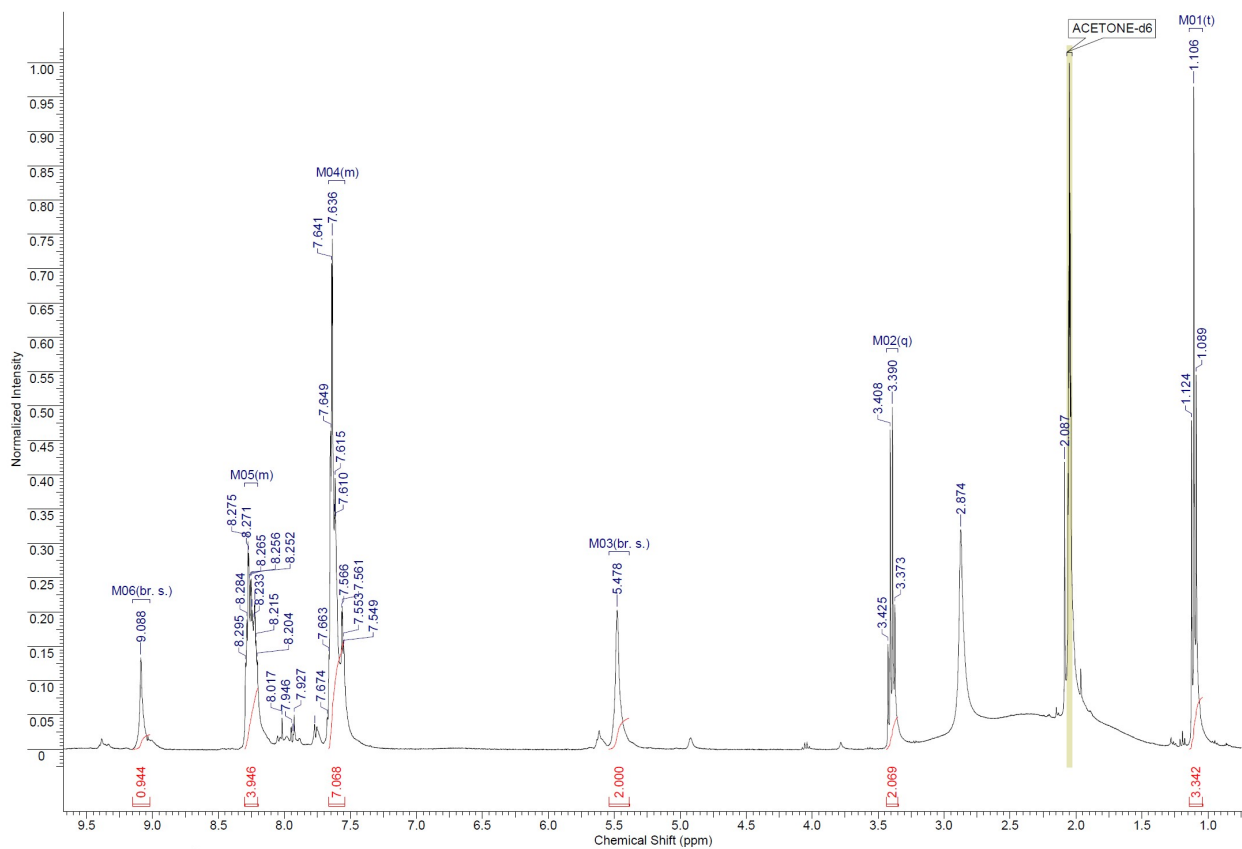

**Figure S13.**  $^1\text{H}$  NMR spectra of compound **19** in acetone- $\text{D}_6$ . Signals at  $\delta = 1.02$  ppm and  $\delta = 3.39$  ppm attributed to the protons of EtOAc which formed the stable complex (1:1) with compound **19**.

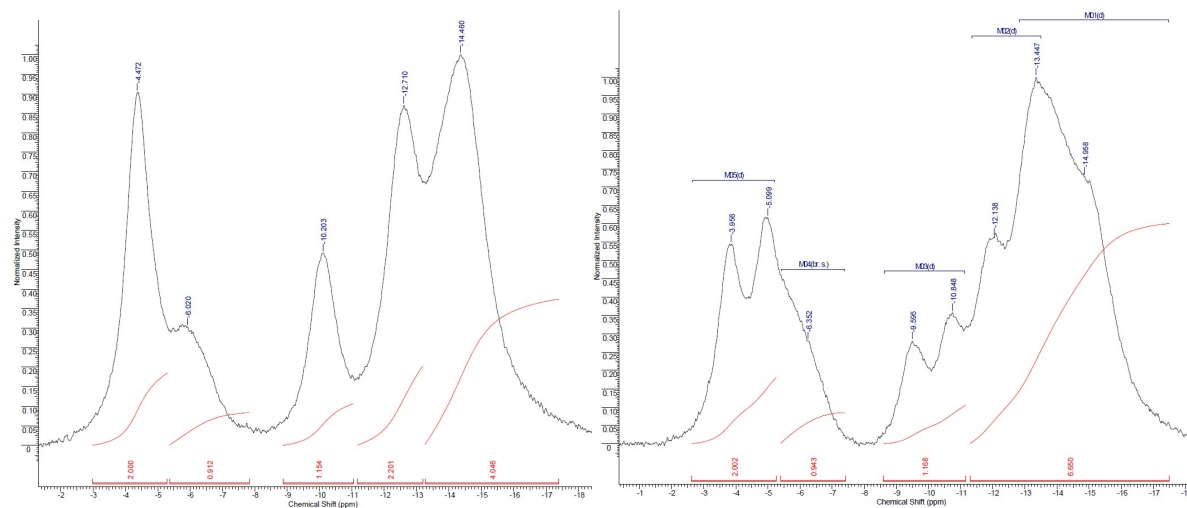

**Figure S14.**  $^{11}\text{B}\{^1\text{H}\}$  and  $^{11}\text{B}$  NMR spectra of compound **19** in acetone- $\text{D}_6$ .

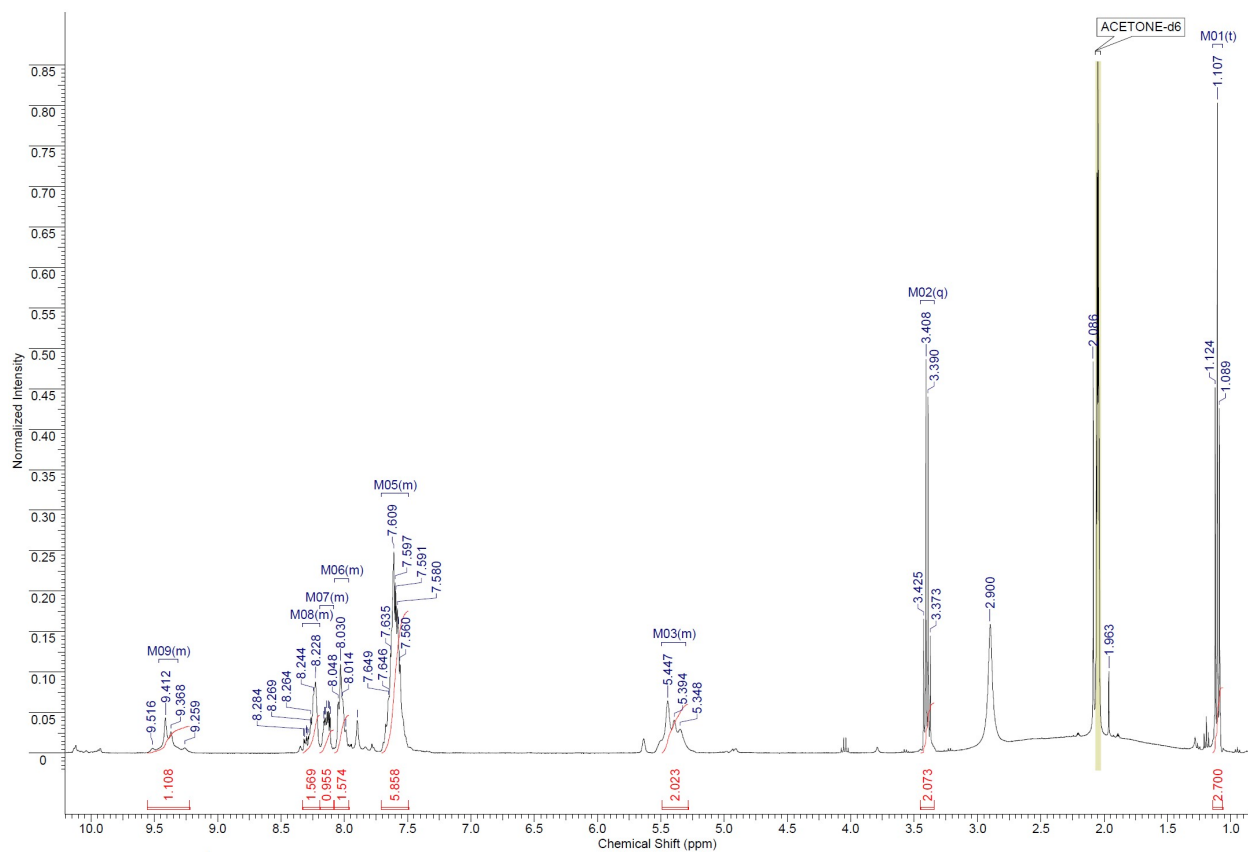

**Figure S15.**  $^1\text{H}$  NMR spectra of **20** in acetone- $\text{D}_6$ . Signals at  $\delta = 1.02$  ppm and  $\delta = 3.39$  ppm belong to the protons of EtOAc which forms a stable 1:1 complex with this compound.

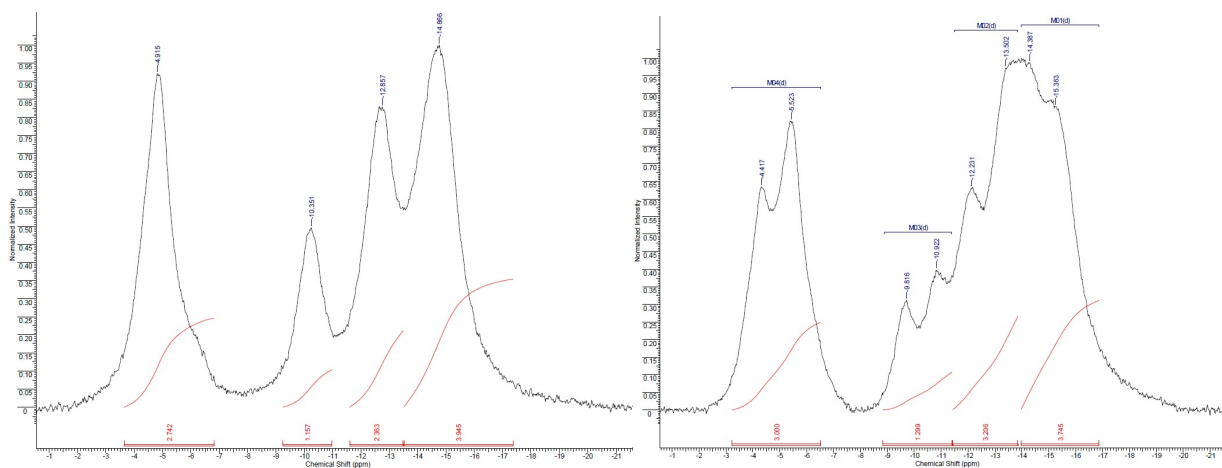

**Figure S16.**  $^{11}\text{B}\{^1\text{H}\}$  and  $^{11}\text{B}$  NMR spectra of compound **20** in acetone- $\text{D}_6$ .

NMR spectra of compounds **15-17**.

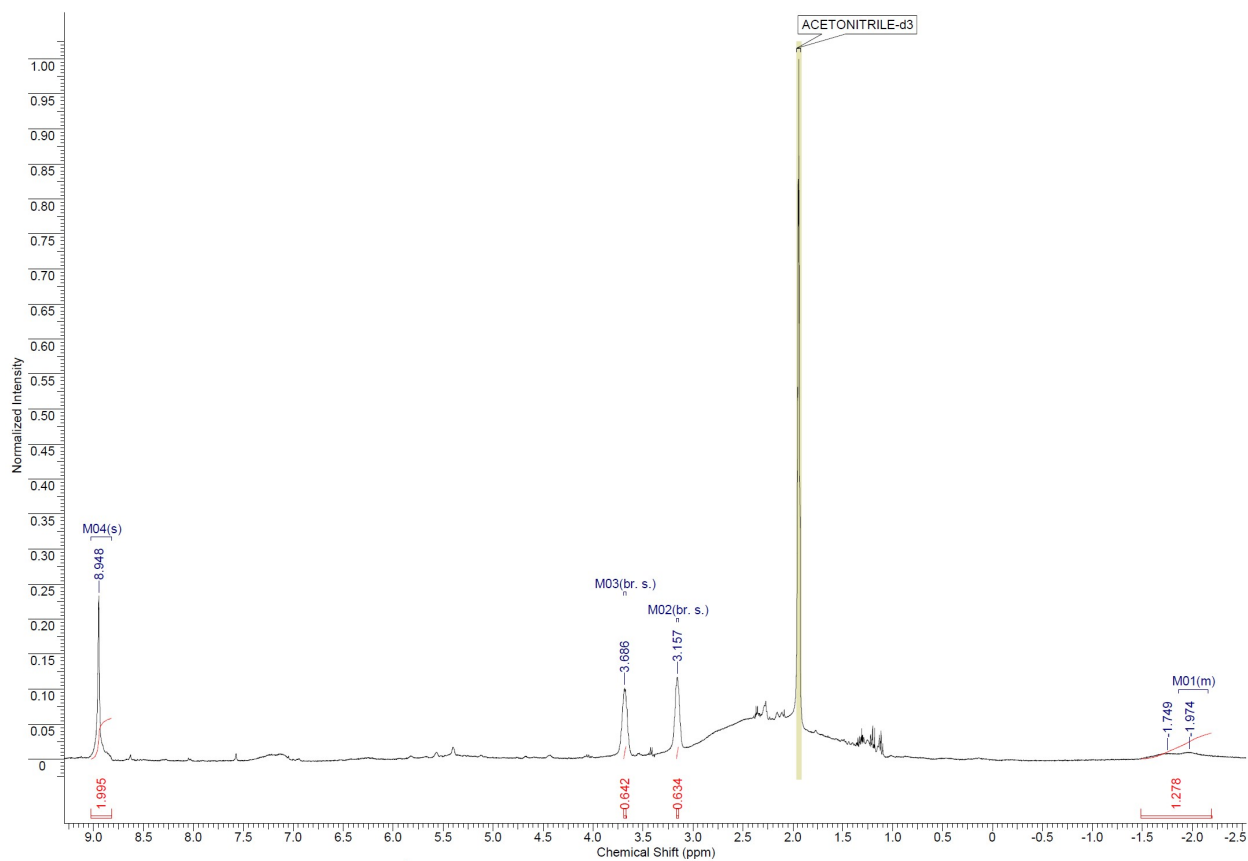

Figure S17.  $^1\text{H}$  NMR spectra of compound **15** in acetone- $\text{D}_6$ .

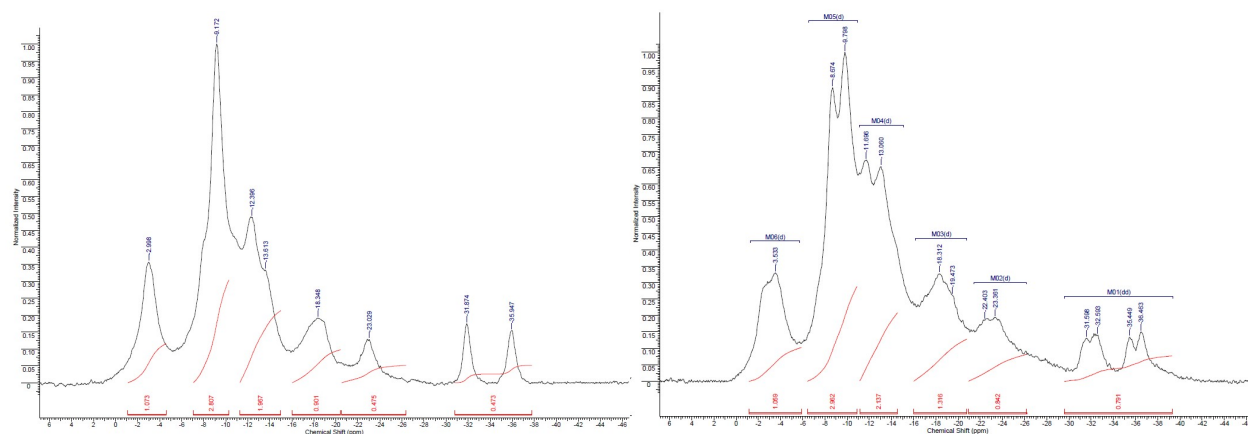

Figure S18.  $^{11}\text{B}\{^1\text{H}\}$  and  $^{11}\text{B}$  NMR spectra of compound **15** in acetone- $\text{D}_6$ .

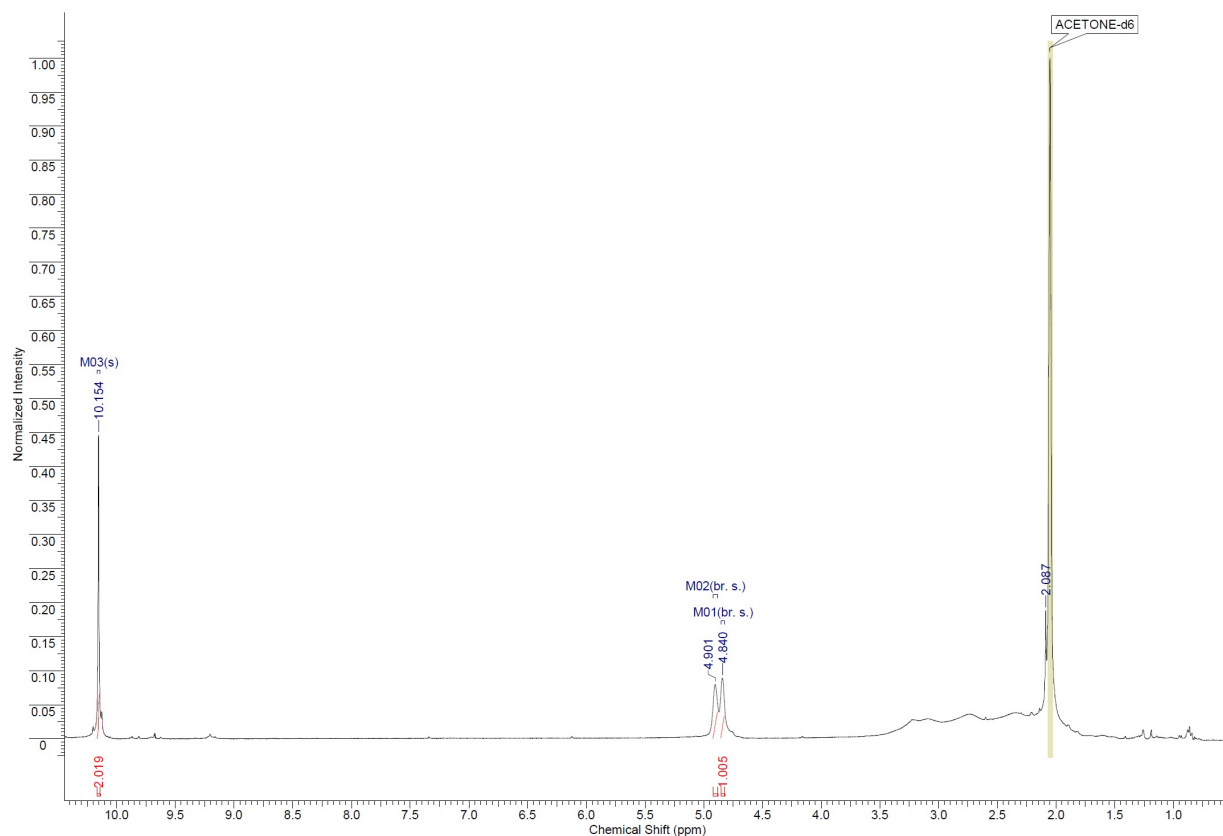

Figure S19.  $^1\text{H}$  NMR spectra of compound **16** in acetone- $\text{D}_6$ .

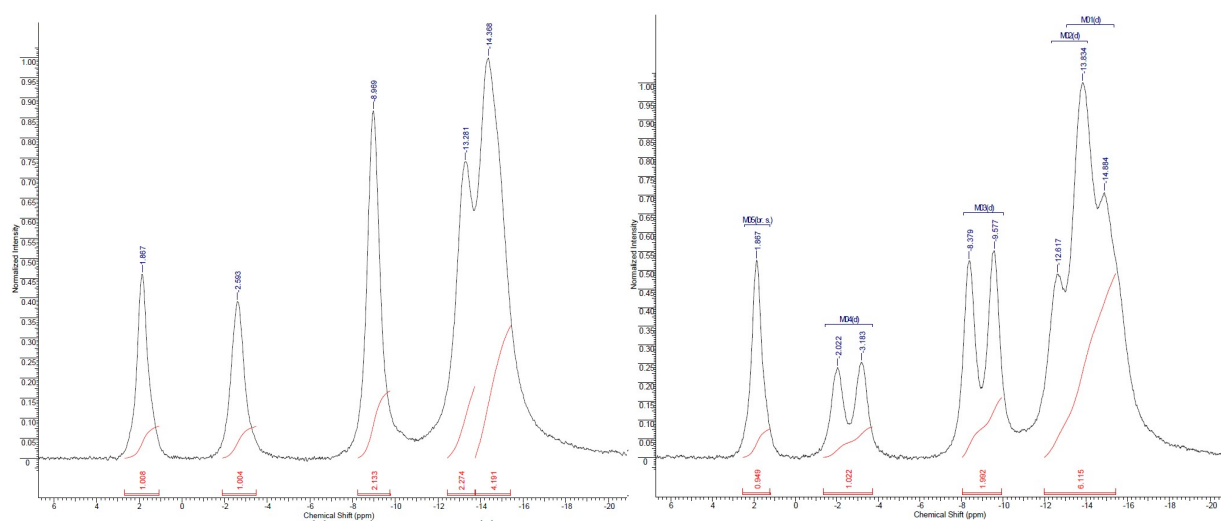

Figure S20.  $^{11}\text{B}\{^1\text{H}\}$  and  $^{11}\text{B}$  NMR spectra of compound **16** in acetone- $\text{D}_6$ .



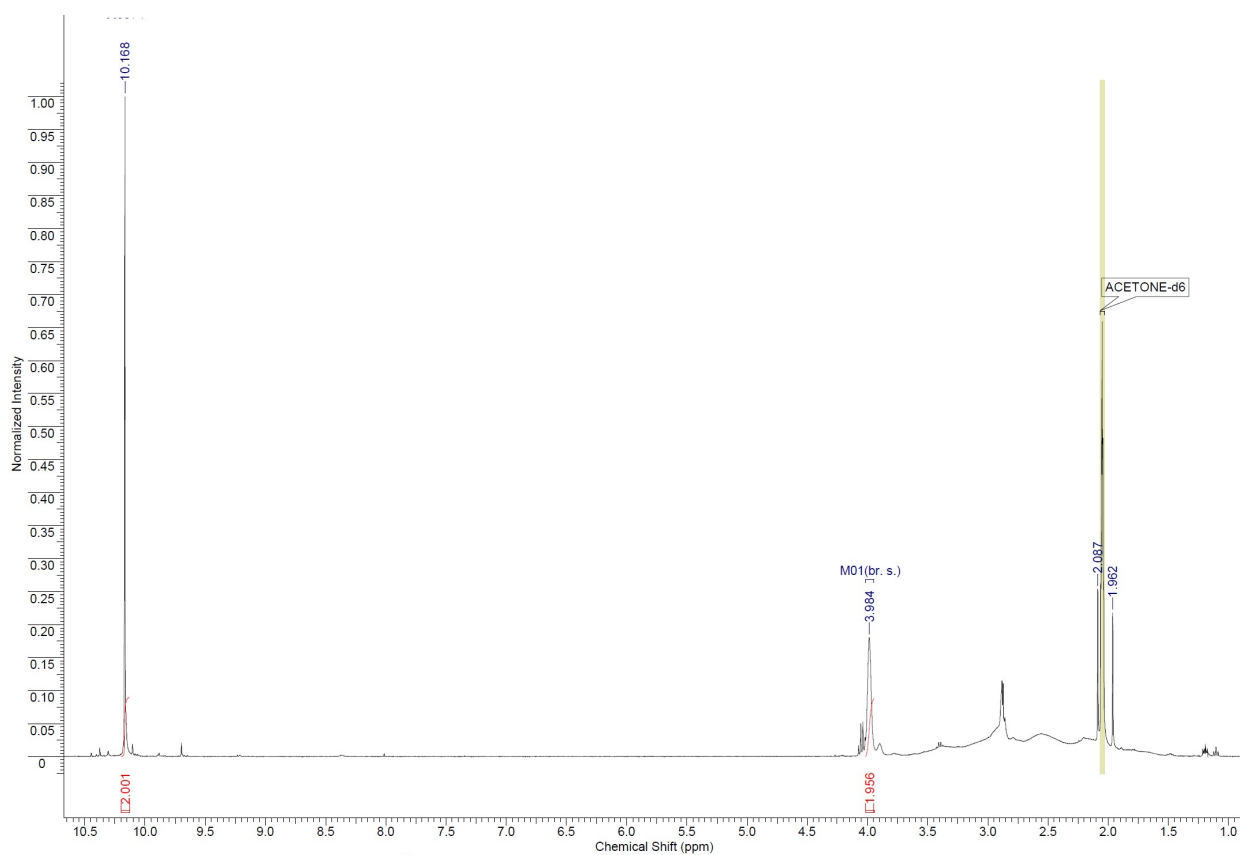

**Figure S21.**  $^1\text{H}$  NMR spectra of compound **17** in acetone- $\text{D}_6$ .

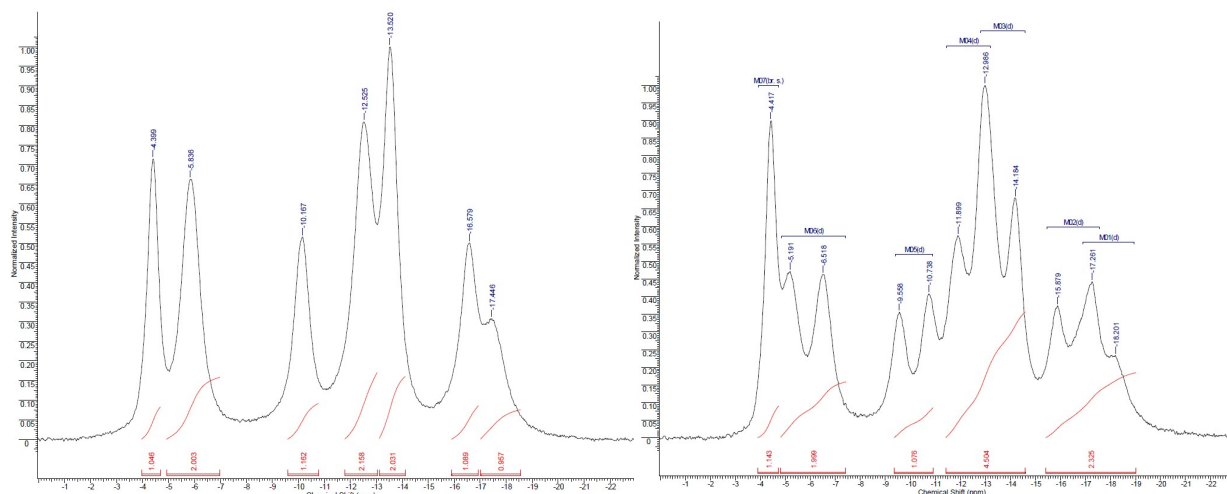

**Figure S22.**  $^{11}\text{B}\{^1\text{H}\}$  and  $^{11}\text{B}$  NMR spectra of compound **17** in acetone- $\text{D}_6$ .

## X-ray crystallography

**Table S1.** X-ray data for compound **9**.

|                    |            |                    |            |
|--------------------|------------|--------------------|------------|
| B(3)-N(1)          | 1.4717(15) | N(1)-C(13)-N(2)    | 119.41(10) |
| C(13)-N(1)         | 1.3315(14) | N(1)-C(13)-N(4)    | 116.99(10) |
| C(13)-N(2)         | 1.3625(14) | N(2)-C(13)-N(4)    | 123.59(10) |
| C(13)-N(4)         | 1.3646(14) | N(2)-C(14)-N(3)    | 129.17(10) |
| C(14)-N(2)         | 1.3142(14) | N(2)-C(14)-N(5)    | 117.16(10) |
| C(14)-N(3)         | 1.3372(14) | N(3)-C(14)-N(5)    | 113.65(10) |
| C(14)-N(5)         | 1.4143(14) | N(4)-C(15)-N(3)    | 129.47(10) |
| C(15)-N(4)         | 1.3119(14) | N(4)-C(15)-N(9)    | 115.03(10) |
| C(15)-N(3)         | 1.3299(14) | N(3)-C(15)-N(9)    | 115.48(10) |
| C(15)-N(9)         | 1.4214(14) | N(8)-C(16)-N(5)    | 108.39(11) |
| C(16)-N(8)         | 1.3117(16) | C(13)-N(1)-B(3)    | 129.41(10) |
| C(16)-N(5)         | 1.3549(15) | C(14)-N(2)-C(13)   | 113.57(10) |
| C(16)-H(16)        | 0.930(15)  | C(15)-N(3)-C(14)   | 110.54(10) |
| N(1)-H(1N)         | 0.867(16)  | C(15)-N(4)-C(13)   | 113.54(9)  |
| N(5)-N(6)          | 1.3622(13) | C(16)-N(5)-N(6)    | 108.69(9)  |
| N(6)-N(7)          | 1.2890(14) | C(16)-N(5)-C(14)   | 128.67(10) |
| N(7)-N(8)          | 1.3815(15) | N(6)-N(5)-C(14)    | 122.64(9)  |
| N(9)-C(17)/N(10')  | 1.3531(14) | N(7)-N(6)-N(5)     | 105.82(9)  |
| N(9)-N(10)/C(17')  | 1.3531(14) | N(6)-N(7)-N(8)     | 111.32(9)  |
| N(11)-N(10)/C(17') | 1.2997(15) | C(16)-N(8)-N(7)    | 105.79(10) |
| N(12)-C(17)/N(10') | 1.2974(14) | C(17)-N(9)-N(10)   | 108.45(9)  |
| N(11)-N(12)        | 1.3777(15) | N(10')-N(9)-C(17') | 108.45(9)  |
| C(17)-H(17B)       | 0.9500     | N(10')-N(9)-C(15)  | 124.71(10) |
| C(17')-H(17A)      | 0.9500     | C(17)-N(9)-C(15)   | 124.71(10) |
|                    |            | N(10)-N(9)-C(15)   | 126.75(10) |
|                    |            | C(17')-N(9)-C(15)  | 126.75(10) |
|                    |            | N(11)-N(10)-N(9)   | 107.51(10) |
|                    |            | N(11)-C(17')-N(9)  | 107.51(10) |
|                    |            | C(17')-N(11)-N(12) | 108.12(10) |
|                    |            | N(10)-N(11)-N(12)  | 108.12(10) |
|                    |            | N(10')-N(12)-N(11) | 108.60(10) |
|                    |            | C(17)-N(12)-N(11)  | 108.60(10) |
|                    |            | N(12)-C(17)-N(9)   | 107.32(10) |
|                    |            | N(12)-N(10')-N(9)  | 107.32(10) |

**Table S2.** X-ray data for compound **10**.

|            |            |             |            |
|------------|------------|-------------|------------|
| C(1)-C(2)  | 1.6448(18) | N(5)-C(14)  | 1.4179(16) |
| B(3)-N(1)  | 1.4742(17) | N(6)-N(7)   | 1.2838(15) |
| N(1)-C(13) | 1.3359(16) | N(7)-N(8)   | 1.3768(16) |
| N(2)-C(14) | 1.3129(16) | N(8)-C(16)  | 1.3123(17) |
| N(2)-C(13) | 1.3547(16) | N(9)-C(17)  | 1.3642(16) |
| N(3)-C(14) | 1.3283(16) | N(9)-N(10)  | 1.3765(14) |
| N(3)-C(15) | 1.3308(16) | N(9)-C(15)  | 1.4156(15) |
| N(4)-C(15) | 1.3151(16) | N(10)-N(11) | 1.2810(15) |
| N(4)-C(13) | 1.3619(15) | N(11)-N(12) | 1.3798(16) |
| N(5)-C(16) | 1.3659(16) | N(12)-C(17) | 1.3120(17) |
| N(5)-N(6)  | 1.3722(14) |             |            |

**Table S3.** X-ray data for compound **19**.

|                 |          |                  |          |
|-----------------|----------|------------------|----------|
| N(1)-C(3)       | 1.338(3) | N(4)-C(3)        | 1.315(3) |
| N(1)-B(3)       | 1.471(4) | N(4)-C(5)        | 1.360(3) |
| N(1)-H(1N)      | 0.80(4)  | N(5)-C(6)        | 1.328(4) |
| N(2)-C(4)       | 1.361(3) | N(6)-C(4)        | 1.305(3) |
| N(2)-N(5)       | 1.377(3) | N(6)-C(6)        | 1.388(4) |
| N(2)-C(3)       | 1.397(3) | N(7)-C(5)        | 1.320(3) |
| N(3)-C(4)       | 1.380(3) | N(7)-N(8)        | 1.397(3) |
| N(3)-C(13)      | 1.396(3) | N(8)-C(13)       | 1.315(4) |
| N(3)-C(5)       | 1.397(3) |                  |          |
|                 |          |                  |          |
| C(3)-N(1)-B(3)  | 126.3(2) | N(4)-C(3)-N(1)   | 123.4(2) |
| C(3)-N(1)-H(1N) | 116(3)   | N(4)-C(3)-N(2)   | 119.4(2) |
| B(3)-N(1)-H(1N) | 117(3)   | N(1)-C(3)-N(2)   | 117.2(2) |
| C(4)-N(2)-N(5)  | 108.7(2) | N(6)-C(4)-N(2)   | 112.2(2) |
| C(4)-N(2)-C(3)  | 124.5(2) | N(6)-C(4)-N(3)   | 132.0(2) |
| N(5)-N(2)-C(3)  | 126.6(2) | N(2)-C(4)-N(3)   | 115.7(2) |
| C(4)-N(3)-C(13) | 135.2(2) | N(7)-C(5)-N(4)   | 126.2(2) |
| C(4)-N(3)-C(5)  | 118.3(2) | N(7)-C(5)-N(3)   | 109.9(2) |
| C(13)-N(3)-C(5) | 105.6(2) | N(4)-C(5)-N(3)   | 123.9(2) |
| C(3)-N(4)-C(5)  | 117.7(2) | N(5)-C(6)-N(6)   | 115.6(2) |
| C(6)-N(5)-N(2)  | 101.9(2) | N(5)-C(6)-C(7)   | 123.4(2) |
| C(4)-N(6)-C(6)  | 101.5(2) | N(6)-C(6)-C(7)   | 120.9(2) |
| C(5)-N(7)-N(8)  | 106.5(2) | N(8)-C(13)-N(3)  | 107.9(2) |
| C(13)-N(8)-N(7) | 110.1(2) | N(8)-C(13)-C(14) | 126.0(2) |
|                 |          | N(3)-C(13)-C(14) | 125.9(2) |

**Table S4.** X-ray data for compound **20**.

|                   |          |                   |          |
|-------------------|----------|-------------------|----------|
| O(1A)-C(6A)       | 1.221(4) | O(1B)-C(6B)       | 1.235(5) |
| N(1A)-C(3A)       | 1.349(5) | N(1B)-C(3B)       | 1.359(5) |
| N(1A)-B(3A)       | 1.470(6) | N(1B)-B(3B)       | 1.457(6) |
| N(2A)-C(4A)       | 1.340(4) | N(2B)-C(4B)       | 1.341(5) |
| N(2A)-C(3A)       | 1.345(5) | N(2B)-C(3B)       | 1.343(5) |
| N(3A)-C(5A)       | 1.327(5) | N(3B)-C(5B)       | 1.302(5) |
| N(3A)-C(4A)       | 1.358(5) | N(3B)-C(4B)       | 1.355(5) |
| N(4A)-C(5A)       | 1.309(5) | N(4B)-C(5B)       | 1.318(5) |
| N(4A)-C(3A)       | 1.353(5) | N(4B)-C(3B)       | 1.355(5) |
| N(5A)-C(4A)       | 1.349(5) | N(5B)-C(4B)       | 1.356(5) |
| N(5A)-N(6A)       | 1.381(4) | N(5B)-N(6B)       | 1.372(4) |
| N(6A)-C(6A)       | 1.364(5) | N(6B)-C(6B)       | 1.359(5) |
| N(7A)-N(9A)       | 1.339(4) | N(7B)-N(8B)       | 1.332(4) |
| N(7A)-N(8A)       | 1.339(4) | N(7B)-N(9B)       | 1.341(4) |
| N(7A)-C(5A)       | 1.442(5) | N(7B)-C(5B)       | 1.447(5) |
| N(8A)-C(13A)      | 1.331(5) | N(8B)-C(13B)      | 1.327(5) |
| N(9A)-N(10A)      | 1.313(4) | N(9B)-N(10B)      | 1.313(5) |
| N(10A)-C(13A)     | 1.377(5) | N(10B)-C(13B)     | 1.364(5) |
|                   |          |                   |          |
| C(3A)-N(1A)-B(3A) | 128.3(4) | C(3B)-N(1B)-B(3B) | 129.5(3) |

|                      |          |                      |          |
|----------------------|----------|----------------------|----------|
| C(4A)-N(2A)-C(3A)    | 114.1(3) | C(4B)-N(2B)-C(3B)    | 113.1(3) |
| C(5A)-N(3A)-C(4A)    | 110.6(3) | C(5B)-N(3B)-C(4B)    | 110.7(3) |
| C(5A)-N(4A)-C(3A)    | 112.9(3) | C(5B)-N(4B)-C(3B)    | 111.5(3) |
| C(4A)-N(5A)-N(6A)    | 119.4(3) | C(4B)-N(5B)-N(6B)    | 119.9(3) |
| C(6A)-N(6A)-N(5A)    | 122.0(3) | C(6B)-N(6B)-N(5B)    | 120.0(3) |
| N(9A)-N(7A)-N(8A)    | 114.6(3) | N(8B)-N(7B)-N(9B)    | 113.6(3) |
| N(9A)-N(7A)-C(5A)    | 123.6(3) | N(8B)-N(7B)-C(5B)    | 123.1(3) |
| N(8A)-N(7A)-C(5A)    | 121.8(3) | N(9B)-N(7B)-C(5B)    | 123.3(3) |
| C(13A)-N(8A)-N(7A)   | 101.2(3) | C(13B)-N(8B)-N(7B)   | 102.0(3) |
| N(10A)-N(9A)-N(7A)   | 105.5(3) | N(10B)-N(9B)-N(7B)   | 105.7(3) |
| N(9A)-N(10A)-C(13A)  | 106.6(3) | N(9B)-N(10B)-C(13B)  | 106.6(3) |
| N(2A)-C(3A)-N(1A)    | 118.2(3) | N(2B)-C(3B)-N(4B)    | 125.9(4) |
| N(2A)-C(3A)-N(4A)    | 124.9(3) | N(2B)-C(3B)-N(1B)    | 117.3(3) |
| N(1A)-C(3A)-N(4A)    | 116.9(4) | N(4B)-C(3B)-N(1B)    | 116.8(3) |
| N(2A)-C(4A)-N(5A)    | 117.5(3) | N(2B)-C(4B)-N(3B)    | 127.2(4) |
| N(2A)-C(4A)-N(3A)    | 126.8(3) | N(2B)-C(4B)-N(5B)    | 118.2(4) |
| N(5A)-C(4A)-N(3A)    | 115.6(3) | N(3B)-C(4B)-N(5B)    | 114.6(3) |
| N(4A)-C(5A)-N(3A)    | 130.6(4) | N(3B)-C(5B)-N(4B)    | 131.4(4) |
| N(4A)-C(5A)-N(7A)    | 113.0(3) | N(3B)-C(5B)-N(7B)    | 114.9(3) |
| N(3A)-C(5A)-N(7A)    | 116.4(3) | N(4B)-C(5B)-N(7B)    | 113.7(3) |
| O(1A)-C(6A)-N(6A)    | 120.8(4) | O(1B)-C(6B)-N(6B)    | 121.5(4) |
| O(1A)-C(6A)-C(7A)    | 123.8(4) | O(1B)-C(6B)-C(7B)    | 122.5(4) |
| N(6A)-C(6A)-C(7A)    | 115.4(3) | N(6B)-C(6B)-C(7B)    | 115.9(4) |
| N(8A)-C(13A)-N(10A)  | 112.2(3) | N(8B)-C(13B)-N(10B)  | 112.0(4) |
| N(8A)-C(13A)-C(14A)  | 123.6(4) | N(8B)-C(13B)-C(14B)  | 124.1(4) |
| N(10A)-C(13A)-C(14A) | 124.2(3) | N(10B)-C(13B)-C(14B) | 123.9(4) |

**Table S5.** Crystal Data, Data Collection and Structure Refinement Parameters for **9**, **10**, **19**, and **20**.

| Identification code                             | <b>9</b>                                                                                             | <b>10</b>                                                                                            | <b>19</b>                                                                               | <b>20</b>                                                                                             |
|-------------------------------------------------|------------------------------------------------------------------------------------------------------|------------------------------------------------------------------------------------------------------|-----------------------------------------------------------------------------------------|-------------------------------------------------------------------------------------------------------|
| CCDC No                                         | 2177931                                                                                              | 2177932                                                                                              | 2177933                                                                                 | 2177934                                                                                               |
| Empirical formula                               | C <sub>7</sub> H <sub>14</sub> B <sub>10</sub> N <sub>12</sub><br>(CH <sub>3</sub> ) <sub>2</sub> CO | C <sub>9</sub> H <sub>18</sub> B <sub>10</sub> N <sub>12</sub><br>(CH <sub>3</sub> ) <sub>2</sub> CO | C <sub>19</sub> H <sub>22</sub> B <sub>10</sub> N <sub>8</sub><br>2(CH <sub>3</sub> OH) | C <sub>19</sub> H <sub>24</sub> B <sub>10</sub> N <sub>10</sub> O,<br>CH <sub>2</sub> Cl <sub>2</sub> |
| Molecular weight                                | 432.48                                                                                               | 460.53                                                                                               | 534.63                                                                                  | 601.51                                                                                                |
| Crystal size (mm)                               | 0.42×0.36×0.06                                                                                       | 0.50×0.50×0.10                                                                                       | 0.55×0.10×0.05                                                                          | 0.35×0.25×0.05                                                                                        |
| Temperature (K)                                 | 120(2)                                                                                               | 100(2)                                                                                               | 120(2)                                                                                  | 120(2)                                                                                                |
| Crystal system                                  | triclinic                                                                                            | monoclinic                                                                                           | orthorhombic                                                                            | triclinic                                                                                             |
| Space group                                     | <i>P</i> -1                                                                                          | <i>P</i> 2 <sub>1</sub> / <i>c</i>                                                                   | <i>Aba</i> 2                                                                            | <i>P</i> -1                                                                                           |
| <i>a</i> (Å)                                    | 6.6639(2)                                                                                            | 14.7936(5)                                                                                           | 26.624(2)                                                                               | 14.089(2)                                                                                             |
| <i>b</i> (Å)                                    | 10.5197(4)                                                                                           | 11.9606(4)                                                                                           | 28.969(2)                                                                               | 15.442(3)                                                                                             |
| <i>c</i> (Å)                                    | 16.0485(5)                                                                                           | 13.7459(5)                                                                                           | 7.2719(6)                                                                               | 16.375(3)                                                                                             |
| <i>α</i> (deg)                                  | 108.8447(7)                                                                                          | 90                                                                                                   | 90                                                                                      | 109.645(4)                                                                                            |
| <i>β</i> (deg)                                  | 92.4433(8)                                                                                           | 111.6708(12)                                                                                         | 90                                                                                      | 95.426(4)                                                                                             |
| <i>γ</i> (deg)                                  | 98.1904(8)                                                                                           | 90                                                                                                   | 90                                                                                      | 116.641(4)                                                                                            |
| <i>V</i> (Å <sup>3</sup> )                      | 1049.14(6)                                                                                           | 2260.30(14)                                                                                          | 5608.4(8)                                                                               | 2868.8(9)                                                                                             |
| <i>Z</i>                                        | 2                                                                                                    | 4                                                                                                    | 8                                                                                       | 4                                                                                                     |
| <i>d</i> <sub>calcd</sub> (g·cm <sup>-3</sup> ) | 1.369                                                                                                | 1.353                                                                                                | 1.266                                                                                   | 1.393                                                                                                 |
| linear absorption <i>μ</i> (cm <sup>-1</sup> )  | 0.088                                                                                                | 0.086                                                                                                | 0.078                                                                                   | 0.264                                                                                                 |

|                                                   |               |               |               |                |
|---------------------------------------------------|---------------|---------------|---------------|----------------|
| $2\theta_{\max}$ (deg)                            | 60            | 56            | 56            | 52             |
| Reflections collected                             | 23672         | 23119         | 38136         | 28302          |
| Independent reflections ( $R_{\text{int}}$ )      | 6138 (0.0379) | 5447 (0.0322) | 6771 (0.0630) | 11263 (0.1204) |
| Observed reflections ( $I > 2\sigma(I)$ )         | 4609          | 4609          | 5735          | 5302           |
| Number of parameters                              | 392           | 368           | 428           | 721            |
| $R_I$ (on $F$ for $I > 2\sigma(I)$ ) <sup>a</sup> | 0.0426        | 0.0419        | 0.0457        | 0.0720         |
| $wR_2$ (on $F^2$ for all data) <sup>b</sup>       | 0.1184        | 0.1038        | 0.1046        | 0.2002         |
| <i>GOOF</i>                                       | 1.010         | 1.047         | 1.075         | 0.984          |
| Largest diff. peak/hole (e Å <sup>-3</sup> )      | 0.344/-0.227  | 0.275/-0.218  | 0.247/-0.205  | 0.270/-0.288   |

$$^a R_I = \frac{\sum |F_o| - \sum |F_c|}{\sum |F_o|}$$

$$^b wR_2 = \{\sum [w(F_o^2 - F_c^2)^2] / \sum w(F_o^2)^2\}^{1/2}$$

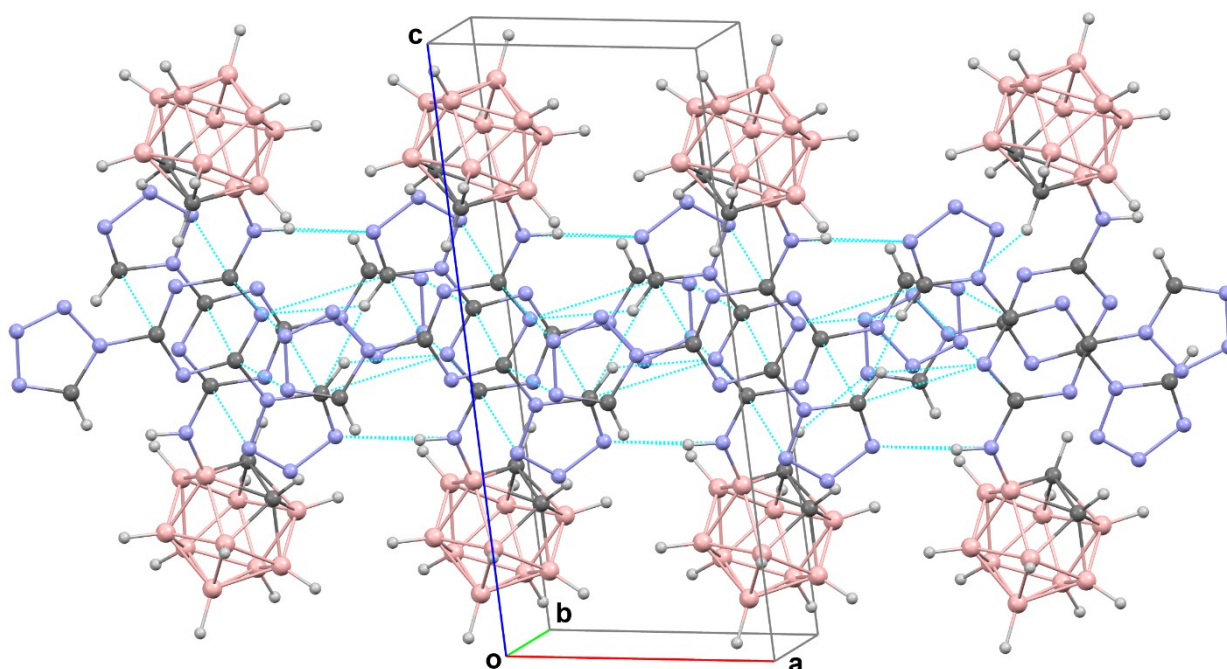

**Figure S23.** The fragment of double layer in the crystal of **9** (projection along  $b$  axis). The shortened intermolecular contacts are shown with dotted lines.

**Table S6.** Hydrogen bonds observed in the crystal of compound **9**.

| D-H...A                             | d(D-H), Å | d(H...A), Å | d(D...A), Å | <(DHA), deg. |
|-------------------------------------|-----------|-------------|-------------|--------------|
| N(1)-H(1N)...N(12A) <sup>#1</sup>   | 0.868(15) | 2.146(15)   | 3.0101(15)  | 173.9(15)    |
| C(17)-H(17B)...N(10') <sup>#1</sup> | 0.95      | 2.44        | 3.3789(15)  | 170          |
| C(17)-H(17B)...N(4A) <sup>#1</sup>  | 0.95      | 2.60        | 3.2285(15)  | 124          |
| C(16)-H(16)...O(1S)                 | 0.929(15) | 2.099(16)   | 2.982(4)    | 158.3(13)    |
| C(16)-H(16)...O(1')                 | 0.929(15) | 2.403(16)   | 3.316(3)    | 167.3(14)    |
| C(17')-H(17A)...O(1')               | 0.95      | 2.30        | 3.245(4)    | 178          |
| C(1)-H(1)...N(8) <sup>#2</sup>      | 0.998(15) | 2.405(15)   | 3.2702(17)  | 144.6(12)    |

Symmetry transformations used to generate equivalent atoms: #1 -1-x,1-y,1-z; #2. 1-x,2-y,1-z.

**Table S7.** Hydrogen bonds observed in the crystal of compound **10**.

| D-H...A                          | d(D-H), Å | d(H...A), Å | d(D...A), Å | <(DHA), deg. |
|----------------------------------|-----------|-------------|-------------|--------------|
| N(1)-H(1N)...O(1S) <sup>#1</sup> | 0.929(19) | 2.017(19)   | 2.9363(14)  | 170.1(16)    |
| C(1)-H(1)...N(12) <sup>#2</sup>  | 0.950(17) | 2.405(16)   | 3.3098(17)  | 159.0(13)    |
| C(2)-H(2)...N(2)                 | 0.990(18) | 2.443(17)   | 3.0093(17)  | 115.8(12)    |

Symmetry transformations used to generate equivalent atoms: #1. -x,-y,-z; #2 -x,1/2+y,1/2-z

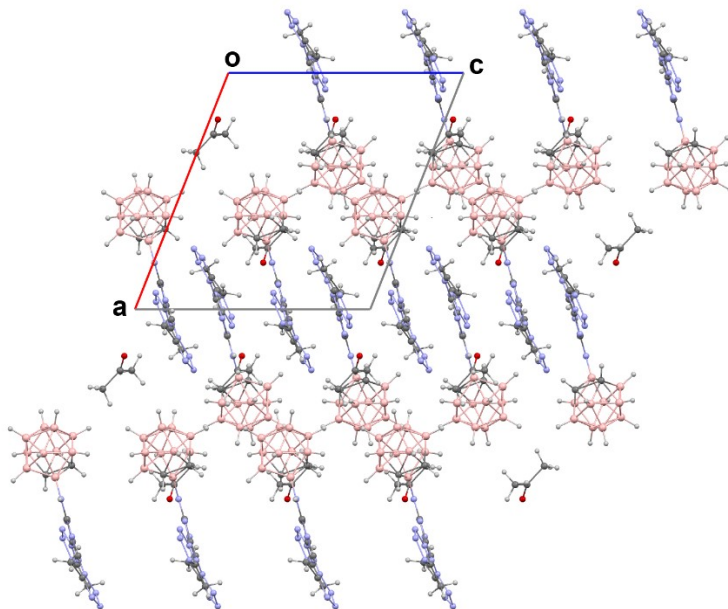**Figures S24.** Fragment of crystal packing in **10** (projection along *b* axis).**Table S8.** Hydrogen bonds observed in the crystal of compound **19**.

| D-H...A                          | d(D-H), Å | d(H...A), Å | d(D...A), Å | <(DHA), deg. |
|----------------------------------|-----------|-------------|-------------|--------------|
| N(1)-H(1N)...O(1S) <sup>#1</sup> | 0.80(4)   | 2.12(4)     | 2.892(3)    | 162(4)       |
| O(1S)-H(1S)...O(2S)              | 0.85(5)   | 1.92(5)     | 2.760(3)    | 168(4)       |
| O(2S)-H(2S)...N(8)               | 0.79(4)   | 2.05(4)     | 2.815(3)    | 161(4)       |
| C(1)-H(1)...N(7) <sup>#2</sup>   | 0.95(3)   | 2.83(3)     | 3.472(4)    | 126(3)       |
| C(2)-H(2)...N(7) <sup>#2</sup>   | 0.95(4)   | 2.65(4)     | 3.368(4)    | 133(3)       |
| C(2)-H(2)...O(2S) <sup>#2</sup>  | 0.95(4)   | 2.42(4)     | 3.253(4)    | 146(3)       |

Symmetry transformations used to generate equivalent atoms: #1. 1/2-x,y,-1/2+z; #2. 1/2-x,y,1/2+z.

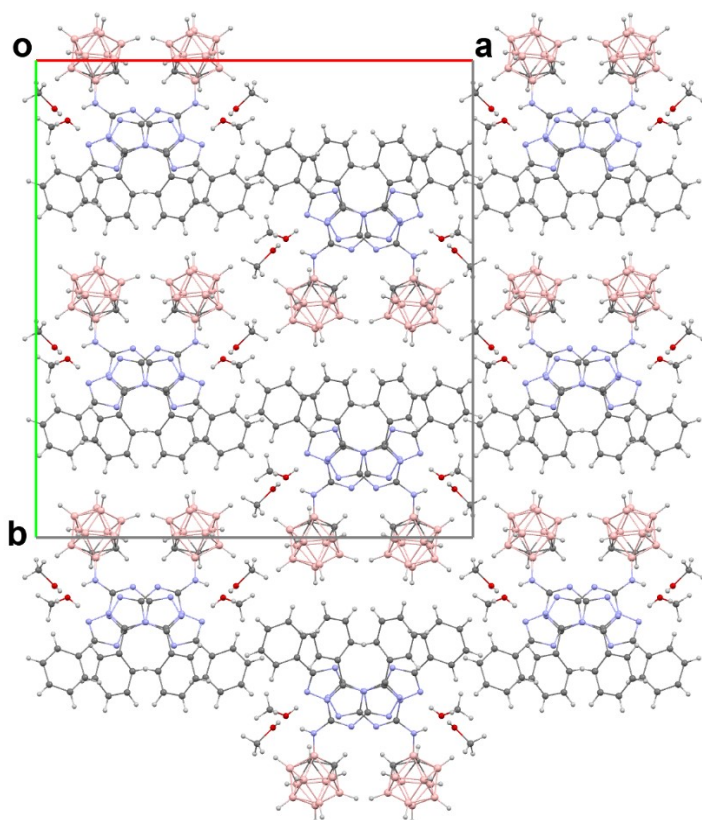

**Figure S25.** Fragment of crystal packing in **19** (projection along *c* axis).

**Table S9.** Hydrogen bonds observed in the crystal of compound **20**.

| D-H...A                            | d(D-H), Å | d(H...A), Å | d(D...A), Å | <(DHA), deg. |
|------------------------------------|-----------|-------------|-------------|--------------|
| N(5A)-H(5AA)···O(1B)               | 0.88      | 2.04        | 2.835(4)    | 150          |
| N(5B)-H(5BA)···O(1A)               | 0.88      | 2.07        | 2.871(4)    | 151          |
| N(5B)-H(5BA)···N(6B) <sup>#1</sup> | 0.88      | 2.62        | 3.281(5)    | 132          |
| N(6B)-H(6BA)···O(1A) <sup>#1</sup> | 0.88      | 2.19        | 2.891(6)    | 137          |
| C(1A)-H(1A)···N(3A) <sup>#2</sup>  | 0.98      | 2.46        | 3.424(6)    | 167          |
| C(1A)-H(1A)···N(9A) <sup>#2</sup>  | 0.98      | 2.64        | 3.319(6)    | 126          |
| C(2B)-H(2B)···N(10A)               | 0.98      | 2.45        | 3.373(6)    | 157          |

Symmetry transformations used to generate equivalent atoms: #1. 1-x,2-y,1-z; #2. 1-x,1-y,1-z.



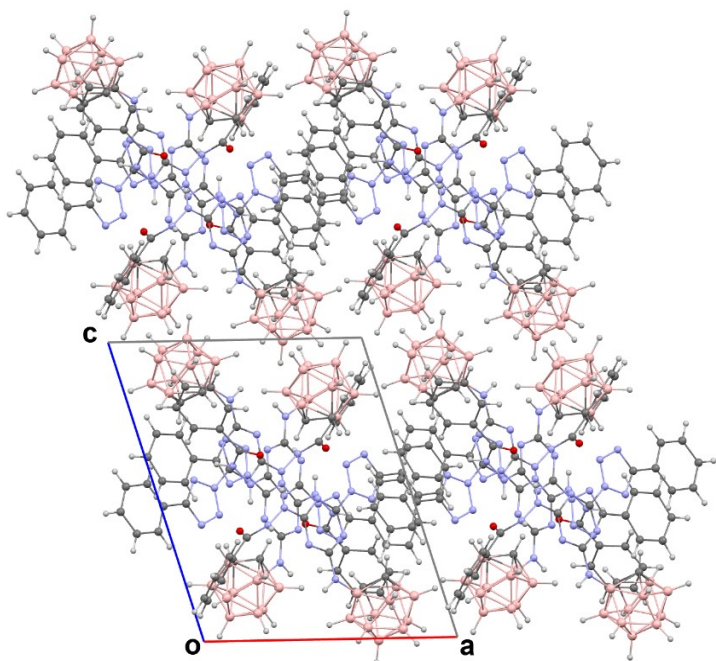

**Figure S26.** Fragment of crystal packing of **20** (projection along b axis).

#### Hirshfeld surfaces analysis.

Hirshfeld surface for all compounds plotted over  $d_{\text{norm}}$  property (white - contacts around the van der Waals radii, blue - the longer intermolecular contacts and red - shorter intermolecular contacts of the molecules) using the CrystalExplorer17 software [1].

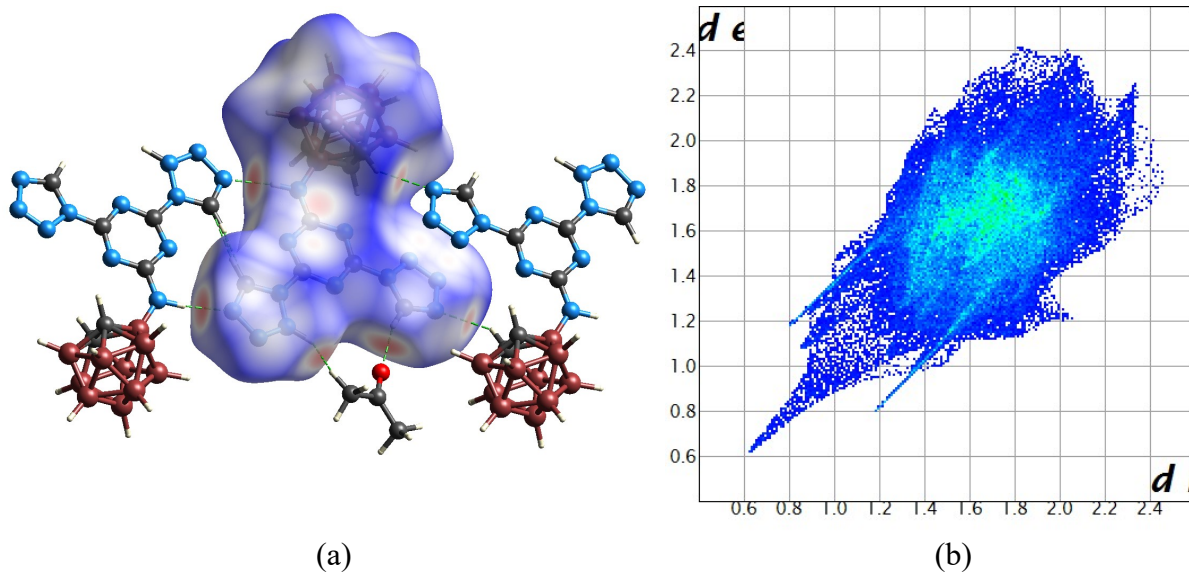

**Figure S27.** Hirshfeld surfaces (a) and full fingerprint plots (b) of compound **9**.



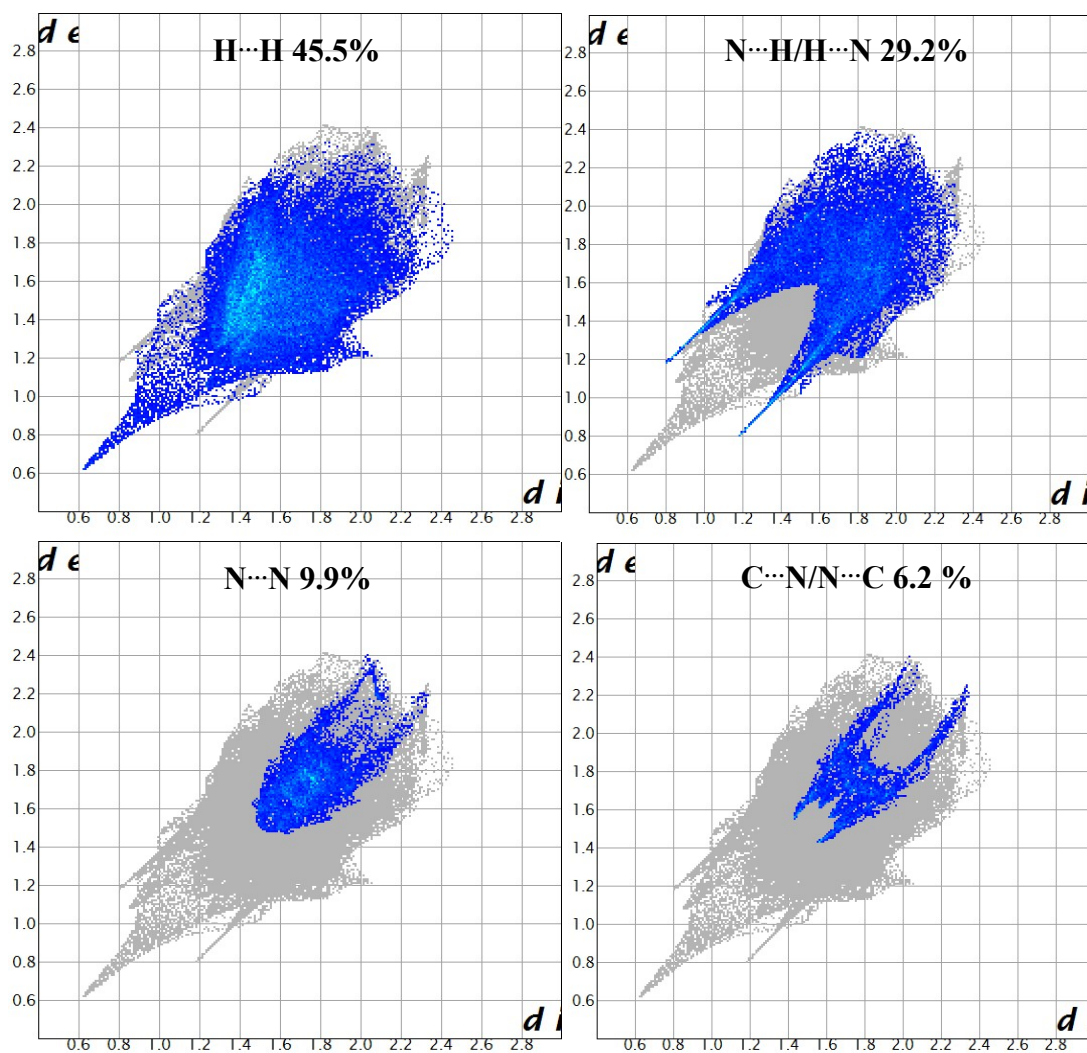

**Figure S28.** Individual interatomic contacts of compound **9** with percentage contribution in the crystal packing greater than 4.5%. The contribution of H...O/O...H 4.3%, C...H/H...C 2.4%, N...O/O...N 1% interactions.

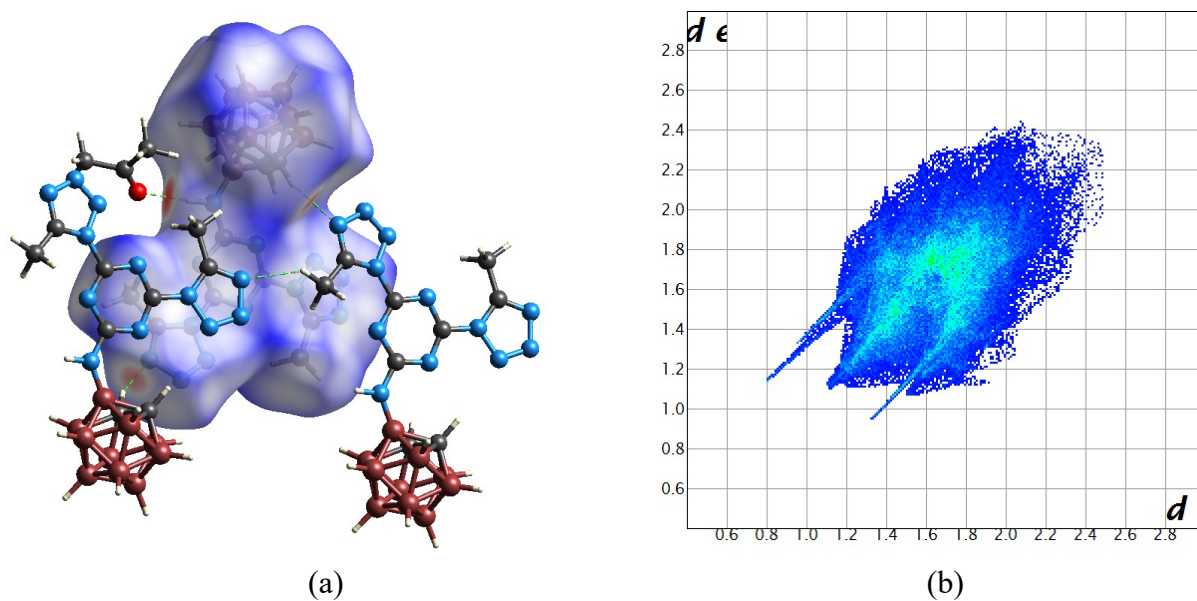

**Figure S29.** Hirshfeld surfaces (a) and full fingerprint plots (b) of compound **10**.

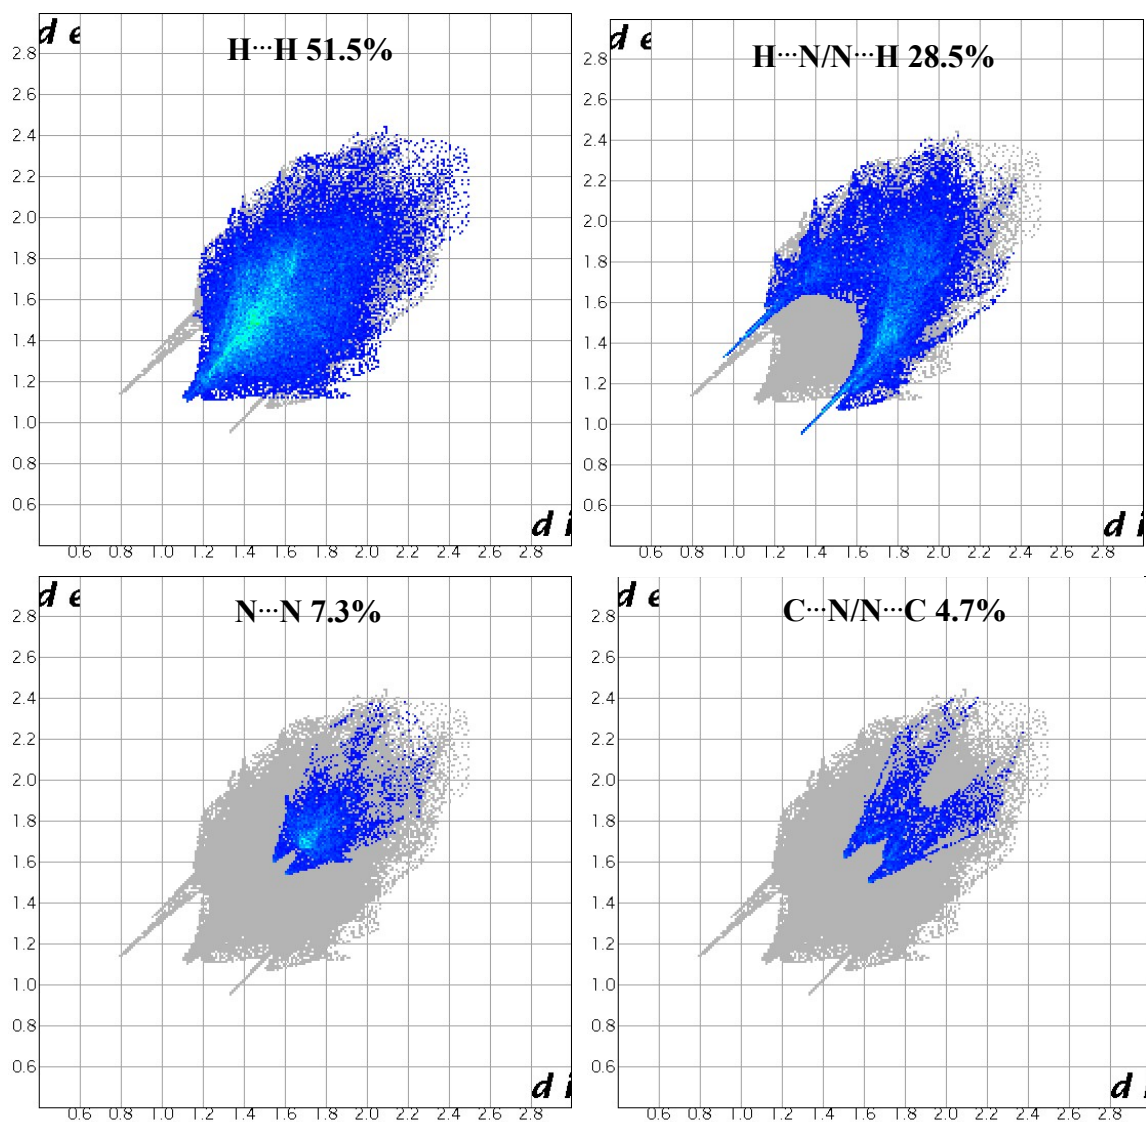

**Figure S30.** Individual interatomic contacts of compound **10** with percentage contribution in the crystal packing greater than 4.5%. The contribution of C-H+H-C 3.7%, H-O+O-H 3.3%, N-O+O-N 0.4%, C-O+O-C 0.1% interactions.

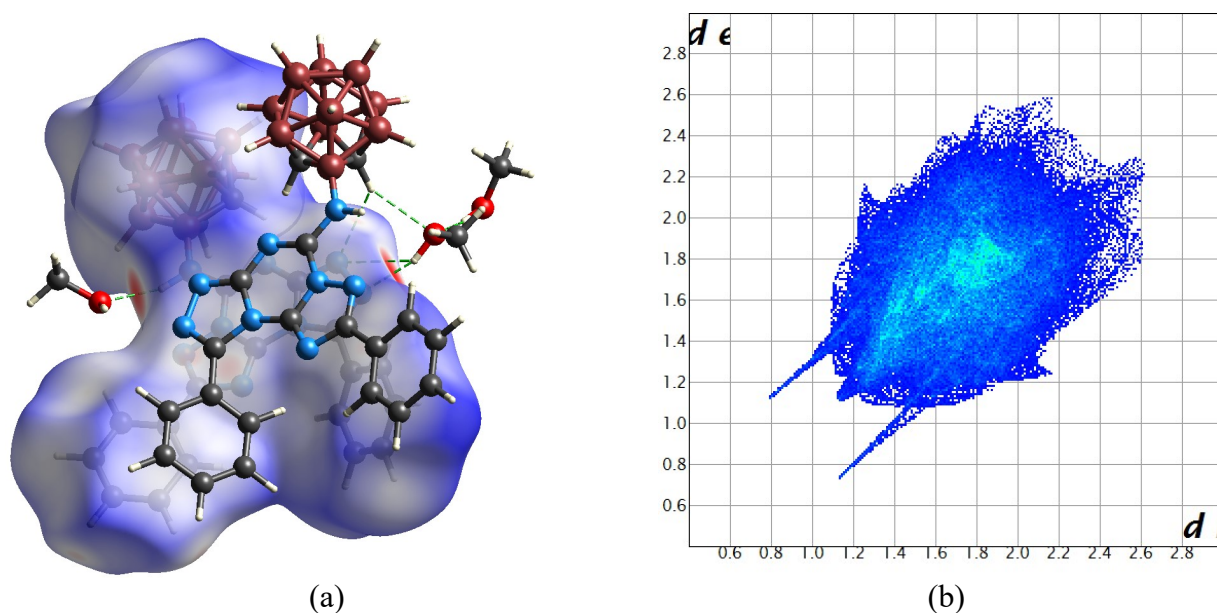

**Figure S31.** Hirshfeld surfaces (a) and full fingerprint plots (b) of compound **19**.

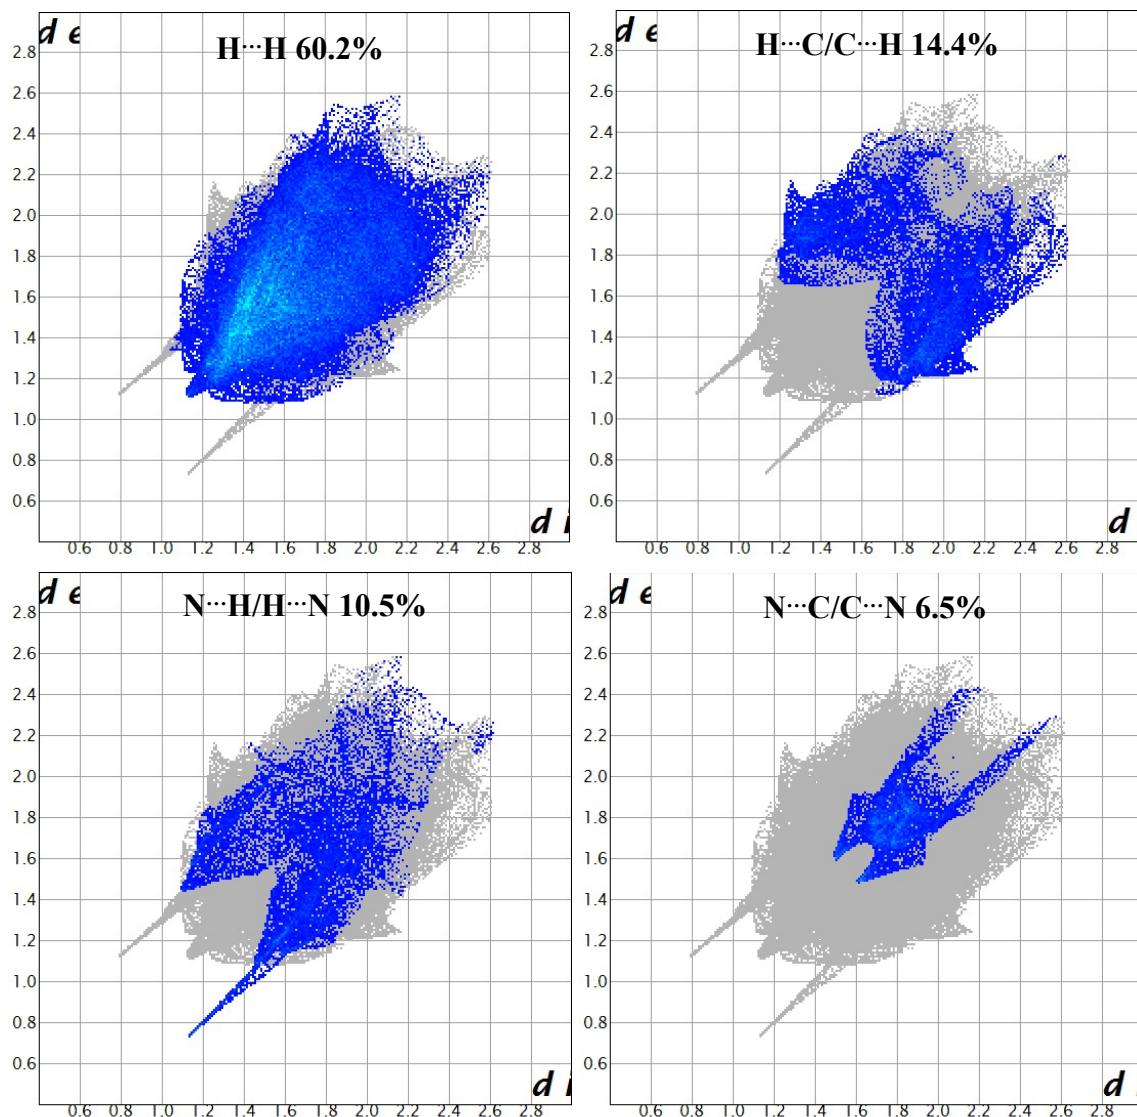

**Figure S32.** Individual interatomic contacts of compound **19** with percentage contribution in the crystal packing greater than 4.5%. The contribution of C...C 3.5%, H...O/O...H 2.5%, N...N 2.4% interactions.

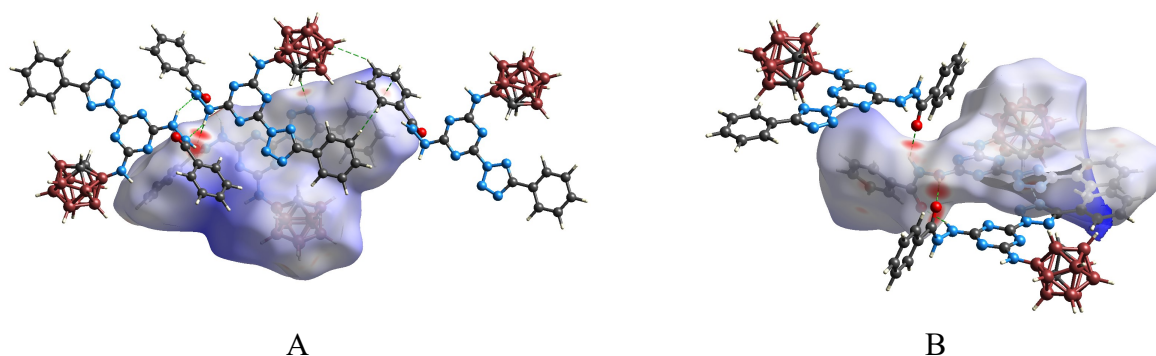

**Figure S33.** Hirshfeld surfaces of compound **20** (for two crystallographically independent molecules A and B).



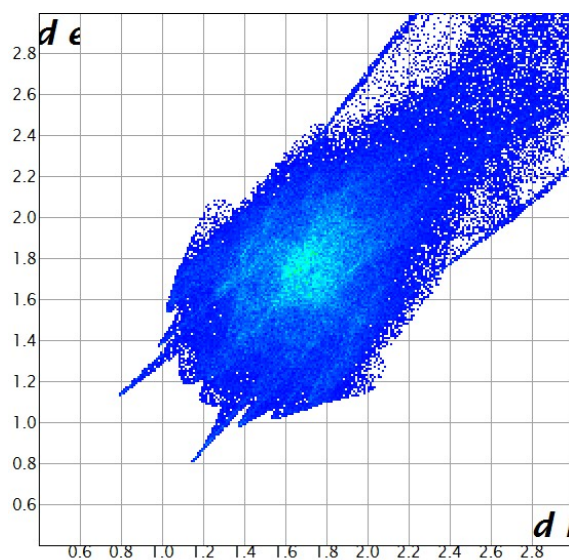

A

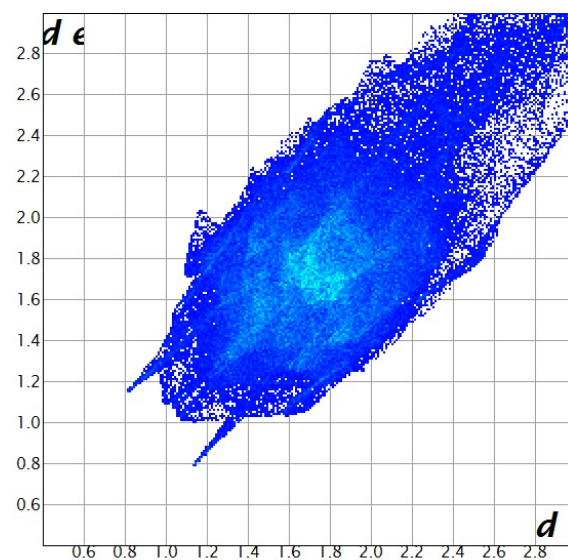

B

**Figure S34.** Full fingerprint plots (b) of compound **20** (for two crystallographically independent molecules A and B)

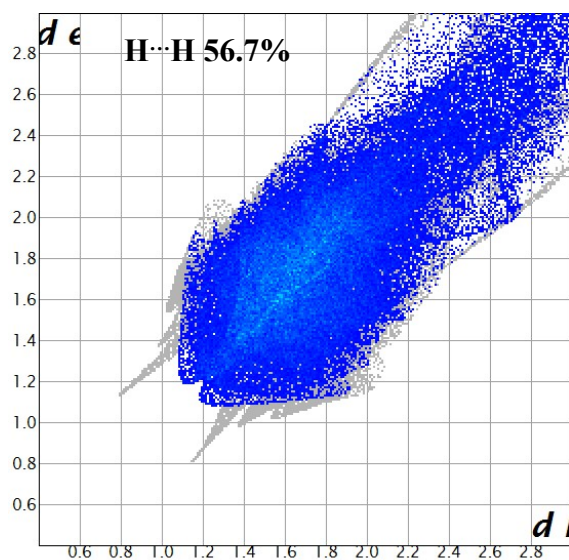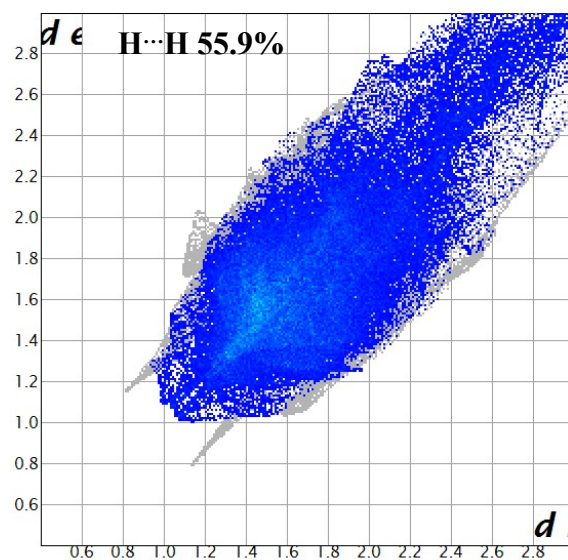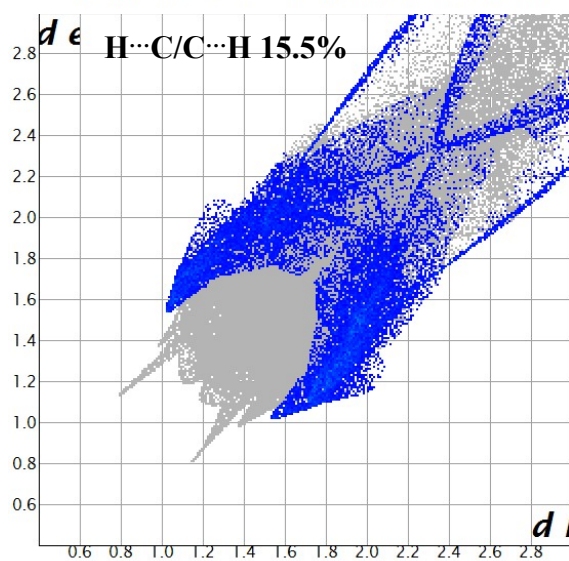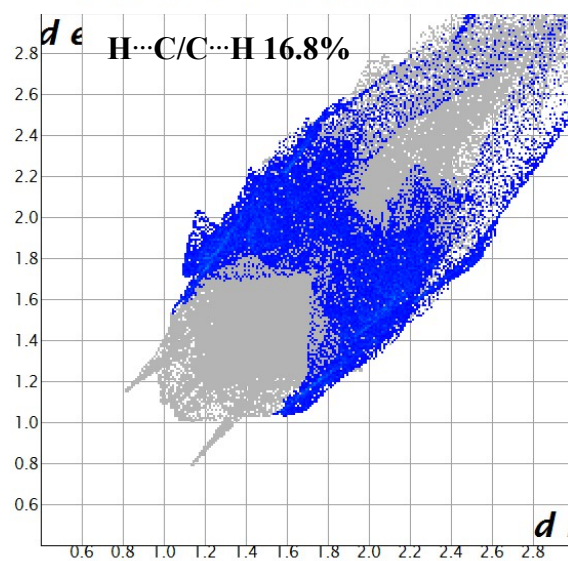

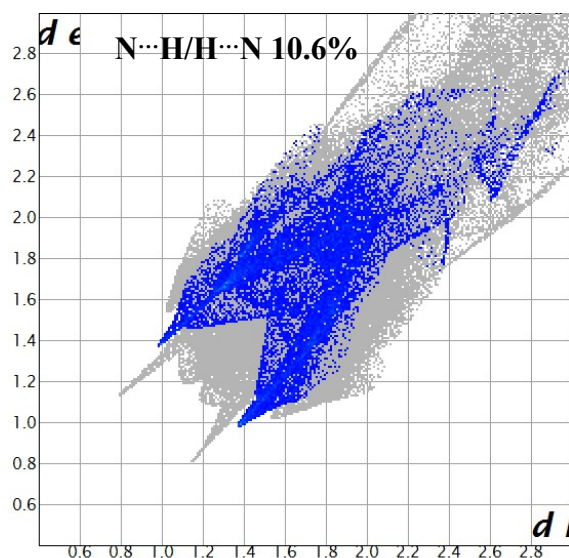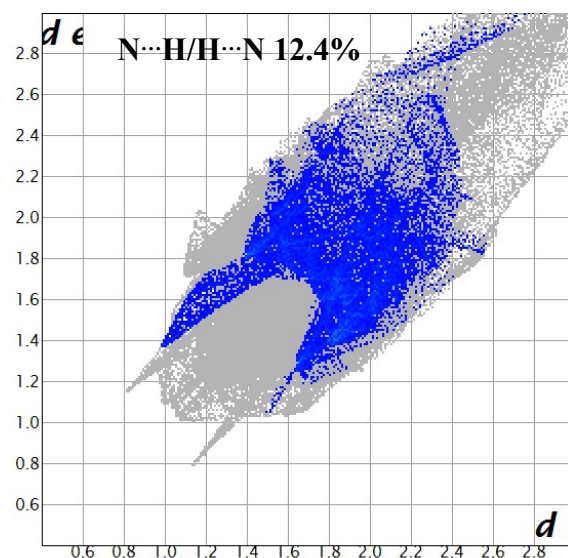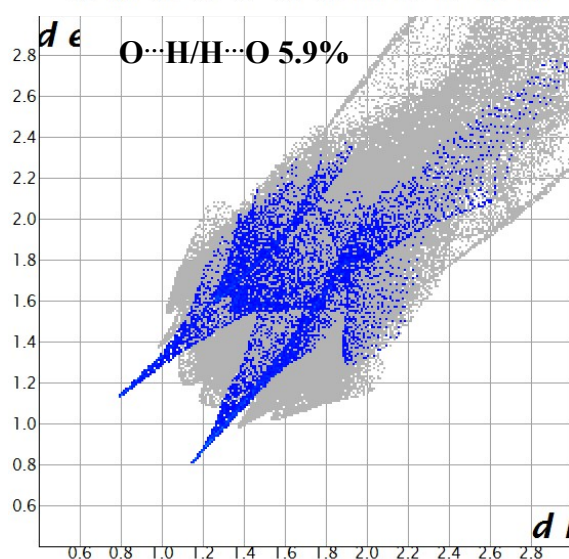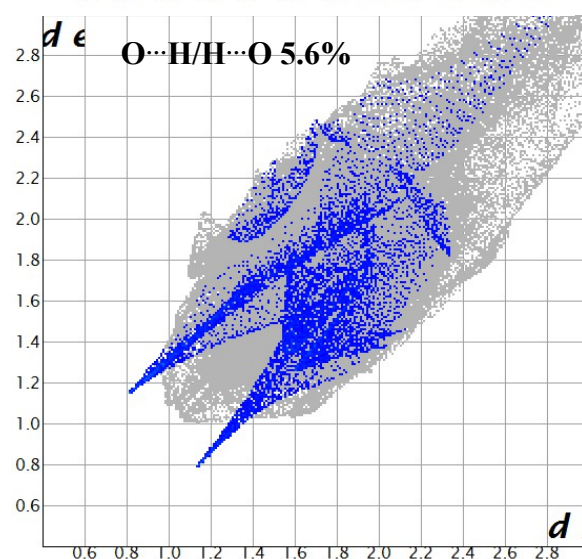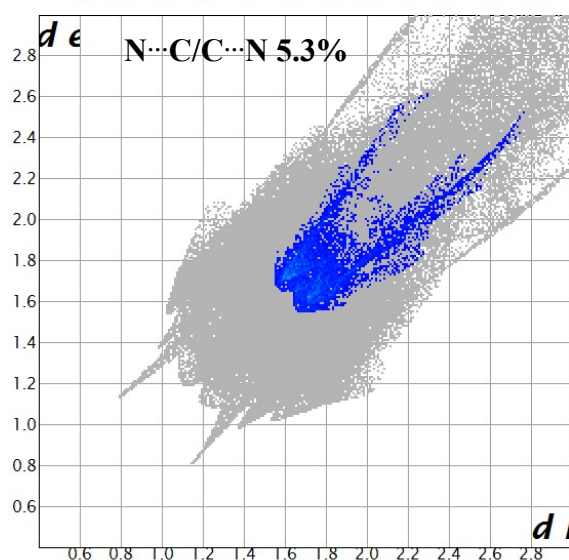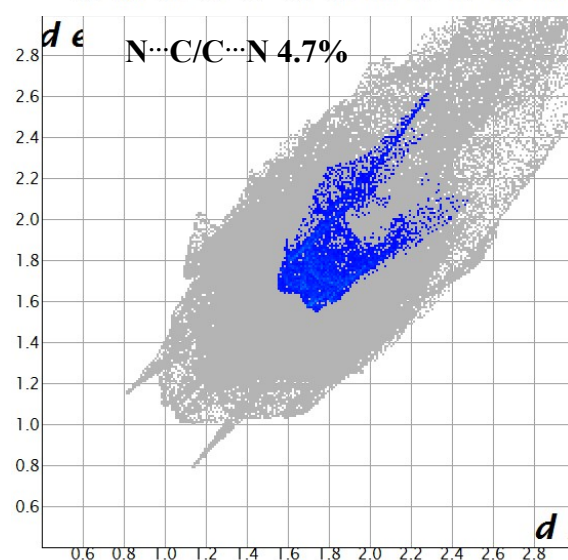

The contribution of O $\cdots$ H/H $\cdots$ O 5.9%, N $\cdots$ N 4.2%, C $\cdots$ C 1.5%, O $\cdots$ N/N $\cdots$ O 0.2% interactions indicated for molecule A.

The contribution of N $\cdots$ N 2.3%, C $\cdots$ C 2.0%, O $\cdots$ N/N $\cdots$ O 0.2% interactions indicated for molecule B.

**Figure S35.** Individual interatomic contacts of compound **20** (for two crystallographically independent molecules A and B) with percentage contribution in the crystal packing greater than 4.5%.



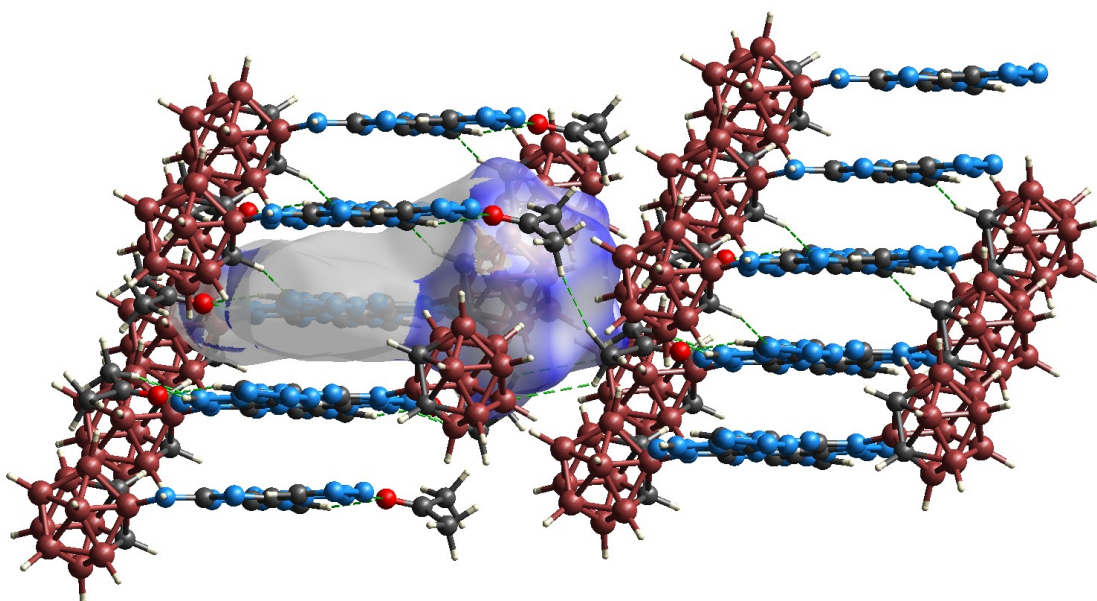

**Figure S36.** Supramolecular assembling of compound **9**. Hirshfeld surfaces mapped over  $d_{\text{norm}}$ , generated from intermolecular H...H contacts.

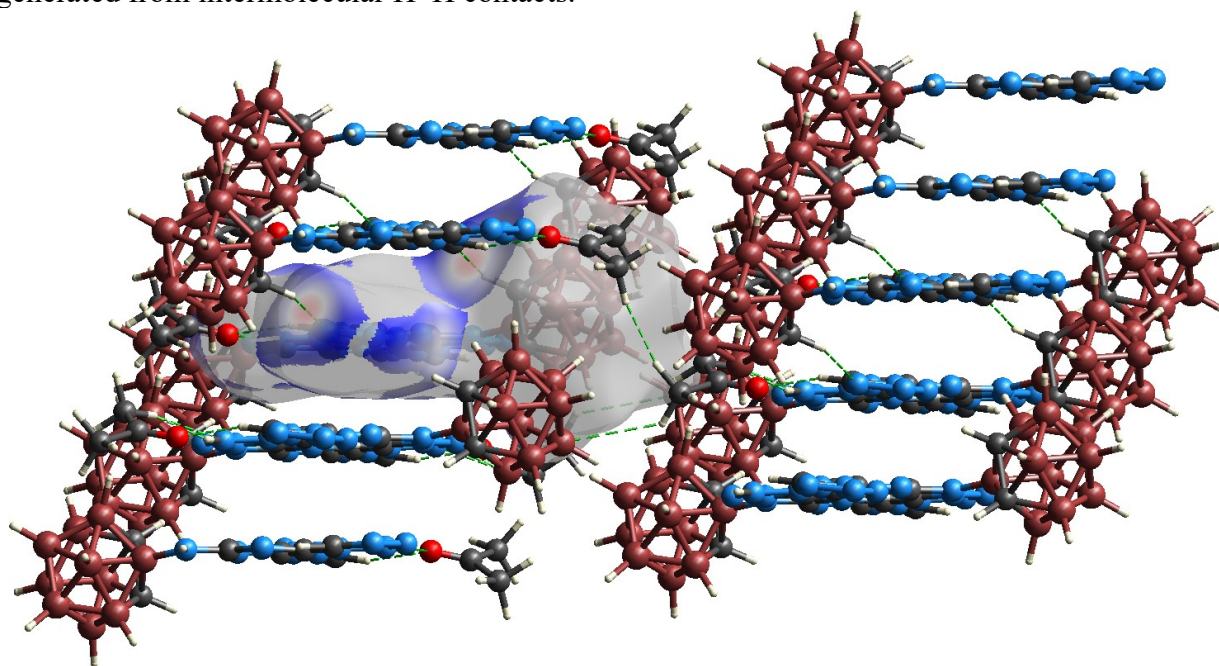

**Figure S37.** Supramolecular assembling of compound **9**. Hirshfeld surfaces mapped over  $d_{\text{norm}}$ , generated from intermolecular N...H contacts.

Calculated geometry and electronic structure of compounds 9-11, 15-17, 19 and 25.

Table S10. Geometry structure of studied compounds.

| № of compound | geometry structure                                                                   |
|---------------|--------------------------------------------------------------------------------------|
| 9             | 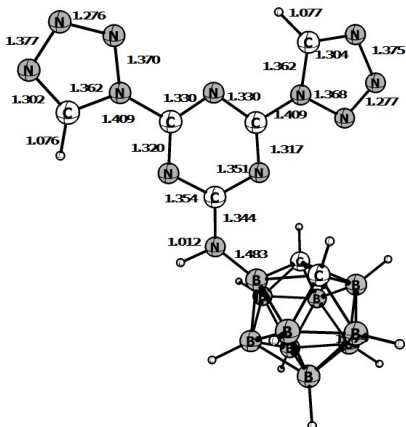   |
| 10            |   |
| 11            |  |

|    |                                                                                      |
|----|--------------------------------------------------------------------------------------|
| 15 | 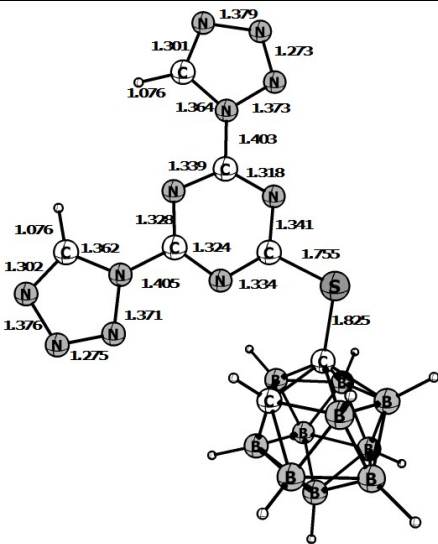   |
| 16 |   |
| 17 |  |



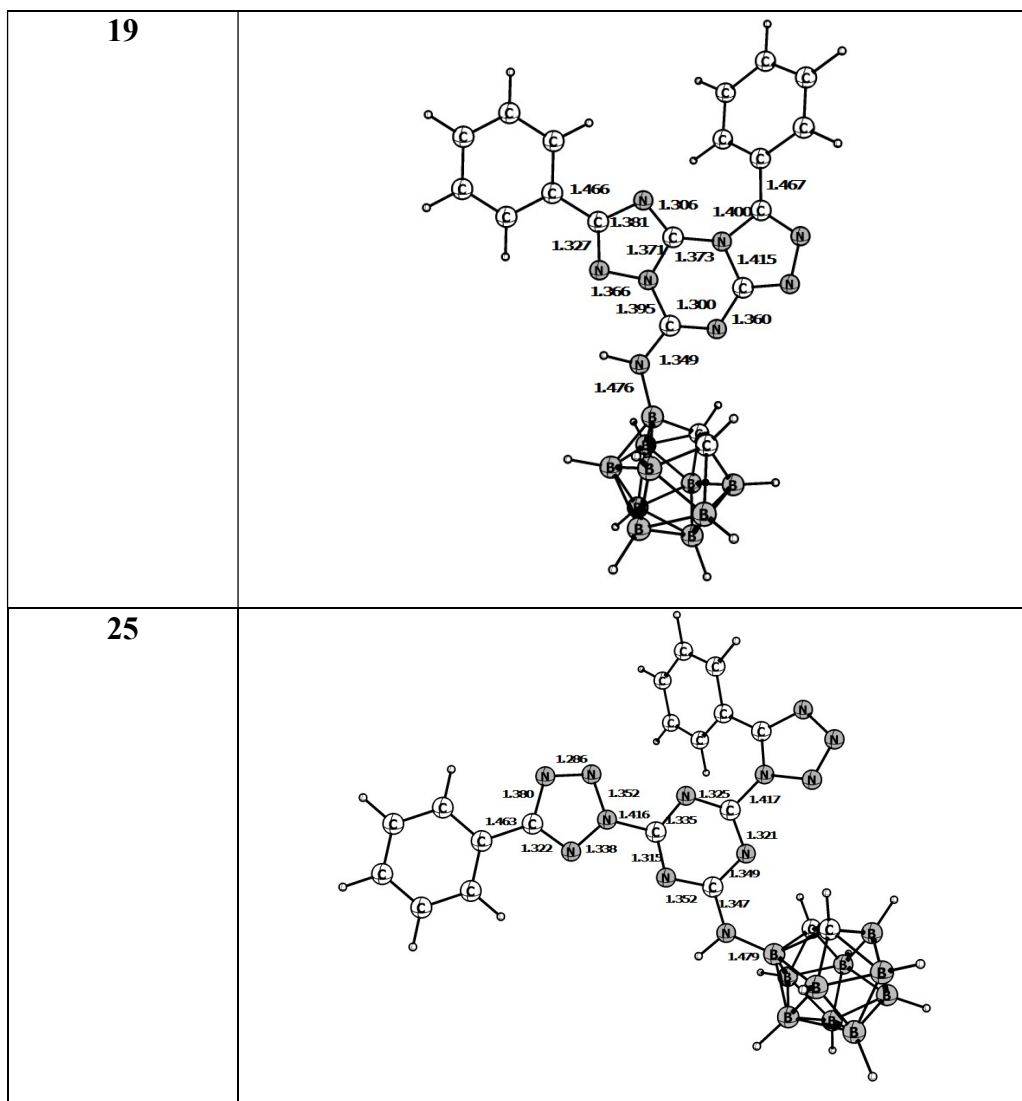

**Table S11.** The calculated values of total energy and entropy of compounds **9-11**, **15-17**, **19** and **25** (6-311+G\* basis set) in gas phase.

| Compound  | E <sub>t</sub> , a.u. | E <sub>zpc</sub> , a.u. | G, a.u.    | S, a.u. |
|-----------|-----------------------|-------------------------|------------|---------|
| <b>9</b>  | −1181.0509            | −1180.7589              | −1180.8105 | 0.0735  |
| <b>10</b> | −1259.7142            | −1259.3665              | −1259.4221 | 0.0807  |
| <b>11</b> | −1338.3563            | −1337.9513              | −1338.0110 | 0.0875  |
| <b>15</b> | −1523.8202            | −1523.5470              | −1523.5996 | 0.0752  |
| <b>16</b> | −1523.8626            | −1523.5870              | −1523.6405 | 0.0761  |
| <b>17</b> | −1523.8877            | −1523.6113              | −1523.6637 | 0.0747  |
| <b>19</b> | −1424.2702            | −1423.8363              | −1423.8949 | 0.0863  |
| <b>25</b> | −1643.2666            | −1642.8134              | −1642.8794 | 0.0974  |

**Table S12.** Comparison of calculated and experimental EOF values of test molecules (kcal/mol).

| Compound                                                              | $\Delta H_{\text{calc.}}$ (kcal/mol) | $\Delta H_{\text{exp.}}$ (kcal/mol) |
|-----------------------------------------------------------------------|--------------------------------------|-------------------------------------|
|                                                                       | Present calculations                 | Literature data                     |
| <i>o</i> -carborane (C <sub>2</sub> H <sub>12</sub> B <sub>10</sub> ) | −26.4                                | −26.4±2.6                           |
| <i>m</i> -carborane (C <sub>2</sub> H <sub>12</sub> B <sub>10</sub> ) | −42.0                                | −42.6±3.4                           |
| 1H-tetrazole                                                          | +80.0                                | +79.0±1.0                           |
| 2H-tetrazole                                                          | +77.3                                | +77.3±1.0                           |
| 5-methyl-1H-tetrazole                                                 | +71.7                                | +67.2±1.0                           |
| 1-methyl-1H-tetrazole                                                 | +78.0                                | +74.2±1.0                           |
| TTZ                                                                   | +161.8                               | +159.5 <sup>a</sup>                 |
| TETZ                                                                  | +190.3                               | +188.3 <sup>a</sup>                 |
| TAAT                                                                  | +442.2                               | +460.0 <sup>b</sup>                 |
| TAH                                                                   | +325.2                               | +336.8 <sup>b</sup>                 |
| TAT                                                                   | +258.1                               | +271.7 <sup>b</sup>                 |

<sup>a</sup> For compounds TTZ (1,2,4-triazolo-[4,3-b]-1,2,4,5-tetrazine), TETZ (tetrazolo-[1,5-b]-1,2,4,5-tetrazine) data of the right column are taken from article T. Ewi et. al. [2].

<sup>b</sup> For compounds TAAT (4,4',6,6'-tetra(azido)azo-1,3,5-triazine), TAH (2,5,8-tri(azido)-s-heptazine), TAT (2,4,6-tri(azido)-1,3,5-triazine), DiAT (3,6-di(azido)-1,2,4,5-tetrazine), which are leading HEDMs, the data of the right column are taken from article O. V. Dorofeeva et. al.[3].The experimentally evaluated EOF magnitude of TAAT [4] was found to be overestimated on 90 kcal/mol.

## References

1. Turner, M. J.; McKinnon, J. J.; Wolff, S. K.; Grimwood, D. J.; Spackman, P. R.; Jayatilaka D.; Spackman, M. A. CrystalExplorer17 (2017). University of Western Australia.
2. Ewi, T.; Zhu, W.; Zhang, J.; Xiao, H. DFT study on energetic tetrazolo-[1,5-b]-1,2,4,5-tetrazine and 1,2,4-triazolo-[4,3-b]-1,2,4,5-tetrazine derivatives. *J. Hazard. Mater.* **2010**, *179*, 581–590.
3. Dorofeeva, O.V.; Ryzhova, O.N.; Suntsova, M.A. Accurate Prediction of Enthalpies of Formation of Organic Azides by Combining G4 Theory Calculations with an Isodesmic Reaction Scheme. *J. Phys. Chem. A* **2013**, *117*, 6835–6845.
4. Huynh, M.H.V.; Hiskey, M.A.; Pollard, C.J.; Montoya, D.P.; Hartline, E.L.; Gilardi, R. 4,4',6,6'-Tetra-Substituted Hydrazo- and Azo-1,3,5-Triazines. *J. Energ. Mat.* **2004**, *22*, 217–229.
