# Supplementary material for: Synthesis, Characterization and DFT Study of a New Family of High-Energy Compounds Based on s-Triazine, Carborane and Tetrazoles
Source: Molecules. 2022 Nov 2;27(21):7484. doi: 10.3390/molecules27217484 (PMC9656522; doi:10.3390/molecules27217484)
Supplement: Supplementary file 1 [file molecules-27-07484-s001.zip]

Archive with 9 entries (9 files):
- checkcif_10.pdf
- checkcif_19.pdf
- checkcif_20.pdf
- checkcif_9.pdf
- Compound_10.cif
- Compound_19.cif
- Compound_20.cif
- Compound_9.cif
- molecules-1978746-supplementary.pdf
