# Supplementary material for: Synthesis, Characterization and DFT Study of a New Family of High-Energy Compounds Based on s-Triazine, Carborane and Tetrazoles
Source: Molecules. 2022 Nov 2;27(21):7484. doi: 10.3390/molecules27217484 (PMC9656522; doi:10.3390/molecules27217484)
Supplement: Supplementary file 1 [file molecules-27-07484-s001.zip › Compound_9.cif]

 
data_sad 
  
_audit_creation_method            'SHELXL-2018/3' 
_shelx_SHELXL_version_number      '2018/3' 
_chemical_name_systematic         ? 
_chemical_name_common             ? 
_chemical_melting_point           ? 
_chemical_formula_moiety          
 'C7 H14 B10 N12, C3 H6 O' 
_chemical_formula_sum 
 'C10 H20 B10 N12 O' 
_chemical_formula_weight          432.48 
  
loop_ 
 _atom_type_symbol 
 _atom_type_description 
 _atom_type_scat_dispersion_real 
 _atom_type_scat_dispersion_imag 
 _atom_type_scat_source 
 'C'  'C'   0.0033   0.0016 
 'International Tables Vol C Tables 4.2.6.8 and 6.1.1.4' 
 'H'  'H'   0.0000   0.0000 
 'International Tables Vol C Tables 4.2.6.8 and 6.1.1.4' 
 'B'  'B'   0.0013   0.0007 
 'International Tables Vol C Tables 4.2.6.8 and 6.1.1.4' 
 'N'  'N'   0.0061   0.0033 
 'International Tables Vol C Tables 4.2.6.8 and 6.1.1.4' 
 'O'  'O'   0.0106   0.0060 
 'International Tables Vol C Tables 4.2.6.8 and 6.1.1.4' 
  
_space_group_crystal_system       triclinic 
_space_group_IT_number            2 
_space_group_name_H-M_alt         'P -1' 
_space_group_name_Hall            '-P 1' 
  
_shelx_space_group_comment 
; 
The symmetry employed for this shelxl refinement is uniquely defined 
by the following loop, which should always be used as a source of 
symmetry information in preference to the above space-group names. 
They are only intended as comments. 
; 
  
loop_ 
 _space_group_symop_operation_xyz 
 'x, y, z' 
 '-x, -y, -z' 
  
_cell_length_a                    6.6639(2) 
_cell_length_b                    10.5197(4) 
_cell_length_c                    16.0485(5) 
_cell_angle_alpha                 108.8447(7) 
_cell_angle_beta                  92.4433(8) 
_cell_angle_gamma                 98.1904(8) 
_cell_volume                      1049.14(6) 
_cell_formula_units_Z             2 
_cell_measurement_temperature     120(2) 
_cell_measurement_reflns_used     6318 
_cell_measurement_theta_min       2.69 
_cell_measurement_theta_max       34.92 
  
_exptl_crystal_description        plate 
_exptl_crystal_colour             colourless 
_exptl_crystal_density_meas       ? 
_exptl_crystal_density_method     ? 
_exptl_crystal_density_diffrn     1.369 
_exptl_crystal_F_000              444 
_exptl_transmission_factor_min    ? 
_exptl_transmission_factor_max    ? 
_exptl_crystal_size_max           0.420 
_exptl_crystal_size_mid           0.360 
_exptl_crystal_size_min           0.060 
_exptl_absorpt_coefficient_mu     0.088 
_shelx_estimated_absorpt_T_min    0.964 
_shelx_estimated_absorpt_T_max    0.995 
_exptl_absorpt_correction_type    multi-scan 
_exptl_absorpt_correction_T_min   0.910 
_exptl_absorpt_correction_T_max   0.995 
_exptl_absorpt_process_details    SADABS 
_exptl_absorpt_special_details    ? 
_diffrn_ambient_temperature       120(2) 
_diffrn_radiation_wavelength      0.71073 
_diffrn_radiation_type            MoK\a 
_diffrn_source                    ? 
_diffrn_measurement_device_type   'Bruker APEX-II CCD' 
_diffrn_measurement_method        '\f and \w scans' 
_diffrn_detector_area_resol_mean  ? 
_diffrn_reflns_number             23672 
_diffrn_reflns_av_unetI/netI      0.0343 
_diffrn_reflns_av_R_equivalents   0.0379 
_diffrn_reflns_limit_h_min        -9 
_diffrn_reflns_limit_h_max        9 
_diffrn_reflns_limit_k_min        -14 
_diffrn_reflns_limit_k_max        14 
_diffrn_reflns_limit_l_min        -22 
_diffrn_reflns_limit_l_max        22 
_diffrn_reflns_theta_min          2.063 
_diffrn_reflns_theta_max          29.999 
_diffrn_reflns_theta_full         25.242 
_diffrn_measured_fraction_theta_max   1.000 
_diffrn_measured_fraction_theta_full  1.000 
_diffrn_reflns_Laue_measured_fraction_max    1.000 
_diffrn_reflns_Laue_measured_fraction_full   1.000 
_diffrn_reflns_point_group_measured_fraction_max   1.000 
_diffrn_reflns_point_group_measured_fraction_full  1.000 
_reflns_number_total              6138 
_reflns_number_gt                 4609 
_reflns_threshold_expression      'I > 2\s(I)' 
_reflns_Friedel_coverage          0.000 
_reflns_Friedel_fraction_max      . 
_reflns_Friedel_fraction_full     . 
  
_reflns_special_details 
; 
 Reflections were merged by SHELXL according to the crystal 
 class for the calculation of statistics and refinement. 
  
 _reflns_Friedel_fraction is defined as the number of unique 
 Friedel pairs measured divided by the number that would be 
 possible theoretically, ignoring centric projections and 
 systematic absences. 
; 
  
_computing_data_collection        'Bruker APEX2' 
_computing_cell_refinement        'Bruker SAINT' 
_computing_data_reduction         'Bruker SAINT' 
_computing_structure_solution     'SHELXS-97 (Sheldrick 2008)' 
_computing_structure_refinement 'SHELXL-2018/3 (Sheldrick, 2018)' 
_computing_molecular_graphics     'Bruker SHELXTL' 
_computing_publication_material   'Bruker SHELXTL' 
_refine_special_details           ? 
_refine_ls_structure_factor_coef  Fsqd 
_refine_ls_matrix_type            full 
_refine_ls_weighting_scheme       calc 
_refine_ls_weighting_details 
'w=1/[\s^2^(Fo^2^)+(0.0605P)^2^+0.2374P] where P=(Fo^2^+2Fc^2^)/3' 
_atom_sites_solution_primary      direct 
_atom_sites_solution_secondary    ? 
_atom_sites_solution_hydrogens    mixed 
_refine_ls_hydrogen_treatment     mixed 
_refine_ls_extinction_method      none 
_refine_ls_extinction_coef        . 
_refine_ls_number_reflns          6138 
_refine_ls_number_parameters      392 
_refine_ls_number_restraints      0 
_refine_ls_R_factor_all           0.0632 
_refine_ls_R_factor_gt            0.0426 
_refine_ls_wR_factor_ref          0.1184 
_refine_ls_wR_factor_gt           0.1043 
_refine_ls_goodness_of_fit_ref    1.010 
_refine_ls_restrained_S_all       1.010 
_refine_ls_shift/su_max           0.000 
_refine_ls_shift/su_mean          0.000 
  
loop_ 
 _atom_site_label 
 _atom_site_type_symbol 
 _atom_site_fract_x 
 _atom_site_fract_y 
 _atom_site_fract_z 
 _atom_site_U_iso_or_equiv 
 _atom_site_adp_type 
 _atom_site_occupancy 
 _atom_site_site_symmetry_order 
 _atom_site_calc_flag 
 _atom_site_refinement_flags_posn 
 _atom_site_refinement_flags_adp 
 _atom_site_refinement_flags_occupancy 
 _atom_site_disorder_assembly 
 _atom_site_disorder_group 
C1 C -0.02088(17) 0.85600(12) 0.27387(8) 0.0180(2) Uani 1 1 d . . . . . 
C2 C 0.07776(17) 0.72150(12) 0.21888(8) 0.0187(2) Uani 1 1 d . . . . . 
B3 B -0.15839(19) 0.69731(13) 0.25550(9) 0.0174(2) Uani 1 1 d . . . . . 
B4 B -0.2733(2) 0.83546(14) 0.24425(9) 0.0199(3) Uani 1 1 d . . . . . 
B5 B -0.0925(2) 0.94013(14) 0.20623(9) 0.0214(3) Uani 1 1 d . . . . . 
B6 B 0.1351(2) 0.86811(15) 0.19334(9) 0.0217(3) Uani 1 1 d . . . . . 
B7 B -0.1009(2) 0.59945(14) 0.14812(9) 0.0215(3) Uani 1 1 d . . . . . 
B8 B -0.3298(2) 0.67070(15) 0.16209(9) 0.0216(3) Uani 1 1 d . . . . . 
B9 B -0.2895(2) 0.82097(15) 0.13103(9) 0.0214(3) Uani 1 1 d . . . . . 
B10 B -0.0359(2) 0.84193(15) 0.09956(9) 0.0214(3) Uani 1 1 d . . . . . 
B11 B 0.0791(2) 0.70459(15) 0.10980(9) 0.0234(3) Uani 1 1 d . . . . . 
B12 B -0.1833(2) 0.67539(15) 0.07155(9) 0.0227(3) Uani 1 1 d . . . . . 
C13 C -0.09170(17) 0.66579(11) 0.40371(7) 0.0162(2) Uani 1 1 d . . . . . 
C14 C 0.19445(17) 0.75194(11) 0.49500(7) 0.0158(2) Uani 1 1 d . . . . . 
C15 C -0.06922(17) 0.65065(11) 0.53969(7) 0.0164(2) Uani 1 1 d . . . . . 
C16 C 0.52371(18) 0.85402(12) 0.58864(8) 0.0202(2) Uani 1 1 d . . . . . 
N1 N -0.20112(15) 0.64154(10) 0.32720(6) 0.0178(2) Uani 1 1 d . . . . . 
N2 N 0.10337(14) 0.73337(10) 0.41673(6) 0.01693(19) Uani 1 1 d . . . . . 
N3 N 0.12098(14) 0.71682(10) 0.56215(6) 0.0179(2) Uani 1 1 d . . . . . 
N4 N -0.18313(14) 0.61830(10) 0.46479(6) 0.0173(2) Uani 1 1 d . . . . . 
N5 N 0.40098(14) 0.81508(10) 0.51220(6) 0.0168(2) Uani 1 1 d . . . . . 
N6 N 0.50951(15) 0.84608(10) 0.44932(7) 0.0192(2) Uani 1 1 d . . . . . 
N7 N 0.68969(15) 0.90090(10) 0.48752(7) 0.0214(2) Uani 1 1 d . . . . . 
N8 N 0.70419(16) 0.90754(11) 0.57500(7) 0.0231(2) Uani 1 1 d . . . . . 
N9 N -0.16148(15) 0.60526(10) 0.60554(6) 0.0184(2) Uani 1 1 d . . . . . 
N10 N -0.07193(17) 0.61535(12) 0.68520(7) 0.0217(3) Uani 0.489(11) 1 d . . P A 1 
C17' C -0.07193(17) 0.61535(12) 0.68520(7) 0.0217(3) Uani 0.511(11) 1 d . . P A 2 
H17A H 0.063244 0.658097 0.708785 0.026 Uiso 0.511(11) 1 calc R U P A 2 
N11 N -0.20459(16) 0.55589(11) 0.72355(7) 0.0238(2) Uani 1 1 d . . . . . 
N12 N -0.38137(16) 0.50719(11) 0.66756(7) 0.0221(2) Uani 1 1 d . . . . . 
C17 C -0.35380(17) 0.53711(11) 0.59609(7) 0.0209(3) Uani 0.489(11) 1 d . . P A 1 
H17B H -0.450692 0.515219 0.546329 0.025 Uiso 0.489(11) 1 calc R U P A 1 
N10' N -0.35380(17) 0.53711(11) 0.59609(7) 0.0209(3) Uani 0.511(11) 1 d . . P A 2 
H1N H -0.324(2) 0.5991(16) 0.3248(10) 0.029(4) Uiso 1 1 d . . . . . 
H1 H 0.042(2) 0.9066(15) 0.3354(10) 0.025(4) Uiso 1 1 d . . . . . 
H2 H 0.186(2) 0.7003(15) 0.2521(10) 0.027(4) Uiso 1 1 d . . . . . 
H4 H -0.367(2) 0.8793(16) 0.2938(10) 0.032(4) Uiso 1 1 d . . . . . 
H5 H -0.074(2) 1.0508(17) 0.2335(11) 0.036(4) Uiso 1 1 d . . . . . 
H6 H 0.286(2) 0.9245(16) 0.2138(10) 0.031(4) Uiso 1 1 d . . . . . 
H7 H -0.089(2) 0.4962(16) 0.1384(10) 0.029(4) Uiso 1 1 d . . . . . 
H8 H -0.476(2) 0.6074(15) 0.1553(10) 0.028(4) Uiso 1 1 d . . . . . 
H9 H -0.415(2) 0.8540(17) 0.1015(11) 0.034(4) Uiso 1 1 d . . . . . 
H10 H 0.008(2) 0.8880(16) 0.0503(10) 0.034(4) Uiso 1 1 d . . . . . 
H11 H 0.203(2) 0.6637(16) 0.0754(10) 0.029(4) Uiso 1 1 d . . . . . 
H12 H -0.239(2) 0.6112(16) 0.0012(11) 0.032(4) Uiso 1 1 d . . . . . 
H16 H 0.483(2) 0.8435(15) 0.6410(10) 0.026(4) Uiso 1 1 d . . . . . 
C1S C 0.4978(15) 0.8044(13) 0.8360(10) 0.0327(19) Uani 0.505(12) 1 d . . P B 1 
O1S O 0.4999(16) 0.7981(5) 0.75895(18) 0.060(2) Uani 0.505(12) 1 d . . P B 1 
C2S C 0.686(2) 0.8211(13) 0.8920(8) 0.0427(18) Uani 0.505(12) 1 d . . P B 1 
H2SA H 0.803574 0.846788 0.862591 0.064 Uiso 0.505(12) 1 calc R U P B 1 
H2SB H 0.697397 0.735113 0.901971 0.064 Uiso 0.505(12) 1 calc R U P B 1 
H2SC H 0.683818 0.892544 0.948923 0.064 Uiso 0.505(12) 1 calc R U P B 1 
C3S C 0.2977(14) 0.7947(9) 0.8762(6) 0.053(2) Uani 0.505(12) 1 d . . P B 1 
H3SA H 0.186083 0.755808 0.828935 0.079 Uiso 0.505(12) 1 calc R U P B 1 
H3SB H 0.278069 0.885758 0.912898 0.079 Uiso 0.505(12) 1 calc R U P B 1 
H3SC H 0.299186 0.736063 0.912793 0.079 Uiso 0.505(12) 1 calc R U P B 1 
C1' C 0.4435(12) 0.7971(13) 0.8390(9) 0.0195(12) Uani 0.495(12) 1 d . . P B 2 
O1' O 0.3904(6) 0.7655(4) 0.76148(16) 0.0299(9) Uani 0.495(12) 1 d . . P B 2 
C2' C 0.6636(19) 0.8313(12) 0.8743(7) 0.0353(15) Uani 0.495(12) 1 d . . P B 2 
H2'A H 0.748339 0.839189 0.827186 0.053 Uiso 0.495(12) 1 calc R U P B 2 
H2'B H 0.699664 0.759162 0.895419 0.053 Uiso 0.495(12) 1 calc R U P B 2 
H2'C H 0.686742 0.918007 0.923326 0.053 Uiso 0.495(12) 1 calc R U P B 2 
C3' C 0.2954(13) 0.8047(9) 0.9072(4) 0.0386(14) Uani 0.495(12) 1 d . . P B 2 
H3'A H 0.158317 0.764297 0.877943 0.058 Uiso 0.495(12) 1 calc R U P B 2 
H3'B H 0.296984 0.900219 0.942754 0.058 Uiso 0.495(12) 1 calc R U P B 2 
H3'C H 0.333972 0.754688 0.945760 0.058 Uiso 0.495(12) 1 calc R U P B 2 
  
loop_ 
 _atom_site_aniso_label 
 _atom_site_aniso_U_11 
 _atom_site_aniso_U_22 
 _atom_site_aniso_U_33 
 _atom_site_aniso_U_23 
 _atom_site_aniso_U_13 
 _atom_site_aniso_U_12 
C1 0.0195(5) 0.0184(5) 0.0165(5) 0.0073(4) 0.0005(4) 0.0012(4) 
C2 0.0163(5) 0.0226(6) 0.0193(6) 0.0094(5) 0.0028(4) 0.0040(4) 
B3 0.0156(5) 0.0200(6) 0.0172(6) 0.0080(5) 0.0009(4) 0.0006(5) 
B4 0.0184(6) 0.0264(7) 0.0183(6) 0.0111(5) 0.0026(5) 0.0059(5) 
B5 0.0243(6) 0.0218(6) 0.0210(6) 0.0110(5) 0.0010(5) 0.0040(5) 
B6 0.0182(6) 0.0270(7) 0.0227(7) 0.0136(6) 0.0018(5) 0.0005(5) 
B7 0.0267(7) 0.0209(6) 0.0160(6) 0.0056(5) 0.0015(5) 0.0028(5) 
B8 0.0183(6) 0.0271(7) 0.0195(6) 0.0111(5) -0.0028(5) -0.0022(5) 
B9 0.0186(6) 0.0291(7) 0.0195(6) 0.0127(5) 0.0006(5) 0.0031(5) 
B10 0.0204(6) 0.0271(7) 0.0196(6) 0.0120(5) 0.0031(5) 0.0031(5) 
B11 0.0251(7) 0.0300(7) 0.0188(6) 0.0112(6) 0.0060(5) 0.0075(6) 
B12 0.0258(7) 0.0259(7) 0.0164(6) 0.0086(5) 0.0005(5) 0.0009(5) 
C13 0.0180(5) 0.0152(5) 0.0160(5) 0.0064(4) 0.0018(4) 0.0019(4) 
C14 0.0162(5) 0.0151(5) 0.0159(5) 0.0053(4) 0.0013(4) 0.0019(4) 
C15 0.0182(5) 0.0156(5) 0.0167(5) 0.0074(4) 0.0023(4) 0.0020(4) 
C16 0.0204(5) 0.0211(6) 0.0177(6) 0.0056(5) -0.0004(4) 0.0019(4) 
N1 0.0156(4) 0.0211(5) 0.0169(5) 0.0087(4) -0.0004(4) -0.0012(4) 
N2 0.0162(4) 0.0183(5) 0.0171(5) 0.0074(4) 0.0012(3) 0.0019(4) 
N3 0.0170(4) 0.0202(5) 0.0175(5) 0.0086(4) 0.0009(4) 0.0009(4) 
N4 0.0170(4) 0.0192(5) 0.0166(5) 0.0085(4) 0.0011(4) 0.0003(4) 
N5 0.0164(4) 0.0177(4) 0.0162(5) 0.0064(4) 0.0015(3) 0.0005(4) 
N6 0.0195(5) 0.0192(5) 0.0195(5) 0.0074(4) 0.0054(4) 0.0011(4) 
N7 0.0193(5) 0.0198(5) 0.0232(5) 0.0052(4) 0.0039(4) 0.0010(4) 
N8 0.0199(5) 0.0233(5) 0.0230(5) 0.0048(4) 0.0012(4) 0.0006(4) 
N9 0.0205(5) 0.0188(5) 0.0177(5) 0.0088(4) 0.0029(4) 0.0019(4) 
N10 0.0208(5) 0.0271(6) 0.0202(5) 0.0129(5) 0.0003(4) 0.0023(4) 
C17' 0.0208(5) 0.0271(6) 0.0202(5) 0.0129(5) 0.0003(4) 0.0023(4) 
N11 0.0225(5) 0.0283(6) 0.0246(5) 0.0147(4) 0.0028(4) 0.0027(4) 
N12 0.0258(5) 0.0236(5) 0.0187(5) 0.0101(4) 0.0024(4) 0.0029(4) 
C17 0.0210(5) 0.0218(5) 0.0206(5) 0.0099(4) 0.0020(4) -0.0008(4) 
N10' 0.0210(5) 0.0218(5) 0.0206(5) 0.0099(4) 0.0020(4) -0.0008(4) 
C1S 0.048(5) 0.0191(19) 0.030(2) 0.0105(16) -0.007(4) -0.001(4) 
O1S 0.108(6) 0.0520(19) 0.0234(12) 0.0184(12) -0.0069(17) 0.016(3) 
C2S 0.041(4) 0.055(3) 0.037(4) 0.023(3) -0.002(3) 0.004(2) 
C3S 0.052(4) 0.041(3) 0.067(5) 0.029(4) -0.014(4) -0.003(2) 
C1' 0.022(3) 0.019(2) 0.0173(17) 0.0081(14) -0.003(2) -0.001(2) 
O1' 0.0270(17) 0.0400(15) 0.0210(11) 0.0106(9) -0.0012(9) 0.0000(11) 
C2' 0.030(3) 0.040(3) 0.036(4) 0.017(2) -0.009(3) -0.0025(19) 
C3' 0.036(2) 0.044(2) 0.031(3) 0.010(3) 0.008(2) -0.0064(17) 
  
_geom_special_details 
; 
 All esds (except the esd in the dihedral angle between two l.s. planes) 
 are estimated using the full covariance matrix.  The cell esds are taken 
 into account individually in the estimation of esds in distances, angles 
 and torsion angles; correlations between esds in cell parameters are only 
 used when they are defined by crystal symmetry.  An approximate (isotropic) 
 treatment of cell esds is used for estimating esds involving l.s. planes. 
; 
  
loop_ 
 _geom_bond_atom_site_label_1 
 _geom_bond_atom_site_label_2 
 _geom_bond_distance 
 _geom_bond_site_symmetry_2 
 _geom_bond_publ_flag 
C1 C2 1.6495(17) . ? 
C1 B4 1.6921(18) . ? 
C1 B5 1.6989(18) . ? 
C1 B3 1.7136(17) . ? 
C1 B6 1.7176(18) . ? 
C1 H1 0.998(15) . ? 
C2 B7 1.6921(18) . ? 
C2 B11 1.7020(18) . ? 
C2 B6 1.7165(18) . ? 
C2 B3 1.7170(17) . ? 
C2 H2 0.971(15) . ? 
B3 N1 1.4717(15) . ? 
B3 B8 1.7670(19) . ? 
B3 B7 1.7886(19) . ? 
B3 B4 1.7903(19) . ? 
B4 B9 1.7709(19) . ? 
B4 B5 1.7762(19) . ? 
B4 B8 1.783(2) . ? 
B4 H4 1.059(16) . ? 
B5 B10 1.779(2) . ? 
B5 B6 1.780(2) . ? 
B5 B9 1.781(2) . ? 
B5 H5 1.090(17) . ? 
B6 B10 1.771(2) . ? 
B6 B11 1.783(2) . ? 
B6 H6 1.073(15) . ? 
B7 B12 1.775(2) . ? 
B7 B11 1.779(2) . ? 
B7 B8 1.785(2) . ? 
B7 H7 1.062(16) . ? 
B8 B9 1.794(2) . ? 
B8 B12 1.795(2) . ? 
B8 H8 1.081(15) . ? 
B9 B12 1.783(2) . ? 
B9 B10 1.7885(19) . ? 
B9 H9 1.094(16) . ? 
B10 B11 1.778(2) . ? 
B10 B12 1.789(2) . ? 
B10 H10 1.082(16) . ? 
B11 B12 1.779(2) . ? 
B11 H11 1.078(16) . ? 
B12 H12 1.126(16) . ? 
C13 N1 1.3315(14) . ? 
C13 N2 1.3625(14) . ? 
C13 N4 1.3646(14) . ? 
C14 N2 1.3142(14) . ? 
C14 N3 1.3372(14) . ? 
C14 N5 1.4143(14) . ? 
C15 N4 1.3119(14) . ? 
C15 N3 1.3299(14) . ? 
C15 N9 1.4214(14) . ? 
C16 N8 1.3117(16) . ? 
C16 N5 1.3549(15) . ? 
C16 H16 0.930(15) . ? 
N1 H1N 0.867(16) . ? 
N5 N6 1.3622(13) . ? 
N6 N7 1.2890(14) . ? 
N7 N8 1.3815(15) . ? 
N9 N10' 1.3531(14) . ? 
N9 C17 1.3531(14) . ? 
N9 N10 1.3531(14) . ? 
N9 C17' 1.3531(14) . ? 
N10 N11 1.2997(15) . ? 
C17' N11 1.2997(15) . ? 
C17' H17A 0.9500 . ? 
N11 N12 1.3777(15) . ? 
N12 N10' 1.2974(14) . ? 
N12 C17 1.2974(14) . ? 
C17 H17B 0.9500 . ? 
C1S O1S 1.217(15) . ? 
C1S C2S 1.469(17) . ? 
C1S C3S 1.511(12) . ? 
C2S H2SA 0.9800 . ? 
C2S H2SB 0.9800 . ? 
C2S H2SC 0.9800 . ? 
C3S H3SA 0.9800 . ? 
C3S H3SB 0.9800 . ? 
C3S H3SC 0.9800 . ? 
C1' O1' 1.202(14) . ? 
C1' C3' 1.496(12) . ? 
C1' C2' 1.500(15) . ? 
C2' H2'A 0.9800 . ? 
C2' H2'B 0.9800 . ? 
C2' H2'C 0.9800 . ? 
C3' H3'A 0.9800 . ? 
C3' H3'B 0.9800 . ? 
C3' H3'C 0.9800 . ? 
  
loop_ 
 _geom_angle_atom_site_label_1 
 _geom_angle_atom_site_label_2 
 _geom_angle_atom_site_label_3 
 _geom_angle 
 _geom_angle_site_symmetry_1 
 _geom_angle_site_symmetry_3 
 _geom_angle_publ_flag 
C2 C1 B4 111.61(9) . . ? 
C2 C1 B5 111.31(9) . . ? 
B4 C1 B5 63.18(8) . . ? 
C2 C1 B3 61.36(7) . . ? 
B4 C1 B3 63.42(8) . . ? 
B5 C1 B3 115.81(9) . . ? 
C2 C1 B6 61.26(7) . . ? 
B4 C1 B6 115.28(9) . . ? 
B5 C1 B6 62.81(8) . . ? 
B3 C1 B6 114.97(9) . . ? 
C2 C1 H1 116.1(9) . . ? 
B4 C1 H1 122.9(9) . . ? 
B5 C1 H1 121.0(9) . . ? 
B3 C1 H1 116.7(8) . . ? 
B6 C1 H1 114.1(9) . . ? 
C1 C2 B7 111.40(9) . . ? 
C1 C2 B11 111.30(9) . . ? 
B7 C2 B11 63.23(8) . . ? 
C1 C2 B6 61.33(7) . . ? 
B7 C2 B6 115.38(9) . . ? 
B11 C2 B6 62.88(8) . . ? 
C1 C2 B3 61.16(7) . . ? 
B7 C2 B3 63.28(8) . . ? 
B11 C2 B3 115.66(9) . . ? 
B6 C2 B3 114.85(9) . . ? 
C1 C2 H2 115.0(9) . . ? 
B7 C2 H2 122.4(9) . . ? 
B11 C2 H2 123.4(9) . . ? 
B6 C2 H2 115.8(9) . . ? 
B3 C2 H2 114.2(9) . . ? 
N1 B3 C1 122.71(10) . . ? 
N1 B3 C2 124.25(10) . . ? 
C1 B3 C2 57.48(7) . . ? 
N1 B3 B8 124.81(10) . . ? 
C1 B3 B8 104.15(9) . . ? 
C2 B3 B8 104.15(9) . . ? 
N1 B3 B7 124.25(10) . . ? 
C1 B3 B7 104.02(9) . . ? 
C2 B3 B7 57.68(7) . . ? 
B8 B3 B7 60.26(8) . . ? 
N1 B3 B4 121.75(10) . . ? 
C1 B3 B4 57.70(7) . . ? 
C2 B3 B4 103.99(9) . . ? 
B8 B3 B4 60.17(8) . . ? 
B7 B3 B4 107.71(9) . . ? 
C1 B4 B9 104.61(9) . . ? 
C1 B4 B5 58.60(7) . . ? 
B9 B4 B5 60.26(8) . . ? 
C1 B4 B8 104.35(9) . . ? 
B9 B4 B8 60.64(8) . . ? 
B5 B4 B8 108.71(9) . . ? 
C1 B4 B3 58.87(7) . . ? 
B9 B4 B3 107.99(10) . . ? 
B5 B4 B3 108.31(9) . . ? 
B8 B4 B3 59.27(8) . . ? 
C1 B4 H4 117.7(9) . . ? 
B9 B4 H4 129.4(9) . . ? 
B5 B4 H4 120.7(9) . . ? 
B8 B4 H4 126.5(9) . . ? 
B3 B4 H4 116.9(9) . . ? 
C1 B5 B4 58.23(7) . . ? 
C1 B5 B10 104.49(10) . . ? 
B4 B5 B10 108.12(10) . . ? 
C1 B5 B6 59.11(7) . . ? 
B4 B5 B6 108.16(9) . . ? 
B10 B5 B6 59.68(8) . . ? 
C1 B5 B9 103.92(9) . . ? 
B4 B5 B9 59.72(8) . . ? 
B10 B5 B9 60.33(8) . . ? 
B6 B5 B9 107.92(10) . . ? 
C1 B5 H5 117.6(9) . . ? 
B4 B5 H5 121.0(9) . . ? 
B10 B5 H5 126.7(9) . . ? 
B6 B5 H5 116.6(9) . . ? 
B9 B5 H5 130.0(9) . . ? 
C2 B6 C1 57.41(7) . . ? 
C2 B6 B10 104.09(9) . . ? 
C1 B6 B10 104.04(9) . . ? 
C2 B6 B5 104.47(9) . . ? 
C1 B6 B5 58.08(7) . . ? 
B10 B6 B5 60.11(8) . . ? 
C2 B6 B11 58.16(8) . . ? 
C1 B6 B11 104.43(9) . . ? 
B10 B6 B11 60.02(8) . . ? 
B5 B6 B11 108.11(10) . . ? 
C2 B6 H6 117.1(8) . . ? 
C1 B6 H6 118.1(8) . . ? 
B10 B6 H6 132.1(8) . . ? 
B5 B6 H6 125.1(8) . . ? 
B11 B6 H6 123.5(8) . . ? 
C2 B7 B12 104.52(10) . . ? 
C2 B7 B11 58.66(8) . . ? 
B12 B7 B11 60.05(8) . . ? 
C2 B7 B8 104.43(10) . . ? 
B12 B7 B8 60.54(8) . . ? 
B11 B7 B8 108.54(10) . . ? 
C2 B7 B3 59.04(7) . . ? 
B12 B7 B3 107.91(10) . . ? 
B11 B7 B3 108.42(10) . . ? 
B8 B7 B3 59.27(8) . . ? 
C2 B7 H7 117.8(8) . . ? 
B12 B7 H7 129.8(8) . . ? 
B11 B7 H7 121.4(8) . . ? 
B8 B7 H7 126.0(8) . . ? 
B3 B7 H7 116.3(8) . . ? 
B3 B8 B4 60.57(8) . . ? 
B3 B8 B7 60.47(8) . . ? 
B4 B8 B7 108.19(9) . . ? 
B3 B8 B9 107.98(9) . . ? 
B4 B8 B9 59.34(8) . . ? 
B7 B8 B9 107.24(9) . . ? 
B3 B8 B12 108.00(9) . . ? 
B4 B8 B12 107.18(9) . . ? 
B7 B8 B12 59.46(8) . . ? 
B9 B8 B12 59.58(8) . . ? 
B3 B8 H8 118.8(8) . . ? 
B4 B8 H8 120.8(8) . . ? 
B7 B8 H8 121.4(8) . . ? 
B9 B8 H8 124.0(8) . . ? 
B12 B8 H8 124.4(8) . . ? 
B4 B9 B5 60.02(8) . . ? 
B4 B9 B12 108.23(10) . . ? 
B5 B9 B12 108.02(10) . . ? 
B4 B9 B10 107.92(9) . . ? 
B5 B9 B10 59.78(8) . . ? 
B12 B9 B10 60.11(8) . . ? 
B4 B9 B8 60.02(8) . . ? 
B5 B9 B8 108.03(9) . . ? 
B12 B9 B8 60.22(8) . . ? 
B10 B9 B8 108.17(10) . . ? 
B4 B9 H9 121.1(9) . . ? 
B5 B9 H9 121.7(9) . . ? 
B12 B9 H9 122.0(9) . . ? 
B10 B9 H9 122.3(9) . . ? 
B8 B9 H9 121.4(9) . . ? 
B6 B10 B11 60.34(8) . . ? 
B6 B10 B5 60.21(8) . . ? 
B11 B10 B5 108.44(9) . . ? 
B6 B10 B9 107.99(9) . . ? 
B11 B10 B9 107.86(10) . . ? 
B5 B10 B9 59.89(8) . . ? 
B6 B10 B12 108.00(10) . . ? 
B11 B10 B12 59.83(8) . . ? 
B5 B10 B12 107.85(9) . . ? 
B9 B10 B12 59.79(8) . . ? 
B6 B10 H10 120.0(9) . . ? 
B11 B10 H10 120.2(9) . . ? 
B5 B10 H10 121.9(8) . . ? 
B9 B10 H10 123.7(9) . . ? 
B12 B10 H10 122.7(8) . . ? 
C2 B11 B10 104.41(10) . . ? 
C2 B11 B12 103.95(9) . . ? 
B10 B11 B12 60.40(8) . . ? 
C2 B11 B7 58.11(7) . . ? 
B10 B11 B7 108.19(10) . . ? 
B12 B11 B7 59.86(8) . . ? 
C2 B11 B6 58.96(8) . . ? 
B10 B11 B6 59.64(8) . . ? 
B12 B11 B6 107.90(10) . . ? 
B7 B11 B6 107.93(9) . . ? 
C2 B11 H11 118.0(8) . . ? 
B10 B11 H11 127.2(8) . . ? 
B12 B11 H11 129.0(8) . . ? 
B7 B11 H11 120.1(8) . . ? 
B6 B11 H11 117.8(8) . . ? 
B7 B12 B11 60.08(8) . . ? 
B7 B12 B9 108.16(10) . . ? 
B11 B12 B9 108.05(10) . . ? 
B7 B12 B10 107.87(10) . . ? 
B11 B12 B10 59.77(8) . . ? 
B9 B12 B10 60.10(8) . . ? 
B7 B12 B8 59.99(8) . . ? 
B11 B12 B8 108.12(9) . . ? 
B9 B12 B8 60.20(8) . . ? 
B10 B12 B8 108.14(10) . . ? 
B7 B12 H12 120.6(8) . . ? 
B11 B12 H12 120.8(8) . . ? 
B9 B12 H12 122.8(8) . . ? 
B10 B12 H12 122.3(8) . . ? 
B8 B12 H12 121.9(8) . . ? 
N1 C13 N2 119.41(10) . . ? 
N1 C13 N4 116.99(10) . . ? 
N2 C13 N4 123.59(10) . . ? 
N2 C14 N3 129.17(10) . . ? 
N2 C14 N5 117.16(10) . . ? 
N3 C14 N5 113.65(10) . . ? 
N4 C15 N3 129.47(10) . . ? 
N4 C15 N9 115.03(10) . . ? 
N3 C15 N9 115.48(10) . . ? 
N8 C16 N5 108.39(11) . . ? 
N8 C16 H16 127.4(9) . . ? 
N5 C16 H16 124.2(10) . . ? 
C13 N1 B3 129.41(10) . . ? 
C13 N1 H1N 113.4(10) . . ? 
B3 N1 H1N 116.1(10) . . ? 
C14 N2 C13 113.57(10) . . ? 
C15 N3 C14 110.54(10) . . ? 
C15 N4 C13 113.54(9) . . ? 
C16 N5 N6 108.69(9) . . ? 
C16 N5 C14 128.67(10) . . ? 
N6 N5 C14 122.64(9) . . ? 
N7 N6 N5 105.82(9) . . ? 
N6 N7 N8 111.32(9) . . ? 
C16 N8 N7 105.79(10) . . ? 
C17 N9 N10 108.45(9) . . ? 
N10' N9 C17' 108.45(9) . . ? 
N10' N9 C15 124.71(10) . . ? 
C17 N9 C15 124.71(10) . . ? 
N10 N9 C15 126.75(10) . . ? 
C17' N9 C15 126.75(10) . . ? 
N11 N10 N9 107.51(10) . . ? 
N11 C17' N9 107.51(10) . . ? 
N11 C17' H17A 126.2 . . ? 
N9 C17' H17A 126.2 . . ? 
C17' N11 N12 108.12(10) . . ? 
N10 N11 N12 108.12(10) . . ? 
N10' N12 N11 108.60(10) . . ? 
C17 N12 N11 108.60(10) . . ? 
N12 C17 N9 107.32(10) . . ? 
N12 C17 H17B 126.3 . . ? 
N9 C17 H17B 126.3 . . ? 
N12 N10' N9 107.32(10) . . ? 
O1S C1S C2S 121.7(9) . . ? 
O1S C1S C3S 120.0(9) . . ? 
C2S C1S C3S 118.3(11) . . ? 
C1S C2S H2SA 109.5 . . ? 
C1S C2S H2SB 109.5 . . ? 
H2SA C2S H2SB 109.5 . . ? 
C1S C2S H2SC 109.5 . . ? 
H2SA C2S H2SC 109.5 . . ? 
H2SB C2S H2SC 109.5 . . ? 
C1S C3S H3SA 109.5 . . ? 
C1S C3S H3SB 109.5 . . ? 
H3SA C3S H3SB 109.5 . . ? 
C1S C3S H3SC 109.5 . . ? 
H3SA C3S H3SC 109.5 . . ? 
H3SB C3S H3SC 109.5 . . ? 
O1' C1' C3' 122.6(7) . . ? 
O1' C1' C2' 122.3(8) . . ? 
C3' C1' C2' 115.1(10) . . ? 
C1' C2' H2'A 109.5 . . ? 
C1' C2' H2'B 109.5 . . ? 
H2'A C2' H2'B 109.5 . . ? 
C1' C2' H2'C 109.5 . . ? 
H2'A C2' H2'C 109.5 . . ? 
H2'B C2' H2'C 109.5 . . ? 
C1' C3' H3'A 109.5 . . ? 
C1' C3' H3'B 109.5 . . ? 
H3'A C3' H3'B 109.5 . . ? 
C1' C3' H3'C 109.5 . . ? 
H3'A C3' H3'C 109.5 . . ? 
H3'B C3' H3'C 109.5 . . ? 
  
loop_
_geom_hbond_atom_site_label_D
_geom_hbond_atom_site_label_H
_geom_hbond_atom_site_label_A
_geom_hbond_distance_DH
_geom_hbond_distance_HA
_geom_hbond_distance_DA
_geom_hbond_angle_DHA
_geom_hbond_site_symmetry_A
_geom_hbond_publ_flag
N1      H1N     N12      0.868(15)  2.146(15) 3.0101(15)  173.9(15)   2_466 yes
C1      H1      N8       0.998(15)  2.405(15) 3.2702(17)  144.6(12)   2_676 yes
C16     H16     O1S      0.929(15)  2.099(16)   2.982(4)  158.3(13)     .   yes
C16     H16     O1'      0.929(15)  2.403(16)   3.316(3)  167.3(14)     .   yes
C17'    H17A    O1'         0.9500     2.3000   3.245(4)     178.00     .   yes


_refine_diff_density_max    0.344 
_refine_diff_density_min   -0.227 
_refine_diff_density_rms    0.048 
  
_shelx_res_file 
; 
  
TITL sad in P-1 
    sad.res 
    created by SHELXL-2018/3 at 20:21:21 on 24-Sep-2021 
CELL 0.71073   6.66390  10.51970  16.04850 108.8447  92.4433  98.1904 
ZERR    2.00   0.00020   0.00040   0.00050   0.0007   0.0008   0.0008 
LATT  1 
SFAC C H B N O 
UNIT 20 40 20 24 2 
  
TEMP -153.000 
SIZE 0.06 0.36 0.42 
  
acta 
omit -4 60 
  
omit 0 0 1 
  
L.S. 8 
BOND $H 
FMAP 2 
PLAN 40 
  
WGHT    0.060500    0.237400 
FVAR       0.16990  -0.07193   0.61535   0.68520   0.48915   0.02082   0.02714 
FVAR       0.02024   0.01288   0.00035   0.00229  -0.35380   0.53711   0.59609 
FVAR       0.02097   0.02176   0.02061   0.00990   0.00198  -0.00083   0.50463 
C1    1   -0.020879    0.856000    0.273869    11.00000    0.01947    0.01838 = 
         0.01646    0.00730    0.00054    0.00117 
C2    1    0.077762    0.721499    0.218878    11.00000    0.01631    0.02261 = 
         0.01928    0.00939    0.00284    0.00396 
B3    3   -0.158391    0.697314    0.255497    11.00000    0.01561    0.01998 = 
         0.01716    0.00801    0.00093    0.00065 
B4    3   -0.273260    0.835460    0.244247    11.00000    0.01839    0.02644 = 
         0.01827    0.01107    0.00265    0.00594 
B5    3   -0.092467    0.940134    0.206226    11.00000    0.02433    0.02175 = 
         0.02095    0.01102    0.00098    0.00401 
B6    3    0.135110    0.868106    0.193337    11.00000    0.01821    0.02701 = 
         0.02269    0.01363    0.00183    0.00047 
B7    3   -0.100911    0.599447    0.148115    11.00000    0.02670    0.02091 = 
         0.01602    0.00564    0.00147    0.00277 
B8    3   -0.329818    0.670698    0.162091    11.00000    0.01830    0.02709 = 
         0.01954    0.01111   -0.00278   -0.00218 
B9    3   -0.289486    0.820975    0.131026    11.00000    0.01865    0.02907 = 
         0.01954    0.01267    0.00056    0.00309 
B10   3   -0.035863    0.841930    0.099556    11.00000    0.02037    0.02713 = 
         0.01962    0.01200    0.00314    0.00306 
B11   3    0.079140    0.704594    0.109799    11.00000    0.02513    0.02999 = 
         0.01877    0.01123    0.00601    0.00755 
B12   3   -0.183308    0.675395    0.071549    11.00000    0.02584    0.02595 = 
         0.01635    0.00858    0.00048    0.00085 
C13   1   -0.091697    0.665791    0.403715    11.00000    0.01801    0.01525 = 
         0.01598    0.00641    0.00177    0.00191 
C14   1    0.194452    0.751944    0.494998    11.00000    0.01617    0.01509 = 
         0.01593    0.00530    0.00127    0.00195 
C15   1   -0.069219    0.650652    0.539688    11.00000    0.01818    0.01562 = 
         0.01667    0.00744    0.00227    0.00195 
C16   1    0.523714    0.854015    0.588637    11.00000    0.02037    0.02111 = 
         0.01773    0.00561   -0.00041    0.00190 
N1    4   -0.201123    0.641544    0.327201    11.00000    0.01560    0.02113 = 
         0.01687    0.00868   -0.00043   -0.00121 
N2    4    0.103367    0.733367    0.416729    11.00000    0.01620    0.01830 = 
         0.01705    0.00739    0.00125    0.00186 
N3    4    0.120981    0.716821    0.562146    11.00000    0.01702    0.02015 = 
         0.01753    0.00857    0.00091    0.00090 
N4    4   -0.183129    0.618301    0.464789    11.00000    0.01704    0.01920 = 
         0.01657    0.00846    0.00105    0.00027 
N5    4    0.400981    0.815082    0.512201    11.00000    0.01645    0.01769 = 
         0.01620    0.00641    0.00153    0.00054 
N6    4    0.509510    0.846085    0.449318    11.00000    0.01947    0.01916 = 
         0.01945    0.00738    0.00542    0.00111 
N7    4    0.689687    0.900899    0.487515    11.00000    0.01934    0.01981 = 
         0.02320    0.00520    0.00388    0.00099 
N8    4    0.704188    0.907536    0.574997    11.00000    0.01991    0.02332 = 
         0.02301    0.00482    0.00121    0.00063 
N9    4   -0.161480    0.605262    0.605536    11.00000    0.02049    0.01883 = 
         0.01770    0.00880    0.00289    0.00191 
part 1 
N10   4   21.000000   31.000000   41.000000    51.00000   61.00000   71.00000 = 
        81.00000   91.00000  101.00000  111.00000 
part 2 
C17'  1   21.000000   31.000000   41.000000   -51.00000   61.00000   71.00000 = 
        81.00000   91.00000  101.00000  111.00000 
AFIX  43 
H17A  2    0.063244    0.658097    0.708785   -51.00000   -1.20000 
AFIX   0 
part 0 
N11   4   -0.204594    0.555893    0.723548    11.00000    0.02248    0.02832 = 
         0.02461    0.01470    0.00277    0.00268 
N12   4   -0.381367    0.507186    0.667560    11.00000    0.02582    0.02365 = 
         0.01875    0.01006    0.00244    0.00287 
part 1 
C17   1  121.000000  131.000000  141.000000    51.00000  151.00000  161.00000 = 
       171.00000  181.00000  191.00000  201.00000 
AFIX  43 
H17B  2   -0.450692    0.515219    0.546329    51.00000   -1.20000 
AFIX   0 
part 2 
N10'  4  121.000000  131.000000  141.000000   -51.00000  151.00000  161.00000 = 
       171.00000  181.00000  191.00000  201.00000 
part 0 
  
H1N   2   -0.323846    0.599128    0.324774    11.00000    0.02900 
H1    2    0.041962    0.906615    0.335424    11.00000    0.02505 
H2    2    0.185869    0.700271    0.252058    11.00000    0.02663 
H4    2   -0.366814    0.879281    0.293785    11.00000    0.03160 
H5    2   -0.074161    1.050798    0.233484    11.00000    0.03568 
H6    2    0.286271    0.924509    0.213838    11.00000    0.03082 
H7    2   -0.088529    0.496208    0.138383    11.00000    0.02868 
H8    2   -0.476480    0.607429    0.155293    11.00000    0.02841 
H9    2   -0.414614    0.853973    0.101469    11.00000    0.03391 
H10   2    0.008033    0.887985    0.050324    11.00000    0.03352 
H11   2    0.203310    0.663703    0.075360    11.00000    0.02947 
H12   2   -0.238948    0.611224    0.001195    11.00000    0.03225 
H16   2    0.482685    0.843479    0.641006    11.00000    0.02573 
PART   1 
C1S   1    0.497792    0.804406    0.835973   211.00000    0.04777    0.01909 = 
         0.02973    0.01046   -0.00713   -0.00127 
O1S   5    0.499904    0.798149    0.758952   211.00000    0.10787    0.05199 = 
         0.02343    0.01841   -0.00690    0.01602 
C2S   1    0.686331    0.821102    0.892028   211.00000    0.04070    0.05477 = 
         0.03693    0.02323   -0.00217    0.00445 
AFIX 137 
H2SA  2    0.803574    0.846788    0.862591   211.00000   -1.50000 
H2SB  2    0.697397    0.735113    0.901971   211.00000   -1.50000 
H2SC  2    0.683818    0.892544    0.948923   211.00000   -1.50000 
AFIX   0 
C3S   1    0.297714    0.794652    0.876180   211.00000    0.05195    0.04139 = 
         0.06721    0.02879   -0.01363   -0.00298 
AFIX 137 
H3SA  2    0.186083    0.755808    0.828935   211.00000   -1.50000 
H3SB  2    0.278069    0.885758    0.912898   211.00000   -1.50000 
H3SC  2    0.299186    0.736063    0.912793   211.00000   -1.50000 
AFIX   0 
PART   2 
C1'   1    0.443504    0.797142    0.839011  -211.00000    0.02181    0.01895 = 
         0.01731    0.00813   -0.00344   -0.00124 
O1'   5    0.390435    0.765459    0.761482  -211.00000    0.02701    0.03997 = 
         0.02104    0.01058   -0.00123   -0.00004 
C2'   1    0.663633    0.831337    0.874292  -211.00000    0.02964    0.03980 = 
         0.03596    0.01698   -0.00924   -0.00246 
AFIX 137 
H2'A  2    0.748339    0.839189    0.827186  -211.00000   -1.50000 
H2'B  2    0.699664    0.759162    0.895419  -211.00000   -1.50000 
H2'C  2    0.686742    0.918007    0.923326  -211.00000   -1.50000 
AFIX   0 
C3'   1    0.295429    0.804742    0.907250  -211.00000    0.03583    0.04379 = 
         0.03078    0.01002    0.00758   -0.00642 
AFIX 137 
H3'A  2    0.158317    0.764297    0.877943  -211.00000   -1.50000 
H3'B  2    0.296984    0.900219    0.942754  -211.00000   -1.50000 
H3'C  2    0.333972    0.754688    0.945760  -211.00000   -1.50000 
PART   0 
  
AFIX   0 
HKLF 4 
  
  
  
  
REM  sad in P-1 
REM wR2 = 0.118375, GooF = S = 1.01014, Restrained GooF = 1.01014 for all data 
REM R1 = 0.042594 for 4609 Fo > 4sig(Fo) and 0.063221 for all 6138 data 
REM 392 parameters refined using 0 restraints 
  
END 
  
WGHT      0.0605      0.2373 
  
REM Highest difference peak  0.344,  deepest hole -0.227,  1-sigma level  0.048 
Q1    1   0.0047  0.7045  0.4126  11.00000  0.05    0.34 
Q2    1  -0.1406  0.6418  0.4367  11.00000  0.05    0.34 
Q3    1  -0.2528  0.5618  0.5916  11.00000  0.05    0.33 
Q4    1  -0.1629  0.6591  0.2924  11.00000  0.05    0.32 
Q5    1   0.1501  0.7410  0.5328  11.00000  0.05    0.31 
Q6    1   0.0352  0.6848  0.5495  11.00000  0.05    0.30 
Q7    1  -0.1221  0.6278  0.5707  11.00000  0.05    0.29 
Q8    1   0.4637  0.8244  0.5488  11.00000  0.05    0.29 
Q9    1   0.4469  0.8252  0.4859  11.00000  0.05    0.28 
Q10   1   0.1497  0.7228  0.4502  11.00000  0.05    0.28 
Q11   1  -0.1389  0.6388  0.5008  11.00000  0.05    0.27 
Q12   1  -0.1565  0.8752  0.1560  11.00000  0.05    0.25 
Q13   1  -0.2740  0.5852  0.4557  11.00000  0.05    0.25 
Q14   1   0.0841  0.8181  0.1417  11.00000  0.05    0.23 
Q15   1   0.3059  0.7919  0.5018  11.00000  0.05    0.23 
Q16   1  -0.1486  0.8443  0.2666  11.00000  0.05    0.22 
Q17   1  -0.0394  0.6635  0.2057  11.00000  0.05    0.22 
Q18   1   0.0306  0.6780  0.1636  11.00000  0.05    0.21 
Q19   1  -0.3750  0.5120  0.6323  11.00000  0.05    0.21 
Q20   1   0.6292  0.8817  0.5860  11.00000  0.05    0.21 
Q21   1  -0.1652  0.8007  0.1055  11.00000  0.05    0.21 
Q22   1  -0.1166  0.6198  0.3436  11.00000  0.05    0.21 
Q23   1  -0.2692  0.7150  0.2278  11.00000  0.05    0.21 
Q24   1   0.7654  0.9256  0.4551  11.00000  0.05    0.21 
Q25   1  -0.0996  0.5898  0.6300  11.00000  0.05    0.20 
Q26   1   0.1454  0.7695  0.3856  11.00000  0.05    0.20 
Q27   1   0.5916  0.9121  0.5822  11.00000  0.05    0.20 
Q28   1  -0.2346  0.6599  0.1898  11.00000  0.05    0.20 
Q29   1  -0.2160  0.6543  0.1337  11.00000  0.05    0.20 
Q30   1  -0.1681  0.6935  0.3745  11.00000  0.05    0.19 
Q31   1  -0.1526  0.5943  0.7024  11.00000  0.05    0.19 
Q32   1  -0.2371  0.8726  0.1989  11.00000  0.05    0.19 
Q33   1  -0.3214  0.7592  0.1971  11.00000  0.05    0.19 
Q34   1  -0.5245  0.4542  0.6471  11.00000  0.05    0.19 
Q35   1  -0.2945  0.5291  0.6880  11.00000  0.05    0.19 
Q36   1   0.5019  0.8017  0.3943  11.00000  0.05    0.19 
Q37   1   0.5826  0.7854  0.8558  11.00000  0.05    0.19 
Q38   1  -0.0542  0.7445  0.0905  11.00000  0.05    0.18 
Q39   1  -0.4671  0.4768  0.6992  11.00000  0.05    0.18 
Q40   1  -0.1226  0.5634  0.7004  11.00000  0.05    0.18 
; 
_shelx_res_checksum   68576 
  
_shelx_hkl_file 
; 
  -1   0   0   43.22    0.88 
  -1   0   0   42.74    0.88 
  -1   0   0   42.33    0.86 
   1   0   0   45.38    0.89 
   1   0   0   42.49    0.88 
  -2   0   0    3.87    0.15 
  -2   0   0    3.86    0.13 
  -2   0   0    3.76    0.15 
   2   0   0    3.70    0.17 
   2   0   0    3.65    0.15 
  -3   0   0    6.67    0.21 
  -3   0   0    6.89    0.24 
  -3   0   0    6.82    0.24 
   3   0   0    6.59    0.26 
   3   0   0    6.33    0.25 
  -4   0   0   10.64    0.36 
  -4   0   0   10.55    0.30 
  -4   0   0   10.84    0.36 
   4   0   0   10.14    0.38 
   4   0   0   10.98    0.38 
  -5   0   0   11.07    0.40 
  -5   0   0   10.38    0.40 
  -5   0   0   10.92    0.33 
   5   0   0   11.46    0.43 
   5   0   0   11.04    0.44 
  -6   0   0    0.83    0.11 
  -6   0   0    0.74    0.14 
  -6   0   0    0.94    0.15 
   6   0   0    0.86    0.20 
   6   0   0    0.77    0.17 
  -7   0   0    2.39    0.24 
  -7   0   0    2.54    0.24 
  -7   0   0    2.09    0.18 
   7   0   0    2.14    0.30 
   7   0   0    2.54    0.28 
  -8   0   0    2.13    0.26 
  -8   0   0    1.96    0.26 
   8   0   0    2.99    0.37 
   8   0   0    2.53    0.31 
  -9   0   0    0.62    0.18 
  -9   0   0    1.29    0.24 
   9   0   0    0.80    0.26 
   9   0   0    0.91    0.26 
 -10   0   0    4.76    0.39 
 -10   0   0    4.97    0.39 
  10   0   0    4.15    0.47 
  10   0   0    5.09    0.53 
  10  -1   0    0.27    0.28 
  10  -1   0    0.34    0.24 
 -10   1   0    0.28    0.19 
 -10   1   0    0.06    0.13 
   9  -1   0   -0.02    0.22 
   9  -1   0    0.03    0.20 
  -9   1   0   -0.08    0.11 
  -9   1   0   -0.07    0.10 
   8  -1   0    1.36    0.28 
   8  -1   0    0.92    0.23 
  -8   1   0    1.16    0.20 
  -8   1   0    1.05    0.18 
   7  -1   0   35.43    0.99 
   7  -1   0   31.37    1.03 
  -7   1   0   34.77    0.87 
  -7   1   0   34.63    0.97 
  -7   1   0   35.21    0.97 
   6  -1   0    0.22    0.14 
   6  -1   0    0.53    0.18 
  -6   1   0    0.32    0.10 
  -6   1   0    0.31    0.10 
  -6   1   0    0.35    0.09 
   5  -1   0    7.34    0.36 
   5  -1   0    7.79    0.34 
  -5   1   0    8.01    0.29 
  -5   1   0    7.85    0.32 
  -5   1   0    8.04    0.32 
   4  -1   0   37.96    0.91 
   4  -1   0   37.42    0.95 
  -4   1   0   38.19    0.86 
  -4   1   0   39.20    0.91 
  -4   1   0   38.22    0.90 
   3  -1   0   -0.05    0.07 
  -3   1   0    0.06    0.05 
  -3   1   0    0.04    0.05 
  -3   1   0   -0.03    0.05 
   2  -1   0    9.95    0.30 
   2  -1   0   10.12    0.27 
  -2   1   0    9.52    0.26 
  -2   1   0    9.73    0.26 
  -2   1   0    9.66    0.26 
   1  -1   0    0.42    0.05 
  -1   1   0    0.26    0.03 
  -1   1   0    0.30    0.04 
  -1   1   0    0.23    0.04 
   0  -1   0   10.17    0.21 
   0  -1   0    9.03    0.22 
   0  -1   0    9.94    0.20 
   0  -1   0   10.66    0.20 
   0   1   0    7.77    0.20 
  -1  -1   0  203.46    4.18 
  -1  -1   0  206.52    4.02 
  -1  -1   0  207.04    4.02 
   1   1   0  204.41    4.14 
  -2  -1   0    8.98    0.21 
  -2  -1   0    8.83    0.27 
  -2  -1   0    9.36    0.27 
  -2  -1   0    8.89    0.28 
   2   1   0    8.70    0.27 
  -3  -1   0   75.02    1.57 
  -3  -1   0   75.45    1.48 
  -3  -1   0   72.35    1.57 
   3   1   0   71.41    1.56 
   3   1   0   73.29    1.59 
  -4  -1   0    7.82    0.23 
  -4  -1   0    7.56    0.30 
  -4  -1   0    7.80    0.31 
   4   1   0    7.82    0.31 
   4   1   0    7.74    0.33 
  -5  -1   0   10.43    0.31 
  -5  -1   0   10.75    0.41 
  -5  -1   0   10.63    0.40 
   5   1   0   11.48    0.44 
   5   1   0   10.85    0.44 
  -6  -1   0    0.04    0.08 
  -6  -1   0    0.04    0.06 
  -6  -1   0   -0.01    0.08 
   6   1   0    0.12    0.12 
   6   1   0   -0.11    0.14 
  -7  -1   0    0.77    0.16 
  -7  -1   0    0.56    0.15 
   7   1   0    0.52    0.17 
   7   1   0    0.91    0.22 
  -8  -1   0    0.16    0.13 
  -8  -1   0    0.05    0.12 
   8   1   0    0.30    0.19 
   8   1   0   -0.07    0.17 
  -9  -1   0    0.17    0.13 
  -9  -1   0    0.08    0.14 
   9   1   0   -0.33    0.19 
   9   1   0   -0.07    0.17 
 -10  -1   0    1.55    0.27 
 -10  -1   0    1.38    0.26 
  10   1   0    1.87    0.37 
  10   1   0    1.02    0.32 
  10  -2   0   -0.31    0.17 
  10  -2   0    0.27    0.28 
 -10   2   0    0.05    0.13 
   9  -2   0    1.97    0.37 
   9  -2   0    1.70    0.29 
  -9   2   0    1.91    0.26 
  -9   2   0    1.57    0.23 
   8  -2   0    1.47    0.31 
   8  -2   0    1.46    0.25 
  -8   2   0    0.93    0.16 
  -8   2   0    1.06    0.19 
  -8   2   0    1.11    0.19 
   7  -2   0    0.08    0.14 
   7  -2   0    0.29    0.17 
  -7   2   0    0.03    0.09 
  -7   2   0    0.04    0.09 
  -7   2   0   -0.03    0.09 
   6  -2   0    3.69    0.29 
   6  -2   0    3.62    0.31 
  -6   2   0    3.81    0.23 
  -6   2   0    3.77    0.24 
  -6   2   0    3.64    0.24 
   5  -2   0   19.29    0.64 
   5  -2   0   20.34    0.59 
  -5   2   0   20.14    0.57 
  -5   2   0   20.46    0.55 
  -5   2   0   19.22    0.56 
   4  -2   0   27.38    0.70 
   4  -2   0   27.70    0.75 
  -4   2   0   27.40    0.68 
  -4   2   0   27.62    0.68 
  -4   2   0   27.92    0.68 
   3  -2   0    0.76    0.11 
   3  -2   0    0.56    0.12 
  -3   2   0    0.68    0.08 
  -3   2   0    0.70    0.10 
  -3   2   0    0.66    0.08 
   2  -2   0  109.38    2.25 
   2  -2   0  110.22    2.21 
   2  -2   0  112.00    2.21 
  -2   2   0  110.76    2.19 
  -2   2   0  108.45    2.22 
   1  -2   0   83.35    1.70 
   1  -2   0   83.42    1.69 
   1  -2   0   85.98    1.74 
  -1   2   0   83.00    1.71 
  -1   2   0   89.87    1.68 
   0  -2   0  214.55    4.31 
   0  -2   0  216.49    4.44 
   0  -2   0  219.78    4.37 
   0  -2   0  227.43    4.36 
   0   2   0  225.26    4.34 
  -1  -2   0   11.06    0.30 
  -1  -2   0   11.67    0.23 
  -1  -2   0   10.81    0.30 
  -1  -2   0   10.91    0.29 
   1   2   0   11.54    0.23 
   1   2   0   11.33    0.30 
  -2  -2   0   20.99    0.53 
  -2  -2   0   21.19    0.54 
  -2  -2   0   20.24    0.51 
   2   2   0   21.14    0.53 
  -3  -2   0   27.03    0.71 
  -3  -2   0   27.54    0.56 
  -3  -2   0   27.06    0.69 
  -3  -2   0   26.88    0.68 
   3   2   0   27.53    0.69 
  -4  -2   0   18.46    0.55 
  -4  -2   0   17.49    0.53 
  -4  -2   0   18.78    0.41 
   4   2   0   17.92    0.56 
   4   2   0   17.53    0.54 
  -5  -2   0    0.18    0.10 
  -5  -2   0    0.21    0.05 
  -5  -2   0    0.19    0.10 
   5   2   0    0.20    0.12 
   5   2   0    0.25    0.13 
  -6  -2   0    7.68    0.38 
  -6  -2   0    7.16    0.37 
   6   2   0    6.86    0.38 
   6   2   0    6.94    0.39 
  -7  -2   0    0.55    0.15 
  -7  -2   0    0.29    0.13 
   7   2   0    0.23    0.14 
   7   2   0    0.52    0.20 
  -8  -2   0    0.01    0.12 
  -8  -2   0   -0.08    0.11 
   8   2   0    0.18    0.16 
   8   2   0   -0.15    0.16 
  -9  -2   0    1.04    0.22 
  -9  -2   0    0.82    0.20 
   9   2   0    1.17    0.30 
   9   2   0    1.27    0.29 
 -10  -2   0    1.70    0.29 
 -10  -2   0    1.27    0.26 
  10   2   0    1.62    0.34 
  10   2   0    1.03    0.33 
  10  -3   0    0.61    0.33 
  10  -3   0    0.37    0.23 
 -10   3   0    0.88    0.20 
   9  -3   0    1.08    0.25 
   9  -3   0    1.23    0.32 
  -9   3   0    0.86    0.19 
  -9   3   0    1.01    0.20 
   8  -3   0   10.62    0.52 
   8  -3   0   10.35    0.61 
  -8   3   0   11.44    0.46 
  -8   3   0   10.89    0.49 
  -8   3   0   11.07    0.49 
   7  -3   0    2.09    0.25 
   7  -3   0    1.95    0.29 
  -7   3   0    2.09    0.21 
  -7   3   0    2.22    0.21 
  -7   3   0    1.90    0.20 
   6  -3   0    1.59    0.21 
   6  -3   0    1.59    0.26 
  -6   3   0    1.44    0.17 
  -6   3   0    1.72    0.18 
  -6   3   0    1.83    0.17 
   5  -3   0   -0.03    0.13 
   5  -3   0    0.07    0.10 
  -5   3   0    0.00    0.07 
  -5   3   0    0.09    0.08 
  -5   3   0    0.08    0.07 
   4  -3   0    7.62    0.29 
   4  -3   0    6.51    0.34 
  -4   3   0    7.02    0.27 
  -4   3   0    7.04    0.26 
  -4   3   0    6.73    0.26 
   3  -3   0    0.93    0.11 
   3  -3   0    0.75    0.15 
   3  -3   0    0.62    0.09 
  -3   3   0    0.82    0.08 
  -3   3   0    0.76    0.10 
   2  -3   0    3.24    0.15 
   2  -3   0    3.30    0.20 
   2  -3   0    3.36    0.15 
  -2   3   0    2.97    0.12 
  -2   3   0    3.31    0.16 
   1  -3   0  919.38   18.97 
   1  -3   0  937.86   18.83 
   1  -3   0  922.12   18.63 
   1  -3   0 1000.00   18.79 
  -1   3   0  977.80   18.85 
   0  -3   0   34.23    0.78 
   0  -3   0   33.95    0.75 
   0  -3   0   35.30    0.75 
   0  -3   0   34.86    0.72 
   0   3   0   34.19    0.72 
  -1  -3   0    0.75    0.09 
  -1  -3   0    0.68    0.08 
  -1  -3   0    0.64    0.08 
   1   3   0    0.84    0.05 
   1   3   0    0.68    0.09 
  -2  -3   0   47.85    1.08 
  -2  -3   0   49.97    1.06 
  -2  -3   0   47.48    1.09 
   2   3   0   47.10    1.07 
  -3  -3   0   63.34    1.43 
  -3  -3   0   63.70    1.40 
  -3  -3   0   63.28    1.41 
   3   3   0   62.35    1.41 
  -4  -3   0   19.27    0.57 
  -4  -3   0   18.74    0.58 
   4   3   0   19.39    0.59 
  -5  -3   0    0.06    0.09 
  -5  -3   0   -0.03    0.08 
   5   3   0    0.06    0.10 
   5   3   0    0.04    0.12 
  -6  -3   0    2.30    0.24 
  -6  -3   0    2.00    0.23 
   6   3   0    1.42    0.22 
   6   3   0    2.39    0.28 
  -7  -3   0    3.21    0.29 
  -7  -3   0    3.00    0.28 
   7   3   0    2.97    0.34 
   7   3   0    3.32    0.33 
  -8  -3   0    0.77    0.18 
  -8  -3   0    0.70    0.18 
   8   3   0    0.50    0.22 
   8   3   0    0.66    0.20 
  -9  -3   0    5.68    0.43 
  -9  -3   0    6.08    0.44 
   9   3   0    6.10    0.52 
   9   3   0    7.29    0.52 
 -10  -3   0    0.32    0.17 
 -10  -3   0    0.19    0.17 
  10   3   0    0.35    0.21 
  10   3   0   -0.03    0.26 
  10  -4   0   -0.21    0.27 
 -10   4   0    0.18    0.13 
   9  -4   0    0.08    0.24 
   9  -4   0   -0.15    0.13 
  -9   4   0    0.18    0.13 
  -9   4   0   -0.05    0.12 
   8  -4   0    3.05    0.26 
   8  -4   0    2.19    0.35 
   8  -4   0    2.91    0.30 
  -8   4   0    3.00    0.27 
  -8   4   0    2.50    0.26 
   7  -4   0    0.22    0.10 
   7  -4   0   -0.07    0.11 
   7  -4   0    0.35    0.23 
  -7   4   0    0.25    0.10 
  -7   4   0    0.13    0.12 
   6  -4   0    4.75    0.37 
   6  -4   0    5.05    0.27 
   6  -4   0    4.47    0.29 
  -6   4   0    4.85    0.26 
  -6   4   0    4.73    0.28 
   5  -4   0    0.37    0.11 
   5  -4   0    0.27    0.16 
   5  -4   0    0.20    0.08 
  -5   4   0    0.18    0.08 
  -5   4   0    0.13    0.10 
   4  -4   0   18.09    0.50 
   4  -4   0   18.33    0.59 
   4  -4   0   18.30    0.51 
  -4   4   0   17.89    0.52 
  -4   4   0   17.82    0.48 
   3  -4   0    0.44    0.14 
   3  -4   0    0.62    0.09 
   3  -4   0    0.36    0.08 
  -3   4   0    0.39    0.09 
  -3   4   0    0.42    0.06 
   2  -4   0    6.73    0.24 
   2  -4   0    5.85    0.27 
   2  -4   0    6.40    0.22 
  -2   4   0    6.80    0.25 
  -2   4   0    6.46    0.19 
   1  -4   0   11.78    0.34 
   1  -4   0   11.62    0.38 
   1  -4   0   11.22    0.29 
   1  -4   0   11.69    0.32 
  -1   4   0   11.68    0.33 
   0  -4   0   60.64    1.28 
   0  -4   0   59.01    1.28 
   0  -4   0   59.59    1.23 
   0  -4   0   60.46    1.31 
   0   4   0   61.16    1.24 
  -1  -4   0    3.33    0.18 
  -1  -4   0    3.22    0.16 
  -1  -4   0    2.93    0.17 
   1   4   0    3.32    0.18 
   1   4   0    3.27    0.11 
  -2  -4   0    7.41    0.29 
  -2  -4   0    7.22    0.27 
  -2  -4   0    6.79    0.28 
   2   4   0    7.02    0.28 
  -3  -4   0    0.89    0.12 
  -3  -4   0    1.26    0.16 
  -3  -4   0    1.18    0.15 
   3   4   0    0.78    0.12 
  -4  -4   0    3.60    0.25 
  -4  -4   0    3.63    0.25 
  -4  -4   0    3.77    0.24 
   4   4   0    4.18    0.26 
  -5  -4   0    3.33    0.24 
  -5  -4   0    2.89    0.23 
   5   4   0    2.96    0.26 
   5   4   0    2.90    0.26 
  -6  -4   0    1.21    0.19 
  -6  -4   0    1.51    0.20 
   6   4   0    1.39    0.22 
   6   4   0    1.70    0.25 
  -7  -4   0    0.39    0.14 
  -7  -4   0    0.25    0.13 
   7   4   0    0.28    0.17 
   7   4   0    0.29    0.19 
  -8  -4   0    0.14    0.15 
  -8  -4   0    0.30    0.15 
   8   4   0    0.34    0.23 
   8   4   0    0.54    0.19 
  -9  -4   0    3.37    0.39 
  -9  -4   0    3.95    0.39 
   9   4   0    4.47    0.50 
   9   4   0    4.62    0.45 
  10  -5   0    0.72    0.35 
   9  -5   0   -0.02    0.27 
   9  -5   0   -0.09    0.18 
  -9   5   0   -0.27    0.11 
  -9   5   0    0.11    0.11 
   8  -5   0   -0.24    0.11 
   8  -5   0   -0.18    0.22 
   8  -5   0    0.15    0.11 
  -8   5   0    0.12    0.13 
  -8   5   0    0.11    0.10 
   7  -5   0    1.52    0.30 
   7  -5   0    1.07    0.18 
   7  -5   0    1.78    0.20 
  -7   5   0    1.38    0.17 
  -7   5   0    1.24    0.19 
   6  -5   0    0.04    0.17 
   6  -5   0    0.06    0.10 
   6  -5   0    0.15    0.09 
  -6   5   0    0.12    0.10 
  -6   5   0    0.00    0.06 
   5  -5   0   -0.07    0.07 
   5  -5   0    0.11    0.09 
   5  -5   0    0.24    0.18 
  -5   5   0   -0.06    0.06 
  -5   5   0   -0.02    0.11 
   4  -5   0    0.89    0.12 
   4  -5   0    1.05    0.13 
   4  -5   0    1.31    0.21 
  -4   5   0    1.14    0.15 
  -4   5   0    0.92    0.10 
   3  -5   0   21.03    0.54 
   3  -5   0   20.56    0.53 
   3  -5   0   20.06    0.62 
  -3   5   0   19.90    0.49 
  -3   5   0   20.44    0.56 
   2  -5   0   14.43    0.40 
   2  -5   0   14.38    0.47 
   2  -5   0   15.09    0.36 
   2  -5   0   13.90    0.41 
  -2   5   0   14.08    0.42 
   1  -5   0   73.73    1.61 
   1  -5   0   73.71    1.48 
   1  -5   0   72.99    1.55 
   1  -5   0   71.57    1.53 
  -1   5   0   72.89    1.53 
   0  -5   0    0.41    0.09 
   0  -5   0    0.59    0.10 
   0  -5   0    0.49    0.08 
   0  -5   0    0.48    0.10 
   0   5   0    0.49    0.07 
  -1  -5   0    4.65    0.23 
  -1  -5   0    4.92    0.20 
  -1  -5   0    4.95    0.24 
   1   5   0    5.02    0.16 
   1   5   0    4.88    0.23 
  -2  -5   0   17.51    0.49 
  -2  -5   0   16.88    0.53 
  -2  -5   0   16.02    0.50 
   2   5   0   16.76    0.51 
  -3  -5   0    0.07    0.08 
  -3  -5   0    0.12    0.09 
  -3  -5   0   -0.05    0.08 
   3   5   0    0.06    0.09 
  -4  -5   0    6.78    0.35 
  -4  -5   0    6.82    0.34 
  -4  -5   0    7.18    0.33 
   4   5   0    7.78    0.37 
  -5  -5   0    7.98    0.38 
  -5  -5   0    8.23    0.41 
  -5  -5   0    7.66    0.41 
   5   5   0    8.32    0.43 
  -6  -5   0   -0.09    0.11 
  -6  -5   0    0.04    0.11 
   6   5   0    0.01    0.13 
   6   5   0    0.09    0.11 
  -7  -5   0    2.38    0.30 
  -7  -5   0    2.73    0.31 
   7   5   0    1.90    0.30 
   7   5   0    2.75    0.34 
  -8  -5   0    0.87    0.22 
  -8  -5   0    1.01    0.23 
   8   5   0    0.74    0.23 
   8   5   0    1.10    0.30 
  -9  -5   0    1.51    0.27 
  -9  -5   0    1.82    0.30 
   9   5   0    1.97    0.33 
   9   5   0    2.28    0.37 
  10  -6   0    0.28    0.33 
 -10   6   0    0.56    0.20 
   9  -6   0    4.72    0.54 
  -9   6   0    3.62    0.34 
   8  -6   0    0.00    0.13 
   8  -6   0    0.20    0.26 
  -8   6   0    0.24    0.11 
  -8   6   0    0.13    0.13 
   7  -6   0    2.41    0.24 
   7  -6   0    2.32    0.34 
   7  -6   0    2.66    0.24 
  -7   6   0    2.43    0.20 
  -7   6   0    2.27    0.26 
   6  -6   0    0.05    0.17 
   6  -6   0    0.15    0.10 
   6  -6   0    0.12    0.10 
  -6   6   0    0.00    0.06 
  -6   6   0   -0.02    0.11 
   5  -6   0    0.21    0.09 
   5  -6   0    0.49    0.20 
   5  -6   0    0.25    0.11 
  -5   6   0    0.13    0.10 
  -5   6   0    0.08    0.07 
   4  -6   0    7.10    0.30 
   4  -6   0    6.98    0.28 
   4  -6   0    7.60    0.42 
  -4   6   0    7.47    0.26 
  -4   6   0    7.77    0.34 
   3  -6   0    9.88    0.43 
   3  -6   0   10.03    0.36 
   3  -6   0   10.24    0.34 
   3  -6   0    9.64    0.29 
  -3   6   0   10.15    0.37 
   2  -6   0  112.43    2.35 
   2  -6   0  112.40    2.45 
   2  -6   0  114.88    2.28 
   2  -6   0  113.75    2.34 
  -2   6   0  112.91    2.36 
   1  -6   0    4.17    0.17 
   1  -6   0    4.58    0.23 
   1  -6   0    4.15    0.26 
   1  -6   0    4.55    0.21 
  -1   6   0    4.56    0.21 
   0  -6   0    8.53    0.32 
   0  -6   0    8.28    0.35 
   0  -6   0    8.12    0.30 
   0  -6   0    8.54    0.27 
   0   6   0    8.28    0.26 
  -1  -6   0   12.70    0.44 
  -1  -6   0   12.75    0.42 
  -1  -6   0   12.47    0.38 
   1   6   0   12.67    0.42 
   1   6   0   12.87    0.33 
  -2  -6   0   19.29    0.61 
  -2  -6   0   19.04    0.59 
  -2  -6   0   19.74    0.55 
   2   6   0   19.04    0.59 
   2   6   0   19.41    0.41 
  -3  -6   0    1.00    0.16 
  -3  -6   0    0.76    0.13 
  -3  -6   0    0.81    0.16 
   3   6   0    0.70    0.14 
  -4  -6   0    0.00    0.10 
  -4  -6   0    0.08    0.08 
  -4  -6   0    0.14    0.10 
   4   6   0   -0.05    0.11 
  -5  -6   0    0.18    0.12 
  -5  -6   0    0.14    0.10 
  -5  -6   0    0.11    0.12 
   5   6   0    0.22    0.15 
  -6  -6   0    1.19    0.19 
  -6  -6   0    0.91    0.18 
   6   6   0    1.52    0.25 
   6   6   0    1.40    0.24 
  -7  -6   0    0.23    0.15 
  -7  -6   0    0.24    0.15 
   7   6   0    0.53    0.19 
   7   6   0    0.57    0.22 
  -8  -6   0    1.69    0.27 
  -8  -6   0    2.18    0.32 
   8   6   0    2.10    0.36 
   8   6   0    2.08    0.34 
  -9  -6   0    0.08    0.16 
  -9  -6   0   -0.04    0.15 
   9   6   0   -0.05    0.22 
  10  -7   0    0.04    0.32 
 -10   7   0   -0.11    0.16 
   9  -7   0    0.76    0.31 
  -9   7   0    0.34    0.19 
   8  -7   0   -0.03    0.25 
  -8   7   0    0.13    0.16 
   7  -7   0    0.29    0.13 
   7  -7   0    0.08    0.10 
   7  -7   0    0.14    0.23 
  -7   7   0    0.01    0.12 
   6  -7   0    1.80    0.19 
   6  -7   0    1.45    0.19 
   6  -7   0    1.46    0.28 
  -6   7   0    1.42    0.15 
  -6   7   0    1.51    0.21 
   5  -7   0    1.97    0.29 
   5  -7   0    1.86    0.18 
   5  -7   0    2.40    0.21 
  -5   7   0    2.28    0.16 
  -5   7   0    2.32    0.24 
   4  -7   0    1.28    0.15 
   4  -7   0    0.89    0.15 
   4  -7   0    0.91    0.10 
   4  -7   0    0.97    0.20 
  -4   7   0    0.90    0.16 
   3  -7   0    2.37    0.17 
   3  -7   0    1.83    0.23 
   3  -7   0    2.31    0.14 
   3  -7   0    2.02    0.19 
  -3   7   0    2.04    0.19 
   2  -7   0    6.00    0.28 
   2  -7   0    6.31    0.26 
   2  -7   0    6.35    0.22 
   2  -7   0    6.17    0.34 
  -2   7   0    6.08    0.27 
   1  -7   0   14.43    0.51 
   1  -7   0   13.19    0.44 
   1  -7   0   13.33    0.42 
   1  -7   0   13.26    0.37 
  -1   7   0   13.26    0.41 
   0  -7   0    0.16    0.08 
   0  -7   0    0.01    0.09 
   0  -7   0    0.17    0.10 
   0  -7   0    0.09    0.07 
   0   7   0    0.09    0.06 
  -1  -7   0    0.48    0.13 
  -1  -7   0    0.28    0.11 
  -1  -7   0    0.36    0.09 
   1   7   0    0.34    0.07 
   1   7   0    0.30    0.10 
  -2  -7   0    1.56    0.16 
  -2  -7   0    1.96    0.19 
  -2  -7   0    2.01    0.21 
   2   7   0    1.93    0.09 
   2   7   0    1.85    0.21 
  -3  -7   0    2.82    0.25 
  -3  -7   0    2.55    0.21 
  -3  -7   0    2.15    0.21 
   3   7   0    2.64    0.23 
  -4  -7   0   -0.05    0.09 
  -4  -7   0   -0.02    0.09 
  -4  -7   0   -0.02    0.10 
   4   7   0    0.01    0.11 
  -5  -7   0    0.10    0.10 
  -5  -7   0    0.18    0.12 
  -5  -7   0    0.06    0.11 
   5   7   0    0.18    0.15 
  -6  -7   0    0.08    0.13 
  -6  -7   0    0.11    0.13 
   6   7   0    0.33    0.16 
   6   7   0    0.14    0.15 
  -7  -7   0    0.17    0.16 
  -7  -7   0    0.13    0.15 
   7   7   0    0.37    0.19 
   7   7   0    0.74    0.22 
  -8  -7   0    6.41    0.49 
  -8  -7   0    6.41    0.47 
   8   7   0    7.34    0.52 
   8   7   0    6.45    0.54 
  10  -8   0   -0.18    0.30 
 -10   8   0   -0.05    0.18 
   9  -8   0    2.01    0.43 
  -9   8   0    1.69    0.26 
   8  -8   0    2.39    0.40 
  -8   8   0    2.05    0.27 
   7  -8   0   -0.10    0.19 
  -7   8   0    0.12    0.14 
   6  -8   0    0.27    0.14 
   6  -8   0    0.13    0.20 
   6  -8   0    0.28    0.11 
  -6   8   0    0.26    0.14 
   5  -8   0    4.19    0.39 
   5  -8   0    4.54    0.29 
   5  -8   0    4.20    0.24 
  -5   8   0    4.15    0.29 
   4  -8   0    5.27    0.39 
   4  -8   0    5.14    0.22 
   4  -8   0    5.47    0.30 
   4  -8   0    4.89    0.25 
  -4   8   0    5.47    0.32 
   3  -8   0    3.44    0.21 
   3  -8   0    3.61    0.25 
   3  -8   0    3.83    0.18 
   3  -8   0    3.93    0.31 
  -3   8   0    3.64    0.24 
   2  -8   0    0.06    0.12 
   2  -8   0    0.26    0.12 
   2  -8   0   -0.01    0.06 
   2  -8   0    0.23    0.09 
  -2   8   0    0.17    0.09 
   1  -8   0    0.01    0.07 
   1  -8   0    0.01    0.07 
   1  -8   0    0.01    0.10 
   1  -8   0    0.00    0.09 
  -1   8   0    0.01    0.08 
   0  -8   0    0.08    0.11 
   0  -8   0   -0.06    0.10 
   0  -8   0    0.01    0.07 
   0   8   0   -0.01    0.06 
   0   8   0    0.03    0.08 
  -1  -8   0   11.02    0.44 
  -1  -8   0   11.45    0.48 
  -1  -8   0   11.15    0.38 
   1   8   0   10.91    0.32 
   1   8   0   11.45    0.44 
  -2  -8   0    0.90    0.14 
  -2  -8   0    1.20    0.19 
  -2  -8   0    1.05    0.18 
   2   8   0    0.93    0.17 
  -3  -8   0    0.15    0.11 
  -3  -8   0    0.05    0.09 
  -3  -8   0    0.05    0.11 
   3   8   0    0.11    0.11 
  -4  -8   0    1.38    0.22 
  -4  -8   0    1.56    0.25 
  -4  -8   0    1.30    0.19 
   4   8   0    1.04    0.19 
  -5  -8   0   -0.07    0.11 
  -5  -8   0    0.34    0.14 
  -5  -8   0    0.06    0.11 
   5   8   0    0.18    0.16 
  -6  -8   0    0.00    0.12 
  -6  -8   0   -0.12    0.12 
  -6  -8   0    0.14    0.15 
   6   8   0    0.20    0.18 
  -7  -8   0    2.39    0.34 
  -7  -8   0    1.65    0.26 
   7   8   0    1.52    0.31 
   7   8   0    1.83    0.31 
  -8  -8   0    1.11    0.27 
  -8  -8   0    1.38    0.27 
   8   8   0    2.04    0.32 
   8   8   0    0.98    0.30 
   9  -9   0    1.63    0.38 
  -9   9   0    1.92    0.31 
   8  -9   0    0.98    0.30 
  -8   9   0    1.24    0.26 
   7  -9   0    0.01    0.21 
  -7   9   0   -0.17    0.14 
   6  -9   0    5.04    0.30 
   6  -9   0    5.83    0.49 
  -6   9   0    5.62    0.37 
   5  -9   0    7.34    0.34 
   5  -9   0    7.65    0.48 
   5  -9   0    8.17    0.40 
  -5   9   0    8.43    0.43 
   4  -9   0    0.32    0.14 
   4  -9   0    0.47    0.18 
   4  -9   0    0.33    0.10 
  -4   9   0    0.60    0.14 
   3  -9   0    6.47    0.30 
   3  -9   0    6.54    0.34 
   3  -9   0    6.31    0.40 
  -3   9   0    6.39    0.33 
   2  -9   0    6.97    0.26 
   2  -9   0    7.20    0.32 
   2  -9   0    7.42    0.35 
   2  -9   0    6.87    0.41 
  -2   9   0    7.54    0.33 
   1  -9   0    3.17    0.28 
   1  -9   0    3.46    0.19 
   1  -9   0    3.44    0.27 
   1  -9   0    3.38    0.23 
  -1   9   0    3.56    0.22 
   0  -9   0    7.66    0.40 
   0  -9   0    7.86    0.37 
   0  -9   0    7.10    0.29 
   0   9   0    7.30    0.29 
   0   9   0    7.73    0.35 
  -1  -9   0    0.74    0.16 
  -1  -9   0    0.70    0.17 
  -1  -9   0    0.96    0.14 
   1   9   0    1.17    0.18 
   1   9   0    0.66    0.09 
  -2  -9   0    0.25    0.13 
  -2  -9   0    0.35    0.13 
  -2  -9   0    0.11    0.10 
   2   9   0    0.55    0.15 
  -3  -9   0    0.16    0.11 
  -3  -9   0    0.17    0.13 
  -3  -9   0    0.11    0.11 
   3   9   0    0.14    0.12 
  -4  -9   0    0.53    0.16 
  -4  -9   0    0.53    0.17 
  -4  -9   0    0.50    0.14 
   4   9   0    0.56    0.18 
  -5  -9   0    0.41    0.17 
  -5  -9   0    0.16    0.15 
  -5  -9   0    0.20    0.13 
   5   9   0    0.44    0.17 
  -6  -9   0    0.49    0.19 
  -6  -9   0    0.33    0.17 
  -6  -9   0    0.47    0.17 
   6   9   0    0.92    0.25 
  -7  -9   0    0.04    0.14 
  -7  -9   0    0.23    0.17 
   7   9   0    0.34    0.21 
   7   9   0    0.09    0.15 
   9 -10   0    0.41    0.33 
  -9  10   0    0.71    0.24 
   8 -10   0    1.32    0.34 
  -8  10   0    0.92    0.23 
   7 -10   0    0.58    0.26 
  -7  10   0    0.52    0.20 
   6 -10   0   -0.17    0.18 
  -6  10   0    0.06    0.15 
   5 -10   0    0.15    0.15 
   5 -10   0    0.21    0.10 
   5 -10   0    0.32    0.21 
  -5  10   0    0.27    0.16 
   4 -10   0    2.07    0.32 
   4 -10   0    1.89    0.23 
   4 -10   0    2.02    0.19 
  -4  10   0    2.46    0.26 
   3 -10   0    3.11    0.27 
   3 -10   0    3.68    0.23 
   3 -10   0    3.06    0.31 
  -3  10   0    3.54    0.27 
   2 -10   0    0.00    0.13 
   2 -10   0    0.00    0.12 
   2 -10   0   -0.08    0.07 
  -2  10   0    0.01    0.09 
   1 -10   0    2.59    0.21 
   1 -10   0    2.13    0.27 
   1 -10   0    2.25    0.26 
   1 -10   0    2.14    0.24 
  -1  10   0    2.20    0.19 
   0 -10   0   -0.06    0.08 
   0 -10   0   -0.09    0.10 
   0 -10   0    0.05    0.12 
   0  10   0    0.06    0.08 
   0  10   0   -0.01    0.10 
  -1 -10   0   -0.05    0.10 
  -1 -10   0   -0.08    0.08 
  -1 -10   0   -0.06    0.11 
   1  10   0   -0.06    0.09 
  -2 -10   0    2.85    0.29 
  -2 -10   0    3.03    0.28 
  -2 -10   0    3.37    0.25 
   2  10   0    3.41    0.29 
  -3 -10   0    0.49    0.16 
  -3 -10   0    0.40    0.14 
  -3 -10   0    0.42    0.16 
   3  10   0    0.63    0.18 
  -4 -10   0    2.05    0.25 
  -4 -10   0    1.88    0.29 
  -4 -10   0    2.00    0.29 
   4  10   0    1.59    0.26 
  -5 -10   0    0.53    0.19 
  -5 -10   0    0.62    0.17 
  -5 -10   0    0.45    0.18 
   5  10   0    0.77    0.23 
  -6 -10   0   -0.01    0.13 
  -6 -10   0   -0.33    0.11 
  -6 -10   0    0.07    0.16 
   6  10   0    0.12    0.20 
  -7 -10   0    6.48    0.46 
  -7 -10   0    6.10    0.50 
   7  10   0    5.82    0.52 
   7  10   0    6.96    0.49 
   9 -11   0   -0.67    0.39 
  -9  11   0    0.02    0.23 
   8 -11   0   -0.11    0.25 
  -8  11   0   -0.24    0.13 
   7 -11   0   -0.10    0.20 
  -7  11   0    0.04    0.16 
   6 -11   0    0.11    0.22 
  -6  11   0   -0.11    0.14 
   5 -11   0    5.92    0.47 
  -5  11   0    5.98    0.40 
   4 -11   0    1.42    0.22 
   4 -11   0    1.31    0.27 
   4 -11   0    1.67    0.20 
  -4  11   0    1.47    0.22 
   3 -11   0    0.10    0.09 
   3 -11   0    0.01    0.13 
   3 -11   0   -0.13    0.12 
  -3  11   0    0.02    0.11 
   2 -11   0    1.97    0.22 
   2 -11   0    1.96    0.27 
   2 -11   0    2.30    0.26 
  -2  11   0    2.30    0.23 
   1 -11   0    0.28    0.14 
   1 -11   0    0.10    0.14 
  -1  11   0    0.26    0.11 
  -1  11   0    0.25    0.12 
   0 -11   0    1.03    0.22 
   0 -11   0    1.02    0.20 
   0  11   0    1.26    0.20 
   0  11   0    1.12    0.22 
  -1 -11   0    0.17    0.14 
  -1 -11   0   -0.16    0.08 
  -1 -11   0   -0.05    0.12 
   1  11   0    0.10    0.12 
  -2 -11   0    1.30    0.23 
  -2 -11   0    1.10    0.17 
  -2 -11   0    1.30    0.24 
   2  11   0    1.12    0.21 
  -3 -11   0    2.64    0.26 
  -3 -11   0    1.94    0.29 
  -3 -11   0    2.54    0.30 
   3  11   0    2.71    0.32 
  -4 -11   0    1.13    0.25 
  -4 -11   0    1.09    0.25 
  -4 -11   0    1.60    0.23 
   4  11   0    1.57    0.26 
  -5 -11   0    0.61    0.18 
  -5 -11   0    0.69    0.20 
  -5 -11   0    0.62    0.21 
   5  11   0    1.21    0.26 
  -6 -11   0    0.99    0.25 
  -6 -11   0    0.98    0.23 
  -6 -11   0    1.49    0.29 
   6  11   0    0.89    0.27 
   8 -12   0   -0.11    0.22 
  -8  12   0   -0.32    0.15 
   7 -12   0    0.12    0.22 
  -7  12   0   -0.11    0.16 
   6 -12   0    0.14    0.24 
  -6  12   0    0.02    0.15 
   5 -12   0   -0.21    0.17 
  -5  12   0   -0.21    0.11 
   4 -12   0    0.69    0.23 
   4 -12   0    0.54    0.26 
  -4  12   0    0.53    0.17 
   3 -12   0    1.09    0.21 
   3 -12   0    0.92    0.23 
   3 -12   0    1.45    0.19 
  -3  12   0    0.94    0.18 
   2 -12   0    2.62    0.24 
   2 -12   0    2.17    0.31 
   2 -12   0    2.05    0.26 
  -2  12   0    2.04    0.23 
   1 -12   0    1.90    0.25 
   1 -12   0    1.98    0.31 
  -1  12   0    1.36    0.17 
  -1  12   0    1.90    0.24 
   0 -12   0    0.28    0.14 
   0 -12   0    0.24    0.14 
   0  12   0    0.23    0.13 
  -1 -12   0    0.06    0.12 
  -1 -12   0   -0.12    0.11 
   1  12   0    0.00    0.12 
  -2 -12   0    0.38    0.18 
  -2 -12   0    0.19    0.14 
   2  12   0    0.31    0.14 
  -3 -12   0    8.88    0.62 
  -3 -12   0    8.24    0.53 
  -3 -12   0    7.83    0.51 
   3  12   0    8.72    0.50 
  -4 -12   0    0.09    0.14 
  -4 -12   0    0.26    0.16 
  -4 -12   0   -0.23    0.14 
   4  12   0    0.13    0.15 
  -5 -12   0    0.05    0.15 
  -5 -12   0    0.23    0.16 
  -5 -12   0    0.37    0.20 
   5  12   0    0.92    0.24 
   7 -13   0   -0.46    0.20 
  -7  13   0   -0.09    0.17 
   6 -13   0   -0.08    0.17 
  -6  13   0   -0.26    0.15 
   5 -13   0    0.15    0.18 
  -5  13   0   -0.01    0.15 
   4 -13   0    5.94    0.48 
  -4  13   0    6.43    0.42 
   3 -13   0    0.03    0.14 
   3 -13   0   -0.09    0.15 
  -3  13   0    0.03    0.13 
   2 -13   0   -0.29    0.13 
   2 -13   0   -0.22    0.11 
  -2  13   0    0.01    0.11 
  -2  13   0    0.15    0.11 
   1 -13   0    1.46    0.29 
   1 -13   0    1.25    0.23 
  -1  13   0    1.64    0.24 
   0 -13   0    0.08    0.13 
   0 -13   0    0.15    0.15 
   0  13   0    0.29    0.15 
  -1 -13   0    0.71    0.22 
  -1 -13   0    0.98    0.23 
   1  13   0    0.72    0.19 
  -2 -13   0    0.29    0.17 
  -2 -13   0   -0.04    0.13 
   2  13   0    0.07    0.13 
  -3 -13   0    0.49    0.20 
  -3 -13   0    0.41    0.20 
   3  13   0    0.69    0.21 
  -4 -13   0    0.30    0.17 
  -4 -13   0    0.35    0.19 
   4  13   0    0.61    0.21 
  -5 -13   0    0.38    0.20 
   6 -14   0    0.34    0.26 
  -6  14   0    0.49    0.23 
   5 -14   0    0.00    0.19 
  -5  14   0   -0.04    0.17 
   4 -14   0   -0.06    0.17 
  -4  14   0   -0.01    0.14 
   3 -14   0    0.74    0.23 
  -3  14   0    0.49    0.17 
   2 -14   0    1.76    0.34 
   2 -14   0    2.40    0.30 
   1 -14   0    2.01    0.34 
   1 -14   0    2.29    0.30 
  -1  14   0    1.52    0.23 
   0 -14   0   -0.16    0.14 
   0 -14   0   -0.09    0.11 
   0  14   0    0.11    0.13 
  -1 -14   0    0.48    0.20 
  -1 -14   0    0.22    0.18 
   1  14   0    0.43    0.17 
  -2 -14   0    1.45    0.30 
  -2 -14   0    1.86    0.31 
   2  14   0    2.03    0.29 
  -3 -14   0   -0.10    0.16 
  -3 -14   0   -0.12    0.13 
   3  14   0    0.30    0.17 
   5 -15   0   -0.15    0.19 
  -5  15   0    0.02    0.17 
   4 -15   0    1.46    0.34 
  -4  15   0    0.88    0.23 
   3 -15   0    0.11    0.19 
   2 -15   0   -0.14    0.15 
   1 -15   0   -0.03    0.17 
   1 -15   0   -0.28    0.13 
   0 -15   0   -0.01    0.16 
   0 -15   0    0.36    0.20 
   0  15   0    0.42    0.16 
  -1 -15   0    0.45    0.21 
  -1 -15   0    0.72    0.25 
   1  15   0    0.98    0.21 
  -2 -15   0    2.32    0.33 
  -2 -15   0    1.80    0.35 
   2  15   0    2.45    0.32 
   3 -16   0   -0.19    0.18 
   2 -16   0   -0.13    0.17 
   1 -16   0    0.10    0.19 
   0 -16   0    0.34    0.22 
   0 -16   0    0.05    0.18 
   0 -16   1    0.49    0.23 
   1 -16   1    0.43    0.24 
   2 -16   1    0.08    0.18 
   3 -16   1    0.02    0.20 
  -4  16  -1    0.70    0.22 
   2  15  -1    1.07    0.23 
  -2 -15   1    0.68    0.23 
  -2 -15   1    0.96    0.27 
   1  15  -1   -0.02    0.13 
  -1 -15   1   -0.07    0.15 
  -1 -15   1   -0.06    0.15 
   0  15  -1    0.19    0.14 
   0 -15   1   -0.13    0.15 
   0 -15   1    0.03    0.16 
  -1  15  -1    2.93    0.33 
   1 -15   1    2.88    0.41 
   1 -15   1    2.81    0.34 
   2 -15   1    0.23    0.20 
  -3  15  -1   -0.19    0.12 
   3 -15   1    0.00    0.18 
  -4  15  -1    0.10    0.16 
   4 -15   1    0.13    0.19 
  -5  15  -1   -0.08    0.18 
   5 -15   1   -0.02    0.21 
  -6  15  -1   -0.20    0.19 
   4  14  -1    1.16    0.26 
  -4 -14   1    0.51    0.22 
  -4 -14   1    0.59    0.22 
   3  14  -1    0.22    0.16 
  -3 -14   1   -0.18    0.15 
  -3 -14   1    0.09    0.16 
   2  14  -1    1.24    0.24 
  -2 -14   1    0.45    0.20 
  -2 -14   1    0.53    0.21 
   1  14  -1    1.91    0.28 
  -1 -14   1    1.54    0.27 
  -1 -14   1    1.40    0.29 
   0  14  -1    0.09    0.13 
   0 -14   1    0.25    0.17 
   0 -14   1    0.20    0.18 
  -1  14  -1    0.08    0.13 
   1 -14   1   -0.12    0.13 
   1 -14   1    0.10    0.14 
  -2  14  -1    0.06    0.13 
  -2  14  -1    0.29    0.21 
   2 -14   1    0.11    0.17 
   2 -14   1    0.00    0.15 
  -3  14  -1   -0.01    0.13 
   3 -14   1    0.00    0.17 
  -4  14  -1    1.34    0.25 
   4 -14   1    1.60    0.33 
  -5  14  -1    0.07    0.17 
   5 -14   1   -0.02    0.18 
  -6  14  -1    0.01    0.18 
   6 -14   1   -0.25    0.16 
  -7  14  -1   -0.02    0.20 
   5  13  -1    0.38    0.20 
  -5 -13   1    0.06    0.15 
  -5 -13   1    0.17    0.18 
   4  13  -1    0.41    0.19 
  -4 -13   1    0.23    0.16 
  -4 -13   1    0.12    0.16 
   3  13  -1    0.15    0.16 
  -3 -13   1    0.03    0.13 
  -3 -13   1    0.09    0.17 
   2  13  -1    0.18    0.15 
  -2 -13   1    0.07    0.15 
  -2 -13   1   -0.11    0.13 
   1  13  -1    1.51    0.25 
  -1 -13   1    1.10    0.26 
  -1 -13   1    0.87    0.21 
   0  13  -1   -0.01    0.12 
   0 -13   1   -0.01    0.12 
   0 -13   1    0.06    0.14 
  -1  13  -1    4.50    0.33 
   1 -13   1    4.16    0.33 
   1 -13   1    3.56    0.37 
  -2  13  -1    1.64    0.22 
   2 -13   1    1.19    0.22 
   2 -13   1    1.35    0.20 
   2 -13   1    1.37    0.28 
  -3  13  -1    1.23    0.21 
   3 -13   1    0.75    0.24 
   3 -13   1    1.19    0.19 
  -4  13  -1    3.11    0.32 
   4 -13   1    3.68    0.39 
  -5  13  -1    0.16    0.16 
   5 -13   1    0.30    0.21 
  -6  13  -1    0.06    0.17 
   6 -13   1   -0.07    0.18 
  -7  13  -1    0.11    0.17 
   7 -13   1   -0.06    0.23 
  -6 -12   1    0.86    0.22 
  -6 -12   1    0.82    0.25 
   5  12  -1    0.73    0.23 
  -5 -12   1    0.47    0.19 
  -5 -12   1    0.08    0.15 
  -5 -12   1    0.50    0.18 
   4  12  -1    0.42    0.18 
  -4 -12   1    0.16    0.14 
  -4 -12   1   -0.01    0.16 
  -4 -12   1   -0.01    0.13 
   3  12  -1    0.87    0.22 
  -3 -12   1    1.00    0.23 
  -3 -12   1    0.71    0.20 
   2  12  -1    0.22    0.16 
  -2 -12   1    0.20    0.15 
  -2 -12   1    0.27    0.16 
   1  12  -1    0.27    0.14 
  -1 -12   1   -0.03    0.12 
  -1 -12   1   -0.04    0.11 
   0  12  -1    0.09    0.12 
   0 -12   1   -0.17    0.10 
   0 -12   1   -0.11    0.10 
  -1  12  -1    1.62    0.19 
  -1  12  -1    1.81    0.23 
   1 -12   1    1.76    0.30 
   1 -12   1    1.29    0.21 
  -2  12  -1    0.04    0.11 
   2 -12   1    0.02    0.13 
   2 -12   1   -0.01    0.09 
   2 -12   1   -0.10    0.12 
  -3  12  -1    1.16    0.20 
   3 -12   1    0.83    0.16 
   3 -12   1    1.02    0.19 
   3 -12   1    0.96    0.23 
  -4  12  -1   -0.06    0.12 
   4 -12   1   -0.11    0.08 
   4 -12   1   -0.13    0.14 
  -5  12  -1    0.06    0.16 
   5 -12   1    0.20    0.20 
  -6  12  -1    0.46    0.20 
   6 -12   1    0.29    0.25 
  -7  12  -1   -0.01    0.17 
   7 -12   1   -0.13    0.20 
  -8  12  -1   -0.02    0.16 
   8 -12   1   -0.19    0.23 
   6  11  -1    0.85    0.26 
  -6 -11   1    0.79    0.20 
  -6 -11   1    0.72    0.22 
  -6 -11   1    0.53    0.20 
   5  11  -1    1.20    0.27 
  -5 -11   1    0.78    0.20 
  -5 -11   1    0.48    0.21 
  -5 -11   1    0.32    0.16 
   4  11  -1    4.63    0.39 
  -4 -11   1    4.17    0.33 
  -4 -11   1    4.21    0.37 
  -4 -11   1    3.93    0.38 
   3  11  -1    0.21    0.15 
  -3 -11   1    0.06    0.11 
  -3 -11   1    0.15    0.13 
  -3 -11   1    0.15    0.13 
   2  11  -1    2.47    0.28 
  -2 -11   1    2.34    0.27 
  -2 -11   1    2.49    0.22 
  -2 -11   1    2.62    0.33 
   1  11  -1    1.08    0.19 
  -1 -11   1    1.33    0.24 
  -1 -11   1    1.09    0.20 
  -1 -11   1    1.20    0.20 
   0  11  -1    0.04    0.08 
   0  11  -1   -0.04    0.11 
   0 -11   1    0.05    0.12 
   0 -11   1   -0.11    0.11 
  -1  11  -1    6.88    0.33 
   1 -11   1    7.24    0.45 
   1 -11   1    6.69    0.35 
   1 -11   1    6.76    0.38 
  -2  11  -1    0.12    0.11 
   2 -11   1   -0.01    0.11 
   2 -11   1    0.12    0.10 
   2 -11   1    0.08    0.13 
  -3  11  -1   -0.01    0.11 
   3 -11   1   -0.09    0.11 
   3 -11   1   -0.10    0.14 
   3 -11   1   -0.02    0.08 
  -4  11  -1    0.33    0.15 
   4 -11   1    0.28    0.15 
   4 -11   1    0.19    0.10 
   4 -11   1    0.50    0.21 
  -5  11  -1   -0.02    0.14 
   5 -11   1   -0.04    0.09 
   5 -11   1   -0.14    0.15 
  -6  11  -1    0.57    0.18 
   6 -11   1    0.66    0.27 
  -7  11  -1    0.48    0.19 
   7 -11   1    0.88    0.32 
  -8  11  -1    0.06    0.18 
   8 -11   1    0.49    0.28 
  -9  11  -1    0.21    0.22 
   9 -11   1   -0.06    0.24 
   7  10  -1    8.39    0.60 
   7  10  -1   10.34    0.61 
  -7 -10   1    8.87    0.57 
  -7 -10   1    7.35    0.51 
   6  10  -1    1.02    0.27 
  -6 -10   1    1.39    0.28 
  -6 -10   1    1.22    0.24 
  -6 -10   1    0.98    0.24 
   5  10  -1    0.39    0.20 
  -5 -10   1    0.15    0.16 
  -5 -10   1    0.12    0.14 
  -5 -10   1    0.08    0.13 
   4  10  -1    8.32    0.48 
  -4 -10   1    8.12    0.48 
  -4 -10   1    8.31    0.42 
  -4 -10   1    8.54    0.50 
   3  10  -1    0.04    0.11 
  -3 -10   1    0.14    0.14 
  -3 -10   1    0.02    0.10 
  -3 -10   1   -0.07    0.10 
   2  10  -1    1.15    0.20 
  -2 -10   1    1.86    0.25 
  -2 -10   1    1.25    0.20 
  -2 -10   1    1.29    0.16 
   1  10  -1   -0.03    0.10 
  -1 -10   1   -0.05    0.07 
  -1 -10   1    0.14    0.12 
  -1 -10   1   -0.04    0.11 
   0  10  -1    0.55    0.14 
   0  10  -1    0.40    0.09 
   0 -10   1    0.45    0.16 
   0 -10   1    0.44    0.10 
   0 -10   1    0.47    0.14 
  -1  10  -1    0.14    0.09 
   1 -10   1    0.07    0.13 
   1 -10   1   -0.07    0.07 
   1 -10   1   -0.15    0.09 
  -2  10  -1    0.87    0.15 
   2 -10   1    0.76    0.19 
   2 -10   1    1.01    0.16 
   2 -10   1    1.04    0.17 
  -3  10  -1   11.35    0.45 
   3 -10   1   11.09    0.54 
   3 -10   1   11.33    0.43 
   3 -10   1   10.88    0.44 
  -4  10  -1    0.00    0.10 
   4 -10   1    0.10    0.15 
   4 -10   1    0.04    0.09 
   4 -10   1   -0.30    0.10 
  -5  10  -1    3.44    0.32 
   5 -10   1    3.84    0.25 
   5 -10   1    3.42    0.36 
  -6  10  -1    1.39    0.23 
   6 -10   1    1.42    0.20 
   6 -10   1    1.10    0.29 
  -7  10  -1    0.22    0.18 
   7 -10   1    0.05    0.24 
  -8  10  -1    0.00    0.17 
   8 -10   1    0.12    0.27 
  -9  10  -1   -0.14    0.16 
   9 -10   1   -0.56    0.24 
   8   9  -1    1.33    0.24 
  -8  -9   1    0.58    0.23 
   7   9  -1    0.41    0.23 
   7   9  -1    0.59    0.21 
  -7  -9   1    0.05    0.15 
  -7  -9   1    0.04    0.16 
   6   9  -1    0.90    0.25 
  -6  -9   1    0.40    0.17 
  -6  -9   1    0.33    0.18 
  -6  -9   1    0.24    0.16 
   5   9  -1    0.72    0.21 
  -5  -9   1    0.40    0.17 
  -5  -9   1    0.77    0.20 
  -5  -9   1    0.54    0.16 
   4   9  -1    5.55    0.38 
  -4  -9   1    5.37    0.33 
  -4  -9   1    5.48    0.39 
  -4  -9   1    5.36    0.38 
   3   9  -1    3.35    0.29 
  -3  -9   1    3.36    0.25 
  -3  -9   1    3.64    0.30 
  -3  -9   1    3.32    0.29 
   2   9  -1   -0.08    0.08 
  -2  -9   1    0.01    0.08 
  -2  -9   1    0.05    0.10 
  -2  -9   1   -0.03    0.09 
   1   9  -1    0.38    0.08 
   1   9  -1    0.36    0.13 
  -1  -9   1    0.39    0.12 
  -1  -9   1    0.56    0.11 
  -1  -9   1    0.31    0.13 
   0   9  -1    0.02    0.07 
   0  -9   1    0.10    0.09 
   0  -9   1    0.06    0.12 
   0  -9   1    0.05    0.07 
   0  -9   1    0.06    0.10 
  -1   9  -1    0.45    0.11 
   1  -9   1    0.62    0.17 
   1  -9   1    0.69    0.13 
   1  -9   1    0.43    0.13 
   1  -9   1    0.63    0.09 
  -2   9  -1    0.06    0.10 
   2  -9   1   -0.15    0.09 
   2  -9   1   -0.02    0.10 
   2  -9   1   -0.04    0.08 
  -3   9  -1    3.47    0.25 
   3  -9   1    2.87    0.29 
   3  -9   1    3.29    0.25 
   3  -9   1    3.22    0.22 
  -4   9  -1    0.70    0.16 
   4  -9   1    0.75    0.15 
   4  -9   1    0.48    0.18 
   4  -9   1    0.84    0.14 
  -5   9  -1    0.19    0.14 
   5  -9   1    0.14    0.10 
   5  -9   1    0.22    0.14 
   5  -9   1    0.02    0.16 
  -6   9  -1    0.37    0.17 
   6  -9   1    0.15    0.10 
   6  -9   1    0.49    0.21 
  -7   9  -1   -0.08    0.15 
   7  -9   1   -0.07    0.20 
  -8   9  -1   -0.01    0.17 
   8  -9   1   -0.34    0.24 
  -9   9  -1    2.13    0.30 
   9  -9   1    1.89    0.41 
   8   8  -1    0.92    0.29 
   8   8  -1    1.03    0.25 
  -8  -8   1    1.12    0.26 
  -8  -8   1    1.38    0.25 
   7   8  -1    0.52    0.22 
   7   8  -1    0.29    0.22 
  -7  -8   1    0.11    0.16 
  -7  -8   1    0.41    0.16 
   6   8  -1    0.71    0.21 
  -6  -8   1    1.18    0.22 
  -6  -8   1    0.73    0.20 
  -6  -8   1    0.98    0.23 
   5   8  -1    0.10    0.14 
  -5  -8   1    0.08    0.11 
  -5  -8   1   -0.02    0.12 
  -5  -8   1    0.16    0.12 
   4   8  -1    4.35    0.32 
  -4  -8   1    4.39    0.33 
  -4  -8   1    3.80    0.28 
  -4  -8   1    4.26    0.33 
   3   8  -1    0.24    0.13 
  -3  -8   1    0.35    0.13 
  -3  -8   1    0.33    0.13 
  -3  -8   1    0.29    0.11 
   2   8  -1    0.98    0.16 
  -2  -8   1    1.29    0.20 
  -2  -8   1    1.13    0.18 
  -2  -8   1    0.78    0.12 
   1   8  -1    5.21    0.20 
   1   8  -1    4.74    0.27 
  -1  -8   1    5.03    0.32 
  -1  -8   1    4.81    0.28 
  -1  -8   1    4.77    0.23 
   0   8  -1   33.77    0.81 
   0  -8   1   34.07    0.88 
   0  -8   1   34.16    0.96 
   0  -8   1   33.93    0.88 
   0  -8   1   35.04    0.80 
  -1   8  -1    0.05    0.08 
   1  -8   1    0.14    0.08 
   1  -8   1    0.24    0.07 
   1  -8   1   -0.16    0.08 
   1  -8   1    0.06    0.10 
  -2   8  -1    0.29    0.11 
   2  -8   1    0.47    0.12 
   2  -8   1    0.51    0.16 
   2  -8   1    0.48    0.08 
   2  -8   1    0.41    0.10 
  -3   8  -1    0.28    0.11 
   3  -8   1    0.25    0.11 
   3  -8   1    0.36    0.07 
   3  -8   1    0.34    0.16 
   3  -8   1    0.20    0.09 
  -4   8  -1    0.81    0.15 
   4  -8   1    0.91    0.14 
   4  -8   1    1.00    0.16 
   4  -8   1    1.02    0.20 
  -5   8  -1    1.21    0.19 
   5  -8   1    1.50    0.26 
   5  -8   1    1.47    0.18 
   5  -8   1    1.80    0.21 
  -6   8  -1    0.32    0.14 
   6  -8   1    0.39    0.14 
   6  -8   1    0.13    0.18 
   6  -8   1    0.25    0.11 
  -7   8  -1    0.05    0.15 
   7  -8   1   -0.28    0.21 
   7  -8   1   -0.08    0.09 
  -8   8  -1   -0.10    0.15 
   8  -8   1   -0.23    0.24 
  -9   8  -1   -0.35    0.13 
   9  -8   1    0.24    0.27 
 -10   8  -1    0.25    0.20 
  10  -8   1    0.16    0.32 
   8   7  -1   13.38    0.71 
   8   7  -1   13.39    0.71 
  -8  -7   1   12.36    0.67 
  -8  -7   1   12.64    0.64 
   7   7  -1    4.12    0.39 
   7   7  -1    4.22    0.45 
  -7  -7   1    3.87    0.34 
  -7  -7   1    3.75    0.35 
   6   7  -1    0.70    0.19 
   6   7  -1    0.62    0.21 
  -6  -7   1    0.45    0.16 
  -6  -7   1    0.38    0.15 
   5   7  -1    3.20    0.29 
  -5  -7   1    3.65    0.28 
  -5  -7   1    3.40    0.30 
  -5  -7   1    3.41    0.30 
   4   7  -1    1.41    0.21 
  -4  -7   1    1.69    0.19 
  -4  -7   1    1.44    0.21 
  -4  -7   1    1.58    0.22 
   3   7  -1    6.61    0.34 
  -3  -7   1    6.67    0.31 
  -3  -7   1    6.15    0.35 
  -3  -7   1    6.31    0.35 
   2   7  -1    4.54    0.28 
   2   7  -1    4.69    0.14 
  -2  -7   1    4.66    0.27 
  -2  -7   1    4.78    0.30 
  -2  -7   1    5.06    0.25 
   1   7  -1    0.03    0.05 
   1   7  -1    0.04    0.08 
  -1  -7   1    0.11    0.09 
  -1  -7   1    0.14    0.09 
  -1  -7   1    0.06    0.07 
   0   7  -1    0.06    0.06 
   0  -7   1   -0.03    0.05 
   0  -7   1   -0.11    0.06 
   0  -7   1    0.05    0.08 
   0  -7   1    0.05    0.08 
  -1   7  -1    0.71    0.10 
   1  -7   1    0.67    0.11 
   1  -7   1    0.64    0.08 
   1  -7   1    0.74    0.14 
   1  -7   1    0.72    0.12 
  -2   7  -1   11.98    0.40 
   2  -7   1   12.33    0.39 
   2  -7   1   11.28    0.46 
   2  -7   1   12.45    0.31 
   2  -7   1   12.17    0.40 
  -3   7  -1    0.02    0.10 
   3  -7   1    0.05    0.12 
   3  -7   1    0.20    0.05 
   3  -7   1   -0.01    0.10 
   3  -7   1    0.04    0.07 
  -4   7  -1    0.22    0.10 
   4  -7   1    0.02    0.05 
   4  -7   1    0.06    0.08 
   4  -7   1    0.01    0.10 
   4  -7   1   -0.01    0.13 
  -5   7  -1    0.65    0.09 
  -5   7  -1    0.51    0.15 
   5  -7   1    0.68    0.20 
   5  -7   1    0.69    0.14 
   5  -7   1    0.69    0.13 
  -6   7  -1    0.94    0.13 
  -6   7  -1    0.60    0.15 
   6  -7   1    1.55    0.30 
   6  -7   1    0.63    0.14 
   6  -7   1    0.91    0.15 
  -7   7  -1    0.11    0.15 
   7  -7   1    0.06    0.10 
   7  -7   1    0.11    0.20 
  -8   7  -1    6.57    0.42 
   8  -7   1    5.46    0.53 
   8  -7   1    6.01    0.37 
  -9   7  -1    0.96    0.22 
   9  -7   1    0.80    0.34 
 -10   7  -1    0.18    0.17 
  10  -7   1   -0.09    0.29 
   9   6  -1    0.52    0.21 
   9   6  -1    0.21    0.25 
  -9  -6   1   -0.15    0.14 
  -9  -6   1    0.19    0.16 
   8   6  -1    2.47    0.36 
   8   6  -1    2.32    0.35 
  -8  -6   1    2.22    0.32 
  -8  -6   1    1.89    0.30 
   7   6  -1    1.71    0.28 
   7   6  -1    1.95    0.30 
  -7  -6   1    1.39    0.23 
  -7  -6   1    1.30    0.25 
   6   6  -1    3.05    0.33 
   6   6  -1    2.49    0.31 
  -6  -6   1    2.71    0.29 
  -6  -6   1    3.17    0.31 
   5   6  -1    3.30    0.29 
  -5  -6   1    3.69    0.27 
  -5  -6   1    3.50    0.29 
  -5  -6   1    3.27    0.28 
   4   6  -1    2.51    0.24 
  -4  -6   1    2.59    0.23 
  -4  -6   1    2.65    0.24 
  -4  -6   1    1.97    0.20 
   3   6  -1    4.27    0.26 
  -3  -6   1    3.93    0.24 
  -3  -6   1    3.85    0.26 
  -3  -6   1    3.88    0.26 
   2   6  -1    0.01    0.02 
   2   6  -1   -0.05    0.07 
  -2  -6   1    0.04    0.08 
  -2  -6   1    0.03    0.07 
  -2  -6   1   -0.01    0.07 
   1   6  -1    2.26    0.11 
   1   6  -1    2.34    0.18 
  -1  -6   1    2.33    0.15 
  -1  -6   1    2.25    0.18 
  -1  -6   1    2.33    0.18 
   0   6  -1   21.03    0.51 
   0  -6   1   20.76    0.57 
   0  -6   1   20.89    0.61 
   0  -6   1   21.95    0.57 
   0  -6   1   20.62    0.50 
  -1   6  -1   26.71    0.66 
   1  -6   1   27.89    0.75 
   1  -6   1   27.67    0.60 
   1  -6   1   28.37    0.69 
   1  -6   1   27.16    0.68 
  -2   6  -1   10.37    0.36 
   2  -6   1   10.49    0.34 
   2  -6   1   11.03    0.28 
   2  -6   1   11.10    0.43 
   2  -6   1   10.47    0.35 
  -3   6  -1    0.21    0.09 
   3  -6   1    0.28    0.08 
   3  -6   1    0.32    0.10 
   3  -6   1    0.34    0.06 
   3  -6   1    0.21    0.13 
  -4   6  -1    2.39    0.14 
  -4   6  -1    2.29    0.20 
   4  -6   1    2.37    0.18 
   4  -6   1    2.38    0.27 
   4  -6   1    2.42    0.18 
  -5   6  -1   -0.14    0.10 
  -5   6  -1    0.06    0.05 
   5  -6   1    0.03    0.09 
   5  -6   1    0.05    0.08 
   5  -6   1    0.23    0.17 
  -6   6  -1    1.24    0.14 
  -6   6  -1    1.15    0.19 
   6  -6   1    1.46    0.17 
   6  -6   1    1.28    0.18 
   6  -6   1    1.40    0.27 
  -7   6  -1    7.76    0.34 
  -7   6  -1    7.15    0.38 
   7  -6   1    7.20    0.38 
   7  -6   1    7.61    0.53 
   7  -6   1    7.60    0.35 
  -8   6  -1    1.01    0.20 
  -8   6  -1    1.31    0.21 
   8  -6   1    1.26    0.22 
   8  -6   1    1.32    0.31 
  -9   6  -1    0.07    0.16 
   9  -6   1    0.09    0.27 
   9  -6   1    0.57    0.29 
 -10   6  -1    0.18    0.18 
  10  -6   1    0.29    0.32 
   9   5  -1    2.01    0.37 
   9   5  -1    2.99    0.39 
  -9  -5   1    2.33    0.32 
  -9  -5   1    2.53    0.35 
   8   5  -1    3.17    0.38 
   8   5  -1    3.10    0.38 
  -8  -5   1    3.58    0.35 
  -8  -5   1    2.92    0.33 
   7   5  -1    4.22    0.37 
   7   5  -1    4.64    0.39 
  -7  -5   1    4.28    0.34 
  -7  -5   1    4.02    0.33 
   6   5  -1    4.07    0.33 
   6   5  -1    4.41    0.35 
  -6  -5   1    4.04    0.31 
  -6  -5   1    4.52    0.33 
   5   5  -1    5.67    0.34 
  -5  -5   1    6.22    0.37 
  -5  -5   1    5.92    0.33 
  -5  -5   1    6.15    0.34 
   4   5  -1    1.02    0.16 
  -4  -5   1    1.28    0.16 
  -4  -5   1    0.99    0.16 
  -4  -5   1    1.30    0.18 
   3   5  -1    0.87    0.13 
  -3  -5   1    0.82    0.13 
  -3  -5   1    1.15    0.14 
  -3  -5   1    0.91    0.14 
   2   5  -1   33.50    0.86 
  -2  -5   1   34.63    0.89 
  -2  -5   1   35.42    0.82 
   1   5  -1   17.95    0.40 
   1   5  -1   17.65    0.49 
  -1  -5   1   17.26    0.52 
  -1  -5   1   17.58    0.45 
  -1  -5   1   17.40    0.49 
   0   5  -1   57.56    1.20 
   0  -5   1   55.95    1.29 
   0  -5   1   58.13    1.19 
   0  -5   1   57.21    1.24 
   0  -5   1   57.57    1.25 
  -1   5  -1    1.05    0.11 
   1  -5   1    1.17    0.08 
   1  -5   1    0.97    0.11 
   1  -5   1    1.27    0.15 
   1  -5   1    1.11    0.11 
  -2   5  -1    0.11    0.08 
   2  -5   1    0.25    0.08 
   2  -5   1    0.24    0.12 
   2  -5   1    0.24    0.07 
   2  -5   1    0.20    0.04 
  -3   5  -1   28.83    0.75 
  -3   5  -1   31.16    0.68 
   3  -5   1   30.73    0.74 
   3  -5   1   30.40    0.83 
   3  -5   1   31.04    0.72 
  -4   5  -1    0.78    0.09 
  -4   5  -1    0.53    0.12 
   4  -5   1    0.75    0.11 
   4  -5   1    0.73    0.12 
   4  -5   1    0.90    0.19 
  -5   5  -1    0.61    0.14 
  -5   5  -1    0.48    0.09 
   5  -5   1    0.46    0.10 
   5  -5   1    0.53    0.12 
   5  -5   1    0.51    0.18 
  -6   5  -1    0.19    0.08 
  -6   5  -1    0.07    0.10 
   6  -5   1    0.16    0.11 
   6  -5   1    0.13    0.09 
   6  -5   1   -0.04    0.16 
  -7   5  -1    0.07    0.12 
  -7   5  -1    0.08    0.08 
   7  -5   1   -0.01    0.11 
   7  -5   1   -0.29    0.16 
   7  -5   1    0.05    0.08 
  -8   5  -1    0.32    0.12 
  -8   5  -1    0.40    0.15 
   8  -5   1    0.31    0.26 
   8  -5   1    0.10    0.14 
  -9   5  -1   -0.06    0.12 
  -9   5  -1    0.06    0.10 
   9  -5   1   -0.12    0.25 
   9  -5   1   -0.26    0.13 
  10  -5   1    0.11    0.32 
  10   4  -1   -0.28    0.22 
 -10  -4   1    0.12    0.15 
   9   4  -1    9.12    0.60 
   9   4  -1    9.04    0.60 
  -9  -4   1    9.51    0.55 
  -9  -4   1    8.85    0.55 
   8   4  -1   -0.15    0.14 
   8   4  -1    0.47    0.20 
  -8  -4   1    0.10    0.14 
  -8  -4   1    0.03    0.13 
   7   4  -1    0.58    0.20 
   7   4  -1    0.68    0.19 
  -7  -4   1    0.54    0.17 
  -7  -4   1    0.52    0.16 
   6   4  -1    3.08    0.29 
   6   4  -1    2.57    0.28 
  -6  -4   1    3.28    0.28 
  -6  -4   1    2.85    0.27 
   5   4  -1    0.26    0.15 
   5   4  -1    0.22    0.13 
  -5  -4   1    0.33    0.12 
  -5  -4   1    0.34    0.12 
   4   4  -1   34.35    0.93 
  -4  -4   1   36.69    0.91 
  -4  -4   1   35.02    0.93 
  -4  -4   1   35.82    0.96 
   3   4  -1    1.45    0.16 
  -3  -4   1    1.57    0.14 
  -3  -4   1    1.80    0.17 
  -3  -4   1    1.64    0.17 
   2   4  -1    0.79    0.11 
  -2  -4   1    0.69    0.10 
  -2  -4   1    0.61    0.11 
  -2  -4   1    0.75    0.10 
   1   4  -1    2.86    0.16 
   1   4  -1    2.91    0.10 
  -1  -4   1    2.98    0.17 
  -1  -4   1    2.84    0.17 
  -1  -4   1    2.66    0.14 
   0   4  -1   28.73    0.61 
   0  -4   1   27.79    0.68 
   0  -4   1   28.01    0.65 
   0  -4   1   27.98    0.60 
   0  -4   1   26.91    0.64 
  -1   4  -1   10.94    0.32 
   1  -4   1   11.23    0.31 
   1  -4   1   11.76    0.37 
   1  -4   1   12.02    0.33 
   1  -4   1   11.54    0.26 
  -2   4  -1    7.28    0.26 
  -2   4  -1    7.83    0.20 
   2  -4   1    7.93    0.26 
   2  -4   1    8.05    0.31 
   2  -4   1    7.80    0.25 
  -3   4  -1    1.25    0.09 
  -3   4  -1    1.11    0.12 
   3  -4   1    1.03    0.10 
   3  -4   1    1.25    0.17 
   3  -4   1    1.15    0.12 
  -4   4  -1    0.85    0.10 
  -4   4  -1    0.75    0.11 
   4  -4   1    0.97    0.11 
   4  -4   1    0.65    0.15 
   4  -4   1    1.10    0.14 
  -5   4  -1   12.85    0.42 
  -5   4  -1   13.60    0.46 
   5  -4   1   13.90    0.46 
   5  -4   1   13.87    0.55 
   5  -4   1   13.57    0.43 
  -6   4  -1    1.94    0.17 
  -6   4  -1    2.40    0.22 
   6  -4   1    2.24    0.18 
   6  -4   1    2.43    0.31 
   6  -4   1    2.36    0.23 
  -7   4  -1    4.14    0.28 
  -7   4  -1    4.55    0.27 
   7  -4   1    4.60    0.27 
   7  -4   1    4.69    0.42 
   7  -4   1    3.93    0.30 
  -8   4  -1    0.16    0.10 
  -8   4  -1    0.13    0.13 
   8  -4   1    0.03    0.14 
   8  -4   1    0.02    0.20 
   8  -4   1    0.22    0.11 
  -9   4  -1    0.03    0.11 
  -9   4  -1   -0.01    0.11 
   9  -4   1   -0.04    0.15 
   9  -4   1    0.25    0.24 
 -10   4  -1    0.05    0.12 
  10  -4   1   -0.06    0.25 
  10  -4   1   -0.23    0.16 
  10   3  -1   -0.15    0.25 
  10   3  -1    0.51    0.23 
 -10  -3   1    0.34    0.18 
 -10  -3   1    0.18    0.16 
   9   3  -1    3.62    0.43 
   9   3  -1    2.16    0.36 
  -9  -3   1    2.14    0.29 
  -9  -3   1    2.03    0.30 
   8   3  -1    2.36    0.33 
   8   3  -1    1.63    0.28 
  -8  -3   1    1.52    0.23 
  -8  -3   1    1.61    0.25 
   7   3  -1    0.29    0.17 
   7   3  -1    0.24    0.18 
  -7  -3   1    0.52    0.16 
  -7  -3   1    0.56    0.16 
   6   3  -1    0.04    0.12 
   6   3  -1    0.11    0.15 
  -6  -3   1   -0.02    0.09 
  -6  -3   1   -0.03    0.10 
   5   3  -1    4.61    0.30 
   5   3  -1    4.31    0.30 
  -5  -3   1    3.94    0.27 
  -5  -3   1    4.20    0.27 
   4   3  -1    3.39    0.23 
  -4  -3   1    3.72    0.24 
  -4  -3   1    3.59    0.22 
  -4  -3   1    3.61    0.25 
   3   3  -1   -0.06    0.06 
  -3  -3   1    0.02    0.07 
  -3  -3   1   -0.02    0.06 
  -3  -3   1    0.08    0.07 
   2   3  -1    4.15    0.20 
  -2  -3   1    4.07    0.21 
  -2  -3   1    4.28    0.19 
  -2  -3   1    4.54    0.21 
   1   3  -1    0.20    0.06 
   1   3  -1    0.16    0.03 
  -1  -3   1    0.11    0.06 
  -1  -3   1    0.15    0.05 
  -1  -3   1    0.15    0.07 
   0   3  -1    0.80    0.07 
   0  -3   1    0.84    0.09 
   0  -3   1    0.84    0.06 
   0  -3   1    0.68    0.08 
   0  -3   1    0.80    0.08 
  -1   3  -1  136.97    2.79 
   1  -3   1  142.68    2.77 
   1  -3   1  141.34    2.83 
   1  -3   1  141.09    2.76 
   1  -3   1  139.92    2.79 
  -2   3  -1    2.72    0.11 
  -2   3  -1    2.90    0.15 
   2  -3   1    2.93    0.15 
   2  -3   1    2.72    0.18 
   2  -3   1    2.81    0.13 
  -3   3  -1    0.01    0.04 
  -3   3  -1    0.05    0.07 
   3  -3   1    0.06    0.07 
   3  -3   1    0.11    0.13 
   3  -3   1   -0.01    0.05 
  -4   3  -1    3.15    0.16 
  -4   3  -1    3.29    0.17 
  -4   3  -1    2.93    0.19 
   4  -3   1    3.05    0.20 
   4  -3   1    2.95    0.25 
  -5   3  -1    0.48    0.12 
  -5   3  -1    0.40    0.10 
  -5   3  -1    0.42    0.09 
   5  -3   1    0.40    0.16 
   5  -3   1    0.44    0.12 
  -6   3  -1    2.60    0.21 
  -6   3  -1    3.10    0.21 
  -6   3  -1    2.71    0.20 
   6  -3   1    3.31    0.31 
   6  -3   1    2.37    0.24 
  -7   3  -1    5.45    0.31 
  -7   3  -1    5.70    0.31 
  -7   3  -1    5.62    0.32 
   7  -3   1    5.98    0.44 
   7  -3   1    5.87    0.36 
  -8   3  -1    2.11    0.24 
  -8   3  -1    2.28    0.24 
  -8   3  -1    1.70    0.21 
   8  -3   1    2.52    0.30 
   8  -3   1    2.18    0.35 
  -9   3  -1    0.07    0.11 
   9  -3   1   -0.04    0.23 
   9  -3   1   -0.04    0.16 
 -10   3  -1    0.48    0.16 
  10  -3   1    0.27    0.31 
  10  -3   1    0.11    0.20 
  10   2  -1    3.40    0.45 
  10   2  -1    4.55    0.47 
 -10  -2   1    2.89    0.36 
 -10  -2   1    3.14    0.37 
   9   2  -1    5.33    0.48 
   9   2  -1    4.87    0.47 
  -9  -2   1    5.20    0.40 
  -9  -2   1    5.19    0.40 
   8   2  -1    0.51    0.20 
   8   2  -1    0.62    0.22 
  -8  -2   1    0.25    0.14 
  -8  -2   1    0.59    0.17 
   7   2  -1    0.03    0.15 
   7   2  -1    0.11    0.13 
  -7  -2   1   -0.03    0.10 
  -7  -2   1    0.11    0.11 
   6   2  -1    6.79    0.40 
   6   2  -1    7.45    0.38 
  -6  -2   1    7.06    0.37 
  -6  -2   1    7.40    0.37 
   5   2  -1    2.53    0.22 
   5   2  -1    2.30    0.23 
  -5  -2   1    2.63    0.12 
  -5  -2   1    2.43    0.20 
  -5  -2   1    2.49    0.21 
   4   2  -1    5.29    0.27 
   4   2  -1    4.78    0.27 
  -4  -2   1    4.57    0.24 
  -4  -2   1    5.04    0.15 
  -4  -2   1    4.68    0.24 
   3   2  -1  100.47    2.13 
  -3  -2   1  104.49    2.00 
  -3  -2   1  101.70    2.13 
  -3  -2   1  101.07    2.17 
  -3  -2   1  100.84    2.12 
   2   2  -1   42.50    0.83 
   2   2  -1   41.01    0.92 
  -2  -2   1   41.85    0.95 
  -2  -2   1   42.38    0.83 
  -2  -2   1   41.02    0.93 
  -2  -2   1   42.76    0.92 
   1   2  -1    8.80    0.18 
   1   2  -1    8.81    0.25 
   1   2  -1    8.58    0.18 
  -1  -2   1    8.74    0.23 
  -1  -2   1    8.42    0.26 
  -1  -2   1    9.06    0.25 
   0   2  -1    1.32    0.07 
   0  -2   1    1.47    0.09 
   0  -2   1    1.47    0.06 
   0  -2   1    1.30    0.08 
   0  -2   1    1.42    0.08 
  -1   2  -1   31.68    0.65 
  -1   2  -1   30.82    0.69 
   1  -2   1   33.99    0.69 
   1  -2   1   32.80    0.72 
   1  -2   1   33.08    0.67 
  -2   2  -1  121.18    2.34 
  -2   2  -1  116.37    2.33 
  -2   2  -1  115.62    2.36 
   2  -2   1  116.25    2.39 
   2  -2   1  119.57    2.37 
  -3   2  -1    6.09    0.21 
  -3   2  -1    5.94    0.21 
  -3   2  -1    5.99    0.22 
   3  -2   1    6.19    0.25 
   3  -2   1    5.90    0.26 
  -4   2  -1    0.17    0.06 
  -4   2  -1    0.23    0.07 
  -4   2  -1    0.29    0.08 
   4  -2   1    0.09    0.11 
   4  -2   1    0.24    0.09 
  -5   2  -1    0.52    0.10 
  -5   2  -1    0.59    0.11 
  -5   2  -1    0.42    0.10 
   5  -2   1    0.57    0.14 
   5  -2   1    0.45    0.15 
  -6   2  -1    1.86    0.18 
  -6   2  -1    1.19    0.15 
  -6   2  -1    1.78    0.19 
   6  -2   1    1.57    0.25 
   6  -2   1    1.88    0.23 
  -7   2  -1    4.41    0.28 
  -7   2  -1    4.24    0.26 
  -7   2  -1    4.03    0.27 
   7  -2   1    3.76    0.34 
   7  -2   1    3.80    0.32 
  -8   2  -1    0.56    0.14 
  -8   2  -1    0.67    0.16 
  -8   2  -1    0.59    0.15 
   8  -2   1    0.88    0.22 
   8  -2   1    0.72    0.24 
  -9   2  -1    0.01    0.11 
  -9   2  -1    0.24    0.12 
   9  -2   1   -0.15    0.18 
   9  -2   1   -0.14    0.21 
 -10   2  -1    0.23    0.15 
  10  -2   1   -0.19    0.19 
  10  -2   1    0.15    0.29 
  10   1  -1    2.67    0.43 
  10   1  -1    2.61    0.40 
 -10  -1   1    2.41    0.32 
 -10  -1   1    2.95    0.37 
   9   1  -1   -0.02    0.20 
   9   1  -1    0.02    0.17 
  -9  -1   1    0.07    0.13 
  -9  -1   1    0.08    0.13 
   8   1  -1    0.52    0.22 
   8   1  -1    0.56    0.21 
  -8  -1   1    0.43    0.15 
  -8  -1   1    0.13    0.12 
   7   1  -1    0.41    0.17 
   7   1  -1    0.20    0.17 
  -7  -1   1    0.27    0.13 
  -7  -1   1    0.30    0.12 
   6   1  -1    3.14    0.26 
   6   1  -1    3.17    0.29 
  -6  -1   1    3.12    0.17 
  -6  -1   1    3.02    0.23 
  -6  -1   1    3.01    0.25 
   5   1  -1    5.07    0.29 
   5   1  -1    5.17    0.31 
  -5  -1   1    5.14    0.20 
  -5  -1   1    4.94    0.27 
  -5  -1   1    5.32    0.28 
   4   1  -1    2.94    0.22 
   4   1  -1    3.00    0.21 
  -4  -1   1    3.20    0.13 
  -4  -1   1    3.17    0.20 
  -4  -1   1    2.56    0.18 
   3   1  -1   11.40    0.37 
   3   1  -1   10.76    0.35 
  -3  -1   1   11.52    0.35 
  -3  -1   1   11.67    0.28 
  -3  -1   1   11.28    0.35 
   2   1  -1    1.11    0.10 
  -2  -1   1    0.70    0.08 
  -2  -1   1    1.17    0.10 
  -2  -1   1    0.95    0.10 
  -2  -1   1    1.01    0.06 
   1   1  -1   56.57    1.09 
   1   1  -1   56.58    1.13 
  -1  -1   1   54.92    1.13 
  -1  -1   1   57.15    1.15 
  -1  -1   1   53.41    1.13 
  -1  -1   1   55.33    1.09 
   0   1  -1    0.68    0.03 
   0  -1   1    0.92    0.05 
   0  -1   1    0.88    0.04 
   0  -1   1    0.83    0.03 
  -1   1  -1    7.65    0.20 
  -1   1  -1    6.42    0.17 
  -1   1  -1    6.79    0.17 
   1  -1   1    8.23    0.22 
  -2   1  -1    1.19    0.09 
  -2   1  -1    1.06    0.08 
  -2   1  -1    1.08    0.09 
   2  -1   1    1.11    0.10 
   2  -1   1    1.34    0.12 
  -3   1  -1    6.15    0.22 
  -3   1  -1    6.24    0.21 
  -3   1  -1    5.83    0.21 
   3  -1   1    5.91    0.25 
   3  -1   1    6.54    0.25 
  -4   1  -1    5.85    0.25 
  -4   1  -1    5.69    0.22 
  -4   1  -1    5.55    0.23 
   4  -1   1    6.10    0.28 
   4  -1   1    5.64    0.28 
  -5   1  -1    2.99    0.18 
  -5   1  -1    2.88    0.20 
  -5   1  -1    3.16    0.21 
   5  -1   1    3.34    0.25 
   5  -1   1    2.91    0.24 
  -6   1  -1    3.35    0.23 
  -6   1  -1    3.47    0.21 
  -6   1  -1    3.62    0.24 
   6  -1   1    3.60    0.29 
   6  -1   1    3.05    0.28 
  -7   1  -1    4.41    0.25 
  -7   1  -1    5.06    0.31 
  -7   1  -1    4.61    0.31 
   7  -1   1    5.43    0.37 
   7  -1   1    4.28    0.37 
  -8   1  -1    0.36    0.13 
  -8   1  -1    0.56    0.15 
   8  -1   1    0.35    0.19 
   8  -1   1    0.59    0.22 
  -9   1  -1    0.10    0.13 
  -9   1  -1    0.07    0.11 
   9  -1   1    0.11    0.23 
   9  -1   1   -0.31    0.18 
 -10   1  -1    0.19    0.13 
  10  -1   1    0.09    0.25 
  10  -1   1    0.15    0.23 
  10   0  -1    4.00    0.49 
  10   0  -1    2.89    0.41 
 -10   0   1    3.40    0.37 
 -10   0   1    3.84    0.37 
   9   0  -1    0.56    0.24 
   9   0  -1    0.07    0.20 
  -9   0   1    0.18    0.13 
  -9   0   1    0.14    0.13 
   8   0  -1    1.30    0.27 
   8   0  -1    1.53    0.27 
  -8   0   1    1.30    0.21 
  -8   0   1    1.21    0.21 
   7   0  -1    0.08    0.14 
   7   0  -1    0.19    0.15 
  -7   0   1    0.11    0.09 
  -7   0   1    0.11    0.08 
  -7   0   1    0.07    0.10 
   6   0  -1   -0.10    0.10 
   6   0  -1   -0.10    0.11 
  -6   0   1    0.13    0.10 
  -6   0   1   -0.09    0.08 
  -6   0   1    0.10    0.07 
   5   0  -1   -0.01    0.10 
   5   0  -1    0.19    0.12 
  -5   0   1    0.05    0.08 
  -5   0   1    0.22    0.07 
  -5   0   1    0.10    0.09 
   4   0  -1    8.14    0.32 
   4   0  -1    7.74    0.33 
  -4   0   1    8.97    0.32 
  -4   0   1    8.55    0.26 
  -4   0   1    8.50    0.31 
   3   0  -1   36.24    0.81 
   3   0  -1   35.71    0.85 
  -3   0   1   35.75    0.82 
  -3   0   1   35.21    0.77 
  -3   0   1   35.07    0.82 
   2   0  -1   -0.02    0.05 
   2   0  -1   -0.04    0.05 
  -2   0   1    0.04    0.05 
  -2   0   1   -0.02    0.04 
  -2   0   1    0.12    0.04 
   1   0  -1    0.68    0.05 
   1   0  -1    0.82    0.06 
  -1   0   1    0.84    0.06 
  -1   0   1    0.85    0.05 
   0   0  -1    0.01    0.01 
   0   0  -1    0.00    0.00 
   0   0  -1    0.00    0.00 
   0   0  -1   -0.01    0.01 
   0   0   1    0.00    0.01 
  -1   0  -1    6.32    0.17 
  -1   0  -1    6.08    0.15 
  -1   0  -1    6.04    0.16 
   1   0   1    6.21    0.17 
   1   0   1    5.33    0.18 
  -2   0  -1    1.79    0.10 
  -2   0  -1    1.84    0.09 
  -2   0  -1    1.91    0.11 
   2   0   1    1.91    0.12 
   2   0   1    1.79    0.12 
  -3   0  -1    9.18    0.25 
  -3   0  -1    8.83    0.29 
  -3   0  -1    8.65    0.28 
   3   0   1    8.86    0.31 
   3   0   1    9.38    0.32 
  -4   0  -1    3.34    0.19 
  -4   0  -1    3.27    0.15 
  -4   0  -1    3.03    0.18 
   4   0   1    3.23    0.22 
   4   0   1    2.97    0.22 
  -5   0  -1    0.25    0.09 
  -5   0  -1    0.33    0.08 
  -5   0  -1    0.44    0.10 
   5   0   1    0.22    0.13 
   5   0   1    0.65    0.14 
  -6   0  -1    1.64    0.19 
  -6   0  -1    1.73    0.19 
  -6   0  -1    1.77    0.15 
   6   0   1    1.18    0.20 
   6   0   1    1.42    0.22 
  -7   0  -1    2.28    0.25 
  -7   0  -1    2.08    0.24 
   7   0   1    2.09    0.26 
   7   0   1    2.28    0.29 
  -8   0  -1    0.71    0.18 
  -8   0  -1    0.80    0.17 
   8   0   1    0.93    0.24 
   8   0   1    0.90    0.24 
  -9   0  -1    0.28    0.15 
  -9   0  -1    0.37    0.15 
   9   0   1    0.43    0.21 
   9   0   1    0.71    0.25 
 -10   0  -1    0.51    0.19 
 -10   0  -1    0.48    0.17 
  10   0   1    0.72    0.29 
  10   0   1   -0.13    0.24 
  10  -1  -1    2.12    0.39 
  10  -1  -1    2.03    0.34 
 -10   1   1    1.42    0.25 
 -10   1   1    1.75    0.29 
   9  -1  -1   -0.16    0.17 
   9  -1  -1    0.24    0.21 
  -9   1   1    0.02    0.12 
  -9   1   1    0.11    0.13 
   8  -1  -1   -0.19    0.15 
   8  -1  -1   -0.06    0.19 
  -8   1   1    0.10    0.12 
  -8   1   1    0.00    0.10 
   7  -1  -1    1.36    0.21 
   7  -1  -1    1.65    0.26 
  -7   1   1    1.49    0.19 
  -7   1   1    1.42    0.16 
  -7   1   1    1.62    0.21 
   6  -1  -1    1.45    0.20 
   6  -1  -1    1.60    0.23 
  -6   1   1    1.92    0.21 
  -6   1   1    1.73    0.15 
  -6   1   1    1.85    0.20 
   5  -1  -1    1.11    0.18 
   5  -1  -1    1.11    0.16 
  -5   1   1    0.81    0.13 
  -5   1   1    0.78    0.11 
  -5   1   1    0.67    0.12 
   4  -1  -1   20.62    0.60 
   4  -1  -1   19.64    0.55 
  -4   1   1   20.49    0.52 
  -4   1   1   20.11    0.55 
  -4   1   1   20.76    0.55 
   3  -1  -1    3.28    0.17 
   3  -1  -1    3.16    0.20 
  -3   1   1    3.06    0.15 
  -3   1   1    3.42    0.16 
  -3   1   1    3.31    0.16 
   2  -1  -1    2.23    0.15 
   2  -1  -1    2.32    0.12 
  -2   1   1    2.40    0.12 
  -2   1   1    2.39    0.12 
  -2   1   1    2.20    0.11 
   1  -1  -1  143.75    2.85 
   1  -1  -1  139.10    2.90 
   1  -1  -1  148.74    2.91 
  -1   1   1  145.16    2.84 
  -1   1   1  145.43    2.83 
   0  -1  -1   99.08    2.02 
   0  -1  -1   96.60    1.95 
   0  -1  -1   97.87    1.96 
   0   1   1   99.51    1.99 
   0   1   1  104.68    1.98 
  -1  -1  -1  306.01    5.98 
  -1  -1  -1  306.50    6.16 
  -1  -1  -1  306.76    6.07 
   1   1   1  292.97    5.90 
   1   1   1  302.55    5.94 
  -2  -1  -1    5.70    0.15 
  -2  -1  -1    5.52    0.21 
  -2  -1  -1    5.49    0.20 
  -2  -1  -1    5.94    0.21 
   2   1   1    5.69    0.21 
  -3  -1  -1    0.17    0.04 
  -3  -1  -1    0.12    0.07 
  -3  -1  -1    0.23    0.08 
   3   1   1    0.12    0.08 
   3   1   1    0.23    0.08 
  -4  -1  -1    0.90    0.08 
  -4  -1  -1    0.89    0.12 
  -4  -1  -1    0.71    0.11 
   4   1   1    1.03    0.14 
   4   1   1    1.03    0.15 
  -5  -1  -1    8.56    0.36 
  -5  -1  -1    8.29    0.35 
  -5  -1  -1    8.46    0.26 
   5   1   1    8.15    0.37 
   5   1   1    8.21    0.38 
  -6  -1  -1    0.47    0.13 
  -6  -1  -1    0.48    0.08 
  -6  -1  -1    0.37    0.12 
   6   1   1    0.22    0.13 
   6   1   1    0.63    0.19 
  -7  -1  -1    0.03    0.10 
  -7  -1  -1    0.02    0.11 
   7   1   1    0.20    0.14 
   7   1   1    0.02    0.17 
  -8  -1  -1    0.27    0.13 
  -8  -1  -1    0.19    0.12 
   8   1   1    0.06    0.19 
   8   1   1    0.21    0.18 
  -9  -1  -1   -0.05    0.12 
  -9  -1  -1    0.12    0.12 
   9   1   1    0.30    0.19 
   9   1   1   -0.26    0.20 
 -10  -1  -1    2.49    0.32 
 -10  -1  -1    2.70    0.34 
  10   1   1    3.65    0.47 
  10   1   1    2.87    0.44 
  10  -2  -1   -0.27    0.26 
  10  -2  -1   -0.37    0.18 
 -10   2   1    0.09    0.12 
   9  -2  -1    0.03    0.18 
   9  -2  -1   -0.12    0.21 
  -9   2   1    0.13    0.12 
  -9   2   1    0.10    0.13 
   8  -2  -1    9.74    0.59 
   8  -2  -1    9.86    0.49 
  -8   2   1    9.94    0.47 
  -8   2   1    9.18    0.41 
  -8   2   1    9.78    0.47 
   7  -2  -1    0.94    0.19 
   7  -2  -1    0.93    0.25 
  -7   2   1    0.97    0.16 
  -7   2   1    0.76    0.13 
  -7   2   1    0.73    0.15 
   6  -2  -1    3.43    0.34 
   6  -2  -1    3.94    0.27 
  -6   2   1    3.73    0.24 
  -6   2   1    3.64    0.22 
  -6   2   1    3.63    0.24 
   5  -2  -1    0.35    0.12 
   5  -2  -1    0.25    0.14 
  -5   2   1    0.32    0.10 
  -5   2   1    0.32    0.09 
  -5   2   1    0.41    0.10 
   4  -2  -1   13.51    0.40 
   4  -2  -1   13.26    0.47 
  -4   2   1   13.34    0.40 
  -4   2   1   13.04    0.39 
  -4   2   1   13.30    0.41 
   3  -2  -1    2.60    0.15 
   3  -2  -1    2.01    0.20 
  -3   2   1    2.05    0.14 
  -3   2   1    2.40    0.13 
  -3   2   1    2.17    0.14 
   2  -2  -1   19.70    0.52 
   2  -2  -1   20.07    0.45 
   2  -2  -1   19.50    0.47 
  -2   2   1   19.82    0.46 
  -2   2   1   20.32    0.48 
   1  -2  -1  322.27    6.57 
   1  -2  -1  327.94    6.33 
   1  -2  -1  308.55    6.37 
  -1   2   1  323.79    6.29 
  -1   2   1  317.57    6.38 
   0  -2  -1    2.68    0.12 
   0  -2  -1    2.83    0.12 
   0  -2  -1    2.77    0.14 
   0   2   1    2.55    0.11 
   0   2   1    2.45    0.10 
  -1  -2  -1    1.01    0.10 
  -1  -2  -1    1.03    0.09 
  -1  -2  -1    0.74    0.08 
   1   2   1    0.89    0.05 
   1   2   1    0.91    0.09 
  -2  -2  -1   26.83    0.66 
  -2  -2  -1   27.55    0.66 
  -2  -2  -1   27.47    0.55 
  -2  -2  -1   27.62    0.65 
   2   2   1   26.86    0.66 
  -3  -2  -1   12.71    0.40 
  -3  -2  -1   12.31    0.39 
  -3  -2  -1   12.44    0.40 
  -3  -2  -1   12.69    0.28 
   3   2   1   12.38    0.40 
  -4  -2  -1    4.19    0.24 
  -4  -2  -1    4.06    0.14 
  -4  -2  -1    4.06    0.23 
   4   2   1    4.17    0.26 
   4   2   1    4.21    0.24 
  -5  -2  -1    1.90    0.19 
  -5  -2  -1    1.72    0.10 
  -5  -2  -1    1.88    0.20 
   5   2   1    1.94    0.23 
   5   2   1    1.63    0.20 
  -6  -2  -1   22.84    0.71 
  -6  -2  -1   21.60    0.70 
   6   2   1   20.90    0.72 
   6   2   1   21.57    0.74 
  -7  -2  -1   -0.02    0.11 
  -7  -2  -1    0.02    0.10 
   7   2   1    0.09    0.16 
   7   2   1    0.19    0.13 
  -8  -2  -1    0.00    0.12 
  -8  -2  -1    0.11    0.11 
   8   2   1   -0.06    0.17 
   8   2   1    0.19    0.15 
  -9  -2  -1    0.00    0.13 
  -9  -2  -1   -0.12    0.11 
   9   2   1   -0.15    0.22 
   9   2   1    0.19    0.20 
 -10  -2  -1    0.87    0.22 
 -10  -2  -1    0.91    0.23 
  10   2   1    1.52    0.30 
  10   2   1    0.51    0.30 
  10  -3  -1   -0.21    0.23 
 -10   3   1    0.19    0.14 
   9  -3  -1    0.39    0.26 
   9  -3  -1    0.88    0.22 
   9  -3  -1    1.08    0.20 
  -9   3   1    0.55    0.24 
  -9   3   1    0.69    0.18 
   8  -3  -1    7.39    0.51 
   8  -3  -1    8.23    0.43 
  -8   3   1    8.01    0.41 
  -8   3   1    8.20    0.42 
  -8   3   1    7.71    0.38 
   7  -3  -1    1.25    0.27 
   7  -3  -1    1.22    0.19 
  -7   3   1    1.20    0.17 
  -7   3   1    0.99    0.16 
  -7   3   1    1.07    0.17 
   6  -3  -1    0.62    0.15 
   6  -3  -1    0.56    0.19 
  -6   3   1    0.64    0.12 
  -6   3   1    0.71    0.13 
  -6   3   1    0.83    0.15 
   5  -3  -1   33.80    0.98 
   5  -3  -1   36.66    0.89 
  -5   3   1   36.41    0.89 
  -5   3   1   37.08    0.89 
  -5   3   1   35.79    0.90 
   4  -3  -1   14.39    0.41 
   4  -3  -1   14.81    0.43 
   4  -3  -1   13.73    0.49 
  -4   3   1   14.14    0.41 
  -4   3   1   13.78    0.43 
   3  -3  -1    0.39    0.13 
   3  -3  -1    0.37    0.08 
   3  -3  -1    0.43    0.08 
  -3   3   1    0.41    0.09 
  -3   3   1    0.49    0.07 
   2  -3  -1    2.75    0.13 
   2  -3  -1    2.64    0.15 
   2  -3  -1    3.02    0.20 
  -2   3   1    2.73    0.12 
  -2   3   1    2.57    0.15 
   1  -3  -1  542.26   10.69 
   1  -3  -1  552.64   11.10 
   1  -3  -1  523.26   10.75 
   1  -3  -1  537.17   10.73 
  -1   3   1  539.60   10.71 
   0  -3  -1    1.65    0.10 
   0  -3  -1    1.58    0.12 
   0  -3  -1    1.58    0.11 
   0  -3  -1    1.44    0.10 
   0   3   1    1.71    0.09 
  -1  -3  -1    1.52    0.12 
  -1  -3  -1    1.61    0.12 
  -1  -3  -1    1.45    0.12 
   1   3   1    1.51    0.12 
   1   3   1    1.58    0.07 
  -2  -3  -1   26.04    0.64 
  -2  -3  -1   25.11    0.65 
  -2  -3  -1   26.06    0.66 
   2   3   1   26.14    0.65 
  -3  -3  -1    0.00    0.06 
  -3  -3  -1    0.05    0.07 
  -3  -3  -1   -0.02    0.06 
   3   3   1    0.02    0.09 
  -4  -3  -1    2.84    0.22 
  -4  -3  -1    3.47    0.23 
  -4  -3  -1    3.26    0.23 
   4   3   1    3.38    0.25 
  -5  -3  -1    9.77    0.41 
  -5  -3  -1    9.44    0.40 
   5   3   1   10.45    0.44 
   5   3   1    9.70    0.43 
  -6  -3  -1    0.60    0.14 
  -6  -3  -1    0.56    0.15 
   6   3   1    0.90    0.21 
   6   3   1    0.56    0.17 
  -7  -3  -1    0.79    0.18 
  -7  -3  -1    1.24    0.20 
   7   3   1    1.01    0.21 
   7   3   1    1.20    0.24 
  -8  -3  -1    0.17    0.12 
  -8  -3  -1    0.25    0.14 
   8   3   1    0.30    0.18 
   8   3   1   -0.16    0.20 
  -9  -3  -1    0.23    0.15 
  -9  -3  -1    0.28    0.17 
   9   3   1    0.46    0.26 
   9   3   1    0.61    0.23 
 -10  -3  -1    0.56    0.20 
 -10  -3  -1    0.22    0.19 
  10   3   1    0.76    0.24 
  10   3   1    0.02    0.27 
  10  -4  -1   -0.10    0.27 
 -10   4   1    0.19    0.13 
   9  -4  -1    0.19    0.13 
   9  -4  -1    0.09    0.27 
   9  -4  -1   -0.13    0.22 
  -9   4   1   -0.14    0.12 
  -9   4   1    0.05    0.11 
   8  -4  -1   11.22    0.50 
   8  -4  -1   12.37    0.51 
   8  -4  -1   12.04    0.66 
  -8   4   1   11.12    0.48 
  -8   4   1   12.37    0.51 
   7  -4  -1    2.84    0.25 
   7  -4  -1    3.01    0.36 
   7  -4  -1    2.47    0.25 
  -7   4   1    3.00    0.23 
  -7   4   1    2.80    0.23 
   6  -4  -1    4.35    0.26 
   6  -4  -1    4.25    0.26 
   6  -4  -1    3.98    0.38 
  -6   4   1    4.22    0.25 
  -6   4   1    3.93    0.25 
   5  -4  -1    3.44    0.22 
   5  -4  -1    3.37    0.22 
   5  -4  -1    3.68    0.34 
  -5   4   1    3.36    0.22 
  -5   4   1    3.47    0.20 
   4  -4  -1    1.53    0.15 
   4  -4  -1    1.71    0.14 
   4  -4  -1    1.40    0.19 
  -4   4   1    1.73    0.17 
  -4   4   1    1.71    0.13 
   3  -4  -1   13.37    0.36 
   3  -4  -1   12.46    0.38 
   3  -4  -1   12.77    0.45 
  -3   4   1   12.26    0.39 
  -3   4   1   13.03    0.35 
   2  -4  -1    1.72    0.18 
   2  -4  -1    1.80    0.11 
   2  -4  -1    2.02    0.16 
   2  -4  -1    1.85    0.11 
  -2   4   1    2.07    0.15 
   1  -4  -1    0.53    0.11 
   1  -4  -1    0.43    0.07 
   1  -4  -1    0.46    0.10 
   1  -4  -1    0.39    0.07 
  -1   4   1    0.39    0.08 
   0  -4  -1  108.47    2.27 
   0  -4  -1  108.21    2.21 
   0  -4  -1  110.27    2.25 
   0  -4  -1  109.87    2.23 
   0   4   1  111.97    2.20 
  -1  -4  -1    5.98    0.23 
  -1  -4  -1    5.63    0.24 
  -1  -4  -1    5.36    0.24 
   1   4   1    5.79    0.17 
   1   4   1    6.22    0.23 
  -2  -4  -1    1.32    0.07 
  -2  -4  -1    1.32    0.13 
  -2  -4  -1    1.41    0.14 
  -2  -4  -1    0.77    0.12 
   2   4   1    1.00    0.13 
  -3  -4  -1    5.45    0.28 
  -3  -4  -1    5.46    0.28 
  -3  -4  -1    5.54    0.26 
   3   4   1    5.48    0.27 
  -4  -4  -1    2.83    0.22 
  -4  -4  -1    2.24    0.20 
  -4  -4  -1    2.80    0.22 
   4   4   1    3.02    0.25 
  -5  -4  -1    0.18    0.10 
  -5  -4  -1    0.09    0.09 
   5   4   1   -0.08    0.12 
   5   4   1   -0.06    0.10 
  -6  -4  -1    0.05    0.11 
  -6  -4  -1    0.03    0.10 
   6   4   1    0.18    0.15 
   6   4   1    0.14    0.11 
  -7  -4  -1    3.99    0.33 
  -7  -4  -1    4.45    0.34 
   7   4   1    4.42    0.40 
   7   4   1    4.96    0.38 
  -8  -4  -1    0.30    0.15 
  -8  -4  -1    0.40    0.17 
   8   4   1    0.43    0.22 
   8   4   1    0.73    0.21 
  -9  -4  -1    2.35    0.32 
  -9  -4  -1    1.29    0.26 
   9   4   1    2.66    0.38 
   9   4   1    2.05    0.38 
  10  -5  -1    0.06    0.31 
   9  -5  -1    0.50    0.31 
  -9   5   1    0.51    0.18 
  -9   5   1    0.71    0.16 
   8  -5  -1    0.65    0.17 
   8  -5  -1    0.93    0.18 
   8  -5  -1    0.58    0.29 
  -8   5   1    0.67    0.17 
  -8   5   1    0.82    0.16 
   7  -5  -1    1.01    0.17 
   7  -5  -1    0.80    0.16 
   7  -5  -1    0.81    0.25 
  -7   5   1    1.16    0.16 
  -7   5   1    0.75    0.17 
   6  -5  -1    3.75    0.24 
   6  -5  -1    3.56    0.35 
   6  -5  -1    3.60    0.25 
  -6   5   1    3.60    0.25 
  -6   5   1    3.58    0.23 
   5  -5  -1   30.37    0.80 
   5  -5  -1   29.63    0.92 
   5  -5  -1   30.58    0.78 
  -5   5   1   31.63    0.77 
  -5   5   1   30.93    0.83 
   4  -5  -1    5.26    0.26 
   4  -5  -1    6.27    0.25 
   4  -5  -1    5.31    0.33 
  -4   5   1    6.10    0.24 
  -4   5   1    5.72    0.28 
   3  -5  -1   12.36    0.40 
   3  -5  -1   12.88    0.37 
   3  -5  -1   12.24    0.46 
  -3   5   1   13.07    0.35 
  -3   5   1   12.67    0.41 
   2  -5  -1   84.53    1.78 
   2  -5  -1   82.86    1.85 
   2  -5  -1   84.11    1.72 
   2  -5  -1   82.62    1.74 
  -2   5   1   85.68    1.78 
   1  -5  -1    3.36    0.16 
   1  -5  -1    3.35    0.21 
   1  -5  -1    3.48    0.16 
   1  -5  -1    3.66    0.23 
  -1   5   1    3.36    0.17 
   0  -5  -1    7.69    0.30 
   0  -5  -1    7.36    0.25 
   0  -5  -1    7.66    0.29 
   0  -5  -1    7.20    0.26 
   0   5   1    7.22    0.23 
  -1  -5  -1    0.83    0.11 
  -1  -5  -1    0.94    0.13 
  -1  -5  -1    0.75    0.12 
   1   5   1    0.92    0.07 
   1   5   1    0.83    0.12 
  -2  -5  -1   26.99    0.69 
  -2  -5  -1   26.37    0.72 
  -2  -5  -1   26.08    0.73 
   2   5   1   28.21    0.55 
   2   5   1   26.46    0.71 
  -3  -5  -1    1.81    0.18 
  -3  -5  -1    1.94    0.19 
  -3  -5  -1    1.63    0.18 
   3   5   1    1.56    0.18 
  -4  -5  -1    1.67    0.21 
  -4  -5  -1    0.96    0.16 
  -4  -5  -1    1.30    0.17 
   4   5   1    1.08    0.18 
  -5  -5  -1   15.20    0.58 
  -5  -5  -1   15.91    0.57 
  -5  -5  -1   16.63    0.62 
   5   5   1   15.72    0.60 
  -6  -5  -1    1.05    0.20 
  -6  -5  -1    1.00    0.18 
   6   5   1    1.07    0.22 
   6   5   1    1.01    0.20 
  -7  -5  -1    0.07    0.12 
  -7  -5  -1    0.21    0.15 
   7   5   1    0.29    0.16 
   7   5   1    0.16    0.20 
  -8  -5  -1    1.13    0.23 
  -8  -5  -1    1.22    0.24 
   8   5   1    1.11    0.30 
   8   5   1    1.03    0.24 
  -9  -5  -1    0.85    0.23 
  -9  -5  -1    0.72    0.22 
   9   5   1    1.32    0.25 
   9   5   1    0.19    0.26 
  10  -6  -1    0.54    0.34 
 -10   6   1    0.44    0.19 
   9  -6  -1    2.48    0.41 
  -9   6   1    1.85    0.27 
   8  -6  -1    3.07    0.41 
   8  -6  -1    4.14    0.31 
  -8   6   1    3.69    0.32 
  -8   6   1    3.35    0.26 
   7  -6  -1    0.47    0.14 
   7  -6  -1    0.25    0.12 
   7  -6  -1    0.50    0.25 
  -7   6   1    0.42    0.11 
  -7   6   1    0.41    0.15 
   6  -6  -1    2.28    0.20 
   6  -6  -1    2.94    0.36 
   6  -6  -1    2.89    0.23 
  -6   6   1    2.02    0.23 
  -6   6   1    2.49    0.19 
   5  -6  -1   -0.03    0.09 
   5  -6  -1   -0.02    0.07 
   5  -6  -1    0.00    0.16 
  -5   6   1    0.00    0.11 
  -5   6   1   -0.02    0.06 
   4  -6  -1    0.96    0.20 
   4  -6  -1    0.80    0.11 
   4  -6  -1    0.57    0.13 
  -4   6   1    0.77    0.14 
  -4   6   1    0.78    0.10 
   3  -6  -1    4.13    0.18 
   3  -6  -1    3.84    0.24 
   3  -6  -1    4.20    0.28 
   3  -6  -1    3.80    0.19 
  -3   6   1    4.29    0.24 
   2  -6  -1  167.56    3.53 
   2  -6  -1  165.63    3.44 
   2  -6  -1  172.99    3.41 
   2  -6  -1  166.59    3.37 
  -2   6   1  170.98    3.44 
   1  -6  -1    4.92    0.28 
   1  -6  -1    5.32    0.26 
   1  -6  -1    5.19    0.21 
   1  -6  -1    5.37    0.22 
  -1   6   1    5.63    0.23 
   0  -6  -1    0.60    0.13 
   0  -6  -1    0.36    0.09 
   0  -6  -1    0.59    0.11 
   0   6   1    0.58    0.10 
   0   6   1    0.48    0.08 
  -1  -6  -1    9.11    0.37 
  -1  -6  -1    9.03    0.32 
  -1  -6  -1    9.15    0.36 
   1   6   1    9.99    0.35 
   1   6   1    8.97    0.26 
  -2  -6  -1    0.95    0.15 
  -2  -6  -1    1.25    0.15 
  -2  -6  -1    1.08    0.15 
   2   6   1    1.20    0.06 
   2   6   1    1.20    0.16 
  -3  -6  -1    0.31    0.12 
  -3  -6  -1    0.67    0.13 
  -3  -6  -1    0.44    0.12 
   3   6   1    0.49    0.13 
  -4  -6  -1   -0.10    0.08 
  -4  -6  -1   -0.15    0.08 
  -4  -6  -1   -0.02    0.10 
   4   6   1   -0.06    0.11 
  -5  -6  -1    0.88    0.18 
  -5  -6  -1    0.66    0.16 
  -5  -6  -1    0.95    0.17 
   5   6   1    1.00    0.21 
  -6  -6  -1    1.42    0.22 
  -6  -6  -1    1.87    0.25 
   6   6   1    1.54    0.25 
   6   6   1    1.47    0.26 
  -7  -6  -1    1.69    0.27 
  -7  -6  -1    2.46    0.32 
   7   6   1    2.47    0.33 
   7   6   1    2.43    0.36 
  -8  -6  -1    0.21    0.16 
  -8  -6  -1    0.15    0.15 
   8   6   1    0.00    0.22 
   8   6   1    0.52    0.19 
  -9  -6  -1    0.13    0.17 
  -9  -6  -1   -0.01    0.15 
   9   6   1    0.04    0.23 
  10  -7  -1   -0.41    0.29 
 -10   7   1   -0.09    0.15 
   9  -7  -1    7.73    0.65 
  -9   7   1    8.90    0.51 
   8  -7  -1    2.50    0.41 
  -8   7   1    2.09    0.28 
   7  -7  -1    1.67    0.21 
   7  -7  -1    1.38    0.29 
  -7   7   1    1.57    0.24 
  -7   7   1    1.64    0.22 
   6  -7  -1    1.76    0.29 
   6  -7  -1    1.53    0.20 
   6  -7  -1    1.88    0.19 
  -6   7   1    2.18    0.25 
  -6   7   1    1.55    0.16 
   5  -7  -1   -0.09    0.16 
   5  -7  -1   -0.03    0.07 
   5  -7  -1   -0.08    0.11 
  -5   7   1    0.11    0.12 
  -5   7   1   -0.02    0.06 
   4  -7  -1    1.63    0.16 
   4  -7  -1    1.64    0.20 
   4  -7  -1    1.60    0.14 
   4  -7  -1    1.38    0.23 
  -4   7   1    1.66    0.19 
   3  -7  -1    2.13    0.26 
   3  -7  -1    1.61    0.14 
   3  -7  -1    1.90    0.14 
   3  -7  -1    1.54    0.19 
  -3   7   1    1.45    0.16 
   2  -7  -1    2.39    0.15 
   2  -7  -1    2.38    0.22 
   2  -7  -1    2.36    0.23 
   2  -7  -1    2.26    0.16 
  -2   7   1    2.46    0.19 
   1  -7  -1   32.10    0.76 
   1  -7  -1   32.29    0.84 
   1  -7  -1   32.33    0.90 
   1  -7  -1   32.93    0.80 
  -1   7   1   33.36    0.80 
   0  -7  -1    0.98    0.12 
   0  -7  -1    1.26    0.17 
   0  -7  -1    1.14    0.17 
   0   7   1    1.07    0.14 
   0   7   1    0.85    0.10 
  -1  -7  -1    0.04    0.09 
  -1  -7  -1    0.15    0.08 
  -1  -7  -1    0.05    0.10 
   1   7   1    0.13    0.10 
   1   7   1    0.09    0.05 
  -2  -7  -1    1.89    0.19 
  -2  -7  -1    2.20    0.23 
  -2  -7  -1    2.06    0.19 
   2   7   1    2.37    0.22 
  -3  -7  -1    6.81    0.32 
  -3  -7  -1    6.23    0.35 
  -3  -7  -1    6.50    0.36 
   3   7   1    6.60    0.35 
  -4  -7  -1   -0.02    0.10 
  -4  -7  -1   -0.01    0.09 
  -4  -7  -1    0.05    0.11 
   4   7   1    0.03    0.11 
  -5  -7  -1    0.60    0.17 
  -5  -7  -1    0.90    0.19 
  -5  -7  -1    0.67    0.16 
   5   7   1    0.32    0.17 
  -6  -7  -1    0.05    0.12 
  -6  -7  -1    0.18    0.13 
   6   7   1    0.31    0.16 
   6   7   1    0.08    0.17 
  -7  -7  -1    0.57    0.20 
  -7  -7  -1    0.65    0.19 
   7   7   1    0.78    0.26 
   7   7   1    0.44    0.18 
  -8  -7  -1    2.77    0.35 
  -8  -7  -1    2.80    0.35 
   8   7   1    3.19    0.42 
   8   7   1    4.74    0.41 
  10  -8  -1   -0.68    0.29 
 -10   8   1   -0.17    0.14 
   9  -8  -1    0.57    0.34 
  -9   8   1    0.16    0.19 
   8  -8  -1    2.21    0.39 
  -8   8   1    2.17    0.29 
   7  -8  -1   -0.01    0.21 
   7  -8  -1    0.12    0.16 
  -7   8   1   -0.02    0.12 
   6  -8  -1   11.85    0.62 
   6  -8  -1   10.94    0.46 
   6  -8  -1   11.77    0.49 
  -6   8   1   12.49    0.53 
   5  -8  -1    0.36    0.20 
   5  -8  -1    0.44    0.11 
   5  -8  -1    0.47    0.16 
   5  -8  -1    0.51    0.10 
  -5   8   1    0.57    0.16 
   4  -8  -1   10.13    0.34 
   4  -8  -1    9.74    0.36 
   4  -8  -1    9.32    0.50 
   4  -8  -1   10.20    0.42 
  -4   8   1   10.25    0.42 
   3  -8  -1   20.05    0.63 
   3  -8  -1   19.96    0.52 
   3  -8  -1   20.16    0.71 
   3  -8  -1   19.70    0.56 
  -3   8   1   19.84    0.62 
   2  -8  -1    5.05    0.30 
   2  -8  -1    4.91    0.24 
   2  -8  -1    5.24    0.34 
   2  -8  -1    4.99    0.22 
  -2   8   1    4.80    0.27 
   1  -8  -1    7.73    0.38 
   1  -8  -1    8.22    0.37 
   1  -8  -1    7.29    0.31 
   1  -8  -1    7.74    0.28 
  -1   8   1    7.17    0.30 
   0  -8  -1    0.29    0.10 
   0  -8  -1    0.37    0.13 
   0  -8  -1    0.63    0.15 
   0   8   1    0.36    0.11 
   0   8   1    0.30    0.08 
  -1  -8  -1   13.56    0.44 
  -1  -8  -1   12.89    0.49 
  -1  -8  -1   12.68    0.51 
   1   8   1   13.40    0.48 
   1   8   1   13.42    0.37 
  -2  -8  -1    1.96    0.24 
  -2  -8  -1    1.62    0.18 
  -2  -8  -1    1.77    0.22 
   2   8   1    1.82    0.22 
  -3  -8  -1    0.03    0.10 
  -3  -8  -1    0.11    0.11 
  -3  -8  -1    0.01    0.09 
   3   8   1    0.06    0.11 
  -4  -8  -1   10.20    0.45 
  -4  -8  -1    9.78    0.49 
  -4  -8  -1    9.81    0.49 
   4   8   1    8.69    0.47 
  -5  -8  -1    0.14    0.13 
  -5  -8  -1   -0.02    0.10 
  -5  -8  -1    0.11    0.11 
   5   8   1   -0.04    0.16 
  -6  -8  -1   -0.13    0.10 
  -6  -8  -1    0.02    0.14 
  -6  -8  -1   -0.12    0.10 
   6   8   1    0.19    0.18 
  -7  -8  -1    2.43    0.31 
  -7  -8  -1    3.03    0.37 
   7   8   1    2.30    0.33 
   7   8   1    2.45    0.37 
  -8  -8  -1    1.21    0.28 
  -8  -8  -1    1.22    0.26 
   8   8   1    1.17    0.32 
   9  -9  -1   -0.27    0.23 
  -9   9   1   -0.18    0.16 
   8  -9  -1    1.99    0.38 
  -8   9   1    2.48    0.32 
   7  -9  -1    1.10    0.28 
  -7   9   1    0.77    0.22 
   6  -9  -1    0.11    0.15 
   6  -9  -1    0.51    0.25 
  -6   9   1    0.30    0.17 
   5  -9  -1    3.50    0.31 
   5  -9  -1    2.98    0.21 
   5  -9  -1    3.84    0.36 
  -5   9   1    3.42    0.29 
   4  -9  -1    0.93    0.14 
   4  -9  -1    0.67    0.18 
   4  -9  -1    0.88    0.22 
  -4   9   1    0.46    0.14 
   3  -9  -1   27.51    0.91 
   3  -9  -1   28.34    0.80 
   3  -9  -1   28.57    0.73 
   3  -9  -1   27.31    0.74 
  -3   9   1   26.46    0.78 
   2  -9  -1    1.21    0.19 
   2  -9  -1    1.27    0.13 
   2  -9  -1    1.14    0.15 
   2  -9  -1    1.24    0.22 
  -2   9   1    1.01    0.15 
   1  -9  -1    0.33    0.14 
   1  -9  -1    0.30    0.09 
   1  -9  -1    0.45    0.11 
   1  -9  -1    0.67    0.15 
  -1   9   1    0.14    0.08 
   0  -9  -1    1.99    0.23 
   0  -9  -1    1.64    0.16 
   0  -9  -1    1.29    0.20 
   0   9   1    1.55    0.19 
   0   9   1    1.77    0.15 
  -1  -9  -1    0.01    0.08 
  -1  -9  -1    0.01    0.11 
  -1  -9  -1    0.13    0.10 
   1   9   1   -0.01    0.06 
   1   9   1    0.05    0.10 
  -2  -9  -1    0.06    0.10 
  -2  -9  -1    0.09    0.13 
  -2  -9  -1    0.13    0.11 
   2   9   1    0.17    0.12 
  -3  -9  -1    0.11    0.10 
  -3  -9  -1   -0.03    0.10 
  -3  -9  -1   -0.07    0.09 
   3   9   1    0.12    0.13 
  -4  -9  -1    0.08    0.11 
  -4  -9  -1   -0.06    0.11 
  -4  -9  -1   -0.04    0.10 
   4   9   1   -0.06    0.14 
  -5  -9  -1    0.30    0.16 
  -5  -9  -1    0.50    0.15 
  -5  -9  -1    0.60    0.19 
   5   9   1    0.75    0.22 
  -6  -9  -1    2.84    0.36 
  -6  -9  -1    2.64    0.34 
  -6  -9  -1    3.51    0.36 
   6   9   1    2.79    0.36 
  -7  -9  -1    0.06    0.14 
  -7  -9  -1    0.08    0.16 
   7   9   1    0.50    0.19 
   7   9   1    0.23    0.23 
   9 -10  -1   -0.26    0.28 
  -9  10   1   -0.13    0.17 
   8 -10  -1    0.31    0.27 
  -8  10   1    0.03    0.18 
   7 -10  -1   -0.04    0.20 
  -7  10   1   -0.02    0.13 
   6 -10  -1    4.29    0.45 
  -6  10   1    3.74    0.34 
   5 -10  -1   -0.17    0.14 
   5 -10  -1    0.07    0.17 
  -5  10   1    0.00    0.13 
   4 -10  -1    0.09    0.17 
   4 -10  -1   -0.06    0.07 
   4 -10  -1   -0.06    0.13 
  -4  10   1   -0.04    0.11 
   3 -10  -1    2.84    0.21 
   3 -10  -1    3.16    0.29 
   3 -10  -1    2.40    0.30 
  -3  10   1    2.74    0.23 
   2 -10  -1    1.30    0.17 
   2 -10  -1    1.19    0.23 
   2 -10  -1    0.96    0.20 
  -2  10   1    0.93    0.15 
   1 -10  -1    0.08    0.13 
   1 -10  -1    0.11    0.09 
   1 -10  -1    0.12    0.14 
  -1  10   1    0.22    0.11 
  -1  10   1    0.21    0.09 
   0 -10  -1    0.80    0.13 
   0 -10  -1    0.82    0.18 
   0 -10  -1    1.12    0.20 
   0  10   1    1.22    0.18 
   0  10   1    1.14    0.13 
  -1 -10  -1    0.28    0.11 
  -1 -10  -1    0.20    0.13 
  -1 -10  -1    0.06    0.11 
   1  10   1    0.00    0.11 
  -2 -10  -1    1.92    0.27 
  -2 -10  -1    1.68    0.25 
  -2 -10  -1    1.89    0.21 
   2  10   1    1.97    0.24 
  -3 -10  -1    0.10    0.11 
  -3 -10  -1   -0.09    0.10 
  -3 -10  -1    0.06    0.12 
   3  10   1    0.15    0.13 
  -4 -10  -1   -0.07    0.11 
  -4 -10  -1    0.10    0.12 
  -4 -10  -1    0.31    0.16 
   4  10   1    0.32    0.17 
  -5 -10  -1    0.13    0.15 
  -5 -10  -1    0.53    0.19 
  -5 -10  -1    0.15    0.17 
   5  10   1    0.54    0.19 
  -6 -10  -1    0.63    0.19 
  -6 -10  -1    0.87    0.22 
  -6 -10  -1    1.11    0.25 
   6  10   1    0.93    0.27 
  -7 -10  -1    5.32    0.44 
  -7 -10  -1    3.90    0.49 
   7  10   1    5.46    0.52 
   7  10   1    6.99    0.44 
   8 -11  -1    0.76    0.33 
  -8  11   1    0.31    0.20 
   7 -11  -1    0.67    0.30 
  -7  11   1    0.63    0.22 
   6 -11  -1   -0.13    0.20 
  -6  11   1    0.09    0.15 
   5 -11  -1    1.76    0.27 
   5 -11  -1    1.54    0.30 
  -5  11   1    1.55    0.23 
   4 -11  -1    3.84    0.39 
   4 -11  -1    3.80    0.33 
  -4  11   1    4.21    0.31 
   3 -11  -1    0.29    0.16 
   3 -11  -1    0.37    0.18 
   3 -11  -1    0.34    0.11 
  -3  11   1    0.42    0.14 
   2 -11  -1    0.72    0.21 
   2 -11  -1    0.68    0.13 
   2 -11  -1    0.83    0.20 
  -2  11   1    0.66    0.14 
   1 -11  -1    2.13    0.28 
   1 -11  -1    1.98    0.25 
  -1  11   1    1.92    0.22 
  -1  11   1    2.15    0.19 
   0 -11  -1    9.32    0.47 
   0 -11  -1    8.49    0.49 
   0  11   1    9.05    0.42 
  -1 -11  -1    0.16    0.12 
  -1 -11  -1    0.17    0.14 
  -1 -11  -1    0.03    0.13 
   1  11   1    0.02    0.11 
  -2 -11  -1   -0.14    0.09 
  -2 -11  -1   -0.15    0.12 
  -2 -11  -1   -0.01    0.11 
   2  11   1    0.06    0.13 
  -3 -11  -1    3.92    0.30 
  -3 -11  -1    4.73    0.37 
  -3 -11  -1    3.74    0.36 
   3  11   1    4.12    0.35 
  -4 -11  -1    0.11    0.14 
  -4 -11  -1   -0.02    0.13 
  -4 -11  -1    0.35    0.15 
   4  11   1    0.28    0.18 
  -5 -11  -1    0.04    0.15 
  -5 -11  -1    0.06    0.14 
  -5 -11  -1    0.00    0.14 
   5  11   1    0.09    0.18 
  -6 -11  -1    0.17    0.16 
  -6 -11  -1    0.69    0.23 
  -6 -11  -1    0.20    0.17 
   6  11   1    0.79    0.25 
   8 -12  -1   -0.05    0.25 
  -8  12   1   -0.07    0.18 
   7 -12  -1    0.16    0.22 
  -7  12   1    0.08    0.15 
   6 -12  -1    0.02    0.22 
  -6  12   1    0.09    0.16 
   5 -12  -1    0.23    0.19 
  -5  12   1   -0.06    0.14 
   4 -12  -1    4.63    0.36 
   4 -12  -1    5.16    0.46 
  -4  12   1    4.13    0.34 
   3 -12  -1    0.05    0.15 
   3 -12  -1    0.14    0.17 
  -3  12   1    0.34    0.15 
   2 -12  -1    1.53    0.28 
   2 -12  -1    1.30    0.23 
  -2  12   1    1.84    0.22 
  -2  12   1    1.36    0.20 
   1 -12  -1    0.30    0.16 
   1 -12  -1    0.36    0.16 
  -1  12   1    0.66    0.14 
  -1  12   1    0.48    0.14 
   0 -12  -1    1.07    0.24 
   0 -12  -1    0.71    0.19 
   0  12   1    0.83    0.18 
  -1 -12  -1   -0.01    0.14 
  -1 -12  -1   -0.09    0.11 
   1  12   1    0.06    0.12 
  -2 -12  -1   -0.08    0.15 
  -2 -12  -1    0.12    0.15 
   2  12   1    0.28    0.15 
  -3 -12  -1    0.13    0.17 
  -3 -12  -1   -0.01    0.12 
  -3 -12  -1    0.25    0.15 
   3  12   1    0.05    0.15 
  -4 -12  -1    1.33    0.27 
  -4 -12  -1    0.76    0.19 
  -4 -12  -1    1.06    0.26 
   4  12   1    1.07    0.24 
  -5 -12  -1    1.24    0.28 
  -5 -12  -1    0.77    0.22 
  -5 -12  -1    1.27    0.24 
   5  12   1    1.45    0.28 
   7 -13  -1   -0.29    0.21 
  -7  13   1    0.12    0.18 
   6 -13  -1    0.37    0.25 
  -6  13   1    0.26    0.17 
   5 -13  -1   -0.10    0.19 
  -5  13   1   -0.09    0.15 
   4 -13  -1    1.66    0.32 
  -4  13   1    1.55    0.26 
   3 -13  -1   -0.05    0.16 
   3 -13  -1    0.05    0.16 
  -3  13   1    0.22    0.14 
   2 -13  -1   -0.04    0.14 
   2 -13  -1    0.02    0.16 
  -2  13   1   -0.03    0.10 
   1 -13  -1    0.31    0.19 
   1 -13  -1    0.12    0.15 
  -1  13   1    0.60    0.16 
   0 -13  -1    0.14    0.16 
   0 -13  -1    0.13    0.16 
   0  13   1   -0.04    0.11 
  -1 -13  -1   -0.04    0.11 
  -1 -13  -1   -0.09    0.14 
   1  13   1    0.10    0.12 
  -2 -13  -1   -0.09    0.13 
  -2 -13  -1   -0.21    0.14 
   2  13   1    0.21    0.15 
  -3 -13  -1    0.47    0.22 
  -3 -13  -1    0.63    0.20 
   3  13   1    0.68    0.20 
  -4 -13  -1    0.19    0.18 
  -4 -13  -1    0.05    0.13 
   4  13   1    0.35    0.16 
   6 -14  -1   -0.06    0.22 
  -6  14   1    0.25    0.19 
   5 -14  -1    1.21    0.31 
  -5  14   1    1.90    0.29 
   4 -14  -1   -0.17    0.17 
  -4  14   1    0.19    0.16 
   3 -14  -1    0.15    0.20 
  -3  14   1   -0.08    0.12 
   2 -14  -1    0.20    0.20 
   2 -14  -1    0.11    0.18 
   1 -14  -1    0.83    0.22 
   1 -14  -1    0.48    0.21 
   0 -14  -1    0.00    0.13 
   0 -14  -1   -0.02    0.16 
   0  14   1    0.28    0.14 
  -1 -14  -1    0.03    0.15 
  -1 -14  -1    0.08    0.16 
   1  14   1    0.28    0.15 
  -2 -14  -1    0.14    0.15 
  -2 -14  -1   -0.06    0.16 
   2  14   1    0.11    0.13 
  -3 -14  -1    0.05    0.15 
  -3 -14  -1   -0.08    0.16 
   3  14   1    0.31    0.16 
   5 -15  -1    0.33    0.23 
  -5  15   1   -0.28    0.14 
   4 -15  -1    0.04    0.19 
  -4  15   1    0.03    0.15 
   3 -15  -1   -0.16    0.13 
   2 -15  -1    0.00    0.16 
   1 -15  -1   -0.06    0.16 
   1 -15  -1   -0.09    0.15 
   0 -15  -1   -0.05    0.15 
   0 -15  -1    0.14    0.18 
  -1 -15  -1   -0.08    0.17 
  -1 -15  -1    0.04    0.15 
   1  15   1    0.29    0.14 
  -2 -15  -1    0.83    0.27 
  -2 -15  -1    0.70    0.23 
   2  15   1    1.36    0.23 
   2 -16  -1    0.23    0.24 
   1  16  -2    0.25    0.14 
  -1 -16   2   -0.13    0.16 
  -1 -16   2   -0.10    0.17 
   0  16  -2    0.47    0.18 
   0 -16   2   -0.09    0.14 
  -1  16  -2    0.26    0.15 
   1 -16   2    0.23    0.18 
   2 -16   2    0.17    0.21 
   3 -16   2   -0.05    0.19 
  -4  16  -2    0.13    0.18 
   4 -16   2    0.03    0.20 
   3  15  -2    1.61    0.29 
  -3 -15   2    1.06    0.29 
  -3 -15   2    0.63    0.24 
   2  15  -2    0.86    0.22 
  -2 -15   2    0.90    0.24 
  -2 -15   2    0.41    0.21 
   1  15  -2    1.21    0.24 
  -1 -15   2    0.48    0.22 
  -1 -15   2    1.13    0.25 
   0  15  -2    0.10    0.15 
   0 -15   2   -0.04    0.13 
   0 -15   2   -0.07    0.15 
  -1  15  -2    1.08    0.23 
   1 -15   2    0.47    0.22 
  -2  15  -2    0.20    0.15 
   2 -15   2    0.19    0.19 
  -3  15  -2    0.12    0.15 
   3 -15   2    0.17    0.20 
  -4  15  -2   -0.29    0.12 
   4 -15   2   -0.20    0.14 
  -5  15  -2    0.91    0.25 
   5 -15   2    0.83    0.30 
  -6  15  -2   -0.17    0.17 
   4  14  -2    0.13    0.18 
  -4 -14   2    0.09    0.15 
  -4 -14   2    0.03    0.16 
   3  14  -2    0.26    0.18 
  -3 -14   2   -0.14    0.15 
  -3 -14   2   -0.03    0.15 
   2  14  -2    3.03    0.36 
  -2 -14   2    3.12    0.36 
  -2 -14   2    3.17    0.42 
   1  14  -2    0.35    0.17 
  -1 -14   2    0.16    0.15 
  -1 -14   2    0.22    0.17 
   0  14  -2    2.14    0.28 
   0 -14   2    2.18    0.34 
   0 -14   2    2.74    0.32 
  -1  14  -2    2.30    0.28 
   1 -14   2    2.02    0.27 
   1 -14   2    2.14    0.35 
  -2  14  -2    2.09    0.27 
  -2  14  -2    1.85    0.24 
   2 -14   2    1.04    0.26 
  -3  14  -2   -0.14    0.11 
   3 -14   2    0.04    0.12 
   3 -14   2   -0.11    0.16 
  -4  14  -2   -0.20    0.12 
   4 -14   2   -0.05    0.17 
  -5  14  -2    0.30    0.19 
   5 -14   2    0.10    0.20 
  -6  14  -2   -0.14    0.16 
   6 -14   2   -0.27    0.16 
  -7  14  -2    0.23    0.19 
   7 -14   2   -0.51    0.19 
   5  13  -2    0.13    0.17 
  -5 -13   2    0.13    0.17 
  -5 -13   2    0.30    0.19 
   4  13  -2    0.22    0.16 
  -4 -13   2    0.18    0.17 
  -4 -13   2    0.09    0.14 
   3  13  -2    0.71    0.21 
  -3 -13   2    0.59    0.21 
  -3 -13   2    0.60    0.20 
   2  13  -2   -0.18    0.12 
  -2 -13   2    0.05    0.15 
  -2 -13   2   -0.07    0.13 
   1  13  -2    0.59    0.18 
  -1 -13   2    0.66    0.20 
  -1 -13   2    0.90    0.23 
   0  13  -2    0.32    0.15 
   0 -13   2    0.95    0.20 
   0 -13   2    0.61    0.21 
  -1  13  -2    0.05    0.12 
   1 -13   2    0.03    0.13 
   1 -13   2   -0.13    0.12 
  -2  13  -2    2.09    0.24 
   2 -13   2    2.42    0.27 
   2 -13   2    2.29    0.26 
   2 -13   2    1.91    0.32 
  -3  13  -2    1.09    0.21 
   3 -13   2    1.02    0.19 
   3 -13   2    0.95    0.25 
  -4  13  -2   -0.11    0.15 
   4 -13   2    0.28    0.13 
   4 -13   2    0.21    0.18 
  -5  13  -2    0.61    0.21 
   5 -13   2    0.87    0.28 
  -6  13  -2   -0.08    0.16 
   6 -13   2    0.08    0.20 
  -7  13  -2    0.16    0.20 
   7 -13   2    0.18    0.28 
   6  12  -2    0.32    0.21 
  -6 -12   2    0.14    0.16 
  -6 -12   2    0.10    0.16 
  -6 -12   2    0.27    0.18 
   5  12  -2   -0.01    0.16 
  -5 -12   2    0.08    0.16 
  -5 -12   2    0.00    0.12 
  -5 -12   2    0.03    0.16 
   4  12  -2    4.56    0.39 
  -4 -12   2    3.62    0.37 
  -4 -12   2    3.87    0.39 
  -4 -12   2    3.77    0.36 
   3  12  -2    2.45    0.31 
  -3 -12   2    2.78    0.33 
  -3 -12   2    2.47    0.35 
   2  12  -2    0.12    0.14 
  -2 -12   2    0.07    0.14 
  -2 -12   2    0.13    0.14 
   1  12  -2    0.04    0.12 
  -1 -12   2    0.18    0.13 
  -1 -12   2   -0.02    0.13 
   0  12  -2    6.71    0.40 
   0 -12   2    7.93    0.42 
   0 -12   2    6.84    0.45 
  -1  12  -2    2.68    0.23 
   1 -12   2    2.75    0.35 
   1 -12   2    2.46    0.25 
   1 -12   2    2.77    0.26 
  -2  12  -2    2.08    0.23 
   2 -12   2    2.21    0.24 
   2 -12   2    2.67    0.33 
   2 -12   2    2.62    0.26 
  -3  12  -2    1.15    0.20 
   3 -12   2    0.98    0.24 
   3 -12   2    1.26    0.20 
   3 -12   2    1.18    0.19 
  -4  12  -2    2.19    0.26 
   4 -12   2    1.82    0.23 
   4 -12   2    1.72    0.31 
  -5  12  -2   -0.04    0.12 
   5 -12   2    0.02    0.18 
   5 -12   2    0.04    0.09 
  -6  12  -2   -0.15    0.15 
   6 -12   2   -0.11    0.19 
  -7  12  -2   -0.25    0.15 
   7 -12   2    0.23    0.26 
  -8  12  -2   -0.10    0.15 
   8 -12   2   -0.04    0.26 
   6  11  -2    0.13    0.17 
  -6 -11   2    0.15    0.15 
  -6 -11   2    0.42    0.20 
  -6 -11   2    0.16    0.16 
   5  11  -2    0.45    0.20 
  -5 -11   2    0.04    0.13 
  -5 -11   2   -0.10    0.13 
  -5 -11   2   -0.01    0.12 
   4  11  -2    0.64    0.20 
  -4 -11   2    0.19    0.13 
  -4 -11   2    0.11    0.13 
  -4 -11   2    0.27    0.16 
   3  11  -2    9.60    0.50 
  -3 -11   2    8.15    0.50 
  -3 -11   2    8.51    0.48 
  -3 -11   2    9.17    0.41 
   2  11  -2    0.13    0.13 
  -2 -11   2   -0.03    0.08 
  -2 -11   2   -0.14    0.11 
  -2 -11   2   -0.05    0.12 
   1  11  -2    1.34    0.20 
  -1 -11   2    2.08    0.29 
  -1 -11   2    1.91    0.25 
   0  11  -2    0.47    0.14 
   0  11  -2    0.55    0.11 
   0 -11   2    0.57    0.15 
   0 -11   2    0.54    0.18 
  -1  11  -2   -0.01    0.09 
   1 -11   2   -0.10    0.09 
   1 -11   2    0.04    0.10 
   1 -11   2   -0.05    0.10 
  -2  11  -2    0.01    0.10 
   2 -11   2   -0.03    0.11 
   2 -11   2    0.04    0.14 
   2 -11   2   -0.03    0.09 
  -3  11  -2    0.27    0.12 
   3 -11   2    0.02    0.13 
   3 -11   2   -0.08    0.08 
   3 -11   2   -0.03    0.11 
  -4  11  -2    0.24    0.13 
   4 -11   2    0.11    0.16 
   4 -11   2    0.39    0.12 
  -5  11  -2    0.08    0.13 
   5 -11   2    0.28    0.21 
   5 -11   2    0.22    0.11 
  -6  11  -2    0.13    0.15 
   6 -11   2    0.12    0.20 
   6 -11   2   -0.08    0.10 
  -7  11  -2    2.42    0.32 
   7 -11   2    1.86    0.37 
  -8  11  -2   -0.13    0.17 
   8 -11   2   -0.40    0.22 
  -9  11  -2    0.24    0.21 
   9 -11   2    0.01    0.28 
   7  10  -2    4.95    0.47 
   7  10  -2    4.72    0.44 
  -7 -10   2    4.70    0.40 
  -7 -10   2    3.40    0.40 
   6  10  -2    0.05    0.16 
  -6 -10   2    0.09    0.14 
  -6 -10   2   -0.01    0.14 
  -6 -10   2    0.04    0.13 
   5  10  -2    0.25    0.18 
  -5 -10   2   -0.17    0.09 
  -5 -10   2   -0.02    0.12 
  -5 -10   2    0.25    0.17 
   4  10  -2   -0.05    0.11 
  -4 -10   2    0.04    0.10 
  -4 -10   2    0.14    0.14 
  -4 -10   2   -0.03    0.11 
   3  10  -2    2.74    0.27 
  -3 -10   2    2.00    0.25 
  -3 -10   2    2.67    0.24 
  -3 -10   2    2.85    0.33 
   2  10  -2    0.55    0.15 
  -2 -10   2    0.75    0.18 
  -2 -10   2    0.93    0.18 
  -2 -10   2    0.78    0.13 
   1  10  -2    0.32    0.13 
  -1 -10   2    0.39    0.13 
  -1 -10   2    0.22    0.09 
  -1 -10   2    0.54    0.17 
   0  10  -2    0.53    0.11 
   0 -10   2    0.78    0.10 
   0 -10   2    0.48    0.13 
   0 -10   2    0.61    0.14 
   0 -10   2    0.34    0.14 
  -1  10  -2    4.62    0.25 
   1 -10   2    4.65    0.34 
   1 -10   2    4.12    0.27 
   1 -10   2    4.43    0.28 
  -2  10  -2    1.05    0.17 
   2 -10   2    0.85    0.15 
   2 -10   2    0.99    0.16 
   2 -10   2    1.20    0.22 
  -3  10  -2    8.66    0.40 
   3 -10   2    8.00    0.37 
   3 -10   2    8.63    0.49 
   3 -10   2    8.59    0.37 
  -4  10  -2    0.83    0.18 
   4 -10   2    0.71    0.22 
   4 -10   2    0.40    0.13 
   4 -10   2    0.88    0.15 
  -5  10  -2   -0.01    0.12 
   5 -10   2    0.20    0.11 
   5 -10   2    0.10    0.18 
  -6  10  -2    4.40    0.36 
   6 -10   2    3.49    0.41 
   6 -10   2    3.70    0.27 
  -7  10  -2   -0.07    0.16 
   7 -10   2   -0.14    0.19 
  -8  10  -2    0.50    0.22 
   8 -10   2   -0.04    0.25 
  -9  10  -2    0.00    0.18 
   9 -10   2   -0.44    0.25 
   8   9  -2    1.03    0.31 
   8   9  -2    1.18    0.25 
  -8  -9   2    0.42    0.23 
  -8  -9   2    0.86    0.23 
   7   9  -2    0.25    0.20 
   7   9  -2    0.30    0.18 
  -7  -9   2    0.04    0.15 
  -7  -9   2    0.19    0.17 
   6   9  -2    0.72    0.23 
  -6  -9   2    0.56    0.20 
  -6  -9   2    0.45    0.19 
  -6  -9   2    1.01    0.21 
   5   9  -2    0.47    0.18 
  -5  -9   2    0.02    0.12 
  -5  -9   2    0.16    0.14 
  -5  -9   2    0.12    0.12 
   4   9  -2    0.25    0.14 
  -4  -9   2    0.20    0.14 
  -4  -9   2    0.32    0.12 
  -4  -9   2    0.14    0.12 
   3   9  -2    0.39    0.14 
  -3  -9   2    0.57    0.13 
  -3  -9   2    0.83    0.18 
  -3  -9   2    0.82    0.18 
   2   9  -2    0.05    0.11 
  -2  -9   2    0.17    0.12 
  -2  -9   2    0.01    0.11 
  -2  -9   2    0.07    0.08 
   1   9  -2    6.89    0.34 
   1   9  -2    6.54    0.24 
  -1  -9   2    6.94    0.35 
  -1  -9   2    6.52    0.27 
  -1  -9   2    6.71    0.39 
   0   9  -2    0.32    0.09 
   0  -9   2    0.27    0.11 
   0  -9   2    0.12    0.11 
   0  -9   2    0.53    0.12 
   0  -9   2    0.40    0.08 
  -1   9  -2    5.88    0.28 
   1  -9   2    6.10    0.36 
   1  -9   2    6.47    0.32 
   1  -9   2    6.45    0.31 
   1  -9   2    6.30    0.21 
  -2   9  -2    5.86    0.30 
   2  -9   2    5.76    0.29 
   2  -9   2    5.00    0.28 
   2  -9   2    5.85    0.36 
  -3   9  -2    2.75    0.23 
   3  -9   2    2.79    0.28 
   3  -9   2    2.70    0.22 
   3  -9   2    2.63    0.22 
  -4   9  -2    0.60    0.16 
   4  -9   2    0.58    0.18 
   4  -9   2    0.68    0.13 
   4  -9   2    0.46    0.13 
  -5   9  -2    5.32    0.34 
   5  -9   2    5.52    0.41 
   5  -9   2    5.21    0.30 
  -6   9  -2    2.81    0.31 
   6  -9   2    2.07    0.34 
   6  -9   2    2.61    0.23 
  -7   9  -2   -0.02    0.15 
   7  -9   2    0.10    0.20 
   7  -9   2   -0.24    0.08 
  -8   9  -2    0.77    0.21 
   8  -9   2    1.16    0.31 
  -9   9  -2    0.00    0.17 
   9  -9   2   -0.29    0.24 
   8   8  -2    0.01    0.21 
   8   8  -2    0.37    0.17 
  -8  -8   2    0.04    0.16 
  -8  -8   2   -0.04    0.13 
   7   8  -2   -0.02    0.17 
   7   8  -2    0.15    0.16 
  -7  -8   2   -0.07    0.14 
  -7  -8   2    0.17    0.15 
   6   8  -2    1.15    0.25 
  -6  -8   2    0.48    0.18 
  -6  -8   2    0.62    0.18 
  -6  -8   2    0.40    0.18 
   5   8  -2    0.15    0.13 
  -5  -8   2    0.09    0.13 
  -5  -8   2    0.27    0.12 
  -5  -8   2    0.09    0.11 
   4   8  -2    3.85    0.31 
  -4  -8   2    3.40    0.30 
  -4  -8   2    3.58    0.31 
  -4  -8   2    3.61    0.27 
   3   8  -2    1.32    0.19 
  -3  -8   2    1.58    0.20 
  -3  -8   2    2.14    0.19 
  -3  -8   2    1.64    0.22 
   2   8  -2    7.02    0.35 
  -2  -8   2    6.85    0.34 
  -2  -8   2    7.29    0.31 
  -2  -8   2    7.36    0.38 
   1   8  -2    0.57    0.12 
   1   8  -2    0.63    0.08 
  -1  -8   2    0.61    0.13 
  -1  -8   2    0.54    0.09 
  -1  -8   2    0.50    0.15 
   0   8  -2    0.07    0.07 
   0  -8   2    0.24    0.10 
   0  -8   2    0.32    0.12 
   0  -8   2    0.18    0.09 
   0  -8   2    0.10    0.06 
  -1   8  -2   12.34    0.40 
   1  -8   2   12.38    0.49 
   1  -8   2   12.84    0.42 
   1  -8   2   12.66    0.44 
   1  -8   2   13.11    0.33 
  -2   8  -2    4.28    0.25 
   2  -8   2    4.22    0.24 
   2  -8   2    4.18    0.14 
   2  -8   2    4.13    0.29 
   2  -8   2    3.81    0.23 
  -3   8  -2    0.98    0.16 
   3  -8   2    1.17    0.21 
   3  -8   2    1.25    0.15 
   3  -8   2    1.06    0.14 
  -4   8  -2   -0.19    0.10 
   4  -8   2   -0.03    0.10 
   4  -8   2    0.01    0.08 
   4  -8   2    0.04    0.13 
  -5   8  -2   -0.04    0.12 
   5  -8   2    0.12    0.16 
   5  -8   2   -0.09    0.10 
   5  -8   2    0.03    0.08 
  -6   8  -2    7.87    0.42 
   6  -8   2    9.00    0.51 
   6  -8   2    8.37    0.39 
  -7   8  -2    0.89    0.21 
   7  -8   2    0.90    0.17 
   7  -8   2    0.67    0.27 
  -8   8  -2    2.35    0.30 
   8  -8   2    2.27    0.27 
   8  -8   2    2.53    0.40 
  -9   8  -2    0.00    0.16 
   9  -8   2    0.16    0.29 
 -10   8  -2    0.26    0.19 
  10  -8   2   -0.22    0.25 
   9   7  -2    0.04    0.26 
  -9  -7   2    0.28    0.24 
  -9  -7   2   -0.22    0.23 
   8   7  -2    5.70    0.47 
   8   7  -2    5.23    0.49 
  -8  -7   2    6.14    0.45 
  -8  -7   2    5.54    0.43 
   7   7  -2    0.19    0.20 
   7   7  -2    0.45    0.18 
  -7  -7   2    0.13    0.14 
  -7  -7   2    0.12    0.13 
   6   7  -2    2.18    0.30 
   6   7  -2    2.48    0.33 
  -6  -7   2    2.56    0.31 
  -6  -7   2    1.97    0.28 
  -6  -7   2    1.88    0.25 
   5   7  -2    6.29    0.39 
  -5  -7   2    6.47    0.39 
  -5  -7   2    5.69    0.38 
  -5  -7   2    5.84    0.35 
   4   7  -2    1.02    0.17 
  -4  -7   2    0.82    0.18 
  -4  -7   2    1.09    0.16 
  -4  -7   2    1.09    0.19 
   3   7  -2    3.21    0.25 
  -3  -7   2    2.73    0.25 
  -3  -7   2    2.66    0.23 
  -3  -7   2    2.95    0.21 
   2   7  -2   -0.04    0.03 
   2   7  -2   -0.14    0.07 
  -2  -7   2    0.20    0.10 
  -2  -7   2    0.04    0.10 
  -2  -7   2    0.07    0.07 
   1   7  -2    2.07    0.19 
   1   7  -2    1.95    0.12 
  -1  -7   2    2.40    0.22 
  -1  -7   2    2.29    0.15 
  -1  -7   2    1.99    0.18 
   0   7  -2    0.51    0.09 
   0  -7   2    0.45    0.13 
   0  -7   2    0.44    0.07 
   0  -7   2    0.24    0.09 
   0  -7   2    0.18    0.09 
  -1   7  -2   29.87    0.72 
   1  -7   2   28.37    0.81 
   1  -7   2   29.55    0.73 
   1  -7   2   29.84    0.63 
   1  -7   2   28.17    0.75 
  -2   7  -2   29.98    0.76 
   2  -7   2   30.48    0.63 
   2  -7   2   29.61    0.76 
   2  -7   2   29.19    0.72 
   2  -7   2   30.75    0.86 
  -3   7  -2    9.14    0.36 
   3  -7   2    9.26    0.35 
   3  -7   2    9.07    0.32 
   3  -7   2    8.71    0.41 
   3  -7   2    9.15    0.24 
  -4   7  -2    2.23    0.21 
   4  -7   2    2.41    0.20 
   4  -7   2    2.19    0.26 
   4  -7   2    2.21    0.18 
  -5   7  -2    1.13    0.11 
  -5   7  -2    1.08    0.18 
   5  -7   2    0.84    0.21 
   5  -7   2    0.96    0.15 
   5  -7   2    1.12    0.15 
  -6   7  -2    0.63    0.15 
   6  -7   2    0.61    0.13 
   6  -7   2    0.34    0.12 
   6  -7   2    0.45    0.22 
  -7   7  -2   -0.10    0.12 
   7  -7   2   -0.07    0.21 
   7  -7   2    0.00    0.10 
  -8   7  -2    0.08    0.16 
   8  -7   2    0.22    0.15 
   8  -7   2    0.43    0.26 
  -9   7  -2    0.08    0.16 
   9  -7   2    0.14    0.30 
 -10   7  -2   -0.10    0.16 
  10  -7   2   -0.18    0.28 
   9   6  -2    1.98    0.33 
   9   6  -2    1.27    0.33 
  -9  -6   2    1.13    0.25 
  -9  -6   2    0.89    0.23 
   8   6  -2    0.92    0.28 
   8   6  -2    0.85    0.24 
  -8  -6   2    1.00    0.22 
  -8  -6   2    0.48    0.19 
   7   6  -2    7.35    0.47 
   7   6  -2    7.55    0.49 
  -7  -6   2    7.73    0.47 
  -7  -6   2    7.55    0.45 
   6   6  -2    3.30    0.32 
   6   6  -2    2.73    0.31 
  -6  -6   2    3.02    0.30 
  -6  -6   2    2.01    0.25 
   5   6  -2    0.22    0.14 
  -5  -6   2    0.24    0.12 
  -5  -6   2    0.28    0.13 
  -5  -6   2    0.27    0.12 
   4   6  -2    0.73    0.16 
  -4  -6   2    0.72    0.15 
  -4  -6   2    0.71    0.14 
  -4  -6   2    0.88    0.16 
   3   6  -2   -0.13    0.07 
  -3  -6   2   -0.05    0.08 
  -3  -6   2   -0.04    0.07 
  -3  -6   2    0.11    0.09 
   2   6  -2   10.11    0.38 
   2   6  -2   10.80    0.24 
  -2  -6   2   10.56    0.35 
  -2  -6   2   10.25    0.41 
  -2  -6   2    9.95    0.38 
   1   6  -2    2.36    0.12 
  -1  -6   2    2.29    0.14 
  -1  -6   2    2.35    0.18 
  -1  -6   2    2.46    0.19 
  -1  -6   2    2.78    0.18 
   0   6  -2    7.19    0.24 
   0  -6   2    7.31    0.27 
   0  -6   2    7.30    0.22 
   0  -6   2    7.50    0.28 
   0  -6   2    7.08    0.31 
  -1   6  -2    7.90    0.28 
   1  -6   2    8.06    0.34 
   1  -6   2    8.52    0.28 
   1  -6   2    8.62    0.31 
   1  -6   2    8.55    0.21 
  -2   6  -2    2.35    0.18 
   2  -6   2    2.19    0.16 
   2  -6   2    2.03    0.20 
   2  -6   2    2.23    0.16 
   2  -6   2    2.21    0.09 
  -3   6  -2    4.98    0.25 
   3  -6   2    4.97    0.16 
   3  -6   2    4.83    0.22 
   3  -6   2    5.15    0.24 
   3  -6   2    5.02    0.30 
  -4   6  -2    4.43    0.27 
  -4   6  -2    4.92    0.18 
   4  -6   2    4.52    0.34 
   4  -6   2    4.61    0.25 
   4  -6   2    4.96    0.22 
  -5   6  -2    0.04    0.10 
  -5   6  -2    0.05    0.05 
   5  -6   2   -0.04    0.08 
   5  -6   2   -0.07    0.14 
   5  -6   2   -0.05    0.08 
  -6   6  -2    0.28    0.08 
  -6   6  -2    0.24    0.13 
   6  -6   2    0.46    0.11 
   6  -6   2    0.22    0.11 
   6  -6   2    0.09    0.18 
  -7   6  -2    0.56    0.12 
  -7   6  -2    0.36    0.16 
   7  -6   2    0.46    0.15 
   7  -6   2    0.86    0.26 
  -8   6  -2    1.51    0.23 
   8  -6   2    1.14    0.29 
   8  -6   2    1.84    0.25 
  -9   6  -2    1.00    0.22 
   9  -6   2    0.99    0.32 
   9  -6   2    0.83    0.22 
 -10   6  -2   -0.13    0.15 
  10  -6   2   -0.53    0.27 
   9   5  -2    2.53    0.39 
   9   5  -2    2.23    0.34 
  -9  -5   2    1.42    0.27 
  -9  -5   2    1.92    0.30 
   8   5  -2    1.45    0.28 
   8   5  -2    1.53    0.31 
  -8  -5   2    1.36    0.25 
  -8  -5   2    0.95    0.22 
   7   5  -2    2.82    0.33 
   7   5  -2    2.85    0.35 
  -7  -5   2    2.41    0.30 
  -7  -5   2    2.26    0.28 
   6   5  -2    1.10    0.20 
   6   5  -2    1.42    0.24 
  -6  -5   2    1.81    0.25 
  -6  -5   2    1.28    0.19 
   5   5  -2    0.10    0.11 
  -5  -5   2   -0.03    0.08 
  -5  -5   2    0.10    0.10 
  -5  -5   2    0.01    0.09 
   4   5  -2    6.37    0.33 
  -4  -5   2    6.83    0.36 
  -4  -5   2    6.92    0.34 
  -4  -5   2    7.42    0.32 
   3   5  -2    3.02    0.21 
  -3  -5   2    3.29    0.20 
  -3  -5   2    3.10    0.22 
  -3  -5   2    2.86    0.22 
   2   5  -2    2.66    0.08 
   2   5  -2    2.56    0.18 
  -2  -5   2    2.67    0.19 
  -2  -5   2    2.85    0.17 
   1   5  -2    4.45    0.15 
  -1  -5   2    4.71    0.18 
  -1  -5   2    4.62    0.21 
  -1  -5   2    4.26    0.23 
  -1  -5   2    4.68    0.21 
   0   5  -2    2.16    0.13 
   0  -5   2    2.31    0.16 
   0  -5   2    2.28    0.11 
   0  -5   2    2.52    0.17 
   0  -5   2    2.14    0.14 
  -1   5  -2    0.38    0.09 
   1  -5   2    0.58    0.05 
   1  -5   2    0.52    0.08 
   1  -5   2    0.46    0.09 
   1  -5   2    0.65    0.12 
  -2   5  -2    1.52    0.14 
   2  -5   2    1.40    0.16 
   2  -5   2    1.61    0.07 
   2  -5   2    1.61    0.13 
   2  -5   2    1.81    0.14 
  -3   5  -2    0.10    0.08 
  -3   5  -2    0.14    0.04 
   3  -5   2    0.19    0.07 
   3  -5   2    0.21    0.12 
   3  -5   2    0.21    0.08 
  -4   5  -2    1.91    0.12 
  -4   5  -2    1.61    0.16 
   4  -5   2    2.12    0.22 
   4  -5   2    1.98    0.14 
   4  -5   2    1.92    0.17 
  -5   5  -2   11.48    0.36 
  -5   5  -2   11.74    0.44 
   5  -5   2   11.12    0.37 
   5  -5   2   11.04    0.42 
   5  -5   2   11.89    0.52 
  -6   5  -2    0.52    0.14 
  -6   5  -2    0.66    0.11 
   6  -5   2    0.56    0.20 
   6  -5   2    0.47    0.14 
   6  -5   2    0.77    0.12 
  -7   5  -2    0.07    0.08 
  -7   5  -2   -0.19    0.11 
   7  -5   2    0.07    0.18 
   7  -5   2    0.08    0.08 
   7  -5   2   -0.04    0.11 
  -8   5  -2    1.83    0.21 
  -8   5  -2    1.40    0.21 
   8  -5   2    1.81    0.34 
   8  -5   2    1.80    0.25 
  -9   5  -2    0.73    0.16 
  -9   5  -2    0.36    0.16 
   9  -5   2    0.23    0.29 
   9  -5   2    0.73    0.21 
  10  -5   2    0.38    0.22 
  10  -5   2    0.39    0.33 
  10   4  -2    0.40    0.21 
  10   4  -2    0.00    0.24 
 -10  -4   2   -0.20    0.13 
   9   4  -2    5.08    0.48 
   9   4  -2    4.80    0.46 
  -9  -4   2    4.36    0.39 
  -9  -4   2    4.25    0.40 
   8   4  -2    1.81    0.31 
   8   4  -2    1.16    0.27 
  -8  -4   2    0.90    0.20 
  -8  -4   2    1.22    0.23 
   7   4  -2    1.25    0.25 
   7   4  -2    1.22    0.25 
  -7  -4   2    0.89    0.19 
  -7  -4   2    1.09    0.20 
   6   4  -2    4.31    0.33 
   6   4  -2    4.36    0.33 
  -6  -4   2    5.05    0.33 
  -6  -4   2    5.07    0.33 
   5   4  -2    1.95    0.24 
   5   4  -2    1.96    0.23 
  -5  -4   2    1.62    0.21 
  -5  -4   2    1.39    0.18 
   4   4  -2    0.39    0.12 
  -4  -4   2    0.29    0.10 
  -4  -4   2    0.31    0.12 
  -4  -4   2    0.18    0.09 
   3   4  -2    0.57    0.12 
  -3  -4   2    0.60    0.10 
  -3  -4   2    0.49    0.10 
  -3  -4   2    0.60    0.13 
   2   4  -2    9.59    0.33 
  -2  -4   2    9.83    0.34 
  -2  -4   2    9.88    0.36 
  -2  -4   2   10.16    0.31 
   1   4  -2    1.61    0.08 
  -1  -4   2    1.66    0.13 
  -1  -4   2    1.51    0.10 
  -1  -4   2    1.67    0.14 
  -1  -4   2    1.76    0.13 
   0   4  -2   13.68    0.34 
   0  -4   2   14.01    0.32 
   0  -4   2   13.88    0.40 
   0  -4   2   13.96    0.38 
   0  -4   2   13.72    0.36 
  -1   4  -2  102.20    2.09 
   1  -4   2  104.56    2.15 
   1  -4   2  102.10    2.06 
   1  -4   2  103.27    2.00 
   1  -4   2  103.38    2.11 
  -2   4  -2   16.83    0.46 
  -2   4  -2   17.35    0.38 
   2  -4   2   17.85    0.46 
   2  -4   2   18.01    0.51 
   2  -4   2   18.09    0.42 
  -3   4  -2    5.89    0.19 
  -3   4  -2    5.72    0.24 
   3  -4   2    5.65    0.20 
   3  -4   2    5.64    0.28 
   3  -4   2    5.79    0.24 
  -4   4  -2    1.00    0.10 
  -4   4  -2    1.09    0.14 
   4  -4   2    1.13    0.13 
   4  -4   2    1.16    0.11 
   4  -4   2    1.13    0.18 
  -5   4  -2    3.38    0.19 
  -5   4  -2    3.98    0.24 
   5  -4   2    3.81    0.20 
   5  -4   2    3.48    0.23 
   5  -4   2    3.65    0.30 
  -6   4  -2    0.95    0.14 
  -6   4  -2    0.84    0.15 
  -6   4  -2    1.17    0.14 
   6  -4   2    1.10    0.19 
   6  -4   2    0.95    0.22 
  -7   4  -2    0.08    0.08 
  -7   4  -2    0.09    0.11 
  -7   4  -2    0.04    0.09 
   7  -4   2    0.05    0.20 
   7  -4   2    0.25    0.14 
  -8   4  -2    1.39    0.20 
  -8   4  -2    1.24    0.18 
   8  -4   2    1.88    0.32 
   8  -4   2    1.37    0.24 
  -9   4  -2    0.09    0.10 
  -9   4  -2   -0.06    0.12 
   9  -4   2    0.01    0.17 
   9  -4   2    0.19    0.22 
 -10   4  -2    0.00    0.10 
  10  -4   2   -0.14    0.17 
  10  -4   2   -0.27    0.26 
  10   3  -2    0.33    0.28 
  10   3  -2    1.20    0.29 
 -10  -3   2    0.84    0.22 
 -10  -3   2    0.57    0.21 
   9   3  -2    0.32    0.25 
   9   3  -2    0.24    0.18 
  -9  -3   2    0.28    0.16 
  -9  -3   2   -0.13    0.12 
   8   3  -2    0.38    0.17 
   8   3  -2    0.31    0.19 
  -8  -3   2    0.50    0.18 
  -8  -3   2    0.35    0.16 
   7   3  -2    0.29    0.17 
   7   3  -2    0.47    0.18 
  -7  -3   2    0.48    0.15 
  -7  -3   2    0.69    0.17 
   6   3  -2    1.49    0.23 
   6   3  -2    1.76    0.24 
  -6  -3   2    1.68    0.22 
  -6  -3   2    2.04    0.23 
   5   3  -2   20.74    0.65 
   5   3  -2   20.88    0.69 
  -5  -3   2   21.73    0.67 
  -5  -3   2   21.21    0.65 
   4   3  -2    1.23    0.15 
  -4  -3   2    1.61    0.07 
  -4  -3   2    1.41    0.18 
  -4  -3   2    1.45    0.16 
  -4  -3   2    1.59    0.17 
   3   3  -2    1.47    0.14 
  -3  -3   2    1.70    0.06 
  -3  -3   2    1.61    0.15 
  -3  -3   2    1.60    0.15 
  -3  -3   2    1.57    0.14 
   2   3  -2    3.42    0.18 
   2   3  -2    3.84    0.09 
  -2  -3   2    3.67    0.19 
  -2  -3   2    3.63    0.19 
  -2  -3   2    3.79    0.17 
   1   3  -2    9.69    0.22 
  -1  -3   2    9.49    0.29 
  -1  -3   2    9.53    0.28 
  -1  -3   2    9.53    0.30 
  -1  -3   2    9.33    0.26 
   0   3  -2   40.88    0.85 
   0  -3   2   41.51    0.88 
   0  -3   2   40.89    0.85 
   0  -3   2   40.01    0.82 
   0  -3   2   41.02    0.90 
  -1   3  -2   24.07    0.56 
   1  -3   2   24.72    0.57 
   1  -3   2   25.62    0.60 
   1  -3   2   24.37    0.52 
  -2   3  -2    0.07    0.03 
  -2   3  -2    0.03    0.07 
   2  -3   2    0.04    0.07 
   2  -3   2    0.02    0.04 
   2  -3   2    0.08    0.10 
  -3   3  -2    7.95    0.23 
  -3   3  -2    7.90    0.28 
  -3   3  -2    7.36    0.23 
   3  -3   2    8.38    0.34 
   3  -3   2    7.68    0.28 
  -4   3  -2    1.28    0.12 
  -4   3  -2    1.33    0.14 
  -4   3  -2    1.34    0.11 
   4  -3   2    1.38    0.18 
   4  -3   2    1.30    0.15 
  -5   3  -2    0.80    0.11 
  -5   3  -2    0.92    0.14 
  -5   3  -2    0.84    0.12 
   5  -3   2    0.79    0.14 
   5  -3   2    1.08    0.20 
  -6   3  -2    5.36    0.27 
  -6   3  -2    4.84    0.27 
  -6   3  -2    5.06    0.27 
   6  -3   2    5.08    0.38 
   6  -3   2    4.61    0.31 
  -7   3  -2    2.78    0.23 
  -7   3  -2    2.56    0.24 
  -7   3  -2    2.94    0.23 
   7  -3   2    2.67    0.33 
   7  -3   2    3.00    0.29 
  -8   3  -2    0.97    0.18 
  -8   3  -2    1.19    0.18 
  -8   3  -2    0.78    0.16 
   8  -3   2    0.94    0.28 
   8  -3   2    0.88    0.22 
  -9   3  -2    0.17    0.12 
   9  -3   2    0.27    0.19 
   9  -3   2    0.37    0.27 
 -10   3  -2    0.19    0.14 
  10  -3   2    0.37    0.29 
  10  -3   2    0.43    0.24 
  10   2  -2    4.52    0.47 
  10   2  -2    4.65    0.50 
 -10  -2   2    3.32    0.40 
 -10  -2   2    2.90    0.35 
   9   2  -2    0.37    0.20 
   9   2  -2    0.04    0.21 
  -9  -2   2    0.28    0.16 
  -9  -2   2    0.28    0.16 
   8   2  -2    1.21    0.27 
   8   2  -2    0.67    0.23 
  -8  -2   2    0.90    0.19 
  -8  -2   2    0.54    0.16 
   7   2  -2   -0.14    0.13 
   7   2  -2   -0.01    0.13 
  -7  -2   2    0.17    0.12 
  -7  -2   2    0.01    0.10 
   6   2  -2    3.31    0.28 
   6   2  -2    2.44    0.28 
  -6  -2   2    2.70    0.25 
  -6  -2   2    2.52    0.23 
   5   2  -2    0.11    0.12 
   5   2  -2    0.13    0.12 
  -5  -2   2    0.05    0.10 
  -5  -2   2    0.11    0.05 
  -5  -2   2    0.09    0.08 
   4   2  -2    1.25    0.15 
   4   2  -2    1.57    0.16 
  -4  -2   2    1.23    0.14 
  -4  -2   2    1.39    0.08 
  -4  -2   2    0.95    0.12 
   3   2  -2    1.15    0.12 
  -3  -2   2    1.62    0.15 
  -3  -2   2    1.29    0.14 
  -3  -2   2    1.66    0.14 
  -3  -2   2    1.57    0.08 
   2   2  -2    1.49    0.12 
  -2  -2   2    1.59    0.13 
  -2  -2   2    1.51    0.11 
  -2  -2   2    1.65    0.07 
  -1  -2   2   55.47    1.14 
  -1  -2   2   54.33    1.09 
  -1  -2   2   55.39    1.13 
  -1  -2   2   54.72    1.16 
  -1  -2   2   55.02    1.14 
   0   2  -2    2.25    0.09 
   0  -2   2    2.26    0.07 
   0  -2   2    2.33    0.11 
   0  -2   2    2.39    0.10 
   0  -2   2    2.37    0.09 
  -1   2  -2    3.33    0.09 
  -1   2  -2    2.99    0.13 
   1  -2   2    3.27    0.14 
   1  -2   2    3.48    0.09 
   1  -2   2    3.39    0.10 
   1  -2   2    3.43    0.14 
   1  -2   2    3.17    0.09 
  -2   2  -2    1.13    0.07 
  -2   2  -2    1.13    0.10 
  -2   2  -2    1.10    0.08 
   2  -2   2    1.16    0.11 
   2  -2   2    1.39    0.14 
  -3   2  -2   17.43    0.44 
  -3   2  -2   18.04    0.46 
  -3   2  -2   17.27    0.43 
   3  -2   2   17.83    0.49 
   3  -2   2   17.48    0.50 
  -4   2  -2    0.35    0.08 
  -4   2  -2    0.18    0.06 
  -4   2  -2    0.25    0.08 
   4  -2   2    0.36    0.13 
   4  -2   2    0.31    0.11 
  -5   2  -2    8.89    0.33 
  -5   2  -2    9.37    0.34 
  -5   2  -2    9.80    0.35 
   5  -2   2    9.39    0.39 
   5  -2   2    9.69    0.42 
  -6   2  -2    0.77    0.13 
  -6   2  -2    0.59    0.12 
  -6   2  -2    0.63    0.12 
   6  -2   2    0.87    0.19 
   6  -2   2    0.62    0.18 
  -7   2  -2    0.04    0.09 
  -7   2  -2    0.04    0.08 
  -7   2  -2   -0.12    0.09 
   7  -2   2    0.03    0.15 
   7  -2   2    0.17    0.15 
  -8   2  -2    2.80    0.26 
  -8   2  -2    2.42    0.22 
  -8   2  -2    2.65    0.24 
   8  -2   2    2.77    0.37 
   8  -2   2    3.01    0.34 
  -9   2  -2   -0.08    0.10 
   9  -2   2   -0.20    0.22 
   9  -2   2   -0.31    0.16 
 -10   2  -2    1.26    0.23 
  10  -2   2    0.90    0.28 
  10  -2   2    1.68    0.38 
  10   1  -2    3.47    0.43 
  10   1  -2    3.29    0.44 
 -10  -1   2    3.29    0.39 
 -10  -1   2    3.51    0.38 
   9   1  -2    1.14    0.30 
   9   1  -2    1.28    0.29 
  -9  -1   2    1.61    0.27 
  -9  -1   2    1.39    0.24 
   8   1  -2   -0.07    0.17 
   8   1  -2    0.04    0.18 
  -8  -1   2   -0.03    0.10 
  -8  -1   2   -0.05    0.10 
   7   1  -2    2.56    0.31 
   7   1  -2    2.71    0.30 
  -7  -1   2    2.87    0.25 
  -7  -1   2    3.13    0.27 
   6   1  -2    3.02    0.28 
   6   1  -2    3.63    0.29 
  -6  -1   2    3.33    0.17 
  -6  -1   2    3.41    0.26 
  -6  -1   2    3.25    0.25 
   5   1  -2    3.30    0.25 
   5   1  -2    3.08    0.23 
  -5  -1   2    3.18    0.16 
  -5  -1   2    3.22    0.22 
  -5  -1   2    3.12    0.22 
   4   1  -2    0.29    0.11 
   4   1  -2    0.35    0.09 
  -4  -1   2    0.19    0.08 
  -4  -1   2    0.43    0.06 
  -4  -1   2    0.24    0.08 
   3   1  -2    6.55    0.25 
   3   1  -2    7.01    0.28 
  -3  -1   2    7.12    0.26 
  -3  -1   2    7.03    0.20 
  -3  -1   2    7.03    0.27 
   2   1  -2    6.91    0.22 
   2   1  -2    6.87    0.25 
  -2  -1   2    7.04    0.23 
  -2  -1   2    7.19    0.19 
  -2  -1   2    7.00    0.23 
  -2  -1   2    6.90    0.25 
   1   1  -2   19.36    0.42 
  -1  -1   2   19.04    0.43 
  -1  -1   2   18.98    0.43 
  -1  -1   2   18.74    0.44 
  -1  -1   2   19.39    0.41 
   0   1  -2    2.32    0.09 
   0  -1   2    2.32    0.07 
   0  -1   2    2.36    0.08 
   0  -1   2    2.28    0.09 
   0  -1   2    2.35    0.08 
   0  -1   2    2.44    0.07 
  -1   1  -2  212.93    4.26 
  -1   1  -2  210.74    4.21 
  -1   1  -2  220.90    4.21 
   1  -1   2  213.08    4.19 
   1  -1   2  206.44    4.27 
   1  -1   2  222.75    4.23 
  -2   1  -2   12.74    0.32 
  -2   1  -2   12.17    0.30 
  -2   1  -2   12.37    0.31 
   2  -1   2   12.00    0.33 
   2  -1   2   12.01    0.34 
  -3   1  -2    1.39    0.11 
  -3   1  -2    1.35    0.12 
  -3   1  -2    1.44    0.11 
   3  -1   2    1.55    0.15 
   3  -1   2    1.33    0.15 
  -4   1  -2    8.90    0.31 
  -4   1  -2    8.93    0.30 
  -4   1  -2    8.92    0.29 
   4  -1   2    8.90    0.35 
   4  -1   2    9.39    0.35 
  -5   1  -2   10.21    0.34 
  -5   1  -2   10.49    0.37 
  -5   1  -2   10.92    0.39 
   5  -1   2   10.72    0.43 
   5  -1   2   10.85    0.43 
  -6   1  -2    0.48    0.12 
  -6   1  -2    0.37    0.11 
  -6   1  -2    0.45    0.10 
   6  -1   2    0.71    0.19 
   6  -1   2    0.48    0.17 
  -7   1  -2    0.10    0.09 
  -7   1  -2   -0.02    0.10 
  -7   1  -2    0.02    0.08 
   7  -1   2    0.12    0.16 
   7  -1   2    0.20    0.17 
  -8   1  -2   -0.01    0.10 
  -8   1  -2    0.21    0.13 
   8  -1   2   -0.02    0.17 
   8  -1   2   -0.01    0.18 
  -9   1  -2    0.12    0.12 
  -9   1  -2    0.09    0.12 
   9  -1   2    0.20    0.21 
   9  -1   2   -0.22    0.19 
 -10   1  -2    0.25    0.15 
  10  -1   2   -0.13    0.23 
  10  -1   2    0.04    0.24 
  10   0  -2    2.20    0.36 
  10   0  -2    2.24    0.41 
 -10   0   2    3.20    0.37 
 -10   0   2    2.13    0.32 
   9   0  -2   -0.27    0.17 
   9   0  -2    0.06    0.19 
  -9   0   2    0.12    0.14 
  -9   0   2    0.12    0.14 
   8   0  -2    0.91    0.25 
   8   0  -2    0.88    0.22 
  -8   0   2    1.09    0.20 
  -8   0   2    1.24    0.22 
   7   0  -2    0.65    0.19 
   7   0  -2    0.42    0.17 
  -7   0   2    0.44    0.14 
  -7   0   2    0.50    0.13 
  -7   0   2    0.48    0.10 
   6   0  -2    2.17    0.26 
   6   0  -2    2.12    0.23 
  -6   0   2    2.08    0.22 
  -6   0   2    2.04    0.20 
  -6   0   2    1.91    0.15 
   5   0  -2    1.78    0.18 
   5   0  -2    1.79    0.21 
  -5   0   2    1.83    0.14 
  -5   0   2    1.66    0.17 
  -5   0   2    1.76    0.19 
   4   0  -2    4.95    0.27 
   4   0  -2    4.99    0.24 
  -4   0   2    5.14    0.25 
  -4   0   2    5.48    0.20 
  -4   0   2    5.51    0.25 
   3   0  -2    5.90    0.22 
   3   0  -2    6.02    0.26 
  -3   0   2    6.14    0.20 
  -3   0   2    6.22    0.24 
  -3   0   2    6.04    0.23 
   2   0  -2    1.40    0.12 
   2   0  -2    1.43    0.10 
  -2   0   2    1.47    0.09 
  -2   0   2    1.50    0.11 
   1   0  -2  118.44    2.33 
   1   0  -2  117.34    2.34 
  -1   0   2  117.34    2.32 
  -1   0   2  119.11    2.33 
  -1   0   2  116.77    2.33 
   0   0  -2    0.77    0.05 
   0   0  -2    0.86    0.05 
   0   0  -2    0.58    0.03 
   0   0   2    0.59    0.03 
   0   0   2    0.48    0.04 
   0   0   2    0.65    0.04 
  -1   0  -2   17.03    0.37 
  -1   0  -2   16.91    0.38 
  -1   0  -2   16.54    0.38 
   1   0   2   16.65    0.37 
   1   0   2   16.80    0.40 
  -2   0  -2   26.80    0.58 
  -2   0  -2   26.77    0.60 
  -2   0  -2   26.64    0.61 
   2   0   2   26.79    0.61 
   2   0   2   26.90    0.63 
  -3   0  -2    1.33    0.10 
  -3   0  -2    1.15    0.12 
  -3   0  -2    1.33    0.12 
   3   0   2    1.21    0.14 
   3   0   2    1.38    0.14 
  -4   0  -2    1.57    0.12 
  -4   0  -2    1.23    0.13 
  -4   0  -2    1.56    0.15 
   4   0   2    1.85    0.19 
   4   0   2    1.50    0.17 
  -5   0  -2    0.50    0.11 
  -5   0  -2    0.59    0.11 
  -5   0  -2    0.63    0.10 
   5   0   2    0.53    0.16 
   5   0   2    0.65    0.15 
  -6   0  -2    0.23    0.08 
  -6   0  -2    0.15    0.09 
  -6   0  -2    0.39    0.11 
   6   0   2    0.27    0.17 
   6   0   2    0.26    0.15 
  -7   0  -2    0.46    0.13 
  -7   0  -2    0.52    0.14 
   7   0   2    0.59    0.18 
   7   0   2    0.55    0.19 
  -8   0  -2    0.07    0.10 
  -8   0  -2    0.13    0.11 
   8   0   2   -0.13    0.17 
   8   0   2    0.09    0.15 
  -9   0  -2    0.05    0.11 
  -9   0  -2   -0.09    0.11 
   9   0   2    0.10    0.21 
   9   0   2   -0.23    0.19 
 -10   0  -2   -0.08    0.12 
  10   0   2    0.23    0.26 
  10   0   2   -0.25    0.22 
  10  -1  -2   -0.29    0.22 
  10  -1  -2    0.54    0.27 
 -10   1   2    0.47    0.18 
 -10   1   2    0.11    0.16 
   9  -1  -2    0.21    0.25 
   9  -1  -2   -0.11    0.16 
  -9   1   2    0.15    0.13 
  -9   1   2    0.16    0.14 
   8  -1  -2    1.99    0.28 
   8  -1  -2    2.11    0.34 
  -8   1   2    2.11    0.26 
  -8   1   2    1.95    0.26 
   7  -1  -2   -0.04    0.14 
   7  -1  -2    0.16    0.16 
  -7   1   2    0.15    0.11 
  -7   1   2    0.07    0.08 
  -7   1   2    0.01    0.09 
   6  -1  -2    0.23    0.13 
   6  -1  -2    0.21    0.15 
  -6   1   2    0.37    0.11 
  -6   1   2    0.14    0.09 
  -6   1   2    0.47    0.10 
   5  -1  -2    4.77    0.26 
   5  -1  -2    4.54    0.30 
  -5   1   2    4.76    0.22 
  -5   1   2    5.19    0.26 
  -5   1   2    5.39    0.27 
   4  -1  -2    0.51    0.13 
   4  -1  -2    0.59    0.11 
  -4   1   2    0.62    0.10 
  -4   1   2    0.71    0.11 
  -4   1   2    0.61    0.09 
   3  -1  -2   19.05    0.47 
   3  -1  -2   19.51    0.54 
  -3   1   2   18.72    0.50 
  -3   1   2   19.00    0.49 
  -3   1   2   19.59    0.48 
   2  -1  -2   10.01    0.31 
   2  -1  -2   10.41    0.26 
  -2   1   2   10.18    0.28 
  -2   1   2   10.04    0.29 
  -2   1   2   10.03    0.28 
   1  -1  -2   -0.04    0.06 
   1  -1  -2   -0.05    0.05 
   1  -1  -2    0.05    0.02 
  -1   1   2    0.02    0.02 
  -1   1   2    0.03    0.03 
  -1   1   2    0.03    0.04 
   0  -1  -2   28.97    0.63 
   0  -1  -2   28.18    0.62 
   0  -1  -2   29.27    0.64 
   0   1   2   31.14    0.62 
   0   1   2   31.21    0.61 
  -1  -1  -2    0.41    0.06 
   1   1   2    0.44    0.05 
  -2  -1  -2    5.26    0.20 
  -2  -1  -2    5.10    0.19 
  -2  -1  -2    5.13    0.15 
  -2  -1  -2    5.29    0.21 
   2   1   2    4.93    0.21 
  -3  -1  -2    2.33    0.11 
  -3  -1  -2    2.51    0.16 
  -3  -1  -2    2.69    0.17 
   3   1   2    2.16    0.19 
   3   1   2    2.40    0.16 
  -4  -1  -2    1.34    0.10 
  -4  -1  -2    1.63    0.14 
  -4  -1  -2    1.54    0.15 
   4   1   2    1.33    0.16 
   4   1   2    1.66    0.18 
  -5  -1  -2    0.67    0.12 
  -5  -1  -2    0.73    0.13 
  -5  -1  -2    0.54    0.08 
   5   1   2    0.55    0.16 
   5   1   2    0.53    0.14 
  -6  -1  -2    0.24    0.07 
  -6  -1  -2    0.15    0.10 
  -6  -1  -2    0.24    0.12 
   6   1   2    0.37    0.18 
   6   1   2    0.38    0.15 
  -7  -1  -2    0.25    0.12 
  -7  -1  -2    0.50    0.15 
   7   1   2    0.39    0.19 
   7   1   2    0.54    0.18 
  -8  -1  -2    0.08    0.12 
  -8  -1  -2    0.11    0.11 
   8   1   2   -0.11    0.19 
   8   1   2    0.03    0.16 
  -9  -1  -2    1.36    0.24 
  -9  -1  -2    1.82    0.27 
   9   1   2    1.56    0.31 
   9   1   2    2.13    0.37 
 -10  -1  -2    0.20    0.15 
 -10  -1  -2    0.39    0.17 
  10   1   2    0.69    0.27 
  10   1   2    0.40    0.28 
  10  -2  -2    0.55    0.30 
 -10   2   2    0.13    0.19 
 -10   2   2    0.50    0.17 
   9  -2  -2   -0.34    0.15 
   9  -2  -2    0.01    0.26 
  -9   2   2    0.13    0.12 
  -9   2   2   -0.06    0.12 
   8  -2  -2   -0.02    0.21 
   8  -2  -2   -0.12    0.14 
  -8   2   2    0.06    0.10 
  -8   2   2    0.00    0.11 
  -8   2   2   -0.15    0.09 
   7  -2  -2   12.25    0.59 
   7  -2  -2   11.19    0.48 
  -7   2   2   12.07    0.48 
  -7   2   2   11.23    0.43 
  -7   2   2   12.18    0.50 
   6  -2  -2    4.84    0.37 
   6  -2  -2    4.73    0.28 
  -6   2   2    4.50    0.27 
  -6   2   2    4.01    0.26 
  -6   2   2    4.00    0.23 
   5  -2  -2    0.01    0.12 
   5  -2  -2   -0.17    0.08 
  -5   2   2    0.00    0.07 
  -5   2   2    0.10    0.07 
  -5   2   2    0.01    0.07 
   4  -2  -2    6.07    0.32 
   4  -2  -2    6.61    0.25 
  -4   2   2    6.94    0.28 
  -4   2   2    6.24    0.26 
  -4   2   2    6.49    0.25 
   3  -2  -2    4.88    0.25 
   3  -2  -2    4.52    0.18 
  -3   2   2    4.82    0.20 
  -3   2   2    4.42    0.19 
  -3   2   2    4.62    0.20 
   2  -2  -2    3.58    0.20 
   2  -2  -2    4.25    0.18 
   2  -2  -2    4.09    0.14 
  -2   2   2    4.02    0.17 
  -2   2   2    3.81    0.15 
   1  -2  -2   14.52    0.35 
   1  -2  -2   14.34    0.38 
   1  -2  -2   13.51    0.31 
   1  -2  -2   14.30    0.37 
  -1   2   2   14.68    0.36 
   0  -2  -2   50.57    1.01 
   0  -2  -2   44.64    0.99 
   0  -2  -2   47.17    0.99 
   0   2   2   45.87    0.97 
   0   2   2   46.77    0.97 
  -1  -2  -2    2.76    0.14 
  -1  -2  -2    2.63    0.13 
  -1  -2  -2    2.93    0.15 
   1   2   2    2.77    0.10 
   1   2   2    2.94    0.14 
  -2  -2  -2    0.57    0.09 
  -2  -2  -2    0.45    0.08 
  -2  -2  -2    0.53    0.05 
  -2  -2  -2    0.40    0.08 
   2   2   2    0.47    0.10 
  -3  -2  -2   21.97    0.47 
  -3  -2  -2   21.04    0.59 
  -3  -2  -2   22.35    0.59 
  -3  -2  -2   20.84    0.57 
   3   2   2   21.76    0.59 
  -4  -2  -2    5.86    0.28 
  -4  -2  -2    6.15    0.18 
  -4  -2  -2    5.53    0.27 
   4   2   2    6.04    0.29 
   4   2   2    5.60    0.30 
  -5  -2  -2    0.04    0.08 
  -5  -2  -2    0.13    0.09 
  -5  -2  -2   -0.01    0.05 
   5   2   2   -0.13    0.13 
   5   2   2   -0.04    0.09 
  -6  -2  -2    4.56    0.30 
  -6  -2  -2    4.84    0.30 
   6   2   2    5.29    0.37 
   6   2   2    4.86    0.32 
  -7  -2  -2    0.00    0.09 
  -7  -2  -2    0.06    0.09 
   7   2   2    0.13    0.16 
   7   2   2   -0.09    0.12 
  -8  -2  -2    0.02    0.10 
  -8  -2  -2    0.11    0.13 
   8   2   2   -0.02    0.21 
   8   2   2    0.13    0.16 
  -9  -2  -2    0.13    0.14 
  -9  -2  -2    0.48    0.17 
   9   2   2    0.68    0.24 
   9   2   2    0.13    0.24 
 -10  -2  -2    1.49    0.27 
 -10  -2  -2    1.02    0.25 
  10   2   2    0.62    0.31 
  10   2   2    1.64    0.33 
  10  -3  -2    0.26    0.30 
 -10   3   2    0.29    0.15 
   9  -3  -2    0.11    0.23 
   9  -3  -2    0.20    0.14 
  -9   3   2   -0.10    0.10 
  -9   3   2    0.17    0.12 
   8  -3  -2    0.40    0.22 
   8  -3  -2    0.54    0.18 
   8  -3  -2    1.09    0.19 
  -8   3   2    0.64    0.16 
  -8   3   2    1.25    0.20 
   7  -3  -2    1.97    0.32 
   7  -3  -2    2.45    0.24 
  -7   3   2    2.07    0.22 
  -7   3   2    1.90    0.21 
  -7   3   2    1.99    0.23 
   6  -3  -2    2.60    0.30 
   6  -3  -2    2.43    0.23 
  -6   3   2    2.45    0.21 
  -6   3   2    2.53    0.20 
  -6   3   2    2.53    0.21 
   5  -3  -2    2.01    0.18 
   5  -3  -2    2.20    0.25 
   5  -3  -2    1.83    0.18 
  -5   3   2    2.46    0.20 
  -5   3   2    2.24    0.18 
   4  -3  -2    1.47    0.15 
   4  -3  -2    1.53    0.19 
   4  -3  -2    1.59    0.14 
  -4   3   2    1.53    0.13 
  -4   3   2    1.32    0.14 
   3  -3  -2    2.28    0.16 
   3  -3  -2    2.36    0.13 
   3  -3  -2    2.42    0.21 
  -3   3   2    2.32    0.15 
  -3   3   2    2.10    0.13 
   2  -3  -2    3.40    0.21 
   2  -3  -2    3.03    0.12 
   2  -3  -2    3.22    0.18 
  -2   3   2    2.94    0.14 
  -2   3   2    3.12    0.16 
   1  -3  -2  110.28    2.27 
   1  -3  -2  113.03    2.26 
   1  -3  -2  110.06    2.22 
   1  -3  -2  108.48    2.19 
  -1   3   2  111.39    2.23 
   0  -3  -2   57.53    1.24 
   0  -3  -2   56.85    1.25 
   0  -3  -2   57.00    1.22 
   0   3   2   58.59    1.20 
   0   3   2   61.60    1.22 
  -1  -3  -2    9.10    0.30 
  -1  -3  -2   10.15    0.30 
  -1  -3  -2    9.62    0.31 
   1   3   2    9.84    0.24 
   1   3   2    9.89    0.30 
  -2  -3  -2    0.05    0.07 
  -2  -3  -2    0.02    0.05 
  -2  -3  -2    0.14    0.07 
   2   3   2    0.01    0.02 
   2   3   2    0.03    0.07 
  -3  -3  -2    0.02    0.06 
  -3  -3  -2    0.05    0.08 
  -3  -3  -2    0.11    0.08 
  -3  -3  -2    0.04    0.02 
   3   3   2    0.10    0.09 
  -4  -3  -2    0.57    0.12 
  -4  -3  -2    0.36    0.11 
  -4  -3  -2    0.37    0.11 
   4   3   2    0.39    0.13 
  -5  -3  -2   -0.01    0.09 
  -5  -3  -2   -0.02    0.08 
   5   3   2   -0.13    0.14 
   5   3   2    0.07    0.10 
  -6  -3  -2    0.16    0.11 
  -6  -3  -2    0.47    0.14 
   6   3   2    0.53    0.18 
   6   3   2    0.30    0.14 
  -7  -3  -2    0.07    0.11 
  -7  -3  -2   -0.08    0.11 
   7   3   2    0.09    0.13 
   7   3   2   -0.35    0.14 
  -8  -3  -2    0.07    0.13 
  -8  -3  -2    0.22    0.13 
   8   3   2   -0.05    0.20 
   8   3   2    0.39    0.17 
  -9  -3  -2    0.00    0.13 
  -9  -3  -2    0.02    0.15 
   9   3   2   -0.21    0.21 
   9   3   2    0.43    0.21 
 -10  -3  -2    0.15    0.16 
  10   3   2   -0.17    0.42 
  10  -4  -2    0.52    0.32 
 -10   4   2    0.49    0.15 
   9  -4  -2    0.16    0.11 
   9  -4  -2   -0.13    0.25 
  -9   4   2   -0.08    0.10 
  -9   4   2    0.03    0.13 
   8  -4  -2    1.30    0.20 
   8  -4  -2    1.29    0.32 
   8  -4  -2    1.10    0.20 
  -8   4   2    1.26    0.20 
  -8   4   2    1.09    0.19 
   7  -4  -2    0.87    0.16 
   7  -4  -2    0.77    0.15 
   7  -4  -2    0.83    0.26 
  -7   4   2    0.77    0.15 
  -7   4   2    0.85    0.15 
   6  -4  -2    0.04    0.10 
   6  -4  -2    0.15    0.19 
   6  -4  -2    0.03    0.09 
  -6   4   2    0.07    0.08 
  -6   4   2   -0.03    0.09 
   5  -4  -2    4.18    0.25 
   5  -4  -2    3.93    0.22 
   5  -4  -2    3.78    0.34 
  -5   4   2    4.00    0.25 
  -5   4   2    4.01    0.22 
   4  -4  -2    8.25    0.38 
   4  -4  -2    8.55    0.28 
   4  -4  -2    8.29    0.32 
  -4   4   2    8.23    0.29 
  -4   4   2    8.53    0.34 
   3  -4  -2    0.00    0.04 
   3  -4  -2   -0.06    0.08 
   3  -4  -2    0.01    0.11 
  -3   4   2   -0.04    0.06 
  -3   4   2    0.00    0.05 
   2  -4  -2   -0.11    0.09 
   2  -4  -2    0.00    0.12 
   2  -4  -2   -0.06    0.05 
   2  -4  -2    0.00    0.04 
  -2   4   2    0.01    0.07 
   1  -4  -2   13.30    0.40 
   1  -4  -2   12.51    0.40 
   1  -4  -2   12.48    0.33 
   1  -4  -2   12.88    0.35 
  -1   4   2   12.67    0.36 
   0  -4  -2    1.37    0.13 
   0  -4  -2    1.40    0.13 
   0  -4  -2    1.64    0.15 
   0   4   2    1.43    0.10 
   0   4   2    1.52    0.11 
  -1  -4  -2    1.40    0.13 
  -1  -4  -2    1.20    0.13 
  -1  -4  -2    1.56    0.13 
   1   4   2    1.20    0.08 
   1   4   2    1.04    0.11 
  -2  -4  -2    1.05    0.13 
  -2  -4  -2    1.14    0.13 
  -2  -4  -2    1.49    0.15 
   2   4   2    1.18    0.06 
   2   4   2    1.05    0.14 
  -3  -4  -2    0.49    0.11 
  -3  -4  -2    0.51    0.11 
  -3  -4  -2    0.61    0.12 
   3   4   2    0.56    0.13 
  -4  -4  -2    3.01    0.23 
  -4  -4  -2    2.30    0.20 
  -4  -4  -2    2.48    0.20 
   4   4   2    2.49    0.23 
  -5  -4  -2    7.89    0.39 
  -5  -4  -2    8.51    0.40 
   5   4   2    8.82    0.44 
   5   4   2    7.73    0.39 
  -6  -4  -2    0.00    0.10 
  -6  -4  -2    0.30    0.13 
   6   4   2    0.21    0.12 
   6   4   2    0.21    0.16 
  -7  -4  -2    0.13    0.12 
  -7  -4  -2    0.09    0.13 
   7   4   2    0.19    0.20 
   7   4   2    0.03    0.12 
  -8  -4  -2    0.68    0.19 
  -8  -4  -2    0.76    0.21 
   8   4   2    0.85    0.23 
   8   4   2    0.88    0.27 
  -9  -4  -2    4.08    0.40 
  -9  -4  -2    4.33    0.40 
   9   4   2    5.63    0.46 
   9   4   2    4.71    0.51 
  10  -5  -2    0.19    0.29 
 -10   5   2    0.07    0.16 
   9  -5  -2   -0.19    0.22 
   9  -5  -2    0.38    0.15 
  -9   5   2    0.12    0.11 
  -9   5   2   -0.07    0.12 
   8  -5  -2    2.37    0.39 
   8  -5  -2    2.66    0.26 
  -8   5   2    2.00    0.25 
  -8   5   2    2.26    0.24 
   7  -5  -2    1.11    0.18 
   7  -5  -2    0.62    0.14 
   7  -5  -2    0.75    0.24 
  -7   5   2    0.71    0.16 
  -7   5   2    0.57    0.13 
   6  -5  -2    3.67    0.35 
   6  -5  -2    2.90    0.24 
   6  -5  -2    3.33    0.22 
  -6   5   2    3.41    0.22 
  -6   5   2    3.65    0.27 
   5  -5  -2    4.94    0.23 
   5  -5  -2    4.86    0.36 
   5  -5  -2    4.98    0.28 
  -5   5   2    4.62    0.24 
  -5   5   2    4.38    0.28 
   4  -5  -2    0.98    0.11 
   4  -5  -2    1.36    0.23 
   4  -5  -2    0.63    0.13 
  -4   5   2    0.80    0.10 
  -4   5   2    0.63    0.12 
   3  -5  -2    9.45    0.35 
   3  -5  -2    8.98    0.30 
   3  -5  -2    9.03    0.28 
   3  -5  -2    8.57    0.39 
  -3   5   2    8.93    0.33 
   2  -5  -2   78.23    1.64 
   2  -5  -2   81.66    1.71 
   2  -5  -2   77.04    1.75 
   2  -5  -2   78.23    1.63 
  -2   5   2   78.20    1.68 
   1  -5  -2    2.46    0.19 
   1  -5  -2    2.84    0.21 
   1  -5  -2    2.65    0.16 
   1  -5  -2    2.72    0.14 
  -1   5   2    2.82    0.16 
   0  -5  -2    0.13    0.10 
   0  -5  -2    0.17    0.07 
   0  -5  -2    0.12    0.07 
   0   5   2    0.18    0.06 
   0   5   2    0.17    0.07 
  -1  -5  -2    2.46    0.17 
  -1  -5  -2    2.80    0.20 
  -1  -5  -2    2.38    0.18 
   1   5   2    2.57    0.12 
   1   5   2    2.59    0.18 
  -2  -5  -2   33.64    0.87 
  -2  -5  -2   34.34    0.83 
  -2  -5  -2   33.44    0.87 
   2   5   2   33.66    0.70 
   2   5   2   33.89    0.86 
  -3  -5  -2    1.03    0.15 
  -3  -5  -2    0.86    0.14 
  -3  -5  -2    1.07    0.15 
   3   5   2    0.84    0.14 
  -4  -5  -2    3.26    0.25 
  -4  -5  -2    3.44    0.25 
  -4  -5  -2    3.06    0.26 
   4   5   2    3.77    0.29 
  -5  -5  -2    7.58    0.39 
  -5  -5  -2    7.16    0.39 
  -5  -5  -2    6.98    0.38 
   5   5   2    7.86    0.43 
  -6  -5  -2    0.76    0.18 
  -6  -5  -2    0.91    0.18 
   6   5   2    0.73    0.20 
   6   5   2    0.98    0.20 
  -7  -5  -2    0.37    0.15 
  -7  -5  -2    0.63    0.18 
   7   5   2    0.95    0.22 
   7   5   2    0.41    0.22 
  -8  -5  -2    0.19    0.14 
  -8  -5  -2    0.32    0.17 
   8   5   2    0.36    0.17 
   8   5   2    0.15    0.25 
  -9  -5  -2    0.59    0.21 
  -9  -5  -2    0.36    0.19 
   9   5   2    0.95    0.23 
   9   5   2    0.07    0.26 
  10  -6  -2   -0.06    0.27 
 -10   6   2    0.05    0.16 
   9  -6  -2    0.89    0.32 
  -9   6   2    0.66    0.20 
   8  -6  -2   -0.23    0.20 
   8  -6  -2    0.12    0.11 
  -8   6   2    0.01    0.09 
  -8   6   2    0.05    0.14 
   7  -6  -2    2.05    0.24 
   7  -6  -2    1.73    0.32 
  -7   6   2    2.24    0.25 
  -7   6   2    1.79    0.20 
   6  -6  -2    4.80    0.42 
   6  -6  -2    4.59    0.25 
   6  -6  -2    4.73    0.30 
  -6   6   2    4.55    0.26 
  -6   6   2    4.90    0.32 
   5  -6  -2    1.35    0.24 
   5  -6  -2    1.30    0.18 
   5  -6  -2    1.28    0.14 
  -5   6   2    1.67    0.20 
  -5   6   2    1.62    0.15 
   4  -6  -2    3.44    0.32 
   4  -6  -2    3.56    0.19 
   4  -6  -2    3.61    0.25 
   4  -6  -2    3.52    0.18 
  -4   6   2    3.14    0.23 
   3  -6  -2    0.36    0.08 
   3  -6  -2    0.53    0.13 
   3  -6  -2    0.35    0.08 
   3  -6  -2    0.40    0.14 
  -3   6   2    0.19    0.09 
   2  -6  -2   70.58    1.56 
   2  -6  -2   69.70    1.48 
   2  -6  -2   69.57    1.62 
   2  -6  -2   69.61    1.48 
  -2   6   2   69.81    1.53 
   1  -6  -2    5.03    0.29 
   1  -6  -2    6.14    0.24 
   1  -6  -2    5.76    0.29 
   1  -6  -2    5.55    0.23 
  -1   6   2    5.68    0.24 
   0  -6  -2   11.72    0.42 
   0  -6  -2   11.69    0.37 
   0  -6  -2   11.72    0.43 
   0   6   2   11.57    0.34 
   0   6   2   12.48    0.38 
  -1  -6  -2   -0.09    0.09 
  -1  -6  -2   -0.02    0.07 
  -1  -6  -2   -0.06    0.07 
   1   6   2    0.06    0.04 
   1   6   2   -0.04    0.07 
  -2  -6  -2    0.03    0.09 
  -2  -6  -2    0.02    0.09 
  -2  -6  -2    0.10    0.09 
   2   6   2   -0.01    0.03 
   2   6   2    0.01    0.09 
  -3  -6  -2    0.29    0.11 
  -3  -6  -2    0.40    0.12 
  -3  -6  -2    0.28    0.11 
   3   6   2    0.24    0.11 
  -4  -6  -2    0.34    0.12 
  -4  -6  -2    0.59    0.15 
  -4  -6  -2    0.43    0.13 
   4   6   2    0.33    0.15 
  -5  -6  -2    0.11    0.11 
  -5  -6  -2    0.11    0.11 
  -5  -6  -2    0.03    0.11 
   5   6   2   -0.04    0.15 
  -6  -6  -2    2.48    0.27 
  -6  -6  -2    2.47    0.29 
   6   6   2    2.16    0.28 
   6   6   2    2.79    0.32 
  -7  -6  -2    0.19    0.14 
  -7  -6  -2    0.11    0.15 
   7   6   2    0.26    0.16 
   7   6   2    0.31    0.20 
  -8  -6  -2    0.00    0.13 
  -8  -6  -2    0.06    0.17 
   8   6   2    0.04    0.24 
   8   6   2    0.46    0.19 
  -9  -6  -2    0.08    0.15 
  10  -7  -2   -0.67    0.25 
 -10   7   2   -0.17    0.13 
   9  -7  -2    0.52    0.33 
  -9   7   2    0.44    0.19 
   8  -7  -2    0.00    0.25 
   8  -7  -2    0.00    0.16 
  -8   7   2   -0.02    0.14 
   7  -7  -2    2.16    0.24 
   7  -7  -2    1.49    0.31 
  -7   7   2    2.22    0.26 
  -7   7   2    2.25    0.21 
   6  -7  -2   -0.04    0.18 
   6  -7  -2    0.14    0.12 
  -6   7   2    0.07    0.13 
  -6   7   2   -0.06    0.07 
   5  -7  -2    1.13    0.24 
   5  -7  -2    0.48    0.10 
   5  -7  -2    0.70    0.11 
   5  -7  -2    0.86    0.17 
  -5   7   2    0.78    0.17 
   4  -7  -2    1.35    0.14 
   4  -7  -2    1.24    0.13 
   4  -7  -2    1.28    0.19 
   4  -7  -2    1.39    0.23 
  -4   7   2    1.66    0.19 
   3  -7  -2    4.11    0.20 
   3  -7  -2    4.02    0.20 
   3  -7  -2    4.01    0.28 
   3  -7  -2    3.72    0.29 
  -3   7   2    3.85    0.24 
   2  -7  -2    3.34    0.20 
   2  -7  -2    3.46    0.19 
   2  -7  -2    3.55    0.27 
   2  -7  -2    3.43    0.26 
  -2   7   2    3.03    0.20 
   1  -7  -2   13.87    0.42 
   1  -7  -2   13.85    0.52 
   1  -7  -2   13.93    0.48 
   1  -7  -2   14.05    0.42 
  -1   7   2   14.76    0.44 
   0  -7  -2    0.19    0.11 
   0  -7  -2    0.14    0.12 
   0  -7  -2    0.20    0.09 
   0   7   2    0.22    0.07 
   0   7   2    0.12    0.08 
  -1  -7  -2    2.33    0.19 
  -1  -7  -2    2.30    0.23 
  -1  -7  -2    2.07    0.20 
   1   7   2    2.18    0.13 
   1   7   2    2.06    0.20 
  -2  -7  -2   -0.04    0.08 
  -2  -7  -2    0.03    0.11 
  -2  -7  -2   -0.02    0.09 
   2   7   2   -0.06    0.09 
  -3  -7  -2    1.66    0.22 
  -3  -7  -2    1.92    0.21 
  -3  -7  -2    1.48    0.21 
   3   7   2    2.13    0.24 
  -4  -7  -2    1.96    0.25 
  -4  -7  -2    1.57    0.22 
  -4  -7  -2    1.58    0.20 
   4   7   2    2.13    0.27 
  -5  -7  -2    0.04    0.12 
  -5  -7  -2    0.04    0.13 
  -5  -7  -2    0.07    0.11 
   5   7   2    0.32    0.17 
  -6  -7  -2    0.15    0.15 
  -6  -7  -2    0.19    0.15 
   6   7   2    0.03    0.13 
   6   7   2    0.05    0.16 
  -7  -7  -2    0.32    0.18 
  -7  -7  -2    0.56    0.20 
   7   7   2    0.65    0.20 
   7   7   2    0.35    0.21 
  -8  -7  -2    1.66    0.29 
  -8  -7  -2    1.22    0.26 
   8   7   2    2.38    0.33 
   8   7   2    1.68    0.33 
 -10   8   2    0.27    0.19 
   9  -8  -2   -0.13    0.28 
  -9   8   2   -0.26    0.14 
   8  -8  -2    0.77    0.29 
  -8   8   2    1.58    0.26 
   7  -8  -2    0.72    0.28 
   7  -8  -2    0.89    0.20 
  -7   8   2    1.11    0.22 
   6  -8  -2    0.34    0.16 
   6  -8  -2    0.56    0.24 
  -6   8   2    0.46    0.17 
   5  -8  -2    1.36    0.15 
   5  -8  -2    1.58    0.22 
   5  -8  -2    1.62    0.29 
   5  -8  -2    1.76    0.16 
  -5   8   2    0.97    0.18 
   4  -8  -2    3.15    0.33 
   4  -8  -2    3.08    0.19 
   4  -8  -2    2.71    0.27 
   4  -8  -2    3.31    0.20 
  -4   8   2    3.05    0.26 
   3  -8  -2   36.87    0.97 
   3  -8  -2   36.28    0.86 
   3  -8  -2   35.15    0.87 
   3  -8  -2   34.59    1.04 
  -3   8   2   36.76    0.95 
   2  -8  -2    0.39    0.15 
   2  -8  -2    0.42    0.10 
   2  -8  -2    0.36    0.14 
   2  -8  -2    0.43    0.09 
  -2   8   2    0.19    0.09 
   1  -8  -2    1.31    0.15 
   1  -8  -2    1.26    0.19 
   1  -8  -2    1.58    0.21 
  -1   8   2    1.54    0.16 
  -1   8   2    1.73    0.16 
   0  -8  -2    4.69    0.31 
   0  -8  -2    4.81    0.24 
   0  -8  -2    4.36    0.31 
   0   8   2    4.36    0.21 
   0   8   2    4.96    0.27 
  -1  -8  -2    8.68    0.35 
  -1  -8  -2    9.38    0.43 
  -1  -8  -2    9.00    0.41 
   1   8   2    9.19    0.39 
   1   8   2    9.08    0.29 
  -2  -8  -2   -0.06    0.09 
  -2  -8  -2    0.16    0.11 
  -2  -8  -2    0.15    0.11 
   2   8   2    0.07    0.11 
  -3  -8  -2    0.68    0.18 
  -3  -8  -2    0.94    0.17 
  -3  -8  -2    0.86    0.18 
   3   8   2    0.71    0.16 
  -4  -8  -2    5.54    0.34 
  -4  -8  -2    5.71    0.37 
  -4  -8  -2    5.58    0.38 
   4   8   2    5.62    0.39 
  -5  -8  -2    0.24    0.15 
  -5  -8  -2    0.50    0.16 
  -5  -8  -2    0.20    0.13 
   5   8   2    0.74    0.21 
  -6  -8  -2    0.16    0.17 
  -6  -8  -2    0.20    0.16 
   6   8   2    0.59    0.23 
   6   8   2    0.31    0.17 
  -7  -8  -2    1.40    0.28 
  -7  -8  -2    1.26    0.24 
   7   8   2    1.69    0.29 
   7   8   2    1.62    0.32 
  -8  -8  -2    0.10    0.17 
  -8  -8  -2    0.52    0.20 
   8   8   2    0.04    0.27 
   9  -9  -2   -0.07    0.25 
  -9   9   2   -0.20    0.15 
   8  -9  -2   -0.13    0.22 
  -8   9   2   -0.12    0.13 
   7  -9  -2    1.92    0.35 
  -7   9   2    2.62    0.32 
   6  -9  -2    1.63    0.31 
   6  -9  -2    1.81    0.26 
  -6   9   2    1.56    0.23 
   5  -9  -2    1.13    0.21 
   5  -9  -2    0.87    0.23 
  -5   9   2    1.24    0.20 
   4  -9  -2    0.19    0.16 
   4  -9  -2   -0.07    0.13 
   4  -9  -2    0.02    0.07 
  -4   9   2   -0.02    0.10 
   3  -9  -2   24.44    0.67 
   3  -9  -2   24.94    0.65 
   3  -9  -2   23.79    0.83 
   3  -9  -2   25.33    0.76 
  -3   9   2   25.11    0.74 
   2  -9  -2    4.67    0.31 
   2  -9  -2    4.13    0.24 
   2  -9  -2    3.95    0.31 
   2  -9  -2    3.96    0.23 
  -2   9   2    3.99    0.26 
   1  -9  -2    0.05    0.10 
   1  -9  -2    0.16    0.13 
   1  -9  -2    0.22    0.13 
  -1   9   2    0.20    0.10 
  -1   9   2    0.16    0.09 
   0  -9  -2    0.13    0.14 
   0  -9  -2   -0.12    0.08 
   0  -9  -2    0.06    0.12 
   0   9   2    0.04    0.07 
   0   9   2   -0.01    0.08 
  -1  -9  -2   -0.16    0.11 
  -1  -9  -2    0.05    0.10 
  -1  -9  -2    0.16    0.10 
   1   9   2    0.04    0.10 
  -2  -9  -2    0.20    0.13 
  -2  -9  -2    0.17    0.12 
  -2  -9  -2    0.21    0.14 
   2   9   2    0.06    0.12 
  -3  -9  -2   -0.10    0.10 
  -3  -9  -2    0.11    0.14 
  -3  -9  -2    0.11    0.11 
   3   9   2    0.20    0.14 
  -4  -9  -2    0.10    0.12 
  -4  -9  -2    0.00    0.13 
  -4  -9  -2    0.09    0.11 
   4   9   2    0.08    0.15 
  -5  -9  -2    1.15    0.22 
  -5  -9  -2    0.75    0.19 
  -5  -9  -2    1.03    0.23 
   5   9   2    1.44    0.27 
  -6  -9  -2   -0.07    0.14 
  -6  -9  -2   -0.02    0.11 
  -6  -9  -2   -0.11    0.14 
   6   9   2    0.07    0.20 
  -7  -9  -2    0.84    0.24 
  -7  -9  -2    0.70    0.21 
   7   9   2    1.24    0.31 
   7   9   2    1.35    0.24 
   9 -10  -2    0.35    0.33 
  -9  10   2    0.74    0.23 
   8 -10  -2    0.26    0.28 
  -8  10   2    0.10    0.16 
   7 -10  -2   -0.43    0.20 
  -7  10   2   -0.20    0.12 
   6 -10  -2    0.52    0.21 
   6 -10  -2    0.26    0.23 
  -6  10   2    0.55    0.19 
   5 -10  -2    1.23    0.27 
   5 -10  -2    1.56    0.25 
  -5  10   2    1.47    0.23 
   4 -10  -2    0.77    0.22 
   4 -10  -2    0.49    0.18 
  -4  10   2    0.86    0.17 
   3 -10  -2    2.70    0.20 
   3 -10  -2    2.63    0.28 
   3 -10  -2    2.51    0.33 
  -3  10   2    2.68    0.25 
   2 -10  -2    2.42    0.30 
   2 -10  -2    2.76    0.28 
  -2  10   2    2.97    0.24 
   1 -10  -2    0.22    0.14 
   1 -10  -2    0.01    0.09 
   1 -10  -2    0.03    0.13 
  -1  10   2    0.16    0.09 
  -1  10   2    0.17    0.10 
   0 -10  -2    0.12    0.10 
   0 -10  -2    0.18    0.13 
   0 -10  -2    0.23    0.15 
   0  10   2    0.16    0.11 
   0  10   2    0.03    0.07 
  -1 -10  -2   -0.09    0.10 
  -1 -10  -2    0.01    0.11 
  -1 -10  -2   -0.04    0.10 
   1  10   2    0.16    0.12 
  -2 -10  -2    3.60    0.32 
  -2 -10  -2    4.15    0.33 
  -2 -10  -2    4.15    0.29 
   2  10   2    4.04    0.32 
  -3 -10  -2    0.74    0.17 
  -3 -10  -2    0.57    0.17 
  -3 -10  -2    0.73    0.20 
   3  10   2    0.74    0.19 
  -4 -10  -2    0.09    0.12 
  -4 -10  -2   -0.16    0.10 
  -4 -10  -2   -0.10    0.11 
   4  10   2    0.22    0.17 
  -5 -10  -2    0.12    0.17 
  -5 -10  -2    0.23    0.15 
  -5 -10  -2    0.42    0.17 
   5  10   2    0.14    0.19 
  -6 -10  -2    0.25    0.19 
  -6 -10  -2    0.61    0.22 
  -6 -10  -2    0.55    0.19 
   6  10   2    0.62    0.25 
   8 -11  -2    0.09    0.23 
  -8  11   2    0.04    0.19 
   7 -11  -2    0.84    0.30 
  -7  11   2    0.74    0.21 
   6 -11  -2    0.01    0.19 
  -6  11   2    0.07    0.16 
   5 -11  -2    1.78    0.34 
   5 -11  -2    1.28    0.24 
  -5  11   2    0.97    0.21 
   4 -11  -2   12.66    0.56 
   4 -11  -2   12.18    0.64 
  -4  11   2   14.37    0.58 
   3 -11  -2    0.01    0.14 
   3 -11  -2   -0.02    0.13 
  -3  11   2    0.01    0.11 
   2 -11  -2    0.03    0.15 
   2 -11  -2    0.18    0.15 
  -2  11   2    0.28    0.11 
  -2  11   2    0.42    0.12 
   1 -11  -2    4.17    0.34 
   1 -11  -2    4.09    0.36 
  -1  11   2    3.89    0.28 
  -1  11   2    3.75    0.25 
   0 -11  -2    4.42    0.37 
   0 -11  -2    4.21    0.31 
   0 -11  -2    3.71    0.33 
   0  11   2    4.17    0.30 
  -1 -11  -2   -0.04    0.14 
  -1 -11  -2   -0.02    0.11 
  -1 -11  -2   -0.10    0.11 
   1  11   2    0.04    0.11 
  -2 -11  -2   -0.11    0.09 
  -2 -11  -2   -0.24    0.10 
  -2 -11  -2   -0.05    0.15 
   2  11   2    0.14    0.13 
  -3 -11  -2    2.29    0.32 
  -3 -11  -2    2.25    0.26 
  -3 -11  -2    2.03    0.30 
   3  11   2    2.84    0.33 
  -4 -11  -2    0.60    0.19 
  -4 -11  -2    0.29    0.16 
  -4 -11  -2    0.31    0.16 
   4  11   2    0.59    0.20 
  -5 -11  -2   -0.15    0.10 
  -5 -11  -2    0.09    0.18 
  -5 -11  -2   -0.01    0.14 
   5  11   2    0.04    0.18 
  -6 -11  -2    0.61    0.23 
  -6 -11  -2    0.87    0.25 
  -6 -11  -2    1.34    0.26 
   6  11   2    0.65    0.26 
   8 -12  -2    0.07    0.27 
  -8  12   2    0.60    0.23 
   7 -12  -2   -0.33    0.21 
  -7  12   2   -0.17    0.15 
   6 -12  -2   -0.11    0.21 
  -6  12   2    0.06    0.16 
   5 -12  -2    0.34    0.23 
  -5  12   2    0.12    0.15 
   4 -12  -2    5.76    0.42 
   4 -12  -2    5.70    0.46 
  -4  12   2    5.30    0.38 
   3 -12  -2    0.00    0.15 
   3 -12  -2   -0.14    0.15 
  -3  12   2    0.02    0.12 
   2 -12  -2    0.14    0.16 
   2 -12  -2    0.12    0.15 
  -2  12   2    0.15    0.19 
  -2  12   2   -0.02    0.10 
   1 -12  -2    0.24    0.16 
   1 -12  -2    0.14    0.16 
  -1  12   2    0.24    0.11 
  -1  12   2    0.52    0.14 
   0 -12  -2    0.14    0.15 
   0 -12  -2   -0.05    0.11 
   0  12   2    0.23    0.13 
  -1 -12  -2    0.54    0.19 
  -1 -12  -2    0.71    0.21 
   1  12   2    0.72    0.17 
  -2 -12  -2    0.17    0.15 
  -2 -12  -2    0.03    0.16 
   2  12   2    0.13    0.14 
  -3 -12  -2   -0.02    0.16 
  -3 -12  -2   -0.13    0.11 
  -3 -12  -2    0.24    0.15 
   3  12   2    0.25    0.17 
  -4 -12  -2    0.40    0.17 
  -4 -12  -2    0.47    0.18 
  -4 -12  -2    0.70    0.23 
  -5 -12  -2    0.28    0.18 
  -5 -12  -2    0.16    0.15 
  -5 -12  -2    0.49    0.23 
   5  12   2    0.61    0.22 
   7 -13  -2   -0.14    0.24 
  -7  13   2   -0.05    0.17 
   6 -13  -2    0.73    0.27 
  -6  13   2    0.44    0.18 
   5 -13  -2    0.09    0.20 
  -5  13   2    0.40    0.18 
   4 -13  -2    0.96    0.25 
   4 -13  -2    1.29    0.30 
  -4  13   2    1.06    0.22 
   3 -13  -2    0.03    0.18 
   3 -13  -2    0.20    0.17 
  -3  13   2    0.48    0.16 
   2 -13  -2    0.33    0.19 
   2 -13  -2    0.52    0.20 
  -2  13   2    0.57    0.15 
   1 -13  -2    1.21    0.26 
   1 -13  -2    1.09    0.24 
   0 -13  -2    0.04    0.13 
   0 -13  -2   -0.04    0.15 
   0  13   2    0.22    0.13 
  -1 -13  -2    1.43    0.27 
  -1 -13  -2    1.82    0.31 
   1  13   2    1.12    0.21 
  -2 -13  -2    0.76    0.24 
  -2 -13  -2    0.56    0.19 
   2  13   2    0.98    0.22 
  -3 -13  -2    0.14    0.15 
  -3 -13  -2    0.01    0.17 
   3  13   2    0.33    0.16 
  -4 -13  -2    0.16    0.20 
  -4 -13  -2    0.02    0.13 
   4  13   2    0.25    0.18 
   6 -14  -2    0.84    0.31 
  -6  14   2    0.85    0.25 
   5 -14  -2    3.67    0.48 
  -5  14   2    3.21    0.36 
   4 -14  -2    0.16    0.20 
  -4  14   2    0.38    0.17 
   3 -14  -2   -0.13    0.16 
   3 -14  -2    0.11    0.18 
  -3  14   2   -0.01    0.12 
   2 -14  -2    0.14    0.18 
   2 -14  -2    0.21    0.19 
   1 -14  -2    0.26    0.20 
   1 -14  -2    0.52    0.21 
   0 -14  -2    0.71    0.23 
   0 -14  -2    0.63    0.23 
  -1 -14  -2    0.38    0.22 
  -1 -14  -2    0.59    0.21 
   1  14   2    1.03    0.20 
  -2 -14  -2    0.37    0.19 
  -2 -14  -2    0.61    0.22 
   2  14   2    0.79    0.21 
  -3 -14  -2   -0.09    0.15 
  -3 -14  -2    0.03    0.14 
   4 -15  -2    0.15    0.20 
  -4  15   2   -0.02    0.13 
   3 -15  -2    0.02    0.17 
   2 -15  -2    0.18    0.19 
   2 -15  -2    0.09    0.18 
   1 -15  -2   -0.12    0.17 
   1 -15  -2    0.07    0.18 
   0 -15  -2   -0.20    0.15 
   0 -15  -2   -0.05    0.15 
  -1 -15  -2   -0.09    0.17 
  -1 -15  -2   -0.04    0.16 
   1  16  -3    0.59    0.19 
  -1 -16   3    0.29    0.20 
   0  16  -3    0.12    0.14 
   0 -16   3   -0.19    0.16 
  -1  16  -3    0.32    0.16 
   1 -16   3   -0.18    0.16 
  -2  16  -3    0.29    0.20 
   2 -16   3   -0.11    0.18 
   3 -16   3    0.02    0.19 
  -4  16  -3    0.23    0.19 
   4 -16   3    0.07    0.20 
   3  15  -3    0.55    0.20 
  -3 -15   3    0.15    0.19 
  -3 -15   3    0.28    0.19 
   2  15  -3    0.39    0.17 
  -2 -15   3    0.17    0.18 
  -2 -15   3    0.26    0.20 
   1  15  -3    0.16    0.16 
  -1 -15   3   -0.02    0.14 
  -1 -15   3   -0.02    0.15 
   0  15  -3    0.25    0.14 
   0 -15   3    0.08    0.16 
   0 -15   3    0.14    0.18 
  -1  15  -3    0.64    0.19 
   1 -15   3    0.52    0.22 
  -2  15  -3    0.18    0.13 
   2 -15   3    0.10    0.19 
  -3  15  -3   -0.11    0.12 
   3 -15   3    0.08    0.14 
   3 -15   3   -0.07    0.16 
  -4  15  -3    0.92    0.23 
   4 -15   3    0.63    0.25 
  -5  15  -3   -0.04    0.17 
   5 -15   3   -0.10    0.16 
  -6  15  -3    0.05    0.16 
   6 -15   3    0.06    0.22 
   4  14  -3    0.43    0.19 
  -4 -14   3    0.21    0.19 
  -4 -14   3    0.49    0.21 
   3  14  -3    0.34    0.17 
  -3 -14   3    0.15    0.17 
  -3 -14   3    0.34    0.19 
   2  14  -3    2.67    0.33 
  -2 -14   3    2.16    0.35 
  -2 -14   3    2.49    0.32 
   1  14  -3    0.44    0.18 
  -1 -14   3    0.08    0.14 
  -1 -14   3    0.07    0.14 
   0  14  -3    0.61    0.19 
   0 -14   3    0.29    0.17 
   0 -14   3    0.28    0.16 
  -1  14  -3    0.94    0.21 
   1 -14   3    0.66    0.22 
   1 -14   3    0.69    0.19 
  -2  14  -3    0.84    0.19 
   2 -14   3    0.77    0.24 
   2 -14   3    1.25    0.23 
  -3  14  -3   -0.07    0.13 
   3 -14   3    0.10    0.12 
   3 -14   3    0.04    0.16 
  -4  14  -3    0.07    0.16 
   4 -14   3    0.12    0.18 
   4 -14   3    0.07    0.11 
  -5  14  -3   -0.16    0.15 
   5 -14   3    0.07    0.20 
  -6  14  -3   -0.32    0.14 
   6 -14   3   -0.29    0.21 
  -7  14  -3    0.45    0.22 
   7 -14   3   -0.03    0.21 
   5  13  -3    0.38    0.21 
  -5 -13   3    0.02    0.16 
  -5 -13   3    0.04    0.17 
   4  13  -3    1.26    0.27 
  -4 -13   3    1.16    0.26 
  -4 -13   3    1.52    0.31 
   3  13  -3    0.49    0.18 
  -3 -13   3    0.22    0.16 
  -3 -13   3    0.51    0.19 
   2  13  -3    0.61    0.20 
  -2 -13   3    0.59    0.19 
  -2 -13   3    0.58    0.21 
   1  13  -3    0.29    0.16 
  -1 -13   3    0.26    0.15 
  -1 -13   3    0.39    0.19 
   0  13  -3    0.07    0.13 
   0 -13   3    0.04    0.13 
   0 -13   3    0.25    0.18 
  -1  13  -3    5.80    0.35 
   1 -13   3    5.95    0.46 
   1 -13   3    5.34    0.36 
   1 -13   3    5.60    0.36 
  -2  13  -3   -0.07    0.11 
   2 -13   3    0.06    0.12 
   2 -13   3    0.04    0.14 
  -3  13  -3    1.09    0.21 
   3 -13   3    0.73    0.23 
   3 -13   3    1.14    0.19 
  -4  13  -3    0.12    0.16 
   4 -13   3    0.19    0.19 
   4 -13   3    0.23    0.13 
  -5  13  -3   -0.15    0.14 
   5 -13   3    0.12    0.13 
   5 -13   3   -0.08    0.20 
  -6  13  -3    1.03    0.24 
   6 -13   3    0.48    0.26 
  -7  13  -3   -0.34    0.15 
   7 -13   3   -0.01    0.21 
  -8  13  -3    0.11    0.22 
   8 -13   3    0.15    0.31 
   6  12  -3    2.65    0.37 
  -6 -12   3    2.59    0.37 
  -6 -12   3    1.77    0.32 
  -6 -12   3    2.42    0.30 
   5  12  -3    0.13    0.18 
  -5 -12   3    0.01    0.13 
  -5 -12   3   -0.10    0.12 
  -5 -12   3   -0.04    0.15 
   4  12  -3    0.15    0.16 
  -4 -12   3    0.62    0.21 
  -4 -12   3    0.26    0.17 
   3  12  -3    1.04    0.23 
  -3 -12   3    0.68    0.21 
  -3 -12   3    1.01    0.22 
   2  12  -3    0.14    0.15 
  -2 -12   3    0.09    0.13 
  -2 -12   3    0.21    0.15 
   1  12  -3   -0.01    0.12 
  -1 -12   3   -0.03    0.11 
  -1 -12   3   -0.03    0.11 
   0  12  -3    0.35    0.14 
   0 -12   3    0.54    0.16 
   0 -12   3    0.34    0.16 
  -1  12  -3    0.06    0.10 
   1 -12   3   -0.06    0.12 
   1 -12   3    0.36    0.14 
   1 -12   3    0.14    0.11 
  -2  12  -3    1.39    0.20 
   2 -12   3    1.37    0.26 
   2 -12   3    1.26    0.18 
   2 -12   3    1.42    0.21 
  -3  12  -3    0.90    0.18 
   3 -12   3    0.32    0.18 
   3 -12   3    0.90    0.17 
  -4  12  -3    1.49    0.22 
   4 -12   3    2.07    0.25 
   4 -12   3    1.79    0.30 
  -5  12  -3   -0.08    0.13 
   5 -12   3   -0.10    0.09 
   5 -12   3   -0.13    0.18 
  -6  12  -3    0.29    0.18 
   6 -12   3   -0.18    0.20 
  -7  12  -3    0.39    0.18 
   7 -12   3   -0.08    0.20 
  -8  12  -3    0.29    0.20 
   8 -12   3    0.18    0.28 
   7  11  -3    0.40    0.18 
  -7 -11   3    0.16    0.15 
   6  11  -3    1.06    0.27 
  -6 -11   3    0.82    0.21 
  -6 -11   3    0.43    0.21 
  -6 -11   3    0.99    0.26 
   5  11  -3    0.70    0.22 
  -5 -11   3    0.44    0.18 
  -5 -11   3    0.31    0.16 
  -5 -11   3    0.30    0.15 
   4  11  -3    0.83    0.22 
  -4 -11   3    0.63    0.16 
  -4 -11   3    0.97    0.22 
  -4 -11   3    1.05    0.22 
   3  11  -3   10.02    0.52 
  -3 -11   3   11.13    0.53 
  -3 -11   3   10.47    0.57 
  -3 -11   3   10.82    0.45 
   2  11  -3    0.27    0.15 
  -2 -11   3    0.35    0.11 
  -2 -11   3    0.23    0.13 
  -2 -11   3    0.39    0.15 
   1  11  -3    0.72    0.18 
  -1 -11   3    0.74    0.19 
  -1 -11   3    0.57    0.15 
   0  11  -3   -0.17    0.07 
   0 -11   3    0.09    0.11 
   0 -11   3    0.11    0.11 
   0 -11   3   -0.06    0.10 
  -1  11  -3    0.84    0.15 
   1 -11   3    1.19    0.18 
   1 -11   3    1.49    0.26 
   1 -11   3    1.30    0.19 
  -2  11  -3    0.34    0.13 
   2 -11   3    0.59    0.13 
   2 -11   3    0.29    0.13 
   2 -11   3    0.57    0.18 
  -3  11  -3   -0.17    0.09 
   3 -11   3   -0.12    0.09 
   3 -11   3   -0.04    0.08 
   3 -11   3   -0.03    0.14 
  -4  11  -3    0.04    0.12 
   4 -11   3    0.07    0.14 
   4 -11   3   -0.02    0.09 
  -5  11  -3    0.48    0.19 
   5 -11   3    0.91    0.26 
   5 -11   3    1.10    0.19 
  -6  11  -3    0.37    0.17 
   6 -11   3    0.24    0.13 
   6 -11   3    0.41    0.22 
  -7  11  -3    0.55    0.21 
   7 -11   3    0.21    0.25 
  -8  11  -3    0.65    0.24 
   8 -11   3    0.32    0.24 
  -9  11  -3    1.08    0.27 
   9 -11   3    1.48    0.39 
   7  10  -3    0.24    0.20 
   7  10  -3    0.28    0.17 
  -7 -10   3    0.05    0.15 
  -7 -10   3    0.42    0.19 
   6  10  -3    1.21    0.28 
  -6 -10   3    0.69    0.19 
  -6 -10   3    0.59    0.20 
  -6 -10   3    0.57    0.21 
   5  10  -3    0.16    0.16 
  -5 -10   3    0.24    0.13 
  -5 -10   3    0.04    0.13 
  -5 -10   3   -0.17    0.10 
   4  10  -3    0.11    0.14 
  -4 -10   3    0.06    0.11 
  -4 -10   3    0.06    0.13 
  -4 -10   3    0.13    0.12 
   3  10  -3   -0.06    0.10 
  -3 -10   3   -0.04    0.11 
  -3 -10   3    0.09    0.10 
  -3 -10   3   -0.02    0.10 
   2  10  -3    1.54    0.22 
  -2 -10   3    2.14    0.29 
  -2 -10   3    1.67    0.17 
  -2 -10   3    1.78    0.24 
   1  10  -3    0.07    0.11 
  -1 -10   3    0.22    0.08 
  -1 -10   3    0.02    0.09 
  -1 -10   3    0.15    0.13 
   0  10  -3    3.51    0.21 
   0 -10   3    4.00    0.28 
   0 -10   3    3.71    0.26 
   0 -10   3    3.76    0.31 
  -1  10  -3    0.48    0.12 
   1 -10   3    0.57    0.17 
   1 -10   3    0.72    0.13 
   1 -10   3    0.63    0.14 
  -2  10  -3    1.11    0.16 
   2 -10   3    1.07    0.22 
   2 -10   3    1.47    0.18 
   2 -10   3    1.34    0.17 
  -3  10  -3    0.22    0.11 
   3 -10   3    0.54    0.13 
   3 -10   3    0.49    0.13 
   3 -10   3    0.49    0.18 
  -4  10  -3    0.86    0.18 
   4 -10   3    0.77    0.15 
   4 -10   3    1.06    0.23 
  -5  10  -3    0.84    0.18 
   5 -10   3    0.95    0.18 
   5 -10   3    0.71    0.24 
  -6  10  -3    0.18    0.16 
   6 -10   3    0.22    0.12 
   6 -10   3    0.18    0.19 
  -7  10  -3    0.00    0.14 
   7 -10   3    0.13    0.21 
   7 -10   3    0.06    0.11 
  -8  10  -3   -0.11    0.17 
   8 -10   3   -0.28    0.23 
  -9  10  -3   -0.21    0.17 
   9 -10   3   -0.41    0.25 
   8   9  -3    0.88    0.27 
   8   9  -3    1.29    0.27 
  -8  -9   3    0.67    0.22 
  -8  -9   3    1.15    0.25 
   7   9  -3    1.64    0.31 
   7   9  -3    1.73    0.31 
  -7  -9   3    1.52    0.28 
  -7  -9   3    1.65    0.27 
   6   9  -3    0.26    0.19 
  -6  -9   3    0.01    0.12 
  -6  -9   3   -0.05    0.12 
  -6  -9   3   -0.11    0.13 
   5   9  -3    1.59    0.26 
  -5  -9   3    1.21    0.23 
  -5  -9   3    1.30    0.25 
  -5  -9   3    0.99    0.19 
   4   9  -3    0.89    0.19 
  -4  -9   3    0.68    0.19 
  -4  -9   3    0.74    0.18 
  -4  -9   3    0.57    0.14 
   3   9  -3    0.33    0.14 
  -3  -9   3    0.44    0.15 
  -3  -9   3    0.61    0.16 
  -3  -9   3    0.34    0.11 
   2   9  -3    0.30    0.13 
  -2  -9   3   -0.10    0.08 
  -2  -9   3    0.13    0.08 
  -2  -9   3    0.09    0.10 
   1   9  -3    1.61    0.19 
   1   9  -3    1.77    0.14 
  -1  -9   3    2.16    0.26 
  -1  -9   3    1.56    0.19 
  -1  -9   3    1.76    0.14 
   0   9  -3    0.19    0.08 
   0  -9   3    0.23    0.10 
   0  -9   3    0.11    0.06 
   0  -9   3   -0.06    0.09 
   0  -9   3    0.22    0.09 
  -1   9  -3    8.98    0.35 
   1  -9   3    8.29    0.34 
   1  -9   3    9.07    0.38 
   1  -9   3    9.12    0.44 
  -2   9  -3    7.56    0.34 
   2  -9   3    7.76    0.35 
   2  -9   3    7.85    0.32 
   2  -9   3    8.12    0.42 
  -3   9  -3    5.70    0.32 
   3  -9   3    6.28    0.38 
   3  -9   3    6.67    0.32 
   3  -9   3    6.34    0.28 
  -4   9  -3    0.01    0.12 
   4  -9   3    0.19    0.15 
   4  -9   3    0.12    0.09 
   4  -9   3    0.04    0.10 
  -5   9  -3    0.83    0.17 
   5  -9   3    0.46    0.19 
   5  -9   3    0.67    0.14 
  -6   9  -3    0.73    0.18 
   6  -9   3    0.60    0.14 
   6  -9   3    0.78    0.24 
  -7   9  -3    0.41    0.19 
   7  -9   3    0.47    0.24 
   7  -9   3    0.37    0.14 
  -8   9  -3   -0.06    0.16 
   8  -9   3    0.09    0.24 
   8  -9   3    0.08    0.13 
  -9   9  -3   -0.40    0.14 
   9  -9   3    0.09    0.29 
   8   8  -3    0.22    0.19 
   8   8  -3    0.41    0.21 
  -8  -8   3   -0.06    0.15 
  -8  -8   3    0.26    0.17 
   7   8  -3    0.33    0.19 
   7   8  -3    0.54    0.21 
  -7  -8   3    0.01    0.14 
  -7  -8   3    0.23    0.16 
   6   8  -3   -0.04    0.13 
  -6  -8   3   -0.07    0.12 
  -6  -8   3   -0.15    0.10 
  -6  -8   3    0.04    0.12 
   5   8  -3    0.38    0.15 
  -5  -8   3    0.28    0.14 
  -5  -8   3    0.29    0.14 
  -5  -8   3    0.41    0.14 
   4   8  -3    6.67    0.38 
  -4  -8   3    7.14    0.42 
  -4  -8   3    7.07    0.40 
  -4  -8   3    7.18    0.36 
   3   8  -3    0.22    0.12 
  -3  -8   3    0.25    0.10 
  -3  -8   3    0.14    0.11 
  -3  -8   3    0.23    0.12 
   2   8  -3    0.18    0.10 
  -2  -8   3    0.19    0.11 
  -2  -8   3    0.27    0.08 
  -2  -8   3    0.12    0.11 
   1   8  -3    0.06    0.06 
  -1  -8   3   -0.06    0.08 
  -1  -8   3    0.06    0.08 
  -1  -8   3    0.04    0.09 
  -1  -8   3    0.01    0.06 
   0   8  -3    7.66    0.28 
   0  -8   3    7.25    0.33 
   0  -8   3    7.04    0.23 
   0  -8   3    7.79    0.38 
   0  -8   3    7.42    0.31 
  -1   8  -3    2.11    0.17 
   1  -8   3    1.92    0.16 
   1  -8   3    1.91    0.19 
   1  -8   3    1.96    0.09 
   1  -8   3    2.10    0.23 
  -2   8  -3    3.05    0.22 
   2  -8   3    3.04    0.20 
   2  -8   3    2.80    0.26 
   2  -8   3    2.17    0.18 
  -3   8  -3    1.04    0.16 
   3  -8   3    1.11    0.13 
   3  -8   3    0.96    0.18 
   3  -8   3    1.30    0.16 
  -4   8  -3    2.64    0.23 
   4  -8   3    2.74    0.30 
   4  -8   3    2.38    0.20 
   4  -8   3    2.00    0.18 
  -5   8  -3    0.13    0.12 
   5  -8   3    0.17    0.11 
   5  -8   3    0.16    0.16 
  -6   8  -3    1.54    0.23 
   6  -8   3    1.61    0.21 
   6  -8   3    1.46    0.27 
  -7   8  -3    0.73    0.20 
   7  -8   3    0.61    0.16 
   7  -8   3    0.54    0.26 
  -8   8  -3    0.68    0.21 
   8  -8   3    0.65    0.29 
   8  -8   3    0.49    0.17 
  -9   8  -3   -0.17    0.15 
   9  -8   3    0.05    0.24 
 -10   8  -3   -0.13    0.16 
  10  -8   3   -0.38    0.26 
   9   7  -3    1.01    0.24 
   9   7  -3    0.37    0.26 
  -9  -7   3    0.40    0.21 
  -9  -7   3    0.27    0.19 
   8   7  -3    0.74    0.24 
   8   7  -3    0.54    0.25 
  -8  -7   3    0.19    0.17 
  -8  -7   3    0.09    0.16 
   7   7  -3    1.22    0.27 
   7   7  -3    1.48    0.28 
  -7  -7   3    1.05    0.22 
  -7  -7   3    1.15    0.23 
   6   7  -3    0.16    0.15 
   6   7  -3    0.00    0.14 
  -6  -7   3    0.20    0.14 
  -6  -7   3    0.22    0.15 
  -6  -7   3    0.13    0.12 
   5   7  -3    0.11    0.13 
  -5  -7   3   -0.01    0.10 
  -5  -7   3   -0.09    0.10 
  -5  -7   3   -0.01    0.11 
   4   7  -3    0.33    0.12 
  -4  -7   3    0.13    0.09 
  -4  -7   3    0.09    0.11 
  -4  -7   3    0.12    0.11 
   3   7  -3    1.06    0.17 
  -3  -7   3    1.32    0.15 
  -3  -7   3    1.06    0.17 
  -3  -7   3    1.24    0.20 
   2   7  -3    0.46    0.12 
   2   7  -3    0.50    0.06 
  -2  -7   3    0.65    0.10 
  -2  -7   3    0.38    0.11 
  -2  -7   3    0.42    0.12 
   1   7  -3    3.00    0.15 
  -1  -7   3    2.63    0.19 
  -1  -7   3    2.80    0.20 
  -1  -7   3    2.84    0.16 
  -1  -7   3    2.98    0.23 
   0   7  -3   -0.02    0.06 
   0  -7   3    0.19    0.08 
   0  -7   3    0.14    0.11 
   0  -7   3    0.17    0.05 
   0  -7   3    0.04    0.08 
  -1   7  -3    1.36    0.14 
   1  -7   3    1.42    0.16 
   1  -7   3    1.48    0.19 
   1  -7   3    1.56    0.13 
   1  -7   3    1.51    0.07 
  -2   7  -3    0.38    0.11 
   2  -7   3    0.89    0.16 
   2  -7   3    0.48    0.10 
   2  -7   3    0.62    0.10 
  -3   7  -3    9.21    0.37 
   3  -7   3    8.58    0.41 
   3  -7   3    9.51    0.30 
   3  -7   3    9.69    0.36 
   3  -7   3    9.36    0.22 
  -4   7  -3    0.85    0.16 
  -4   7  -3    0.73    0.07 
   4  -7   3    1.27    0.23 
   4  -7   3    0.99    0.13 
   4  -7   3    0.77    0.14 
  -5   7  -3    0.09    0.12 
  -5   7  -3    0.14    0.05 
   5  -7   3    0.03    0.09 
   5  -7   3    0.09    0.09 
   5  -7   3    0.19    0.18 
  -6   7  -3    0.12    0.12 
   6  -7   3    0.25    0.12 
   6  -7   3   -0.14    0.18 
  -7   7  -3    0.29    0.15 
   7  -7   3    0.19    0.21 
   7  -7   3    0.28    0.15 
  -8   7  -3   -0.20    0.14 
   8  -7   3    0.03    0.14 
   8  -7   3   -0.15    0.22 
  -9   7  -3   -0.19    0.14 
   9  -7   3   -0.33    0.26 
   9  -7   3   -0.19    0.14 
 -10   7  -3   -0.26    0.14 
  10  -7   3   -0.10    0.30 
   9   6  -3    1.31    0.32 
   9   6  -3    2.06    0.34 
  -9  -6   3    1.39    0.28 
  -9  -6   3    1.53    0.29 
   8   6  -3    1.51    0.30 
   8   6  -3    2.33    0.35 
  -8  -6   3    1.34    0.24 
  -8  -6   3    1.72    0.29 
   7   6  -3    0.86    0.23 
   7   6  -3    0.70    0.19 
  -7  -6   3    0.80    0.18 
  -7  -6   3    0.78    0.20 
   6   6  -3    0.48    0.18 
   6   6  -3    0.14    0.13 
  -6  -6   3    0.14    0.13 
  -6  -6   3    0.36    0.15 
   5   6  -3    0.30    0.14 
  -5  -6   3    0.09    0.11 
  -5  -6   3    0.51    0.15 
  -5  -6   3    0.20    0.13 
   4   6  -3    0.07    0.11 
  -4  -6   3    0.23    0.09 
  -4  -6   3    0.19    0.11 
  -4  -6   3    0.16    0.10 
   3   6  -3    0.62    0.14 
  -3  -6   3    0.59    0.12 
  -3  -6   3    0.50    0.13 
  -3  -6   3    0.66    0.11 
   2   6  -3   -0.04    0.08 
   2   6  -3    0.08    0.04 
  -2  -6   3    0.00    0.07 
  -2  -6   3    0.11    0.09 
  -2  -6   3    0.02    0.06 
   1   6  -3    0.94    0.08 
  -1  -6   3    0.82    0.12 
  -1  -6   3    0.94    0.09 
  -1  -6   3    0.89    0.12 
  -1  -6   3    0.84    0.13 
   0   6  -3    2.04    0.13 
   0  -6   3    2.05    0.10 
   0  -6   3    2.10    0.14 
   0  -6   3    2.07    0.18 
   0  -6   3    2.37    0.17 
  -1   6  -3    7.46    0.27 
   1  -6   3    6.88    0.31 
   1  -6   3    7.53    0.29 
   1  -6   3    7.20    0.25 
  -2   6  -3   20.37    0.55 
   2  -6   3   19.51    0.48 
   2  -6   3   19.71    0.55 
   2  -6   3   19.26    0.59 
  -3   6  -3    0.44    0.05 
  -3   6  -3    0.40    0.11 
   3  -6   3    0.55    0.14 
   3  -6   3    0.33    0.09 
   3  -6   3    0.48    0.09 
  -4   6  -3    0.23    0.05 
  -4   6  -3    0.15    0.10 
   4  -6   3    0.21    0.08 
   4  -6   3    0.32    0.10 
   4  -6   3    0.16    0.16 
  -5   6  -3    1.53    0.12 
  -5   6  -3    1.39    0.19 
   5  -6   3    1.16    0.22 
   5  -6   3    1.55    0.15 
   5  -6   3    1.40    0.19 
  -6   6  -3    1.15    0.13 
  -6   6  -3    0.90    0.16 
   6  -6   3    0.89    0.16 
   6  -6   3    1.31    0.14 
   6  -6   3    1.12    0.23 
  -7   6  -3    0.49    0.16 
  -7   6  -3    0.59    0.12 
   7  -6   3    0.70    0.18 
   7  -6   3    0.36    0.21 
  -8   6  -3   -0.06    0.14 
   8  -6   3   -0.10    0.12 
   8  -6   3   -0.06    0.22 
  -9   6  -3   -0.10    0.14 
   9  -6   3   -0.36    0.24 
   9  -6   3   -0.09    0.14 
 -10   6  -3    1.51    0.40 
  10  -6   3    1.09    0.37 
  10  -6   3    0.84    0.28 
   9   5  -3    0.96    0.26 
   9   5  -3    0.83    0.28 
  -9  -5   3    0.82    0.23 
  -9  -5   3    0.71    0.22 
   8   5  -3    0.57    0.24 
   8   5  -3    0.54    0.19 
  -8  -5   3    0.31    0.17 
  -8  -5   3    0.26    0.15 
   7   5  -3    4.31    0.38 
   7   5  -3    4.53    0.39 
  -7  -5   3    3.99    0.33 
  -7  -5   3    4.51    0.36 
   6   5  -3    0.17    0.14 
   6   5  -3    0.31    0.14 
  -6  -5   3    0.11    0.11 
  -6  -5   3    0.21    0.12 
   5   5  -3    7.57    0.38 
  -5  -5   3    7.86    0.38 
  -5  -5   3    7.76    0.42 
  -5  -5   3    8.52    0.41 
   4   5  -3    3.71    0.26 
  -4  -5   3    4.19    0.25 
  -4  -5   3    4.18    0.27 
  -4  -5   3    4.32    0.29 
   3   5  -3    1.75    0.17 
  -3  -5   3    1.88    0.19 
  -3  -5   3    2.26    0.19 
  -3  -5   3    1.80    0.16 
   2   5  -3    1.29    0.07 
   2   5  -3    0.99    0.13 
  -2  -5   3    1.50    0.16 
  -2  -5   3    1.19    0.12 
  -2  -5   3    1.10    0.13 
   1   5  -3    0.98    0.08 
  -1  -5   3    1.00    0.09 
  -1  -5   3    0.79    0.12 
  -1  -5   3    1.09    0.12 
  -1  -5   3    1.02    0.11 
   0   5  -3    2.94    0.15 
   0  -5   3    3.15    0.16 
   0  -5   3    3.18    0.17 
   0  -5   3    3.01    0.19 
   0  -5   3    2.99    0.11 
  -1   5  -3   49.17    1.09 
   1  -5   3   50.20    1.12 
   1  -5   3   51.10    1.16 
   1  -5   3   51.06    1.06 
  -2   5  -3    8.77    0.30 
   2  -5   3    8.92    0.25 
   2  -5   3    9.10    0.35 
   2  -5   3    9.04    0.31 
  -3   5  -3    0.16    0.08 
  -3   5  -3    0.22    0.04 
   3  -5   3    0.15    0.08 
   3  -5   3    0.16    0.06 
   3  -5   3    0.30    0.12 
  -4   5  -3    0.78    0.13 
  -4   5  -3    0.89    0.09 
   4  -5   3    0.82    0.09 
   4  -5   3    0.66    0.12 
   4  -5   3    0.76    0.16 
  -5   5  -3    3.93    0.20 
  -5   5  -3    4.89    0.27 
   5  -5   3    4.45    0.28 
   5  -5   3    4.75    0.33 
   5  -5   3    4.55    0.21 
  -6   5  -3    0.32    0.09 
  -6   5  -3    0.42    0.14 
   6  -5   3    0.33    0.21 
   6  -5   3    0.40    0.09 
   6  -5   3    0.28    0.13 
  -7   5  -3    0.14    0.13 
  -7   5  -3    0.00    0.07 
   7  -5   3    0.21    0.14 
   7  -5   3    0.07    0.19 
   7  -5   3    0.19    0.14 
  -8   5  -3    1.07    0.18 
  -8   5  -3    1.12    0.19 
   8  -5   3    0.76    0.25 
   8  -5   3    0.97    0.21 
  -9   5  -3   -0.04    0.13 
   9  -5   3    0.08    0.17 
   9  -5   3   -0.10    0.22 
  10  -5   3    0.59    0.33 
  10  -5   3    1.13    0.27 
  10   4  -3   -0.06    0.25 
  10   4  -3    0.80    0.26 
 -10  -4   3    0.19    0.17 
 -10  -4   3    0.64    0.32 
   9   4  -3    1.07    0.28 
   9   4  -3    1.35    0.30 
  -9  -4   3    0.90    0.23 
  -9  -4   3    1.13    0.24 
   8   4  -3    0.26    0.18 
   8   4  -3   -0.05    0.18 
  -8  -4   3    0.14    0.14 
  -8  -4   3    0.01    0.13 
   7   4  -3   -0.17    0.13 
   7   4  -3    0.11    0.15 
  -7  -4   3    0.10    0.12 
  -7  -4   3    0.05    0.12 
   6   4  -3    1.97    0.25 
   6   4  -3    2.02    0.27 
  -6  -4   3    1.88    0.23 
  -6  -4   3    2.05    0.25 
   5   4  -3    4.26    0.29 
   5   4  -3    3.00    0.26 
  -5  -4   3    3.38    0.25 
  -5  -4   3    3.36    0.27 
   4   4  -3    0.23    0.11 
  -4  -4   3    0.20    0.09 
  -4  -4   3    0.38    0.12 
  -4  -4   3    0.23    0.10 
   3   4  -3    5.92    0.27 
  -3  -4   3    5.08    0.27 
  -3  -4   3    5.93    0.26 
  -3  -4   3    5.55    0.26 
   2   4  -3    5.25    0.23 
   2   4  -3    5.09    0.14 
  -2  -4   3    4.74    0.20 
  -2  -4   3    5.52    0.25 
  -2  -4   3    5.14    0.23 
   1   4  -3    0.96    0.07 
  -1  -4   3    1.13    0.13 
  -1  -4   3    0.92    0.10 
  -1  -4   3    1.06    0.09 
  -1  -4   3    0.75    0.10 
   0   4  -3    0.85    0.08 
   0  -4   3    0.73    0.10 
   0  -4   3    0.80    0.08 
   0  -4   3    0.83    0.10 
   0  -4   3    0.83    0.06 
  -1   4  -3   24.13    0.57 
   1  -4   3   24.06    0.59 
   1  -4   3   23.88    0.61 
   1  -4   3   24.48    0.52 
  -2   4  -3    9.42    0.22 
  -2   4  -3    9.50    0.30 
   2  -4   3    9.32    0.24 
   2  -4   3    9.20    0.31 
   2  -4   3    9.43    0.34 
  -3   4  -3   11.95    0.38 
  -3   4  -3   11.82    0.31 
   3  -4   3   12.24    0.39 
   3  -4   3   12.59    0.31 
   3  -4   3   12.27    0.42 
  -4   4  -3    0.01    0.04 
  -4   4  -3   -0.10    0.07 
   4  -4   3   -0.02    0.11 
   4  -4   3    0.05    0.05 
   4  -4   3   -0.04    0.09 
  -5   4  -3   -0.07    0.05 
  -5   4  -3    0.13    0.10 
  -5   4  -3    0.00    0.05 
   5  -4   3   -0.07    0.10 
   5  -4   3   -0.07    0.14 
  -6   4  -3    0.19    0.08 
  -6   4  -3    0.21    0.09 
  -6   4  -3    0.19    0.12 
   6  -4   3    0.45    0.20 
   6  -4   3    0.24    0.13 
  -7   4  -3    1.36    0.17 
  -7   4  -3    1.17    0.18 
  -7   4  -3    1.09    0.16 
   7  -4   3    1.13    0.25 
   7  -4   3    1.38    0.22 
  -8   4  -3    0.86    0.16 
  -8   4  -3    0.80    0.18 
   8  -4   3    0.77    0.28 
   8  -4   3    0.59    0.21 
  -9   4  -3   -0.01    0.12 
  -9   4  -3    0.15    0.11 
   9  -4   3    0.01    0.16 
   9  -4   3    0.06    0.25 
 -10   4  -3    0.07    0.18 
  10  -4   3   -0.37    0.26 
  10  -4   3   -0.23    0.17 
  10   3  -3   -0.35    0.21 
  10   3  -3    0.96    0.27 
 -10  -3   3    0.46    0.19 
 -10  -3   3    0.17    0.15 
   9   3  -3    2.60    0.37 
   9   3  -3    3.25    0.43 
  -9  -3   3    3.05    0.35 
  -9  -3   3    3.12    0.37 
   8   3  -3    0.71    0.23 
   8   3  -3    0.57    0.21 
  -8  -3   3    0.46    0.16 
  -8  -3   3    0.44    0.16 
   7   3  -3    1.76    0.28 
   7   3  -3    2.16    0.27 
  -7  -3   3    1.65    0.24 
  -7  -3   3    1.81    0.23 
   6   3  -3    0.21    0.14 
   6   3  -3    0.37    0.16 
  -6  -3   3    0.21    0.12 
  -6  -3   3    0.19    0.11 
   5   3  -3    0.07    0.11 
   5   3  -3    0.07    0.11 
  -5  -3   3    0.14    0.11 
  -5  -3   3    0.18    0.04 
  -5  -3   3    0.09    0.10 
   4   3  -3    0.22    0.10 
  -4  -3   3    0.29    0.10 
  -4  -3   3    0.22    0.09 
  -4  -3   3    0.37    0.05 
  -4  -3   3    0.37    0.12 
   3   3  -3    0.39    0.10 
  -3  -3   3    0.44    0.11 
  -3  -3   3    0.27    0.08 
  -3  -3   3    0.44    0.10 
  -3  -3   3    0.39    0.04 
   2   3  -3    3.64    0.18 
  -2  -3   3    3.80    0.19 
  -2  -3   3    3.99    0.21 
  -2  -3   3    3.72    0.17 
  -2  -3   3    3.77    0.11 
   1   3  -3    6.96    0.18 
  -1  -3   3    6.19    0.20 
  -1  -3   3    6.91    0.24 
  -1  -3   3    7.24    0.23 
  -1  -3   3    6.59    0.22 
   0   3  -3   40.13    0.84 
   0  -3   3   39.62    0.83 
   0  -3   3   39.94    0.88 
   0  -3   3   39.89    0.80 
   0  -3   3   40.02    0.87 
  -1   3  -3   41.51    0.88 
   1  -3   3   40.59    0.90 
   1  -3   3   41.50    0.82 
   1  -3   3   40.37    0.89 
  -2   3  -3    5.95    0.17 
  -2   3  -3    5.87    0.22 
   2  -3   3    5.93    0.16 
   2  -3   3    6.16    0.23 
   2  -3   3    5.69    0.24 
  -3   3  -3    3.30    0.13 
  -3   3  -3    3.29    0.15 
  -3   3  -3    3.25    0.18 
   3  -3   3    3.75    0.24 
   3  -3   3    3.49    0.20 
  -4   3  -3    0.51    0.08 
  -4   3  -3    0.51    0.11 
  -4   3  -3    0.44    0.08 
   4  -3   3    0.56    0.15 
   4  -3   3    0.67    0.13 
  -5   3  -3    3.01    0.17 
  -5   3  -3    2.74    0.18 
  -5   3  -3    2.82    0.21 
   5  -3   3    3.06    0.28 
   5  -3   3    3.44    0.26 
  -6   3  -3    0.22    0.11 
  -6   3  -3    0.33    0.10 
  -6   3  -3    0.21    0.08 
   6  -3   3    0.53    0.16 
   6  -3   3    0.53    0.19 
  -7   3  -3    0.88    0.15 
  -7   3  -3    0.99    0.16 
  -7   3  -3    1.10    0.16 
   7  -3   3    1.18    0.26 
   7  -3   3    0.93    0.18 
  -8   3  -3   -0.13    0.11 
  -8   3  -3    0.12    0.10 
  -8   3  -3   -0.17    0.08 
   8  -3   3   -0.13    0.14 
   8  -3   3    0.26    0.22 
  -9   3  -3    0.52    0.16 
   9  -3   3    0.47    0.29 
   9  -3   3    0.22    0.19 
 -10   3  -3    0.26    0.14 
  10  -3   3    0.16    0.22 
  10  -3   3    0.72    0.32 
  10   2  -3    0.99    0.31 
  10   2  -3    1.41    0.33 
 -10  -2   3    1.01    0.25 
 -10  -2   3    1.14    0.25 
   9   2  -3    0.40    0.23 
   9   2  -3    0.23    0.21 
  -9  -2   3    0.41    0.17 
  -9  -2   3    0.40    0.16 
   8   2  -3    0.87    0.22 
   8   2  -3    1.03    0.26 
  -8  -2   3    1.03    0.21 
  -8  -2   3    1.10    0.22 
   7   2  -3    0.13    0.15 
   7   2  -3    0.14    0.15 
  -7  -2   3    0.00    0.10 
  -7  -2   3    0.07    0.11 
   6   2  -3    1.69    0.22 
   6   2  -3    1.15    0.20 
  -6  -2   3    1.24    0.18 
  -6  -2   3    1.41    0.16 
  -6  -2   3    1.38    0.19 
   5   2  -3    0.00    0.09 
   5   2  -3   -0.02    0.10 
  -5  -2   3    0.06    0.05 
  -5  -2   3    0.09    0.09 
  -5  -2   3   -0.04    0.08 
   4   2  -3    4.83    0.25 
   4   2  -3    4.76    0.27 
  -4  -2   3    4.98    0.25 
  -4  -2   3    4.96    0.17 
  -4  -2   3    5.11    0.26 
   3   2  -3    0.00    0.06 
  -3  -2   3    0.05    0.07 
  -3  -2   3   -0.07    0.05 
  -3  -2   3    0.05    0.03 
  -3  -2   3   -0.01    0.05 
   2   2  -3    8.02    0.26 
  -2  -2   3    8.59    0.29 
  -2  -2   3    8.03    0.27 
  -2  -2   3    8.21    0.26 
  -2  -2   3    8.38    0.21 
  -1  -2   3    5.62    0.16 
  -1  -2   3    5.59    0.19 
  -1  -2   3    5.96    0.19 
  -1  -2   3    5.90    0.18 
  -1  -2   3    5.68    0.20 
   0   2  -3  292.89    5.89 
   0  -2   3  290.60    5.85 
   0  -2   3  306.45    5.95 
   0  -2   3  292.06    6.00 
   0  -2   3  292.80    5.82 
  -1   2  -3   39.66    0.79 
  -1   2  -3   38.23    0.83 
   1  -2   3   38.81    0.83 
   1  -2   3   39.83    0.85 
  -2   2  -3   14.40    0.37 
  -2   2  -3   14.22    0.35 
  -2   2  -3   14.16    0.32 
   2  -2   3   14.58    0.39 
  -3   2  -3   11.29    0.30 
  -3   2  -3   10.80    0.33 
  -3   2  -3   10.99    0.32 
   3  -2   3   11.22    0.37 
   3  -2   3   10.74    0.36 
  -4   2  -3    9.66    0.32 
  -4   2  -3    9.63    0.30 
  -4   2  -3    9.29    0.32 
   4  -2   3    9.44    0.36 
   4  -2   3    9.99    0.37 
  -5   2  -3   -0.01    0.07 
  -5   2  -3   -0.02    0.05 
  -5   2  -3    0.14    0.08 
   5  -2   3   -0.04    0.12 
   5  -2   3    0.12    0.14 
  -6   2  -3    0.08    0.09 
  -6   2  -3    0.12    0.08 
  -6   2  -3    0.12    0.08 
   6  -2   3    0.27    0.14 
   6  -2   3    0.39    0.17 
  -7   2  -3    1.55    0.19 
  -7   2  -3    1.36    0.17 
  -7   2  -3    1.26    0.18 
   7  -2   3    0.98    0.20 
   7  -2   3    1.24    0.25 
  -8   2  -3    0.05    0.10 
  -8   2  -3    0.04    0.09 
   8  -2   3   -0.01    0.19 
   8  -2   3   -0.17    0.16 
  -9   2  -3    0.74    0.18 
   9  -2   3    0.14    0.21 
   9  -2   3    0.50    0.27 
 -10   2  -3    2.35    0.30 
  10  -2   3    2.56    0.43 
  10  -2   3    2.65    0.39 
  10   1  -3    1.23    0.31 
  10   1  -3    2.14    0.39 
 -10  -1   3    1.86    0.31 
 -10  -1   3    1.92    0.29 
   9   1  -3    0.16    0.21 
   9   1  -3    0.30    0.23 
  -9  -1   3    0.08    0.14 
  -9  -1   3    0.09    0.13 
   8   1  -3    0.26    0.18 
   8   1  -3   -0.06    0.17 
  -8  -1   3    0.06    0.11 
  -8  -1   3   -0.04    0.11 
   7   1  -3    5.94    0.36 
   7   1  -3    4.91    0.39 
  -7  -1   3    5.14    0.33 
  -7  -1   3    5.37    0.33 
   6   1  -3    0.35    0.14 
   6   1  -3    0.63    0.16 
  -6  -1   3    0.40    0.08 
  -6  -1   3    0.43    0.13 
  -6  -1   3    0.26    0.11 
   5   1  -3   -0.14    0.08 
   5   1  -3    0.21    0.10 
  -5  -1   3   -0.01    0.05 
  -5  -1   3   -0.05    0.08 
  -5  -1   3    0.06    0.08 
   4   1  -3   14.61    0.43 
   4   1  -3   13.98    0.48 
  -4  -1   3   14.23    0.38 
  -4  -1   3   14.57    0.45 
  -4  -1   3   14.59    0.46 
   3   1  -3    3.17    0.16 
   3   1  -3    3.07    0.20 
  -3  -1   3    3.25    0.17 
  -3  -1   3    3.22    0.19 
  -3  -1   3    3.17    0.13 
   2   1  -3    5.54    0.22 
   2   1  -3    5.47    0.18 
  -2  -1   3    5.31    0.20 
  -2  -1   3    5.48    0.16 
  -2  -1   3    5.32    0.19 
  -1  -1   3    6.08    0.18 
  -1  -1   3    5.84    0.19 
  -1  -1   3    5.96    0.17 
  -1  -1   3    5.93    0.17 
  -1  -1   3    6.20    0.19 
   0   1  -3   47.96    0.95 
   0   1  -3   47.46    0.96 
   0  -1   3   47.21    0.97 
   0  -1   3   46.89    0.95 
   0  -1   3   47.62    0.97 
  -1   1  -3   12.09    0.30 
  -1   1  -3   11.49    0.29 
  -1   1  -3   12.65    0.27 
   1  -1   3   12.02    0.29 
   1  -1   3   12.24    0.32 
  -2   1  -3    0.07    0.05 
  -2   1  -3    0.07    0.04 
  -2   1  -3    0.07    0.05 
   2  -1   3    0.09    0.07 
   2  -1   3   -0.04    0.05 
  -3   1  -3   22.31    0.54 
  -3   1  -3   22.49    0.54 
  -3   1  -3   22.87    0.56 
   3  -1   3   22.65    0.58 
   3  -1   3   23.25    0.61 
  -4   1  -3    7.06    0.25 
  -4   1  -3    6.76    0.25 
  -4   1  -3    6.96    0.28 
   4  -1   3    7.08    0.30 
   4  -1   3    6.46    0.30 
  -5   1  -3    3.49    0.22 
  -5   1  -3    3.55    0.19 
  -5   1  -3    3.52    0.20 
   5  -1   3    3.30    0.26 
   5  -1   3    3.21    0.25 
  -6   1  -3    4.96    0.28 
  -6   1  -3    5.47    0.29 
  -6   1  -3    5.19    0.25 
   6  -1   3    5.64    0.36 
   6  -1   3    5.71    0.35 
  -7   1  -3    1.36    0.19 
  -7   1  -3    1.10    0.15 
  -7   1  -3    1.38    0.19 
   7  -1   3    1.48    0.25 
   7  -1   3    1.37    0.23 
  -8   1  -3    1.02    0.19 
  -8   1  -3    0.82    0.17 
   8  -1   3    0.80    0.24 
   8  -1   3    0.94    0.25 
  -9   1  -3    0.24    0.15 
  -9   1  -3    0.29    0.15 
   9  -1   3    0.36    0.25 
   9  -1   3    0.14    0.22 
 -10   1  -3    1.71    0.27 
  10  -1   3    1.59    0.36 
  10  -1   3    1.39    0.34 
  10   0  -3    2.00    0.37 
 -10   0   3    2.05    0.30 
 -10   0   3    1.62    0.30 
   9   0  -3    0.40    0.22 
   9   0  -3    0.87    0.28 
  -9   0   3    0.43    0.17 
  -9   0   3    0.52    0.19 
   8   0  -3    1.23    0.25 
   8   0  -3    1.23    0.27 
  -8   0   3    1.52    0.24 
  -8   0   3    1.04    0.20 
   7   0  -3    0.46    0.16 
   7   0  -3    0.20    0.16 
  -7   0   3    0.39    0.10 
  -7   0   3    0.56    0.14 
  -7   0   3    0.47    0.14 
   6   0  -3    0.16    0.15 
   6   0  -3    0.15    0.13 
  -6   0   3    0.12    0.07 
  -6   0   3    0.20    0.11 
  -6   0   3    0.10    0.09 
   5   0  -3    8.12    0.34 
   5   0  -3    8.14    0.39 
  -5   0   3    8.83    0.35 
  -5   0   3    8.32    0.36 
  -5   0   3    8.78    0.30 
   4   0  -3    4.70    0.22 
   4   0  -3    4.77    0.26 
  -4   0   3    5.11    0.20 
  -4   0   3    5.07    0.25 
  -4   0   3    4.92    0.23 
   3   0  -3    0.98    0.13 
   3   0  -3    1.21    0.11 
  -3   0   3    1.37    0.10 
  -3   0   3    1.09    0.12 
  -3   0   3    1.44    0.12 
   2   0  -3   14.24    0.34 
   2   0  -3   13.96    0.39 
  -2   0   3   14.54    0.38 
  -2   0   3   14.11    0.35 
  -2   0   3   14.16    0.37 
   1   0  -3   11.32    0.29 
   1   0  -3   11.23    0.24 
  -1   0   3   11.13    0.28 
  -1   0   3   11.18    0.29 
  -1   0   3   10.80    0.28 
   0   0  -3  166.07    3.25 
   0   0  -3  162.52    3.20 
   0   0  -3  167.02    3.20 
   0   0   3  154.49    3.19 
   0   0   3  163.73    3.26 
   0   0   3  164.09    3.20 
  -1   0  -3    0.03    0.07 
   1   0   3    0.41    0.09 
   1   0   3    0.26    0.05 
   1   0   3    0.27    0.04 
  -2   0  -3   12.86    0.35 
  -2   0  -3   12.63    0.31 
  -2   0  -3   12.79    0.33 
   2   0   3   12.39    0.33 
   2   0   3   12.46    0.36 
  -3   0  -3    0.87    0.11 
  -3   0  -3    0.97    0.09 
  -3   0  -3    1.06    0.11 
   3   0   3    1.01    0.15 
   3   0   3    0.79    0.11 
  -4   0  -3    0.27    0.08 
  -4   0  -3    0.45    0.08 
  -4   0  -3    0.42    0.10 
   4   0   3    0.52    0.14 
   4   0   3    0.53    0.11 
  -5   0  -3   17.03    0.52 
  -5   0  -3   16.35    0.53 
  -5   0  -3   16.99    0.46 
   5   0   3   16.44    0.56 
   5   0   3   17.53    0.58 
  -6   0  -3    0.12    0.08 
  -6   0  -3    0.35    0.10 
  -6   0  -3    0.43    0.12 
   6   0   3   -0.09    0.15 
   6   0   3    0.19    0.14 
  -7   0  -3    0.50    0.13 
  -7   0  -3    0.59    0.15 
   7   0   3    0.60    0.19 
   7   0   3    0.76    0.21 
  -8   0  -3    0.40    0.13 
  -8   0  -3    0.13    0.12 
   8   0   3    0.36    0.22 
   8   0   3    0.32    0.19 
  -9   0  -3    0.63    0.18 
  -9   0  -3    0.80    0.19 
   9   0   3    0.95    0.29 
   9   0   3    0.72    0.25 
 -10   0  -3    0.05    0.14 
  10   0   3    0.33    0.25 
  10   0   3   -0.48    0.21 
  10  -1  -3    0.12    0.23 
 -10   1   3   -0.06    0.16 
 -10   1   3    0.12    0.14 
   9  -1  -3    0.05    0.18 
   9  -1  -3    0.41    0.26 
  -9   1   3    0.17    0.13 
  -9   1   3    0.25    0.15 
   8  -1  -3    0.44    0.23 
   8  -1  -3    0.15    0.16 
  -8   1   3    0.39    0.13 
  -8   1   3    0.30    0.11 
  -8   1   3    0.57    0.16 
   7  -1  -3    5.12    0.39 
   7  -1  -3    5.18    0.33 
  -7   1   3    5.01    0.32 
  -7   1   3    5.16    0.27 
  -7   1   3    4.92    0.32 
   6  -1  -3   -0.03    0.11 
   6  -1  -3    0.05    0.16 
  -6   1   3    0.04    0.07 
  -6   1   3    0.08    0.10 
  -6   1   3    0.02    0.09 
   5  -1  -3    4.53    0.25 
   5  -1  -3    4.24    0.29 
  -5   1   3    4.10    0.25 
  -5   1   3    4.23    0.22 
  -5   1   3    4.82    0.27 
   4  -1  -3    3.57    0.24 
   4  -1  -3    3.84    0.19 
  -4   1   3    3.97    0.22 
  -4   1   3    3.84    0.19 
  -4   1   3    3.68    0.21 
   3  -1  -3    0.77    0.13 
   3  -1  -3    1.07    0.10 
  -3   1   3    0.70    0.10 
  -3   1   3    0.77    0.09 
  -3   1   3    0.59    0.08 
   2  -1  -3  122.03    2.38 
   2  -1  -3  121.17    2.45 
   2  -1  -3  117.25    2.46 
  -2   1   3  120.64    2.44 
  -2   1   3  124.55    2.44 
   1  -1  -3   62.15    1.29 
   1  -1  -3   62.32    1.28 
  -1   1   3   63.15    1.28 
  -1   1   3   61.40    1.28 
   0  -1  -3  114.59    2.27 
   0  -1  -3  113.92    2.23 
   0  -1  -3  109.09    2.26 
   0   1   3  112.84    2.23 
   0   1   3  116.10    2.25 
  -1  -1  -3    3.93    0.17 
  -1  -1  -3    3.90    0.16 
  -1  -1  -3    3.65    0.13 
   1   1   3    3.83    0.13 
   1   1   3    4.01    0.16 
  -2  -1  -3    0.35    0.06 
  -2  -1  -3    0.31    0.05 
  -2  -1  -3    0.20    0.07 
  -2  -1  -3    0.26    0.08 
   2   1   3    0.13    0.08 
  -3  -1  -3   12.99    0.40 
  -3  -1  -3   13.16    0.33 
  -3  -1  -3   14.02    0.42 
   3   1   3   13.31    0.40 
   3   1   3   13.39    0.42 
  -4  -1  -3   13.80    0.44 
  -4  -1  -3   13.14    0.44 
  -4  -1  -3   13.61    0.35 
   4   1   3   13.03    0.46 
   4   1   3   13.90    0.45 
  -5  -1  -3    0.57    0.08 
  -5  -1  -3    0.30    0.11 
  -5  -1  -3    0.23    0.09 
   5   1   3    0.30    0.16 
   5   1   3    0.43    0.13 
  -6  -1  -3    2.75    0.23 
  -6  -1  -3    2.90    0.23 
   6   1   3    2.67    0.24 
   6   1   3    3.59    0.33 
  -7  -1  -3    0.24    0.13 
  -7  -1  -3    0.40    0.13 
   7   1   3    0.66    0.22 
   7   1   3    0.27    0.14 
  -8  -1  -3   -0.13    0.09 
  -8  -1  -3    0.02    0.12 
   8   1   3    0.16    0.16 
   8   1   3   -0.24    0.18 
  -9  -1  -3    2.74    0.34 
  -9  -1  -3    3.32    0.32 
   9   1   3    3.01    0.39 
   9   1   3    3.10    0.42 
 -10  -1  -3    0.07    0.14 
  10   1   3    0.73    0.27 
  10   1   3   -0.16    0.26 
  10  -2  -3    0.15    0.25 
  10  -2  -3    0.64    0.17 
 -10   2   3    0.25    0.15 
   9  -2  -3   -0.02    0.24 
  -9   2   3   -0.03    0.14 
  -9   2   3    0.02    0.10 
   8  -2  -3    0.25    0.16 
   8  -2  -3    0.47    0.24 
  -8   2   3    0.37    0.12 
  -8   2   3    0.33    0.15 
  -8   2   3    0.51    0.16 
   7  -2  -3    1.29    0.20 
   7  -2  -3    1.25    0.25 
  -7   2   3    1.35    0.20 
  -7   2   3    1.25    0.17 
  -7   2   3    1.42    0.17 
   6  -2  -3   -0.17    0.09 
   6  -2  -3   -0.13    0.14 
  -6   2   3    0.09    0.09 
  -6   2   3    0.04    0.08 
  -6   2   3    0.10    0.09 
   5  -2  -3    0.17    0.14 
   5  -2  -3    0.27    0.10 
  -5   2   3    0.25    0.09 
  -5   2   3    0.13    0.09 
  -5   2   3    0.34    0.10 
   4  -2  -3    3.58    0.25 
   4  -2  -3    3.57    0.18 
  -4   2   3    3.60    0.19 
  -4   2   3    3.49    0.21 
  -4   2   3    3.64    0.20 
   3  -2  -3    2.98    0.21 
   3  -2  -3    3.18    0.14 
   3  -2  -3    2.84    0.17 
  -3   2   3    2.78    0.16 
  -3   2   3    2.69    0.16 
   2  -2  -3    1.84    0.08 
   2  -2  -3    1.61    0.16 
   2  -2  -3    1.73    0.14 
  -2   2   3    1.66    0.12 
  -2   2   3    1.61    0.12 
   1  -2  -3   36.89    0.81 
   1  -2  -3   36.86    0.82 
   1  -2  -3   35.83    0.82 
  -1   2   3   37.96    0.81 
   0  -2  -3   13.37    0.34 
   0  -2  -3   13.27    0.35 
   0  -2  -3   13.54    0.37 
   0   2   3   13.67    0.34 
   0   2   3   13.82    0.32 
  -1  -2  -3    3.24    0.17 
  -1  -2  -3    3.21    0.14 
  -1  -2  -3    3.25    0.18 
   1   2   3    3.25    0.12 
   1   2   3    3.01    0.15 
  -2  -2  -3   14.12    0.42 
  -2  -2  -3   14.73    0.40 
  -2  -2  -3   15.17    0.42 
   2   2   3   14.62    0.42 
   2   2   3   14.79    0.34 
  -3  -2  -3    7.39    0.29 
  -3  -2  -3    7.46    0.29 
  -3  -2  -3    7.68    0.20 
  -3  -2  -3    6.92    0.29 
   3   2   3    7.12    0.30 
  -4  -2  -3    2.76    0.12 
  -4  -2  -3    3.29    0.21 
  -4  -2  -3    2.89    0.20 
   4   2   3    2.76    0.20 
   4   2   3    3.33    0.24 
  -5  -2  -3    4.56    0.28 
  -5  -2  -3    4.34    0.17 
  -5  -2  -3    4.41    0.27 
   5   2   3    4.18    0.31 
   5   2   3    4.64    0.29 
  -6  -2  -3    1.33    0.19 
  -6  -2  -3    1.18    0.19 
   6   2   3    1.20    0.20 
   6   2   3    1.20    0.22 
  -7  -2  -3    0.02    0.11 
  -7  -2  -3    0.25    0.12 
   7   2   3    0.06    0.13 
   7   2   3    0.00    0.16 
  -8  -2  -3    0.00    0.11 
  -8  -2  -3    0.11    0.11 
   8   2   3   -0.24    0.18 
   8   2   3    0.17    0.16 
  -9  -2  -3    2.04    0.29 
  -9  -2  -3    2.11    0.31 
   9   2   3    2.33    0.34 
   9   2   3    1.81    0.33 
 -10  -2  -3    0.56    0.20 
 -10  -2  -3    1.12    0.32 
  10   2   3    1.28    0.30 
  10   2   3    0.42    0.31 
  10  -3  -3    0.84    0.20 
  10  -3  -3    0.45    0.33 
 -10   3   3    0.67    0.20 
   9  -3  -3    0.50    0.17 
   9  -3  -3    0.32    0.25 
  -9   3   3    0.39    0.15 
  -9   3   3    0.07    0.12 
   8  -3  -3    0.26    0.23 
   8  -3  -3    0.36    0.14 
   8  -3  -3    0.03    0.13 
  -8   3   3    0.04    0.10 
  -8   3   3    0.36    0.13 
   7  -3  -3    0.61    0.15 
   7  -3  -3    0.41    0.14 
   7  -3  -3    0.33    0.22 
  -7   3   3    0.38    0.12 
  -7   3   3    0.22    0.11 
   6  -3  -3    0.73    0.23 
   6  -3  -3    0.94    0.15 
   6  -3  -3    0.57    0.13 
  -6   3   3    0.92    0.15 
  -6   3   3    0.72    0.14 
   5  -3  -3    0.40    0.17 
   5  -3  -3    0.36    0.10 
   5  -3  -3    0.82    0.12 
  -5   3   3    0.40    0.10 
  -5   3   3    0.70    0.12 
   4  -3  -3    1.02    0.18 
   4  -3  -3    1.06    0.14 
   4  -3  -3    1.26    0.12 
  -4   3   3    1.11    0.12 
  -4   3   3    0.82    0.12 
   3  -3  -3   19.34    0.45 
   3  -3  -3   19.08    0.53 
   3  -3  -3   19.10    0.57 
  -3   3   3   19.48    0.50 
  -3   3   3   18.29    0.51 
   2  -3  -3    0.38    0.12 
   2  -3  -3    0.23    0.08 
   2  -3  -3    0.37    0.05 
  -2   3   3    0.33    0.08 
  -2   3   3    0.36    0.07 
   1  -3  -3   16.81    0.39 
   1  -3  -3   16.98    0.47 
   1  -3  -3   17.26    0.44 
   1  -3  -3   17.54    0.47 
  -1   3   3   16.98    0.44 
   0  -3  -3    0.21    0.07 
   0  -3  -3    0.27    0.09 
   0  -3  -3    0.09    0.08 
   0   3   3    0.16    0.05 
   0   3   3    0.07    0.05 
  -1  -3  -3    5.82    0.25 
  -1  -3  -3    5.46    0.21 
  -1  -3  -3    5.33    0.22 
   1   3   3    5.39    0.17 
   1   3   3    5.82    0.22 
  -2  -3  -3    4.69    0.21 
  -2  -3  -3    4.64    0.23 
  -2  -3  -3    4.73    0.23 
   2   3   3    4.30    0.22 
   2   3   3    4.59    0.14 
  -3  -3  -3    2.32    0.19 
  -3  -3  -3    2.23    0.17 
  -3  -3  -3    2.43    0.09 
  -3  -3  -3    2.62    0.19 
   3   3   3    2.32    0.20 
  -4  -3  -3    6.04    0.30 
  -4  -3  -3    5.74    0.29 
  -4  -3  -3    5.67    0.16 
  -4  -3  -3    5.20    0.28 
   4   3   3    5.43    0.29 
   4   3   3    5.53    0.33 
  -5  -3  -3    0.01    0.10 
  -5  -3  -3   -0.01    0.08 
   5   3   3    0.11    0.10 
   5   3   3    0.08    0.14 
  -6  -3  -3    0.16    0.11 
  -6  -3  -3    0.12    0.11 
   6   3   3    0.16    0.13 
   6   3   3    0.06    0.17 
  -7  -3  -3    0.20    0.14 
  -7  -3  -3    0.34    0.14 
   7   3   3    0.40    0.16 
   7   3   3    0.25    0.21 
  -8  -3  -3    1.87    0.27 
  -8  -3  -3    2.02    0.28 
   8   3   3    1.69    0.33 
   8   3   3    1.82    0.29 
  -9  -3  -3    1.04    0.25 
  -9  -3  -3    0.69    0.21 
   9   3   3    0.57    0.30 
   9   3   3    1.24    0.27 
  10  -4  -3    0.44    0.33 
 -10   4   3    0.37    0.15 
   9  -4  -3    0.13    0.28 
   9  -4  -3    0.21    0.13 
  -9   4   3    0.11    0.11 
  -9   4   3   -0.07    0.12 
   8  -4  -3   -0.31    0.19 
   8  -4  -3    0.15    0.12 
  -8   4   3    0.01    0.12 
  -8   4   3   -0.07    0.09 
   7  -4  -3   -0.01    0.10 
   7  -4  -3   -0.19    0.19 
   7  -4  -3    0.15    0.11 
  -7   4   3   -0.01    0.11 
  -7   4   3    0.13    0.10 
   6  -4  -3    0.79    0.15 
   6  -4  -3    0.75    0.12 
   6  -4  -3    0.67    0.21 
  -6   4   3    0.58    0.14 
  -6   4   3    0.76    0.13 
   5  -4  -3    2.01    0.26 
   5  -4  -3    2.54    0.17 
   5  -4  -3    2.15    0.20 
  -5   4   3    2.28    0.21 
  -5   4   3    2.12    0.17 
   4  -4  -3    3.77    0.28 
   4  -4  -3    3.82    0.24 
   4  -4  -3    3.68    0.17 
  -4   4   3    3.17    0.21 
  -4   4   3    3.42    0.19 
   3  -4  -3   14.55    0.37 
   3  -4  -3   14.82    0.46 
   3  -4  -3   13.50    0.49 
  -3   4   3   14.60    0.44 
  -3   4   3   14.97    0.41 
   2  -4  -3    2.77    0.12 
   2  -4  -3    2.42    0.20 
   2  -4  -3    2.81    0.21 
   2  -4  -3    2.73    0.15 
  -2   4   3    2.58    0.17 
   1  -4  -3   22.95    0.62 
   1  -4  -3   23.53    0.57 
   1  -4  -3   22.90    0.53 
   1  -4  -3   21.90    0.61 
  -1   4   3   24.74    0.58 
   0  -4  -3    0.08    0.10 
   0  -4  -3    0.11    0.08 
   0  -4  -3    0.03    0.06 
   0   4   3    0.04    0.06 
   0   4   3    0.03    0.05 
  -1  -4  -3    2.54    0.16 
  -1  -4  -3    2.98    0.19 
  -1  -4  -3    2.75    0.19 
   1   4   3    2.79    0.12 
   1   4   3    2.83    0.17 
  -2  -4  -3    9.37    0.35 
  -2  -4  -3    9.82    0.34 
  -2  -4  -3    9.25    0.33 
   2   4   3    9.36    0.24 
   2   4   3    8.81    0.34 
  -3  -4  -3    6.41    0.31 
  -3  -4  -3    6.50    0.31 
  -3  -4  -3    5.87    0.29 
  -3  -4  -3    6.65    0.16 
   3   4   3    6.81    0.32 
  -4  -4  -3    1.25    0.17 
  -4  -4  -3    0.99    0.15 
  -4  -4  -3    1.44    0.19 
   4   4   3    1.67    0.22 
  -5  -4  -3    0.11    0.11 
  -5  -4  -3    0.23    0.13 
   5   4   3    0.15    0.11 
   5   4   3    0.21    0.16 
  -6  -4  -3    0.10    0.11 
  -6  -4  -3    0.08    0.12 
   6   4   3    0.12    0.17 
   6   4   3    0.07    0.12 
  -7  -4  -3    0.89    0.19 
  -7  -4  -3    1.13    0.21 
   7   4   3    1.05    0.26 
   7   4   3    1.19    0.22 
  -8  -4  -3    2.22    0.30 
  -8  -4  -3    1.52    0.26 
   8   4   3    1.80    0.28 
   8   4   3    2.23    0.36 
  -9  -4  -3   -0.13    0.12 
  -9  -4  -3   -0.03    0.14 
   9   4   3    0.68    0.21 
   9   4   3   -0.21    0.23 
  10  -5  -3   -0.15    0.30 
 -10   5   3    0.41    0.16 
 -10   5   3    0.24    0.24 
   9  -5  -3    0.49    0.17 
   9  -5  -3    0.51    0.31 
  -9   5   3    0.37    0.17 
  -9   5   3    0.41    0.14 
   8  -5  -3    0.75    0.17 
   8  -5  -3    0.70    0.29 
  -8   5   3    0.71    0.16 
  -8   5   3    0.61    0.17 
   7  -5  -3    0.28    0.24 
   7  -5  -3    0.53    0.15 
  -7   5   3    0.45    0.15 
  -7   5   3    0.52    0.13 
   6  -5  -3    0.22    0.11 
   6  -5  -3    0.29    0.21 
   6  -5  -3    0.01    0.08 
  -6   5   3   -0.01    0.11 
  -6   5   3    0.08    0.08 
   5  -5  -3    2.93    0.32 
   5  -5  -3    2.98    0.17 
   5  -5  -3    2.57    0.23 
  -5   5   3    2.86    0.23 
  -5   5   3    2.70    0.19 
   4  -5  -3   -0.02    0.05 
   4  -5  -3   -0.06    0.13 
   4  -5  -3    0.18    0.11 
  -4   5   3   -0.04    0.06 
  -4   5   3   -0.11    0.07 
   3  -5  -3   -0.01    0.04 
   3  -5  -3   -0.03    0.09 
   3  -5  -3    0.00    0.05 
   3  -5  -3    0.31    0.14 
  -3   5   3    0.04    0.08 
   2  -5  -3    0.71    0.10 
   2  -5  -3    0.78    0.15 
   2  -5  -3    0.72    0.13 
   2  -5  -3    0.85    0.08 
  -2   5   3    0.69    0.11 
   1  -5  -3   13.28    0.44 
   1  -5  -3   13.36    0.39 
   1  -5  -3   12.73    0.44 
  -1   5   3   13.53    0.36 
  -1   5   3   13.25    0.39 
   0  -5  -3    0.71    0.11 
   0  -5  -3    0.58    0.12 
   0  -5  -3    0.62    0.11 
   0   5   3    0.56    0.09 
   0   5   3    0.66    0.09 
  -1  -5  -3    5.01    0.26 
  -1  -5  -3    4.53    0.23 
  -1  -5  -3    4.56    0.23 
   1   5   3    4.62    0.17 
   1   5   3    4.68    0.23 
  -2  -5  -3    1.80    0.19 
  -2  -5  -3    1.30    0.16 
  -2  -5  -3    1.58    0.16 
   2   5   3    1.66    0.09 
   2   5   3    1.61    0.17 
  -3  -5  -3    0.18    0.11 
  -3  -5  -3    0.08    0.09 
  -3  -5  -3    0.12    0.08 
   3   5   3    0.08    0.10 
  -4  -5  -3    1.24    0.19 
  -4  -5  -3    1.21    0.18 
  -4  -5  -3    0.94    0.17 
   4   5   3    0.46    0.15 
  -5  -5  -3    0.04    0.10 
  -5  -5  -3    0.03    0.11 
  -5  -5  -3   -0.02    0.11 
   5   5   3    0.04    0.15 
  -6  -5  -3    0.08    0.12 
  -6  -5  -3   -0.11    0.10 
   6   5   3    0.04    0.16 
   6   5   3    0.31    0.13 
  -7  -5  -3   -0.15    0.13 
  -7  -5  -3   -0.19    0.10 
   7   5   3   -0.07    0.19 
   7   5   3    0.19    0.15 
  -8  -5  -3   -0.15    0.12 
  -8  -5  -3   -0.08    0.13 
   8   5   3   -0.13    0.21 
  -9  -5  -3    0.18    0.17 
  -9  -5  -3    0.27    0.17 
   9   5   3    0.07    0.25 
   9   5   3    1.35    0.25 
  10  -6  -3    0.07    0.31 
 -10   6   3    0.33    0.18 
   9  -6  -3    0.10    0.28 
  -9   6   3    0.11    0.14 
   8  -6  -3    0.24    0.27 
   8  -6  -3    0.30    0.15 
  -8   6   3    0.37    0.13 
  -8   6   3    0.15    0.16 
   7  -6  -3    0.65    0.25 
   7  -6  -3    0.86    0.18 
  -7   6   3    0.59    0.14 
  -7   6   3    0.64    0.17 
   6  -6  -3    1.61    0.28 
   6  -6  -3    1.45    0.20 
  -6   6   3    1.43    0.17 
  -6   6   3    1.29    0.20 
   5  -6  -3    2.62    0.24 
   5  -6  -3    2.75    0.31 
   5  -6  -3    2.62    0.17 
  -5   6   3    2.60    0.19 
  -5   6   3    2.76    0.23 
   4  -6  -3    3.22    0.20 
   4  -6  -3    3.55    0.26 
   4  -6  -3    3.02    0.16 
   4  -6  -3    3.72    0.31 
  -4   6   3    3.03    0.23 
   3  -6  -3    4.09    0.28 
   3  -6  -3    4.47    0.19 
   3  -6  -3    4.54    0.32 
   3  -6  -3    4.25    0.22 
  -3   6   3    4.47    0.25 
   2  -6  -3    9.93    0.33 
   2  -6  -3    9.66    0.30 
   2  -6  -3   10.12    0.41 
   2  -6  -3    9.70    0.38 
  -2   6   3    9.63    0.36 
   1  -6  -3    0.38    0.12 
   1  -6  -3    0.31    0.09 
   1  -6  -3    0.43    0.13 
  -1   6   3    0.18    0.07 
  -1   6   3    0.45    0.08 
   0  -6  -3    3.69    0.24 
   0  -6  -3    3.82    0.21 
   0  -6  -3    3.66    0.23 
   0   6   3    3.33    0.17 
   0   6   3    3.75    0.20 
  -1  -6  -3    2.73    0.20 
  -1  -6  -3    2.55    0.19 
  -1  -6  -3    3.20    0.23 
   1   6   3    2.60    0.14 
   1   6   3    2.69    0.19 
  -2  -6  -3    3.17    0.23 
  -2  -6  -3    2.70    0.21 
  -2  -6  -3    3.13    0.23 
   2   6   3    2.41    0.22 
   2   6   3    2.84    0.12 
  -3  -6  -3    0.23    0.12 
  -3  -6  -3    0.45    0.12 
  -3  -6  -3    0.60    0.13 
   3   6   3    0.43    0.15 
  -4  -6  -3    0.08    0.11 
  -4  -6  -3    0.04    0.11 
  -4  -6  -3    0.22    0.10 
   4   6   3    0.12    0.13 
  -5  -6  -3   -0.07    0.09 
  -5  -6  -3    0.15    0.12 
  -5  -6  -3   -0.01    0.10 
   5   6   3   -0.08    0.14 
  -6  -6  -3    0.00    0.12 
  -6  -6  -3    0.08    0.13 
   6   6   3    0.17    0.17 
   6   6   3   -0.05    0.10 
  -7  -6  -3    0.37    0.16 
  -7  -6  -3    0.09    0.12 
   7   6   3    0.44    0.18 
   7   6   3    0.19    0.22 
  -8  -6  -3    0.27    0.16 
  -8  -6  -3    0.03    0.16 
   8   6   3    0.27    0.22 
  10  -7  -3   -0.09    0.31 
 -10   7   3    0.06    0.15 
   9  -7  -3   -0.27    0.24 
  -9   7   3   -0.07    0.14 
   8  -7  -3    0.58    0.18 
   8  -7  -3    0.20    0.25 
  -8   7   3    0.43    0.19 
   7  -7  -3    0.50    0.16 
   7  -7  -3   -0.03    0.22 
  -7   7   3   -0.05    0.09 
  -7   7   3    0.31    0.16 
   6  -7  -3   -0.27    0.18 
   6  -7  -3   -0.07    0.12 
  -6   7   3   -0.13    0.10 
  -6   7   3   -0.11    0.08 
   5  -7  -3    0.25    0.18 
   5  -7  -3    0.12    0.14 
   5  -7  -3    0.01    0.07 
  -5   7   3   -0.02    0.11 
   4  -7  -3    0.55    0.20 
   4  -7  -3    0.68    0.11 
   4  -7  -3    0.61    0.16 
   4  -7  -3    0.79    0.10 
  -4   7   3    0.77    0.14 
   3  -7  -3    0.12    0.08 
   3  -7  -3    0.14    0.13 
   3  -7  -3    0.17    0.07 
   3  -7  -3    0.13    0.15 
  -3   7   3    0.07    0.09 
   2  -7  -3    2.30    0.15 
   2  -7  -3    2.38    0.26 
   2  -7  -3    2.09    0.22 
   2  -7  -3    2.50    0.19 
  -2   7   3    1.72    0.18 
   1  -7  -3   -0.04    0.08 
   1  -7  -3    0.00    0.09 
   1  -7  -3    0.03    0.12 
  -1   7   3    0.06    0.07 
  -1   7   3    0.05    0.07 
   0  -7  -3    0.01    0.09 
   0  -7  -3    0.07    0.12 
   0  -7  -3    0.13    0.10 
   0   7   3    0.12    0.08 
   0   7   3    0.06    0.06 
  -1  -7  -3   -0.02    0.10 
  -1  -7  -3    0.04    0.09 
  -1  -7  -3    0.00    0.09 
   1   7   3   -0.02    0.09 
   1   7   3    0.14    0.06 
  -2  -7  -3    2.26    0.20 
  -2  -7  -3    1.87    0.22 
  -2  -7  -3    2.23    0.21 
   2   7   3    1.50    0.19 
  -3  -7  -3    0.14    0.12 
  -3  -7  -3    0.06    0.12 
  -3  -7  -3    0.04    0.09 
   3   7   3    0.14    0.12 
  -4  -7  -3    5.03    0.34 
  -4  -7  -3    5.22    0.33 
  -4  -7  -3    5.22    0.33 
   4   7   3    5.05    0.34 
  -5  -7  -3   -0.05    0.12 
  -5  -7  -3   -0.08    0.10 
  -5  -7  -3   -0.01    0.10 
   5   7   3    0.26    0.17 
  -6  -7  -3    0.53    0.18 
  -6  -7  -3    0.08    0.13 
   6   7   3    0.35    0.21 
   6   7   3    0.37    0.16 
  -7  -7  -3    0.46    0.20 
  -7  -7  -3    0.21    0.17 
   7   7   3    0.53    0.26 
   7   7   3    0.32    0.15 
  -8  -7  -3    1.43    0.27 
  -8  -7  -3    1.50    0.29 
   8   7   3    2.37    0.37 
   8   7   3    1.25    0.32 
   9  -8  -3    0.27    0.30 
  -9   8   3    0.28    0.18 
   8  -8  -3   -0.02    0.25 
  -8   8   3   -0.04    0.15 
   7  -8  -3    0.15    0.21 
   7  -8  -3    0.02    0.15 
  -7   8   3    0.05    0.15 
   6  -8  -3    1.41    0.23 
   6  -8  -3    1.38    0.19 
   6  -8  -3    1.15    0.28 
  -6   8   3    1.52    0.24 
   5  -8  -3    0.43    0.18 
   5  -8  -3    0.20    0.19 
   5  -8  -3    0.24    0.09 
  -5   8   3    0.28    0.14 
   4  -8  -3    1.03    0.14 
   4  -8  -3    0.99    0.20 
   4  -8  -3    0.92    0.22 
   4  -8  -3    1.32    0.13 
  -4   8   3    0.86    0.17 
   3  -8  -3   12.03    0.41 
   3  -8  -3   12.92    0.51 
   3  -8  -3   11.82    0.54 
   3  -8  -3   11.96    0.38 
  -3   8   3   11.30    0.45 
   2  -8  -3    1.64    0.24 
   2  -8  -3    2.04    0.16 
   2  -8  -3    1.98    0.22 
   2  -8  -3    1.85    0.17 
  -2   8   3    2.04    0.18 
   1  -8  -3    1.32    0.16 
   1  -8  -3    1.60    0.21 
   1  -8  -3    1.25    0.19 
  -1   8   3    1.50    0.16 
  -1   8   3    1.21    0.14 
   0  -8  -3    0.50    0.15 
   0  -8  -3    0.66    0.13 
   0  -8  -3    0.72    0.16 
   0   8   3    0.48    0.11 
   0   8   3    0.48    0.10 
  -1  -8  -3    5.23    0.34 
  -1  -8  -3    5.24    0.32 
  -1  -8  -3    4.77    0.28 
   1   8   3    5.02    0.21 
   1   8   3    5.37    0.30 
  -2  -8  -3    1.19    0.17 
  -2  -8  -3    0.74    0.16 
  -2  -8  -3    0.94    0.18 
   2   8   3    0.83    0.16 
  -3  -8  -3    4.87    0.32 
  -3  -8  -3    5.07    0.34 
  -3  -8  -3    4.78    0.31 
   3   8   3    5.10    0.34 
  -4  -8  -3    0.46    0.15 
  -4  -8  -3    0.10    0.13 
  -4  -8  -3    0.63    0.18 
   4   8   3    0.60    0.18 
  -5  -8  -3    0.92    0.21 
  -5  -8  -3    0.83    0.20 
  -5  -8  -3    1.13    0.22 
   5   8   3    1.09    0.25 
  -6  -8  -3    0.16    0.17 
  -6  -8  -3    0.19    0.16 
   6   8   3    0.29    0.18 
   6   8   3    0.16    0.15 
  -7  -8  -3    0.68    0.20 
  -7  -8  -3    0.24    0.19 
   7   8   3    1.11    0.21 
   7   8   3    0.68    0.28 
   9  -9  -3   -0.04    0.28 
  -9   9   3   -0.10    0.16 
   8  -9  -3   -0.22    0.24 
  -8   9   3   -0.23    0.15 
   7  -9  -3    1.02    0.24 
   7  -9  -3    0.79    0.29 
  -7   9   3    0.90    0.23 
   6  -9  -3   -0.01    0.21 
   6  -9  -3   -0.03    0.16 
  -6   9   3    0.14    0.13 
   5  -9  -3    0.49    0.21 
   5  -9  -3    0.52    0.18 
  -5   9   3    0.37    0.16 
   4  -9  -3   -0.09    0.13 
   4  -9  -3    0.11    0.16 
   4  -9  -3    0.11    0.10 
  -4   9   3   -0.11    0.09 
   3  -9  -3    3.61    0.31 
   3  -9  -3    3.69    0.21 
   3  -9  -3    3.36    0.31 
   3  -9  -3    4.23    0.25 
  -3   9   3    4.49    0.29 
   2  -9  -3    1.38    0.23 
   2  -9  -3    1.32    0.22 
   2  -9  -3    1.40    0.16 
  -2   9   3    0.95    0.15 
  -2   9   3    1.61    0.17 
   1  -9  -3    1.22    0.16 
   1  -9  -3    1.16    0.21 
   1  -9  -3    1.20    0.21 
  -1   9   3    1.49    0.16 
  -1   9   3    1.28    0.16 
   0  -9  -3    0.43    0.15 
   0  -9  -3    0.15    0.11 
   0  -9  -3    0.39    0.16 
   0   9   3    0.15    0.08 
   0   9   3    0.45    0.12 
  -1  -9  -3    0.27    0.12 
  -1  -9  -3    0.04    0.12 
  -1  -9  -3    0.04    0.11 
   1   9   3    0.12    0.10 
  -2  -9  -3    0.04    0.11 
  -2  -9  -3    0.09    0.10 
  -2  -9  -3    0.13    0.14 
   2   9   3   -0.02    0.11 
  -3  -9  -3    1.06    0.19 
  -3  -9  -3    0.96    0.20 
  -3  -9  -3    1.11    0.21 
   3   9   3    1.49    0.23 
  -4  -9  -3    0.80    0.19 
  -4  -9  -3    0.87    0.18 
  -4  -9  -3    0.94    0.20 
   4   9   3    0.73    0.19 
  -5  -9  -3    0.10    0.12 
  -5  -9  -3   -0.11    0.13 
  -5  -9  -3   -0.10    0.13 
   5   9   3    0.13    0.16 
  -6  -9  -3    0.54    0.19 
  -6  -9  -3    0.76    0.22 
   6   9   3    0.62    0.25 
   6   9   3    0.51    0.19 
  -7  -9  -3   -0.25    0.14 
  -7  -9  -3   -0.19    0.14 
   7   9   3    0.03    0.23 
   9 -10  -3   -0.04    0.26 
  -9  10   3    0.07    0.18 
   8 -10  -3    0.68    0.32 
  -8  10   3    0.64    0.22 
   7 -10  -3   -0.28    0.18 
  -7  10   3   -0.17    0.12 
   6 -10  -3    0.26    0.24 
   6 -10  -3    0.33    0.21 
  -6  10   3    0.47    0.19 
   5 -10  -3    0.24    0.19 
   5 -10  -3    0.26    0.19 
  -5  10   3    0.53    0.17 
   4 -10  -3    3.44    0.34 
   4 -10  -3    2.90    0.35 
  -4  10   3    3.20    0.30 
   3 -10  -3    2.14    0.30 
   3 -10  -3    2.11    0.27 
  -3  10   3    1.79    0.22 
   2 -10  -3    0.30    0.14 
   2 -10  -3    0.63    0.13 
   2 -10  -3    0.27    0.16 
  -2  10   3    0.61    0.13 
  -2  10   3    0.76    0.15 
   1 -10  -3    0.08    0.13 
   1 -10  -3   -0.08    0.11 
   1 -10  -3   -0.01    0.10 
  -1  10   3    0.08    0.09 
  -1  10   3   -0.07    0.07 
   0 -10  -3    0.16    0.11 
   0 -10  -3    0.25    0.15 
   0 -10  -3    0.22    0.14 
   0  10   3    0.26    0.09 
   0  10   3    0.28    0.12 
  -1 -10  -3    0.08    0.11 
  -1 -10  -3    0.02    0.14 
  -1 -10  -3    0.15    0.11 
   1  10   3    0.36    0.13 
  -2 -10  -3    1.44    0.24 
  -2 -10  -3    1.57    0.24 
  -2 -10  -3    1.69    0.21 
   2  10   3    1.74    0.24 
  -3 -10  -3    1.65    0.25 
  -3 -10  -3    1.30    0.25 
  -3 -10  -3    1.74    0.24 
   3  10   3    1.73    0.26 
  -4 -10  -3    0.12    0.11 
  -4 -10  -3   -0.18    0.11 
  -4 -10  -3    0.08    0.14 
   4  10   3    0.21    0.17 
  -5 -10  -3   -0.02    0.13 
  -5 -10  -3   -0.02    0.14 
  -5 -10  -3   -0.01    0.11 
   5  10   3    0.08    0.18 
  -6 -10  -3    0.00    0.16 
  -6 -10  -3    0.08    0.16 
   6  10   3    0.18    0.19 
   8 -11  -3   -0.02    0.26 
  -8  11   3    0.20    0.17 
   7 -11  -3    1.63    0.37 
  -7  11   3    1.31    0.25 
   6 -11  -3    0.62    0.25 
  -6  11   3    0.59    0.19 
   5 -11  -3   -0.06    0.17 
   5 -11  -3    0.25    0.22 
  -5  11   3   -0.17    0.13 
   4 -11  -3    5.50    0.41 
   4 -11  -3    5.68    0.44 
  -4  11   3    6.04    0.39 
   3 -11  -3    0.94    0.22 
   3 -11  -3    0.64    0.21 
  -3  11   3    0.53    0.15 
   2 -11  -3    0.06    0.15 
   2 -11  -3    0.18    0.14 
  -2  11   3    0.17    0.11 
   1 -11  -3    0.44    0.17 
   1 -11  -3    0.25    0.16 
  -1  11   3    0.39    0.11 
  -1  11   3    0.28    0.12 
   0 -11  -3    2.44    0.31 
   0 -11  -3    2.51    0.30 
   0 -11  -3    2.70    0.25 
   0  11   3    2.62    0.25 
  -1 -11  -3    0.05    0.11 
  -1 -11  -3    0.03    0.15 
  -1 -11  -3   -0.01    0.11 
   1  11   3    0.05    0.11 
  -2 -11  -3    0.38    0.18 
  -2 -11  -3    0.23    0.13 
  -2 -11  -3    0.18    0.14 
   2  11   3    0.24    0.15 
  -3 -11  -3    1.09    0.20 
  -3 -11  -3    1.45    0.28 
  -3 -11  -3    0.84    0.20 
   3  11   3    1.34    0.24 
  -4 -11  -3    0.28    0.20 
  -4 -11  -3    0.52    0.18 
  -4 -11  -3    0.54    0.18 
   4  11   3    0.86    0.23 
  -5 -11  -3    0.02    0.10 
  -5 -11  -3    0.02    0.14 
  -5 -11  -3   -0.09    0.13 
   5  11   3    0.39    0.20 
  -6 -11  -3    0.08    0.16 
   6  11   3    0.26    0.27 
   7 -12  -3   -0.18    0.23 
  -7  12   3    0.00    0.16 
   6 -12  -3   -0.09    0.19 
  -6  12   3   -0.12    0.14 
   5 -12  -3    0.13    0.21 
   5 -12  -3   -0.02    0.20 
  -5  12   3    0.37    0.17 
   4 -12  -3    1.25    0.28 
   4 -12  -3    1.64    0.28 
  -4  12   3    1.72    0.26 
   3 -12  -3    1.00    0.25 
   3 -12  -3    1.06    0.23 
  -3  12   3    0.61    0.16 
   2 -12  -3    0.47    0.18 
   2 -12  -3    0.20    0.18 
  -2  12   3    0.36    0.13 
   1 -12  -3    0.03    0.15 
   1 -12  -3    0.46    0.19 
  -1  12   3    0.46    0.16 
   0 -12  -3   -0.08    0.11 
   0 -12  -3   -0.15    0.14 
   0  12   3    0.08    0.11 
  -1 -12  -3    0.02    0.13 
  -1 -12  -3    0.08    0.16 
   1  12   3    0.14    0.13 
  -2 -12  -3    0.00    0.16 
  -2 -12  -3    0.11    0.15 
   2  12   3    0.27    0.15 
  -3 -12  -3    0.33    0.18 
  -3 -12  -3    0.72    0.19 
  -3 -12  -3    0.24    0.15 
   3  12   3    0.43    0.18 
  -4 -12  -3    0.13    0.13 
  -4 -12  -3   -0.08    0.13 
  -4 -12  -3    0.02    0.17 
   4  12   3    0.19    0.17 
  -5 -12  -3   -0.23    0.13 
  -5 -12  -3   -0.23    0.24 
   5  12   3    0.42    0.21 
   7 -13  -3   -0.14    0.22 
  -7  13   3    0.11    0.17 
   6 -13  -3   -0.03    0.21 
  -6  13   3    0.01    0.15 
   5 -13  -3    0.84    0.27 
  -5  13   3    0.97    0.24 
   4 -13  -3    1.10    0.26 
   4 -13  -3    1.50    0.32 
  -4  13   3    1.16    0.22 
   3 -13  -3    0.09    0.17 
   3 -13  -3   -0.23    0.16 
  -3  13   3    0.04    0.12 
   2 -13  -3    0.63    0.23 
   2 -13  -3    0.60    0.22 
  -2  13   3    0.80    0.17 
   1 -13  -3    1.35    0.29 
   1 -13  -3    0.51    0.21 
   0 -13  -3    1.41    0.27 
   0 -13  -3    1.20    0.26 
  -1 -13  -3    0.60    0.22 
  -1 -13  -3    0.48    0.18 
   1  13   3    1.04    0.20 
  -2 -13  -3    1.61    0.31 
  -2 -13  -3    1.91    0.32 
   2  13   3    1.54    0.26 
  -3 -13  -3   -0.10    0.11 
  -3 -13  -3   -0.02    0.16 
   3  13   3    0.19    0.14 
  -4 -13  -3   -0.27    0.28 
   4  13   3    0.09    0.17 
   6 -14  -3    0.24    0.29 
  -6  14   3    0.24    0.19 
   5 -14  -3    3.18    0.45 
  -5  14   3    2.81    0.35 
   4 -14  -3    0.51    0.24 
  -4  14   3    0.45    0.18 
   3 -14  -3    0.01    0.15 
   3 -14  -3   -0.23    0.16 
  -3  14   3    0.16    0.13 
   2 -14  -3    0.20    0.18 
   2 -14  -3   -0.12    0.17 
   1 -14  -3    0.23    0.18 
   1 -14  -3    0.43    0.21 
   0 -14  -3    0.32    0.19 
   0 -14  -3    0.14    0.19 
  -1 -14  -3   -0.22    0.15 
  -1 -14  -3    0.01    0.15 
  -2 -14  -3    0.45    0.23 
  -2 -14  -3    0.68    0.22 
   4 -15  -3   -0.12    0.18 
  -4  15   3   -0.05    0.15 
   3 -15  -3    0.05    0.18 
   2 -15  -3   -0.04    0.17 
   2 -15  -3   -0.27    0.16 
   1 -15  -3    0.23    0.20 
   1 -15  -3    0.48    0.23 
   0 -15  -3    0.60    0.24 
   0 -15  -3    0.54    0.25 
   1  16  -4    2.64    0.36 
  -1 -16   4    2.32    0.39 
   0  16  -4    1.53    0.27 
   0 -16   4    1.61    0.35 
  -1  16  -4    0.28    0.16 
   1 -16   4   -0.07    0.17 
  -2  16  -4    0.38    0.18 
   2 -16   4    0.25    0.23 
   3 -16   4    1.68    0.36 
  -4  16  -4    2.24    0.31 
   4 -16   4    2.70    0.43 
  -5  16  -4   -0.13    0.17 
   3  15  -4    0.18    0.16 
  -3 -15   4    0.09    0.16 
  -3 -15   4   -0.01    0.16 
   2  15  -4    1.03    0.24 
  -2 -15   4    0.70    0.25 
  -2 -15   4    0.85    0.23 
   1  15  -4    2.41    0.35 
  -1 -15   4    1.31    0.29 
  -1 -15   4    1.73    0.28 
   0  15  -4    4.22    0.37 
   0 -15   4    4.13    0.42 
  -1  15  -4    0.42    0.18 
   1 -15   4   -0.03    0.17 
   2 -15   4    0.28    0.21 
   2 -15   4    0.08    0.12 
  -3  15  -4    0.38    0.17 
   3 -15   4    0.57    0.19 
   3 -15   4    0.30    0.20 
  -4  15  -4   -0.16    0.15 
   4 -15   4   -0.03    0.18 
  -5  15  -4   -0.30    0.15 
   5 -15   4   -0.22    0.19 
  -6  15  -4   -0.53    0.14 
   6 -15   4    0.12    0.22 
   4  14  -4    0.31    0.16 
  -4 -14   4   -0.02    0.16 
  -4 -14   4    0.18    0.17 
   3  14  -4    0.42    0.18 
  -3 -14   4    0.15    0.16 
  -3 -14   4    0.12    0.14 
   2  14  -4    0.25    0.17 
  -2 -14   4    0.02    0.15 
  -2 -14   4    0.03    0.15 
   1  14  -4    0.23    0.15 
  -1 -14   4    0.18    0.16 
  -1 -14   4    0.50    0.20 
   0  14  -4    0.05    0.13 
   0 -14   4    0.06    0.17 
   0 -14   4   -0.13    0.11 
  -1  14  -4    1.40    0.24 
   1 -14   4    1.74    0.31 
  -2  14  -4    0.93    0.19 
   2 -14   4    0.95    0.20 
   2 -14   4    0.98    0.25 
  -3  14  -4    0.00    0.14 
   3 -14   4    0.09    0.12 
   3 -14   4   -0.04    0.16 
  -4  14  -4    0.42    0.18 
   4 -14   4    0.44    0.16 
   4 -14   4    0.43    0.24 
  -5  14  -4    0.18    0.18 
   5 -14   4   -0.16    0.17 
  -6  14  -4    0.37    0.19 
   6 -14   4    0.53    0.25 
  -7  14  -4   -0.17    0.17 
   7 -14   4    0.06    0.25 
   5  13  -4    0.12    0.17 
  -5 -13   4    0.02    0.15 
  -5 -13   4   -0.02    0.15 
   4  13  -4    0.04    0.16 
  -4 -13   4    0.08    0.16 
  -4 -13   4   -0.07    0.14 
   3  13  -4    0.25    0.16 
  -3 -13   4    0.06    0.16 
  -3 -13   4   -0.03    0.12 
   2  13  -4    2.97    0.34 
  -2 -13   4    3.07    0.40 
  -2 -13   4    2.99    0.33 
   1  13  -4    2.07    0.28 
  -1 -13   4    1.97    0.33 
  -1 -13   4    1.83    0.25 
   0  13  -4    0.55    0.17 
   0 -13   4    0.10    0.14 
   0 -13   4    0.18    0.14 
  -1  13  -4    2.49    0.24 
   1 -13   4    2.51    0.34 
   1 -13   4    1.99    0.24 
   1 -13   4    2.49    0.30 
  -2  13  -4    4.54    0.31 
   2 -13   4    4.61    0.34 
   2 -13   4    3.92    0.38 
  -3  13  -4    1.15    0.21 
   3 -13   4    1.01    0.25 
   3 -13   4    1.00    0.19 
  -4  13  -4   -0.10    0.12 
   4 -13   4    0.07    0.11 
   4 -13   4    0.23    0.19 
  -5  13  -4    0.02    0.16 
   5 -13   4    0.09    0.13 
   5 -13   4    0.36    0.23 
  -6  13  -4    0.06    0.18 
   6 -13   4   -0.19    0.19 
  -7  13  -4   -0.07    0.17 
   7 -13   4   -0.19    0.18 
  -8  13  -4    0.85    0.33 
   8 -13   4    0.71    0.33 
   6  12  -4    0.66    0.24 
  -6 -12   4    0.13    0.18 
  -6 -12   4    0.07    0.15 
  -6 -12   4    0.11    0.17 
   5  12  -4    0.21    0.17 
  -5 -12   4    0.14    0.17 
  -5 -12   4    0.02    0.15 
  -5 -12   4    0.23    0.16 
   4  12  -4    0.47    0.20 
  -4 -12   4    0.54    0.20 
  -4 -12   4    0.68    0.20 
   3  12  -4    0.57    0.19 
  -3 -12   4    0.10    0.15 
  -3 -12   4    0.15    0.16 
   2  12  -4    2.27    0.30 
  -2 -12   4    1.90    0.29 
  -2 -12   4    1.84    0.25 
   1  12  -4    1.12    0.21 
  -1 -12   4    0.64    0.17 
  -1 -12   4    0.89    0.23 
   0 -12   4    1.63    0.23 
   0 -12   4    1.16    0.23 
   0 -12   4    0.94    0.17 
  -1  12  -4    0.01    0.10 
   1 -12   4   -0.02    0.09 
   1 -12   4   -0.05    0.09 
   1 -12   4    0.01    0.13 
  -2  12  -4    0.33    0.13 
   2 -12   4    0.55    0.14 
   2 -12   4    0.47    0.14 
   2 -12   4    0.40    0.19 
  -3  12  -4    0.18    0.14 
   3 -12   4   -0.04    0.13 
   3 -12   4    0.17    0.12 
  -4  12  -4    0.29    0.16 
   4 -12   4    0.26    0.18 
   4 -12   4    0.22    0.13 
  -5  12  -4    0.75    0.21 
   5 -12   4    0.58    0.24 
   5 -12   4    0.62    0.16 
  -6  12  -4   -0.04    0.14 
   6 -12   4   -0.04    0.11 
   6 -12   4   -0.12    0.19 
  -7  12  -4    0.87    0.24 
   7 -12   4    0.77    0.29 
  -8  12  -4    0.14    0.21 
   8 -12   4   -0.10    0.23 
   7  11  -4    0.41    0.24 
   7  11  -4    1.06    0.24 
  -7 -11   4    0.68    0.25 
  -7 -11   4    0.51    0.19 
   6  11  -4    0.69    0.22 
  -6 -11   4    0.42    0.20 
  -6 -11   4    0.47    0.20 
  -6 -11   4    0.78    0.20 
   5  11  -4    0.55    0.20 
  -5 -11   4    0.31    0.19 
  -5 -11   4    0.29    0.15 
  -5 -11   4    0.45    0.18 
   4  11  -4    1.66    0.27 
  -4 -11   4    1.06    0.22 
  -4 -11   4    1.06    0.23 
  -4 -11   4    1.23    0.20 
   3  11  -4    0.12    0.14 
  -3 -11   4    0.15    0.10 
  -3 -11   4   -0.11    0.11 
  -3 -11   4   -0.07    0.12 
   2  11  -4    0.06    0.13 
  -2 -11   4    0.26    0.15 
  -2 -11   4    0.11    0.13 
  -2 -11   4    0.25    0.16 
   1  11  -4    0.21    0.12 
  -1 -11   4    0.17    0.14 
  -1 -11   4    0.15    0.11 
   0  11  -4    0.00    0.08 
   0 -11   4    0.12    0.13 
   0 -11   4   -0.04    0.09 
   0 -11   4    0.00    0.10 
  -1  11  -4    3.31    0.23 
   1 -11   4    3.48    0.25 
   1 -11   4    3.21    0.33 
   1 -11   4    3.69    0.28 
  -2  11  -4    0.06    0.11 
   2 -11   4    0.12    0.10 
   2 -11   4    0.03    0.09 
   2 -11   4    0.19    0.15 
  -3  11  -4    0.05    0.11 
   3 -11   4    0.46    0.18 
   3 -11   4    0.36    0.12 
  -4  11  -4    1.09    0.20 
   4 -11   4    0.66    0.20 
   4 -11   4    0.76    0.16 
  -5  11  -4    1.25    0.23 
   5 -11   4    1.43    0.21 
   5 -11   4    1.28    0.28 
  -6  11  -4    0.22    0.16 
   6 -11   4    0.01    0.10 
   6 -11   4    0.35    0.20 
  -7  11  -4    0.08    0.17 
   7 -11   4    0.03    0.12 
   7 -11   4   -0.30    0.21 
  -8  11  -4    3.18    0.39 
   8 -11   4    3.83    0.49 
  -9  11  -4    3.36    0.41 
   9 -11   4    3.01    0.49 
   7  10  -4    0.07    0.17 
   7  10  -4    0.36    0.21 
  -7 -10   4    0.24    0.16 
  -7 -10   4    0.46    0.22 
   6  10  -4    1.22    0.27 
  -6 -10   4    1.24    0.22 
  -6 -10   4    0.66    0.19 
  -6 -10   4    0.87    0.23 
   5  10  -4    0.06    0.14 
  -5 -10   4   -0.10    0.12 
  -5 -10   4    0.10    0.12 
  -5 -10   4   -0.01    0.11 
   4  10  -4    1.14    0.22 
  -4 -10   4    0.78    0.16 
  -4 -10   4    0.76    0.21 
  -4 -10   4    0.85    0.18 
   3  10  -4    4.91    0.36 
  -3 -10   4    4.54    0.27 
  -3 -10   4    4.52    0.33 
  -3 -10   4    4.04    0.35 
   2  10  -4    0.72    0.17 
  -2 -10   4    0.72    0.12 
  -2 -10   4    0.68    0.18 
  -2 -10   4    0.53    0.13 
   1  10  -4    0.82    0.12 
   1  10  -4    0.40    0.13 
  -1 -10   4    0.82    0.11 
  -1 -10   4    0.69    0.15 
  -1 -10   4    0.70    0.18 
   0  10  -4    1.77    0.17 
   0 -10   4    1.71    0.19 
   0 -10   4    1.91    0.25 
   0 -10   4    1.70    0.21 
  -1  10  -4    4.29    0.26 
   1 -10   4    4.49    0.34 
   1 -10   4    4.47    0.29 
   1 -10   4    3.91    0.24 
  -2  10  -4    3.02    0.24 
   2 -10   4    3.27    0.21 
   2 -10   4    3.17    0.29 
   2 -10   4    3.00    0.24 
  -3  10  -4    0.80    0.17 
   3 -10   4    0.61    0.12 
   3 -10   4    0.85    0.20 
   3 -10   4    0.67    0.14 
  -4  10  -4    0.23    0.15 
   4 -10   4    0.61    0.14 
   4 -10   4    0.60    0.20 
  -5  10  -4    0.24    0.16 
   5 -10   4    0.25    0.18 
   5 -10   4    0.13    0.11 
  -6  10  -4    0.52    0.19 
   6 -10   4    0.40    0.23 
   6 -10   4    0.41    0.14 
  -7  10  -4    0.74    0.23 
   7 -10   4    1.08    0.20 
   7 -10   4    1.02    0.27 
  -8  10  -4    1.91    0.30 
   8 -10   4    1.48    0.33 
   8 -10   4    1.27    0.23 
  -9  10  -4    0.01    0.19 
   9 -10   4   -0.03    0.28 
   8   9  -4   -0.13    0.19 
   8   9  -4    0.67    0.21 
  -8  -9   4    0.48    0.21 
  -8  -9   4    0.36    0.18 
   7   9  -4    4.08    0.45 
   7   9  -4    2.63    0.38 
  -7  -9   4    3.13    0.35 
  -7  -9   4    2.79    0.36 
   6   9  -4    0.25    0.18 
  -6  -9   4    0.03    0.13 
  -6  -9   4    0.11    0.14 
  -6  -9   4    0.07    0.14 
   5   9  -4    0.17    0.14 
  -5  -9   4    0.56    0.19 
  -5  -9   4    0.38    0.14 
  -5  -9   4    0.27    0.16 
   4   9  -4    1.29    0.21 
  -4  -9   4    1.25    0.22 
  -4  -9   4    0.92    0.19 
  -4  -9   4    1.26    0.19 
   3   9  -4    4.20    0.32 
  -3  -9   4    4.42    0.33 
  -3  -9   4    3.97    0.30 
  -3  -9   4    3.91    0.26 
   2   9  -4    0.50    0.15 
  -2  -9   4    0.20    0.10 
  -2  -9   4    0.40    0.14 
  -2  -9   4    0.39    0.10 
   1   9  -4    0.24    0.08 
  -1  -9   4    0.18    0.10 
  -1  -9   4    0.23    0.10 
  -1  -9   4    0.12    0.12 
  -1  -9   4    0.29    0.07 
   0   9  -4    2.36    0.18 
   0  -9   4    1.92    0.19 
   0  -9   4    1.60    0.19 
   0  -9   4    2.20    0.12 
   0  -9   4    2.21    0.23 
  -1   9  -4    0.15    0.10 
   1  -9   4    0.17    0.11 
   1  -9   4   -0.07    0.07 
   1  -9   4   -0.09    0.08 
  -2   9  -4    0.14    0.11 
   2  -9   4    0.18    0.08 
   2  -9   4   -0.02    0.09 
   2  -9   4    0.15    0.12 
  -3   9  -4    0.38    0.13 
   3  -9   4    0.17    0.10 
   3  -9   4   -0.01    0.08 
   3  -9   4    0.26    0.14 
  -4   9  -4    0.23    0.13 
   4  -9   4    0.38    0.16 
   4  -9   4   -0.04    0.08 
  -5   9  -4    0.01    0.12 
   5  -9   4    0.33    0.12 
   5  -9   4    0.38    0.20 
  -6   9  -4    0.30    0.15 
   6  -9   4    0.20    0.12 
   6  -9   4   -0.11    0.18 
  -7   9  -4    0.13    0.16 
   7  -9   4   -0.09    0.10 
   7  -9   4   -0.30    0.21 
  -8   9  -4    0.85    0.23 
   8  -9   4    0.73    0.20 
   8  -9   4    1.12    0.33 
  -9   9  -4    0.03    0.18 
   9  -9   4    0.10    0.28 
   8   8  -4    0.53    0.21 
   8   8  -4    0.46    0.23 
  -8  -8   4    0.37    0.19 
  -8  -8   4    0.34    0.18 
   7   8  -4   -0.02    0.16 
   7   8  -4    0.17    0.19 
  -7  -8   4   -0.11    0.12 
  -7  -8   4    0.00    0.13 
   6   8  -4    0.40    0.17 
  -6  -8   4    0.42    0.17 
  -6  -8   4    0.08    0.13 
  -6  -8   4   -0.06    0.12 
   5   8  -4    0.82    0.18 
  -5  -8   4    0.87    0.18 
  -5  -8   4    0.89    0.19 
  -5  -8   4    0.84    0.20 
   4   8  -4    1.51    0.22 
  -4  -8   4    1.42    0.18 
  -4  -8   4    1.58    0.25 
  -4  -8   4    1.60    0.22 
   3   8  -4    0.08    0.11 
  -3  -8   4    0.00    0.08 
  -3  -8   4   -0.08    0.09 
  -3  -8   4   -0.05    0.08 
   2   8  -4    1.95    0.22 
   2   8  -4    2.09    0.11 
  -2  -8   4    1.59    0.18 
  -2  -8   4    1.81    0.15 
  -2  -8   4    2.29    0.24 
   1   8  -4    0.30    0.08 
  -1  -8   4    0.30    0.11 
  -1  -8   4    0.35    0.10 
  -1  -8   4    0.49    0.08 
  -1  -8   4    0.29    0.12 
   0   8  -4    4.09    0.21 
   0  -8   4    4.38    0.16 
   0  -8   4    4.79    0.29 
   0  -8   4    4.37    0.23 
   0  -8   4    4.38    0.25 
  -1   8  -4    0.55    0.11 
   1  -8   4    0.53    0.11 
   1  -8   4    0.33    0.12 
   1  -8   4    0.53    0.10 
  -2   8  -4    0.13    0.10 
   2  -8   4    0.29    0.14 
   2  -8   4    0.15    0.07 
   2  -8   4    0.17    0.09 
  -3   8  -4    1.18    0.17 
   3  -8   4    1.42    0.13 
   3  -8   4    1.37    0.16 
   3  -8   4    1.32    0.20 
  -4   8  -4    0.55    0.15 
   4  -8   4    0.84    0.12 
   4  -8   4    1.00    0.20 
   4  -8   4    1.07    0.16 
  -5   8  -4    1.88    0.22 
   5  -8   4    1.77    0.20 
   5  -8   4    2.22    0.29 
  -6   8  -4   -0.05    0.12 
   6  -8   4    0.26    0.21 
   6  -8   4    0.14    0.12 
  -7   8  -4    4.72    0.36 
   7  -8   4    4.34    0.32 
   7  -8   4    3.82    0.40 
  -8   8  -4    3.83    0.37 
   8  -8   4    4.93    0.37 
   8  -8   4    4.92    0.50 
  -9   8  -4   -0.08    0.16 
   9  -8   4    0.18    0.30 
   9  -8   4   -0.11    0.12 
 -10   8  -4    0.93    0.24 
  10  -8   4    0.50    0.34 
   9   7  -4    1.20    0.27 
   9   7  -4    0.48    0.25 
  -9  -7   4    0.38    0.20 
  -9  -7   4    0.12    0.15 
   8   7  -4    0.10    0.20 
   8   7  -4    0.17    0.18 
  -8  -7   4   -0.03    0.14 
  -8  -7   4   -0.01    0.14 
   7   7  -4    1.30    0.26 
   7   7  -4    1.07    0.23 
  -7  -7   4    1.01    0.24 
  -7  -7   4    0.85    0.20 
   6   7  -4    0.69    0.19 
   6   7  -4    0.43    0.18 
  -6  -7   4    0.28    0.15 
  -6  -7   4    0.25    0.14 
   5   7  -4    0.12    0.12 
  -5  -7   4    0.20    0.12 
  -5  -7   4   -0.01    0.09 
  -5  -7   4    0.05    0.11 
   4   7  -4    5.32    0.32 
  -4  -7   4    6.09    0.37 
  -4  -7   4    5.95    0.31 
  -4  -7   4    5.87    0.35 
   3   7  -4    0.52    0.13 
  -3  -7   4    0.67    0.13 
  -3  -7   4    0.60    0.12 
  -3  -7   4    0.68    0.15 
   2   7  -4   19.34    0.62 
   2   7  -4   20.51    0.47 
  -2  -7   4   21.16    0.56 
  -2  -7   4   20.64    0.67 
  -2  -7   4   20.82    0.61 
   1   7  -4    0.53    0.08 
  -1  -7   4    0.53    0.08 
  -1  -7   4    0.57    0.11 
  -1  -7   4    0.50    0.13 
  -1  -7   4    0.75    0.13 
   0   7  -4    0.92    0.11 
   0  -7   4    0.78    0.14 
   0  -7   4    1.04    0.14 
   0  -7   4    0.93    0.08 
   0  -7   4    0.86    0.11 
  -1   7  -4    1.94    0.16 
   1  -7   4    1.77    0.13 
   1  -7   4    1.35    0.17 
   1  -7   4    1.76    0.17 
  -2   7  -4    0.03    0.08 
   2  -7   4   -0.07    0.06 
   2  -7   4    0.10    0.10 
   2  -7   4    0.06    0.07 
  -3   7  -4    9.02    0.36 
   3  -7   4    8.67    0.27 
   3  -7   4    9.12    0.36 
   3  -7   4    9.27    0.41 
  -4   7  -4    0.05    0.04 
  -4   7  -4    0.10    0.10 
   4  -7   4    0.13    0.10 
   4  -7   4    0.16    0.16 
   4  -7   4    0.05    0.08 
  -5   7  -4    0.62    0.14 
   5  -7   4    0.42    0.13 
   5  -7   4    0.09    0.17 
  -6   7  -4    0.67    0.16 
   6  -7   4    0.44    0.14 
   6  -7   4    0.67    0.23 
  -7   7  -4    0.47    0.17 
   7  -7   4    0.63    0.17 
   7  -7   4    0.90    0.27 
  -8   7  -4    0.59    0.19 
   8  -7   4    0.31    0.17 
   8  -7   4    0.50    0.25 
  -9   7  -4    0.11    0.17 
   9  -7   4    0.03    0.17 
   9  -7   4   -0.14    0.26 
 -10   7  -4   -0.13    0.16 
  10  -7   4    0.09    0.27 
  10  -7   4    0.02    0.27 
   9   6  -4    0.85    0.27 
   9   6  -4    1.19    0.27 
  -9  -6   4    0.42    0.19 
  -9  -6   4    0.83    0.22 
   8   6  -4    3.43    0.42 
   8   6  -4    2.60    0.35 
  -8  -6   4    2.56    0.32 
  -8  -6   4    2.52    0.33 
   7   6  -4    0.12    0.16 
   7   6  -4    0.40    0.19 
  -7  -6   4    0.20    0.15 
  -7  -6   4    0.26    0.14 
   6   6  -4    2.58    0.30 
   6   6  -4    2.08    0.30 
  -6  -6   4    2.12    0.25 
  -6  -6   4    2.07    0.26 
   5   6  -4    1.54    0.20 
  -5  -6   4    1.71    0.20 
  -5  -6   4    1.65    0.23 
  -5  -6   4    1.28    0.19 
   4   6  -4   -0.04    0.08 
  -4  -6   4   -0.11    0.09 
  -4  -6   4    0.04    0.09 
  -4  -6   4    0.13    0.10 
   3   6  -4    0.05    0.09 
  -3  -6   4    0.19    0.10 
  -3  -6   4    0.21    0.11 
  -3  -6   4   -0.01    0.07 
   2   6  -4    0.11    0.04 
   2   6  -4    0.03    0.07 
  -2  -6   4    0.06    0.08 
  -2  -6   4    0.22    0.07 
  -2  -6   4    0.02    0.08 
   1   6  -4   15.98    0.40 
  -1  -6   4   15.84    0.49 
  -1  -6   4   16.31    0.41 
  -1  -6   4   16.08    0.52 
  -1  -6   4   15.58    0.46 
   0   6  -4    5.71    0.22 
   0  -6   4    6.15    0.23 
   0  -6   4    5.59    0.27 
   0  -6   4    5.94    0.17 
   0  -6   4    5.65    0.25 
  -1   6  -4    0.14    0.08 
   1  -6   4    0.23    0.09 
   1  -6   4    0.20    0.08 
   1  -6   4    0.12    0.05 
  -2   6  -4   11.71    0.38 
   2  -6   4   11.99    0.31 
   2  -6   4   11.53    0.42 
   2  -6   4   11.41    0.39 
  -3   6  -4    0.06    0.09 
  -3   6  -4    0.04    0.03 
   3  -6   4    0.04    0.08 
   3  -6   4    0.05    0.06 
   3  -6   4    0.00    0.10 
  -4   6  -4    0.82    0.08 
  -4   6  -4    0.68    0.13 
   4  -6   4    0.79    0.17 
   4  -6   4    0.81    0.10 
   4  -6   4    0.85    0.15 
  -5   6  -4    0.12    0.06 
  -5   6  -4   -0.04    0.11 
   5  -6   4    0.13    0.15 
   5  -6   4    0.15    0.11 
   5  -6   4    0.29    0.08 
  -6   6  -4    0.30    0.08 
  -6   6  -4    0.11    0.12 
   6  -6   4   -0.11    0.10 
   6  -6   4    0.21    0.16 
  -7   6  -4    5.63    0.28 
  -7   6  -4    5.05    0.34 
   7  -6   4    4.54    0.34 
   7  -6   4    5.04    0.43 
  -8   6  -4   -0.09    0.14 
   8  -6   4   -0.03    0.20 
   8  -6   4   -0.27    0.12 
  -9   6  -4   -0.02    0.14 
   9  -6   4    0.11    0.17 
   9  -6   4   -0.35    0.20 
  10  -6   4    0.71    0.33 
  10  -6   4    0.02    0.19 
   9   5  -4    0.03    0.23 
   9   5  -4    0.11    0.17 
  -9  -5   4    0.13    0.15 
  -9  -5   4    0.06    0.14 
   8   5  -4    0.27    0.21 
   8   5  -4    0.42    0.19 
  -8  -5   4   -0.08    0.11 
  -8  -5   4   -0.01    0.14 
   7   5  -4    1.47    0.27 
   7   5  -4    1.63    0.26 
  -7  -5   4    1.62    0.24 
  -7  -5   4    1.67    0.25 
   6   5  -4    1.99    0.27 
   6   5  -4    1.70    0.24 
  -6  -5   4    1.24    0.22 
  -6  -5   4    2.13    0.24 
   5   5  -4   13.02    0.52 
  -5  -5   4   13.51    0.57 
  -5  -5   4   14.52    0.52 
  -5  -5   4   13.86    0.54 
   4   5  -4    0.06    0.10 
  -4  -5   4    0.07    0.09 
  -4  -5   4    0.08    0.09 
  -4  -5   4   -0.10    0.06 
   3   5  -4    0.33    0.04 
   3   5  -4    0.25    0.10 
  -3  -5   4    0.09    0.07 
  -3  -5   4    0.26    0.09 
  -3  -5   4    0.24    0.11 
   2   5  -4    2.49    0.10 
   2   5  -4    2.25    0.17 
  -2  -5   4    2.36    0.15 
  -2  -5   4    2.35    0.18 
  -2  -5   4    2.22    0.17 
   1   5  -4    2.32    0.12 
  -1  -5   4    2.36    0.12 
  -1  -5   4    2.50    0.17 
  -1  -5   4    2.39    0.18 
  -1  -5   4    2.57    0.16 
   0   5  -4    0.66    0.09 
   0  -5   4    0.67    0.11 
   0  -5   4    0.70    0.11 
   0  -5   4    0.76    0.06 
   0  -5   4    0.92    0.09 
  -1   5  -4    0.37    0.08 
   1  -5   4    0.23    0.05 
   1  -5   4    0.27    0.08 
   1  -5   4    0.19    0.10 
  -2   5  -4    3.18    0.18 
   2  -5   4    3.34    0.12 
   2  -5   4    3.36    0.21 
   2  -5   4    3.19    0.18 
  -3   5  -4    0.02    0.08 
  -3   5  -4    0.05    0.03 
   3  -5   4   -0.01    0.07 
   3  -5   4    0.02    0.10 
   3  -5   4    0.05    0.05 
  -4   5  -4    0.19    0.10 
  -4   5  -4    0.15    0.05 
   4  -5   4    0.16    0.13 
   4  -5   4    0.15    0.06 
   4  -5   4    0.16    0.10 
  -5   5  -4    4.95    0.29 
  -5   5  -4    4.91    0.22 
   5  -5   4    4.75    0.30 
   5  -5   4    4.99    0.21 
   5  -5   4    4.69    0.35 
  -6   5  -4    7.20    0.36 
  -6   5  -4    7.90    0.32 
   6  -5   4    7.69    0.46 
   6  -5   4    7.53    0.39 
   6  -5   4    7.98    0.30 
  -7   5  -4    6.30    0.31 
  -7   5  -4    6.14    0.35 
   7  -5   4    6.20    0.46 
   7  -5   4    5.76    0.38 
  -8   5  -4    0.34    0.16 
  -8   5  -4    0.67    0.14 
   8  -5   4    0.40    0.26 
   8  -5   4    0.82    0.21 
  -9   5  -4   -0.01    0.14 
   9  -5   4    0.08    0.26 
   9  -5   4   -0.26    0.14 
  10  -5   4    2.54    0.43 
  10  -5   4    3.11    0.38 
  10   4  -4    0.56    0.24 
  10   4  -4   -0.20    0.23 
 -10  -4   4    0.18    0.17 
   9   4  -4    1.26    0.28 
   9   4  -4    1.15    0.29 
  -9  -4   4    1.26    0.26 
  -9  -4   4    1.15    0.23 
   8   4  -4    0.29    0.19 
   8   4  -4    0.12    0.17 
  -8  -4   4    0.04    0.14 
  -8  -4   4   -0.08    0.12 
   7   4  -4   -0.05    0.13 
   7   4  -4    0.14    0.14 
  -7  -4   4    0.17    0.12 
  -7  -4   4    0.06    0.12 
   6   4  -4    0.06    0.13 
   6   4  -4    0.15    0.12 
  -6  -4   4    0.07    0.10 
  -6  -4   4    0.04    0.11 
   5   4  -4    0.98    0.16 
   5   4  -4    1.01    0.18 
  -5  -4   4    0.90    0.15 
  -5  -4   4    1.43    0.20 
   4   4  -4    8.75    0.36 
  -4  -4   4    9.97    0.40 
  -4  -4   4    9.92    0.43 
  -4  -4   4   10.16    0.38 
  -4  -4   4    9.95    0.24 
   3   4  -4   14.44    0.46 
  -3  -4   4   14.82    0.34 
  -3  -4   4   15.22    0.48 
  -3  -4   4   14.88    0.45 
  -3  -4   4   14.19    0.50 
   2   4  -4   10.14    0.25 
   2   4  -4   10.02    0.34 
  -2  -4   4   10.34    0.31 
  -2  -4   4    9.62    0.33 
  -2  -4   4    9.68    0.36 
   1   4  -4    0.74    0.07 
  -1  -4   4    0.79    0.08 
  -1  -4   4    0.65    0.09 
  -1  -4   4    0.83    0.09 
  -1  -4   4    0.83    0.11 
   0   4  -4   -0.08    0.05 
   0  -4   4   -0.02    0.04 
   0  -4   4   -0.01    0.03 
   0  -4   4    0.09    0.06 
   0  -4   4    0.05    0.07 
  -1   4  -4    1.27    0.11 
   1  -4   4    1.38    0.12 
   1  -4   4    1.34    0.13 
   1  -4   4    1.23    0.07 
  -2   4  -4    6.87    0.17 
  -2   4  -4    6.72    0.26 
   2  -4   4    6.98    0.28 
   2  -4   4    6.70    0.16 
   2  -4   4    6.93    0.27 
  -3   4  -4    6.34    0.26 
  -3   4  -4    5.77    0.19 
   3  -4   4    6.00    0.17 
   3  -4   4    5.75    0.26 
   3  -4   4    6.50    0.30 
  -4   4  -4    1.73    0.17 
  -4   4  -4    1.50    0.12 
   4  -4   4    1.13    0.17 
   4  -4   4    1.33    0.17 
  -5   4  -4    0.35    0.09 
  -5   4  -4    0.42    0.12 
  -5   4  -4    0.49    0.09 
   5  -4   4    0.32    0.12 
   5  -4   4    0.35    0.16 
  -6   4  -4    0.07    0.11 
  -6   4  -4    0.20    0.08 
  -6   4  -4    0.24    0.09 
   6  -4   4   -0.03    0.16 
   6  -4   4    0.14    0.13 
  -7   4  -4    0.80    0.15 
  -7   4  -4    1.36    0.19 
  -7   4  -4    0.87    0.16 
   7  -4   4    1.05    0.20 
   7  -4   4    1.03    0.25 
  -8   4  -4    0.34    0.14 
  -8   4  -4    0.42    0.13 
   8  -4   4    0.31    0.19 
   8  -4   4    0.46    0.24 
  -9   4  -4    0.21    0.11 
   9  -4   4   -0.02    0.16 
   9  -4   4   -0.17    0.24 
  10  -4   4    0.53    0.32 
  10  -4   4    0.31    0.22 
  10   3  -4    0.18    0.19 
  10   3  -4   -0.26    0.22 
 -10  -3   4    0.19    0.16 
 -10  -3   4    0.18    0.17 
   9   3  -4    2.35    0.35 
   9   3  -4    2.81    0.40 
  -9  -3   4    1.94    0.31 
  -9  -3   4    2.03    0.29 
   8   3  -4    0.10    0.17 
   8   3  -4   -0.05    0.13 
  -8  -3   4    0.03    0.13 
  -8  -3   4    0.07    0.13 
   7   3  -4    0.32    0.16 
   7   3  -4    0.59    0.17 
  -7  -3   4    0.43    0.15 
  -7  -3   4    0.25    0.13 
   6   3  -4    3.84    0.32 
   6   3  -4    3.84    0.29 
  -6  -3   4    3.95    0.28 
  -6  -3   4    3.47    0.27 
   5   3  -4    2.14    0.21 
   5   3  -4    2.31    0.22 
  -5  -3   4    1.58    0.19 
  -5  -3   4    1.96    0.11 
  -5  -3   4    2.17    0.21 
   4   3  -4    3.93    0.26 
   4   3  -4    3.67    0.22 
  -4  -3   4    3.45    0.23 
  -4  -3   4    3.46    0.21 
  -4  -3   4    3.99    0.14 
   3   3  -4    0.75    0.11 
  -3  -3   4    0.91    0.07 
  -3  -3   4    0.73    0.11 
  -3  -3   4    0.75    0.12 
  -3  -3   4    0.78    0.10 
   2   3  -4    9.40    0.30 
  -2  -3   4    8.69    0.32 
  -2  -3   4    9.02    0.30 
  -2  -3   4    8.92    0.28 
  -2  -3   4    9.08    0.24 
  -1  -3   4    2.96    0.12 
  -1  -3   4    3.09    0.15 
  -1  -3   4    3.36    0.17 
  -1  -3   4    3.03    0.15 
  -1  -3   4    3.08    0.13 
   0   3  -4    2.16    0.11 
   0  -3   4    2.47    0.13 
   0  -3   4    2.44    0.10 
   0  -3   4    2.32    0.13 
   0  -3   4    2.40    0.09 
  -1   3  -4    1.93    0.08 
  -1   3  -4    2.22    0.12 
   1  -3   4    2.21    0.13 
   1  -3   4    1.91    0.13 
  -2   3  -4    7.80    0.21 
  -2   3  -4    7.70    0.27 
   2  -3   4    7.56    0.17 
   2  -3   4    7.95    0.28 
   2  -3   4    7.95    0.17 
   2  -3   4    8.09    0.28 
  -3   3  -4   18.84    0.43 
  -3   3  -4   19.40    0.47 
  -3   3  -4   18.38    0.51 
   3  -3   4   19.31    0.54 
   3  -3   4   18.98    0.53 
  -4   3  -4   16.82    0.48 
  -4   3  -4   16.20    0.45 
  -4   3  -4   15.54    0.42 
   4  -3   4   16.67    0.52 
   4  -3   4   16.43    0.52 
  -5   3  -4    0.24    0.10 
  -5   3  -4    0.13    0.06 
  -5   3  -4    0.07    0.07 
   5  -3   4    0.10    0.13 
   5  -3   4    0.20    0.13 
  -6   3  -4   10.35    0.38 
  -6   3  -4   10.76    0.41 
  -6   3  -4   10.86    0.40 
   6  -3   4   10.28    0.49 
   6  -3   4   11.16    0.48 
  -7   3  -4    0.04    0.08 
  -7   3  -4    0.06    0.08 
  -7   3  -4   -0.12    0.10 
   7  -3   4    0.09    0.14 
   7  -3   4   -0.13    0.17 
  -8   3  -4   -0.03    0.09 
  -8   3  -4    0.02    0.12 
   8  -3   4    0.18    0.21 
   8  -3   4   -0.15    0.16 
  -9   3  -4    4.20    0.33 
   9  -3   4    3.88    0.41 
   9  -3   4    3.91    0.46 
 -10   3  -4    1.89    0.26 
  10  -3   4    2.16    0.40 
  10  -3   4    1.14    0.31 
  10   2  -4    0.21    0.25 
  10   2  -4    1.04    0.30 
 -10  -2   4    0.72    0.23 
 -10  -2   4    0.55    0.22 
   9   2  -4    0.15    0.19 
   9   2  -4   -0.24    0.19 
  -9  -2   4    0.03    0.13 
  -9  -2   4    0.15    0.15 
   8   2  -4    0.05    0.16 
   8   2  -4    0.08    0.16 
  -8  -2   4    0.00    0.12 
  -8  -2   4   -0.17    0.10 
   7   2  -4    0.09    0.14 
   7   2  -4    0.13    0.14 
  -7  -2   4    0.05    0.12 
  -7  -2   4    0.05    0.11 
   6   2  -4    7.05    0.41 
   6   2  -4    6.72    0.35 
  -6  -2   4    6.25    0.36 
  -6  -2   4    6.63    0.36 
  -6  -2   4    6.58    0.24 
   5   2  -4    1.38    0.17 
   5   2  -4    1.80    0.22 
  -5  -2   4    1.19    0.16 
  -5  -2   4    1.69    0.11 
  -5  -2   4    1.12    0.16 
   4   2  -4    0.56    0.13 
   4   2  -4    0.53    0.11 
  -4  -2   4    0.69    0.12 
  -4  -2   4    0.51    0.11 
  -4  -2   4    0.69    0.08 
   3   2  -4    1.00    0.11 
   3   2  -4    0.83    0.12 
  -3  -2   4    1.09    0.12 
  -3  -2   4    0.70    0.10 
  -3  -2   4    1.07    0.08 
   2   2  -4    4.02    0.17 
  -2  -2   4    4.26    0.18 
  -2  -2   4    4.15    0.14 
  -2  -2   4    4.13    0.19 
  -2  -2   4    3.97    0.19 
  -1  -2   4    5.43    0.18 
  -1  -2   4    5.29    0.16 
  -1  -2   4    5.11    0.17 
  -1  -2   4    5.17    0.18 
  -1  -2   4    5.33    0.20 
   0  -2   4    7.31    0.22 
   0  -2   4    6.97    0.19 
   0  -2   4    7.51    0.21 
   0  -2   4    7.02    0.19 
   0  -2   4    7.22    0.21 
  -1   2  -4    1.00    0.08 
  -1   2  -4    1.15    0.04 
  -1   2  -4    0.96    0.09 
   1  -2   4    1.07    0.09 
   1  -2   4    1.09    0.10 
  -2   2  -4   44.38    0.94 
  -2   2  -4   44.99    0.97 
  -2   2  -4   45.26    0.90 
   2  -2   4   42.67    0.99 
   2  -2   4   45.62    0.97 
  -3   2  -4   10.52    0.32 
  -3   2  -4   10.39    0.28 
  -3   2  -4   10.35    0.31 
   3  -2   4   10.96    0.37 
   3  -2   4   10.52    0.35 
  -4   2  -4    6.03    0.25 
  -4   2  -4    5.87    0.24 
  -4   2  -4    6.08    0.22 
   4  -2   4    5.64    0.29 
   4  -2   4    6.37    0.29 
  -5   2  -4   12.74    0.42 
  -5   2  -4   12.89    0.41 
  -5   2  -4   12.63    0.40 
   5  -2   4   12.54    0.47 
   5  -2   4   13.17    0.50 
  -6   2  -4    2.32    0.20 
  -6   2  -4    2.40    0.20 
  -6   2  -4    2.37    0.19 
   6  -2   4    2.03    0.25 
   6  -2   4    2.66    0.28 
  -7   2  -4    0.11    0.09 
  -7   2  -4   -0.01    0.08 
  -7   2  -4   -0.05    0.09 
   7  -2   4   -0.10    0.14 
   7  -2   4   -0.23    0.14 
  -8   2  -4    0.08    0.09 
  -8   2  -4    0.01    0.10 
   8  -2   4    0.07    0.20 
   8  -2   4   -0.19    0.16 
  -9   2  -4    2.56    0.30 
   9  -2   4    1.95    0.34 
   9  -2   4    2.78    0.40 
 -10   2  -4    0.38    0.17 
  10  -2   4    0.60    0.31 
  10  -2   4    0.25    0.24 
  10   1  -4    0.21    0.24 
 -10  -1   4    0.38    0.18 
 -10  -1   4    0.08    0.14 
   9   1  -4    0.00    0.19 
   9   1  -4    0.05    0.20 
  -9  -1   4   -0.04    0.13 
  -9  -1   4   -0.11    0.12 
   8   1  -4   -0.17    0.15 
   8   1  -4    0.52    0.21 
  -8  -1   4    0.08    0.12 
  -8  -1   4   -0.16    0.10 
   7   1  -4    0.44    0.16 
   7   1  -4    0.44    0.18 
  -7  -1   4    0.37    0.12 
  -7  -1   4    0.49    0.15 
   6   1  -4    0.15    0.12 
   6   1  -4    0.22    0.13 
  -6  -1   4    0.15    0.07 
  -6  -1   4    0.16    0.09 
  -6  -1   4    0.37    0.13 
   5   1  -4   15.95    0.50 
   5   1  -4   15.79    0.58 
  -5  -1   4   16.58    0.45 
  -5  -1   4   15.61    0.53 
  -5  -1   4   17.84    0.57 
   4   1  -4   20.81    0.56 
   4   1  -4   20.83    0.63 
  -4  -1   4   21.74    0.62 
  -4  -1   4   21.11    0.52 
   3   1  -4   12.87    0.42 
   3   1  -4   12.67    0.36 
  -3  -1   4   12.95    0.39 
  -3  -1   4   13.13    0.40 
  -3  -1   4   13.28    0.35 
   2   1  -4    2.68    0.12 
   2   1  -4    2.45    0.15 
  -2  -1   4    2.53    0.12 
  -2  -1   4    2.67    0.15 
  -2  -1   4    2.81    0.14 
  -1  -1   4    1.28    0.08 
  -1  -1   4    1.16    0.09 
  -1  -1   4    1.18    0.09 
  -1  -1   4    1.31    0.08 
  -1  -1   4    1.15    0.09 
   0   1  -4   17.34    0.40 
   0   1  -4   17.17    0.39 
   0  -1   4   17.55    0.41 
   0  -1   4   17.18    0.40 
   0  -1   4   17.50    0.37 
  -1   1  -4    0.84    0.07 
  -1   1  -4    0.79    0.08 
   1  -1   4    0.72    0.06 
   1  -1   4    0.80    0.09 
   1  -1   4    0.68    0.07 
  -2   1  -4    9.75    0.28 
  -2   1  -4    9.60    0.26 
  -2   1  -4    9.95    0.29 
   2  -1   4    9.43    0.28 
   2  -1   4    9.47    0.31 
  -3   1  -4    1.30    0.10 
  -3   1  -4    1.41    0.12 
  -3   1  -4    1.49    0.13 
   3  -1   4    1.84    0.18 
   3  -1   4    1.26    0.14 
  -4   1  -4    3.38    0.19 
  -4   1  -4    3.05    0.17 
  -4   1  -4    3.23    0.17 
   4  -1   4    3.37    0.24 
   4  -1   4    3.03    0.21 
  -5   1  -4    4.64    0.23 
  -5   1  -4    4.85    0.26 
  -5   1  -4    4.71    0.23 
   5  -1   4    4.44    0.31 
   5  -1   4    4.67    0.29 
  -6   1  -4    4.36    0.25 
  -6   1  -4    3.88    0.26 
  -6   1  -4    3.94    0.22 
   6  -1   4    3.70    0.30 
   6  -1   4    3.93    0.33 
  -7   1  -4    0.49    0.12 
  -7   1  -4    0.49    0.14 
  -7   1  -4    0.48    0.12 
   7  -1   4    0.23    0.17 
   7  -1   4    0.57    0.19 
  -8   1  -4    1.64    0.24 
  -8   1  -4    1.72    0.22 
   8  -1   4    1.43    0.28 
   8  -1   4    1.73    0.30 
  -9   1  -4    1.15    0.21 
   9  -1   4    0.73    0.26 
   9  -1   4    1.32    0.31 
 -10   1  -4    0.31    0.16 
  10  -1   4    0.56    0.28 
  10  -1   4    0.11    0.25 
  10   0  -4    0.43    0.25 
 -10   0   4    0.18    0.18 
 -10   0   4    0.78    0.21 
   9   0  -4    1.64    0.29 
   9   0  -4    1.24    0.29 
  -9   0   4    1.50    0.27 
  -9   0   4    1.39    0.24 
   8   0  -4    1.54    0.29 
   8   0  -4    1.03    0.23 
  -8   0   4    1.24    0.20 
  -8   0   4    1.05    0.19 
   7   0  -4    1.00    0.23 
   7   0  -4    0.72    0.18 
  -7   0   4    1.51    0.21 
  -7   0   4    1.11    0.19 
  -7   0   4    1.00    0.14 
   6   0  -4    0.04    0.15 
   6   0  -4    0.11    0.12 
  -6   0   4    0.06    0.10 
  -6   0   4    0.14    0.08 
  -6   0   4   -0.02    0.08 
   5   0  -4    9.12    0.34 
   5   0  -4    8.09    0.39 
  -5   0   4    9.21    0.36 
  -5   0   4    7.51    0.35 
  -5   0   4    8.90    0.31 
   4   0  -4    1.30    0.18 
   4   0  -4    1.23    0.13 
  -4   0   4    1.40    0.12 
  -4   0   4    1.11    0.13 
  -4   0   4    1.26    0.15 
   3   0  -4    0.19    0.10 
   3   0  -4    0.15    0.06 
  -3   0   4    0.05    0.07 
  -3   0   4    0.19    0.06 
  -3   0   4    0.10    0.07 
   2   0  -4    1.58    0.14 
   2   0  -4    1.67    0.09 
  -2   0   4    1.64    0.13 
  -2   0   4    1.61    0.12 
  -2   0   4    1.83    0.11 
   1   0  -4   -0.03    0.04 
   1   0  -4    0.00    0.04 
  -1   0   4    0.03    0.02 
  -1   0   4   -0.03    0.04 
  -1   0   4    0.00    0.04 
   0   0  -4    0.66    0.05 
   0   0  -4    0.51    0.07 
   0   0  -4    0.69    0.08 
   0   0   4    0.74    0.07 
   0   0   4    0.64    0.04 
  -1   0  -4    0.73    0.08 
  -1   0  -4    1.06    0.10 
   1   0   4    0.86    0.05 
   1   0   4    0.91    0.08 
   1   0   4    0.73    0.08 
  -2   0  -4    0.56    0.08 
  -2   0  -4    0.56    0.09 
  -2   0  -4    0.67    0.07 
   2   0   4    0.56    0.11 
   2   0   4    0.58    0.07 
  -3   0  -4   16.33    0.44 
  -3   0  -4   15.59    0.45 
  -3   0  -4   16.40    0.41 
   3   0   4   16.84    0.49 
   3   0   4   16.24    0.45 
  -4   0  -4    1.44    0.12 
  -4   0  -4    1.28    0.14 
  -4   0  -4    1.75    0.14 
   4   0   4    2.08    0.21 
   4   0   4    1.57    0.15 
  -5   0  -4    9.77    0.37 
  -5   0  -4    9.44    0.31 
  -5   0  -4   10.23    0.40 
   5   0   4    9.61    0.40 
   5   0   4    9.86    0.44 
  -6   0  -4    0.04    0.07 
  -6   0  -4   -0.16    0.08 
  -6   0  -4    0.01    0.08 
   6   0   4    0.01    0.12 
   6   0   4   -0.13    0.12 
  -7   0  -4    2.50    0.26 
  -7   0  -4    2.18    0.22 
   7   0   4    2.45    0.32 
   7   0   4    2.36    0.29 
  -8   0  -4    0.00    0.10 
  -8   0  -4    0.19    0.12 
   8   0   4    0.53    0.23 
   8   0   4    0.39    0.19 
  -9   0  -4    0.03    0.12 
  -9   0  -4    0.06    0.13 
   9   0   4    0.17    0.22 
   9   0   4   -0.14    0.22 
 -10   0  -4    0.28    0.17 
  10   0   4    0.81    0.29 
  10   0   4   -0.22    0.23 
  10  -1  -4    0.19    0.25 
 -10   1   4    0.15    0.15 
 -10   1   4   -0.34    0.14 
   9  -1  -4   -0.16    0.22 
  -9   1   4   -0.16    0.13 
  -9   1   4    0.20    0.13 
   8  -1  -4    0.20    0.18 
   8  -1  -4   -0.01    0.15 
  -8   1   4    0.28    0.10 
  -8   1   4    0.16    0.13 
  -8   1   4    0.06    0.12 
   7  -1  -4    0.80    0.17 
   7  -1  -4    0.66    0.21 
  -7   1   4    1.04    0.15 
  -7   1   4    1.04    0.18 
  -7   1   4    0.64    0.16 
   6  -1  -4    0.05    0.11 
   6  -1  -4    0.06    0.16 
  -6   1   4    0.21    0.10 
  -6   1   4    0.07    0.08 
  -6   1   4    0.23    0.11 
   5  -1  -4    6.05    0.27 
   5  -1  -4    5.93    0.34 
  -5   1   4    5.87    0.26 
  -5   1   4    6.09    0.31 
  -5   1   4    6.17    0.30 
   4  -1  -4    1.10    0.17 
   4  -1  -4    1.04    0.12 
  -4   1   4    0.94    0.11 
  -4   1   4    0.82    0.12 
  -4   1   4    0.89    0.13 
   3  -1  -4    0.98    0.09 
   3  -1  -4    0.61    0.12 
  -3   1   4    0.98    0.11 
  -3   1   4    0.91    0.11 
  -3   1   4    0.97    0.11 
   2  -1  -4   13.04    0.38 
   2  -1  -4   12.99    0.39 
   2  -1  -4   14.34    0.30 
  -2   1   4   13.24    0.36 
  -2   1   4   13.15    0.37 
   1  -1  -4   37.19    0.81 
   1  -1  -4   37.33    0.82 
   1  -1  -4   37.42    0.83 
  -1   1   4   37.62    0.82 
   0  -1  -4   22.71    0.55 
   0  -1  -4   23.90    0.49 
   0  -1  -4   22.45    0.54 
   0   1   4   23.26    0.50 
   0   1   4   21.96    0.52 
  -1  -1  -4   10.78    0.32 
  -1  -1  -4   11.57    0.27 
  -1  -1  -4   11.10    0.32 
   1   1   4   11.38    0.32 
   1   1   4   11.35    0.29 
  -2  -1  -4    0.32    0.08 
  -2  -1  -4    0.33    0.06 
  -2  -1  -4    0.37    0.09 
   2   1   4    0.40    0.10 
   2   1   4    0.38    0.06 
  -3  -1  -4    8.35    0.30 
  -3  -1  -4    8.37    0.24 
  -3  -1  -4    7.94    0.30 
   3   1   4    8.55    0.33 
   3   1   4    8.34    0.29 
  -4  -1  -4    1.47    0.15 
  -4  -1  -4    1.80    0.18 
  -4  -1  -4    1.69    0.12 
   4   1   4    1.81    0.16 
   4   1   4    1.63    0.19 
  -5  -1  -4    1.48    0.13 
  -5  -1  -4    1.50    0.18 
  -5  -1  -4    1.44    0.17 
   5   1   4    1.50    0.18 
   5   1   4    1.21    0.21 
  -6  -1  -4    1.00    0.16 
  -6  -1  -4    1.06    0.16 
   6   1   4    1.16    0.19 
   6   1   4    1.11    0.23 
  -7  -1  -4    0.14    0.10 
  -7  -1  -4    0.47    0.14 
   7   1   4    0.23    0.15 
   7   1   4    0.14    0.18 
  -8  -1  -4    0.42    0.15 
  -8  -1  -4    0.47    0.16 
   8   1   4    0.37    0.22 
   8   1   4    0.62    0.20 
  -9  -1  -4    0.05    0.12 
  -9  -1  -4    0.38    0.17 
   9   1   4    0.45    0.22 
   9   1   4    0.26    0.26 
 -10  -1  -4    0.03    0.15 
  10   1   4   -0.22    0.23 
  10   1   4    0.07    0.24 
  10  -2  -4   -0.18    0.26 
  10  -2  -4    0.13    0.14 
 -10   2   4    0.20    0.14 
   9  -2  -4    0.23    0.25 
   9  -2  -4    0.23    0.15 
  -9   2   4    0.33    0.16 
   8  -2  -4    3.19    0.29 
   8  -2  -4    3.08    0.39 
  -8   2   4    3.48    0.26 
  -8   2   4    3.09    0.29 
  -8   2   4    3.56    0.31 
   7  -2  -4    0.12    0.13 
   7  -2  -4    0.11    0.20 
  -7   2   4    0.04    0.11 
  -7   2   4    0.03    0.08 
  -7   2   4    0.20    0.11 
   6  -2  -4    0.44    0.13 
   6  -2  -4    0.54    0.19 
  -6   2   4    0.44    0.12 
  -6   2   4    0.45    0.12 
  -6   2   4    0.54    0.12 
   5  -2  -4    3.62    0.29 
   5  -2  -4    4.23    0.22 
  -5   2   4    3.90    0.23 
  -5   2   4    4.44    0.26 
  -5   2   4    4.00    0.22 
   4  -2  -4   13.44    0.45 
   4  -2  -4   13.36    0.48 
   4  -2  -4   14.25    0.38 
  -4   2   4   14.11    0.43 
  -4   2   4   13.64    0.43 
   3  -2  -4   14.94    0.35 
   3  -2  -4   14.13    0.46 
   3  -2  -4   15.40    0.45 
  -3   2   4   14.51    0.42 
  -3   2   4   14.13    0.41 
   2  -2  -4   25.02    0.49 
   2  -2  -4   24.79    0.62 
   2  -2  -4   22.82    0.61 
  -2   2   4   25.11    0.50 
  -2   2   4   24.14    0.59 
  -2   2   4   24.61    0.60 
   1  -2  -4   15.58    0.41 
   1  -2  -4   15.48    0.44 
   1  -2  -4   15.71    0.42 
  -1   2   4   15.65    0.41 
  -1   2   4   16.20    0.33 
   0  -2  -4    0.12    0.07 
   0  -2  -4    0.16    0.09 
   0  -2  -4    0.11    0.05 
   0   2   4    0.02    0.04 
   0   2   4   -0.02    0.05 
  -1  -2  -4    0.11    0.04 
  -1  -2  -4    0.16    0.08 
  -1  -2  -4    0.15    0.07 
   1   2   4    0.08    0.07 
   1   2   4    0.14    0.04 
  -2  -2  -4    3.32    0.19 
  -2  -2  -4    3.28    0.19 
  -2  -2  -4    3.14    0.15 
   2   2   4    3.17    0.13 
   2   2   4    3.16    0.19 
  -3  -2  -4    4.44    0.23 
  -3  -2  -4    4.32    0.21 
  -3  -2  -4    4.24    0.23 
  -3  -2  -4    4.40    0.15 
   3   2   4    3.93    0.24 
  -4  -2  -4    0.62    0.07 
  -4  -2  -4    0.55    0.11 
  -4  -2  -4    0.43    0.12 
   4   2   4    0.65    0.12 
   4   2   4    0.59    0.15 
  -5  -2  -4    4.77    0.29 
  -5  -2  -4    5.68    0.30 
  -5  -2  -4    5.34    0.21 
   5   2   4    5.23    0.36 
   5   2   4    4.60    0.29 
  -6  -2  -4    0.85    0.15 
  -6  -2  -4    1.01    0.17 
   6   2   4    0.59    0.21 
   6   2   4    0.87    0.17 
  -7  -2  -4    0.21    0.12 
  -7  -2  -4    0.11    0.13 
   7   2   4   -0.19    0.16 
   7   2   4    0.25    0.14 
  -8  -2  -4   -0.02    0.11 
  -8  -2  -4    0.24    0.15 
   8   2   4   -0.02    0.14 
   8   2   4   -0.04    0.21 
  -9  -2  -4    2.33    0.31 
  -9  -2  -4    1.71    0.27 
   9   2   4    2.50    0.35 
   9   2   4    1.93    0.38 
  10   2   4   -0.56    0.39 
  10  -3  -4    0.10    0.13 
  10  -3  -4   -0.03    0.29 
 -10   3   4    0.18    0.14 
   9  -3  -4    0.52    0.16 
   9  -3  -4    0.45    0.29 
  -9   3   4    0.57    0.17 
  -9   3   4    0.44    0.15 
   8  -3  -4    1.02    0.19 
   8  -3  -4    0.53    0.24 
  -8   3   4    0.63    0.16 
  -8   3   4    0.76    0.16 
   7  -3  -4    0.25    0.22 
   7  -3  -4    0.28    0.13 
   7  -3  -4    0.66    0.15 
  -7   3   4    0.29    0.12 
  -7   3   4    0.43    0.13 
   6  -3  -4    1.98    0.22 
   6  -3  -4    2.09    0.30 
   6  -3  -4    1.85    0.18 
  -6   3   4    1.86    0.20 
  -6   3   4    1.94    0.20 
   5  -3  -4    0.36    0.11 
   5  -3  -4    0.08    0.14 
   5  -3  -4    0.24    0.08 
  -5   3   4    0.17    0.09 
  -5   3   4    0.11    0.10 
   4  -3  -4    5.62    0.34 
   4  -3  -4    6.24    0.21 
   4  -3  -4    6.22    0.28 
  -4   3   4    6.26    0.28 
  -4   3   4    6.21    0.27 
   3  -3  -4    8.85    0.23 
   3  -3  -4    8.40    0.35 
   3  -3  -4    8.68    0.33 
  -3   3   4    8.62    0.31 
  -3   3   4    9.09    0.31 
   2  -3  -4    1.76    0.17 
   2  -3  -4    2.06    0.08 
   2  -3  -4    1.77    0.18 
   2  -3  -4    1.74    0.13 
  -2   3   4    1.89    0.15 
   1  -3  -4    0.38    0.10 
   1  -3  -4    0.03    0.09 
   1  -3  -4    0.12    0.07 
  -1   3   4    0.07    0.05 
  -1   3   4    0.06    0.03 
   0  -3  -4    0.92    0.12 
   0  -3  -4    1.04    0.12 
   0  -3  -4    1.05    0.10 
   0   3   4    0.99    0.09 
   0   3   4    1.14    0.10 
  -1  -3  -4    4.42    0.24 
  -1  -3  -4    4.44    0.19 
  -1  -3  -4    4.72    0.23 
   1   3   4    4.12    0.20 
   1   3   4    4.37    0.16 
  -2  -3  -4    1.32    0.15 
  -2  -3  -4    1.19    0.12 
  -2  -3  -4    1.06    0.14 
   2   3   4    1.29    0.15 
   2   3   4    1.17    0.08 
  -3  -3  -4    8.29    0.23 
  -3  -3  -4    7.91    0.33 
  -3  -3  -4    8.46    0.34 
  -3  -3  -4    8.23    0.32 
   3   3   4    8.61    0.36 
  -4  -3  -4    0.47    0.13 
  -4  -3  -4    0.54    0.06 
  -4  -3  -4    0.40    0.11 
   4   3   4    0.57    0.16 
   4   3   4    0.36    0.11 
  -5  -3  -4    0.66    0.13 
  -5  -3  -4    0.67    0.16 
   5   3   4    1.03    0.21 
   5   3   4    0.94    0.16 
  -6  -3  -4    0.68    0.16 
  -6  -3  -4    0.80    0.16 
   6   3   4    1.15    0.25 
   6   3   4    1.08    0.19 
  -7  -3  -4    0.34    0.14 
  -7  -3  -4    0.21    0.13 
   7   3   4    0.54    0.17 
   7   3   4    0.11    0.20 
  -8  -3  -4    0.36    0.17 
  -8  -3  -4    0.10    0.13 
   8   3   4    0.11    0.23 
   8   3   4    0.47    0.18 
  -9  -3  -4    0.01    0.12 
   9   3   4    0.59    0.21 
   9   3   4    0.32    0.25 
  10  -4  -4    0.35    0.33 
  10  -4  -4    0.66    0.19 
 -10   4   4    0.62    0.17 
   9  -4  -4    0.17    0.15 
   9  -4  -4   -0.08    0.23 
  -9   4   4    0.17    0.13 
  -9   4   4    0.07    0.12 
   8  -4  -4    0.99    0.20 
   8  -4  -4    1.17    0.32 
  -8   4   4    0.93    0.18 
  -8   4   4    0.76    0.17 
   7  -4  -4    0.05    0.11 
   7  -4  -4   -0.11    0.20 
  -7   4   4   -0.09    0.08 
  -7   4   4    0.13    0.12 
   6  -4  -4    0.43    0.14 
   6  -4  -4    0.40    0.20 
   6  -4  -4    0.31    0.10 
  -6   4   4    0.56    0.12 
  -6   4   4    0.37    0.13 
   5  -4  -4    0.38    0.12 
   5  -4  -4    0.39    0.18 
   5  -4  -4    0.24    0.08 
  -5   4   4    0.53    0.13 
  -5   4   4    0.29    0.10 
   4  -4  -4   -0.09    0.09 
   4  -4  -4    0.06    0.14 
   4  -4  -4    0.00    0.05 
  -4   4   4    0.06    0.08 
  -4   4   4   -0.04    0.06 
   3  -4  -4    3.76    0.23 
   3  -4  -4    3.58    0.25 
   3  -4  -4    3.79    0.14 
  -3   4   4    3.41    0.21 
  -3   4   4    3.55    0.19 
   2  -4  -4   20.19    0.45 
   2  -4  -4   20.24    0.53 
   2  -4  -4   20.57    0.58 
   2  -4  -4   20.30    0.58 
  -2   4   4   19.58    0.54 
   1  -4  -4   18.01    0.48 
   1  -4  -4   16.12    0.50 
   1  -4  -4   17.66    0.50 
  -1   4   4   16.59    0.46 
  -1   4   4   17.74    0.41 
   0  -4  -4    1.81    0.18 
   0  -4  -4    1.79    0.16 
   0  -4  -4    1.71    0.14 
   0   4   4    1.87    0.12 
   0   4   4    1.71    0.12 
  -1  -4  -4    1.20    0.12 
  -1  -4  -4    1.20    0.14 
  -1  -4  -4    1.34    0.15 
   1   4   4    1.12    0.09 
   1   4   4    0.95    0.11 
  -2  -4  -4    0.34    0.09 
  -2  -4  -4    0.27    0.10 
  -2  -4  -4    0.23    0.09 
   2   4   4    0.36    0.10 
   2   4   4    0.33    0.05 
  -3  -4  -4   26.86    0.73 
  -3  -4  -4   26.51    0.74 
  -3  -4  -4   27.73    0.58 
  -3  -4  -4   26.83    0.76 
   3   4   4   26.69    0.75 
  -4  -4  -4    1.12    0.16 
  -4  -4  -4    0.95    0.16 
  -4  -4  -4    1.01    0.17 
   4   4   4    1.07    0.20 
  -5  -4  -4    2.54    0.23 
  -5  -4  -4    2.52    0.24 
   5   4   4    2.57    0.29 
   5   4   4    2.80    0.24 
  -6  -4  -4    0.17    0.12 
  -6  -4  -4    0.16    0.13 
   6   4   4   -0.04    0.15 
   6   4   4    0.27    0.13 
  -7  -4  -4    0.15    0.13 
  -7  -4  -4   -0.10    0.10 
   7   4   4   -0.11    0.19 
   7   4   4    0.48    0.16 
  -8  -4  -4    3.80    0.39 
  -8  -4  -4    3.98    0.36 
   8   4   4    4.26    0.37 
   8   4   4    3.37    0.44 
  -9  -4  -4    1.87    0.29 
  -9  -4  -4    1.85    0.30 
   9   4   4    1.80    0.39 
  10  -5  -4   -0.13    0.29 
 -10   5   4    0.00    0.13 
 -10   5   4   -0.15    0.13 
   9  -5  -4    1.08    0.21 
   9  -5  -4    0.69    0.32 
  -9   5   4    1.22    0.21 
  -9   5   4    0.96    0.20 
   8  -5  -4    0.52    0.26 
   8  -5  -4    0.82    0.20 
  -8   5   4    0.64    0.16 
  -8   5   4    0.45    0.16 
   7  -5  -4    0.14    0.12 
   7  -5  -4    0.05    0.19 
  -7   5   4   -0.07    0.08 
  -7   5   4   -0.04    0.10 
   6  -5  -4    1.63    0.22 
   6  -5  -4    1.14    0.25 
  -6   5   4    1.89    0.20 
  -6   5   4    1.05    0.17 
   5  -5  -4    0.51    0.09 
   5  -5  -4    0.49    0.15 
   5  -5  -4    0.76    0.21 
  -5   5   4    0.62    0.13 
  -5   5   4    0.55    0.12 
   4  -5  -4    1.01    0.10 
   4  -5  -4    0.93    0.16 
   4  -5  -4    1.00    0.20 
  -4   5   4    0.88    0.12 
  -4   5   4    0.65    0.14 
   3  -5  -4    1.70    0.22 
   3  -5  -4    1.48    0.14 
   3  -5  -4    1.30    0.18 
   3  -5  -4    1.21    0.09 
  -3   5   4    1.40    0.16 
   2  -5  -4    4.77    0.28 
   2  -5  -4    4.19    0.26 
   2  -5  -4    4.73    0.17 
   2  -5  -4    4.86    0.23 
  -2   5   4    4.48    0.23 
   1  -5  -4    5.44    0.30 
   1  -5  -4    5.61    0.25 
   1  -5  -4    5.23    0.27 
  -1   5   4    5.39    0.23 
  -1   5   4    5.88    0.20 
   0  -5  -4    3.64    0.21 
   0  -5  -4    3.60    0.21 
   0  -5  -4    3.76    0.24 
   0   5   4    3.72    0.18 
   0   5   4    3.96    0.18 
  -1  -5  -4   18.18    0.57 
  -1  -5  -4   18.84    0.55 
  -1  -5  -4   19.26    0.55 
   1   5   4   19.23    0.48 
   1   5   4   19.05    0.53 
  -2  -5  -4   -0.01    0.07 
  -2  -5  -4    0.09    0.10 
  -2  -5  -4    0.07    0.11 
   2   5   4    0.11    0.04 
   2   5   4    0.01    0.09 
  -3  -5  -4    0.04    0.07 
  -3  -5  -4    0.07    0.11 
  -3  -5  -4    0.07    0.09 
   3   5   4   -0.02    0.11 
  -4  -5  -4    1.31    0.18 
  -4  -5  -4    0.91    0.16 
  -4  -5  -4    0.81    0.16 
   4   5   4    1.34    0.21 
  -5  -5  -4    0.31    0.14 
  -5  -5  -4    0.19    0.13 
   5   5   4    0.27    0.13 
   5   5   4    0.38    0.17 
  -6  -5  -4    0.26    0.15 
  -6  -5  -4    0.33    0.15 
   6   5   4    0.26    0.20 
   6   5   4    0.25    0.13 
  -7  -5  -4    0.48    0.18 
  -7  -5  -4    0.07    0.13 
   7   5   4    0.00    0.18 
   7   5   4    0.64    0.18 
  -8  -5  -4    2.31    0.31 
  -8  -5  -4    2.16    0.31 
   8   5   4    1.96    0.35 
   8   5   4    3.48    0.34 
  -9  -5  -4    0.76    0.25 
  -9  -5  -4    0.23    0.17 
   9   5   4   -0.02    0.28 
  10  -6  -4   -0.21    0.30 
 -10   6   4    0.63    0.20 
   9  -6  -4    0.22    0.15 
   9  -6  -4    0.00    0.30 
  -9   6   4    0.01    0.14 
  -9   6   4    0.33    0.17 
   8  -6  -4    0.08    0.24 
   8  -6  -4    0.27    0.15 
  -8   6   4    0.18    0.15 
  -8   6   4   -0.01    0.10 
   7  -6  -4    0.17    0.14 
   7  -6  -4    0.16    0.22 
  -7   6   4    0.12    0.13 
  -7   6   4    0.08    0.09 
   6  -6  -4    2.64    0.27 
   6  -6  -4    2.06    0.30 
  -6   6   4    1.95    0.23 
  -6   6   4    2.84    0.22 
   5  -6  -4    0.10    0.13 
   5  -6  -4    0.21    0.20 
  -5   6   4   -0.02    0.10 
  -5   6   4    0.17    0.09 
   4  -6  -4    1.68    0.12 
   4  -6  -4    1.93    0.17 
   4  -6  -4    1.88    0.22 
   4  -6  -4    1.52    0.23 
  -4   6   4    1.85    0.20 
   3  -6  -4    4.02    0.29 
   3  -6  -4    3.57    0.16 
   3  -6  -4    3.75    0.22 
   3  -6  -4    4.05    0.31 
  -3   6   4    3.30    0.24 
   2  -6  -4    2.87    0.26 
   2  -6  -4    3.03    0.21 
   2  -6  -4    3.61    0.25 
   2  -6  -4    3.20    0.15 
  -2   6   4    3.52    0.22 
   1  -6  -4    1.47    0.18 
   1  -6  -4    1.81    0.17 
   1  -6  -4    2.25    0.21 
  -1   6   4    1.71    0.15 
  -1   6   4    2.10    0.14 
   0  -6  -4    4.54    0.29 
   0  -6  -4    4.62    0.25 
   0  -6  -4    4.50    0.26 
   0   6   4    4.82    0.21 
   0   6   4    4.81    0.23 
  -1  -6  -4    0.17    0.09 
  -1  -6  -4    0.35    0.12 
  -1  -6  -4    0.30    0.12 
   1   6   4    0.12    0.09 
   1   6   4    0.19    0.06 
  -2  -6  -4   12.79    0.49 
  -2  -6  -4   13.37    0.47 
  -2  -6  -4   13.05    0.47 
   2   6   4   13.19    0.47 
   2   6   4   12.64    0.34 
  -3  -6  -4    1.96    0.20 
  -3  -6  -4    2.80    0.24 
  -3  -6  -4    2.44    0.25 
   3   6   4    2.24    0.25 
  -4  -6  -4    0.85    0.18 
  -4  -6  -4    0.83    0.16 
  -4  -6  -4    1.09    0.18 
   4   6   4    1.00    0.20 
  -5  -6  -4    0.33    0.14 
  -5  -6  -4    0.41    0.15 
  -5  -6  -4    0.53    0.16 
   5   6   4    0.69    0.20 
  -6  -6  -4    0.05    0.13 
  -6  -6  -4   -0.09    0.10 
   6   6   4    0.27    0.20 
   6   6   4    0.12    0.12 
  -7  -6  -4    0.99    0.22 
  -7  -6  -4    1.19    0.23 
   7   6   4    1.61    0.26 
   7   6   4    1.21    0.31 
  -8  -6  -4    1.98    0.32 
  -8  -6  -4    2.04    0.32 
   8   6   4    1.46    0.34 
  10  -7  -4   -0.22    0.33 
 -10   7   4    0.32    0.18 
   9  -7  -4    0.30    0.32 
  -9   7   4    0.24    0.16 
   8  -7  -4   -0.27    0.24 
   8  -7  -4    0.30    0.16 
  -8   7   4   -0.04    0.14 
   7  -7  -4    0.19    0.14 
   7  -7  -4   -0.16    0.22 
  -7   7   4   -0.11    0.11 
  -7   7   4   -0.12    0.09 
   6  -7  -4    0.03    0.13 
   6  -7  -4   -0.07    0.20 
   6  -7  -4    0.02    0.08 
  -6   7   4    0.01    0.11 
   5  -7  -4    1.81    0.23 
   5  -7  -4    1.75    0.18 
   5  -7  -4    1.78    0.27 
  -5   7   4    1.61    0.22 
   4  -7  -4    3.50    0.22 
   4  -7  -4    4.06    0.32 
   4  -7  -4    3.47    0.34 
  -4   7   4    4.35    0.29 
   3  -7  -4    9.87    0.37 
   3  -7  -4   10.56    0.46 
   3  -7  -4   10.27    0.48 
   3  -7  -4    9.64    0.31 
  -3   7   4    9.81    0.40 
   2  -7  -4    5.95    0.35 
   2  -7  -4    6.17    0.29 
   2  -7  -4    6.04    0.35 
  -2   7   4    6.40    0.24 
  -2   7   4    5.66    0.28 
   1  -7  -4    1.45    0.20 
   1  -7  -4    1.12    0.17 
   1  -7  -4    1.15    0.15 
  -1   7   4    1.11    0.12 
  -1   7   4    1.17    0.14 
   0  -7  -4    1.85    0.19 
   0  -7  -4    2.60    0.22 
   0  -7  -4    2.32    0.25 
   0   7   4    2.16    0.15 
   0   7   4    2.42    0.19 
  -1  -7  -4    1.85    0.23 
  -1  -7  -4    2.18    0.20 
  -1  -7  -4    2.48    0.22 
   1   7   4    2.04    0.14 
   1   7   4    1.70    0.19 
  -2  -7  -4    6.58    0.37 
  -2  -7  -4    6.92    0.34 
  -2  -7  -4    6.50    0.34 
   2   7   4    6.62    0.34 
  -3  -7  -4    1.62    0.21 
  -3  -7  -4    1.46    0.22 
  -3  -7  -4    1.98    0.23 
   3   7   4    1.65    0.22 
  -4  -7  -4    1.93    0.22 
  -4  -7  -4    1.87    0.25 
  -4  -7  -4    1.87    0.23 
   4   7   4    1.85    0.25 
  -5  -7  -4    0.13    0.11 
  -5  -7  -4    0.35    0.16 
  -5  -7  -4    0.19    0.14 
   5   7   4    0.37    0.20 
  -6  -7  -4    0.25    0.15 
  -6  -7  -4   -0.07    0.13 
   6   7   4    0.03    0.11 
   6   7   4    0.15    0.20 
  -7  -7  -4   -0.20    0.14 
  -7  -7  -4    0.19    0.15 
   7   7   4   -0.02    0.23 
   7   7   4    0.44    0.16 
  -8  -7  -4    0.00    0.15 
  -8  -7  -4   -0.05    0.15 
   8   7   4    0.15    0.24 
   9  -8  -4    0.38    0.33 
  -9   8   4    1.03    0.24 
   8  -8  -4    0.11    0.17 
   8  -8  -4   -0.12    0.23 
  -8   8   4    0.01    0.14 
   7  -8  -4    0.25    0.18 
   7  -8  -4    0.10    0.24 
  -7   8   4    0.09    0.14 
   6  -8  -4    2.80    0.36 
   6  -8  -4    3.47    0.25 
   6  -8  -4    3.83    0.35 
  -6   8   4    3.13    0.32 
   5  -8  -4    0.26    0.20 
   5  -8  -4    0.22    0.15 
   5  -8  -4    0.13    0.09 
  -5   8   4    0.25    0.13 
   4  -8  -4    0.09    0.09 
   4  -8  -4   -0.12    0.13 
   4  -8  -4    0.13    0.16 
  -4   8   4    0.03    0.10 
   3  -8  -4    0.61    0.19 
   3  -8  -4    0.55    0.09 
   3  -8  -4    0.62    0.12 
   3  -8  -4    0.52    0.18 
  -3   8   4    0.58    0.14 
   2  -8  -4    2.39    0.27 
   2  -8  -4    2.50    0.26 
   2  -8  -4    2.26    0.21 
  -2   8   4    2.47    0.20 
  -2   8   4    2.44    0.17 
   1  -8  -4   -0.01    0.12 
   1  -8  -4   -0.05    0.10 
   1  -8  -4    0.04    0.09 
  -1   8   4    0.02    0.07 
  -1   8   4   -0.02    0.07 
   0  -8  -4    0.76    0.16 
   0  -8  -4    0.85    0.19 
   0  -8  -4    1.36    0.17 
   0   8   4    1.04    0.15 
   0   8   4    0.96    0.12 
  -1  -8  -4    0.67    0.15 
  -1  -8  -4    0.60    0.17 
  -1  -8  -4    0.69    0.15 
   1   8   4    0.72    0.15 
   1   8   4    0.52    0.09 
  -2  -8  -4    0.28    0.14 
  -2  -8  -4    0.45    0.13 
  -2  -8  -4    0.51    0.15 
   2   8   4    0.52    0.15 
  -3  -8  -4    3.95    0.29 
  -3  -8  -4    4.00    0.34 
  -3  -8  -4    4.24    0.31 
   3   8   4    4.00    0.32 
  -4  -8  -4    0.54    0.18 
  -4  -8  -4    0.67    0.17 
  -4  -8  -4    0.63    0.16 
   4   8   4    0.78    0.20 
  -5  -8  -4    0.11    0.13 
  -5  -8  -4    0.21    0.15 
  -5  -8  -4    0.21    0.14 
   5   8   4    0.28    0.19 
  -6  -8  -4   -0.09    0.12 
  -6  -8  -4    0.08    0.15 
   6   8   4    0.12    0.20 
   6   8   4    0.05    0.13 
  -7  -8  -4    0.71    0.23 
  -7  -8  -4    0.50    0.20 
   7   8   4    0.42    0.26 
   9  -9  -4   -0.34    0.24 
  -9   9   4   -0.10    0.15 
   8  -9  -4   -0.23    0.23 
  -8   9   4   -0.24    0.14 
   7  -9  -4    0.28    0.20 
   7  -9  -4    0.51    0.28 
  -7   9   4    0.59    0.19 
   6  -9  -4   -0.37    0.19 
   6  -9  -4   -0.15    0.16 
  -6   9   4    0.09    0.15 
   5  -9  -4    1.37    0.24 
   5  -9  -4    1.20    0.26 
  -5   9   4    1.46    0.23 
   4  -9  -4    1.04    0.23 
   4  -9  -4    0.96    0.15 
   4  -9  -4    1.44    0.24 
  -4   9   4    1.20    0.20 
   3  -9  -4    0.41    0.12 
   3  -9  -4    0.51    0.19 
   3  -9  -4    0.31    0.16 
  -3   9   4    0.32    0.12 
   2  -9  -4    0.01    0.13 
   2  -9  -4    0.03    0.11 
   2  -9  -4    0.21    0.12 
  -2   9   4    0.27    0.10 
  -2   9   4    0.29    0.09 
   1  -9  -4    0.60    0.14 
   1  -9  -4    0.97    0.20 
   1  -9  -4    0.67    0.18 
  -1   9   4    0.96    0.14 
  -1   9   4    0.76    0.13 
   0  -9  -4   -0.23    0.12 
   0  -9  -4   -0.08    0.08 
   0  -9  -4   -0.16    0.10 
   0   9   4    0.06    0.07 
   0   9   4    0.09    0.09 
  -1  -9  -4    2.86    0.27 
  -1  -9  -4    4.00    0.30 
  -1  -9  -4    3.10    0.29 
   1   9   4    3.58    0.28 
  -2  -9  -4    0.11    0.14 
  -2  -9  -4    0.00    0.10 
  -2  -9  -4   -0.14    0.11 
   2   9   4    0.05    0.12 
  -3  -9  -4    0.57    0.18 
  -3  -9  -4    0.76    0.17 
  -3  -9  -4    0.69    0.18 
   3   9   4    0.65    0.18 
  -4  -9  -4    0.18    0.15 
  -4  -9  -4    0.02    0.10 
  -4  -9  -4    0.16    0.14 
   4   9   4   -0.13    0.14 
  -5  -9  -4    0.03    0.14 
  -5  -9  -4    0.09    0.12 
  -5  -9  -4    0.20    0.15 
   5   9   4    0.10    0.18 
  -6  -9  -4   -0.07    0.13 
  -6  -9  -4    0.03    0.17 
   6   9   4    0.34    0.22 
  -7  -9  -4   -0.20    0.15 
  -7  -9  -4   -0.06    0.16 
   7   9   4    0.23    0.25 
  -9  10   4   -0.14    0.28 
   8 -10  -4   -0.33    0.23 
  -8  10   4   -0.09    0.15 
   7 -10  -4    0.20    0.22 
  -7  10   4   -0.24    0.11 
   6 -10  -4    1.32    0.27 
   6 -10  -4    1.23    0.31 
  -6  10   4    0.89    0.21 
   5 -10  -4   -0.07    0.16 
   5 -10  -4    0.02    0.18 
  -5  10   4   -0.23    0.11 
   4 -10  -4   -0.05    0.13 
   4 -10  -4   -0.03    0.16 
  -4  10   4   -0.01    0.10 
   3 -10  -4    1.55    0.25 
   3 -10  -4    2.25    0.31 
  -3  10   4    2.17    0.24 
   2 -10  -4    0.04    0.14 
   2 -10  -4    0.14    0.14 
   2 -10  -4    0.07    0.11 
  -2  10   4    0.04    0.09 
   1 -10  -4   -0.03    0.11 
   1 -10  -4    0.05    0.13 
   1 -10  -4    0.03    0.15 
  -1  10   4    0.11    0.09 
  -1  10   4    0.10    0.09 
   0 -10  -4    0.47    0.16 
   0 -10  -4    0.32    0.16 
   0 -10  -4    0.33    0.14 
   0  10   4    0.47    0.13 
   0  10   4    0.32    0.10 
  -1 -10  -4    1.01    0.21 
  -1 -10  -4    1.42    0.20 
  -1 -10  -4    1.82    0.26 
   1  10   4    1.45    0.20 
  -2 -10  -4    0.45    0.16 
  -2 -10  -4    0.50    0.18 
  -2 -10  -4    0.50    0.16 
   2  10   4    0.35    0.15 
  -3 -10  -4    0.89    0.20 
  -3 -10  -4    1.14    0.23 
  -3 -10  -4    1.61    0.24 
   3  10   4    1.77    0.26 
  -4 -10  -4   -0.15    0.11 
  -4 -10  -4    0.01    0.15 
  -4 -10  -4   -0.07    0.10 
   4  10   4    0.18    0.17 
  -5 -10  -4    0.37    0.19 
  -5 -10  -4    0.16    0.14 
  -5 -10  -4    0.05    0.14 
   5  10   4    0.34    0.21 
  -6 -10  -4    0.75    0.22 
  -6 -10  -4    0.45    0.22 
   6  10   4    0.75    0.27 
   8 -11  -4    0.14    0.28 
  -8  11   4    0.15    0.19 
   7 -11  -4    1.16    0.34 
  -7  11   4    0.84    0.23 
   6 -11  -4    0.13    0.20 
   6 -11  -4    0.06    0.21 
  -6  11   4    0.08    0.16 
   5 -11  -4    1.05    0.29 
   5 -11  -4    0.60    0.23 
  -5  11   4    0.86    0.21 
   4 -11  -4    4.07    0.39 
   4 -11  -4    3.79    0.39 
  -4  11   4    3.48    0.30 
   3 -11  -4    2.08    0.29 
   3 -11  -4    1.54    0.28 
  -3  11   4    2.18    0.25 
   2 -11  -4    0.33    0.19 
   2 -11  -4    0.51    0.19 
  -2  11   4    0.40    0.13 
   1 -11  -4    0.34    0.16 
   1 -11  -4    0.34    0.17 
  -1  11   4    0.33    0.12 
  -1  11   4    0.55    0.15 
   0 -11  -4    0.75    0.20 
   0 -11  -4    0.46    0.18 
   0 -11  -4    0.49    0.15 
   0  11   4    0.54    0.14 
  -1 -11  -4    0.62    0.19 
  -1 -11  -4    0.39    0.18 
  -1 -11  -4    0.54    0.16 
   1  11   4    0.65    0.18 
  -2 -11  -4   -0.18    0.15 
  -2 -11  -4    0.09    0.12 
  -2 -11  -4    0.06    0.14 
   2  11   4    0.19    0.14 
  -3 -11  -4    0.01    0.16 
  -3 -11  -4   -0.14    0.12 
  -3 -11  -4    0.02    0.11 
   3  11   4    0.24    0.16 
  -4 -11  -4   -0.02    0.14 
  -4 -11  -4   -0.03    0.11 
  -4 -11  -4    0.06    0.16 
   4  11   4    0.52    0.21 
  -5 -11  -4    0.09    0.15 
  -5 -11  -4    0.22    0.19 
   5  11   4    0.40    0.21 
   7 -12  -4   -0.13    0.23 
  -7  12   4    0.26    0.17 
   6 -12  -4    0.13    0.22 
  -6  12   4    0.42    0.19 
   5 -12  -4    0.55    0.24 
   5 -12  -4    0.19    0.22 
  -5  12   4    0.85    0.21 
   4 -12  -4    0.07    0.19 
   4 -12  -4   -0.07    0.17 
  -4  12   4    0.03    0.14 
   3 -12  -4   -0.10    0.17 
   3 -12  -4   -0.14    0.14 
  -3  12   4   -0.05    0.11 
   2 -12  -4    0.49    0.21 
   2 -12  -4    0.42    0.18 
  -2  12   4    0.34    0.14 
   1 -12  -4    0.31    0.16 
   1 -12  -4    0.08    0.17 
   0 -12  -4   -0.08    0.12 
   0 -12  -4   -0.44    0.12 
   0  12   4    0.16    0.14 
  -1 -12  -4    0.57    0.21 
  -1 -12  -4    0.67    0.20 
   1  12   4    0.79    0.17 
  -2 -12  -4    0.28    0.16 
  -2 -12  -4    0.40    0.22 
  -2 -12  -4    0.04    0.15 
   2  12   4    0.57    0.17 
  -3 -12  -4   -0.06    0.14 
  -3 -12  -4    0.21    0.16 
  -3 -12  -4    0.19    0.15 
   3  12   4    0.18    0.16 
  -4 -12  -4   -0.10    0.16 
  -4 -12  -4   -0.05    0.14 
   4  12   4    0.30    0.19 
   6 -13  -4   -0.27    0.16 
  -6  13   4   -0.11    0.15 
   5 -13  -4    0.34    0.24 
  -5  13   4    0.46    0.18 
   4 -13  -4    0.02    0.20 
   4 -13  -4    0.69    0.25 
  -4  13   4    0.39    0.17 
   3 -13  -4    0.67    0.24 
   3 -13  -4    0.91    0.26 
  -3  13   4    0.48    0.16 
   2 -13  -4    0.14    0.17 
   2 -13  -4    0.15    0.19 
   1 -13  -4    0.35    0.20 
   1 -13  -4    0.06    0.15 
   0 -13  -4   -0.06    0.14 
   0 -13  -4   -0.02    0.17 
  -1 -13  -4    0.92    0.23 
  -1 -13  -4    1.01    0.26 
  -2 -13  -4    0.90    0.26 
  -2 -13  -4    0.99    0.24 
   2  13   4    1.32    0.23 
  -3 -13  -4   -0.22    0.14 
   3  13   4    0.41    0.18 
   5 -14  -4    2.04    0.36 
  -5  14   4    2.95    0.36 
   4 -14  -4    0.72    0.24 
  -4  14   4    0.82    0.21 
   3 -14  -4    0.24    0.20 
   3 -14  -4   -0.12    0.19 
  -3  14   4    0.31    0.15 
   2 -14  -4   -0.10    0.15 
   2 -14  -4   -0.13    0.16 
   1 -14  -4    2.85    0.39 
   1 -14  -4    2.67    0.36 
   0 -14  -4   -0.02    0.19 
   0 -14  -4    0.13    0.16 
  -1 -14  -4    0.24    0.17 
  -1 -14  -4    0.01    0.18 
  -2 -14  -4   -0.14    0.17 
   3 -15  -4    0.09    0.18 
   2 -15  -4   -0.33    0.17 
   2 -15  -4   -0.20    0.16 
   1 -15  -4    0.77    0.25 
   1 -15  -4    0.37    0.21 
   2  16  -5    0.30    0.18 
   1  16  -5    0.25    0.16 
  -1 -16   5    0.42    0.21 
   0  16  -5    2.06    0.30 
   0 -16   5    1.66    0.33 
  -1  16  -5    0.19    0.16 
   1 -16   5   -0.12    0.17 
  -2  16  -5    0.03    0.12 
   2 -16   5    0.00    0.19 
   3 -16   5    0.96    0.23 
   3 -16   5    0.68    0.25 
  -4  16  -5   -0.13    0.16 
   4 -16   5    0.02    0.17 
  -5  16  -5    0.29    0.22 
   3  15  -5    0.24    0.15 
  -3 -15   5    0.04    0.15 
  -3 -15   5   -0.08    0.15 
   2  15  -5    0.28    0.17 
  -2 -15   5    0.30    0.17 
  -2 -15   5    0.06    0.17 
   1  15  -5    4.55    0.40 
  -1 -15   5    4.59    0.39 
  -1 -15   5    4.42    0.45 
   0  15  -5    4.85    0.40 
   0 -15   5    5.04    0.47 
  -1  15  -5    0.31    0.17 
   1 -15   5    0.03    0.16 
   2 -15   5    0.00    0.18 
   2 -15   5    0.07    0.13 
  -3  15  -5    4.15    0.37 
   3 -15   5    4.07    0.49 
   3 -15   5    4.81    0.38 
  -4  15  -5    2.18    0.30 
   4 -15   5    2.25    0.39 
   4 -15   5    2.32    0.31 
  -5  15  -5   -0.11    0.17 
   5 -15   5    0.13    0.22 
  -6  15  -5    0.06    0.18 
   6 -15   5    0.07    0.23 
   4  14  -5    0.58    0.21 
  -4 -14   5    0.09    0.17 
  -4 -14   5    0.03    0.15 
   3  14  -5    0.36    0.18 
  -3 -14   5    0.41    0.18 
  -3 -14   5    0.08    0.17 
   2  14  -5    0.14    0.16 
  -2 -14   5   -0.06    0.17 
  -2 -14   5   -0.10    0.13 
   1  14  -5    0.00    0.15 
  -1 -14   5    0.02    0.13 
  -1 -14   5   -0.15    0.14 
   0  14  -5    0.16    0.13 
   0 -14   5   -0.03    0.12 
   0 -14   5   -0.10    0.13 
   1 -14   5    0.91    0.24 
   1 -14   5    0.43    0.17 
  -2  14  -5   -0.03    0.12 
   2 -14   5   -0.01    0.17 
   2 -14   5    0.23    0.13 
   3 -14   5    0.24    0.20 
   3 -14   5    0.17    0.13 
  -4  14  -5    0.20    0.17 
   4 -14   5    0.13    0.20 
   4 -14   5    0.16    0.13 
  -5  14  -5    0.12    0.15 
   5 -14   5    0.12    0.13 
   5 -14   5    0.18    0.20 
  -6  14  -5    2.46    0.35 
   6 -14   5    2.10    0.38 
  -7  14  -5    0.25    0.21 
   7 -14   5    0.46    0.29 
   5  13  -5    0.17    0.17 
  -5 -13   5   -0.13    0.13 
  -5 -13   5    0.04    0.16 
   4  13  -5    0.83    0.22 
  -4 -13   5    0.78    0.24 
  -4 -13   5    0.57    0.21 
   3  13  -5    0.58    0.19 
  -3 -13   5    0.95    0.22 
  -3 -13   5    0.71    0.23 
   2  13  -5    4.88    0.39 
  -2 -13   5    4.69    0.38 
  -2 -13   5    5.11    0.43 
   1  13  -5   11.41    0.57 
  -1 -13   5   13.61    0.68 
  -1 -13   5   13.54    0.56 
   0  13  -5    0.15    0.13 
   0 -13   5    0.13    0.15 
   0 -13   5   -0.04    0.11 
  -1  13  -5   -0.07    0.10 
   1 -13   5    0.18    0.15 
   1 -13   5    0.07    0.13 
   1 -13   5    0.02    0.12 
  -2  13  -5    2.96    0.29 
   2 -13   5    2.50    0.30 
   2 -13   5    2.40    0.33 
  -3  13  -5    1.56    0.23 
   3 -13   5    1.41    0.27 
   3 -13   5    1.49    0.23 
  -4  13  -5    0.58    0.20 
   4 -13   5    0.57    0.23 
   4 -13   5    0.84    0.19 
  -5  13  -5   -0.25    0.15 
   5 -13   5    0.04    0.20 
   5 -13   5   -0.04    0.11 
  -6  13  -5    0.64    0.21 
   6 -13   5    0.91    0.30 
   6 -13   5    0.83    0.19 
  -7  13  -5    1.39    0.28 
   7 -13   5    1.49    0.33 
  -8  13  -5   -0.12    0.20 
   8 -13   5   -0.26    0.23 
   6  12  -5    1.25    0.28 
  -6 -12   5    1.02    0.25 
  -6 -12   5    0.65    0.26 
  -6 -12   5    1.45    0.32 
   5  12  -5    0.20    0.19 
  -5 -12   5    0.11    0.16 
  -5 -12   5    0.36    0.18 
   4  12  -5    1.27    0.24 
  -4 -12   5    0.97    0.24 
  -4 -12   5    1.28    0.25 
   3  12  -5    0.08    0.15 
  -3 -12   5    0.17    0.14 
  -3 -12   5   -0.07    0.12 
   2  12  -5    2.60    0.30 
  -2 -12   5    2.58    0.29 
  -2 -12   5    2.87    0.35 
   1  12  -5    6.01    0.39 
  -1 -12   5    5.17    0.34 
  -1 -12   5    5.19    0.42 
   0  12  -5    1.05    0.24 
   0 -12   5    1.22    0.19 
   0 -12   5    1.23    0.22 
   0 -12   5    1.08    0.22 
  -1  12  -5    0.03    0.10 
   1 -12   5    0.04    0.13 
   1 -12   5    0.07    0.10 
   1 -12   5   -0.04    0.09 
  -2  12  -5    6.30    0.35 
   2 -12   5    5.53    0.41 
   2 -12   5    5.79    0.36 
  -3  12  -5    0.53    0.16 
   3 -12   5    0.45    0.18 
   3 -12   5    0.85    0.18 
  -4  12  -5   -0.05    0.13 
   4 -12   5   -0.15    0.13 
   4 -12   5    0.00    0.10 
  -5  12  -5    0.66    0.20 
   5 -12   5    0.51    0.21 
   5 -12   5    0.55    0.16 
  -6  12  -5    0.82    0.23 
   6 -12   5    0.50    0.17 
   6 -12   5    0.78    0.27 
  -7  12  -5    0.27    0.20 
   7 -12   5    0.17    0.15 
   7 -12   5    0.10    0.24 
  -8  12  -5    0.12    0.21 
   8 -12   5    0.61    0.30 
   7  11  -5    0.55    0.21 
   7  11  -5    0.36    0.22 
  -7 -11   5    0.10    0.19 
  -7 -11   5    0.01    0.15 
   6  11  -5    0.14    0.17 
  -6 -11   5   -0.01    0.13 
  -6 -11   5    0.01    0.15 
  -6 -11   5    0.00    0.14 
   5  11  -5    0.29    0.17 
  -5 -11   5    0.06    0.13 
  -5 -11   5   -0.09    0.12 
  -5 -11   5    0.01    0.12 
   4  11  -5    0.02    0.13 
  -4 -11   5    0.02    0.14 
  -4 -11   5   -0.09    0.12 
  -4 -11   5    0.05    0.11 
   3  11  -5    0.99    0.20 
  -3 -11   5    1.14    0.21 
  -3 -11   5    1.36    0.25 
  -3 -11   5    1.39    0.18 
   2  11  -5    3.71    0.31 
  -2 -11   5    3.73    0.35 
  -2 -11   5    3.29    0.29 
   1  11  -5    1.86    0.25 
  -1 -11   5    2.03    0.22 
  -1 -11   5    1.64    0.26 
   0  11  -5    2.10    0.19 
   0 -11   5    2.07    0.20 
   0 -11   5    1.47    0.21 
   0 -11   5    1.61    0.25 
  -1  11  -5    0.55    0.14 
   1 -11   5    0.68    0.18 
   1 -11   5    0.76    0.16 
   1 -11   5    0.45    0.12 
  -2  11  -5    0.30    0.13 
   2 -11   5    0.03    0.08 
   2 -11   5    0.17    0.11 
   2 -11   5    0.03    0.13 
  -3  11  -5    0.21    0.14 
   3 -11   5    0.10    0.10 
   3 -11   5    0.09    0.13 
  -4  11  -5    0.13    0.14 
   4 -11   5    0.22    0.12 
   4 -11   5    0.17    0.18 
  -5  11  -5    1.38    0.25 
   5 -11   5    1.53    0.28 
   5 -11   5    1.69    0.23 
  -6  11  -5    0.08    0.16 
   6 -11   5    0.27    0.14 
   6 -11   5    0.07    0.20 
  -7  11  -5   -0.17    0.14 
   7 -11   5    0.07    0.13 
   7 -11   5   -0.09    0.18 
  -8  11  -5    2.65    0.36 
   8 -11   5    2.64    0.43 
   8 -11   5    2.94    0.45 
  -9  11  -5    0.90    0.25 
   9 -11   5    1.17    0.37 
   7  10  -5    0.25    0.21 
   7  10  -5    0.40    0.20 
  -7 -10   5    0.48    0.19 
  -7 -10   5    0.16    0.19 
   6  10  -5    0.42    0.18 
  -6 -10   5    0.17    0.13 
  -6 -10   5   -0.16    0.13 
  -6 -10   5    0.21    0.16 
   5  10  -5    2.85    0.34 
  -5 -10   5    1.86    0.30 
  -5 -10   5    1.98    0.24 
  -5 -10   5    2.44    0.31 
   4  10  -5    0.43    0.17 
  -4 -10   5    0.64    0.18 
  -4 -10   5    0.73    0.21 
  -4 -10   5    0.57    0.14 
   3  10  -5    1.81    0.25 
  -3 -10   5    2.47    0.27 
  -3 -10   5    2.20    0.21 
  -3 -10   5    2.29    0.30 
   2  10  -5    6.10    0.36 
  -2 -10   5    6.15    0.28 
  -2 -10   5    5.46    0.33 
  -2 -10   5    5.36    0.38 
   1  10  -5    0.21    0.08 
  -1 -10   5    0.33    0.08 
  -1 -10   5    0.19    0.11 
  -1 -10   5    0.32    0.11 
  -1 -10   5    0.21    0.13 
   0  10  -5   -0.07    0.08 
   0 -10   5   -0.03    0.08 
   0 -10   5    0.08    0.11 
   0 -10   5   -0.12    0.09 
  -1  10  -5    4.01    0.26 
   1 -10   5    4.72    0.30 
   1 -10   5    4.62    0.25 
   1 -10   5    5.23    0.35 
  -2  10  -5    2.85    0.24 
   2 -10   5    2.12    0.23 
   2 -10   5    2.55    0.29 
   2 -10   5    2.56    0.18 
  -3  10  -5   -0.13    0.11 
   3 -10   5   -0.05    0.08 
   3 -10   5   -0.01    0.12 
  -4  10  -5    3.21    0.27 
   4 -10   5    3.29    0.33 
   4 -10   5    2.56    0.24 
  -5  10  -5    2.04    0.26 
   5 -10   5    2.17    0.25 
   5 -10   5    2.02    0.32 
  -6  10  -5    3.11    0.33 
   6 -10   5    3.60    0.38 
   6 -10   5    3.18    0.28 
  -7  10  -5   -0.12    0.13 
   7 -10   5   -0.20    0.19 
   7 -10   5    0.25    0.14 
  -8  10  -5    2.55    0.34 
   8 -10   5    2.32    0.41 
   8 -10   5    2.28    0.30 
  -9  10  -5    0.95    0.27 
   9 -10   5    1.10    0.34 
   8   9  -5    0.40    0.21 
   8   9  -5    0.25    0.22 
  -8  -9   5    0.27    0.18 
  -8  -9   5    0.16    0.17 
   7   9  -5    0.35    0.18 
   7   9  -5    0.26    0.17 
  -7  -9   5    0.54    0.22 
  -7  -9   5    0.28    0.15 
   6   9  -5    0.19    0.15 
  -6  -9   5   -0.02    0.13 
  -6  -9   5    0.09    0.14 
  -6  -9   5    0.19    0.16 
   5   9  -5    0.79    0.20 
  -5  -9   5    1.14    0.19 
  -5  -9   5    1.15    0.23 
  -5  -9   5    1.07    0.22 
   4   9  -5    0.00    0.11 
  -4  -9   5    0.08    0.10 
  -4  -9   5    0.07    0.12 
  -4  -9   5    0.17    0.13 
   3   9  -5    4.30    0.30 
  -3  -9   5    4.13    0.30 
  -3  -9   5    4.29    0.25 
  -3  -9   5    4.05    0.33 
   2   9  -5    1.93    0.23 
  -2  -9   5    1.93    0.26 
  -2  -9   5    1.58    0.19 
  -2  -9   5    1.60    0.16 
   1   9  -5    3.32    0.19 
  -1  -9   5    3.12    0.28 
  -1  -9   5    3.25    0.17 
  -1  -9   5    3.82    0.27 
  -1  -9   5    3.36    0.23 
   0   9  -5    0.15    0.09 
   0  -9   5    0.14    0.05 
   0  -9   5    0.17    0.12 
   0  -9   5    0.06    0.10 
   0  -9   5    0.15    0.08 
  -1   9  -5   10.56    0.39 
   1  -9   5   10.16    0.47 
   1  -9   5   10.92    0.43 
   1  -9   5   11.05    0.37 
  -2   9  -5    0.43    0.13 
   2  -9   5    0.39    0.14 
   2  -9   5    0.22    0.10 
   2  -9   5    0.48    0.09 
  -3   9  -5    0.17    0.12 
   3  -9   5    0.02    0.09 
   3  -9   5    0.04    0.12 
   3  -9   5   -0.03    0.06 
  -4   9  -5    0.66    0.17 
   4  -9   5    0.48    0.17 
   4  -9   5    0.64    0.14 
  -5   9  -5    0.44    0.16 
   5  -9   5    0.24    0.19 
   5  -9   5    0.38    0.13 
  -6   9  -5    0.14    0.15 
   6  -9   5    0.28    0.13 
   6  -9   5    0.14    0.17 
  -7   9  -5    0.07    0.15 
   7  -9   5   -0.15    0.10 
   7  -9   5   -0.20    0.17 
  -8   9  -5    1.01    0.24 
   8  -9   5    1.34    0.24 
   8  -9   5    1.09    0.32 
  -9   9  -5    0.03    0.17 
   9  -9   5   -0.26    0.13 
   9  -9   5   -0.22    0.23 
   8   8  -5    0.75    0.24 
   8   8  -5    0.63    0.25 
  -8  -8   5    0.50    0.20 
  -8  -8   5    0.39    0.20 
   7   8  -5    0.71    0.23 
   7   8  -5    0.62    0.22 
  -7  -8   5    0.65    0.21 
  -7  -8   5    0.59    0.19 
   6   8  -5    0.79    0.21 
  -6  -8   5    1.10    0.24 
  -6  -8   5    0.50    0.16 
  -6  -8   5    0.85    0.21 
   5   8  -5    0.10    0.12 
  -5  -8   5   -0.01    0.10 
  -5  -8   5    0.07    0.10 
  -5  -8   5   -0.09    0.09 
   4   8  -5    0.36    0.14 
  -4  -8   5    0.45    0.13 
  -4  -8   5    0.10    0.10 
  -4  -8   5    0.42    0.16 
   3   8  -5    0.28    0.12 
  -3  -8   5    0.51    0.12 
  -3  -8   5    0.37    0.14 
  -3  -8   5    0.55    0.14 
   2   8  -5    1.73    0.20 
   2   8  -5    2.02    0.12 
  -2  -8   5    1.94    0.19 
  -2  -8   5    2.39    0.26 
  -2  -8   5    1.61    0.15 
   1   8  -5    0.21    0.08 
  -1  -8   5    0.34    0.10 
  -1  -8   5    0.15    0.06 
  -1  -8   5    0.18    0.10 
  -1  -8   5    0.20    0.11 
   0   8  -5    5.58    0.24 
   0  -8   5    5.68    0.29 
   0  -8   5    5.58    0.32 
   0  -8   5    5.47    0.18 
   0  -8   5    5.48    0.25 
  -1   8  -5    0.65    0.12 
   1  -8   5    0.78    0.14 
   1  -8   5    0.80    0.16 
   1  -8   5    0.79    0.10 
  -2   8  -5    7.33    0.31 
   2  -8   5    7.00    0.24 
   2  -8   5    6.96    0.36 
   2  -8   5    6.87    0.33 
  -3   8  -5    7.05    0.33 
   3  -8   5    7.57    0.40 
   3  -8   5    6.88    0.34 
   3  -8   5    7.13    0.24 
  -4   8  -5   16.46    0.57 
   4  -8   5   17.28    0.58 
   4  -8   5   17.47    0.65 
  -5   8  -5    0.25    0.13 
   5  -8   5    0.20    0.12 
   5  -8   5    0.14    0.16 
  -6   8  -5    0.25    0.15 
   6  -8   5    0.09    0.11 
   6  -8   5    0.11    0.18 
  -7   8  -5    7.87    0.45 
   7  -8   5    7.43    0.49 
   7  -8   5    6.64    0.40 
  -8   8  -5    1.64    0.27 
   8  -8   5    1.61    0.36 
   8  -8   5    1.87    0.27 
  -9   8  -5    0.00    0.16 
   9  -8   5    0.22    0.17 
   9  -8   5    0.01    0.27 
 -10   8  -5   -0.11    0.17 
  10  -8   5    0.27    0.32 
   9   7  -5    0.28    0.23 
   9   7  -5    0.18    0.17 
  -9  -7   5   -0.06    0.13 
  -9  -7   5    0.18    0.16 
   8   7  -5   -0.03    0.18 
   8   7  -5    0.03    0.17 
  -8  -7   5   -0.07    0.13 
  -8  -7   5   -0.06    0.14 
   7   7  -5    0.13    0.18 
   7   7  -5    0.12    0.15 
  -7  -7   5    0.01    0.13 
  -7  -7   5   -0.03    0.12 
   6   7  -5    1.32    0.25 
   6   7  -5    1.48    0.24 
  -6  -7   5    1.60    0.23 
  -6  -7   5    1.81    0.27 
   5   7  -5    0.37    0.14 
  -5  -7   5    0.33    0.12 
  -5  -7   5    0.09    0.12 
  -5  -7   5    0.14    0.11 
   4   7  -5   11.18    0.48 
  -4  -7   5   11.81    0.45 
  -4  -7   5   12.06    0.50 
  -4  -7   5   11.37    0.52 
   3   7  -5    9.08    0.39 
  -3  -7   5    9.12    0.43 
  -3  -7   5    9.02    0.40 
  -3  -7   5    9.00    0.36 
   2   7  -5    1.36    0.10 
   2   7  -5    1.17    0.16 
  -2  -7   5    1.56    0.17 
  -2  -7   5    1.44    0.19 
  -2  -7   5    1.25    0.13 
   1   7  -5    1.46    0.12 
  -1  -7   5    1.47    0.15 
  -1  -7   5    1.17    0.16 
  -1  -7   5    1.72    0.20 
  -1  -7   5    1.47    0.11 
   0   7  -5    1.75    0.15 
   0  -7   5    1.76    0.16 
   0  -7   5    1.95    0.19 
   0  -7   5    1.60    0.13 
   0  -7   5    1.61    0.09 
  -1   7  -5    4.16    0.22 
   1  -7   5    4.01    0.24 
   1  -7   5    4.17    0.26 
   1  -7   5    4.40    0.18 
  -2   7  -5    0.34    0.10 
   2  -7   5    0.40    0.06 
   2  -7   5    0.30    0.10 
   2  -7   5    0.59    0.14 
  -3   7  -5    3.81    0.24 
   3  -7   5    3.63    0.15 
   3  -7   5    3.92    0.24 
   3  -7   5    3.58    0.27 
  -4   7  -5    2.71    0.25 
   4  -7   5    3.19    0.24 
   4  -7   5    2.85    0.15 
   4  -7   5    3.53    0.30 
  -5   7  -5    0.26    0.14 
   5  -7   5    0.26    0.11 
   5  -7   5    0.32    0.18 
  -6   7  -5    1.86    0.23 
   6  -7   5    1.80    0.28 
   6  -7   5    1.58    0.22 
  -7   7  -5    1.87    0.25 
   7  -7   5    2.16    0.28 
   7  -7   5    1.80    0.32 
  -8   7  -5    1.78    0.26 
   8  -7   5    0.81    0.28 
   8  -7   5    1.66    0.27 
  -9   7  -5    0.21    0.16 
   9  -7   5    0.17    0.18 
   9  -7   5   -0.05    0.26 
 -10   7  -5   -0.07    0.17 
  10  -7   5   -0.18    0.26 
  10  -7   5    0.14    0.20 
   9   6  -5   -0.04    0.21 
   9   6  -5    0.41    0.18 
  -9  -6   5    0.14    0.16 
  -9  -6   5    0.07    0.15 
   8   6  -5    1.65    0.29 
   8   6  -5    1.99    0.33 
  -8  -6   5    1.04    0.23 
  -8  -6   5    1.97    0.29 
   7   6  -5    0.03    0.14 
   7   6  -5    0.13    0.15 
  -7  -6   5    0.02    0.12 
  -7  -6   5    0.08    0.13 
   6   6  -5    1.56    0.24 
   6   6  -5    1.39    0.24 
  -6  -6   5    1.27    0.22 
  -6  -6   5    1.29    0.21 
   5   6  -5   -0.10    0.10 
  -5  -6   5   -0.14    0.08 
  -5  -6   5    0.04    0.10 
  -5  -6   5    0.04    0.11 
   4   6  -5    2.44    0.22 
  -4  -6   5    2.04    0.20 
  -4  -6   5    2.17    0.26 
  -4  -6   5    1.90    0.21 
   3   6  -5    1.10    0.15 
   3   6  -5    1.02    0.07 
  -3  -6   5    0.97    0.13 
  -3  -6   5    0.97    0.16 
  -3  -6   5    0.90    0.16 
   2   6  -5    0.52    0.11 
   2   6  -5    0.71    0.07 
  -2  -6   5    0.48    0.09 
  -2  -6   5    0.79    0.14 
  -2  -6   5    0.73    0.12 
   1   6  -5   14.48    0.38 
  -1  -6   5   14.73    0.47 
  -1  -6   5   14.27    0.49 
  -1  -6   5   14.53    0.43 
  -1  -6   5   14.16    0.38 
   0   6  -5    3.45    0.18 
   0  -6   5    3.57    0.22 
   0  -6   5    3.88    0.13 
   0  -6   5    4.19    0.22 
   0  -6   5    3.65    0.17 
  -1   6  -5    1.55    0.15 
   1  -6   5    1.73    0.11 
   1  -6   5    1.94    0.16 
   1  -6   5    1.81    0.17 
  -2   6  -5    6.73    0.28 
   2  -6   5    6.90    0.31 
   2  -6   5    6.81    0.30 
   2  -6   5    7.06    0.19 
  -3   6  -5    0.15    0.03 
  -3   6  -5    0.06    0.09 
   3  -6   5   -0.03    0.08 
   3  -6   5    0.02    0.04 
   3  -6   5    0.06    0.11 
  -4   6  -5    0.53    0.07 
  -4   6  -5    0.59    0.13 
   4  -6   5    0.41    0.15 
   4  -6   5    0.48    0.13 
   4  -6   5    0.46    0.07 
  -5   6  -5    1.20    0.11 
  -5   6  -5    1.31    0.18 
   5  -6   5    1.30    0.18 
   5  -6   5    1.06    0.23 
  -6   6  -5    0.11    0.07 
  -6   6  -5    0.06    0.11 
   6  -6   5   -0.03    0.11 
   6  -6   5    0.00    0.17 
  -7   6  -5    4.65    0.33 
   7  -6   5    3.93    0.37 
   7  -6   5    4.18    0.34 
  -8   6  -5    1.33    0.22 
   8  -6   5    0.93    0.22 
   8  -6   5    1.09    0.29 
  -9   6  -5    0.16    0.16 
   9  -6   5   -0.26    0.23 
   9  -6   5    0.22    0.19 
  10  -6   5   -0.05    0.17 
  10  -6   5   -0.40    0.27 
   9   5  -5    0.11    0.17 
   9   5  -5    0.15    0.20 
  -9  -5   5    0.02    0.15 
  -9  -5   5    0.21    0.16 
   8   5  -5    0.23    0.19 
   8   5  -5    0.14    0.18 
  -8  -5   5    0.28    0.16 
  -8  -5   5    0.03    0.14 
   7   5  -5    0.87    0.20 
   7   5  -5    0.91    0.22 
  -7  -5   5    1.06    0.22 
  -7  -5   5    1.00    0.20 
   6   5  -5    0.01    0.10 
   6   5  -5    0.11    0.11 
  -6  -5   5    0.22    0.11 
  -6  -5   5   -0.02    0.11 
   5   5  -5    2.67    0.24 
  -5  -5   5    2.71    0.24 
  -5  -5   5    1.67    0.20 
  -5  -5   5    2.35    0.29 
   4   5  -5    0.62    0.13 
  -4  -5   5    0.72    0.16 
  -4  -5   5    0.22    0.09 
  -4  -5   5    0.37    0.13 
   3   5  -5    0.22    0.04 
   3   5  -5    0.15    0.08 
  -3  -5   5    0.07    0.07 
  -3  -5   5    0.11    0.09 
  -3  -5   5    0.06    0.08 
   2   5  -5    0.52    0.06 
  -2  -5   5    0.53    0.08 
  -2  -5   5    0.62    0.12 
  -2  -5   5    0.50    0.10 
  -2  -5   5    0.57    0.11 
   1   5  -5    9.03    0.27 
  -1  -5   5    9.54    0.31 
  -1  -5   5    9.19    0.27 
  -1  -5   5    9.17    0.33 
  -1  -5   5    9.88    0.35 
   0   5  -5    1.25    0.11 
   0  -5   5    1.45    0.08 
   0  -5   5    1.24    0.13 
   0  -5   5    1.41    0.14 
   0  -5   5    1.59    0.10 
  -1   5  -5    1.73    0.14 
   1  -5   5    1.95    0.15 
   1  -5   5    1.98    0.09 
   1  -5   5    1.77    0.16 
  -2   5  -5    0.01    0.07 
   2  -5   5    0.03    0.09 
   2  -5   5    0.08    0.07 
  -3   5  -5   18.02    0.41 
  -3   5  -5   17.39    0.52 
   3  -5   5   17.21    0.38 
   3  -5   5   18.07    0.55 
   3  -5   5   17.82    0.53 
  -4   5  -5    8.95    0.28 
  -4   5  -5    9.80    0.36 
   4  -5   5    8.81    0.40 
   4  -5   5    8.96    0.25 
   4  -5   5    9.05    0.38 
  -5   5  -5    2.75    0.24 
  -5   5  -5    3.41    0.18 
   5  -5   5    3.25    0.26 
   5  -5   5    3.26    0.16 
   5  -5   5    3.61    0.31 
  -6   5  -5   16.85    0.52 
  -6   5  -5   16.52    0.58 
   6  -5   5   17.89    0.66 
   6  -5   5   17.16    0.62 
  -7   5  -5    5.89    0.30 
  -7   5  -5    6.28    0.36 
   7  -5   5    6.21    0.40 
   7  -5   5    5.38    0.41 
  -8   5  -5    2.05    0.25 
  -8   5  -5    2.14    0.23 
   8  -5   5    1.98    0.33 
   8  -5   5    2.79    0.33 
  -9   5  -5    0.75    0.20 
   9  -5   5    0.65    0.30 
   9  -5   5    0.53    0.23 
  10  -5   5    0.00    0.20 
  10  -5   5   -0.09    0.26 
  10   4  -5   -0.20    0.24 
  10   4  -5    0.69    0.28 
 -10  -4   5   -0.15    0.23 
 -10  -4   5    0.19    0.18 
   9   4  -5    1.04    0.29 
   9   4  -5    1.05    0.28 
  -9  -4   5    0.75    0.22 
  -9  -4   5    1.04    0.24 
   8   4  -5   -0.04    0.12 
   8   4  -5   -0.01    0.17 
  -8  -4   5    0.01    0.14 
  -8  -4   5    0.09    0.14 
   7   4  -5    0.12    0.15 
   7   4  -5   -0.08    0.13 
  -7  -4   5    0.20    0.12 
  -7  -4   5    0.15    0.13 
   6   4  -5    0.18    0.12 
   6   4  -5    0.38    0.13 
  -6  -4   5    0.37    0.13 
  -6  -4   5    0.23    0.11 
   5   4  -5    3.89    0.29 
   5   4  -5    4.65    0.29 
  -5  -4   5    4.00    0.28 
  -5  -4   5    4.10    0.27 
   4   4  -5    1.30    0.16 
  -4  -4   5    1.00    0.16 
  -4  -4   5    1.08    0.08 
  -4  -4   5    1.23    0.18 
  -4  -4   5    0.86    0.13 
   3   4  -5    7.85    0.31 
  -3  -4   5    7.86    0.33 
  -3  -4   5    7.77    0.30 
  -3  -4   5    7.11    0.33 
  -3  -4   5    7.91    0.22 
  -2  -4   5    6.04    0.25 
  -2  -4   5    6.11    0.23 
  -2  -4   5    5.79    0.27 
  -2  -4   5    6.04    0.25 
  -2  -4   5    6.06    0.19 
   1   4  -5    3.73    0.15 
  -1  -4   5    3.76    0.15 
  -1  -4   5    3.87    0.19 
  -1  -4   5    3.86    0.18 
  -1  -4   5    3.73    0.17 
   0   4  -5   12.31    0.34 
   0  -4   5   12.30    0.37 
   0  -4   5   12.82    0.37 
   0  -4   5   12.52    0.30 
   0  -4   5   12.57    0.32 
  -1   4  -5    2.97    0.16 
  -1   4  -5    3.66    0.11 
   1  -4   5    3.49    0.19 
   1  -4   5    3.34    0.17 
   1  -4   5    3.44    0.10 
  -2   4  -5    7.39    0.19 
  -2   4  -5    6.84    0.26 
   2  -4   5    6.74    0.28 
   2  -4   5    7.04    0.28 
  -3   4  -5   29.32    0.64 
  -3   4  -5   28.43    0.71 
   3  -4   5   29.02    0.59 
   3  -4   5   28.11    0.74 
   3  -4   5   28.09    0.74 
  -4   4  -5    8.10    0.27 
  -4   4  -5    7.82    0.23 
  -4   4  -5    7.70    0.31 
   4  -4   5    7.79    0.35 
   4  -4   5    7.65    0.35 
  -5   4  -5    0.91    0.12 
  -5   4  -5    0.87    0.10 
  -5   4  -5    0.92    0.15 
   5  -4   5    0.72    0.19 
   5  -4   5    0.70    0.16 
  -6   4  -5    0.00    0.07 
  -6   4  -5    0.29    0.12 
  -6   4  -5    0.06    0.07 
   6  -4   5    0.17    0.18 
   6  -4   5   -0.01    0.13 
  -7   4  -5    2.83    0.23 
  -7   4  -5    2.93    0.25 
   7  -4   5    3.36    0.32 
   7  -4   5    3.02    0.34 
  -8   4  -5    0.93    0.17 
  -8   4  -5    0.74    0.17 
   8  -4   5    0.61    0.21 
   8  -4   5    0.87    0.26 
  -9   4  -5    0.10    0.12 
   9  -4   5    0.38    0.22 
   9  -4   5   -0.12    0.23 
  10  -4   5   -0.40    0.26 
  10  -4   5   -0.43    0.17 
  10   3  -5    2.12    0.37 
  10   3  -5    1.30    0.32 
 -10  -3   5    1.36    0.25 
 -10  -3   5    1.04    0.26 
   9   3  -5   -0.03    0.20 
   9   3  -5    0.17    0.18 
  -9  -3   5    0.06    0.13 
  -9  -3   5   -0.03    0.14 
   8   3  -5    0.34    0.20 
   8   3  -5    0.15    0.18 
  -8  -3   5    0.31    0.17 
  -8  -3   5    0.43    0.16 
   7   3  -5    0.99    0.20 
   7   3  -5    0.69    0.21 
  -7  -3   5    0.74    0.16 
  -7  -3   5    1.00    0.21 
   6   3  -5    1.16    0.22 
   6   3  -5    1.31    0.19 
  -6  -3   5    1.43    0.20 
  -6  -3   5    1.45    0.21 
   5   3  -5    0.23    0.11 
   5   3  -5    0.15    0.11 
  -5  -3   5    0.06    0.09 
  -5  -3   5    0.18    0.06 
  -5  -3   5    0.06    0.11 
   4   3  -5    0.13    0.10 
   4   3  -5    0.14    0.08 
  -4  -3   5    0.10    0.09 
  -4  -3   5    0.17    0.05 
  -4  -3   5    0.15    0.08 
   3   3  -5    3.58    0.19 
  -3  -3   5    3.70    0.22 
  -3  -3   5    3.65    0.20 
  -3  -3   5    3.88    0.21 
  -3  -3   5    3.83    0.15 
   2   3  -5   24.28    0.59 
  -2  -3   5   22.92    0.63 
  -2  -3   5   23.83    0.58 
  -2  -3   5   23.68    0.54 
  -2  -3   5   24.46    0.61 
  -1  -3   5   18.31    0.44 
  -1  -3   5   18.73    0.47 
  -1  -3   5   18.84    0.47 
  -1  -3   5   18.34    0.45 
  -1  -3   5   19.61    0.50 
   0  -3   5   22.79    0.55 
   0  -3   5   23.17    0.53 
   0  -3   5   22.51    0.50 
   0  -3   5   23.05    0.50 
   0  -3   5   22.10    0.54 
  -1   3  -5    0.14    0.06 
  -1   3  -5    0.14    0.05 
   1  -3   5    0.09    0.06 
   1  -3   5    0.07    0.06 
  -2   3  -5    6.36    0.23 
  -2   3  -5    6.44    0.20 
   2  -3   5    5.99    0.25 
   2  -3   5    6.42    0.24 
  -3   3  -5   16.22    0.37 
  -3   3  -5   15.99    0.41 
  -3   3  -5   15.67    0.45 
   3  -3   5   16.15    0.47 
   3  -3   5   15.67    0.48 
  -4   3  -5    2.53    0.17 
  -4   3  -5    2.33    0.13 
  -4   3  -5    2.21    0.15 
   4  -3   5    2.26    0.21 
   4  -3   5    2.18    0.21 
  -5   3  -5    3.49    0.23 
  -5   3  -5    3.53    0.18 
  -5   3  -5    3.57    0.20 
   5  -3   5    3.64    0.28 
   5  -3   5    3.65    0.28 
  -6   3  -5   14.53    0.49 
  -6   3  -5   13.87    0.44 
  -6   3  -5   13.51    0.47 
   6  -3   5   13.26    0.55 
   6  -3   5   14.88    0.57 
  -7   3  -5   -0.10    0.06 
  -7   3  -5   -0.05    0.10 
  -7   3  -5    0.04    0.08 
   7  -3   5    0.03    0.14 
   7  -3   5   -0.24    0.16 
  -8   3  -5    0.02    0.11 
  -8   3  -5    0.21    0.11 
   8  -3   5   -0.12    0.19 
   8  -3   5    0.05    0.18 
  -9   3  -5    0.89    0.18 
   9  -3   5    0.99    0.30 
   9  -3   5    0.85    0.27 
 -10   3  -5    0.04    0.12 
  10  -3   5   -0.11    0.20 
  10  -3   5   -0.24    0.26 
  10   2  -5    0.99    0.29 
 -10  -2   5    0.56    0.19 
 -10  -2   5    0.53    0.20 
   9   2  -5   -0.13    0.19 
   9   2  -5    0.11    0.20 
  -9  -2   5   -0.09    0.13 
  -9  -2   5    0.19    0.16 
   8   2  -5    0.12    0.17 
   8   2  -5    0.12    0.16 
  -8  -2   5    0.12    0.14 
  -8  -2   5    0.01    0.13 
   7   2  -5    3.29    0.29 
   7   2  -5    3.11    0.31 
  -7  -2   5    3.13    0.28 
  -7  -2   5    3.20    0.30 
   6   2  -5    0.05    0.11 
   6   2  -5   -0.04    0.11 
  -6  -2   5   -0.02    0.05 
  -6  -2   5   -0.01    0.09 
  -6  -2   5   -0.04    0.09 
   5   2  -5    0.04    0.10 
   5   2  -5    0.12    0.12 
  -5  -2   5    0.01    0.08 
  -5  -2   5    0.07    0.10 
  -5  -2   5    0.08    0.05 
   4   2  -5    0.00    0.06 
   4   2  -5   -0.04    0.07 
  -4  -2   5    0.11    0.08 
  -4  -2   5    0.01    0.06 
  -4  -2   5   -0.01    0.04 
   3   2  -5    0.68    0.12 
   3   2  -5    0.92    0.11 
  -3  -2   5    0.79    0.11 
  -3  -2   5    0.85    0.08 
  -3  -2   5    0.59    0.10 
   2   2  -5   19.77    0.48 
  -2  -2   5   19.72    0.47 
  -2  -2   5   19.61    0.50 
  -2  -2   5   20.06    0.53 
  -1  -2   5    0.33    0.07 
  -1  -2   5    0.37    0.07 
  -1  -2   5    0.31    0.06 
  -1  -2   5    0.36    0.06 
  -1  -2   5    0.25    0.05 
   0   2  -5    2.35    0.11 
   0  -2   5    2.53    0.13 
   0  -2   5    2.44    0.13 
   0  -2   5    2.36    0.10 
   0  -2   5    2.36    0.11 
  -1   2  -5    3.15    0.14 
  -1   2  -5    2.66    0.14 
  -1   2  -5    3.03    0.11 
   1  -2   5    2.83    0.16 
   1  -2   5    3.07    0.13 
  -2   2  -5   24.93    0.58 
  -2   2  -5   25.23    0.54 
  -2   2  -5   25.94    0.61 
   2  -2   5   25.64    0.63 
   2  -2   5   24.75    0.59 
  -3   2  -5    0.80    0.08 
  -3   2  -5    0.77    0.09 
  -3   2  -5    0.87    0.11 
   3  -2   5    0.77    0.13 
   3  -2   5    0.81    0.12 
  -4   2  -5    3.40    0.19 
  -4   2  -5    3.28    0.19 
  -4   2  -5    3.45    0.16 
   4  -2   5    3.41    0.24 
   4  -2   5    3.01    0.22 
  -5   2  -5   19.44    0.54 
  -5   2  -5   18.62    0.55 
  -5   2  -5   19.72    0.57 
   5  -2   5   20.33    0.65 
   5  -2   5   20.32    0.63 
  -6   2  -5    3.67    0.22 
  -6   2  -5    3.06    0.23 
  -6   2  -5    3.24    0.22 
   6  -2   5    3.36    0.30 
   6  -2   5    3.25    0.32 
  -7   2  -5    0.83    0.15 
  -7   2  -5    0.67    0.13 
  -7   2  -5    0.61    0.14 
   7  -2   5    0.97    0.23 
   7  -2   5    0.36    0.17 
  -8   2  -5    5.72    0.36 
   8  -2   5    5.73    0.42 
   8  -2   5    6.20    0.46 
  -9   2  -5    8.54    0.47 
   9  -2   5    7.93    0.54 
   9  -2   5    6.93    0.56 
 -10   2  -5    2.38    0.31 
  10  -2   5    1.92    0.36 
  10  -2   5    1.61    0.37 
  10   1  -5    0.61    0.26 
 -10  -1   5    0.84    0.21 
 -10  -1   5    0.61    0.21 
   9   1  -5    0.52    0.24 
   9   1  -5    0.21    0.20 
  -9  -1   5    0.63    0.20 
  -9  -1   5    0.51    0.18 
   8   1  -5    0.51    0.19 
   8   1  -5    0.70    0.24 
  -8  -1   5    0.65    0.18 
  -8  -1   5    0.82    0.20 
   7   1  -5    0.24    0.16 
   7   1  -5   -0.01    0.12 
  -7  -1   5    0.08    0.07 
  -7  -1   5    0.12    0.11 
  -7  -1   5    0.09    0.10 
   6   1  -5    5.12    0.30 
   6   1  -5    4.67    0.34 
  -6  -1   5    4.64    0.30 
  -6  -1   5    4.61    0.23 
  -6  -1   5    5.23    0.31 
   5   1  -5    1.39    0.16 
   5   1  -5    0.86    0.17 
  -5  -1   5    1.56    0.20 
  -5  -1   5    1.21    0.12 
  -5  -1   5    0.88    0.15 
   4   1  -5   -0.09    0.06 
   4   1  -5    0.07    0.08 
  -4  -1   5    0.07    0.05 
  -4  -1   5    0.00    0.07 
  -4  -1   5    0.02    0.07 
   3   1  -5    0.28    0.07 
   3   1  -5    0.26    0.09 
  -3  -1   5    0.18    0.05 
  -3  -1   5    0.27    0.08 
  -3  -1   5    0.28    0.09 
   2   1  -5    1.71    0.13 
   2   1  -5    1.44    0.09 
  -2  -1   5    1.43    0.12 
  -2  -1   5    1.49    0.11 
  -2  -1   5    1.54    0.12 
   1   1  -5    0.82    0.08 
  -1  -1   5    0.69    0.08 
  -1  -1   5    0.83    0.08 
  -1  -1   5    0.84    0.08 
  -1  -1   5    0.81    0.07 
   0   1  -5   -0.10    0.04 
   0   1  -5   -0.04    0.05 
   0  -1   5   -0.02    0.04 
   0  -1   5    0.02    0.02 
   0  -1   5   -0.01    0.04 
  -1   1  -5    0.47    0.07 
  -1   1  -5    0.37    0.07 
   1  -1   5    0.47    0.05 
   1  -1   5    0.38    0.08 
   1  -1   5    0.38    0.07 
  -2   1  -5    3.81    0.17 
  -2   1  -5    3.97    0.18 
  -2   1  -5    3.90    0.15 
   2  -1   5    3.52    0.16 
   2  -1   5    3.98    0.20 
  -3   1  -5    5.44    0.21 
  -3   1  -5    5.47    0.20 
  -3   1  -5    5.28    0.23 
   3  -1   5    5.63    0.26 
   3  -1   5    5.43    0.23 
  -4   1  -5    1.75    0.13 
  -4   1  -5    1.69    0.14 
  -4   1  -5    1.59    0.15 
   4  -1   5    1.50    0.18 
   4  -1   5    1.79    0.17 
  -5   1  -5    0.14    0.07 
  -5   1  -5    0.32    0.09 
  -5   1  -5    0.13    0.08 
   5  -1   5    0.10    0.11 
   5  -1   5    0.42    0.16 
  -6   1  -5    3.97    0.23 
  -6   1  -5    4.30    0.24 
  -6   1  -5    3.89    0.26 
   6  -1   5    4.19    0.31 
   6  -1   5    3.95    0.34 
  -7   1  -5    1.61    0.20 
  -7   1  -5    1.45    0.20 
  -7   1  -5    1.76    0.18 
   7  -1   5    1.96    0.27 
   7  -1   5    1.34    0.25 
  -8   1  -5    1.05    0.20 
  -8   1  -5    1.18    0.19 
   8  -1   5    0.96    0.25 
   8  -1   5    0.83    0.23 
  -9   1  -5    0.00    0.12 
   9  -1   5   -0.20    0.21 
   9  -1   5    0.06    0.22 
 -10   1  -5    0.05    0.14 
  10  -1   5    0.25    0.26 
  10  -1   5   -0.01    0.23 
  10   0  -5    0.66    0.30 
 -10   0   5    0.45    0.18 
 -10   0   5    0.39    0.20 
   9   0  -5    0.04    0.22 
  -9   0   5    0.21    0.16 
  -9   0   5    0.13    0.12 
   8   0  -5    0.11    0.16 
   8   0  -5    0.10    0.17 
  -8   0   5    0.03    0.12 
  -8   0   5    0.02    0.11 
   7   0  -5    0.36    0.19 
   7   0  -5    0.51    0.16 
  -7   0   5    0.30    0.13 
  -7   0   5    0.48    0.14 
  -7   0   5    0.65    0.12 
   6   0  -5    1.12    0.21 
   6   0  -5    0.97    0.16 
  -6   0   5    1.07    0.14 
  -6   0   5    0.55    0.14 
  -6   0   5    0.79    0.16 
   5   0  -5    5.80    0.26 
   5   0  -5    5.02    0.33 
  -5   0   5    5.61    0.25 
  -5   0   5    5.34    0.30 
  -5   0   5    5.87    0.30 
   4   0  -5    0.52    0.12 
   4   0  -5    0.51    0.09 
  -4   0   5    0.46    0.09 
  -4   0   5    0.61    0.11 
  -4   0   5    0.75    0.13 
   3   0  -5   25.93    0.59 
   3   0  -5   26.74    0.69 
  -3   0   5   26.30    0.68 
  -3   0   5   26.01    0.66 
  -3   0   5   25.51    0.62 
   2   0  -5   13.86    0.40 
   2   0  -5   14.05    0.32 
  -2   0   5   14.35    0.41 
  -2   0   5   14.07    0.39 
  -2   0   5   14.46    0.38 
   1   0  -5    1.69    0.13 
   1   0  -5    1.45    0.10 
  -1   0   5    1.47    0.11 
  -1   0   5    1.50    0.06 
  -1   0   5    1.49    0.11 
   0   0  -5   13.26    0.36 
   0   0  -5   13.65    0.29 
   0   0  -5   13.02    0.36 
   0   0  -5   13.72    0.29 
   0   0   5   13.24    0.35 
   0   0   5   13.71    0.32 
  -1   0  -5    0.54    0.10 
  -1   0  -5    0.47    0.08 
   1   0   5    0.41    0.04 
   1   0   5    0.51    0.07 
   1   0   5    0.56    0.09 
   1   0   5    0.54    0.04 
  -2   0  -5    8.68    0.25 
  -2   0  -5    8.21    0.26 
  -2   0  -5    8.03    0.28 
   2   0   5    8.36    0.30 
   2   0   5    8.26    0.24 
  -3   0  -5    1.26    0.13 
  -3   0  -5    1.34    0.12 
  -3   0  -5    1.17    0.11 
   3   0   5    1.10    0.14 
   3   0   5    1.47    0.12 
  -4   0  -5   14.36    0.46 
  -4   0  -5   13.98    0.39 
  -4   0  -5   14.00    0.43 
   4   0   5   14.02    0.44 
   4   0   5   13.26    0.48 
  -5   0  -5   28.04    0.68 
  -5   0  -5   28.91    0.75 
  -5   0  -5   27.81    0.77 
   5   0   5   25.54    0.79 
   5   0   5   26.50    0.76 
  -6   0  -5    0.00    0.08 
  -6   0  -5   -0.01    0.07 
  -6   0  -5    0.09    0.08 
   6   0   5   -0.20    0.12 
   6   0   5    0.04    0.12 
  -7   0  -5   -0.17    0.07 
  -7   0  -5    0.02    0.08 
   7   0   5    0.14    0.15 
   7   0   5   -0.12    0.16 
  -8   0  -5   13.13    0.57 
  -8   0  -5   12.55    0.54 
   8   0   5   13.20    0.62 
   8   0   5   11.48    0.61 
  -9   0  -5    3.85    0.35 
   9   0   5    3.45    0.41 
   9   0   5    3.08    0.43 
 -10   0  -5    0.79    0.22 
  10   0   5    0.67    0.30 
  10  -1  -5    1.32    0.24 
  10  -1  -5    0.88    0.35 
 -10   1   5    0.55    0.18 
   9  -1  -5    0.47    0.27 
  -9   1   5    0.84    0.19 
  -9   1   5    1.13    0.24 
   8  -1  -5   -0.13    0.19 
   8  -1  -5    0.12    0.15 
  -8   1   5    0.08    0.12 
  -8   1   5    0.06    0.13 
  -8   1   5    0.22    0.10 
   7  -1  -5    1.25    0.25 
   7  -1  -5    1.19    0.19 
  -7   1   5    1.36    0.17 
  -7   1   5    1.55    0.23 
  -7   1   5    1.18    0.18 
   6  -1  -5    0.08    0.11 
   6  -1  -5   -0.11    0.12 
  -6   1   5   -0.04    0.09 
  -6   1   5   -0.03    0.09 
  -6   1   5   -0.01    0.07 
   5  -1  -5    0.39    0.15 
   5  -1  -5    0.26    0.10 
  -5   1   5    0.30    0.10 
  -5   1   5    0.21    0.08 
  -5   1   5    0.31    0.11 
   4  -1  -5   -0.12    0.08 
   4  -1  -5    0.08    0.07 
  -4   1   5    0.10    0.08 
  -4   1   5   -0.04    0.06 
  -4   1   5   -0.03    0.07 
   3  -1  -5   41.62    1.00 
   3  -1  -5   41.75    0.99 
   3  -1  -5   41.93    0.88 
  -3   1   5   43.54    0.96 
  -3   1   5   40.90    0.97 
   2  -1  -5    9.77    0.33 
   2  -1  -5   10.08    0.33 
  -2   1   5   10.35    0.31 
  -2   1   5    9.70    0.31 
   1  -1  -5    0.00    0.08 
   1  -1  -5    0.13    0.07 
   1  -1  -5    0.10    0.07 
  -1   1   5    0.12    0.06 
   0  -1  -5    1.88    0.14 
   0  -1  -5    1.98    0.16 
   0  -1  -5    2.02    0.09 
   0   1   5    1.99    0.12 
   0   1   5    2.07    0.11 
  -1  -1  -5   16.00    0.44 
  -1  -1  -5   15.93    0.36 
  -1  -1  -5   15.93    0.43 
   1   1   5   15.52    0.39 
   1   1   5   15.62    0.42 
  -2  -1  -5   18.90    0.51 
  -2  -1  -5   19.66    0.52 
   2   1   5   19.53    0.47 
   2   1   5   19.37    0.53 
   2   1   5   18.50    0.46 
  -3  -1  -5   14.06    0.42 
  -3  -1  -5   13.36    0.36 
  -3  -1  -5   13.49    0.43 
   3   1   5   13.67    0.40 
   3   1   5   13.38    0.45 
  -4  -1  -5   15.83    0.50 
  -4  -1  -5   15.89    0.51 
  -4  -1  -5   16.52    0.43 
   4   1   5   16.63    0.50 
   4   1   5   16.28    0.54 
  -5  -1  -5    1.11    0.11 
  -5  -1  -5    0.91    0.14 
  -5  -1  -5    0.94    0.15 
   5   1   5    1.18    0.21 
   5   1   5    0.88    0.15 
  -6  -1  -5    0.26    0.12 
  -6  -1  -5    0.29    0.11 
   6   1   5    0.52    0.15 
   6   1   5    0.35    0.17 
  -7  -1  -5    0.10    0.12 
  -7  -1  -5    0.09    0.09 
   7   1   5    0.25    0.15 
   7   1   5    0.15    0.19 
  -8  -1  -5    1.03    0.20 
  -8  -1  -5    1.21    0.22 
   8   1   5    1.28    0.24 
   8   1   5    0.49    0.24 
  -9  -1  -5    0.60    0.19 
  -9  -1  -5    0.32    0.17 
   9   1   5   -0.12    0.23 
   9   1   5    0.53    0.23 
 -10  -1  -5    1.32    0.27 
  10   1   5    0.89    0.33 
  10  -2  -5    0.34    0.15 
  10  -2  -5    0.44    0.31 
 -10   2   5    0.36    0.16 
   9  -2  -5    0.32    0.28 
   9  -2  -5    0.32    0.15 
  -9   2   5    0.15    0.14 
   8  -2  -5    0.16    0.13 
   8  -2  -5    0.38    0.22 
  -8   2   5    0.04    0.11 
  -8   2   5    0.07    0.10 
   7  -2  -5    1.62    0.22 
   7  -2  -5    1.97    0.31 
   7  -2  -5    2.20    0.22 
  -7   2   5    2.46    0.22 
  -7   2   5    1.97    0.24 
   6  -2  -5    0.94    0.15 
   6  -2  -5    1.11    0.18 
   6  -2  -5    0.93    0.22 
  -6   2   5    1.12    0.16 
  -6   2   5    1.16    0.16 
   5  -2  -5    0.84    0.15 
   5  -2  -5    0.97    0.12 
   5  -2  -5    0.60    0.18 
  -5   2   5    0.59    0.11 
  -5   2   5    0.83    0.14 
   4  -2  -5    1.14    0.19 
   4  -2  -5    0.75    0.13 
   4  -2  -5    1.22    0.11 
  -4   2   5    0.71    0.11 
  -4   2   5    0.99    0.13 
   3  -2  -5    1.92    0.09 
   3  -2  -5    1.87    0.17 
   3  -2  -5    1.97    0.20 
  -3   2   5    1.80    0.14 
  -3   2   5    1.87    0.15 
   2  -2  -5    2.46    0.19 
   2  -2  -5    1.80    0.16 
  -2   2   5    2.24    0.14 
  -2   2   5    2.13    0.14 
   1  -2  -5    0.12    0.08 
   1  -2  -5    0.24    0.08 
   1  -2  -5    0.14    0.09 
  -1   2   5    0.25    0.07 
  -1   2   5    0.25    0.04 
   0  -2  -5   18.36    0.43 
   0  -2  -5   17.19    0.49 
   0  -2  -5   17.09    0.47 
   0   2   5   17.65    0.42 
   0   2   5   17.53    0.45 
  -1  -2  -5    2.84    0.19 
  -1  -2  -5    3.02    0.13 
  -1  -2  -5    3.05    0.19 
   1   2   5    2.92    0.16 
   1   2   5    2.93    0.14 
  -2  -2  -5    3.99    0.21 
  -2  -2  -5    3.87    0.21 
  -2  -2  -5    3.82    0.17 
   2   2   5    4.08    0.16 
   2   2   5    4.15    0.22 
  -3  -2  -5    6.16    0.28 
  -3  -2  -5    6.59    0.29 
  -3  -2  -5    6.64    0.21 
   3   2   5    6.80    0.32 
   3   2   5    6.28    0.25 
  -4  -2  -5   15.98    0.53 
  -4  -2  -5   16.33    0.41 
  -4  -2  -5   15.76    0.52 
   4   2   5   16.72    0.51 
   4   2   5   16.67    0.57 
  -5  -2  -5    0.42    0.13 
  -5  -2  -5    0.60    0.13 
   5   2   5    0.42    0.12 
   5   2   5    0.30    0.17 
  -6  -2  -5    0.03    0.10 
  -6  -2  -5    0.14    0.10 
   6   2   5    0.29    0.19 
   6   2   5    0.20    0.12 
  -7  -2  -5   -0.03    0.10 
  -7  -2  -5    0.18    0.11 
   7   2   5    0.24    0.15 
   7   2   5   -0.22    0.17 
  -8  -2  -5   -0.08    0.10 
  -8  -2  -5    0.02    0.13 
   8   2   5    0.24    0.17 
   8   2   5    0.03    0.23 
  -9  -2  -5    0.45    0.18 
  -9  -2  -5    1.01    0.22 
   9   2   5    0.70    0.30 
  10  -3  -5    0.51    0.17 
  10  -3  -5    0.09    0.30 
 -10   3   5   -0.04    0.12 
   9  -3  -5    0.53    0.17 
   9  -3  -5    0.13    0.24 
  -9   3   5    0.00    0.12 
  -9   3   5    0.20    0.14 
   8  -3  -5    0.17    0.13 
   8  -3  -5   -0.05    0.22 
  -8   3   5    0.04    0.11 
  -8   3   5   -0.02    0.10 
   7  -3  -5    0.12    0.12 
   7  -3  -5    0.05    0.20 
  -7   3   5    0.01    0.10 
  -7   3   5    0.13    0.11 
   6  -3  -5    0.65    0.15 
   6  -3  -5    0.62    0.12 
   6  -3  -5    0.57    0.20 
  -6   3   5    0.56    0.13 
  -6   3   5    0.76    0.14 
   5  -3  -5    0.45    0.17 
   5  -3  -5    0.47    0.09 
   5  -3  -5    0.43    0.12 
  -5   3   5    0.43    0.11 
  -5   3   5    0.35    0.11 
   4  -3  -5    1.01    0.16 
   4  -3  -5    1.05    0.18 
   4  -3  -5    1.17    0.09 
  -4   3   5    0.94    0.13 
  -4   3   5    0.99    0.14 
   3  -3  -5   38.27    0.95 
   3  -3  -5   39.94    0.79 
   3  -3  -5   38.33    0.96 
  -3   3   5   37.32    0.92 
  -3   3   5   38.93    0.91 
   2  -3  -5    1.09    0.14 
   2  -3  -5    1.14    0.12 
   2  -3  -5    1.27    0.14 
  -2   3   5    1.18    0.13 
   1  -3  -5   -0.06    0.10 
   1  -3  -5   -0.12    0.07 
   1  -3  -5    0.08    0.08 
  -1   3   5    0.05    0.06 
  -1   3   5   -0.04    0.03 
   0  -3  -5    3.07    0.16 
   0  -3  -5    3.24    0.24 
   0  -3  -5    2.76    0.20 
   0   3   5    3.07    0.15 
   0   3   5    3.08    0.15 
  -1  -3  -5    0.05    0.05 
  -1  -3  -5    0.00    0.09 
  -1  -3  -5    0.14    0.09 
   1   3   5   -0.08    0.06 
   1   3   5   -0.02    0.04 
  -2  -3  -5    7.06    0.30 
  -2  -3  -5    7.06    0.26 
  -2  -3  -5    6.52    0.29 
   2   3   5    7.21    0.30 
   2   3   5    7.15    0.22 
  -3  -3  -5    0.76    0.11 
  -3  -3  -5    0.78    0.08 
  -3  -3  -5    0.89    0.14 
  -3  -3  -5    0.69    0.13 
   3   3   5    0.54    0.14 
  -4  -3  -5    9.61    0.41 
  -4  -3  -5    9.96    0.27 
  -4  -3  -5   10.03    0.41 
   4   3   5    9.09    0.42 
   4   3   5   10.18    0.39 
  -5  -3  -5    0.31    0.13 
  -5  -3  -5    0.03    0.09 
   5   3   5    0.09    0.10 
   5   3   5    0.01    0.16 
  -6  -3  -5    0.00    0.12 
  -6  -3  -5    0.06    0.10 
   6   3   5    0.01    0.10 
   6   3   5    0.13    0.18 
  -7  -3  -5    5.58    0.38 
  -7  -3  -5    4.83    0.35 
   7   3   5    4.99    0.36 
   7   3   5    4.97    0.45 
  -8  -3  -5    1.22    0.23 
  -8  -3  -5    0.81    0.20 
   8   3   5    0.71    0.27 
   8   3   5    1.16    0.24 
  -9  -3  -5    0.54    0.18 
  -9  -3  -5    0.72    0.22 
   9   3   5    0.34    0.27 
  10  -4  -5    0.16    0.28 
  10  -4  -5    0.31    0.16 
 -10   4   5   -0.02    0.13 
   9  -4  -5    0.16    0.29 
   9  -4  -5    0.11    0.14 
  -9   4   5    0.12    0.13 
  -9   4   5   -0.19    0.11 
   8  -4  -5    0.87    0.19 
   8  -4  -5    0.75    0.29 
  -8   4   5    0.59    0.16 
  -8   4   5    1.22    0.20 
   7  -4  -5   -0.13    0.20 
   7  -4  -5    0.04    0.11 
  -7   4   5   -0.01    0.10 
  -7   4   5    0.10    0.11 
   6  -4  -5    0.68    0.14 
   6  -4  -5    0.52    0.20 
  -6   4   5    0.78    0.15 
  -6   4   5    0.80    0.15 
   5  -4  -5    6.40    0.41 
   5  -4  -5    6.65    0.23 
   5  -4  -5    6.41    0.33 
  -5   4   5    6.82    0.31 
  -5   4   5    6.09    0.31 
   4  -4  -5   -0.03    0.15 
   4  -4  -5   -0.03    0.04 
   4  -4  -5   -0.02    0.10 
  -4   4   5   -0.07    0.08 
  -4   4   5   -0.05    0.07 
   3  -4  -5    0.41    0.14 
   3  -4  -5    0.14    0.07 
   3  -4  -5    0.15    0.10 
   3  -4  -5    0.25    0.04 
  -3   4   5    0.13    0.09 
   2  -4  -5   10.71    0.41 
   2  -4  -5   10.64    0.39 
   2  -4  -5   10.84    0.36 
  -2   4   5   10.60    0.26 
  -2   4   5   10.52    0.36 
   1  -4  -5    2.05    0.17 
   1  -4  -5    2.17    0.20 
   1  -4  -5    2.17    0.17 
  -1   4   5    2.08    0.11 
  -1   4   5    1.63    0.13 
   0  -4  -5    0.27    0.11 
   0  -4  -5    0.32    0.08 
   0  -4  -5    0.32    0.10 
   0   4   5    0.27    0.07 
   0   4   5    0.34    0.07 
  -1  -4  -5    9.49    0.38 
  -1  -4  -5    9.50    0.36 
  -1  -4  -5    9.85    0.33 
   1   4   5    9.84    0.29 
   1   4   5    9.61    0.33 
  -2  -4  -5    4.08    0.21 
  -2  -4  -5    4.07    0.26 
  -2  -4  -5    4.26    0.26 
   2   4   5    4.36    0.25 
   2   4   5    4.55    0.17 
  -3  -4  -5    2.41    0.22 
  -3  -4  -5    1.90    0.16 
  -3  -4  -5    2.42    0.23 
   3   4   5    2.02    0.21 
  -4  -4  -5    4.11    0.26 
  -4  -4  -5    4.44    0.29 
  -4  -4  -5    4.12    0.28 
   4   4   5    4.43    0.31 
  -5  -4  -5    0.02    0.11 
  -5  -4  -5    0.10    0.11 
   5   4   5    0.15    0.15 
   5   4   5    0.29    0.11 
  -6  -4  -5    0.78    0.17 
  -6  -4  -5    0.83    0.17 
   6   4   5    0.92    0.18 
   6   4   5    0.51    0.20 
  -7  -4  -5    1.41    0.23 
  -7  -4  -5    1.26    0.22 
   7   4   5    1.57    0.25 
   7   4   5    1.55    0.29 
  -8  -4  -5    0.32    0.16 
  -8  -4  -5    0.25    0.15 
   8   4   5    0.22    0.24 
  -9  -4  -5    0.11    0.16 
  -9  -4  -5    0.04    0.16 
   9   4   5   -0.08    0.25 
  10  -5  -5   -0.33    0.28 
 -10   5   5    0.23    0.16 
 -10   5   5   -0.03    0.14 
   9  -5  -5    0.46    0.31 
   9  -5  -5    0.62    0.19 
  -9   5   5    0.49    0.16 
  -9   5   5    0.36    0.17 
   8  -5  -5    0.33    0.24 
   8  -5  -5    0.17    0.14 
  -8   5   5    0.03    0.13 
  -8   5   5    0.08    0.12 
   7  -5  -5    0.80    0.25 
   7  -5  -5    0.45    0.16 
  -7   5   5    0.46    0.14 
  -7   5   5    0.35    0.14 
   6  -5  -5    0.56    0.16 
   6  -5  -5    1.06    0.26 
  -6   5   5    0.81    0.15 
  -6   5   5    0.80    0.17 
   5  -5  -5    0.16    0.17 
   5  -5  -5    0.21    0.13 
  -5   5   5    0.04    0.09 
  -5   5   5    0.17    0.09 
   4  -5  -5    0.36    0.14 
   4  -5  -5    0.22    0.09 
   4  -5  -5    0.43    0.18 
   4  -5  -5    0.38    0.06 
  -4   5   5    0.47    0.13 
   3  -5  -5    0.01    0.12 
   3  -5  -5    0.00    0.03 
   3  -5  -5    0.20    0.13 
   3  -5  -5   -0.02    0.07 
  -3   5   5    0.07    0.09 
   2  -5  -5    1.36    0.17 
   2  -5  -5    1.20    0.18 
   2  -5  -5    1.19    0.14 
  -2   5   5    1.15    0.14 
  -2   5   5    1.18    0.09 
   1  -5  -5    1.61    0.19 
   1  -5  -5    2.01    0.18 
   1  -5  -5    1.96    0.18 
  -1   5   5    1.99    0.12 
  -1   5   5    1.64    0.14 
   0  -5  -5   11.25    0.43 
   0  -5  -5   11.34    0.39 
   0  -5  -5   11.03    0.39 
   0   5   5   11.10    0.35 
   0   5   5   11.55    0.35 
  -1  -5  -5    3.14    0.23 
  -1  -5  -5    2.97    0.19 
  -1  -5  -5    3.10    0.25 
   1   5   5    2.80    0.20 
   1   5   5    3.23    0.16 
  -2  -5  -5    1.62    0.20 
  -2  -5  -5    1.16    0.16 
  -2  -5  -5    1.54    0.15 
   2   5   5    1.53    0.18 
   2   5   5    1.40    0.11 
  -3  -5  -5   -0.03    0.07 
  -3  -5  -5    0.04    0.11 
  -3  -5  -5   -0.15    0.09 
   3   5   5    0.10    0.12 
  -4  -5  -5    0.01    0.08 
  -4  -5  -5    0.10    0.12 
  -4  -5  -5   -0.01    0.09 
   4   5   5   -0.02    0.14 
  -5  -5  -5    1.55    0.22 
  -5  -5  -5    1.29    0.20 
   5   5   5    1.20    0.20 
   5   5   5    1.57    0.26 
  -6  -5  -5    0.41    0.15 
  -6  -5  -5    0.24    0.16 
   6   5   5    0.30    0.14 
   6   5   5    0.01    0.20 
  -7  -5  -5    0.51    0.18 
  -7  -5  -5    0.64    0.18 
   7   5   5    1.02    0.21 
   7   5   5    1.06    0.28 
  -8  -5  -5    1.03    0.24 
  -8  -5  -5    1.17    0.24 
   8   5   5    0.63    0.28 
  10  -6  -5    0.12    0.32 
 -10   6   5    0.55    0.20 
   9  -6  -5    0.30    0.30 
   9  -6  -5    1.10    0.24 
  -9   6   5    0.45    0.18 
  -9   6   5    0.70    0.18 
   8  -6  -5   -0.20    0.21 
   8  -6  -5    0.09    0.15 
  -8   6   5   -0.11    0.12 
  -8   6   5    0.10    0.11 
   7  -6  -5    0.03    0.19 
   7  -6  -5    0.14    0.15 
  -7   6   5    0.18    0.14 
  -7   6   5    0.08    0.10 
   6  -6  -5    0.09    0.18 
   6  -6  -5    0.23    0.14 
  -6   6   5    0.01    0.11 
  -6   6   5   -0.12    0.08 
   5  -6  -5    1.19    0.16 
   5  -6  -5    0.93    0.17 
   5  -6  -5    1.10    0.23 
  -5   6   5    0.80    0.15 
   4  -6  -5    0.66    0.21 
   4  -6  -5    0.20    0.15 
   4  -6  -5    0.36    0.10 
  -4   6   5    0.44    0.13 
   3  -6  -5    1.28    0.21 
   3  -6  -5    1.42    0.16 
   3  -6  -5    1.26    0.10 
   3  -6  -5    1.39    0.22 
  -3   6   5    1.21    0.16 
   2  -6  -5    0.18    0.13 
   2  -6  -5    0.09    0.09 
   2  -6  -5   -0.07    0.11 
  -2   6   5    0.05    0.05 
  -2   6   5    0.10    0.09 
   1  -6  -5    0.37    0.12 
   1  -6  -5    0.55    0.16 
   1  -6  -5    0.60    0.14 
  -1   6   5    0.32    0.09 
  -1   6   5    0.54    0.09 
   0  -6  -5    5.62    0.29 
   0  -6  -5    5.55    0.31 
   0  -6  -5    5.62    0.29 
   0   6   5    5.61    0.24 
   0   6   5    5.96    0.25 
  -1  -6  -5    0.87    0.15 
  -1  -6  -5    1.22    0.19 
  -1  -6  -5    1.10    0.15 
   1   6   5    1.03    0.15 
   1   6   5    0.88    0.11 
  -2  -6  -5    3.51    0.24 
  -2  -6  -5    3.58    0.28 
  -2  -6  -5    3.54    0.27 
   2   6   5    3.25    0.25 
   2   6   5    3.58    0.16 
  -3  -6  -5    2.66    0.24 
  -3  -6  -5    3.09    0.23 
  -3  -6  -5    3.27    0.28 
   3   6   5    3.18    0.28 
  -4  -6  -5    0.24    0.13 
  -4  -6  -5    0.16    0.09 
  -4  -6  -5    0.20    0.12 
   4   6   5    0.28    0.16 
  -5  -6  -5    0.13    0.12 
  -5  -6  -5   -0.02    0.13 
  -5  -6  -5    0.03    0.10 
   5   6   5    0.13    0.17 
  -6  -6  -5    0.89    0.20 
  -6  -6  -5    0.72    0.20 
   6   6   5    0.74    0.18 
   6   6   5    1.27    0.27 
  -7  -6  -5    0.31    0.17 
  -7  -6  -5    0.16    0.16 
   7   6   5    0.16    0.23 
  -8  -6  -5    0.11    0.17 
  -8  -6  -5    0.55    0.20 
   8   6   5    0.22    0.23 
 -10   7   5   -0.08    0.14 
   9  -7  -5    1.04    0.38 
  -9   7   5    1.26    0.25 
   8  -7  -5   -0.14    0.25 
   8  -7  -5    0.35    0.17 
  -8   7   5   -0.09    0.13 
   7  -7  -5    2.11    0.28 
   7  -7  -5    2.58    0.39 
   7  -7  -5    2.41    0.23 
  -7   7   5    2.77    0.30 
   6  -7  -5    0.17    0.16 
   6  -7  -5    0.31    0.22 
   6  -7  -5    0.24    0.10 
  -6   7   5    0.20    0.13 
   5  -7  -5    1.18    0.22 
   5  -7  -5    0.66    0.21 
   5  -7  -5    0.75    0.14 
  -5   7   5    0.98    0.17 
   4  -7  -5    0.42    0.18 
   4  -7  -5    0.79    0.14 
   4  -7  -5    0.87    0.19 
  -4   7   5    0.66    0.15 
   3  -7  -5    1.04    0.15 
   3  -7  -5    1.01    0.19 
   3  -7  -5    1.04    0.20 
  -3   7   5    0.56    0.13 
   2  -7  -5    2.32    0.22 
   2  -7  -5    2.35    0.25 
   2  -7  -5    2.15    0.25 
  -2   7   5    2.24    0.15 
  -2   7   5    2.22    0.20 
   1  -7  -5    1.72    0.22 
   1  -7  -5    1.78    0.19 
   1  -7  -5    1.72    0.21 
  -1   7   5    1.87    0.17 
  -1   7   5    1.86    0.16 
   0  -7  -5    1.65    0.19 
   0  -7  -5    1.09    0.17 
   0  -7  -5    1.28    0.20 
   0   7   5    1.23    0.14 
   0   7   5    1.25    0.15 
  -1  -7  -5    0.73    0.14 
  -1  -7  -5    0.62    0.17 
  -1  -7  -5    0.73    0.16 
   1   7   5    0.66    0.10 
   1   7   5    0.61    0.13 
  -2  -7  -5    1.01    0.19 
  -2  -7  -5    1.11    0.18 
  -2  -7  -5    0.88    0.16 
   2   7   5    0.73    0.16 
  -3  -7  -5   13.93    0.58 
  -3  -7  -5   14.22    0.54 
  -3  -7  -5   13.21    0.53 
   3   7   5   13.15    0.54 
  -4  -7  -5    2.55    0.24 
  -4  -7  -5    2.96    0.30 
  -4  -7  -5    2.06    0.24 
   4   7   5    2.75    0.31 
  -5  -7  -5    0.08    0.14 
  -5  -7  -5    0.25    0.15 
  -5  -7  -5    0.11    0.12 
   5   7   5   -0.09    0.17 
  -6  -7  -5   -0.04    0.13 
  -6  -7  -5    0.15    0.16 
   6   7   5   -0.08    0.17 
   6   7   5    0.09    0.12 
  -7  -7  -5    3.60    0.40 
  -7  -7  -5    3.20    0.36 
   7   7   5    3.00    0.42 
  -8  -7  -5    3.05    0.58 
  -8  -7  -5    2.44    0.35 
   8   7   5    2.27    0.62 
   9  -8  -5    0.85    0.35 
  -9   8   5    1.56    0.28 
   8  -8  -5   -0.08    0.22 
   8  -8  -5   -0.02    0.16 
  -8   8   5   -0.09    0.14 
   7  -8  -5    0.26    0.18 
   7  -8  -5   -0.27    0.21 
  -7   8   5    0.28    0.16 
   6  -8  -5    0.10    0.17 
   6  -8  -5   -0.09    0.20 
   6  -8  -5    0.08    0.10 
  -6   8   5   -0.03    0.11 
   5  -8  -5    0.21    0.17 
   5  -8  -5    0.20    0.10 
   5  -8  -5    0.05    0.19 
  -5   8   5    0.09    0.12 
   4  -8  -5    1.15    0.24 
   4  -8  -5    1.35    0.23 
   4  -8  -5    1.13    0.16 
  -4   8   5    1.37    0.20 
   3  -8  -5    0.90    0.20 
   3  -8  -5    0.84    0.15 
   3  -8  -5    0.87    0.20 
  -3   8   5    0.53    0.13 
   2  -8  -5    0.06    0.13 
   2  -8  -5    0.16    0.11 
   2  -8  -5    0.13    0.16 
  -2   8   5    0.11    0.09 
  -2   8   5    0.24    0.08 
   1  -8  -5    1.20    0.19 
   1  -8  -5    1.51    0.19 
   1  -8  -5    1.03    0.20 
  -1   8   5    1.18    0.14 
  -1   8   5    1.45    0.16 
   0  -8  -5    3.02    0.25 
   0  -8  -5    3.35    0.29 
   0  -8  -5    2.83    0.25 
   0   8   5    2.65    0.19 
   0   8   5    3.13    0.22 
  -1  -8  -5    0.08    0.12 
  -1  -8  -5    0.02    0.14 
  -1  -8  -5    0.03    0.09 
   1   8   5    0.06    0.06 
   1   8   5    0.05    0.10 
  -2  -8  -5    1.05    0.18 
  -2  -8  -5    0.58    0.16 
  -2  -8  -5    0.57    0.16 
   2   8   5    0.53    0.15 
  -3  -8  -5    0.74    0.18 
  -3  -8  -5    0.55    0.18 
  -3  -8  -5    0.67    0.15 
   3   8   5    0.47    0.17 
  -4  -8  -5    4.93    0.34 
  -4  -8  -5    4.42    0.35 
  -4  -8  -5    4.25    0.35 
   4   8   5    5.16    0.38 
  -5  -8  -5    0.11    0.12 
  -5  -8  -5   -0.09    0.13 
  -5  -8  -5    0.05    0.14 
   5   8   5    0.30    0.19 
  -6  -8  -5    0.09    0.16 
  -6  -8  -5    0.17    0.17 
   6   8   5    0.19    0.22 
  -7  -8  -5    0.16    0.16 
  -7  -8  -5   -0.20    0.14 
   7   8   5    0.31    0.25 
   9  -9  -5   -0.17    0.23 
  -9   9   5   -0.16    0.16 
   8  -9  -5    0.11    0.28 
  -8   9   5   -0.10    0.13 
   7  -9  -5    1.00    0.26 
   7  -9  -5    0.77    0.30 
  -7   9   5    1.07    0.23 
   6  -9  -5   -0.04    0.18 
   6  -9  -5   -0.25    0.19 
  -6   9   5    0.28    0.15 
   5  -9  -5    0.26    0.18 
   5  -9  -5    0.38    0.22 
  -5   9   5    0.33    0.15 
   4  -9  -5    0.25    0.12 
   4  -9  -5    0.46    0.20 
   4  -9  -5    0.18    0.18 
  -4   9   5    0.38    0.14 
   3  -9  -5    1.02    0.16 
   3  -9  -5    0.80    0.21 
   3  -9  -5    0.92    0.21 
  -3   9   5    0.76    0.15 
   2  -9  -5    0.13    0.13 
   2  -9  -5    0.16    0.16 
   2  -9  -5   -0.07    0.10 
  -2   9   5   -0.01    0.09 
   1  -9  -5    0.05    0.11 
   1  -9  -5   -0.01    0.15 
   1  -9  -5    0.07    0.12 
  -1   9   5   -0.02    0.08 
  -1   9   5    0.07    0.08 
   0  -9  -5    0.11    0.11 
   0  -9  -5   -0.05    0.15 
   0  -9  -5    0.11    0.12 
   0   9   5    0.33    0.12 
   0   9   5    0.08    0.08 
  -1  -9  -5    1.27    0.22 
  -1  -9  -5    1.76    0.24 
  -1  -9  -5    1.26    0.20 
   1   9   5    1.37    0.19 
  -2  -9  -5    2.49    0.26 
  -2  -9  -5    3.04    0.30 
  -2  -9  -5    2.87    0.27 
   2   9   5    2.54    0.28 
  -3  -9  -5    7.28    0.47 
  -3  -9  -5    7.77    0.43 
  -3  -9  -5    7.91    0.44 
   3   9   5    7.54    0.44 
  -4  -9  -5    0.44    0.16 
  -4  -9  -5    0.29    0.13 
  -4  -9  -5    0.31    0.16 
   4   9   5    0.10    0.16 
  -5  -9  -5    0.17    0.16 
  -5  -9  -5    0.09    0.15 
   5   9   5    0.15    0.19 
  -6  -9  -5   -0.22    0.14 
  -6  -9  -5    0.11    0.16 
   6   9   5   -0.09    0.20 
   8 -10  -5    0.17    0.27 
  -8  10   5    0.40    0.21 
   7 -10  -5    0.16    0.25 
   7 -10  -5   -0.08    0.20 
  -7  10   5    0.44    0.18 
   6 -10  -5    0.01    0.20 
   6 -10  -5    0.04    0.20 
  -6  10   5   -0.06    0.13 
   5 -10  -5    8.50    0.52 
   5 -10  -5    9.27    0.58 
  -5  10   5    8.91    0.47 
   4 -10  -5    7.22    0.48 
   4 -10  -5    6.72    0.45 
  -4  10   5    6.38    0.39 
   3 -10  -5    0.35    0.16 
   3 -10  -5    0.19    0.16 
  -3  10   5    0.52    0.15 
   2 -10  -5    0.16    0.17 
   2 -10  -5    0.15    0.13 
   2 -10  -5    0.01    0.12 
  -2  10   5    0.20    0.11 
   1 -10  -5   -0.07    0.12 
   1 -10  -5   -0.07    0.10 
   1 -10  -5   -0.07    0.13 
  -1  10   5    0.09    0.09 
  -1  10   5    0.39    0.13 
   0 -10  -5    0.83    0.21 
   0 -10  -5    0.90    0.18 
   0 -10  -5    0.71    0.18 
   0  10   5    0.99    0.17 
   0  10   5    0.88    0.16 
  -1 -10  -5    2.01    0.24 
  -1 -10  -5    2.17    0.28 
  -1 -10  -5    2.03    0.28 
   1  10   5    2.70    0.25 
  -2 -10  -5    0.30    0.15 
  -2 -10  -5    0.42    0.16 
  -2 -10  -5    0.28    0.16 
   2  10   5    0.42    0.15 
  -3 -10  -5    0.44    0.20 
  -3 -10  -5    0.46    0.17 
  -3 -10  -5    0.46    0.16 
   3  10   5    0.83    0.21 
  -4 -10  -5   -0.14    0.13 
  -4 -10  -5   -0.07    0.15 
  -4 -10  -5    0.04    0.11 
   4  10   5    0.07    0.15 
  -5 -10  -5    0.00    0.16 
  -5 -10  -5    0.28    0.17 
   5  10   5    0.21    0.21 
  -6 -10  -5    2.05    0.32 
  -6 -10  -5    1.91    0.34 
   6  10   5    1.52    0.32 
   8 -11  -5   -0.50    0.23 
  -8  11   5    0.14    0.16 
   7 -11  -5   -0.14    0.22 
  -7  11   5   -0.01    0.16 
   6 -11  -5    0.82    0.29 
   6 -11  -5    0.74    0.27 
  -6  11   5    0.91    0.23 
   5 -11  -5    0.65    0.23 
   5 -11  -5    0.15    0.21 
  -5  11   5    0.66    0.19 
   4 -11  -5    0.00    0.21 
   4 -11  -5   -0.11    0.16 
  -4  11   5    0.12    0.12 
   3 -11  -5    0.01    0.18 
   3 -11  -5    0.06    0.14 
  -3  11   5    0.06    0.12 
   2 -11  -5   -0.01    0.15 
   2 -11  -5    0.04    0.13 
  -2  11   5   -0.03    0.10 
   1 -11  -5    0.80    0.21 
   1 -11  -5    0.97    0.25 
  -1  11   5    1.02    0.17 
   0 -11  -5   -0.13    0.11 
   0 -11  -5    0.00    0.13 
   0 -11  -5   -0.08    0.15 
   0  11   5   -0.03    0.10 
  -1 -11  -5    0.09    0.13 
  -1 -11  -5    0.01    0.15 
  -1 -11  -5   -0.20    0.12 
   1  11   5   -0.11    0.11 
  -2 -11  -5   -0.13    0.13 
  -2 -11  -5   -0.16    0.10 
  -2 -11  -5   -0.12    0.16 
   2  11   5    0.23    0.15 
  -3 -11  -5    0.20    0.21 
  -3 -11  -5    0.17    0.16 
  -3 -11  -5    0.35    0.16 
   3  11   5    0.62    0.19 
  -4 -11  -5   -0.24    0.15 
  -4 -11  -5   -0.15    0.12 
   4  11   5   -0.07    0.15 
  -5 -11  -5    0.00    0.16 
  -5 -11  -5    0.13    0.17 
   5  11   5    0.13    0.19 
   7 -12  -5   -0.09    0.24 
  -7  12   5   -0.14    0.15 
   6 -12  -5    0.49    0.27 
  -6  12   5    0.36    0.18 
   5 -12  -5    1.11    0.28 
   5 -12  -5    1.39    0.31 
  -5  12   5    1.86    0.28 
   4 -12  -5   -0.33    0.18 
   4 -12  -5    0.00    0.18 
  -4  12   5    0.10    0.13 
   3 -12  -5    0.15    0.16 
   3 -12  -5    0.19    0.21 
  -3  12   5    0.30    0.15 
   2 -12  -5   -0.24    0.16 
   2 -12  -5   -0.04    0.14 
  -2  12   5   -0.04    0.10 
   1 -12  -5    0.38    0.20 
   1 -12  -5    0.16    0.15 
   0 -12  -5    2.06    0.30 
   0 -12  -5    2.16    0.33 
  -1 -12  -5    0.00    0.17 
  -1 -12  -5    0.32    0.15 
   1  12   5    0.42    0.21 
  -2 -12  -5   -0.15    0.13 
  -2 -12  -5    0.09    0.19 
  -2 -12  -5   -0.12    0.11 
   2  12   5    0.41    0.17 
  -3 -12  -5    0.02    0.14 
  -3 -12  -5   -0.14    0.15 
   3  12   5    0.34    0.18 
  -4 -12  -5    0.12    0.17 
  -4 -12  -5    0.08    0.19 
   4  12   5    0.38    0.20 
   6 -13  -5   -0.07    0.22 
  -6  13   5    0.35    0.19 
   5 -13  -5   -0.22    0.23 
   5 -13  -5   -0.12    0.17 
  -5  13   5   -0.24    0.13 
   4 -13  -5    0.34    0.23 
   4 -13  -5    0.64    0.24 
  -4  13   5    0.52    0.18 
   3 -13  -5    0.06    0.17 
   3 -13  -5   -0.05    0.20 
  -3  13   5   -0.03    0.11 
   2 -13  -5    0.50    0.20 
   2 -13  -5    0.93    0.26 
   1 -13  -5    1.40    0.29 
   1 -13  -5    1.46    0.29 
   0 -13  -5   -0.19    0.17 
   0 -13  -5   -0.10    0.12 
  -1 -13  -5    1.20    0.26 
  -1 -13  -5    0.78    0.24 
  -2 -13  -5    0.53    0.24 
  -3 -13  -5    0.38    0.23 
   3  13   5    0.18    0.17 
   5 -14  -5   -0.26    0.18 
  -5  14   5   -0.08    0.15 
   4 -14  -5    0.05    0.19 
   4 -14  -5   -0.27    0.20 
  -4  14   5    0.04    0.14 
   3 -14  -5    0.17    0.22 
   3 -14  -5    0.79    0.26 
   2 -14  -5   -0.08    0.16 
   2 -14  -5   -0.12    0.19 
   1 -14  -5   -0.27    0.16 
   1 -14  -5    0.07    0.16 
   0 -14  -5    0.45    0.20 
   0 -14  -5    0.21    0.20 
  -1 -14  -5   -0.42    0.16 
  -1  17  -6    0.56    0.20 
  -2  17  -6    0.31    0.17 
   2  16  -6    0.36    0.20 
  -2 -16   6   -0.08    0.17 
   1  16  -6   -0.14    0.12 
  -1 -16   6   -0.13    0.17 
   0  16  -6    2.12    0.32 
   0 -16   6    1.89    0.37 
  -1  16  -6    0.02    0.14 
   1 -16   6   -0.02    0.18 
   2 -16   6    0.86    0.27 
   2 -16   6    1.06    0.24 
   3 -16   6    0.11    0.17 
   3 -16   6    0.06    0.14 
  -4  16  -6    0.00    0.17 
   4 -16   6   -0.07    0.18 
   4 -16   6    0.17    0.15 
  -5  16  -6   -0.16    0.17 
   5 -16   6   -0.05    0.23 
   3  15  -6    0.37    0.17 
  -3 -15   6   -0.04    0.15 
  -3 -15   6    0.08    0.15 
   2  15  -6    0.03    0.15 
  -2 -15   6    0.03    0.18 
  -2 -15   6   -0.01    0.14 
   1  15  -6    0.79    0.21 
  -1 -15   6    0.84    0.27 
   0  15  -6    0.11    0.15 
   0 -15   6    0.12    0.17 
   1 -15   6   -0.02    0.13 
   1 -15   6    0.15    0.18 
   2 -15   6    0.68    0.25 
   2 -15   6    0.49    0.19 
  -3  15  -6   -0.32    0.13 
   3 -15   6    0.13    0.20 
   3 -15   6   -0.11    0.11 
  -4  15  -6    0.00    0.16 
   4 -15   6    0.51    0.24 
   4 -15   6   -0.06    0.11 
  -5  15  -6   -0.26    0.15 
   5 -15   6    0.21    0.22 
   5 -15   6    0.01    0.13 
  -6  15  -6    0.06    0.20 
   6 -15   6    0.31    0.26 
   4  14  -6    0.05    0.15 
  -4 -14   6   -0.02    0.15 
  -4 -14   6    0.08    0.17 
   3  14  -6    0.40    0.19 
  -3 -14   6    0.13    0.15 
  -3 -14   6    0.28    0.20 
   2  14  -6    0.21    0.16 
  -2 -14   6    0.11    0.16 
  -2 -14   6   -0.07    0.13 
   1  14  -6    0.56    0.19 
  -1 -14   6    0.46    0.16 
  -1 -14   6    0.37    0.20 
   0  14  -6    0.83    0.21 
   0 -14   6    0.55    0.21 
   1 -14   6    0.08    0.13 
   1 -14   6    0.14    0.16 
  -2  14  -6   -0.04    0.13 
   2 -14   6    0.14    0.14 
   2 -14   6    0.23    0.20 
  -3  14  -6    0.10    0.15 
   3 -14   6   -0.12    0.16 
   3 -14   6    0.00    0.12 
  -4  14  -6    0.79    0.22 
   4 -14   6    1.26    0.29 
   4 -14   6    0.63    0.19 
  -5  14  -6   -0.02    0.16 
   5 -14   6   -0.07    0.19 
   5 -14   6   -0.03    0.12 
  -6  14  -6   -0.12    0.18 
   6 -14   6    0.19    0.23 
   6 -14   6    0.10    0.13 
  -7  14  -6    0.09    0.20 
   7 -14   6   -0.15    0.19 
   5  13  -6    1.94    0.34 
  -5 -13   6    1.94    0.36 
  -5 -13   6    1.82    0.32 
   4  13  -6    2.67    0.36 
  -4 -13   6    1.61    0.28 
  -4 -13   6    1.68    0.32 
   3  13  -6    0.49    0.20 
  -3 -13   6    0.30    0.17 
  -3 -13   6    0.86    0.21 
   2  13  -6    1.08    0.24 
  -2 -13   6    1.11    0.22 
  -2 -13   6    0.91    0.25 
   1  13  -6    6.87    0.44 
  -1 -13   6    6.36    0.39 
  -1 -13   6    6.58    0.48 
   0 -13   6    0.25    0.16 
   0 -13   6    0.46    0.18 
   0 -13   6    0.18    0.12 
  -1  13  -6    1.28    0.19 
   1 -13   6    1.11    0.21 
   1 -13   6    1.50    0.28 
  -2  13  -6    2.89    0.27 
   2 -13   6    2.29    0.32 
   2 -13   6    2.49    0.29 
  -3  13  -6    0.32    0.16 
   3 -13   6    0.25    0.19 
   3 -13   6   -0.01    0.12 
  -4  13  -6   -0.04    0.14 
   4 -13   6    0.06    0.17 
   4 -13   6    0.05    0.12 
  -5  13  -6    2.59    0.31 
   5 -13   6    2.49    0.31 
   5 -13   6    2.48    0.37 
  -6  13  -6    3.66    0.39 
   6 -13   6    3.76    0.46 
   6 -13   6    2.78    0.32 
  -7  13  -6    0.51    0.23 
   7 -13   6    0.32    0.17 
   7 -13   6    0.23    0.25 
  -8  13  -6    0.52    0.29 
   8 -13   6    0.05    0.26 
   6  12  -6    0.65    0.23 
  -6 -12   6    0.74    0.23 
  -6 -12   6    0.52    0.24 
   5  12  -6    1.61    0.29 
  -5 -12   6    2.04    0.35 
  -5 -12   6    1.50    0.26 
   4  12  -6    0.05    0.15 
  -4 -12   6    0.18    0.17 
  -4 -12   6    0.46    0.18 
   3  12  -6    0.88    0.23 
  -3 -12   6    0.59    0.19 
  -3 -12   6    0.64    0.18 
   2  12  -6    8.56    0.48 
  -2 -12   6    9.38    0.47 
  -2 -12   6   10.01    0.56 
   1  12  -6    6.87    0.41 
  -1 -12   6    6.32    0.36 
  -1 -12   6    6.40    0.45 
   0  12  -6    2.86    0.22 
   0 -12   6    2.56    0.29 
   0 -12   6    2.56    0.24 
   0 -12   6    2.73    0.34 
  -1  12  -6    0.23    0.12 
   1 -12   6    0.32    0.15 
   1 -12   6    0.64    0.20 
   1 -12   6    0.47    0.13 
  -2  12  -6    0.23    0.14 
   2 -12   6    0.28    0.13 
   2 -12   6    0.51    0.20 
  -3  12  -6    0.13    0.12 
   3 -12   6    0.29    0.16 
   3 -12   6    0.19    0.13 
  -4  12  -6    1.88    0.25 
   4 -12   6    2.35    0.34 
   4 -12   6    1.71    0.24 
  -5  12  -6    0.30    0.18 
   5 -12   6    0.18    0.13 
   5 -12   6    0.23    0.21 
  -6  12  -6    0.06    0.15 
   6 -12   6   -0.08    0.18 
   6 -12   6    0.01    0.12 
  -7  12  -6    0.63    0.24 
   7 -12   6    0.70    0.30 
   7 -12   6    0.73    0.20 
  -8  12  -6   -0.03    0.16 
   8 -12   6   -0.33    0.20 
   7  11  -6    0.48    0.22 
   7  11  -6    0.36    0.22 
  -7 -11   6    0.61    0.23 
  -7 -11   6    0.12    0.15 
   6  11  -6    0.18    0.18 
  -6 -11   6   -0.09    0.14 
  -6 -11   6   -0.09    0.13 
  -6 -11   6   -0.02    0.15 
   5  11  -6    0.16    0.15 
  -5 -11   6    0.09    0.15 
  -5 -11   6    0.01    0.12 
  -5 -11   6    0.06    0.14 
   4  11  -6    0.22    0.14 
  -4 -11   6   -0.13    0.13 
  -4 -11   6    0.22    0.12 
  -4 -11   6    0.13    0.14 
   3  11  -6    1.44    0.23 
  -3 -11   6    1.28    0.17 
  -3 -11   6    1.67    0.28 
  -3 -11   6    1.66    0.24 
   2  11  -6    2.59    0.30 
  -2 -11   6    2.68    0.26 
  -2 -11   6    2.64    0.33 
  -1 -11   6    0.12    0.11 
  -1 -11   6   -0.02    0.09 
  -1 -11   6   -0.10    0.12 
   0  11  -6    0.43    0.12 
   0 -11   6    0.34    0.14 
   0 -11   6    0.41    0.15 
   0 -11   6    0.05    0.09 
  -1  11  -6    1.15    0.16 
   1 -11   6    1.38    0.23 
   1 -11   6    1.10    0.20 
   1 -11   6    1.12    0.15 
  -2  11  -6    1.05    0.18 
   2 -11   6    0.55    0.18 
   2 -11   6    0.90    0.16 
  -3  11  -6    1.40    0.20 
   3 -11   6    1.53    0.22 
   3 -11   6    1.30    0.23 
  -4  11  -6    0.53    0.17 
   4 -11   6    0.37    0.20 
   4 -11   6    0.36    0.13 
  -5  11  -6    6.10    0.41 
   5 -11   6    5.82    0.37 
   5 -11   6    6.62    0.48 
  -6  11  -6    0.56    0.20 
   6 -11   6    0.32    0.22 
   6 -11   6    0.46    0.16 
  -7  11  -6   -0.10    0.15 
   7 -11   6   -0.12    0.12 
   7 -11   6    0.11    0.22 
  -8  11  -6    1.94    0.30 
   8 -11   6    1.91    0.29 
   8 -11   6    1.51    0.36 
  -9  11  -6    0.14    0.19 
   9 -11   6    0.16    0.28 
   7  10  -6    1.58    0.31 
   7  10  -6    1.67    0.31 
  -7 -10   6    1.64    0.26 
  -7 -10   6    1.34    0.29 
   6  10  -6    3.45    0.40 
  -6 -10   6    2.81    0.38 
  -6 -10   6    2.69    0.30 
  -6 -10   6    2.18    0.30 
   5  10  -6    1.56    0.25 
  -5 -10   6    1.69    0.29 
  -5 -10   6    1.38    0.21 
  -5 -10   6    1.35    0.25 
   4  10  -6    0.48    0.15 
  -4 -10   6    0.57    0.17 
  -4 -10   6    0.26    0.12 
  -4 -10   6    0.18    0.15 
   3  10  -6    9.69    0.48 
  -3 -10   6    9.97    0.47 
  -3 -10   6   10.79    0.42 
  -3 -10   6   11.46    0.56 
   2  10  -6   45.46    1.24 
  -2 -10   6   46.94    1.20 
  -2 -10   6   44.10    1.29 
  -2 -10   6   46.10    1.09 
   1  10  -6    1.09    0.13 
  -1 -10   6    1.07    0.16 
  -1 -10   6    1.37    0.22 
  -1 -10   6    0.89    0.17 
   0  10  -6    2.28    0.19 
   0 -10   6    2.01    0.24 
   0 -10   6    2.01    0.25 
   0 -10   6    1.86    0.18 
  -1  10  -6   12.11    0.43 
   1 -10   6   11.27    0.39 
   1 -10   6   12.32    0.49 
   1 -10   6   12.00    0.54 
  -2  10  -6    0.57    0.13 
   2 -10   6    0.90    0.16 
   2 -10   6    0.72    0.17 
   2 -10   6    0.89    0.12 
  -3  10  -6    1.56    0.20 
   3 -10   6    1.59    0.24 
   3 -10   6    1.43    0.20 
  -4  10  -6    0.10    0.12 
   4 -10   6    0.04    0.10 
   4 -10   6    0.07    0.15 
  -5  10  -6    0.71    0.20 
   5 -10   6    0.83    0.18 
   5 -10   6    0.85    0.24 
  -6  10  -6    1.38    0.25 
   6 -10   6    1.47    0.23 
   6 -10   6    1.54    0.28 
  -7  10  -6   -0.20    0.15 
   7 -10   6   -0.05    0.12 
   7 -10   6    0.01    0.22 
  -8  10  -6    3.65    0.39 
   8 -10   6    3.11    0.34 
   8 -10   6    3.89    0.49 
  -9  10  -6    1.85    0.29 
   9 -10   6    2.39    0.33 
   9 -10   6    2.13    0.40 
   8   9  -6    0.59    0.24 
   8   9  -6    0.45    0.19 
  -8  -9   6    0.24    0.19 
  -8  -9   6    0.54    0.19 
   7   9  -6    0.85    0.24 
   7   9  -6    0.90    0.26 
  -7  -9   6    0.53    0.20 
  -7  -9   6    0.98    0.22 
   6   9  -6    1.34    0.25 
  -6  -9   6    1.06    0.21 
  -6  -9   6    1.07    0.25 
  -6  -9   6    0.93    0.23 
   5   9  -6    0.19    0.14 
  -5  -9   6   -0.01    0.10 
  -5  -9   6   -0.07    0.11 
  -5  -9   6   -0.06    0.13 
   4   9  -6   11.79    0.54 
  -4  -9   6   12.43    0.59 
  -4  -9   6   11.01    0.51 
  -4  -9   6   13.40    0.50 
   3   9  -6    0.16    0.13 
  -3  -9   6    0.32    0.13 
  -3  -9   6    0.34    0.13 
  -3  -9   6    0.36    0.11 
   2   9  -6    2.44    0.22 
  -2  -9   6    1.90    0.25 
  -2  -9   6    1.68    0.15 
  -2  -9   6    1.70    0.20 
   1   9  -6    5.34    0.23 
  -1  -9   6    5.58    0.22 
  -1  -9   6    5.63    0.32 
  -1  -9   6    5.82    0.29 
  -1  -9   6    4.42    0.32 
   0   9  -6    1.18    0.14 
   0  -9   6    1.28    0.15 
   0  -9   6    1.08    0.18 
   0  -9   6    1.04    0.12 
   0  -9   6    1.43    0.21 
  -1   9  -6    2.57    0.20 
   1  -9   6    2.73    0.18 
   1  -9   6    2.47    0.22 
   1  -9   6    2.58    0.24 
  -2   9  -6    4.05    0.27 
   2  -9   6    4.16    0.27 
   2  -9   6    3.68    0.28 
   2  -9   6    4.14    0.19 
  -3   9  -6    0.14    0.13 
   3  -9   6    0.17    0.14 
   3  -9   6    0.27    0.11 
  -4   9  -6    0.55    0.16 
   4  -9   6    0.68    0.19 
   4  -9   6    0.28    0.12 
  -5   9  -6    0.14    0.14 
   5  -9   6    0.18    0.16 
   5  -9   6    0.18    0.12 
  -6   9  -6    4.10    0.33 
   6  -9   6    3.92    0.39 
   6  -9   6    4.64    0.33 
  -7   9  -6    0.17    0.17 
   7  -9   6   -0.02    0.21 
   7  -9   6    0.26    0.15 
  -8   9  -6    1.20    0.26 
   8  -9   6    1.41    0.34 
   8  -9   6    1.53    0.25 
  -9   9  -6    0.20    0.20 
   9  -9   6   -0.16    0.24 
   9  -9   6    0.19    0.16 
   8   8  -6    0.50    0.20 
   8   8  -6    0.16    0.20 
  -8  -8   6    0.26    0.17 
  -8  -8   6    0.03    0.14 
   7   8  -6    1.38    0.27 
   7   8  -6    1.33    0.27 
  -7  -8   6    0.61    0.19 
  -7  -8   6    1.01    0.23 
   6   8  -6    1.64    0.26 
  -6  -8   6    1.75    0.26 
  -6  -8   6    1.59    0.23 
  -6  -8   6    1.60    0.28 
   5   8  -6   -0.11    0.10 
  -5  -8   6   -0.08    0.08 
  -5  -8   6   -0.09    0.12 
  -5  -8   6   -0.03    0.10 
   4   8  -6    0.27    0.13 
  -4  -8   6    0.40    0.14 
  -4  -8   6    0.33    0.12 
  -4  -8   6    0.52    0.16 
   3   8  -6    8.69    0.41 
  -3  -8   6    9.73    0.47 
  -3  -8   6    9.36    0.37 
  -3  -8   6   10.01    0.43 
   2   8  -6    0.35    0.07 
   2   8  -6    0.36    0.12 
  -2  -8   6    0.20    0.08 
  -2  -8   6    0.37    0.13 
  -2  -8   6    0.25    0.10 
   1   8  -6   13.14    0.38 
  -1  -8   6   13.55    0.52 
  -1  -8   6   13.04    0.44 
  -1  -8   6   13.02    0.37 
  -1  -8   6   12.35    0.48 
   0   8  -6   17.24    0.50 
   0  -8   6   17.46    0.57 
   0  -8   6   18.39    0.51 
   0  -8   6   17.75    0.61 
   0  -8   6   18.94    0.42 
  -1   8  -6    1.14    0.14 
   1  -8   6    1.09    0.16 
   1  -8   6    1.23    0.12 
   1  -8   6    1.46    0.20 
  -2   8  -6    2.26    0.21 
   2  -8   6    2.35    0.13 
   2  -8   6    2.20    0.23 
   2  -8   6    2.44    0.21 
  -3   8  -6    0.27    0.13 
   3  -8   6    0.27    0.11 
   3  -8   6    0.41    0.15 
  -4   8  -6    9.40    0.42 
   4  -8   6    9.07    0.41 
   4  -8   6    9.03    0.46 
  -5   8  -6    1.27    0.19 
   5  -8   6    1.30    0.24 
   5  -8   6    1.05    0.18 
  -6   8  -6    0.00    0.14 
   6  -8   6   -0.25    0.13 
   6  -8   6   -0.15    0.10 
  -7   8  -6    7.31    0.44 
   7  -8   6    7.19    0.42 
   7  -8   6    6.72    0.50 
  -8   8  -6    2.68    0.32 
   8  -8   6    2.13    0.36 
   8  -8   6    2.29    0.30 
  -9   8  -6    2.87    0.34 
   9  -8   6    2.86    0.45 
   9  -8   6    2.09    0.31 
 -10   8  -6   -0.20    0.15 
  10  -8   6   -0.18    0.16 
  10  -8   6   -0.31    0.27 
   9   7  -6    0.45    0.21 
   9   7  -6    0.23    0.23 
  -9  -7   6    0.00    0.16 
  -9  -7   6    0.23    0.18 
   8   7  -6    0.36    0.20 
   8   7  -6    0.13    0.15 
  -8  -7   6    0.17    0.16 
  -8  -7   6    0.18    0.13 
   7   7  -6    0.30    0.19 
   7   7  -6    0.61    0.19 
  -7  -7   6    0.27    0.15 
  -7  -7   6    0.26    0.16 
   6   7  -6    0.55    0.18 
   6   7  -6    0.69    0.20 
  -6  -7   6    0.58    0.17 
  -6  -7   6    0.51    0.15 
   5   7  -6    0.24    0.13 
  -5  -7   6    0.17    0.13 
  -5  -7   6    0.31    0.13 
  -5  -7   6    0.40    0.15 
   4   7  -6    6.90    0.36 
  -4  -7   6    6.26    0.32 
  -4  -7   6    6.64    0.39 
  -4  -7   6    6.12    0.36 
   3   7  -6   49.78    1.24 
  -3  -7   6   50.85    1.17 
  -3  -7   6   46.71    1.28 
  -3  -7   6   49.55    1.23 
   2   7  -6    8.03    0.25 
  -2  -7   6    7.64    0.29 
  -2  -7   6    7.54    0.38 
  -2  -7   6    7.74    0.33 
   1   7  -6    1.12    0.11 
  -1  -7   6    1.05    0.16 
  -1  -7   6    0.99    0.10 
  -1  -7   6    0.92    0.14 
  -1  -7   6    0.97    0.12 
   0   7  -6   53.79    1.22 
   0  -7   6   55.34    1.33 
   0  -7   6   57.45    1.15 
   0  -7   6   56.94    1.23 
   0  -7   6   55.27    1.31 
  -1   7  -6   12.15    0.41 
   1  -7   6   13.26    0.47 
   1  -7   6   13.14    0.45 
   1  -7   6   13.47    0.35 
  -2   7  -6    2.29    0.19 
   2  -7   6    2.55    0.21 
   2  -7   6    2.77    0.23 
   2  -7   6    2.74    0.11 
  -3   7  -6   10.73    0.40 
   3  -7   6   10.47    0.43 
   3  -7   6   10.78    0.42 
  -4   7  -6    1.57    0.19 
   4  -7   6    2.10    0.25 
   4  -7   6    1.24    0.17 
  -5   7  -6    7.29    0.36 
   5  -7   6    6.91    0.37 
   5  -7   6    7.29    0.42 
  -6   7  -6   -0.06    0.12 
   6  -7   6    0.12    0.11 
   6  -7   6    0.16    0.18 
  -7   7  -6    3.71    0.31 
   7  -7   6    3.72    0.33 
   7  -7   6    4.24    0.41 
  -8   7  -6    0.59    0.20 
   8  -7   6    0.80    0.29 
   8  -7   6    0.57    0.20 
  -9   7  -6   -0.18    0.15 
   9  -7   6    0.03    0.17 
 -10   7  -6   -0.29    0.15 
  10  -7   6   -0.30    0.27 
  10  -7   6   -0.12    0.17 
   9   6  -6    0.30    0.19 
   9   6  -6    0.20    0.22 
  -9  -6   6    0.01    0.15 
  -9  -6   6   -0.06    0.15 
   8   6  -6    1.50    0.28 
   8   6  -6    0.72    0.22 
  -8  -6   6    0.52    0.18 
  -8  -6   6    0.78    0.22 
   7   6  -6    0.11    0.15 
   7   6  -6   -0.07    0.12 
  -7  -6   6   -0.04    0.10 
  -7  -6   6    0.05    0.12 
   6   6  -6    0.54    0.16 
   6   6  -6    0.38    0.16 
  -6  -6   6    0.67    0.18 
  -6  -6   6    0.27    0.13 
   5   6  -6    4.27    0.30 
  -5  -6   6    4.82    0.36 
  -5  -6   6    4.47    0.30 
  -5  -6   6    5.13    0.33 
   4   6  -6    6.76    0.34 
  -4  -6   6    7.17    0.40 
  -4  -6   6    7.04    0.36 
  -4  -6   6    7.03    0.33 
   3   6  -6    1.55    0.18 
   3   6  -6    1.75    0.10 
  -3  -6   6    1.53    0.16 
  -3  -6   6    1.68    0.21 
  -3  -6   6    1.18    0.15 
   2   6  -6   23.55    0.55 
  -2  -6   6   24.02    0.66 
  -2  -6   6   23.05    0.60 
  -2  -6   6   24.20    0.67 
  -2  -6   6   22.81    0.70 
   1   6  -6    4.46    0.18 
  -1  -6   6    4.48    0.24 
  -1  -6   6    4.40    0.21 
  -1  -6   6    4.37    0.18 
  -1  -6   6    4.72    0.26 
   0   6  -6    0.19    0.07 
   0  -6   6    0.10    0.04 
   0  -6   6    0.11    0.09 
   0  -6   6    0.07    0.07 
   0  -6   6    0.14    0.06 
  -1   6  -6    1.45    0.14 
   1  -6   6    1.50    0.16 
   1  -6   6    1.51    0.16 
   1  -6   6    1.44    0.09 
  -2   6  -6    2.22    0.18 
   2  -6   6    2.16    0.18 
   2  -6   6    2.62    0.20 
  -3   6  -6    7.35    0.19 
  -3   6  -6    7.35    0.32 
   3  -6   6    7.94    0.36 
   3  -6   6    7.73    0.34 
  -4   6  -6    7.03    0.33 
  -4   6  -6    7.04    0.22 
   4  -6   6    7.23    0.35 
   4  -6   6    7.70    0.38 
  -5   6  -6    1.36    0.12 
  -5   6  -6    1.54    0.20 
   5  -6   6    1.42    0.23 
   5  -6   6    1.20    0.18 
  -6   6  -6    0.98    0.18 
  -6   6  -6    0.70    0.11 
   6  -6   6    0.81    0.19 
   6  -6   6    0.61    0.20 
  -7   6  -6    3.16    0.30 
   7  -6   6    3.01    0.29 
   7  -6   6    3.23    0.37 
  -8   6  -6    0.14    0.15 
   8  -6   6    0.00    0.15 
   8  -6   6   -0.09    0.22 
  -9   6  -6   -0.28    0.13 
   9  -6   6    0.31    0.20 
   9  -6   6   -0.16    0.24 
  10  -6   6   -0.06    0.18 
  10  -6   6   -0.50    0.26 
   9   5  -6    1.81    0.32 
   9   5  -6    1.73    0.32 
  -9  -5   6    1.42    0.29 
  -9  -5   6    1.47    0.27 
   8   5  -6    0.24    0.18 
   8   5  -6    0.38    0.19 
  -8  -5   6    0.07    0.13 
  -8  -5   6    0.30    0.15 
   7   5  -6    1.37    0.25 
   7   5  -6    1.25    0.23 
  -7  -5   6    1.05    0.22 
  -7  -5   6    1.03    0.19 
   6   5  -6    0.24    0.14 
   6   5  -6    0.08    0.12 
  -6  -5   6    0.25    0.14 
  -6  -5   6    0.42    0.14 
   5   5  -6    2.26    0.24 
   5   5  -6    2.48    0.29 
  -5  -5   6    1.96    0.25 
  -5  -5   6    1.90    0.22 
  -5  -5   6    2.40    0.23 
   4   5  -6   21.57    0.66 
  -4  -5   6   22.54    0.50 
  -4  -5   6   22.42    0.65 
  -4  -5   6   22.26    0.69 
  -4  -5   6   20.99    0.71 
   3   5  -6   18.53    0.57 
  -3  -5   6   19.95    0.63 
  -3  -5   6   19.30    0.59 
  -3  -5   6   19.55    0.56 
  -3  -5   6   20.19    0.46 
   2   5  -6    0.03    0.04 
  -2  -5   6    0.08    0.06 
  -2  -5   6    0.06    0.07 
  -2  -5   6    0.08    0.07 
  -2  -5   6    0.02    0.05 
   1   5  -6   17.14    0.44 
  -1  -5   6   17.73    0.50 
  -1  -5   6   17.06    0.51 
  -1  -5   6   17.58    0.47 
  -1  -5   6   16.97    0.43 
   0   5  -6    1.12    0.11 
   0  -5   6    1.26    0.14 
   0  -5   6    1.40    0.08 
   0  -5   6    1.36    0.13 
   0  -5   6    1.44    0.10 
  -1   5  -6    1.20    0.06 
  -1   5  -6    0.96    0.11 
   1  -5   6    1.01    0.06 
   1  -5   6    1.08    0.13 
   1  -5   6    0.98    0.12 
  -2   5  -6    1.15    0.06 
  -2   5  -6    1.00    0.12 
   2  -5   6    0.99    0.13 
   2  -5   6    1.22    0.15 
  -3   5  -6   18.38    0.42 
  -3   5  -6   18.24    0.53 
   3  -5   6   17.15    0.54 
   3  -5   6   18.38    0.55 
  -4   5  -6    0.17    0.06 
  -4   5  -6    0.30    0.12 
   4  -5   6    0.57    0.15 
   4  -5   6    0.07    0.10 
   4  -5   6    0.21    0.04 
  -5   5  -6    0.06    0.11 
  -5   5  -6    0.07    0.06 
   5  -5   6    0.12    0.06 
   5  -5   6   -0.04    0.11 
   5  -5   6   -0.03    0.12 
  -6   5  -6   11.81    0.47 
  -6   5  -6   12.06    0.42 
   6  -5   6   13.13    0.55 
   6  -5   6   12.08    0.52 
  -7   5  -6    3.08    0.23 
  -7   5  -6    3.18    0.28 
   7  -5   6    2.60    0.29 
   7  -5   6    3.02    0.35 
  -8   5  -6    0.05    0.09 
  -8   5  -6    0.14    0.14 
   8  -5   6    0.07    0.22 
   8  -5   6    0.10    0.18 
  -9   5  -6    2.06    0.27 
   9  -5   6    2.44    0.41 
   9  -5   6    1.60    0.30 
  10  -5   6   -0.17    0.27 
  10  -5   6   -0.23    0.18 
  10   4  -6    1.50    0.53 
  10   4  -6    1.04    0.43 
 -10  -4   6    0.94    0.26 
   9   4  -6    2.27    0.37 
   9   4  -6    2.26    0.34 
  -9  -4   6    2.05    0.31 
  -9  -4   6    1.60    0.30 
   8   4  -6   -0.08    0.15 
   8   4  -6    0.17    0.17 
  -8  -4   6    0.03    0.14 
  -8  -4   6   -0.04    0.14 
   7   4  -6    0.66    0.18 
   7   4  -6    0.43    0.18 
  -7  -4   6    0.14    0.15 
  -7  -4   6    0.26    0.12 
   6   4  -6    0.26    0.15 
   6   4  -6    0.10    0.12 
  -6  -4   6    0.25    0.12 
  -6  -4   6    0.24    0.13 
   5   4  -6    9.72    0.41 
   5   4  -6   10.30    0.47 
  -5  -4   6   10.46    0.46 
  -5  -4   6   10.29    0.43 
  -5  -4   6   10.03    0.32 
   4   4  -6   21.03    0.62 
  -4  -4   6   21.91    0.70 
  -4  -4   6   21.79    0.67 
  -4  -4   6   22.53    0.52 
  -4  -4   6   20.95    0.63 
   3   4  -6    0.19    0.08 
  -3  -4   6    0.07    0.07 
  -3  -4   6    0.13    0.08 
  -3  -4   6    0.14    0.05 
  -3  -4   6    0.03    0.08 
  -2  -4   6    0.68    0.10 
  -2  -4   6    0.81    0.08 
  -2  -4   6    0.75    0.10 
  -2  -4   6    0.88    0.13 
  -2  -4   6    0.71    0.09 
  -1  -4   6   91.62    1.90 
  -1  -4   6   93.30    1.95 
  -1  -4   6   92.70    1.93 
  -1  -4   6   93.99    1.91 
  -1  -4   6   95.18    1.98 
   0   4  -6   25.60    0.61 
   0  -4   6   26.36    0.65 
   0  -4   6   26.28    0.64 
   0  -4   6   25.76    0.57 
   0  -4   6   26.01    0.58 
  -1   4  -6   -0.01    0.05 
  -1   4  -6    0.10    0.07 
   1  -4   6    0.11    0.07 
   1  -4   6    0.02    0.06 
  -2   4  -6    8.01    0.29 
  -2   4  -6    8.23    0.22 
   2  -4   6    7.85    0.30 
   2  -4   6    8.62    0.30 
  -3   4  -6    1.47    0.10 
  -3   4  -6    1.22    0.13 
   3  -4   6    1.27    0.16 
   3  -4   6    1.86    0.19 
  -4   4  -6    0.03    0.04 
  -4   4  -6   -0.07    0.08 
  -4   4  -6   -0.03    0.05 
   4  -4   6    0.12    0.12 
   4  -4   6    0.02    0.09 
  -5   4  -6    6.31    0.26 
  -5   4  -6    6.16    0.22 
  -5   4  -6    5.64    0.30 
   5  -4   6    5.84    0.35 
   5  -4   6    6.24    0.34 
  -6   4  -6    2.85    0.23 
  -6   4  -6    2.30    0.19 
   6  -4   6    2.73    0.30 
   6  -4   6    2.39    0.28 
  -7   4  -6    3.90    0.29 
  -7   4  -6    4.63    0.28 
   7  -4   6    4.18    0.38 
   7  -4   6    4.44    0.36 
  -8   4  -6   -0.16    0.11 
  -8   4  -6   -0.02    0.09 
   8  -4   6   -0.25    0.13 
   8  -4   6    0.01    0.22 
  -9   4  -6   -0.03    0.10 
   9  -4   6    0.09    0.18 
   9  -4   6    0.02    0.24 
  10  -4   6   -0.09    0.28 
  10  -4   6    0.00    0.20 
  10   3  -6    0.44    0.24 
 -10  -3   6    0.03    0.16 
 -10  -3   6    0.39    0.18 
   9   3  -6    1.26    0.31 
   9   3  -6    0.53    0.22 
  -9  -3   6    1.20    0.25 
  -9  -3   6    1.17    0.25 
   8   3  -6    0.18    0.18 
   8   3  -6    0.06    0.16 
  -8  -3   6    0.25    0.16 
  -8  -3   6    0.22    0.15 
   7   3  -6    0.90    0.18 
   7   3  -6    0.88    0.21 
  -7  -3   6    0.88    0.18 
  -7  -3   6    0.92    0.20 
   6   3  -6    2.35    0.23 
   6   3  -6    2.32    0.28 
  -6  -3   6    2.53    0.25 
  -6  -3   6    2.03    0.22 
   5   3  -6    5.06    0.28 
   5   3  -6    4.96    0.32 
  -5  -3   6    5.01    0.31 
  -5  -3   6    5.77    0.21 
  -5  -3   6    6.18    0.31 
   4   3  -6    4.71    0.28 
   4   3  -6    4.33    0.23 
  -4  -3   6    4.48    0.26 
  -4  -3   6    4.79    0.25
[truncated: 599,286 more chars]
