# Supplementary material for: Synthesis, Characterization and DFT Study of a New Family of High-Energy Compounds Based on s-Triazine, Carborane and Tetrazoles
Source: Molecules. 2022 Nov 2;27(21):7484. doi: 10.3390/molecules27217484 (PMC9656522; doi:10.3390/molecules27217484)
Supplement: Supplementary file 1 [file molecules-27-07484-s001.zip › Compound_10.cif]

 
data_a 
  
_audit_creation_method            'SHELXL-2014/7' 
_shelx_SHELXL_version_number      '2014/7' 
_chemical_name_systematic         ? 
_chemical_name_common             ? 
_chemical_melting_point           ? 
_chemical_formula_moiety          
 'C9 H18 B10 N12, C3 H6 O' 
_chemical_formula_sum 
 'C12 H24 B10 N12 O' 
_chemical_formula_weight          460.53 
  
loop_ 
 _atom_type_symbol 
 _atom_type_description 
 _atom_type_scat_dispersion_real 
 _atom_type_scat_dispersion_imag 
 _atom_type_scat_source 
 'C'  'C'   0.0033   0.0016 
 'International Tables Vol C Tables 4.2.6.8 and 6.1.1.4' 
 'H'  'H'   0.0000   0.0000 
 'International Tables Vol C Tables 4.2.6.8 and 6.1.1.4' 
 'B'  'B'   0.0013   0.0007 
 'International Tables Vol C Tables 4.2.6.8 and 6.1.1.4' 
 'N'  'N'   0.0061   0.0033 
 'International Tables Vol C Tables 4.2.6.8 and 6.1.1.4' 
 'O'  'O'   0.0106   0.0060 
 'International Tables Vol C Tables 4.2.6.8 and 6.1.1.4' 
  
_space_group_crystal_system       monoclinic 
_space_group_IT_number            14 
_space_group_name_H-M_alt         'P 21/c' 
_space_group_name_Hall            '-P 2ybc' 
  
_shelx_space_group_comment 
; 
The symmetry employed for this shelxl refinement is uniquely defined 
by the following loop, which should always be used as a source of 
symmetry information in preference to the above space-group names. 
They are only intended as comments. 
; 
  
loop_ 
 _space_group_symop_operation_xyz 
 'x, y, z' 
 '-x, y+1/2, -z+1/2' 
 '-x, -y, -z' 
 'x, -y-1/2, z-1/2' 
  
_cell_length_a                    14.7936(5) 
_cell_length_b                    11.9606(4) 
_cell_length_c                    13.7459(5) 
_cell_angle_alpha                 90 
_cell_angle_beta                  111.6708(12) 
_cell_angle_gamma                 90 
_cell_volume                      2260.30(14) 
_cell_formula_units_Z             4 
_cell_measurement_temperature     100(2) 
_cell_measurement_reflns_used     9928 
_cell_measurement_theta_min       2.33 
_cell_measurement_theta_max       33.99 
  
_exptl_crystal_description        plate 
_exptl_crystal_colour             colourless 
_exptl_crystal_density_meas       ? 
_exptl_crystal_density_method     ? 
_exptl_crystal_density_diffrn     1.353 
_exptl_crystal_F_000              952 
_exptl_transmission_factor_min    ? 
_exptl_transmission_factor_max    ? 
_exptl_crystal_size_max           0.500 
_exptl_crystal_size_mid           0.500 
_exptl_crystal_size_min           0.100 
_exptl_absorpt_coefficient_mu     0.086 
_shelx_estimated_absorpt_T_min    0.958 
_shelx_estimated_absorpt_T_max    0.991 
_exptl_absorpt_correction_type    multi-scan 
_exptl_absorpt_correction_T_min   0.854 
_exptl_absorpt_correction_T_max   0.991 
_exptl_absorpt_process_details    SADABS 
_exptl_absorpt_special_details    ? 
_diffrn_ambient_temperature       100(2) 
_diffrn_radiation_wavelength      0.71073 
_diffrn_radiation_type            MoK\a 
_diffrn_source                    ? 
_diffrn_measurement_device_type   'Bruker APEX-II CCD' 
_diffrn_measurement_method        '\f and \w scans' 
_diffrn_detector_area_resol_mean  ? 
_diffrn_reflns_number             23119 
_diffrn_reflns_av_unetI/netI      0.0300 
_diffrn_reflns_av_R_equivalents   0.0322 
_diffrn_reflns_limit_h_min        -19 
_diffrn_reflns_limit_h_max        19 
_diffrn_reflns_limit_k_min        -14 
_diffrn_reflns_limit_k_max        15 
_diffrn_reflns_limit_l_min        -18 
_diffrn_reflns_limit_l_max        18 
_diffrn_reflns_theta_min          2.257 
_diffrn_reflns_theta_max          27.997 
_diffrn_reflns_theta_full         25.242 
_diffrn_measured_fraction_theta_max   0.998 
_diffrn_measured_fraction_theta_full  0.998 
_diffrn_reflns_Laue_measured_fraction_max    0.998 
_diffrn_reflns_Laue_measured_fraction_full   0.998 
_diffrn_reflns_point_group_measured_fraction_max   0.998 
_diffrn_reflns_point_group_measured_fraction_full  0.998 
_reflns_number_total              5447 
_reflns_number_gt                 4609 
_reflns_threshold_expression      'I > 2\s(I)' 
_reflns_Friedel_coverage          0.000 
_reflns_Friedel_fraction_max      . 
_reflns_Friedel_fraction_full     . 
  
_reflns_special_details 
; 
 Reflections were merged by SHELXL according to the crystal 
 class for the calculation of statistics and refinement. 
  
 _reflns_Friedel_fraction is defined as the number of unique 
 Friedel pairs measured divided by the number that would be 
 possible theoretically, ignoring centric projections and 
 systematic absences. 
; 
  
_computing_data_collection        'Bruker APEX2' 
_computing_cell_refinement        'Bruker SAINT' 
_computing_data_reduction         'Bruker SAINT' 
_computing_structure_solution     'SHELXS-97 (Sheldrick 2008)' 
_computing_structure_refinement 'SHELXL-2014/7 (Sheldrick, 2014)' 
_computing_molecular_graphics     'Bruker SHELXTL' 
_computing_publication_material   'Bruker SHELXTL' 
_refine_special_details           ? 
_refine_ls_structure_factor_coef  Fsqd 
_refine_ls_matrix_type            full 
_refine_ls_weighting_scheme       calc 
_refine_ls_weighting_details 
'w=1/[\s^2^(Fo^2^)+(0.0483P)^2^+0.9414P] where P=(Fo^2^+2Fc^2^)/3' 
_atom_sites_solution_primary      direct
_atom_sites_solution_secondary    ? 
_atom_sites_solution_hydrogens    mixed 
_refine_ls_hydrogen_treatment     mixed 
_refine_ls_extinction_method      none 
_refine_ls_extinction_coef        . 
_refine_ls_number_reflns          5447 
_refine_ls_number_parameters      368 
_refine_ls_number_restraints      0 
_refine_ls_R_factor_all           0.0510 
_refine_ls_R_factor_gt            0.0419 
_refine_ls_wR_factor_ref          0.1038 
_refine_ls_wR_factor_gt           0.0990 
_refine_ls_goodness_of_fit_ref    1.047 
_refine_ls_restrained_S_all       1.047 
_refine_ls_shift/su_max           0.000 
_refine_ls_shift/su_mean          0.000 
  
loop_ 
 _atom_site_label 
 _atom_site_type_symbol 
 _atom_site_fract_x 
 _atom_site_fract_y 
 _atom_site_fract_z 
 _atom_site_U_iso_or_equiv 
 _atom_site_adp_type 
 _atom_site_occupancy 
 _atom_site_site_symmetry_order 
 _atom_site_calc_flag 
 _atom_site_refinement_flags_posn 
 _atom_site_refinement_flags_adp 
 _atom_site_refinement_flags_occupancy 
 _atom_site_disorder_assembly 
 _atom_site_disorder_group 
C1 C -0.34017(9) 0.32976(11) -0.00707(10) 0.0152(2) Uani 1 1 d . . . . . 
H1 H -0.3003(11) 0.3561(13) 0.0604(13) 0.019(4) Uiso 1 1 d . . . . . 
C2 C -0.30094(9) 0.36043(11) -0.10133(10) 0.0153(3) Uani 1 1 d . . . . . 
H2 H -0.2397(12) 0.4039(14) -0.0791(13) 0.026(4) Uiso 1 1 d . . . . . 
B3 B -0.28964(10) 0.22472(12) -0.05664(11) 0.0131(3) Uani 1 1 d . . . . . 
B4 B -0.39637(10) 0.20400(12) -0.02698(11) 0.0149(3) Uani 1 1 d . . . . . 
H4 H -0.3879(11) 0.1532(13) 0.0408(13) 0.022(4) Uiso 1 1 d . . . . . 
B5 B -0.46406(11) 0.33060(13) -0.05122(12) 0.0174(3) Uani 1 1 d . . . . . 
H5 H -0.4967(12) 0.3580(14) 0.0034(13) 0.025(4) Uiso 1 1 d . . . . . 
B6 B -0.39976(11) 0.43229(13) -0.09525(12) 0.0179(3) Uani 1 1 d . . . . . 
H6 H -0.3881(11) 0.5193(14) -0.0722(12) 0.020(4) Uiso 1 1 d . . . . . 
B7 B -0.32738(11) 0.25789(12) -0.19274(11) 0.0158(3) Uani 1 1 d . . . . . 
H7 H -0.2750(11) 0.2425(13) -0.2290(13) 0.023(4) Uiso 1 1 d . . . . . 
B8 B -0.39075(10) 0.15579(12) -0.14765(11) 0.0151(3) Uani 1 1 d . . . . . 
H8 H -0.3835(11) 0.0670(13) -0.1628(12) 0.023(4) Uiso 1 1 d . . . . . 
B9 B -0.49869(10) 0.22062(13) -0.14463(12) 0.0161(3) Uani 1 1 d . . . . . 
H9 H -0.5665(11) 0.1724(13) -0.1601(12) 0.021(4) Uiso 1 1 d . . . . . 
B10 B -0.50100(10) 0.36231(13) -0.18674(12) 0.0166(3) Uani 1 1 d . . . . . 
H10 H -0.5681(11) 0.4081(13) -0.2279(13) 0.022(4) Uiso 1 1 d . . . . . 
B11 B -0.39494(11) 0.38454(13) -0.21620(12) 0.0170(3) Uani 1 1 d . . . . . 
H11 H -0.3853(12) 0.4474(14) -0.2686(13) 0.026(4) Uiso 1 1 d . . . . . 
B12 B -0.45618(11) 0.25393(13) -0.24674(12) 0.0168(3) Uani 1 1 d . . . . . 
H12 H -0.4949(12) 0.2261(14) -0.3297(13) 0.027(4) Uiso 1 1 d . . . . . 
N1 N -0.19737(8) 0.16862(9) 0.00457(8) 0.0144(2) Uani 1 1 d . . . . . 
H1N H -0.1959(13) 0.0911(16) 0.0010(14) 0.032(5) Uiso 1 1 d . . . . . 
N2 N -0.10401(7) 0.32680(9) 0.06792(8) 0.0136(2) Uani 1 1 d . . . . . 
N3 N 0.06136(7) 0.30221(9) 0.18195(8) 0.0137(2) Uani 1 1 d . . . . . 
N4 N -0.03821(7) 0.14219(9) 0.11406(8) 0.0136(2) Uani 1 1 d . . . . . 
N5 N -0.00084(7) 0.47854(9) 0.12806(8) 0.0130(2) Uani 1 1 d . . . . . 
N6 N -0.06945(8) 0.54806(9) 0.06081(8) 0.0160(2) Uani 1 1 d . . . . . 
N7 N -0.03202(8) 0.64639(9) 0.07693(9) 0.0186(2) Uani 1 1 d . . . . . 
N8 N 0.06007(8) 0.64535(9) 0.15286(9) 0.0181(2) Uani 1 1 d . . . . . 
N9 N 0.12086(7) 0.12326(9) 0.23098(8) 0.0135(2) Uani 1 1 d . . . . . 
N10 N 0.19968(8) 0.16806(9) 0.31020(9) 0.0173(2) Uani 1 1 d . . . . . 
N11 N 0.25619(8) 0.08561(10) 0.35117(9) 0.0200(2) Uani 1 1 d . . . . . 
N12 N 0.21832(8) -0.01372(9) 0.30187(9) 0.0183(2) Uani 1 1 d . . . . . 
C13 C -0.11196(9) 0.21392(10) 0.06287(9) 0.0127(2) Uani 1 1 d . . . . . 
C14 C -0.01632(9) 0.36141(10) 0.12563(9) 0.0125(2) Uani 1 1 d . . . . . 
C15 C 0.04271(9) 0.19308(10) 0.17156(9) 0.0129(2) Uani 1 1 d . . . . . 
C16 C 0.07881(9) 0.54111(11) 0.18345(10) 0.0145(2) Uani 1 1 d . . . . . 
C17 C 0.13479(9) 0.01079(10) 0.22773(10) 0.0141(2) Uani 1 1 d . . . . . 
C18 C 0.17082(9) 0.50215(11) 0.26500(11) 0.0188(3) Uani 1 1 d . . . . . 
H18A H 0.2130 0.5665 0.2946 0.028 Uiso 1 1 calc R U . . . 
H18B H 0.2038 0.4505 0.2337 0.028 Uiso 1 1 calc R U . . . 
H18C H 0.1564 0.4637 0.3206 0.028 Uiso 1 1 calc R U . . . 
C19 C 0.07003(9) -0.07055(11) 0.15263(10) 0.0171(3) Uani 1 1 d . . . . . 
H19A H 0.0999 -0.1449 0.1662 0.026 Uiso 1 1 calc R U . . . 
H19B H 0.0603 -0.0477 0.0810 0.026 Uiso 1 1 calc R U . . . 
H19C H 0.0071 -0.0728 0.1610 0.026 Uiso 1 1 calc R U . . . 
O1S O 0.19731(7) 0.07300(8) 0.03324(8) 0.0228(2) Uani 1 1 d . . . . . 
C1S C 0.25856(9) 0.14430(11) 0.03908(10) 0.0165(3) Uani 1 1 d . . . . . 
C2S C 0.25840(10) 0.25559(11) 0.08895(11) 0.0195(3) Uani 1 1 d . . . . . 
H2SA H 0.1964 0.2660 0.0984 0.029 Uiso 1 1 calc R U . . . 
H2SB H 0.2667 0.3150 0.0439 0.029 Uiso 1 1 calc R U . . . 
H2SC H 0.3119 0.2586 0.1572 0.029 Uiso 1 1 calc R U . . . 
C3S C 0.33714(10) 0.12508(12) -0.00334(11) 0.0209(3) Uani 1 1 d . . . . . 
H3SA H 0.3326 0.0485 -0.0300 0.031 Uiso 1 1 calc R U . . . 
H3SB H 0.4008 0.1362 0.0525 0.031 Uiso 1 1 calc R U . . . 
H3SC H 0.3294 0.1780 -0.0603 0.031 Uiso 1 1 calc R U . . . 
  
loop_ 
 _atom_site_aniso_label 
 _atom_site_aniso_U_11 
 _atom_site_aniso_U_22 
 _atom_site_aniso_U_33 
 _atom_site_aniso_U_23 
 _atom_site_aniso_U_13 
 _atom_site_aniso_U_12 
C1 0.0170(6) 0.0161(6) 0.0108(6) -0.0012(5) 0.0031(5) 0.0009(5) 
C2 0.0148(6) 0.0141(6) 0.0156(6) 0.0017(5) 0.0039(5) -0.0014(5) 
B3 0.0143(6) 0.0121(6) 0.0118(6) -0.0012(5) 0.0034(5) -0.0009(5) 
B4 0.0151(6) 0.0164(7) 0.0130(7) 0.0006(5) 0.0048(5) -0.0009(5) 
B5 0.0186(7) 0.0200(7) 0.0149(7) 0.0006(6) 0.0077(6) 0.0030(6) 
B6 0.0187(7) 0.0155(7) 0.0180(7) 0.0012(5) 0.0049(6) 0.0033(5) 
B7 0.0163(7) 0.0185(7) 0.0127(7) 0.0014(5) 0.0053(6) 0.0021(5) 
B8 0.0145(6) 0.0162(7) 0.0129(7) -0.0017(5) 0.0032(5) -0.0001(5) 
B9 0.0143(6) 0.0183(7) 0.0149(7) 0.0010(5) 0.0043(6) -0.0003(5) 
B10 0.0150(7) 0.0196(7) 0.0144(7) 0.0015(5) 0.0045(6) 0.0019(5) 
B11 0.0160(7) 0.0197(7) 0.0145(7) 0.0041(6) 0.0048(6) 0.0021(5) 
B12 0.0168(7) 0.0203(7) 0.0117(7) 0.0003(5) 0.0032(6) 0.0014(5) 
N1 0.0148(5) 0.0114(5) 0.0144(5) -0.0011(4) 0.0023(4) -0.0006(4) 
N2 0.0150(5) 0.0126(5) 0.0124(5) 0.0002(4) 0.0042(4) 0.0007(4) 
N3 0.0147(5) 0.0135(5) 0.0122(5) 0.0002(4) 0.0043(4) 0.0002(4) 
N4 0.0137(5) 0.0143(5) 0.0121(5) -0.0001(4) 0.0038(4) 0.0005(4) 
N5 0.0145(5) 0.0127(5) 0.0113(5) 0.0010(4) 0.0043(4) 0.0013(4) 
N6 0.0198(5) 0.0138(5) 0.0142(5) 0.0036(4) 0.0060(4) 0.0037(4) 
N7 0.0226(6) 0.0160(6) 0.0173(6) 0.0013(4) 0.0075(5) 0.0003(4) 
N8 0.0213(6) 0.0164(6) 0.0167(5) 0.0012(4) 0.0071(5) -0.0006(4) 
N9 0.0135(5) 0.0134(5) 0.0122(5) 0.0001(4) 0.0029(4) -0.0003(4) 
N10 0.0146(5) 0.0204(6) 0.0127(5) 0.0010(4) 0.0002(4) -0.0003(4) 
N11 0.0185(6) 0.0214(6) 0.0168(6) 0.0028(4) 0.0027(5) 0.0022(4) 
N12 0.0185(5) 0.0191(6) 0.0163(6) 0.0033(4) 0.0054(5) 0.0029(4) 
C13 0.0147(6) 0.0141(6) 0.0100(6) 0.0000(4) 0.0053(5) 0.0010(4) 
C14 0.0161(6) 0.0129(6) 0.0100(6) -0.0005(4) 0.0068(5) 0.0001(4) 
C15 0.0140(6) 0.0154(6) 0.0098(6) 0.0015(4) 0.0050(5) 0.0022(4) 
C16 0.0180(6) 0.0147(6) 0.0131(6) -0.0019(5) 0.0085(5) -0.0023(5) 
C17 0.0170(6) 0.0142(6) 0.0133(6) 0.0032(5) 0.0080(5) 0.0026(5) 
C18 0.0174(6) 0.0168(6) 0.0194(7) -0.0009(5) 0.0033(5) -0.0026(5) 
C19 0.0198(6) 0.0139(6) 0.0171(6) -0.0009(5) 0.0064(5) 0.0016(5) 
O1S 0.0219(5) 0.0182(5) 0.0293(6) -0.0002(4) 0.0104(4) -0.0034(4) 
C1S 0.0165(6) 0.0178(6) 0.0124(6) 0.0033(5) 0.0019(5) 0.0011(5) 
C2S 0.0198(6) 0.0180(7) 0.0206(7) -0.0006(5) 0.0071(6) -0.0016(5) 
C3S 0.0207(7) 0.0232(7) 0.0196(7) -0.0005(5) 0.0083(6) -0.0008(5) 
  
_geom_special_details 
; 
 All esds (except the esd in the dihedral angle between two l.s. planes) 
 are estimated using the full covariance matrix.  The cell esds are taken 
 into account individually in the estimation of esds in distances, angles 
 and torsion angles; correlations between esds in cell parameters are only 
 used when they are defined by crystal symmetry.  An approximate (isotropic) 
 treatment of cell esds is used for estimating esds involving l.s. planes. 
; 
  
loop_ 
 _geom_bond_atom_site_label_1 
 _geom_bond_atom_site_label_2 
 _geom_bond_distance 
 _geom_bond_site_symmetry_2 
 _geom_bond_publ_flag 
C1 C2 1.6448(18) . ? 
C1 B4 1.6914(19) . ? 
C1 B5 1.7048(19) . ? 
C1 B6 1.721(2) . ? 
C1 B3 1.7256(19) . ? 
C1 H1 0.950(16) . ? 
C2 B7 1.695(2) . ? 
C2 B11 1.6995(19) . ? 
C2 B3 1.7216(19) . ? 
C2 B6 1.724(2) . ? 
C2 H2 0.990(17) . ? 
B3 N1 1.4742(17) . ? 
B3 B8 1.761(2) . ? 
B3 B4 1.788(2) . ? 
B3 B7 1.788(2) . ? 
B4 B9 1.772(2) . ? 
B4 B5 1.778(2) . ? 
B4 B8 1.787(2) . ? 
B4 H4 1.080(16) . ? 
B5 B9 1.776(2) . ? 
B5 B10 1.778(2) . ? 
B5 B6 1.782(2) . ? 
B5 H5 1.083(17) . ? 
B6 B10 1.770(2) . ? 
B6 B11 1.784(2) . ? 
B6 H6 1.083(16) . ? 
B7 B12 1.772(2) . ? 
B7 B11 1.778(2) . ? 
B7 B8 1.784(2) . ? 
B7 H7 1.080(16) . ? 
B8 B12 1.788(2) . ? 
B8 B9 1.789(2) . ? 
B8 H8 1.095(16) . ? 
B9 B12 1.782(2) . ? 
B9 B10 1.787(2) . ? 
B9 H9 1.108(15) . ? 
B10 B11 1.779(2) . ? 
B10 B12 1.790(2) . ? 
B10 H10 1.091(16) . ? 
B11 B12 1.777(2) . ? 
B11 H11 1.086(17) . ? 
B12 H12 1.121(17) . ? 
N1 C13 1.3359(16) . ? 
N1 H1N 0.929(19) . ? 
N2 C14 1.3129(16) . ? 
N2 C13 1.3547(16) . ? 
N3 C14 1.3283(16) . ? 
N3 C15 1.3308(16) . ? 
N4 C15 1.3151(16) . ? 
N4 C13 1.3619(15) . ? 
N5 C16 1.3659(16) . ? 
N5 N6 1.3722(14) . ? 
N5 C14 1.4179(16) . ? 
N6 N7 1.2838(15) . ? 
N7 N8 1.3768(16) . ? 
N8 C16 1.3123(17) . ? 
N9 C17 1.3642(16) . ? 
N9 N10 1.3765(14) . ? 
N9 C15 1.4156(15) . ? 
N10 N11 1.2810(15) . ? 
N11 N12 1.3798(16) . ? 
N12 C17 1.3120(17) . ? 
C16 C18 1.4831(18) . ? 
C17 C19 1.4831(18) . ? 
C18 H18A 0.9800 . ? 
C18 H18B 0.9800 . ? 
C18 H18C 0.9800 . ? 
C19 H19A 0.9800 . ? 
C19 H19B 0.9800 . ? 
C19 H19C 0.9800 . ? 
O1S C1S 1.2251(16) . ? 
C1S C2S 1.4977(18) . ? 
C1S C3S 1.4982(18) . ? 
C2S H2SA 0.9800 . ? 
C2S H2SB 0.9800 . ? 
C2S H2SC 0.9800 . ? 
C3S H3SA 0.9800 . ? 
C3S H3SB 0.9800 . ? 
C3S H3SC 0.9800 . ? 
  
loop_ 
 _geom_angle_atom_site_label_1 
 _geom_angle_atom_site_label_2 
 _geom_angle_atom_site_label_3 
 _geom_angle 
 _geom_angle_site_symmetry_1 
 _geom_angle_site_symmetry_3 
 _geom_angle_publ_flag 
C2 C1 B4 111.48(10) . . ? 
C2 C1 B5 111.34(10) . . ? 
B4 C1 B5 63.13(8) . . ? 
C2 C1 B6 61.59(8) . . ? 
B4 C1 B6 115.24(10) . . ? 
B5 C1 B6 62.69(8) . . ? 
C2 C1 B3 61.38(8) . . ? 
B4 C1 B3 63.08(8) . . ? 
B5 C1 B3 115.42(10) . . ? 
B6 C1 B3 115.13(10) . . ? 
C2 C1 H1 115.0(9) . . ? 
B4 C1 H1 122.9(9) . . ? 
B5 C1 H1 122.9(9) . . ? 
B6 C1 H1 115.0(9) . . ? 
B3 C1 H1 115.0(9) . . ? 
C1 C2 B7 111.76(10) . . ? 
C1 C2 B11 111.36(10) . . ? 
B7 C2 B11 63.15(9) . . ? 
C1 C2 B3 61.62(8) . . ? 
B7 C2 B3 63.11(8) . . ? 
B11 C2 B3 115.46(10) . . ? 
C1 C2 B6 61.38(8) . . ? 
B7 C2 B6 115.40(10) . . ? 
B11 C2 B6 62.81(9) . . ? 
B3 C2 B6 115.15(10) . . ? 
C1 C2 H2 115.0(10) . . ? 
B7 C2 H2 122.8(10) . . ? 
B11 C2 H2 122.6(10) . . ? 
B3 C2 H2 115.3(10) . . ? 
B6 C2 H2 114.8(10) . . ? 
N1 B3 C2 125.47(11) . . ? 
N1 B3 C1 123.42(11) . . ? 
C2 B3 C1 57.00(7) . . ? 
N1 B3 B8 123.85(11) . . ? 
C2 B3 B8 104.06(10) . . ? 
C1 B3 B8 104.08(9) . . ? 
N1 B3 B4 121.09(11) . . ? 
C2 B3 B4 103.56(10) . . ? 
C1 B3 B4 57.52(8) . . ? 
B8 B3 B4 60.46(8) . . ? 
N1 B3 B7 124.31(11) . . ? 
C2 B3 B7 57.72(8) . . ? 
C1 B3 B7 103.78(10) . . ? 
B8 B3 B7 60.36(8) . . ? 
B4 B3 B7 107.97(10) . . ? 
C1 B4 B9 104.55(10) . . ? 
C1 B4 B5 58.80(8) . . ? 
B9 B4 B5 60.07(8) . . ? 
C1 B4 B8 104.40(10) . . ? 
B9 B4 B8 60.38(8) . . ? 
B5 B4 B8 108.48(10) . . ? 
C1 B4 B3 59.39(8) . . ? 
B9 B4 B3 107.76(10) . . ? 
B5 B4 B3 108.84(10) . . ? 
B8 B4 B3 59.02(8) . . ? 
C1 B4 H4 117.8(8) . . ? 
B9 B4 H4 129.7(8) . . ? 
B5 B4 H4 121.2(8) . . ? 
B8 B4 H4 126.1(8) . . ? 
B3 B4 H4 116.3(8) . . ? 
C1 B5 B9 103.78(10) . . ? 
C1 B5 B4 58.07(8) . . ? 
B9 B5 B4 59.79(8) . . ? 
C1 B5 B10 104.38(10) . . ? 
B9 B5 B10 60.37(8) . . ? 
B4 B5 B10 108.18(10) . . ? 
C1 B5 B6 59.09(8) . . ? 
B9 B5 B6 107.91(10) . . ? 
B4 B5 B6 108.10(10) . . ? 
B10 B5 B6 59.64(8) . . ? 
C1 B5 H5 116.8(9) . . ? 
B9 B5 H5 129.9(9) . . ? 
B4 B5 H5 119.5(9) . . ? 
B10 B5 H5 128.2(9) . . ? 
B6 B5 H5 117.4(9) . . ? 
C1 B6 C2 57.04(8) . . ? 
C1 B6 B10 104.03(10) . . ? 
C2 B6 B10 103.88(10) . . ? 
C1 B6 B5 58.21(8) . . ? 
C2 B6 B5 104.16(10) . . ? 
B10 B6 B5 60.06(8) . . ? 
C1 B6 B11 104.00(10) . . ? 
C2 B6 B11 57.92(8) . . ? 
B10 B6 B11 60.07(9) . . ? 
B5 B6 B11 107.94(11) . . ? 
C1 B6 H6 119.6(8) . . ? 
C2 B6 H6 116.6(8) . . ? 
B10 B6 H6 131.6(8) . . ? 
B5 B6 H6 127.1(8) . . ? 
B11 B6 H6 121.6(8) . . ? 
C2 B7 B12 104.35(10) . . ? 
C2 B7 B11 58.55(8) . . ? 
B12 B7 B11 60.08(8) . . ? 
C2 B7 B8 104.16(10) . . ? 
B12 B7 B8 60.36(8) . . ? 
B11 B7 B8 108.30(10) . . ? 
C2 B7 B3 59.17(8) . . ? 
B12 B7 B3 107.71(10) . . ? 
B11 B7 B3 108.44(10) . . ? 
B8 B7 B3 59.06(8) . . ? 
C2 B7 H7 117.2(8) . . ? 
B12 B7 H7 130.2(9) . . ? 
B11 B7 H7 120.8(8) . . ? 
B8 B7 H7 127.0(8) . . ? 
B3 B7 H7 116.4(9) . . ? 
B3 B8 B7 60.58(8) . . ? 
B3 B8 B4 60.52(8) . . ? 
B7 B8 B4 108.19(10) . . ? 
B3 B8 B12 108.23(10) . . ? 
B7 B8 B12 59.48(8) . . ? 
B4 B8 B12 107.32(10) . . ? 
B3 B8 B9 108.17(10) . . ? 
B7 B8 B9 107.42(10) . . ? 
B4 B8 B9 59.39(8) . . ? 
B12 B8 B9 59.76(8) . . ? 
B3 B8 H8 118.1(8) . . ? 
B7 B8 H8 119.8(8) . . ? 
B4 B8 H8 122.1(8) . . ? 
B12 B8 H8 123.7(8) . . ? 
B9 B8 H8 125.2(8) . . ? 
B4 B9 B5 60.14(8) . . ? 
B4 B9 B12 108.24(10) . . ? 
B5 B9 B12 108.20(10) . . ? 
B4 B9 B10 108.05(10) . . ? 
B5 B9 B10 59.86(8) . . ? 
B12 B9 B10 60.20(8) . . ? 
B4 B9 B8 60.23(8) . . ? 
B5 B9 B8 108.42(10) . . ? 
B12 B9 B8 60.07(8) . . ? 
B10 B9 B8 108.30(10) . . ? 
B4 B9 H9 121.6(8) . . ? 
B5 B9 H9 121.5(8) . . ? 
B12 B9 H9 121.6(8) . . ? 
B10 B9 H9 121.6(8) . . ? 
B8 B9 H9 121.5(8) . . ? 
B6 B10 B5 60.29(9) . . ? 
B6 B10 B11 60.35(8) . . ? 
B5 B10 B11 108.34(10) . . ? 
B6 B10 B9 107.96(10) . . ? 
B5 B10 B9 59.78(8) . . ? 
B11 B10 B9 107.61(10) . . ? 
B6 B10 B12 108.04(10) . . ? 
B5 B10 B12 107.79(10) . . ? 
B11 B10 B12 59.71(8) . . ? 
B9 B10 B12 59.76(8) . . ? 
B6 B10 H10 120.0(8) . . ? 
B5 B10 H10 121.2(9) . . ? 
B11 B10 H10 121.2(8) . . ? 
B9 B10 H10 123.3(8) . . ? 
B12 B10 H10 123.1(8) . . ? 
C2 B11 B12 103.95(10) . . ? 
C2 B11 B7 58.30(8) . . ? 
B12 B11 B7 59.80(8) . . ? 
C2 B11 B10 104.53(10) . . ? 
B12 B11 B10 60.45(8) . . ? 
B7 B11 B10 108.38(10) . . ? 
C2 B11 B6 59.27(8) . . ? 
B12 B11 B6 108.01(10) . . ? 
B7 B11 B6 108.48(10) . . ? 
B10 B11 B6 59.58(8) . . ? 
C2 B11 H11 118.1(9) . . ? 
B12 B11 H11 129.2(9) . . ? 
B7 B11 H11 120.5(9) . . ? 
B10 B11 H11 126.7(9) . . ? 
B6 B11 H11 117.2(9) . . ? 
B7 B12 B11 60.12(8) . . ? 
B7 B12 B9 108.29(10) . . ? 
B11 B12 B9 107.93(10) . . ? 
B7 B12 B8 60.16(8) . . ? 
B11 B12 B8 108.17(10) . . ? 
B9 B12 B8 60.16(8) . . ? 
B7 B12 B10 108.16(10) . . ? 
B11 B12 B10 59.85(8) . . ? 
B9 B12 B10 60.04(8) . . ? 
B8 B12 B10 108.24(10) . . ? 
B7 B12 H12 120.1(8) . . ? 
B11 B12 H12 121.7(9) . . ? 
B9 B12 H12 122.6(9) . . ? 
B8 B12 H12 120.7(9) . . ? 
B10 B12 H12 123.1(8) . . ? 
C13 N1 B3 128.99(11) . . ? 
C13 N1 H1N 113.6(11) . . ? 
B3 N1 H1N 117.3(11) . . ? 
C14 N2 C13 113.14(10) . . ? 
C14 N3 C15 111.09(10) . . ? 
C15 N4 C13 113.37(11) . . ? 
C16 N5 N6 108.34(10) . . ? 
C16 N5 C14 130.77(11) . . ? 
N6 N5 C14 120.67(10) . . ? 
N7 N6 N5 105.92(10) . . ? 
N6 N7 N8 111.44(10) . . ? 
C16 N8 N7 106.51(11) . . ? 
C17 N9 N10 108.41(10) . . ? 
C17 N9 C15 131.60(11) . . ? 
N10 N9 C15 119.97(10) . . ? 
N11 N10 N9 105.83(10) . . ? 
N10 N11 N12 111.48(11) . . ? 
C17 N12 N11 106.52(11) . . ? 
N1 C13 N2 118.68(11) . . ? 
N1 C13 N4 117.02(11) . . ? 
N2 C13 N4 124.30(11) . . ? 
N2 C14 N3 129.29(12) . . ? 
N2 C14 N5 116.15(11) . . ? 
N3 C14 N5 114.56(10) . . ? 
N4 C15 N3 128.69(11) . . ? 
N4 C15 N9 116.23(11) . . ? 
N3 C15 N9 115.08(11) . . ? 
N8 C16 N5 107.78(11) . . ? 
N8 C16 C18 124.54(12) . . ? 
N5 C16 C18 127.68(11) . . ? 
N12 C17 N9 107.77(11) . . ? 
N12 C17 C19 125.11(12) . . ? 
N9 C17 C19 127.10(11) . . ? 
C16 C18 H18A 109.5 . . ? 
C16 C18 H18B 109.5 . . ? 
H18A C18 H18B 109.5 . . ? 
C16 C18 H18C 109.5 . . ? 
H18A C18 H18C 109.5 . . ? 
H18B C18 H18C 109.5 . . ? 
C17 C19 H19A 109.5 . . ? 
C17 C19 H19B 109.5 . . ? 
H19A C19 H19B 109.5 . . ? 
C17 C19 H19C 109.5 . . ? 
H19A C19 H19C 109.5 . . ? 
H19B C19 H19C 109.5 . . ? 
O1S C1S C2S 121.50(12) . . ? 
O1S C1S C3S 121.94(12) . . ? 
C2S C1S C3S 116.55(11) . . ? 
C1S C2S H2SA 109.5 . . ? 
C1S C2S H2SB 109.5 . . ? 
H2SA C2S H2SB 109.5 . . ? 
C1S C2S H2SC 109.5 . . ? 
H2SA C2S H2SC 109.5 . . ? 
H2SB C2S H2SC 109.5 . . ? 
C1S C3S H3SA 109.5 . . ? 
C1S C3S H3SB 109.5 . . ? 
H3SA C3S H3SB 109.5 . . ? 
C1S C3S H3SC 109.5 . . ? 
H3SA C3S H3SC 109.5 . . ? 
H3SB C3S H3SC 109.5 . . ? 
  
loop_ 
 _geom_torsion_atom_site_label_1 
 _geom_torsion_atom_site_label_2 
 _geom_torsion_atom_site_label_3 
 _geom_torsion_atom_site_label_4 
 _geom_torsion 
 _geom_torsion_site_symmetry_1 
 _geom_torsion_site_symmetry_2 
 _geom_torsion_site_symmetry_3 
 _geom_torsion_site_symmetry_4 
 _geom_torsion_publ_flag 
B4 C1 C2 B7 -0.02(14) . . . . ? 
B5 C1 C2 B7 -68.44(13) . . . . ? 
B6 C1 C2 B7 -107.96(11) . . . . ? 
B3 C1 C2 B7 39.73(10) . . . . ? 
B4 C1 C2 B11 68.51(13) . . . . ? 
B5 C1 C2 B11 0.09(14) . . . . ? 
B6 C1 C2 B11 -39.43(10) . . . . ? 
B3 C1 C2 B11 108.26(11) . . . . ? 
B4 C1 C2 B3 -39.74(10) . . . . ? 
B5 C1 C2 B3 -108.17(11) . . . . ? 
B6 C1 C2 B3 -147.69(10) . . . . ? 
B4 C1 C2 B6 107.95(11) . . . . ? 
B5 C1 C2 B6 39.53(10) . . . . ? 
B3 C1 C2 B6 147.69(10) . . . . ? 
C1 C2 B3 N1 -110.10(13) . . . . ? 
B7 C2 B3 N1 111.62(14) . . . . ? 
B11 C2 B3 N1 148.29(12) . . . . ? 
B6 C2 B3 N1 -141.32(12) . . . . ? 
B7 C2 B3 C1 -138.27(10) . . . . ? 
B11 C2 B3 C1 -101.61(11) . . . . ? 
B6 C2 B3 C1 -31.22(10) . . . . ? 
C1 C2 B3 B8 97.84(10) . . . . ? 
B7 C2 B3 B8 -40.43(9) . . . . ? 
B11 C2 B3 B8 -3.77(13) . . . . ? 
B6 C2 B3 B8 66.63(12) . . . . ? 
C1 C2 B3 B4 35.38(9) . . . . ? 
B7 C2 B3 B4 -102.89(10) . . . . ? 
B11 C2 B3 B4 -66.23(12) . . . . ? 
B6 C2 B3 B4 4.17(13) . . . . ? 
C1 C2 B3 B7 138.27(10) . . . . ? 
B11 C2 B3 B7 36.66(10) . . . . ? 
B6 C2 B3 B7 107.06(11) . . . . ? 
C2 C1 B3 N1 113.60(13) . . . . ? 
B4 C1 B3 N1 -108.26(13) . . . . ? 
B5 C1 B3 N1 -144.89(12) . . . . ? 
B6 C1 B3 N1 144.88(12) . . . . ? 
B4 C1 B3 C2 138.15(10) . . . . ? 
B5 C1 B3 C2 101.52(11) . . . . ? 
B6 C1 B3 C2 31.28(10) . . . . ? 
C2 C1 B3 B8 -97.80(10) . . . . ? 
B4 C1 B3 B8 40.35(9) . . . . ? 
B5 C1 B3 B8 3.72(13) . . . . ? 
B6 C1 B3 B8 -66.52(12) . . . . ? 
C2 C1 B3 B4 -138.15(10) . . . . ? 
B5 C1 B3 B4 -36.63(10) . . . . ? 
B6 C1 B3 B4 -106.87(12) . . . . ? 
C2 C1 B3 B7 -35.41(9) . . . . ? 
B4 C1 B3 B7 102.74(10) . . . . ? 
B5 C1 B3 B7 66.11(12) . . . . ? 
B6 C1 B3 B7 -4.13(13) . . . . ? 
C2 C1 B4 B9 -63.27(12) . . . . ? 
B5 C1 B4 B9 40.55(9) . . . . ? 
B6 C1 B4 B9 4.41(14) . . . . ? 
B3 C1 B4 B9 -102.28(10) . . . . ? 
C2 C1 B4 B5 -103.83(11) . . . . ? 
B6 C1 B4 B5 -36.15(10) . . . . ? 
B3 C1 B4 B5 -142.83(10) . . . . ? 
C2 C1 B4 B8 -0.70(13) . . . . ? 
B5 C1 B4 B8 103.13(10) . . . . ? 
B6 C1 B4 B8 66.98(13) . . . . ? 
B3 C1 B4 B8 -39.71(9) . . . . ? 
C2 C1 B4 B3 39.01(9) . . . . ? 
B5 C1 B4 B3 142.83(10) . . . . ? 
B6 C1 B4 B3 106.69(11) . . . . ? 
N1 B3 B4 C1 112.25(13) . . . . ? 
C2 B3 B4 C1 -35.14(9) . . . . ? 
B8 B3 B4 C1 -133.80(10) . . . . ? 
B7 B3 B4 C1 -95.19(10) . . . . ? 
N1 B3 B4 B9 -151.04(11) . . . . ? 
C2 B3 B4 B9 61.57(12) . . . . ? 
C1 B3 B4 B9 96.72(11) . . . . ? 
B8 B3 B4 B9 -37.08(10) . . . . ? 
B7 B3 B4 B9 1.53(13) . . . . ? 
N1 B3 B4 B5 145.34(11) . . . . ? 
C2 B3 B4 B5 -2.05(13) . . . . ? 
C1 B3 B4 B5 33.09(9) . . . . ? 
B8 B3 B4 B5 -100.71(11) . . . . ? 
B7 B3 B4 B5 -62.09(12) . . . . ? 
N1 B3 B4 B8 -113.95(13) . . . . ? 
C2 B3 B4 B8 98.66(10) . . . . ? 
C1 B3 B4 B8 133.80(10) . . . . ? 
B7 B3 B4 B8 38.61(10) . . . . ? 
C2 C1 B5 B9 63.80(12) . . . . ? 
B4 C1 B5 B9 -40.25(9) . . . . ? 
B6 C1 B5 B9 102.84(11) . . . . ? 
B3 C1 B5 B9 -3.64(14) . . . . ? 
C2 C1 B5 B4 104.05(11) . . . . ? 
B6 C1 B5 B4 143.10(11) . . . . ? 
B3 C1 B5 B4 36.61(10) . . . . ? 
C2 C1 B5 B10 1.36(14) . . . . ? 
B4 C1 B5 B10 -102.69(11) . . . . ? 
B6 C1 B5 B10 40.40(10) . . . . ? 
B3 C1 B5 B10 -66.08(13) . . . . ? 
C2 C1 B5 B6 -39.05(10) . . . . ? 
B4 C1 B5 B6 -143.10(11) . . . . ? 
B3 C1 B5 B6 -106.48(11) . . . . ? 
B9 B4 B5 C1 -133.43(10) . . . . ? 
B8 B4 B5 C1 -95.98(10) . . . . ? 
B3 B4 B5 C1 -33.32(9) . . . . ? 
C1 B4 B5 B9 133.43(10) . . . . ? 
B8 B4 B5 B9 37.46(10) . . . . ? 
B3 B4 B5 B9 100.11(11) . . . . ? 
C1 B4 B5 B10 95.93(11) . . . . ? 
B9 B4 B5 B10 -37.50(10) . . . . ? 
B8 B4 B5 B10 -0.04(13) . . . . ? 
B3 B4 B5 B10 62.61(13) . . . . ? 
C1 B4 B5 B6 32.82(10) . . . . ? 
B9 B4 B5 B6 -100.61(11) . . . . ? 
B8 B4 B5 B6 -63.15(13) . . . . ? 
B3 B4 B5 B6 -0.50(14) . . . . ? 
B4 C1 B6 C2 -101.84(11) . . . . ? 
B5 C1 B6 C2 -138.15(10) . . . . ? 
B3 C1 B6 C2 -31.21(10) . . . . ? 
C2 C1 B6 B10 97.62(11) . . . . ? 
B4 C1 B6 B10 -4.22(14) . . . . ? 
B5 C1 B6 B10 -40.53(10) . . . . ? 
B3 C1 B6 B10 66.41(13) . . . . ? 
C2 C1 B6 B5 138.15(10) . . . . ? 
B4 C1 B6 B5 36.31(10) . . . . ? 
B3 C1 B6 B5 106.94(11) . . . . ? 
C2 C1 B6 B11 35.50(9) . . . . ? 
B4 C1 B6 B11 -66.34(13) . . . . ? 
B5 C1 B6 B11 -102.65(11) . . . . ? 
B3 C1 B6 B11 4.29(14) . . . . ? 
B7 C2 B6 C1 102.02(11) . . . . ? 
B11 C2 B6 C1 138.31(11) . . . . ? 
B3 C2 B6 C1 31.30(10) . . . . ? 
C1 C2 B6 B10 -97.90(11) . . . . ? 
B7 C2 B6 B10 4.13(14) . . . . ? 
B11 C2 B6 B10 40.42(10) . . . . ? 
B3 C2 B6 B10 -66.60(13) . . . . ? 
C1 C2 B6 B5 -35.79(9) . . . . ? 
B7 C2 B6 B5 66.23(13) . . . . ? 
B11 C2 B6 B5 102.52(11) . . . . ? 
B3 C2 B6 B5 -4.49(14) . . . . ? 
C1 C2 B6 B11 -138.31(11) . . . . ? 
B7 C2 B6 B11 -36.29(11) . . . . ? 
B3 C2 B6 B11 -107.01(11) . . . . ? 
B9 B5 B6 C1 -95.64(11) . . . . ? 
B4 B5 B6 C1 -32.42(10) . . . . ? 
B10 B5 B6 C1 -133.31(11) . . . . ? 
C1 B5 B6 C2 35.26(9) . . . . ? 
B9 B5 B6 C2 -60.38(12) . . . . ? 
B4 B5 B6 C2 2.84(13) . . . . ? 
B10 B5 B6 C2 -98.05(11) . . . . ? 
C1 B5 B6 B10 133.31(11) . . . . ? 
B9 B5 B6 B10 37.68(10) . . . . ? 
B4 B5 B6 B10 100.89(11) . . . . ? 
C1 B5 B6 B11 95.65(11) . . . . ? 
B9 B5 B6 B11 0.02(13) . . . . ? 
B4 B5 B6 B11 63.23(13) . . . . ? 
B10 B5 B6 B11 -37.66(10) . . . . ? 
C1 C2 B7 B12 63.21(12) . . . . ? 
B11 C2 B7 B12 -40.52(9) . . . . ? 
B3 C2 B7 B12 102.30(10) . . . . ? 
B6 C2 B7 B12 -4.37(14) . . . . ? 
C1 C2 B7 B11 103.74(11) . . . . ? 
B3 C2 B7 B11 142.82(10) . . . . ? 
B6 C2 B7 B11 36.16(10) . . . . ? 
C1 C2 B7 B8 0.72(13) . . . . ? 
B11 C2 B7 B8 -103.01(10) . . . . ? 
B3 C2 B7 B8 39.81(9) . . . . ? 
B6 C2 B7 B8 -66.86(13) . . . . ? 
C1 C2 B7 B3 -39.09(9) . . . . ? 
B11 C2 B7 B3 -142.82(10) . . . . ? 
B6 C2 B7 B3 -106.67(11) . . . . ? 
N1 B3 B7 C2 -113.57(13) . . . . ? 
C1 B3 B7 C2 35.08(9) . . . . ? 
B8 B3 B7 C2 133.63(10) . . . . ? 
B4 B3 B7 C2 94.97(10) . . . . ? 
N1 B3 B7 B12 149.98(12) . . . . ? 
C2 B3 B7 B12 -96.46(11) . . . . ? 
C1 B3 B7 B12 -61.38(12) . . . . ? 
B8 B3 B7 B12 37.17(10) . . . . ? 
B4 B3 B7 B12 -1.48(13) . . . . ? 
N1 B3 B7 B11 -146.48(12) . . . . ? 
C2 B3 B7 B11 -32.91(9) . . . . ? 
C1 B3 B7 B11 2.17(13) . . . . ? 
B8 B3 B7 B11 100.72(11) . . . . ? 
B4 B3 B7 B11 62.06(12) . . . . ? 
N1 B3 B7 B8 112.80(13) . . . . ? 
C2 B3 B7 B8 -133.63(10) . . . . ? 
C1 B3 B7 B8 -98.55(10) . . . . ? 
B4 B3 B7 B8 -38.66(10) . . . . ? 
N1 B3 B8 B7 -113.53(13) . . . . ? 
C2 B3 B8 B7 39.11(9) . . . . ? 
C1 B3 B8 B7 98.04(10) . . . . ? 
B4 B3 B8 B7 136.93(10) . . . . ? 
N1 B3 B8 B4 109.54(13) . . . . ? 
C2 B3 B8 B4 -97.82(10) . . . . ? 
C1 B3 B8 B4 -38.88(9) . . . . ? 
B7 B3 B8 B4 -136.93(10) . . . . ? 
N1 B3 B8 B12 -150.44(12) . . . . ? 
C2 B3 B8 B12 2.20(12) . . . . ? 
C1 B3 B8 B12 61.13(12) . . . . ? 
B4 B3 B8 B12 100.01(11) . . . . ? 
B7 B3 B8 B12 -36.91(9) . . . . ? 
N1 B3 B8 B9 146.30(12) . . . . ? 
C2 B3 B8 B9 -61.06(12) . . . . ? 
C1 B3 B8 B9 -2.13(13) . . . . ? 
B4 B3 B8 B9 36.75(9) . . . . ? 
B7 B3 B8 B9 -100.17(11) . . . . ? 
C2 B7 B8 B3 -39.87(9) . . . . ? 
B12 B7 B8 B3 -138.53(10) . . . . ? 
B11 B7 B8 B3 -100.96(11) . . . . ? 
C2 B7 B8 B4 -1.13(13) . . . . ? 
B12 B7 B8 B4 -99.79(11) . . . . ? 
B11 B7 B8 B4 -62.22(12) . . . . ? 
B3 B7 B8 B4 38.74(9) . . . . ? 
C2 B7 B8 B12 98.66(10) . . . . ? 
B11 B7 B8 B12 37.57(10) . . . . ? 
B3 B7 B8 B12 138.53(10) . . . . ? 
C2 B7 B8 B9 61.57(12) . . . . ? 
B12 B7 B8 B9 -37.09(10) . . . . ? 
B11 B7 B8 B9 0.48(13) . . . . ? 
B3 B7 B8 B9 101.44(11) . . . . ? 
C1 B4 B8 B3 39.89(9) . . . . ? 
B9 B4 B8 B3 138.66(10) . . . . ? 
B5 B4 B8 B3 101.33(11) . . . . ? 
C1 B4 B8 B7 1.12(13) . . . . ? 
B9 B4 B8 B7 99.89(11) . . . . ? 
B5 B4 B8 B7 62.56(12) . . . . ? 
B3 B4 B8 B7 -38.77(9) . . . . ? 
C1 B4 B8 B12 -61.65(12) . . . . ? 
B9 B4 B8 B12 37.12(10) . . . . ? 
B5 B4 B8 B12 -0.21(13) . . . . ? 
B3 B4 B8 B12 -101.54(11) . . . . ? 
C1 B4 B8 B9 -98.76(10) . . . . ? 
B5 B4 B8 B9 -37.32(10) . . . . ? 
B3 B4 B8 B9 -138.66(10) . . . . ? 
C1 B4 B9 B5 -39.92(9) . . . . ? 
B8 B4 B9 B5 -138.43(11) . . . . ? 
B3 B4 B9 B5 -101.94(11) . . . . ? 
C1 B4 B9 B12 61.03(12) . . . . ? 
B5 B4 B9 B12 100.95(11) . . . . ? 
B8 B4 B9 B12 -37.48(10) . . . . ? 
B3 B4 B9 B12 -0.99(13) . . . . ? 
C1 B4 B9 B10 -2.68(13) . . . . ? 
B5 B4 B9 B10 37.24(10) . . . . ? 
B8 B4 B9 B10 -101.19(11) . . . . ? 
B3 B4 B9 B10 -64.69(12) . . . . ? 
C1 B4 B9 B8 98.51(10) . . . . ? 
B5 B4 B9 B8 138.43(11) . . . . ? 
B3 B4 B9 B8 36.49(9) . . . . ? 
C1 B5 B9 B4 39.39(9) . . . . ? 
B10 B5 B9 B4 138.28(10) . . . . ? 
B6 B5 B9 B4 100.93(11) . . . . ? 
C1 B5 B9 B12 -61.63(12) . . . . ? 
B4 B5 B9 B12 -101.02(11) . . . . ? 
B10 B5 B9 B12 37.27(10) . . . . ? 
B6 B5 B9 B12 -0.09(13) . . . . ? 
C1 B5 B9 B10 -98.90(10) . . . . ? 
B4 B5 B9 B10 -138.28(10) . . . . ? 
B6 B5 B9 B10 -37.36(10) . . . . ? 
C1 B5 B9 B8 2.01(13) . . . . ? 
B4 B5 B9 B8 -37.38(10) . . . . ? 
B10 B5 B9 B8 100.91(11) . . . . ? 
B6 B5 B9 B8 63.55(13) . . . . ? 
B3 B8 B9 B4 -37.24(10) . . . . ? 
B7 B8 B9 B4 -101.22(11) . . . . ? 
B12 B8 B9 B4 -138.18(11) . . . . ? 
B3 B8 B9 B5 0.09(14) . . . . ? 
B7 B8 B9 B5 -63.88(12) . . . . ? 
B4 B8 B9 B5 37.34(10) . . . . ? 
B12 B8 B9 B5 -100.84(11) . . . . ? 
B3 B8 B9 B12 100.94(11) . . . . ? 
B7 B8 B9 B12 36.96(10) . . . . ? 
B4 B8 B9 B12 138.18(11) . . . . ? 
B3 B8 B9 B10 63.52(12) . . . . ? 
B7 B8 B9 B10 -0.45(13) . . . . ? 
B4 B8 B9 B10 100.76(11) . . . . ? 
B12 B8 B9 B10 -37.42(10) . . . . ? 
C1 B6 B10 B5 39.61(9) . . . . ? 
C2 B6 B10 B5 98.54(11) . . . . ? 
B11 B6 B10 B5 137.88(11) . . . . ? 
C1 B6 B10 B11 -98.27(11) . . . . ? 
C2 B6 B10 B11 -39.33(9) . . . . ? 
B5 B6 B10 B11 -137.88(11) . . . . ? 
C1 B6 B10 B9 2.18(13) . . . . ? 
C2 B6 B10 B9 61.12(12) . . . . ? 
B5 B6 B10 B9 -37.43(10) . . . . ? 
B11 B6 B10 B9 100.45(11) . . . . ? 
C1 B6 B10 B12 -61.00(12) . . . . ? 
C2 B6 B10 B12 -2.06(13) . . . . ? 
B5 B6 B10 B12 -100.61(11) . . . . ? 
B11 B6 B10 B12 37.27(10) . . . . ? 
C1 B5 B10 B6 -40.13(10) . . . . ? 
B9 B5 B10 B6 -138.00(10) . . . . ? 
B4 B5 B10 B6 -100.75(11) . . . . ? 
C1 B5 B10 B11 -2.24(14) . . . . ? 
B9 B5 B10 B11 -100.12(11) . . . . ? 
B4 B5 B10 B11 -62.87(13) . . . . ? 
B6 B5 B10 B11 37.88(10) . . . . ? 
C1 B5 B10 B9 97.87(11) . . . . ? 
B4 B5 B10 B9 37.25(10) . . . . ? 
B6 B5 B10 B9 138.00(10) . . . . ? 
C1 B5 B10 B12 60.90(13) . . . . ? 
B9 B5 B10 B12 -36.97(10) . . . . ? 
B4 B5 B10 B12 0.28(14) . . . . ? 
B6 B5 B10 B12 101.03(11) . . . . ? 
B4 B9 B10 B6 0.29(13) . . . . ? 
B5 B9 B10 B6 37.66(10) . . . . ? 
B12 B9 B10 B6 -100.82(11) . . . . ? 
B8 B9 B10 B6 -63.46(13) . . . . ? 
B4 B9 B10 B5 -37.37(10) . . . . ? 
B12 B9 B10 B5 -138.48(10) . . . . ? 
B8 B9 B10 B5 -101.12(11) . . . . ? 
B4 B9 B10 B11 64.01(12) . . . . ? 
B5 B9 B10 B11 101.37(11) . . . . ? 
B12 B9 B10 B11 -37.11(10) . . . . ? 
B8 B9 B10 B11 0.25(13) . . . . ? 
B4 B9 B10 B12 101.11(11) . . . . ? 
B5 B9 B10 B12 138.48(10) . . . . ? 
B8 B9 B10 B12 37.36(10) . . . . ? 
C1 C2 B11 B12 -64.07(12) . . . . ? 
B7 C2 B11 B12 40.30(9) . . . . ? 
B3 C2 B11 B12 3.65(14) . . . . ? 
B6 C2 B11 B12 -102.89(11) . . . . ? 
C1 C2 B11 B7 -104.37(11) . . . . ? 
B3 C2 B11 B7 -36.65(10) . . . . ? 
B6 C2 B11 B7 -143.19(11) . . . . ? 
C1 C2 B11 B10 -1.50(13) . . . . ? 
B7 C2 B11 B10 102.87(11) . . . . ? 
B3 C2 B11 B10 66.23(13) . . . . ? 
B6 C2 B11 B10 -40.31(10) . . . . ? 
C1 C2 B11 B6 38.82(10) . . . . ? 
B7 C2 B11 B6 143.19(11) . . . . ? 
B3 C2 B11 B6 106.54(11) . . . . ? 
B12 B7 B11 C2 133.42(10) . . . . ? 
B8 B7 B11 C2 95.73(11) . . . . ? 
B3 B7 B11 C2 33.16(9) . . . . ? 
C2 B7 B11 B12 -133.42(10) . . . . ? 
B8 B7 B11 B12 -37.69(10) . . . . ? 
B3 B7 B11 B12 -100.27(11) . . . . ? 
C2 B7 B11 B10 -96.06(11) . . . . ? 
B12 B7 B11 B10 37.37(10) . . . . ? 
B8 B7 B11 B10 -0.33(13) . . . . ? 
B3 B7 B11 B10 -62.90(13) . . . . ? 
C2 B7 B11 B6 -32.89(10) . . . . ? 
B12 B7 B11 B6 100.53(11) . . . . ? 
B8 B7 B11 B6 62.83(13) . . . . ? 
B3 B7 B11 B6 0.26(14) . . . . ? 
B6 B10 B11 C2 40.16(10) . . . . ? 
B5 B10 B11 C2 2.30(14) . . . . ? 
B9 B10 B11 C2 -60.88(12) . . . . ? 
B12 B10 B11 C2 -98.01(11) . . . . ? 
B6 B10 B11 B12 138.17(11) . . . . ? 
B5 B10 B11 B12 100.31(11) . . . . ? 
B9 B10 B11 B12 37.13(10) . . . . ? 
B6 B10 B11 B7 101.09(11) . . . . ? 
B5 B10 B11 B7 63.23(13) . . . . ? 
B9 B10 B11 B7 0.05(13) . . . . ? 
B12 B10 B11 B7 -37.09(10) . . . . ? 
B5 B10 B11 B6 -37.86(10) . . . . ? 
B9 B10 B11 B6 -101.04(11) . . . . ? 
B12 B10 B11 B6 -138.17(11) . . . . ? 
C1 B6 B11 C2 -35.11(9) . . . . ? 
B10 B6 B11 C2 -133.43(11) . . . . ? 
B5 B6 B11 C2 -95.77(11) . . . . ? 
C1 B6 B11 B12 60.73(12) . . . . ? 
C2 B6 B11 B12 95.84(11) . . . . ? 
B10 B6 B11 B12 -37.59(10) . . . . ? 
B5 B6 B11 B12 0.07(13) . . . . ? 
C1 B6 B11 B7 -2.59(13) . . . . ? 
C2 B6 B11 B7 32.52(9) . . . . ? 
B10 B6 B11 B7 -100.91(11) . . . . ? 
B5 B6 B11 B7 -63.26(13) . . . . ? 
C1 B6 B11 B10 98.32(11) . . . . ? 
C2 B6 B11 B10 133.43(11) . . . . ? 
B5 B6 B11 B10 37.66(10) . . . . ? 
C2 B7 B12 B11 39.76(9) . . . . ? 
B8 B7 B12 B11 138.09(11) . . . . ? 
B3 B7 B12 B11 101.49(11) . . . . ? 
C2 B7 B12 B9 -60.85(12) . . . . ? 
B11 B7 B12 B9 -100.61(11) . . . . ? 
B8 B7 B12 B9 37.48(10) . . . . ? 
B3 B7 B12 B9 0.88(14) . . . . ? 
C2 B7 B12 B8 -98.33(10) . . . . ? 
B11 B7 B12 B8 -138.09(11) . . . . ? 
B3 B7 B12 B8 -36.60(9) . . . . ? 
C2 B7 B12 B10 2.71(13) . . . . ? 
B11 B7 B12 B10 -37.05(10) . . . . ? 
B8 B7 B12 B10 101.04(11) . . . . ? 
B3 B7 B12 B10 64.44(13) . . . . ? 
C2 B11 B12 B7 -39.55(9) . . . . ? 
B10 B11 B12 B7 -138.54(10) . . . . ? 
B6 B11 B12 B7 -101.33(11) . . . . ? 
C2 B11 B12 B9 61.66(12) . . . . ? 
B7 B11 B12 B9 101.21(11) . . . . ? 
B10 B11 B12 B9 -37.33(9) . . . . ? 
B6 B11 B12 B9 -0.12(13) . . . . ? 
C2 B11 B12 B8 -1.97(13) . . . . ? 
B7 B11 B12 B8 37.58(10) . . . . ? 
B10 B11 B12 B8 -100.96(11) . . . . ? 
B6 B11 B12 B8 -63.75(13) . . . . ? 
C2 B11 B12 B10 98.99(11) . . . . ? 
B7 B11 B12 B10 138.54(10) . . . . ? 
B6 B11 B12 B10 37.21(10) . . . . ? 
B4 B9 B12 B7 0.07(14) . . . . ? 
B5 B9 B12 B7 63.74(13) . . . . ? 
B10 B9 B12 B7 100.85(11) . . . . ? 
B8 B9 B12 B7 -37.48(10) . . . . ? 
B4 B9 B12 B11 -63.54(13) . . . . ? 
B5 B9 B12 B11 0.13(13) . . . . ? 
B10 B9 B12 B11 37.25(9) . . . . ? 
B8 B9 B12 B11 -101.09(11) . . . . ? 
B4 B9 B12 B8 37.55(10) . . . . ? 
B5 B9 B12 B8 101.22(11) . . . . ? 
B10 B9 B12 B8 138.33(10) . . . . ? 
B4 B9 B12 B10 -100.79(11) . . . . ? 
B5 B9 B12 B10 -37.11(10) . . . . ? 
B8 B9 B12 B10 -138.33(10) . . . . ? 
B3 B8 B12 B7 37.40(10) . . . . ? 
B4 B8 B12 B7 101.29(11) . . . . ? 
B9 B8 B12 B7 138.24(11) . . . . ? 
B3 B8 B12 B11 -0.16(13) . . . . ? 
B7 B8 B12 B11 -37.56(10) . . . . ? 
B4 B8 B12 B11 63.73(12) . . . . ? 
B9 B8 B12 B11 100.68(11) . . . . ? 
B3 B8 B12 B9 -100.84(11) . . . . ? 
B7 B8 B12 B9 -138.24(11) . . . . ? 
B4 B8 B12 B9 -36.95(10) . . . . ? 
B3 B8 B12 B10 -63.51(12) . . . . ? 
B7 B8 B12 B10 -100.91(11) . . . . ? 
B4 B8 B12 B10 0.38(13) . . . . ? 
B9 B8 B12 B10 37.33(10) . . . . ? 
B6 B10 B12 B7 -0.38(14) . . . . ? 
B5 B10 B12 B7 -64.10(13) . . . . ? 
B11 B10 B12 B7 37.17(10) . . . . ? 
B9 B10 B12 B7 -101.07(11) . . . . ? 
B6 B10 B12 B11 -37.55(10) . . . . ? 
B5 B10 B12 B11 -101.27(11) . . . . ? 
B9 B10 B12 B11 -138.24(10) . . . . ? 
B6 B10 B12 B9 100.69(11) . . . . ? 
B5 B10 B12 B9 36.98(10) . . . . ? 
B11 B10 B12 B9 138.24(10) . . . . ? 
B6 B10 B12 B8 63.31(13) . . . . ? 
B5 B10 B12 B8 -0.41(14) . . . . ? 
B11 B10 B12 B8 100.86(11) . . . . ? 
B9 B10 B12 B8 -37.38(10) . . . . ? 
C2 B3 N1 C13 21.8(2) . . . . ? 
C1 B3 N1 C13 -48.83(19) . . . . ? 
B8 B3 N1 C13 168.64(12) . . . . ? 
B4 B3 N1 C13 -118.14(14) . . . . ? 
B7 B3 N1 C13 93.91(16) . . . . ? 
C16 N5 N6 N7 -0.58(13) . . . . ? 
C14 N5 N6 N7 -175.72(10) . . . . ? 
N5 N6 N7 N8 0.22(13) . . . . ? 
N6 N7 N8 C16 0.23(14) . . . . ? 
C17 N9 N10 N11 -0.32(13) . . . . ? 
C15 N9 N10 N11 178.12(10) . . . . ? 
N9 N10 N11 N12 0.26(14) . . . . ? 
N10 N11 N12 C17 -0.10(15) . . . . ? 
B3 N1 C13 N2 -1.41(19) . . . . ? 
B3 N1 C13 N4 178.30(11) . . . . ? 
C14 N2 C13 N1 -178.63(11) . . . . ? 
C14 N2 C13 N4 1.68(17) . . . . ? 
C15 N4 C13 N1 -178.54(11) . . . . ? 
C15 N4 C13 N2 1.15(17) . . . . ? 
C13 N2 C14 N3 -3.74(18) . . . . ? 
C13 N2 C14 N5 175.46(10) . . . . ? 
C15 N3 C14 N2 2.43(18) . . . . ? 
C15 N3 C14 N5 -176.78(10) . . . . ? 
C16 N5 C14 N2 176.25(11) . . . . ? 
N6 N5 C14 N2 -9.85(16) . . . . ? 
C16 N5 C14 N3 -4.44(18) . . . . ? 
N6 N5 C14 N3 169.46(10) . . . . ? 
C13 N4 C15 N3 -2.81(18) . . . . ? 
C13 N4 C15 N9 176.97(10) . . . . ? 
C14 N3 C15 N4 1.25(18) . . . . ? 
C14 N3 C15 N9 -178.53(10) . . . . ? 
C17 N9 C15 N4 12.61(19) . . . . ? 
N10 N9 C15 N4 -165.41(11) . . . . ? 
C17 N9 C15 N3 -167.58(12) . . . . ? 
N10 N9 C15 N3 14.40(16) . . . . ? 
N7 N8 C16 N5 -0.59(13) . . . . ? 
N7 N8 C16 C18 -179.90(11) . . . . ? 
N6 N5 C16 N8 0.74(13) . . . . ? 
C14 N5 C16 N8 175.21(12) . . . . ? 
N6 N5 C16 C18 -179.98(12) . . . . ? 
C14 N5 C16 C18 -5.5(2) . . . . ? 
N11 N12 C17 N9 -0.11(14) . . . . ? 
N11 N12 C17 C19 178.08(11) . . . . ? 
N10 N9 C17 N12 0.27(14) . . . . ? 
C15 N9 C17 N12 -177.92(12) . . . . ? 
N10 N9 C17 C19 -177.88(12) . . . . ? 
C15 N9 C17 C19 3.9(2) . . . . ? 
  
loop_
_geom_hbond_atom_site_label_D
_geom_hbond_atom_site_label_H
_geom_hbond_atom_site_label_A
_geom_hbond_distance_DH
_geom_hbond_distance_HA
_geom_hbond_distance_DA
_geom_hbond_angle_DHA
_geom_hbond_site_symmetry_A
_geom_hbond_publ_flag
N1      H1N     O1S      0.929(19)  2.017(19) 2.9363(14)  170.1(16)   3_555 yes

_refine_diff_density_max    0.275 
_refine_diff_density_min   -0.218 
_refine_diff_density_rms    0.047 
  
_shelx_res_file 
; 
  
    a.res created by SHELXL-2014/7 
  
  
TITL a in P2(1)/c 
CELL 0.71073  14.79360  11.96060  13.74590  90.0000 111.6708  90.0000 
ZERR    4.00   0.00050   0.00040   0.00050   0.0000   0.0012   0.0000 
LATT  1 
SYMM -X, 0.5+Y, 0.5-Z 
SFAC C H B N O 
UNIT 48 96 40 48 4 
TEMP -173.000 
SIZE 0.10 0.50 0.50 
  
omit -4 56 
acta 
  
L.S. 8 
BOND $H 
FMAP 2 
PLAN 40 
conf 
  
WGHT    0.048300    0.941400 
FVAR       0.21903 
C1    1   -0.340165    0.329762   -0.007065    11.00000    0.01699    0.01605 = 
         0.01076   -0.00117    0.00306    0.00087 
H1    2   -0.300285    0.356075    0.060415    11.00000    0.01877 
C2    1   -0.300944    0.360430   -0.101328    11.00000    0.01476    0.01408 = 
         0.01565    0.00165    0.00389   -0.00135 
H2    2   -0.239669    0.403859   -0.079127    11.00000    0.02586 
B3    3   -0.289643    0.224724   -0.056643    11.00000    0.01428    0.01214 = 
         0.01178   -0.00121    0.00344   -0.00088 
B4    3   -0.396368    0.204000   -0.026980    11.00000    0.01505    0.01642 = 
         0.01303    0.00065    0.00482   -0.00089 
H4    2   -0.387871    0.153249    0.040834    11.00000    0.02212 
B5    3   -0.464059    0.330604   -0.051218    11.00000    0.01862    0.02002 = 
         0.01495    0.00059    0.00771    0.00297 
H5    2   -0.496714    0.358021    0.003422    11.00000    0.02490 
B6    3   -0.399757    0.432295   -0.095245    11.00000    0.01875    0.01546 = 
         0.01796    0.00124    0.00485    0.00330 
H6    2   -0.388133    0.519323   -0.072223    11.00000    0.02036 
B7    3   -0.327377    0.257891   -0.192741    11.00000    0.01629    0.01847 = 
         0.01273    0.00139    0.00532    0.00212 
H7    2   -0.275046    0.242495   -0.228975    11.00000    0.02315 
B8    3   -0.390750    0.155792   -0.147651    11.00000    0.01453    0.01623 = 
         0.01285   -0.00170    0.00316   -0.00007 
H8    2   -0.383465    0.067039   -0.162786    11.00000    0.02256 
B9    3   -0.498691    0.220624   -0.144634    11.00000    0.01426    0.01828 = 
         0.01488    0.00101    0.00434   -0.00030 
H9    2   -0.566543    0.172408   -0.160057    11.00000    0.02093 
B10   3   -0.500996    0.362311   -0.186740    11.00000    0.01497    0.01962 = 
         0.01443    0.00150    0.00455    0.00188 
H10   2   -0.568134    0.408108   -0.227852    11.00000    0.02181 
B11   3   -0.394936    0.384545   -0.216199    11.00000    0.01595    0.01968 = 
         0.01454    0.00414    0.00475    0.00210 
H11   2   -0.385303    0.447378   -0.268561    11.00000    0.02628 
B12   3   -0.456179    0.253926   -0.246737    11.00000    0.01679    0.02026 = 
         0.01172    0.00031    0.00321    0.00135 
H12   2   -0.494911    0.226131   -0.329682    11.00000    0.02687 
N1    4   -0.197375    0.168624    0.004567    11.00000    0.01483    0.01142 = 
         0.01441   -0.00110    0.00232   -0.00057 
H1N   2   -0.195923    0.091114    0.001039    11.00000    0.03159 
N2    4   -0.104014    0.326796    0.067920    11.00000    0.01496    0.01262 = 
         0.01240    0.00023    0.00425    0.00073 
N3    4    0.061364    0.302209    0.181949    11.00000    0.01474    0.01354 = 
         0.01222    0.00020    0.00426    0.00016 
N4    4   -0.038205    0.142188    0.114057    11.00000    0.01368    0.01427 = 
         0.01215   -0.00006    0.00378    0.00049 
N5    4   -0.000845    0.478541    0.128056    11.00000    0.01453    0.01273 = 
         0.01132    0.00099    0.00425    0.00127 
N6    4   -0.069446    0.548058    0.060813    11.00000    0.01975    0.01377 = 
         0.01419    0.00358    0.00604    0.00365 
N7    4   -0.032024    0.646388    0.076927    11.00000    0.02256    0.01602 = 
         0.01730    0.00128    0.00752    0.00031 
N8    4    0.060072    0.645355    0.152865    11.00000    0.02128    0.01643 = 
         0.01666    0.00124    0.00709   -0.00056 
N9    4    0.120863    0.123261    0.230980    11.00000    0.01351    0.01339 = 
         0.01219    0.00012    0.00293   -0.00032 
N10   4    0.199681    0.168063    0.310203    11.00000    0.01460    0.02038 = 
         0.01271    0.00096    0.00015   -0.00029 
N11   4    0.256194    0.085605    0.351171    11.00000    0.01851    0.02144 = 
         0.01684    0.00278    0.00273    0.00219 
N12   4    0.218320   -0.013716    0.301870    11.00000    0.01848    0.01909 = 
         0.01630    0.00325    0.00538    0.00289 
C13   1   -0.111961    0.213922    0.062867    11.00000    0.01468    0.01415 = 
         0.01003    0.00002    0.00532    0.00105 
C14   1   -0.016321    0.361413    0.125634    11.00000    0.01612    0.01294 = 
         0.01003   -0.00053    0.00680    0.00012 
C15   1    0.042711    0.193083    0.171563    11.00000    0.01399    0.01541 = 
         0.00982    0.00154    0.00504    0.00216 
C16   1    0.078811    0.541109    0.183445    11.00000    0.01798    0.01470 = 
         0.01314   -0.00185    0.00848   -0.00231 
C17   1    0.134786    0.010787    0.227734    11.00000    0.01704    0.01419 = 
         0.01329    0.00323    0.00803    0.00260 
C18   1    0.170821    0.502149    0.264999    11.00000    0.01738    0.01675 = 
         0.01943   -0.00086    0.00333   -0.00265 
AFIX 137 
H18A  2    0.213027    0.566506    0.294620    11.00000   -1.50000 
H18B  2    0.203829    0.450486    0.233708    11.00000   -1.50000 
H18C  2    0.156403    0.463710    0.320557    11.00000   -1.50000 
AFIX   0 
C19   1    0.070033   -0.070552    0.152632    11.00000    0.01981    0.01389 = 
         0.01714   -0.00087    0.00644    0.00158 
AFIX 137 
H19A  2    0.099863   -0.144942    0.166207    11.00000   -1.50000 
H19B  2    0.060347   -0.047672    0.081013    11.00000   -1.50000 
H19C  2    0.007100   -0.072790    0.161047    11.00000   -1.50000 
AFIX   0 
O1S   5    0.197312    0.073000    0.033245    11.00000    0.02186    0.01819 = 
         0.02926   -0.00020    0.01040   -0.00343 
C1S   1    0.258562    0.144296    0.039085    11.00000    0.01651    0.01777 = 
         0.01241    0.00332    0.00188    0.00108 
C2S   1    0.258404    0.255595    0.088951    11.00000    0.01978    0.01796 = 
         0.02057   -0.00064    0.00708   -0.00159 
AFIX 137 
H2SA  2    0.196436    0.266033    0.098370    11.00000   -1.50000 
H2SB  2    0.266738    0.315007    0.043880    11.00000   -1.50000 
H2SC  2    0.311935    0.258570    0.157233    11.00000   -1.50000 
AFIX   0 
C3S   1    0.337136    0.125080   -0.003337    11.00000    0.02072    0.02317 = 
         0.01965   -0.00050    0.00833   -0.00081 
AFIX 137 
H3SA  2    0.332589    0.048477   -0.030033    11.00000   -1.50000 
H3SB  2    0.400800    0.136177    0.052546    11.00000   -1.50000 
H3SC  2    0.329415    0.178016   -0.060272    11.00000   -1.50000 
  
AFIX   0 
HKLF 4 
  
REM  a in P2(1)/c 
REM R1 =  0.0419 for    4609 Fo > 4sig(Fo)  and  0.0510 for all    5447 data 
REM    368 parameters refined using      0 restraints 
  
END 
  
WGHT      0.0472      0.9663 
  
REM Highest difference peak  0.275,  deepest hole -0.218,  1-sigma level  0.047 
Q1    1   0.0810  0.1573  0.2049  11.00000  0.05    0.27 
Q2    1   0.0436  0.5035  0.1569  11.00000  0.05    0.26 
Q3    1  -0.2405  0.2021 -0.0268  11.00000  0.05    0.26 
Q4    1   0.2950  0.1324  0.0193  11.00000  0.05    0.25 
Q5    1   0.2640  0.1979  0.0677  11.00000  0.05    0.25 
Q6    1  -0.0030  0.4250  0.1285  11.00000  0.05    0.24 
Q7    1  -0.3284  0.1785 -0.0945  11.00000  0.05    0.24 
Q8    1   0.0507  0.2497  0.1662  11.00000  0.05    0.24 
Q9    1   0.1191  0.0659  0.2196  11.00000  0.05    0.23 
Q10   1   0.1003 -0.0252  0.1914  11.00000  0.05    0.23 
Q11   1  -0.1091  0.2789  0.0584  11.00000  0.05    0.23 
Q12   1  -0.4537  0.2362 -0.0748  11.00000  0.05    0.23 
Q13   1   0.0734  0.6005  0.1850  11.00000  0.05    0.22 
Q14   1   0.1047  0.3330  0.2117  11.00000  0.05    0.22 
Q15   1  -0.0085  0.1649  0.1585  11.00000  0.05    0.22 
Q16   1   0.0207  0.3296  0.1654  11.00000  0.05    0.22 
Q17   1  -0.0561  0.3405  0.0903  11.00000  0.05    0.21 
Q18   1  -0.0682  0.7014  0.0454  11.00000  0.05    0.21 
Q19   1  -0.4476  0.3339 -0.2157  11.00000  0.05    0.20 
Q20   1  -0.0758  0.1750  0.0961  11.00000  0.05    0.20 
Q21   1  -0.3964  0.2899 -0.2346  11.00000  0.05    0.20 
Q22   1   0.0886  0.6989  0.1889  11.00000  0.05    0.20 
Q23   1  -0.1492  0.3732  0.0381  11.00000  0.05    0.19 
Q24   1   0.0082  0.1705  0.1235  11.00000  0.05    0.19 
Q25   1   0.3221  0.2953  0.1116  11.00000  0.05    0.18 
Q26   1   0.1474  0.1476  0.2631  11.00000  0.05    0.18 
Q27   1   0.1236  0.5185  0.2171  11.00000  0.05    0.18 
Q28   1  -0.4499  0.1929 -0.1790  11.00000  0.05    0.18 
Q29   1  -0.4503  0.3992 -0.1424  11.00000  0.05    0.18 
Q30   1   0.0161  0.6528  0.1227  11.00000  0.05    0.18 
Q31   1  -0.0335  0.5047  0.0955  11.00000  0.05    0.18 
Q32   1  -0.1602  0.1953  0.0307  11.00000  0.05    0.17 
Q33   1  -0.4791  0.2778 -0.1799  11.00000  0.05    0.17 
Q34   1  -0.1211  0.5272  0.0150  11.00000  0.05    0.17 
Q35   1   0.3070  0.1004  0.3901  11.00000  0.05    0.16 
Q36   1  -0.5682  0.4232 -0.3271  11.00000  0.05    0.16 
Q37   1  -0.3961  0.2221 -0.2033  11.00000  0.05    0.16 
Q38   1   0.2534 -0.0635  0.3277  11.00000  0.05    0.16 
Q39   1   0.2202  0.2348  0.3274  11.00000  0.05    0.16 
Q40   1  -0.4848  0.3112 -0.1200  11.00000  0.05    0.15 
; 
_shelx_res_checksum   30553 
  
_shelx_hkl_file 
; 
   0   0   2    4.66    0.19 
   0   0   2    4.51    0.29 
   0   0  -2    4.53    0.19 
   0   0  -2    4.31    0.29 
   0   0  -3    0.06    0.12 
   0   0   3   -0.20    0.14 
   0   0   3    0.06    0.11 
   0   0  -3    0.03    0.18 
   0   0   4    0.18    0.11 
   0   0  -4   -0.11    0.16 
   0   0   4    0.03    0.19 
   0   0  -4    0.05    0.11 
   0   0   5   -0.11    0.21 
   0   0  -5    0.11    0.16 
   0   0   5   -0.02    0.14 
   0   0  -5   -0.38    0.21 
   0   0  -6   53.04    1.31 
   0   0  -6   53.51    1.78 
   0   0   6   52.15    1.68 
   0   0   6   54.04    1.31 
   0   0   7    0.10    0.28 
   0   0   7   -0.11    0.17 
   0   0  -7   -0.14    0.19 
   0   0  -7    0.03    0.33 
   0   0  -8   28.05    1.99 
   0   0   8   31.53    0.96 
   0   0  -8   29.97    0.93 
   0   0   8   29.36    1.31 
   0   0  -9   -0.13    0.32 
   0   0   9   -0.03    0.19 
   0   0  -9   -0.10    0.19 
   0   0   9    0.12    0.31 
   0   0 -10    8.31    0.93 
   0   0 -10    7.62    0.51 
   0   0  10    7.20    0.51 
   0   0  11    0.29    0.25 
   0   0 -11    0.54    0.49 
   0   0  12    6.17    0.51 
   0   0 -12    9.92    1.44 
   0   0  12    5.74    0.54 
   0   0 -13   -0.23    0.47 
   0   0  13    0.95    0.31 
   0   0  13    0.64    0.34 
   0   0  14    3.52    0.54 
   0   0 -14    4.20    1.13 
   0   0  15    0.87    0.37 
   0   0 -15    0.32    0.57 
   0   0  15   -0.26    0.33 
   0   0  16   26.56    1.12 
   0   0  17    0.18    0.79 
   0   0  17    1.27    0.44 
   0   0  18    0.21    0.97 
   0   1   0   -0.27    0.03 
   0   1   1   66.25    1.31 
   0   1  -1   65.47    1.36 
   0  -1   1   57.94    1.25 
   0   1   2   75.22    1.53 
   0   1   2   71.90    1.59 
   0   1  -2   76.66    1.48 
   0   1   2   73.98    1.52 
   0   1  -2   73.49    1.69 
   0  -1  -2   72.08    1.70 
   0  -1   2   72.68    1.67 
   0  -1   2   71.75    1.46 
   0   1  -3  443.80    8.75 
   0   1   3  450.00    8.64 
   0   1  -3  461.62    8.41 
   0   1   3  450.23    8.46 
   0  -1   3  448.54    8.40 
   0  -1   3  454.29    8.74 
   0  -1  -3  448.11    8.66 
   0   1   4  141.14    2.85 
   0   1  -4  141.70    2.79 
   0   1  -4  142.36    3.23 
   0   1   4  141.40    3.09 
   0  -1   4  143.33    3.22 
   0  -1  -4  139.60    3.13 
   0  -1   4  137.49    2.78 
   0  -1  -4  139.11    2.85 
   0   1  -5   95.63    2.01 
   0   1   5   92.86    2.06 
   0   1  -5   95.57    2.50 
   0   1   5   94.26    2.35 
   0  -1  -5   94.43    2.06 
   0  -1  -5   97.17    2.44 
   0  -1   5   96.42    2.44 
   0  -1   5   93.83    2.00 
   0   1   6    0.54    0.31 
   0   1  -6    0.05    0.20 
   0   1  -6   -0.20    0.35 
   0  -1  -6    0.00    0.34 
   0  -1   6    0.21    0.17 
   0  -1  -6    0.22    0.23 
   0  -1   6    0.54    0.35 
   0   1   7   37.44    1.10 
   0   1   7   40.47    1.45 
   0   1  -7   38.00    1.57 
   0   1  -7   37.71    1.04 
   0  -1  -7   39.42    1.55 
   0  -1   7   39.23    1.49 
   0   1  -8   17.62    1.11 
   0   1   8   17.50    0.71 
   0   1   8   16.92    0.95 
   0   1  -8   16.72    0.65 
   0  -1  -8   16.16    1.06 
   0  -1   8   18.08    1.21 
   0  -1   8   17.11    0.65 
   0   1  -9   23.78    0.84 
   0   1   9   25.53    1.24 
   0   1   9   24.74    0.90 
   0   1  -9   25.82    1.43 
   0  -1  -9   22.92    1.32 
   0  -1   9   24.60    0.84 
   0  -1   9   25.86    1.30 
   0   1 -10    1.74    0.33 
   0   1  10    1.53    0.35 
   0   1 -10    1.40    0.57 
   0   1  10    0.86    0.35 
   0   1  10    0.56    0.40 
   0  -1  10    1.72    0.36 
   0  -1 -10    1.32    0.51 
   0   1 -11   34.56    1.87 
   0   1  11   37.74    1.24 
   0   1 -11   34.90    1.13 
   0   1  11   35.87    1.25 
   0  -1 -11   36.90    1.87 
   0  -1  11   35.50    1.15 
   0   1  12    1.72    0.42 
   0   1  12    2.05    0.43 
   0   1 -12    0.99    0.58 
   0   1 -12    2.84    0.43 
   0  -1 -12    0.39    0.54 
   0  -1  12    2.02    0.38 
   0   1  13   19.21    0.94 
   0   1 -13   21.10    1.94 
   0  -1 -13   19.23    1.53 
   0  -1  13   18.86    0.84 
   0   1  14    1.18    0.44 
   0   1  14    1.05    0.37 
   0   1 -14    0.92    0.67 
   0  -1  14    0.99    0.36 
   0  -1  14    0.81    0.45 
   0  -1 -14    0.33    0.60 
   0   1 -15   42.49    2.47 
   0   1  15   41.71    1.49 
   0   1  15   43.33    1.52 
   0  -1  15   43.20    1.46 
   0   1  16   17.40    0.96 
   0  -1  16   17.73    0.90 
   0   1  17    1.29    0.91 
   0   1  17    2.13    0.52 
   0   1  18   16.12    2.21 
   0  -1  18   16.46    1.97 
   0   2   0  207.90    3.96 
   0  -2   0  202.97    3.96 
   0   2   1  672.22   12.35 
   0  -2  -1  657.25   12.34 
   0  -2   1  660.35   12.29 
   0   2   2  245.34    4.67 
   0   2   2  234.81    4.59 
   0   2  -2  243.33    4.59 
   0   2  -2  232.46    4.80 
   0  -2   2  242.51    4.58 
   0  -2   2  232.78    4.77 
   0  -2  -2  248.03    4.67 
   0  -2  -2  246.56    4.63 
   0   2  -3   31.96    0.79 
   0   2   3   31.42    0.88 
   0   2   3   31.91    0.87 
   0   2  -3   31.94    1.04 
   0  -2  -3   32.16    0.92 
   0  -2   3   30.40    0.77 
   0  -2   3   32.82    1.03 
   0   2   4    3.00    0.28 
   0   2   4    3.03    0.28 
   0   2  -4    3.78    0.51 
   0   2  -4    3.70    0.25 
   0   2   4    3.16    0.32 
   0  -2   4    3.22    0.38 
   0  -2   4    2.97    0.22 
   0  -2  -4    2.96    0.35 
   0   2   5  163.09    3.35 
   0   2  -5  161.17    3.20 
   0   2   5  156.00    3.32 
   0   2   5  158.19    3.50 
   0   2  -5  156.80    3.75 
   0  -2   5  155.63    3.17 
   0  -2   5  160.16    3.68 
   0  -2  -5  158.59    3.60 
   0   2  -6   10.32    0.81 
   0   2  -6   11.08    0.49 
   0   2   6   10.82    0.57 
   0   2   6   10.31    0.67 
   0   2   6   10.69    0.57 
   0  -2  -6   11.07    0.77 
   0  -2   6    9.86    0.74 
   0  -2   6   10.02    0.46 
   0   2   7   11.07    0.59 
   0   2  -7   10.58    0.49 
   0   2   7   10.83    0.72 
   0   2   7   10.70    0.57 
   0   2  -7   10.80    0.87 
   0  -2  -7    9.66    0.78 
   0  -2   7   10.82    0.79 
   0   2  -8   29.02    0.91 
   0   2  -8   32.11    1.52 
   0   2   8   30.04    1.26 
   0   2   8   29.58    1.03 
   0   2   8   30.57    1.03 
   0  -2  -8   28.38    1.36 
   0  -2   8   29.56    0.90 
   0  -2   8   30.64    1.40 
   0   2   9    5.99    0.49 
   0   2   9    7.23    0.93 
   0   2  -9    8.06    1.09 
   0   2   9    5.69    0.51 
   0   2  -9    5.65    0.44 
   0  -2   9    5.90    0.70 
   0  -2  -9    7.28    0.92 
   0  -2   9    6.06    0.42 
   0   2 -10    0.05    0.44 
   0   2  10   -0.45    0.35 
   0   2  10    0.22    0.30 
   0   2 -10    0.23    0.25 
   0   2  10    0.23    0.29 
   0  -2  10   -0.15    0.22 
   0  -2 -10    0.50    0.49 
   0   2 -11    4.58    0.94 
   0   2 -11    5.03    0.47 
   0   2  11    5.15    0.56 
   0   2  11    6.46    0.57 
   0  -2 -11    6.16    0.98 
   0  -2  11    4.20    0.45 
   0   2  12   19.42    0.95 
   0   2 -12   18.30    1.47 
   0   2 -12   17.36    0.78 
   0  -2  12   19.26    0.80 
   0  -2 -12   19.30    1.45 
   0   2  13   10.03    0.74 
   0   2 -13   12.19    1.60 
   0   2  13   10.31    0.75 
   0   2 -13   10.91    0.64 
   0  -2  13    9.13    0.61 
   0  -2 -13   12.13    1.27 
   0   2  14    1.71    0.49 
   0   2 -14    0.31    0.68 
   0   2  14    1.48    0.46 
   0  -2  14    0.99    0.33 
   0  -2 -14    0.16    0.55 
   0   2  15    0.71    0.42 
   0   2 -15    1.25    0.69 
   0  -2  15    1.79    0.41 
   0   2  16    9.69    0.81 
   0   2  16    9.31    1.41 
   0   2  17    8.07    1.53 
   0   2  17    8.53    0.81 
   0   2  18    1.43    1.06 
   0  -2  18    0.67    1.18 
   0   3   0   -0.39    0.13 
   0  -3   0   -0.46    0.13 
   0   3  -1    7.66    0.37 
   0   3  -1    8.25    0.36 
   0   3   1    7.75    0.38 
   0  -3  -1    7.92    0.39 
   0  -3   1    7.72    0.35 
   0  -3   1    8.38    0.37 
   0   3  -2  293.79    5.47 
   0   3  -2  275.38    5.63 
   0   3   2  284.07    5.55 
   0  -3  -2  283.98    5.54 
   0  -3   2  280.14    5.44 
   0   3   3   59.81    1.38 
   0   3  -3   59.77    1.66 
   0   3  -3   62.04    1.40 
   0   3   3   61.20    1.50 
   0  -3   3   62.09    1.65 
   0  -3  -3   62.46    1.62 
   0  -3  -3   60.78    1.44 
   0  -3   3   62.02    1.39 
   0   3   4   13.40    0.57 
   0   3  -4   14.67    0.52 
   0   3  -4   13.77    0.77 
   0   3   4   14.35    0.61 
   0  -3   4   13.99    0.50 
   0  -3   4   13.89    0.73 
   0  -3  -4   13.77    0.63 
   0   3   5    0.83    0.31 
   0   3  -5    0.47    0.39 
   0   3   5    0.43    0.27 
   0   3  -5    1.27    0.26 
   0  -3   5    0.52    0.21 
   0  -3   5    0.21    0.30 
   0  -3  -5    0.82    0.33 
   0   3  -6   28.13    0.84 
   0   3  -6   25.51    1.26 
   0   3   6   28.02    1.04 
   0   3   6   27.07    0.96 
   0   3   6   27.55    0.97 
   0  -3  -6   26.55    1.12 
   0  -3   6   29.15    1.23 
   0  -3   6   25.79    0.90 
   0   3  -7   83.50    1.89 
   0   3   7   81.12    2.05 
   0   3   7   78.90    2.18 
   0   3   7   78.01    2.02 
   0  -3   7   81.33    2.41 
   0  -3   7   79.57    1.84 
   0  -3  -7   80.99    2.35 
   0   3   8    0.72    0.33 
   0   3  -8    1.17    0.50 
   0   3   8    0.93    0.32 
   0   3  -8    1.18    0.27 
   0   3   8    0.98    0.31 
   0  -3  -8    1.12    0.43 
   0  -3   8    0.36    0.32 
   0  -3   8    1.32    0.27 
   0   3  -9    0.82    0.49 
   0   3   9    0.29    0.39 
   0   3  -9    1.27    0.32 
   0   3   9    0.51    0.30 
   0   3   9    0.85    0.34 
   0  -3   9    0.90    0.27 
   0  -3  -9    1.48    0.47 
   0   3  10  149.30    3.81 
   0   3  10  145.44    3.47 
   0   3 -10  146.87    3.24 
   0   3 -10  153.59    4.40 
   0  -3 -10  156.28    4.18 
   0  -3  10  149.04    3.24 
   0   3  11    4.27    0.58 
   0   3 -11    3.89    0.44 
   0   3  11    5.22    0.65 
   0   3 -11    4.85    0.92 
   0  -3 -11    4.65    0.82 
   0  -3  11    3.83    0.42 
   0   3  12    1.97    0.49 
   0   3 -12    1.37    0.37 
   0   3 -12    1.55    0.72 
   0   3  12    1.54    0.43 
   0  -3 -12    1.58    0.67 
   0  -3  12    2.09    0.40 
   0   3 -13    6.01    0.52 
   0   3  13    5.97    0.68 
   0   3 -13    7.70    1.42 
   0  -3 -13    6.44    1.17 
   0  -3  13    5.90    0.51 
   0   3  14   11.30    0.84 
   0   3 -14   10.90    0.67 
   0   3 -14   12.15    1.54 
   0  -3  14   10.92    0.65 
   0   3  15    0.63    0.47 
   0   3 -15    1.26    0.76 
   0  -3  15    1.59    0.49 
   0   3  16    0.88    0.79 
   0   3  16    1.95    0.57 
   0   3  17    0.58    0.50 
   0   3  17   -1.11    0.72 
   0   3  18    2.14    1.06 
   0   4   0  191.44    3.90 
   0   4  -1    4.07    0.31 
   0   4   1    4.15    0.33 
   0   4  -1    4.29    0.31 
   0  -4  -1    4.33    0.34 
   0  -4   1    3.89    0.27 
   0   4  -2  238.85    4.62 
   0   4   2  230.62    4.70 
   0   4  -2  231.61    4.76 
   0  -4   2  227.14    4.67 
   0  -4  -2  230.74    4.69 
   0   4  -3   16.85    0.81 
   0   4   3   16.10    0.70 
   0   4  -3   17.22    0.62 
   0  -4  -3   17.56    0.70 
   0   4   4   18.01    0.77 
   0   4  -4   17.42    0.92 
   0   4  -4   19.12    0.68 
   0   4   4   17.27    0.62 
   0  -4   4   17.13    0.73 
   0  -4   4   17.82    0.86 
   0  -4  -4   17.89    0.75 
   0  -4  -4   16.88    0.70 
   0   4   5   37.85    1.12 
   0   4  -5   40.54    1.10 
   0   4   5   37.56    1.21 
   0   4  -5   39.28    1.50 
   0  -4   5   39.73    1.07 
   0  -4   5   38.73    1.40 
   0  -4  -5   37.14    1.22 
   0   4   6   43.90    1.36 
   0   4   6   44.16    1.31 
   0   4   6   43.17    1.34 
   0   4  -6   40.80    1.65 
   0   4  -6   44.31    1.20 
   0  -4   6   44.63    1.17 
   0  -4  -6   43.29    1.44 
   0  -4   6   42.34    1.55 
   0   4   7    1.44    0.33 
   0   4  -7    1.82    0.49 
   0   4   7    1.87    0.40 
   0   4   7    1.52    0.37 
   0   4  -7    2.30    0.34 
   0  -4  -7    1.82    0.43 
   0  -4   7    1.80    0.29 
   0  -4   7    1.64    0.48 
   0   4  -8   35.52    1.69 
   0   4  -8   34.92    1.08 
   0   4   8   34.54    1.24 
   0   4   8   36.45    1.31 
   0   4   8   34.04    1.25 
   0  -4   8   34.78    1.04 
   0  -4  -8   33.54    1.44 
   0  -4   8   37.68    1.57 
   0   4   9    1.27    0.37 
   0   4  -9    2.35    0.69 
   0   4   9    1.00    0.38 
   0   4  -9    1.47    0.33 
   0   4   9    1.08    0.39 
   0  -4   9    1.89    0.35 
   0   4  10    5.51    0.67 
   0   4  10    5.12    0.62 
   0   4 -10    4.37    0.50 
   0   4  10    4.46    0.62 
   0   4 -10    5.10    0.96 
   0  -4 -10    4.41    0.77 
   0  -4  10    4.04    0.43 
   0   4  11    2.75    0.55 
   0   4  11    2.25    0.49 
   0   4 -11    2.49    0.77 
   0   4 -11    2.89    0.44 
   0  -4  11    3.11    0.45 
   0  -4 -11    2.57    0.68 
   0   4  12   -0.11    0.35 
   0   4 -12    0.21    0.54 
   0   4 -12    0.08    0.28 
   0  -4  12    0.27    0.28 
   0   4  13    1.41    0.48 
   0   4 -13    0.57    0.69 
   0   4 -13    0.79    0.36 
   0  -4  13    1.57    0.35 
   0   4 -14    5.65    1.19 
   0   4 -14    4.63    0.49 
   0   4  14    5.18    0.74 
   0  -4  14    5.16    0.51 
   0   4 -15    3.28    0.60 
   0   4  15    2.10    0.84 
   0   4  15    2.16    0.56 
   0   4 -15    1.34    0.76 
   0   4  16    8.03    1.34 
   0   4  16    6.82    0.79 
   0   4  17    0.99    0.89 
   0   4  17    0.96    0.61 
   0  -4  17   -0.94    0.66 
   0   4  18    7.53    1.50 
   0   4  18    8.01    1.61 
   0   5   0   -0.17    0.20 
   0  -5   0   -0.21    0.22 
   0   5   1    7.04    0.49 
   0   5  -1    6.13    0.42 
   0   5  -1    6.80    0.45 
   0  -5   1    6.61    0.45 
   0  -5   1    6.19    0.36 
   0  -5  -1    6.55    0.48 
   0   5  -2    0.44    0.24 
   0   5  -2    0.06    0.24 
   0   5   2    0.36    0.26 
   0  -5  -2    0.59    0.31 
   0  -5   2    0.00    0.21 
   0  -5   2    0.16    0.22 
   0   5  -3    0.29    0.23 
   0   5  -3    0.67    0.33 
   0   5   3    0.00    0.26 
   0  -5   3    0.51    0.24 
   0  -5   3    0.01    0.23 
   0  -5  -3    0.27    0.26 
   0   5  -4    7.81    0.48 
   0   5   4    7.23    0.54 
   0   5  -4    7.37    0.65 
   0  -5  -4    7.23    0.53 
   0  -5   4    5.26    0.51 
   0  -5   4    7.27    0.45 
   0   5   5   24.39    0.99 
   0   5  -5   25.26    0.87 
   0   5   5   25.03    0.79 
   0   5  -5   26.41    1.22 
   0  -5   5   25.01    0.84 
   0  -5   5   24.14    1.08 
   0  -5  -5   26.21    0.99 
   0   5   6   -0.02    0.26 
   0   5  -6    0.14    0.33 
   0   5  -6    0.38    0.22 
   0   5   6   -0.11    0.18 
   0   5   6   -0.16    0.23 
   0  -5   6    0.05    0.19 
   0  -5   6   -0.20    0.24 
   0  -5  -6   -0.11    0.22 
   0   5  -7    0.39    0.38 
   0   5   7    0.10    0.28 
   0   5   7    0.27    0.21 
   0   5  -7    0.36    0.24 
   0  -5   7    0.07    0.35 
   0  -5  -7    0.08    0.27 
   0  -5   7    0.49    0.23 
   0   5  -8    3.40    0.43 
   0   5  -8    3.55    0.79 
   0   5   8    3.76    0.50 
   0   5   8    3.48    0.63 
   0   5   8    2.85    0.49 
   0  -5   8    3.67    0.43 
   0  -5  -8    3.09    0.56 
   0  -5   8    3.13    0.56 
   0   5  -9   -0.24    0.21 
   0   5   9    0.26    0.34 
   0   5   9   -0.12    0.26 
   0   5  -9    0.08    0.40 
   0   5   9   -0.02    0.29 
   0  -5  -9    0.36    0.38 
   0  -5   9    0.31    0.25 
   0   5  10    1.50    0.47 
   0   5 -10    1.31    0.64 
   0   5  10    1.60    0.43 
   0   5  10    1.76    0.48 
   0   5 -10    2.30    0.40 
   0  -5  10    1.39    0.35 
   0   5 -11   16.68    1.42 
   0   5  11   16.53    0.98 
   0   5 -11   15.02    0.75 
   0  -5  11   15.37    0.73 
   0   5  12    2.77    0.58 
   0   5 -12    3.20    1.37 
   0   5 -12    3.34    0.49 
   0  -5  12    3.14    0.45 
   0   5 -13   20.38    1.72 
   0   5 -13   22.50    0.92 
   0   5  13   22.05    1.55 
   0   5  13   22.28    1.19 
   0  -5  13   21.82    0.90 
   0   5 -14    8.72    1.44 
   0   5 -14    6.55    0.73 
   0   5  14    8.64    1.26 
   0   5  14    6.61    0.85 
   0  -5  14    7.63    0.59 
   0   5  15    8.97    1.32 
   0   5  15    7.87    0.84 
   0   5  16   10.55    1.54 
   0   5  17    0.57    0.86 
   0   5  17    1.28    0.63 
   0  -5  17    1.09    0.90 
   0   5  18    4.11    0.99 
   0   5  18    6.68    1.48 
   0   6   0  330.12    6.60 
   0  -6   0  326.06    6.61 
   0   6  -1  156.68    3.37 
   0   6   1  153.27    3.41 
   0  -6   1  147.87    3.35 
   0  -6   1  149.71    3.09 
   0  -6  -1  154.88    3.42 
   0   6  -2    2.79    0.41 
   0   6   2    3.00    0.45 
   0   6  -2    1.81    0.36 
   0  -6   2    2.13    0.35 
   0  -6   2    1.79    0.30 
   0  -6  -2    2.42    0.40 
   0   6   3    5.16    0.49 
   0   6  -3    5.88    0.46 
   0   6  -3    5.40    0.55 
   0  -6   3    5.45    0.45 
   0  -6   3    6.02    0.48 
   0  -6  -3    4.67    0.47 
   0   6  -4    7.14    0.49 
   0   6   4    6.70    0.56 
   0   6  -4    7.46    0.66 
   0  -6  -4    7.10    0.54 
   0  -6   4    7.13    0.49 
   0  -6   4    5.12    0.47 
   0   6  -5    3.57    0.40 
   0   6   5    4.72    0.89 
   0   6  -5    3.78    0.61 
   0  -6   5    3.47    0.50 
   0  -6  -5    4.58    0.57 
   0  -6   5    3.86    0.39 
   0   6   6   13.43    0.78 
   0   6   6   13.08    0.64 
   0   6   6   12.27    0.67 
   0   6  -6   13.88    0.67 
   0  -6   6   13.14    0.64 
   0  -6   6   11.62    0.80 
   0   6   7    2.16    0.33 
   0   6  -7    3.33    0.47 
   0   6   7    2.91    0.55 
   0   6   7    2.46    0.51 
   0   6  -7    1.83    0.55 
   0   6   7    1.98    0.41 
   0  -6   7    2.45    0.37 
   0  -6   7    2.08    0.52 
   0   6  -8   -0.28    0.24 
   0   6   8    0.12    0.32 
   0   6   8    0.12    0.23 
   0   6   8   -0.71    0.26 
   0   6  -8   -0.01    0.38 
   0  -6   8   -0.15    0.23 
   0   6   9    2.48    0.44 
   0   6  -9    1.82    0.66 
   0   6  -9    2.23    0.43 
   0   6   9    3.12    0.56 
   0  -6   9    3.14    0.45 
   0   6 -10   14.25    0.75 
   0   6  10   13.06    1.01 
   0   6  10   12.67    0.90 
   0   6 -10   13.11    1.25 
   0  -6  10   13.47    0.71 
   0   6  11    7.51    0.98 
   0   6 -11    7.94    0.61 
   0   6 -11    8.97    1.36 
   0   6  11    7.91    0.70 
   0   6  11    7.93    0.76 
   0  -6  11    7.87    0.59 
   0   6  12    0.87    0.55 
   0   6 -12    1.23    0.49 
   0   6 -12    0.67    0.61 
   0   6  12    0.56    0.41 
   0  -6  12    0.76    0.31 
   0   6  13    0.54    0.57 
   0   6  13   -0.45    0.40 
   0   6 -13   -0.47    0.57 
   0  -6  13    0.52    0.34 
   0   6  14    1.58    0.76 
   0   6 -14    0.44    0.60 
   0   6 -14    1.37    0.45 
   0   6  14    1.24    0.55 
   0   6 -15    5.39    0.77 
   0   6  15    3.84    0.81 
   0   6  15    6.87    1.21 
   0   6  16   19.49    1.22 
   0   6  16   18.53    1.64 
   0   6  17    3.24    0.72 
   0   6  17    3.24    1.02 
   0   6  18    7.01    1.83 
   0   6  18    8.01    1.14 
   0   7   0    0.04    0.25 
   0  -7   0    0.00    0.24 
   0   7  -1   88.03    2.22 
   0   7   1   88.32    2.31 
   0  -7  -1   85.56    2.25 
   0  -7   1   87.63    1.89 
   0  -7   1   84.74    2.22 
   0  -7   1   85.27    2.01 
   0   7   2    4.28    0.73 
   0   7  -2    3.82    0.43 
   0   7  -2    4.26    0.46 
   0  -7  -2    4.33    0.47 
   0  -7   2    3.41    0.39 
   0  -7   2    3.83    0.43 
   0   7  -3    5.38    0.48 
   0   7   3    5.00    0.52 
   0   7  -3    5.46    0.56 
   0  -7   3    5.04    0.45 
   0  -7   3    5.18    0.47 
   0   7  -4   23.94    0.94 
   0   7   4   24.33    1.06 
   0   7  -4   26.35    1.19 
   0  -7   4   24.51    1.01 
   0  -7   4   24.74    0.96 
   0  -7  -4   23.96    1.04 
   0   7  -5    3.76    0.52 
   0   7   5    2.79    0.48 
   0   7  -5    2.01    0.49 
   0  -7  -5    3.48    0.51 
   0  -7   5    3.36    0.44 
   0   7   6    0.10    0.31 
   0   7  -6    0.17    0.37 
   0   7  -6    0.59    0.32 
   0  -7   6    0.51    0.27 
   0  -7   6    0.38    0.37 
   0   7   7    0.16    0.33 
   0   7   7    0.42    0.30 
   0   7  -7    0.07    0.40 
   0   7   7    0.02    0.20 
   0   7  -7    0.80    0.32 
   0  -7   7    0.03    0.27 
   0  -7   7    0.73    0.36 
   0   7  -8    0.90    0.35 
   0   7   8    0.30    0.33 
   0   7   8    0.47    0.25 
   0   7   8    0.76    0.42 
   0   7  -8    0.00    0.44 
   0  -7   8    0.50    0.31 
   0   7  -9   47.64    2.18 
   0   7   9   41.99    1.64 
   0   7   9   43.44    1.63 
   0   7   9   43.43    1.38 
   0   7  -9   41.25    1.70 
   0  -7   9   43.10    1.38 
   0   7 -10    0.47    0.39 
   0   7  10    0.40    0.39 
   0   7  10    1.41    0.34 
   0   7 -10    0.46    0.62 
   0   7  10    1.01    0.53 
   0  -7  10    1.40    0.36 
   0   7  11    1.55    0.36 
   0   7  11   -0.14    0.36 
   0   7 -11    0.15    0.30 
   0   7 -11    0.04    0.58 
   0   7  11   -0.67    0.39 
   0  -7  11    0.12    0.49 
   0   7  12    1.44    0.59 
   0   7 -12    1.87    0.43 
   0   7 -12   -0.27    0.57 
   0   7  12    2.26    0.57 
   0  -7  12    1.54    0.62 
   0   7  13    4.49    0.73 
   0   7 -13    6.22    0.68 
   0   7  13    5.65    0.97 
   0   7 -13    6.85    1.37 
   0  -7  13    5.00    0.59 
   0   7  14    1.65    0.58 
   0   7  14    0.57    0.64 
   0   7 -14    1.34    0.43 
   0   7  15   13.72    1.11 
   0   7 -15   13.96    0.90 
   0   7  15   15.10    1.42 
   0   7  16    2.02    0.82 
   0   7  16    0.50    0.51 
   0  -7  16    0.93    0.92 
   0   7  17    5.89    1.25 
   0   7  17    5.05    0.89 
   0   7  18    1.99    0.82 
   0   8   0   13.55    0.77 
   0  -8   0   12.91    0.77 
   0   8   1   11.69    0.74 
   0   8  -1   12.68    0.74 
   0  -8   1   10.46    0.82 
   0  -8  -1   12.26    0.75 
   0   8  -2  118.15    2.86 
   0   8   2  115.08    2.93 
   0  -8  -2  113.74    2.91 
   0  -8   2  115.22    2.82 
   0   8  -3    6.28    0.56 
   0   8   3    6.26    0.60 
   0  -8   3    6.01    0.48 
   0  -8  -3    6.09    0.58 
   0  -8   3    7.38    1.02 
   0   8  -4    1.93    0.47 
   0   8   4    2.47    0.52 
   0   8  -4    3.13    0.53 
   0  -8   4    3.29    0.46 
   0  -8   4    3.37    0.55 
   0  -8  -4    2.28    0.44 
   0   8   5    7.60    0.70 
   0   8  -5    8.22    0.80 
   0   8  -5    8.97    0.64 
   0  -8   5    8.44    0.66 
   0   8  -6   74.73    2.09 
   0   8  -6   76.17    2.56 
   0   8   6   77.41    2.31 
   0   8   7   17.43    1.04 
   0   8  -7   20.07    1.31 
   0   8  -7   17.72    0.91 
   0  -8   7   17.01    1.01 
   0  -8   7   20.57    1.12 
   0   8   8   59.53    2.02 
   0   8   8   58.25    1.49 
   0   8  -8   59.75    2.41 
   0   8  -8   56.06    1.75 
   0  -8   8   57.34    1.77 
   0   8  -9    2.05    0.75 
   0   8   9    2.79    0.38 
   0   8  -9    2.38    0.50 
   0   8   9    2.70    0.65 
   0   8   9    3.04    0.53 
   0  -8   9    2.91    0.49 
   0   8  10    7.20    0.73 
   0   8 -10    6.98    0.64 
   0   8  10    7.07    0.54 
   0   8  10    6.85    0.79 
   0   8 -10    7.27    1.15 
   0  -8  10    6.62    0.60 
   0   8  11    0.39    0.41 
   0   8 -11   -0.94    0.41 
   0   8  11    0.77    0.33 
   0   8  11   -0.05    0.39 
   0   8 -11   -0.40    0.32 
   0  -8  11    1.71    0.40 
   0   8 -12    9.48    1.43 
   0   8  12   11.09    1.80 
   0   8 -12    8.75    0.69 
   0   8  12    8.18    0.88 
   0  -8  12    9.73    0.71 
   0   8  13   11.94    1.08 
   0   8 -13   13.67    0.83 
   0   8  13   13.21    1.06 
   0   8  14    1.11    0.58 
   0   8  14   -0.30    0.54 
   0   8 -14    1.04    0.47 
   0   8 -15    1.74    0.64 
   0   8  15    2.84    0.70 
   0  -8  15    2.24    0.99 
   0   8  16    0.04    0.58 
   0   8  16    2.04    0.88 
   0  -8  16    1.17    1.02 
   0   8  17    1.15    0.90 
   0   8  17    0.96    0.66 
   0   9   0   -0.17    0.25 
   0  -9   0    0.09    0.36 
   0   9   1   34.11    1.36 
   0   9  -1   35.75    1.35 
   0  -9   1   35.23    1.35 
   0   9   2   -0.04    0.29 
   0   9  -2    0.46    0.33 
   0  -9   2   -0.26    0.27 
   0  -9   2    0.12    0.19 
   0  -9   2   -0.02    0.23 
   0   9  -3    8.95    0.69 
   0   9   3   10.26    0.78 
   0  -9   3   10.29    0.73 
   0  -9   3    9.22    0.69 
   0  -9   3    9.51    0.58 
   0   9  -4    5.41    0.59 
   0   9   4    5.53    0.72 
   0  -9   4    5.52    0.63 
   0  -9   4    5.92    0.56 
   0   9  -5    0.89    0.36 
   0   9   5    0.84    0.40 
   0  -9   5    1.79    0.41 
   0  -9   5    0.58    0.35 
   0   9  -6   43.25    1.51 
   0   9   6   43.93    1.71 
   0   9  -6   40.49    1.81 
   0  -9   6   42.22    1.59 
   0  -9   6   43.31    1.50 
   0   9  -7   45.25    1.57 
   0   9   7   45.79    1.78 
   0   9  -7   45.63    2.03 
   0  -9   7   46.88    1.58 
   0   9  -8    3.38    0.85 
   0   9   8    3.44    0.69 
   0   9  -8    3.76    0.62 
   0  -9   8    3.87    0.58 
   0   9  -9    6.39    0.66 
   0   9   9    5.99    0.84 
   0   9  -9    7.58    1.14 
   0  -9   9    8.35    0.82 
   0   9 -10   88.88    2.44 
   0   9  10   87.67    2.35 
   0   9  10   84.01    3.32 
   0   9  11    1.97    0.60 
   0   9  11    3.53    0.59 
   0   9  11    2.54    0.38 
   0   9 -11    2.57    0.55 
   0   9  12    4.38    0.61 
   0   9 -12    3.10    0.59 
   0   9  12    4.06    0.69 
   0   9  12    3.73    0.74 
   0   9 -13   10.99    0.83 
   0   9  13   12.21    1.02 
   0   9  13   12.72    1.09 
   0   9 -14    0.91    0.55 
   0   9  14   -0.24    0.48 
   0   9  14    0.34    0.59 
   0  -9  14    1.26    0.91 
   0   9  15    2.07    0.74 
   0   9  15    1.67    0.64 
   0  -9  15    1.07    0.92 
   0   9  16   -0.71    0.57 
   0   9  17   19.41    1.43 
   0  10   0   80.98    2.39 
   0  10  -1    1.74    0.48 
   0  10   1    1.00    0.39 
   0  10  -2   26.89    1.22 
   0  10   2   26.66    1.28 
   0 -10   2   27.01    0.99 
   0 -10   2   28.42    0.89 
   0  10   3   23.29    1.19 
   0  10  -3   22.66    1.12 
   0 -10   3   23.15    0.89 
   0 -10   3   22.01    1.03 
   0  10   4   28.85    1.36 
   0  10  -4   26.76    1.22 
   0 -10   4   27.87    1.08 
   0 -10   4   25.15    1.24 
   0  10   5    6.39    0.76 
   0  10  -5    6.33    0.74 
   0 -10   5    5.57    0.59 
   0  10  -6    5.48    0.70 
   0  10   6    4.95    0.74 
   0 -10   6    6.71    0.68 
   0  10  -7    8.78    0.75 
   0  10   7    8.02    0.83 
   0  10  -8   -0.10    0.33 
   0  10   8   -0.35    0.51 
   0  10  -9    7.95    0.74 
   0  10   9    8.00    0.89 
   0  10 -10    1.36    0.50 
   0  10  10    1.52    0.60 
   0  10  11   14.33    1.15 
   0  10 -11   13.82    0.91 
   0  10 -12    0.89    0.46 
   0  10  12    0.71    0.58 
   0 -10  12    1.90    0.86 
   0  10 -13    0.83    0.53 
   0  10  13    0.74    0.55 
   0 -10  13    0.79    0.71 
   0  10  14    1.79    0.69 
   0  10  14    2.20    1.02 
   0  10 -14   -0.06    0.58 
   0 -10  14   -0.05    1.06 
   0 -10  15    0.65    0.97 
   0  10  16    2.36    0.81 
   0  11   0    0.17    0.37 
   0  11   1    0.71    0.47 
   0  11  -1    0.43    0.41 
   0  11  -2   51.13    1.83 
   0  11   2   52.54    1.92 
   0  11  -3    9.03    0.78 
   0  11   3    8.33    0.82 
   0 -11   3    9.21    0.68 
   0 -11   3    8.61    0.55 
   0  11  -4   48.01    1.76 
   0  11   4   49.66    1.90 
   0 -11   4   48.42    1.73 
   0 -11   4   48.56    1.51 
   0  11  -5   -0.09    0.35 
   0  11   5   -0.44    0.33 
   0 -11   5    0.02    0.40 
   0  11   6    0.41    0.61 
   0  11  -6    0.02    0.38 
   0 -11   6    0.91    0.39 
   0 -11   6    0.54    0.51 
   0  11   7    0.60    0.47 
   0  11  -7    2.06    0.54 
   0 -11   7    2.57    0.73 
   0  11   8    0.88    0.52 
   0  11  -8    0.63    0.41 
   0 -11   8    0.91    0.58 
   0  11   9    1.29    0.56 
   0  11  -9    1.69    0.55 
   0 -11   9    2.00    0.79 
   0  11  10    9.15    1.00 
   0  11 -10    8.67    0.83 
   0 -11  10    9.68    1.35 
   0  11  11    6.87    0.96 
   0  11 -11    6.77    0.78 
   0 -11  11    5.15    1.09 
   0  11 -12    6.05    0.87 
   0  11  12    6.49    0.98 
   0 -11  12    7.31    1.36 
   0  11 -13    0.62    0.61 
   0  11  13    0.46    0.54 
   0 -11  13    1.02    0.92 
   0  11  14    0.23    0.65 
   0 -11  14    0.56    1.09 
   0  11  15    4.56    0.93 
   0  12   0    8.69    0.85 
   0  12   1    6.21    0.86 
   0  12  -1    6.74    0.76 
   0  12  -2   -0.48    0.33 
   0  12  -3   23.91    1.26 
   0  12   3   25.10    1.38 
   0  12  -4    2.64    0.61 
   0  12   4    1.84    0.57 
   0 -12   4    2.99    0.57 
   0 -12   4    2.55    0.39 
   0  12  -5    5.72    0.75 
   0  12   5    6.59    0.89 
   0 -12   5    6.99    0.71 
   0 -12   5    6.09    0.75 
   0  12  -6    0.18    0.41 
   0  12   6    0.02    0.39 
   0 -12   6    0.03    0.42 
   0  12   7    0.55    0.50 
   0  12  -7    0.27    0.39 
   0 -12   7    0.08    0.48 
   0  12  -8    4.75    0.78 
   0  12   8    4.44    0.81 
   0 -12   8    4.24    0.90 
   0  12  -9    8.27    0.85 
   0  12   9   10.72    1.05 
   0  12 -10    0.08    0.43 
   0  12  10    0.45    0.54 
   0 -12  10   -0.45    0.57 
   0  12  11    6.93    1.01 
   0  12 -11    6.50    1.04 
   0 -12  11    9.82    1.53 
   0 -12  12    5.88    1.33 
   0  12  13    2.88    0.81 
   0  12 -13    2.79    0.89 
   0 -12  13    3.22    1.23 
   0  12  14    3.19    0.97 
   0 -12  14    4.47    1.61 
   0  13   0   -0.31    0.38 
   0  13   1    1.38    0.56 
   0  13  -1    1.50    0.58 
   0  13   2    8.91    0.92 
   0  13  -2   10.20    0.94 
   0  13   3   -0.01    0.42 
   0  13  -3    0.03    0.37 
   0  13   4    2.23    0.61 
   0  13  -4    3.03    0.65 
   0 -13   4    1.75    0.43 
   0 -13   4    3.00    0.55 
   0  13   5    3.84    0.75 
   0  13  -5    2.90    0.63 
   0 -13   5    2.50    0.62 
   0 -13   5    3.41    0.54 
   0  13  -6    1.51    0.52 
   0  13   6    1.74    0.59 
   0 -13   6    0.40    0.50 
   0  13  -7    1.06    0.52 
   0  13   7    0.72    0.55 
   0 -13   7   -0.08    0.53 
   0  13   8    3.63    0.79 
   0  13  -8    2.73    0.65 
   0 -13   8    2.50    0.84 
   0  13   9    1.01    0.58 
   0  13  -9    1.70    0.59 
   0 -13   9    0.69    0.80 
   0  13 -10    2.43    0.71 
   0  13  10    3.29    0.95 
   0 -13  10    3.25    1.06 
   0  13  11   17.36    1.38 
   0  13 -11   17.76    1.25 
   0 -13  11   15.56    1.68 
   0  13  12    0.89    0.68 
   0  13 -12    1.46    0.77 
   0 -13  12    2.53    1.14 
   0 -13  13    1.35    1.15 
   0  14   0   39.61    1.82 
   0  14   1    2.43    0.64 
   0  14  -1    4.04    0.76 
   0  14  -2    1.98    0.56 
   0  14   2    1.36    0.62 
   0  14   3    3.66    0.72 
   0  14  -3    2.99    0.74 
   0  14  -4   20.49    1.28 
   0  14   4   21.82    1.40 
   0  14  -5    0.36    0.50 
   0  14   5   -0.72    0.36 
   0 -14   5    0.32    0.46 
   0  14  -6    1.15    0.53 
   0  14   6    1.30    0.59 
   0 -14   6    1.55    0.64 
   0  14  -7    3.48    0.75 
   0  14   7    4.15    0.83 
   0 -14   7    2.77    0.84 
   0  14  -8    2.96    0.73 
   0 -14   8    3.77    0.89 
   0  14   9    1.32    0.64 
   0  14  -9    1.70    0.63 
   0 -14   9    3.12    0.99 
   0  14  10   10.67    1.20 
   0  14 -10   10.19    1.05 
   0 -14  10   13.71    1.49 
   0  14 -11    2.65    0.85 
   0 -14  11    3.27    1.26 
   0  14 -12    4.50    1.05 
   0 -14  12    6.54    1.54 
   0  15   0    0.51    0.56 
   0  15   1    8.68    1.02 
   0  15  -1    9.16    1.02 
   0  15   2    0.98    0.61 
   0  15  -2    1.24    0.55 
   0  15  -3    1.67    0.64 
   0  15   3    1.80    0.71 
   0  15   4   -0.16    0.49 
   0  15  -4    0.07    0.51 
   0  15  -5   11.13    1.07 
   0  15  -6    9.98    1.07 
   0  15   6   12.30    1.18 
   0 -15   6   14.01    1.18 
   0  15   7    2.68    0.70 
   0  15  -7    2.52    0.68 
   0 -15   7    2.60    0.92 
   0  15  -8    2.60    0.77 
   0  15   8    2.57    0.76 
   0  15  -9    1.12    0.64 
   0 -15   9    1.10    1.04 
   0  15 -10    6.86    1.07 
   0 -15  10   11.84    1.67 
   0  15 -11    3.68    1.13 
   0 -15  11    5.72    1.70 
   0 -15  12    4.06    1.68 
   0  16  -1    0.34    0.90 
   0  16   1    0.11    0.55 
   0  16   2   14.08    1.26 
   0  16  -2   11.14    1.53 
   0  16  -3   12.64    1.21 
   0  16   3   15.15    1.31 
   0  16  -4    7.55    1.12 
   0  16   4   12.79    1.23 
   0  16   5    4.80    0.97 
   0  16  -5    3.89    1.15 
   0  16  -7    2.37    1.26 
   0  16  -8    2.85    0.88 
   0  16  -9    1.00    0.79 
   0  16 -10    4.66    1.17 
   0  17   0    0.31    0.63 
   0  17  -1    2.17    0.78 
   0  17   1    2.00    1.07 
   0  17  -2   18.06    1.43 
   0  17  -3    7.32    1.07 
   0  17  -4    4.15    0.90 
   0  17  -5    0.55    0.68 
   0  17  -6    2.96    0.93 
  -1   0  18    1.11    1.02 
  -1   0  18    0.55    0.54 
  -1   0  17   -0.73    0.67 
  -1   0  17    0.79    0.46 
  -1   0  16    0.50    0.43 
  -1   0  16    1.38    0.79 
  -1   0  15    0.83    0.38 
  -1   0  14   28.52    1.16 
  -1   0  14   29.52    1.21 
   1   0 -13   -0.63    0.43 
  -1   0  13   -0.23    0.31 
   1   0 -12    8.82    1.07 
  -1   0  12    9.75    0.64 
   1   0 -11    0.11    0.27 
   1   0 -11   -0.59    0.39 
  -1   0  11   -0.04    0.26 
  -1   0  10    4.04    0.50 
   1   0 -10    3.59    0.46 
   1   0 -10    3.31    0.67 
  -1   0  10    4.08    0.71 
  -1   0   9    0.04    0.21 
   1   0  -9    0.17    0.22 
   1   0  -9   -0.03    0.33 
  -1   0   9   -0.16    0.31 
   1   0  -8    9.95    0.55 
   1   0  -8   10.09    0.86 
  -1   0   8    9.83    0.79 
  -1   0   8   10.40    0.55 
  -1   0   7   -0.11    0.19 
  -1   0   7    0.15    0.25 
   1   0  -7    0.25    0.22 
   1   0  -7    0.22    0.37 
   1   0  -6    3.19    0.38 
   1   0  -6    3.02    0.51 
  -1   0   6    2.18    0.43 
   1   0  -5    0.27    0.17 
  -1   0   5    0.09    0.14 
   1   0  -5   -0.05    0.21 
  -1   0   5    0.11    0.20 
  -1   0   4  124.44    2.57 
  -1   0   4  122.89    2.86 
   1   0  -4  129.96    2.92 
   1   0  -4  127.15    2.58 
   1   0  -3   -0.10    0.13 
   1   0  -3    0.16    0.19 
  -1   0   3   -0.05    0.12 
  -1   0   3   -0.14    0.17 
  -1   0   2   27.09    0.78 
  -1   0   2   28.84    0.67 
   1   0  -2   28.16    0.72 
  -1   0   2   26.48    0.77 
   1   0  -1    0.06    0.03 
   1   0  -1    0.24    0.07 
  -1   0   1    0.11    0.06 
   1   0   1    0.11    0.06 
  -1   0  -2  428.53    8.08 
   1   0   2  424.35    7.82 
   1   0   2  427.38    7.82 
   1   0   2  415.97    8.03 
   1   0   3    0.01    0.08 
   1   0   3    0.04    0.15 
  -1   0  -3   -0.02    0.14 
  -1   0  -4  576.50   10.88 
   1   0   4  536.01   10.36 
  -1   0  -4  558.51   10.37 
   1   0   4  560.49   10.75 
  -1   0  -5    0.25    0.17 
   1   0   5    0.02    0.24 
   1   0   5    0.11    0.15 
  -1   0  -5   -0.40    0.23 
   1   0   6   33.87    1.27 
  -1   0  -6   33.66    1.37 
  -1   0  -6   33.96    0.89 
   1   0   6   33.08    0.89 
   1   0   7    0.00    0.25 
  -1   0  -7    0.37    0.34 
   1   0   7    0.06    0.17 
  -1   0  -8   39.66    1.68 
   1   0   8   39.73    1.10 
   1   0   9    0.08    0.20 
  -1   0  -9   -0.12    0.38 
   1   0   9    0.49    0.37 
   1   0  10   48.77    1.34 
  -1   0 -10   47.57    2.11 
   1   0  10   48.92    1.37 
   1   0  11    0.05    0.21 
  -1   0 -11    0.01    0.51 
   1   0  11    0.01    0.28 
  -1   0 -12    5.37    1.11 
   1   0  12    4.02    0.48 
   1   0  12    3.24    0.46 
   1   0  13   -0.22    0.26 
   1   0  13    0.03    0.28 
   1   0  14   12.79    0.69 
  -1   0 -14   13.58    1.44 
   1   0  14   12.28    0.73 
   1   0  15    0.33    0.38 
  -1   0 -15    0.20    0.60 
   1   0  15    0.93    0.47 
  -1   0 -16   48.80    2.76 
   1   0  18   33.57    3.28 
  -1   1  18   26.96    1.31 
  -1   1  18   22.25    2.12 
  -1  -1  18   26.02    2.28 
  -1   1  17    0.05    0.47 
  -1   1  17    0.54    0.88 
  -1  -1  17    0.38    0.70 
  -1  -1  17   -0.20    0.40 
  -1   1  16    1.40    0.51 
  -1   1  16    0.90    0.81 
  -1  -1  16    1.03    0.42 
  -1  -1  16    0.86    0.71 
  -1   1  15   23.25    1.84 
  -1   1  15   25.83    1.18 
  -1  -1  15   24.71    1.09 
  -1   1  14    1.63    0.48 
  -1   1  14    1.75    0.47 
  -1  -1  14    3.06    0.52 
   1   1 -13    4.83    0.59 
   1   1 -13    3.59    0.85 
  -1   1  13    3.25    0.58 
  -1   1  13    4.71    0.60 
  -1  -1  13    4.81    0.65 
   1   1 -12    2.93    0.48 
   1   1 -12    3.47    0.87 
   1  -1 -12    3.61    0.81 
  -1  -1  12    2.74    0.47 
   1   1 -11    2.41    0.80 
  -1   1  11    2.08    0.45 
   1   1 -11    1.65    0.38 
  -1  -1  11    2.02    0.40 
   1  -1 -11    2.10    0.66 
  -1   1  10   17.60    1.12 
   1   1 -10   18.50    0.80 
  -1   1  10   16.73    0.80 
   1   1 -10   17.62    1.27 
  -1  -1  10   18.46    0.78 
   1  -1 -10   18.04    1.23 
   1  -1 -10   17.61    0.80 
   1   1  -9   83.15    2.73 
   1   1  -9   77.24    1.95 
  -1   1   9   83.04    3.46 
  -1   1   9   78.17    2.01 
  -1  -1   9   80.96    2.55 
   1  -1  -9   80.79    2.64 
   1  -1  -9   81.43    2.03 
  -1  -1   9   79.23    1.96 
   1   1  -8    7.09    0.47 
  -1   1   8    7.43    0.49 
  -1   1   8    7.15    0.68 
  -1  -1   8    7.87    0.74 
   1  -1  -8    7.50    0.75 
   1  -1  -8    7.80    0.51 
  -1  -1   8    7.45    0.46 
  -1   1   7   31.76    1.30 
   1   1  -7   32.37    1.43 
   1   1  -7   31.27    0.98 
  -1   1   7   31.44    1.01 
   1  -1  -7   32.56    1.02 
  -1  -1   7   33.05    0.98 
   1  -1  -7   34.00    1.41 
  -1  -1   7   35.67    1.41 
  -1   1   6   17.92    0.91 
   1   1  -6   17.32    0.65 
  -1   1   6   16.15    0.66 
   1   1  -6   16.69    0.97 
   1  -1  -6   16.77    0.93 
  -1  -1   6   15.94    0.91 
   1  -1  -6   16.43    0.67 
   1   1  -5   51.11    1.64 
  -1   1   5   51.76    1.32 
  -1   1   5   50.86    1.53 
   1   1  -5   52.14    1.26 
   1  -1  -5   52.70    1.31 
   1  -1  -5   53.41    1.60 
  -1  -1   5   53.31    1.27 
  -1  -1   5   51.60    1.60 
   1   1  -4    0.09    0.18 
   1   1  -4    0.46    0.14 
  -1   1   4    0.07    0.17 
   1  -1  -4    0.48    0.17 
   1  -1  -4    0.06    0.18 
  -1   1   3   18.24    0.67 
   1   1  -3   18.87    0.54 
   1   1  -3   17.76    0.72 
  -1   1   3   18.10    0.56 
   1  -1  -3   18.41    0.57 
  -1  -1   3   17.67    0.72 
  -1  -1   3   17.71    0.53 
  -1   1   1    8.72    0.26 
   1   1  -1    7.86    0.31 
   1   1  -1    8.49    0.32 
  -1   1   1    7.76    0.28 
  -1  -1   1    8.27    0.28 
  -1   1   0   56.88    1.07 
   1   1   0   50.32    1.04 
   1   1   0   54.56    1.08 
   1  -1   0   47.22    1.06 
   1   1   1  218.55    4.07 
  -1   1  -1  214.49    4.15 
   1   1   1  211.13    4.07 
  -1   1  -1  217.50    3.99 
   1  -1   1  214.08    3.99 
  -1  -1  -1  214.32    4.07 
  -1   1  -2  234.44    4.64 
   1   1   2  232.24    4.51 
   1   1   2  237.21    4.52 
   1  -1   2  229.38    4.59 
  -1  -1  -2  231.57    4.55 
  -1  -1  -2  234.64    4.43 
   1   1   3    0.21    0.16 
   1   1   3    0.37    0.13 
   1   1   3   -0.05    0.11 
  -1   1  -3    0.25    0.19 
  -1   1  -3    0.48    0.09 
  -1  -1  -3    0.33    0.18 
   1  -1   3    0.20    0.18 
   1  -1   3    0.22    0.08 
  -1   1  -4   10.35    0.40 
  -1   1  -4   10.25    0.62 
   1   1   4   10.60    0.41 
   1   1   4   10.04    0.40 
   1  -1   4   10.42    0.33 
   1  -1   4   10.37    0.57 
  -1  -1  -4    9.16    0.55 
   1   1   5   11.42    0.48 
   1   1   5   10.52    0.63 
  -1   1  -5   10.92    0.74 
  -1   1  -5   10.63    0.40 
   1   1   5   10.62    0.47 
  -1  -1  -5   10.54    0.69 
   1  -1   5   11.16    0.68 
   1  -1   5   10.93    0.39 
  -1   1  -6   25.86    0.73 
   1   1   6   25.23    0.81 
  -1   1  -6   26.21    1.22 
   1   1   6   26.47    0.81 
   1   1   6   27.44    1.08 
  -1  -1  -6   26.15    1.17 
   1  -1   6   26.66    1.12 
   1  -1   6   26.20    0.72 
  -1   1  -7  128.21    3.46 
   1   1   7  131.58    3.22 
  -1   1  -7  130.21    2.68 
   1   1   7  129.18    2.78 
   1   1   7  127.91    2.79 
   1  -1   7  134.80    3.32 
  -1  -1  -7  132.68    3.42 
   1  -1   7  126.22    2.67 
   1   1   8    2.88    0.34 
  -1   1  -8    2.67    0.29 
   1   1   8    3.55    0.41 
  -1   1  -8    4.61    0.79 
   1   1   8    3.21    0.56 
   1  -1   8    2.70    0.35 
   1  -1   8    3.93    0.65 
  -1  -1  -8    2.88    0.62 
   1   1   9    9.75    0.56 
   1   1   9    9.66    0.54 
  -1   1  -9    9.94    0.95 
  -1   1  -9    9.82    0.49 
   1   1   9    9.09    0.76 
  -1  -1  -9   10.57    0.95 
   1  -1   9    9.07    0.48 
   1  -1   9   10.81    0.87 
   1   1  10    6.21    0.49 
   1   1  10    6.52    0.53 
  -1   1 -10   11.69    1.45 
   1  -1  10    6.32    0.44 
  -1  -1 -10    7.48    0.99 
  -1   1 -11   -0.66    0.39 
   1   1  11    0.36    0.27 
   1   1  11    0.88    0.32 
   1  -1  11    0.99    0.28 
  -1  -1 -11    0.89    0.61 
   1   1  12    0.52    0.31 
   1   1  12    0.83    0.35 
  -1   1 -12    1.42    0.64 
  -1  -1 -12   -0.14    0.52 
   1  -1  12    0.60    0.31 
   1  -1  12    0.67    0.28 
  -1   1 -13   21.59    1.67 
   1   1  13   22.32    0.97 
   1   1  13   22.27    0.94 
  -1  -1 -13   23.95    1.73 
   1  -1  13   20.04    0.86 
   1  -1  13   20.92    0.84 
   1   1  14   21.38    1.15 
  -1   1 -14   21.83    1.76 
  -1  -1 -14   23.67    1.77 
   1  -1  14   20.66    0.87 
   1  -1  14   20.73    0.84 
   1   1  15   33.75    1.26 
   1   1  15   32.74    1.72 
  -1   1 -15   32.86    2.23 
  -1  -1 -15   32.35    2.17 
  -1   1 -16   17.92    1.73 
   1   1  16   19.61    0.95 
  -1  -1 -16   18.68    1.74 
   1   1  18    1.69    0.96 
  -1   2  18    1.73    1.03 
  -1   2  18    0.82    0.58 
  -1  -2  18    1.20    0.95 
  -1   2  17    1.58    0.54 
  -1   2  17    0.60    0.81 
  -1  -2  17    2.99    0.53 
  -1  -2  17    2.35    1.40 
  -1   2  16    0.03    0.64 
  -1   2  16    0.51    0.45 
  -1  -2  16   -0.28    0.59 
  -1   2  15   27.42    1.25 
   1   2 -15   24.23    1.04 
  -1   2  15   24.49    1.84 
  -1  -2  15   25.54    1.08 
  -1   2  14    1.03    0.44 
   1   2 -14    1.64    0.42 
  -1  -2  14    2.32    0.46 
   1   2 -13    3.84    0.79 
  -1   2  13    4.59    0.66 
  -1   2  13    5.12    0.66 
   1   2 -13    5.02    1.10 
  -1  -2  13    5.60    0.62 
  -1   2  12   13.05    0.83 
  -1   2  12   12.69    0.81 
   1   2 -12   12.66    1.27 
   1   2 -12   13.15    0.73 
  -1  -2  12   13.41    0.72 
   1   2 -11    6.61    1.07 
  -1   2  11    5.42    0.59 
   1   2 -11    4.62    0.50 
  -1   2  11    6.96    0.82 
  -1  -2  11    5.25    0.49 
   1  -2 -11    5.03    0.82 
   1   2 -10   18.55    1.31 
   1   2 -10   18.48    0.80 
  -1   2  10   17.31    0.85 
  -1   2  10   18.46    1.12 
  -1   2  10   18.49    0.90 
   1  -2 -10   20.21    1.27 
  -1  -2  10   18.25    0.78 
   1   2  -9    3.54    0.73 
  -1   2   9    3.75    0.66 
   1   2  -9    3.95    0.47 
  -1   2   9    3.35    0.46 
  -1   2   9    3.89    0.45 
   1  -2  -9    2.56    0.55 
  -1  -2   9    3.94    0.44 
  -1  -2   9    2.52    0.52 
  -1   2   8   38.34    1.22 
   1   2  -8   38.58    1.14 
   1   2  -8   41.35    1.73 
  -1   2   8   39.23    1.49 
   1  -2  -8   38.70    1.57 
  -1  -2   8   40.01    1.87 
  -1  -2   8   37.75    1.13 
   1   2  -7   27.99    0.90 
   1   2  -7   28.61    1.36 
  -1   2   7   27.14    1.17 
  -1   2   7   27.03    0.96 
  -1  -2   7   28.43    1.29 
  -1  -2   7   28.29    0.89 
   1  -2  -7   29.22    1.26 
   1   2  -6    1.15    0.44 
   1   2  -6    1.65    0.30 
  -1   2   6    2.06    0.36 
  -1   2   6    1.37    0.36 
   1  -2  -6    1.07    0.41 
  -1  -2   6    2.22    0.54 
  -1  -2   6    2.14    0.38 
   1   2  -5    0.01    0.26 
   1   2  -5    0.34    0.19 
  -1   2   5    0.24    0.20 
  -1   2   5   -0.12    0.25 
  -1  -2   5   -0.07    0.23 
  -1  -2   5   -0.04    0.15 
   1  -2  -5    0.12    0.25 
   1   2  -4   95.70    2.01 
  -1   2   4   91.00    2.16 
   1   2  -4   92.50    2.36 
  -1   2   4   93.16    2.21 
  -1  -2   4   91.62    1.98 
  -1  -2   4   94.28    2.33 
  -1   2   3   72.40    1.64 
  -1   2   3   75.49    1.66 
  -1   2   3   68.80    1.65 
   1   2  -3   72.10    1.84 
  -1   2   3   69.51    1.66 
   1   2  -3   73.57    1.59 
  -1  -2   3   72.88    1.82 
  -1  -2   3   72.95    1.57 
  -1   2   2  241.58    4.58 
   1   2  -2  241.67    4.53 
  -1   2   2  228.70    4.48 
  -1  -2   2  230.51    4.51 
   1  -2  -2  230.56    4.51 
  -1   2   1   34.82    0.71 
  -1   2   1   33.88    0.85 
   1   2  -1   34.40    0.83 
   1  -2  -1   33.14    0.84 
   1  -2  -1   34.07    0.72 
  -1  -2   1   33.12    0.82 
  -1   2   0  375.72    7.10 
   1   2   0  385.94    7.13 
   1   2   0  371.63    7.02 
  -1   2   0  381.78    7.05 
  -1  -2   0  377.20    7.13 
  -1  -2   0  374.83    7.00 
   1  -2   0  381.41    7.04 
   1  -2   0  379.50    7.10 
   1   2   1  134.80    2.62 
   1   2   1  135.85    2.74 
  -1   2  -1  140.04    2.68 
  -1   2  -1  136.16    2.77 
  -1  -2  -1  139.68    2.63 
   1  -2   1  135.47    2.67 
  -1  -2  -1  136.87    2.74 
   1   2   2   17.03    0.49 
  -1   2  -2   16.84    0.64 
   1   2   2   17.24    0.54 
   1  -2   2   17.69    0.61 
  -1  -2  -2   14.20    0.51 
  -1  -2  -2   17.04    0.52 
   1  -2   2   16.54    0.45 
  -1   2  -3  194.85    3.63 
   1   2   3  188.86    3.78 
  -1   2  -3  184.10    4.02 
   1   2   3  190.30    3.76 
  -1  -2  -3  186.98    3.85 
   1  -2   3  186.63    3.60 
   1   2   4   -0.06    0.14 
  -1   2  -4    0.00    0.11 
  -1   2  -4   -0.39    0.16 
   1   2   4    0.05    0.17 
   1  -2   4   -0.08    0.19 
   1  -2   4   -0.03    0.10 
  -1  -2  -4   -0.13    0.16 
  -1   2  -5    2.93    0.25 
   1   2   5    2.69    0.33 
   1   2   5    2.00    0.34 
  -1   2  -5    3.38    0.57 
   1  -2   5    2.36    0.39 
  -1  -2  -5    2.51    0.43 
   1  -2   5    2.16    0.23 
   1   2   6    8.11    0.59 
   1   2   6    8.84    0.50 
  -1   2  -6    8.71    0.39 
  -1   2  -6    7.15    0.70 
   1   2   6    8.29    0.49 
   1  -2   6    7.72    0.66 
  -1  -2  -6    8.90    0.69 
   1  -2   6    8.45    0.38 
   1   2   7   18.59    0.73 
   1   2   7   17.56    0.87 
  -1   2  -7   17.07    0.58 
   1   2   7   17.78    0.71 
  -1  -2  -7   17.34    1.00 
   1  -2   7   17.14    0.58 
   1  -2   7   16.28    0.94 
   1   2   8   24.31    1.10 
  -1   2  -8   25.08    1.35 
   1   2   8   23.74    0.89 
  -1   2  -8   23.44    0.74 
   1   2   8   24.59    0.89 
   1  -2   8   24.07    1.19 
   1  -2   8   24.20    0.74 
  -1   2  -9   35.99    1.00 
   1   2   9   37.34    1.46 
   1   2   9   35.66    1.16 
   1   2   9   34.94    1.15 
  -1   2  -9   32.63    1.70 
   1  -2   9   36.21    1.01 
  -1  -2  -9   31.64    1.59 
  -1   2 -10   22.76    0.78 
  -1   2 -10   23.95    1.51 
   1   2  10   22.76    0.92 
   1   2  10   22.67    0.94 
   1  -2  10   22.53    0.78 
  -1  -2 -10   22.34    1.40 
   1   2  11   16.19    0.80 
   1   2  11   15.68    0.82 
  -1   2 -11   15.58    0.66 
  -1   2 -11   14.30    1.30 
   1  -2  11   16.25    0.67 
  -1  -2 -11   16.37    1.28 
   1   2  12    5.29    0.61 
  -1   2 -12    4.98    0.96 
   1  -2  12    3.87    0.41 
  -1  -2 -12    4.62    0.96 
   1   2  13    0.75    0.36 
  -1   2 -13    0.12    0.55 
   1   2  13    0.48    0.41 
  -1  -2 -13    0.98    0.58 
   1   2  14    0.48    0.36 
   1   2  14   -0.85    0.32 
  -1   2 -14    0.55    0.68 
  -1  -2 -14   -0.05    0.58 
   1  -2  14    0.70    0.30 
   1  -2  14   -0.04    0.28 
  -1   2 -15    1.76    0.80 
   1   2  15    3.09    0.52 
  -1  -2 -15    1.62    0.81 
  -1   2 -16    1.97    0.82 
   1   2  16    1.79    0.48 
   1   2  17    1.15    0.51 
   1   2  18    7.25    1.49 
  -1   3  19    0.65    1.13 
  -1   3  18    0.40    1.49 
  -1  -3  18    1.71    0.99 
  -1   3  17   22.29    1.89 
  -1   3  17   18.98    1.17 
  -1  -3  17   19.60    2.42 
  -1   3  16    9.96    0.89 
  -1   3  16   14.03    1.84 
  -1  -3  16    9.56    1.57 
  -1   3  15    1.89    0.75 
   1   3 -15    2.00    0.47 
  -1   3  15    2.12    0.60 
  -1  -3  15    3.26    0.53 
   1   3 -14    0.65    0.34 
  -1   3  14    0.76    0.45 
  -1   3  14    0.36    0.65 
  -1  -3  14    0.89    0.42 
   1   3 -13   26.08    2.12 
   1   3 -13   22.48    1.41 
  -1   3  13   24.99    1.18 
  -1  -3  13   25.42    1.01 
   1   3 -12   26.77    1.75 
  -1   3  12   24.75    1.16 
  -1   3  12   25.78    1.15 
   1   3 -12   25.97    1.02 
  -1  -3  12   26.13    1.00 
  -1   3  11    5.42    0.70 
   1   3 -11    4.38    0.49 
  -1   3  11    5.57    0.71 
   1   3 -11    5.82    0.99 
  -1  -3  11    4.46    0.48 
  -1   3  10  208.69    4.55 
   1   3 -10  199.81    4.30 
  -1   3  10  207.24    4.90 
   1   3 -10  205.65    5.42 
  -1   3  10  204.43    4.79 
  -1  -3  10  197.65    4.28 
  -1   3   9   23.99    1.15 
  -1   3   9   22.10    0.95 
   1   3  -9   23.03    0.87 
  -1   3   9   22.25    0.99 
   1   3  -9   20.37    1.33 
  -1  -3   9   21.88    0.83 
  -1  -3   9   23.56    1.29 
   1   3  -8   52.37    2.03 
  -1   3   8   50.57    1.71 
   1   3  -8   53.34    1.43 
  -1   3   8   52.22    1.56 
  -1   3   8   50.11    1.52 
  -1  -3   8   53.31    1.96 
   1  -3  -8   53.49    1.86 
  -1  -3   8   48.64    1.37 
  -1   3   7    2.14    0.39 
  -1   3   7    1.78    0.35 
   1   3  -7    1.61    0.31 
  -1   3   7    1.68    0.37 
   1   3  -7    2.60    0.62 
  -1  -3   7    2.29    0.33 
  -1  -3   7    1.17    0.38 
   1  -3  -7    1.58    0.42 
   1   3  -6   56.80    1.44 
  -1   3   6   54.69    1.55 
  -1   3   6   55.92    1.54 
   1   3  -6   56.67    1.93 
  -1   3   6   56.08    1.65 
  -1  -3   6   55.15    1.41 
  -1  -3   6   56.66    1.85 
  -1   3   5   35.79    1.11 
  -1   3   5   34.79    1.09 
   1   3  -5   32.29    1.33 
  -1   3   5   32.15    1.12 
   1   3  -5   35.08    1.00 
  -1  -3   5   35.37    1.09 
  -1  -3   5   34.06    1.30 
   1   3  -4  173.00    3.93 
  -1   3   4  172.01    3.65 
   1   3  -4  176.75    3.55 
  -1   3   4  167.03    3.61 
  -1   3   4  179.32    3.65 
  -1   3   4  178.06    3.65 
  -1  -3   4  172.23    3.53 
  -1  -3   4  173.16    3.88 
  -1   3   3   -0.07    0.12 
  -1   3   3    0.06    0.16 
   1   3  -3    0.07    0.13 
  -1   3   3    0.11    0.13 
   1   3  -3    0.05    0.16 
  -1  -3   3    0.05    0.17 
  -1  -3   3   -0.09    0.10 
   1   3  -2  262.65    5.10 
  -1   3   2  256.17    5.15 
   1  -3  -2  265.88    5.16 
  -1  -3   2  262.92    5.10 
  -1   3   1    0.81    0.19 
   1   3  -1    0.95    0.18 
  -1  -3   1    0.80    0.17 
  -1  -3   1    1.00    0.20 
  -1  -3   1    0.47    0.15 
   1  -3  -1    0.82    0.17 
  -1   3   0   97.88    2.15 
   1   3   0  107.21    2.22 
  -1   3   0  106.10    2.20 
   1  -3   0  106.88    2.06 
  -1  -3   0  104.01    2.22 
   1  -3   0  103.15    2.19 
  -1   3  -1    6.57    0.32 
   1   3   1    6.87    0.36 
  -1   3  -1    6.48    0.35 
   1  -3   1    6.01    0.31 
   1  -3   1    6.80    0.33 
  -1  -3  -1    6.93    0.36 
  -1   3  -2    1.53    0.25 
   1   3   2    1.64    0.24 
  -1   3  -2    2.06    0.20 
   1   3   2    1.73    0.14 
   1  -3   2    1.72    0.19 
   1  -3   2    1.22    0.22 
  -1  -3  -2    2.48    0.30 
  -1   3  -3   18.12    0.80 
   1   3   3   20.33    0.69 
  -1   3  -3   20.16    0.58 
   1   3   3   19.21    0.59 
  -1  -3  -3   19.08    0.67 
   1  -3   3   19.85    0.58 
   1  -3   3   19.29    0.76 
  -1  -3  -3   20.82    0.79 
   1   3   4  160.79    3.33 
  -1   3  -4  161.31    3.14 
   1   3   4  159.00    3.28 
  -1   3  -4  159.88    3.67 
  -1  -3  -4  142.55    3.27 
   1  -3   4  160.75    3.13 
  -1  -3  -4  157.22    3.40 
   1  -3   4  157.63    3.53 
  -1   3  -5   -0.15    0.16 
  -1   3  -5    0.50    0.35 
   1   3   5    0.06    0.23 
   1   3   5   -0.03    0.24 
   1   3   5    0.03    0.22 
  -1  -3  -5    0.00    0.27 
   1  -3   5   -0.08    0.16 
   1  -3   5    0.09    0.29 
   1   3   6    6.87    0.49 
   1   3   6    6.72    0.49 
  -1   3  -6    6.37    0.69 
  -1   3  -6    6.49    0.36 
   1   3   6    6.27    0.50 
  -1  -3  -6    6.68    0.61 
   1  -3   6    5.92    0.60 
   1  -3   6    6.43    0.35 
  -1   3  -7    4.77    0.80 
  -1   3  -7    3.47    0.30 
   1   3   7    4.40    0.55 
   1   3   7    3.33    0.42 
   1   3   7    3.96    0.47 
   1  -3   7    3.13    0.62 
  -1  -3  -7    3.68    0.60 
   1  -3   7    3.09    0.28 
   1   3   8   46.27    1.40 
   1   3   8   46.44    1.56 
  -1   3  -8   46.01    1.92 
   1   3   8   45.10    1.38 
  -1   3  -8   46.38    1.19 
  -1  -3  -8   45.89    1.76 
   1  -3   8   44.37    1.72 
  -1   3  -9    3.03    0.36 
   1   3   9    3.18    0.52 
  -1   3  -9    3.47    0.74 
   1   3   9    3.17    0.51 
   1   3   9    2.54    0.45 
  -1  -3  -9    3.51    0.69 
   1  -3   9    2.61    0.32 
  -1   3 -10    2.63    0.74 
   1   3  10    2.21    0.49 
  -1   3 -10    1.93    0.33 
   1   3  10    1.65    0.42 
   1   3  10    1.99    0.43 
  -1  -3 -10    1.74    0.63 
   1  -3  10    1.77    0.30 
   1   3  11   20.72    0.99 
  -1   3 -11   20.59    1.53 
   1   3  11   20.71    1.10 
  -1   3 -11   20.21    0.76 
  -1  -3 -11   21.77    1.44 
   1  -3  11   20.00    0.74 
   1   3  12    0.23    0.36 
   1   3  12    0.50    0.37 
  -1   3 -12    0.23    0.54 
  -1   3 -12    0.15    0.25 
  -1  -3 -12    0.27    0.51 
   1  -3  12    0.00    0.23 
   1   3  13   18.67    0.98 
   1   3  13   17.44    0.95 
  -1   3 -13   19.93    1.64 
  -1  -3 -13   18.27    1.49 
  -1   3 -14    2.03    0.88 
   1   3  14    2.29    0.48 
  -1  -3 -14   -0.01    0.62 
  -1   3 -15    5.54    1.33 
   1   3  15    4.25    0.64 
  -1   3 -16    3.11    1.08 
   1   3  16    2.06    0.53 
   1   3  17   14.71    1.00 
   1   3  17   17.28    1.80 
   1   3  18    0.21    0.92 
  -1   4  19    9.93    1.59 
  -1   4  18   12.30    1.07 
  -1   4  18   20.40    3.85 
  -1   4  17    2.25    1.01 
  -1   4  17    3.84    0.82 
  -1  -4  17    3.09    1.02 
  -1   4  16    6.69    1.17 
  -1   4  16    4.86    0.78 
   1   4 -16    6.30    0.70 
  -1  -4  16    4.37    1.08 
  -1   4  15   21.40    1.21 
   1   4 -15   20.63    0.96 
  -1   4  15   20.75    1.69 
  -1  -4  15   19.64    0.99 
   1   4 -14    0.33    0.36 
  -1   4  14    0.05    0.59 
  -1   4  14   -0.22    0.45 
  -1  -4  14    0.59    0.38 
   1   4 -13    5.53    0.56 
  -1   4  13    7.88    1.10 
   1   4 -13    8.26    1.23 
  -1   4  13    6.07    0.71 
  -1  -4  13    6.82    0.67 
   1   4 -12    0.10    0.54 
  -1   4  12   -0.40    0.42 
   1   4 -12    0.00    0.30 
  -1   4  12    0.27    0.40 
  -1  -4  12   -0.59    0.26 
   1   4 -11    2.76    0.49 
  -1   4  11    2.47    0.53 
   1   4 -11    3.00    0.73 
  -1   4  11    2.61    0.54 
  -1   4  11    2.84    0.68 
  -1  -4  11    3.70    0.48 
  -1   4  10    0.66    0.40 
  -1   4  10    1.35    0.42 
  -1   4  10    1.08    0.42 
   1   4 -10    1.14    0.57 
   1   4 -10    1.00    0.34 
  -1  -4  10    1.21    0.33 
   1   4  -9   30.11    1.06 
  -1   4   9   29.72    1.28 
   1   4  -9   31.37    1.66 
  -1   4   9   32.84    1.25 
  -1  -4   9   30.65    1.03 
  -1   4   8   18.88    0.94 
  -1   4   8   18.10    0.89 
   1   4  -8   18.43    1.21 
   1   4  -8   19.14    0.78 
  -1   4   8   17.61    0.90 
  -1  -4   8   18.79    0.75 
  -1  -4   8   17.25    1.07 
  -1   4   7   51.22    1.55 
   1   4  -7   51.90    1.41 
  -1   4   7   48.22    1.54 
  -1   4   7   50.25    1.53 
  -1  -4   7   47.22    1.33 
  -1  -4   7   51.80    1.84 
  -1   4   6    0.66    0.30 
   1   4  -6    0.48    0.34 
  -1   4   6    0.37    0.26 
   1   4  -6    0.81    0.26 
  -1   4   6    0.89    0.31 
  -1   4   6    0.55    0.29 
  -1  -4   6    0.69    0.25 
  -1  -4   6    0.23    0.26 
   1   4  -5   13.27    0.88 
  -1   4   5   14.14    0.71 
  -1   4   5   12.72    0.67 
   1   4  -5   13.35    0.61 
  -1   4   5   14.58    0.66 
  -1   4   5   13.55    0.71 
  -1  -4   5   13.76    0.59 
  -1  -4   5   14.18    0.84 
  -1   4   4   56.01    1.52 
   1   4  -4   55.36    1.41 
   1   4  -4   54.13    1.71 
  -1   4   4   53.57    1.37 
  -1   4   4   51.43    1.35 
  -1  -4   4   56.76    1.67 
  -1  -4   4   53.62    1.38 
   1   4  -3   37.67    1.26 
   1   4  -3   38.78    1.09 
  -1   4   3   40.32    1.18 
   1  -4  -3   40.03    1.17 
  -1  -4   3   40.25    1.08 
   1   4  -2    2.51    0.32 
  -1   4   2    1.67    0.28 
  -1  -4   2    1.49    0.27 
  -1  -4   2    1.72    0.26 
   1  -4  -2    2.09    0.30 
  -1   4   1  145.92    3.05 
   1   4  -1  146.13    3.03 
  -1  -4   1  140.32    2.92 
  -1  -4   1  143.77    3.02 
  -1  -4   1  141.98    2.94 
   1  -4  -1  141.83    3.03 
   1   4   0    4.37    0.32 
  -1   4   0    3.87    0.28 
  -1   4   0    4.10    0.31 
   1  -4   0    3.90    0.20 
  -1  -4   0    4.37    0.33 
   1  -4   0    3.78    0.36 
  -1   4  -1    0.60    0.18 
  -1   4  -1    0.28    0.16 
   1   4   1    0.36    0.18 
   1  -4   1    0.37    0.13 
  -1  -4  -1    0.35    0.16 
   1  -4   1    0.25    0.18 
   1   4   2    1.87    0.29 
  -1   4  -2    2.23    0.34 
  -1   4  -2    2.66    0.30 
   1  -4   2    1.43    0.23 
   1  -4   2    2.20    0.28 
  -1  -4  -2    2.12    0.30 
  -1   4  -3   -0.10    0.23 
   1   4   3    0.24    0.13 
   1   4   3    0.31    0.25 
  -1   4  -3    0.36    0.19 
  -1  -4  -3    0.33    0.19 
   1  -4   3    0.39    0.20 
  -1  -4  -3    0.27    0.23 
   1  -4   3    0.06    0.22 
  -1   4  -4   28.86    0.83 
   1   4   4   27.07    0.81 
   1   4   4   27.84    0.97 
  -1   4  -4   28.04    1.17 
  -1  -4  -4   27.80    0.93 
   1  -4   4   26.17    1.04 
   1  -4   4   27.26    0.81 
  -1  -4  -4   27.66    0.95 
  -1   4  -5  277.53    6.03 
   1   4   5  275.03    5.64 
   1   4   5  277.95    5.59 
  -1   4  -5  279.46    5.35 
  -1  -4  -5  269.08    5.56 
  -1  -4  -5  271.10    5.63 
   1  -4   5  260.00    5.33 
   1  -4   5  271.94    5.81 
  -1   4  -6   35.89    1.01 
   1   4   6   36.49    1.16 
  -1   4  -6   35.83    1.53 
   1   4   6   36.06    1.19 
   1   4   6   37.65    1.21 
   1  -4   6   35.99    1.39 
  -1  -4  -6   37.36    1.33 
  -1   4  -7    0.58    0.38 
   1   4   7    0.48    0.29 
  -1   4  -7    1.06    0.24 
   1   4   7    0.74    0.30 
   1   4   7    0.71    0.28 
  -1  -4  -7    1.11    0.41 
   1  -4   7    1.97    0.49 
   1  -4   7    1.48    0.26 
  -1   4  -8   16.17    1.15 
  -1   4  -8   16.49    0.63 
   1   4   8   15.61    0.80 
   1   4   8   15.42    0.81 
   1   4   8   14.73    0.82 
   1  -4   8   17.62    1.05 
  -1  -4  -8   15.25    0.99 
   1  -4   8   15.24    0.61 
   1   4   9    4.77    0.56 
  -1   4  -9    5.50    0.96 
  -1   4  -9    4.88    0.41 
   1  -4   9    5.47    0.40 
  -1  -4  -9    4.84    0.81 
   1   4  10   36.76    1.56 
  -1   4 -10   39.88    1.15 
   1   4  10   40.47    1.43 
  -1   4 -10   39.87    2.03 
   1   4  10   40.63    1.55 
  -1  -4 -10   40.31    1.82 
   1  -4  10   39.46    1.12 
   1   4  11    7.96    0.68 
   1   4  11    8.10    0.70 
  -1   4 -11    8.30    0.51 
  -1   4 -11    9.38    1.13 
  -1  -4 -11    7.85    0.95 
   1  -4  11    7.61    0.48 
  -1   4 -12    9.05    1.45 
  -1   4 -12    7.77    0.51 
   1   4  12    8.81    0.83 
   1   4  12    8.25    0.71 
   1  -4  12    7.24    0.50 
  -1  -4 -12    8.41    1.24 
   1   4  13   14.01    0.90 
  -1   4 -13   14.61    1.47 
  -1   4 -13   13.41    0.65 
  -1  -4 -13   14.72    1.33 
  -1   4 -14    1.90    0.90 
   1   4  14    2.14    0.55 
  -1   4 -15   18.30    1.78 
   1   4  15   18.24    1.06 
   1   4  16    1.88    0.92 
   1   4  16    1.82    0.59 
  -1   4 -16    2.21    1.33 
   1   4  17    1.93    0.98 
   1   4  17    3.48    0.68 
   1   4  18    0.18    0.92 
  -1   5  19    3.28    1.19 
  -1   5  18   17.90    2.25 
  -1   5  18   16.14    1.19 
  -1   5  17    6.53    1.29 
  -1   5  17    5.81    0.89 
   1   5 -17    6.39    1.06 
  -1  -5  17    3.99    1.21 
  -1   5  16   22.42    1.79 
   1   5 -16   23.58    1.06 
  -1   5  16   19.86    1.27 
  -1  -5  16   23.00    2.02 
  -1   5  15    0.93    0.65 
  -1   5  15    0.52    0.51 
   1   5 -15    0.15    0.39 
  -1   5  14    0.85    0.51 
  -1   5  14    0.80    0.70 
   1   5 -14    0.73    0.38 
  -1  -5  14    0.78    0.39 
  -1   5  13    1.48    0.53 
   1   5 -13    2.29    0.47 
  -1   5  13    1.28    0.68 
  -1  -5  13    2.93    0.57 
   1   5 -12    9.78    1.21 
  -1   5  12    9.81    1.04 
   1   5 -12   10.47    0.78 
  -1   5  12    9.57    0.83 
  -1  -5  12   10.49    0.68 
   1   5 -11   11.11    1.21 
  -1   5  11   11.12    0.87 
   1   5 -11   11.65    0.72 
  -1   5  11   11.90    1.05 
  -1   5  11   13.31    0.90 
  -1  -5  11   12.04    0.69 
   1   5 -10   -0.29    0.40 
  -1   5  10    0.18    0.37 
  -1   5  10    0.70    0.49 
  -1   5  10    0.37    0.39 
   1   5 -10   -0.13    0.25 
  -1  -5  10   -0.21    0.25 
   1   5  -9   33.15    1.73 
   1   5  -9   34.43    1.16 
  -1   5   9   32.53    1.46 
  -1   5   9   33.26    1.30 
  -1   5   9   31.76    1.29 
  -1   5   9   33.42    1.33 
  -1  -5   9   31.98    1.10 
  -1   5   8   39.94    1.39 
  -1   5   8   39.57    1.52 
   1   5  -8   44.32    1.91 
   1   5  -8   42.08    1.30 
  -1   5   8   40.54    1.44 
  -1   5   8   41.25    1.46 
  -1  -5   8   39.82    1.68 
  -1  -5   8   41.21    1.26 
  -1   5   7    0.38    0.24 
  -1   5   7    0.43    0.30 
   1   5  -7    0.42    0.26 
  -1   5   7    0.65    0.31 
  -1   5   7    0.29    0.32 
   1   5  -7   -0.07    0.33 
  -1  -5   7    0.44    0.23 
  -1  -5   7    0.23    0.34 
  -1   5   6    0.10    0.28 
   1   5  -6    0.43    0.38 
  -1   5   6    0.17    0.27 
   1   5  -6    0.21    0.24 
  -1   5   6    0.04    0.23 
  -1   5   6    0.22    0.26 
  -1  -5   6   -0.10    0.19 
  -1  -5   6    0.07    0.31 
  -1   5   5    0.10    0.27 
  -1   5   5    0.19    0.19 
   1   5  -5    0.25    0.35 
  -1   5   5    0.14    0.23 
   1   5  -5    0.65    0.27 
  -1   5   5    0.57    0.23 
  -1  -5   5    0.34    0.23 
  -1  -5   5   -0.19    0.22 
   1   5  -4   35.69    1.34 
   1   5  -4   36.56    1.11 
  -1   5   4   35.39    1.20 
  -1  -5   4   34.36    1.08 
   1  -5  -4   35.82    1.19 
   1   5  -3   59.15    1.51 
  -1   5   3   54.77    1.58 
  -1  -5   3   56.56    1.64 
  -1  -5   3   56.10    1.49 
   1  -5  -3   57.46    1.58 
  -1   5   2  340.11    6.78 
   1   5  -2  351.22    6.72 
  -1  -5   2  341.69    6.70 
  -1  -5   2  332.39    6.72 
   1  -5  -2  334.52    6.76 
  -1  -5   2  335.59    6.69 
  -1   5   1   42.86    1.24 
   1   5  -1   43.21    1.22 
  -1  -5   1   40.88    1.20 
  -1  -5   1   42.14    1.09 
  -1  -5   1   39.14    1.07 
   1  -5  -1   41.09    1.22 
  -1   5   0   20.32    0.77 
   1   5   0   20.21    0.78 
   1  -5   0   19.54    0.76 
  -1  -5   0   19.38    0.77 
   1   5   1   25.33    0.91 
  -1   5  -1   23.45    0.83 
  -1   5  -1   26.10    0.86 
   1  -5   1   24.17    0.85 
   1  -5   1   24.91    0.74 
  -1  -5  -1   24.67    0.89 
   1   5   2   29.23    1.01 
  -1   5  -2   30.17    0.93 
  -1   5  -2   26.77    1.01 
  -1  -5  -2   27.29    0.99 
   1  -5   2   28.69    0.92 
   1  -5   2   28.40    0.93 
  -1   5  -3   98.85    2.21 
  -1   5  -3   97.12    2.50 
   1   5   3   97.46    2.36 
   1  -5   3   99.42    2.22 
  -1  -5  -3   94.65    2.33 
   1   5   4   10.66    0.63 
  -1   5  -4    9.36    0.71 
  -1   5  -4   11.17    0.53 
   1   5   4   10.96    0.43 
  -1  -5  -4    9.45    0.59 
   1  -5   4   11.09    0.53 
  -1  -5  -4   10.74    0.54 
   1  -5   4   10.92    0.66 
  -1   5  -5   -0.12    0.27 
   1   5   5   -0.02    0.23 
   1   5   5    0.04    0.17 
  -1   5  -5    0.09    0.19 
   1  -5   5   -0.04    0.20 
  -1  -5  -5    0.00    0.22 
   1  -5   5    0.10    0.18 
  -1  -5  -5    0.12    0.21 
   1   5   6    3.51    0.46 
   1   5   6    3.35    0.34 
  -1   5  -6    2.88    0.33 
  -1  -5  -6    3.22    0.47 
   1  -5   6    3.77    0.34 
   1  -5   6    3.24    0.53 
   1   5   7   -0.07    0.19 
  -1   5  -7   -0.26    0.36 
  -1   5  -7   -0.09    0.19 
   1   5   7   -0.45    0.24 
   1  -5   7    0.16    0.27 
  -1  -5  -7    0.03    0.29 
   1  -5   7    0.12    0.19 
   1   5   8   32.55    1.19 
  -1   5  -8   32.18    1.02 
  -1   5  -8   31.84    1.67 
   1   5   8   33.45    1.26 
   1  -5   8   32.36    0.99 
  -1  -5  -8   32.44    1.41 
  -1   5  -9   28.07    0.93 
  -1   5  -9   27.86    1.63 
   1   5   9   26.39    1.13 
   1   5   9   26.36    1.14 
   1   5   9   27.22    1.17 
   1  -5   9   26.08    0.89 
  -1  -5  -9   27.83    1.60 
  -1   5 -10    0.43    0.56 
   1   5  10    0.33    0.30 
   1   5  10    0.61    0.38 
  -1   5 -10    0.58    0.29 
   1   5  10    0.60    0.37 
  -1  -5 -10    0.26    0.41 
   1  -5  10    0.84    0.28 
   1   5  11    3.22    0.58 
  -1   5 -11    4.40    0.44 
  -1   5 -11    4.13    0.96 
  -1  -5 -11    3.98    0.84 
   1  -5  11    3.58    0.41 
  -1   5 -12    4.29    0.48 
   1   5  12    3.34    0.63 
  -1   5 -12    3.70    0.98 
   1  -5  12    3.59    0.41 
  -1  -5 -12    2.53    0.73 
   1   5  13    9.77    0.83 
  -1   5 -13   11.64    1.65 
   1   5  14   25.96    1.27 
  -1   5 -14   23.81    1.92 
  -1   5 -15   -0.24    0.63 
   1   5  15   -0.10    0.58 
   1   5  15    1.20    0.55 
   1   5  16    0.70    0.50 
  -1   5 -16   -0.70    0.58 
   1   5  16   -0.53    0.68 
   1   5  17    8.14    0.94 
   1   5  17    7.80    1.42 
   1   5  18    0.36    0.97 
  -1   6  19    4.67    1.34 
  -1   6  18    6.56    1.32 
  -1   6  18    6.61    0.95 
  -1   6  17    3.95    0.78 
  -1   6  17    3.27    0.96 
  -1  -6  17    1.69    1.06 
  -1   6  16    3.64    0.94 
  -1   6  16    1.62    0.62 
   1   6 -16    1.41    0.53 
   1   6 -15    4.94    0.66 
  -1   6  15    4.55    0.79 
  -1   6  15    5.14    1.18 
  -1  -6  15    5.09    1.18 
  -1   6  14    2.30    0.64 
   1   6 -14    3.60    0.60 
  -1   6  14    2.71    0.80 
  -1   6  13    0.16    0.42 
  -1   6  13    0.25    0.51 
   1   6 -13    0.44    0.38 
  -1  -6  13    0.26    0.35 
   1   6 -12    4.41    0.59 
  -1   6  12    3.19    0.65 
  -1   6  12    5.42    0.87 
  -1  -6  12    4.20    0.56 
   1   6 -11    4.50    0.58 
  -1   6  11    4.10    0.65 
  -1   6  11    5.37    0.82 
  -1   6  11    4.79    0.65 
   1   6 -11    5.76    1.00 
  -1   6  10   16.76    0.91 
  -1   6  10   14.24    0.96 
   1   6 -10   15.79    1.32 
  -1  -6  10   15.15    0.79 
   1   6  -9    0.92    0.53 
  -1   6   9    0.88    0.32 
  -1   6   9    0.71    0.37 
   1   6  -9    0.47    0.33 
  -1   6   9    0.65    0.42 
  -1  -6   9    0.58    0.31 
  -1   6   8   42.89    1.39 
  -1   6   8   41.89    1.55 
  -1   6   8   43.40    1.55 
   1   6  -8   43.81    1.40 
  -1   6   8   43.58    1.53 
   1   6  -8   43.46    1.94 
  -1  -6   8   47.77    1.84 
  -1  -6   8   42.57    1.34 
  -1   6   7   22.78    0.95 
   1   6  -7   24.05    1.33 
  -1   6   7   21.98    1.03 
  -1   6   7   22.36    0.87 
  -1   6   7   22.37    1.06 
   1   6  -7   22.00    0.92 
  -1  -6   7   22.56    0.89 
  -1  -6   7   22.80    1.21 
  -1   6   6  126.05    2.84 
  -1   6   6  129.13    3.14 
   1   6  -6  128.18    3.48 
  -1   6   6  123.77    3.36 
  -1   6   6  126.74    2.76 
   1   6  -6  129.21    2.95 
  -1  -6   6  126.39    2.90 
  -1  -6   6  128.10    3.31 
  -1   6   5   10.05    0.79 
   1   6  -5    9.15    0.75 
   1   6  -5    8.50    0.57 
  -1  -6   5    9.94    0.56 
  -1   6   4   25.04    1.02 
   1   6  -4   26.43    0.95 
  -1  -6   4   24.91    1.04 
   1  -6  -4   24.36    1.00 
  -1  -6   4   24.00    0.91 
  -1   6   3   23.29    0.97 
   1   6  -3   24.05    0.92 
   1  -6  -3   24.21    0.97 
  -1  -6   3   25.13    0.96 
  -1  -6   3   24.16    0.91 
   1   6  -2  196.04    4.06 
  -1   6   2  189.38    4.10 
   1  -6  -2  192.08    4.12 
  -1  -6   2  181.07    3.97 
  -1  -6   2  186.52    3.95 
  -1  -6   2  186.52    4.03 
   1   6  -1   62.63    1.67 
  -1   6   1   60.84    1.67 
   1  -6  -1   59.32    1.66 
  -1  -6   1   59.57    1.44 
  -1  -6   1   59.88    1.44 
  -1  -6   1   59.43    1.65 
   1   6   0  215.60    4.47 
  -1   6   0  212.58    4.44 
  -1  -6   0  202.66    4.44 
   1  -6   0  209.41    4.44 
  -1   6  -1   73.66    1.88 
  -1   6  -1   81.20    1.98 
   1   6   1   77.51    2.01 
  -1  -6  -1   77.17    2.02 
   1  -6   1   78.68    1.76 
   1  -6   1   79.91    1.98 
   1   6   2    7.75    0.56 
  -1   6  -2    7.72    0.50 
  -1   6  -2    7.93    0.57 
   1  -6   2    7.20    0.50 
   1  -6   2    8.08    0.56 
  -1  -6  -2    7.69    0.56 
  -1   6  -3   11.44    0.59 
   1   6   3   11.49    0.67 
  -1   6  -3   11.53    0.73 
   1  -6   3   10.12    0.57 
  -1  -6  -3   11.96    0.67 
   1  -6   3   11.73    0.62 
  -1   6  -4    7.08    0.65 
   1   6   4    6.54    0.55 
  -1   6  -4    7.05    0.47 
  -1  -6  -4    6.94    0.54 
   1  -6   4    6.38    0.46 
   1   6   5   11.10    0.46 
   1   6   5   10.91    0.82 
  -1   6  -5   10.75    0.83 
  -1   6  -5   10.73    0.57 
  -1  -6  -5   10.66    0.67 
   1  -6   5   10.20    0.56 
  -1  -6  -5   10.18    0.56 
   1  -6   5   10.92    0.71 
   1   6   6    7.66    0.62 
  -1   6  -6    6.88    0.49 
   1   6   6    6.88    0.43 
  -1   6  -6    7.13    0.78 
   1  -6   6    7.04    0.48 
  -1  -6  -6    6.37    0.54 
   1  -6   6    6.68    0.73 
  -1   6  -7   67.51    1.73 
  -1   6  -7   65.62    2.40 
   1   6   7   65.50    1.72 
   1   6   7   64.27    1.94 
   1   6   7   63.79    1.95 
  -1  -6  -7   65.93    1.96 
   1  -6   7   66.54    2.14 
   1  -6   7   65.32    1.70 
  -1   6  -8    9.60    0.98 
  -1   6  -8    8.08    0.56 
   1   6   8    8.05    0.70 
   1   6   8    7.80    0.56 
   1   6   8    8.21    0.69 
  -1  -6  -8    7.65    0.73 
   1  -6   8    7.97    0.53 
  -1   6  -9    0.85    0.60 
  -1   6  -9    0.33    0.28 
   1   6   9    0.96    0.43 
   1   6   9    1.20    0.33 
   1  -6   9    1.01    0.30 
  -1  -6  -9    0.39    0.39 
   1   6  10    0.06    0.36 
  -1   6 -10    0.63    0.29 
  -1   6 -10    0.26    0.54 
   1   6  10    0.96    0.32 
   1  -6  10    0.66    0.28 
  -1  -6 -10    0.03    0.41 
  -1   6 -11    5.94    1.13 
  -1   6 -11    5.20    0.49 
   1   6  11    6.18    0.69 
   1  -6  11    5.42    0.48 
   1   6  12   20.35    1.13 
  -1   6 -12   19.08    1.63 
  -1   6 -12   19.31    0.82 
   1  -6  12   20.03    0.81 
  -1   6 -13    6.73    0.53 
  -1   6 -13   11.18    1.68 
   1   6  13    7.90    0.81 
   1  -6  13    7.54    0.54 
   1   6  14    6.05    0.85 
   1   6  14    6.19    1.09 
  -1   6 -14    6.79    1.26 
  -1   6 -15    0.61    0.72 
   1   6  15    1.24    0.83 
   1   6  16    8.51    0.94 
   1   6  16   11.56    1.53 
   1   6  17    1.22    0.97 
   1   6  17    2.81    0.71 
   1   6  18    1.85    1.08 
  -1   7  19    0.35    1.18 
  -1   7  18    3.56    0.82 
  -1   7  18    0.59    0.92 
  -1   7  17   14.88    1.23 
  -1   7  17   15.21    1.53 
  -1   7  16    0.24    0.54 
  -1   7  16    1.08    0.76 
   1   7 -16    0.92    0.61 
  -1  -7  16    0.51    0.86 
  -1   7  15   14.37    1.13 
  -1   7  15   14.19    1.74 
   1   7 -15   14.08    0.89 
  -1  -7  15   13.10    1.63 
  -1   7  14   10.36    0.99 
  -1   7  14   11.80    1.18 
   1   7 -14   11.08    0.80 
  -1  -7  14   12.62    1.52 
  -1   7  13   16.91    1.26 
   1   7 -13   16.38    0.92 
  -1   7  13   16.12    1.33 
  -1  -7  13   16.95    0.92 
  -1   7  12   13.64    1.07 
   1   7 -12   12.89    0.83 
  -1   7  12   13.15    1.00 
  -1  -7  12   13.27    0.79 
   1   7 -11    0.35    0.36 
  -1   7  11    0.88    0.35 
  -1   7  11    0.34    0.42 
  -1   7  11    0.55    0.50 
  -1  -7  11    0.42    0.33 
  -1   7  10    1.63    0.39 
   1   7 -10    1.40    0.66 
  -1   7  10    1.76    0.51 
   1   7 -10    1.34    0.42 
  -1   7  10    1.99    0.53 
  -1  -7  10    2.44    0.44 
   1   7  -9    4.92    0.62 
   1   7  -9    4.07    0.87 
  -1   7   9    5.29    0.52 
  -1   7   9    4.94    0.73 
  -1   7   9    5.46    0.67 
  -1   7   8   71.45    2.24 
  -1   7   8   73.99    1.89 
   1   7  -8   76.73    2.09 
   1   7  -8   72.86    2.65 
  -1   7   8   70.71    1.99 
  -1  -7   8   71.11    1.99 
  -1   7   7   15.01    0.80 
  -1   7   7   15.08    0.92 
  -1   7   7   14.07    0.68 
   1   7  -7   15.38    1.11 
  -1  -7   7   12.82    0.94 
  -1  -7   7   14.74    0.76 
   1   7  -6    0.42    0.33 
  -1   7   6    0.23    0.31 
  -1   7   6    0.39    0.30 
  -1  -7   6    0.26    0.26 
  -1  -7   6    0.24    0.34 
   1   7  -5   46.38    1.42 
  -1   7   5   44.19    1.53 
   1  -7  -5   45.19    1.52 
  -1  -7   5   36.83    1.45 
  -1  -7   5   43.99    1.37 
  -1   7   4   13.79    0.80 
   1   7  -4   15.03    0.75 
  -1  -7   4   14.06    0.72 
  -1  -7   4   12.84    0.76 
   1  -7  -4   14.30    0.79 
  -1   7   3    6.09    0.55 
   1   7  -3    5.83    0.50 
  -1  -7   3    6.49    0.51 
  -1  -7   3    5.44    0.48 
   1  -7  -3    7.18    0.66 
  -1  -7   3    6.44    0.55 
   1   7  -2   82.76    2.12 
   1  -7  -2   79.03    2.15 
  -1  -7   2   79.92    1.99 
  -1  -7   2   78.99    1.93 
  -1  -7   2   80.75    2.11 
  -1   7   1    5.81    0.52 
   1   7  -1    5.44    0.50 
  -1  -7   1    7.26    0.54 
   1  -7  -1    7.14    0.55 
   1   7   0   35.71    1.27 
  -1   7   0   37.27    1.25 
  -1  -7   0   38.12    1.28 
   1  -7   0   37.22    1.26 
  -1   7  -1   32.59    1.07 
  -1   7  -1   35.11    1.17 
  -1  -7  -1   33.83    1.21 
   1  -7   1   33.53    0.93 
   1  -7   1   34.34    1.18 
  -1   7  -2   21.12    0.87 
  -1   7  -2   21.29    0.93 
   1   7   2   22.27    1.00 
   1  -7   2   22.56    0.79 
   1  -7   2   22.12    0.90 
  -1  -7  -2   21.24    0.95 
  -1   7  -3   45.65    1.37 
  -1   7  -3   43.65    1.53 
   1   7   3   44.83    1.49 
   1  -7   3   44.18    1.37 
   1  -7   3   45.88    1.35 
   1   7   4    0.99    0.31 
  -1   7  -4    0.62    0.28 
  -1   7  -4    0.51    0.36 
  -1  -7  -4    0.35    0.28 
   1  -7   4    0.65    0.27 
   1  -7   4    0.44    0.23 
  -1   7  -5   15.91    1.04 
  -1   7  -5   17.69    0.78 
   1   7   5   17.17    0.91 
   1  -7   5   17.09    0.78 
  -1  -7  -5   17.49    0.91 
   1   7   6   20.58    1.04 
  -1   7  -6   19.87    1.23 
  -1   7  -6   21.62    0.89 
  -1  -7  -6   20.05    1.01 
   1  -7   6   22.71    0.90 
   1  -7   6   22.40    1.11 
  -1   7  -7   12.87    1.09 
   1   7   7   14.64    0.90 
  -1   7  -7   13.66    0.72 
   1   7   7   13.62    0.61 
   1  -7   7   14.75    0.73 
   1  -7   7   13.10    0.90 
   1   7   8    3.02    0.59 
  -1   7  -8    3.98    0.86 
   1   7   8    3.04    0.40 
  -1   7  -8    3.58    0.50 
   1  -7   8    3.83    0.49 
   1   7   9   76.37    2.05 
   1   7   9   73.81    2.31 
  -1   7  -9   77.36    2.93 
  -1   7  -9   76.33    2.01 
   1  -7   9   75.69    1.98 
   1   7  10    2.82    0.57 
  -1   7 -10    2.29    0.78 
  -1   7 -10    2.62    0.44 
   1  -7  10    3.22    0.45 
   1   7  11    0.42    0.45 
  -1   7 -11    0.68    0.32 
   1   7  11    0.45    0.43 
   1   7  11    0.65    0.32 
  -1   7 -11    0.45    0.49 
   1  -7  11    0.63    0.31 
  -1   7 -12    8.67    0.64 
   1   7  12   11.15    0.92 
   1   7  12    8.68    1.02 
  -1   7 -12   12.85    1.62 
   1  -7  12   11.02    0.64 
  -1   7 -13    1.48    0.74 
   1   7  13    1.61    0.57 
   1   7  13    2.52    0.76 
   1   7  14    7.14    0.95 
   1   7  14    8.01    1.20 
  -1   7 -14    9.91    1.60 
   1   7  15    0.96    0.57 
  -1   7 -15    0.73    0.98 
   1   7  15    1.70    0.79 
   1   7  16    1.41    0.81 
   1   7  16    1.97    0.60 
   1   7  17    2.04    0.71 
   1   7  17    1.98    1.04 
   1   7  18   -0.51    0.98 
  -1   8  18    0.44    0.71 
  -1   8  17    3.18    0.95 
  -1   8  17    2.30    0.73 
  -1   8  16    8.06    1.20 
  -1   8  16    9.50    1.03 
  -1  -8  16    7.73    1.55 
  -1   8  15    3.91    0.80 
  -1   8  15    4.75    0.91 
   1   8 -15    2.59    0.67 
  -1  -8  15    2.82    1.35 
  -1   8  14    1.21    0.62 
   1   8 -14    1.45    0.54 
  -1   8  14    0.16    0.48 
  -1  -8  14    1.46    0.82 
  -1   8  13    4.41    0.77 
   1   8 -13    5.07    0.71 
  -1   8  13    3.45    0.71 
  -1  -8  13    3.30    0.97 
  -1   8  12   39.84    2.10 
   1   8 -12   35.23    1.41 
  -1   8  12   39.55    1.46 
  -1   8  12   38.58    1.66 
  -1   8  11   -0.58    0.48 
   1   8 -11    0.19    0.38 
  -1   8  11    0.98    0.35 
  -1   8  11    0.75    0.48 
   1   8 -10    1.21    0.43 
  -1   8  10    0.54    0.41 
  -1   8  10    1.19    0.31 
  -1   8  10    0.93    0.42 
  -1  -8  10    1.37    0.41 
  -1   8   9   -0.11    0.27 
  -1   8   9    0.11    0.24 
  -1   8   9   -0.05    0.35 
   1   8  -9    0.00    0.32 
  -1  -8   9    0.02    0.32 
   1   8  -8   12.92    0.82 
  -1   8   8   13.76    0.96 
  -1  -8   8   12.77    0.78 
   1   8  -7    1.10    0.40 
  -1   8   7    0.66    0.39 
  -1  -8   7    0.79    0.39 
  -1  -8   7    0.88    0.36 
  -1   8   6   21.39    1.11 
   1   8  -6   21.51    1.00 
  -1  -8   6   20.82    0.96 
   1   8  -5    0.62    0.35 
  -1   8   5    0.49    0.32 
  -1  -8   5    0.33    0.32 
  -1  -8   5    0.92    0.36 
  -1  -8   5    0.46    0.39 
   1   8  -4    1.69    0.41 
  -1   8   4    1.28    0.38 
  -1  -8   4    1.44    0.42 
  -1  -8   4    1.18    0.33 
   1  -8  -4    1.47    0.38 
  -1  -8   4    1.63    0.37 
   1   8  -3    4.16    0.54 
  -1   8   3    4.50    0.53 
  -1  -8   3    5.09    0.53 
   1  -8  -3    4.45    0.52 
  -1  -8   3    3.81    0.42 
  -1  -8   3    4.57    0.50 
  -1   8   2   14.11    0.81 
   1   8  -2   15.60    0.82 
   1  -8  -2   15.13    0.84 
  -1  -8   2   15.13    0.65 
  -1  -8   2   14.53    0.69 
  -1  -8   2   16.43    0.84 
   1   8  -1    4.85    0.63 
  -1   8   1    4.29    0.57 
   1  -8  -1    4.51    0.51 
  -1  -8   1    4.75    0.51 
  -1   8   0    9.53    0.66 
   1   8   0   11.04    0.71 
   1  -8   0    9.82    0.80 
  -1  -8   0   10.19    0.69 
  -1   8  -1   56.14    1.55 
  -1   8  -1   56.66    1.68 
   1   8   1   55.99    1.75 
  -1  -8  -1   55.40    1.74 
   1  -8   1   57.37    2.29 
   1   8   2    3.91    0.52 
  -1   8  -2    5.09    0.62 
  -1   8  -2    4.25    0.49 
  -1  -8  -2    4.75    0.58 
   1  -8   2    4.29    0.37 
   1  -8   2    4.47    0.49 
  -1   8  -3   15.84    0.90 
  -1   8  -3   15.06    0.91 
   1   8   3   14.75    0.86 
   1  -8   3   15.02    0.79 
   1  -8   3   15.20    0.72 
  -1  -8  -3   14.28    0.83 
  -1   8  -4    7.62    0.74 
   1   8   4    8.45    0.70 
  -1  -8  -4    9.50    0.85 
   1  -8   4    7.27    0.59 
   1  -8   4    8.74    0.62 
   1   8   5   10.63    0.79 
   1  -8   5   11.50    0.74 
   1  -8   5   10.42    0.68 
  -1   8  -6   32.78    1.62 
   1   8   6   31.73    1.37 
   1  -8   6   32.65    1.19 
   1   8   7    3.33    0.60 
  -1   8  -7    4.42    0.87 
   1  -8   7    4.27    0.53 
   1   8   8  121.22    2.98 
  -1   8  -8  123.13    3.20 
  -1   8  -8  123.32    3.82 
   1   8   8  118.60    2.71 
   1   8   8  120.41    3.26 
   1  -8   8  119.04    2.91 
  -1   8  -9   24.58    1.65 
  -1   8  -9   26.52    1.10 
   1   8   9   27.13    1.34 
   1   8   9   26.10    0.98 
   1   8   9   28.45    1.25 
   1  -8   9   26.08    1.09 
   1   8  10    1.11    0.49 
   1   8  10    1.14    0.50 
  -1   8 -10    0.54    0.35 
   1   8  10    0.78    0.30 
  -1   8 -10    1.56    0.64 
   1  -8  10    0.91    0.43 
   1   8  11   11.08    0.95 
  -1   8 -11   11.14    0.73 
   1   8  11   11.66    1.00 
  -1   8 -11   13.22    1.70 
   1   8  11   11.68    0.74 
   1   8  12    0.10    0.50 
  -1   8 -12    1.09    0.40 
  -1   8 -12    0.51    0.61 
   1   8  13    8.56    1.17 
  -1   8 -13    8.50    0.77 
   1   8  13    5.88    0.84 
  -1   8 -13    9.16    1.44 
   1   8  14    0.59    0.53 
  -1   8 -14    0.29    0.66 
   1   8  14   -0.54    0.60 
   1   8  15    1.57    0.77 
   1   8  15    1.73    0.63 
   1   8  16    6.99    1.21 
   1   8  16    4.91    0.91 
   1   8  17   -1.03    0.99 
   1   8  17    3.43    0.78 
  -1   9  17    0.99    0.71 
  -1   9  16    1.72    0.72 
  -1   9  16   -0.59    0.60 
  -1   9  15    1.08    0.60 
  -1   9  15    1.03    0.63 
   1   9 -15    0.54    0.66 
  -1  -9  15   -0.32    0.95 
   1   9 -14   14.24    0.99 
  -1   9  14   15.39    1.20 
  -1   9  14   14.00    1.12 
  -1  -9  14   15.65    1.71 
   1   9 -13   10.64    0.85 
  -1   9  13   10.57    1.03 
  -1   9  13   10.02    0.88 
  -1  -9  13    9.78    1.59 
   1   9 -12    4.35    0.65 
  -1   9  12    5.60    0.72 
  -1   9  12    5.33    0.57 
  -1   9  12    4.22    0.79 
  -1  -9  12    3.97    1.04 
  -1   9  11    1.19    0.31 
  -1   9  11    0.58    0.48 
  -1   9  11    0.92    0.44 
   1   9 -11    0.25    0.38 
  -1  -9  11    0.84    0.68 
   1   9 -10   56.48    1.88 
  -1   9  10   60.36    2.74 
  -1  -9  10   59.92    2.66 
   1   9  -9    0.37    0.38 
  -1   9   9    0.12    0.40 
  -1  -9   9    0.70    0.53 
  -1   9   8   20.51    1.21 
   1   9  -8   21.69    1.08 
  -1  -9   8   21.96    1.45 
  -1   9   7   73.30    2.39 
   1   9  -7   75.16    2.21 
  -1  -9   7   76.30    2.65 
  -1   9   6    2.73    0.58 
   1   9  -6    5.52    0.68 
  -1  -9   6    5.03    0.61 
  -1  -9   6    3.66    0.68 
  -1  -9   6    7.47    1.13 
   1   9  -5    0.06    0.30 
  -1   9   5    0.36    0.37 
  -1  -9   5    0.16    0.38 
  -1  -9   5    0.19    0.30 
  -1  -9   5    0.46    0.36 
   1   9  -4   43.99    1.53 
  -1   9   4   44.62    1.66 
  -1  -9   4   43.95    1.58 
  -1  -9   4   44.69    1.59 
  -1  -9   4   44.36    1.45 
  -1   9   3   23.61    1.14 
   1   9  -3   22.58    1.07 
  -1  -9   3   22.72    1.08 
  -1  -9   3   25.29    1.02 
  -1  -9   3   23.84    0.91 
  -1   9   2   34.93    1.38 
   1   9  -2   34.87    1.34 
  -1  -9   2   33.47    1.08 
  -1  -9   2   33.85    1.21 
  -1  -9   2   35.72    1.39 
  -1   9   1    4.00    0.57 
   1   9  -1    3.93    0.60 
  -1  -9   1    4.92    0.74 
   1  -9  -1    5.26    1.05 
   1   9   0    5.28    0.59 
  -1   9   0    5.33    0.58 
   1  -9   0    6.10    0.60 
  -1   9  -1    1.29    0.43 
   1   9   1    1.26    0.40 
   1  -9   1    1.04    0.38 
   1   9   2   22.34    1.11 
  -1   9  -2   21.91    1.02 
  -1   9  -2   22.14    0.99 
   1  -9   2   22.68    1.05 
   1  -9   2   23.10    0.81 
  -1   9  -3    0.67    0.35 
   1   9   3    1.35    0.41 
  -1   9  -3    1.39    0.43 
   1  -9   3    1.07    0.37 
   1  -9   3    0.74    0.27 
   1   9   4    1.03    0.41 
  -1   9  -4    0.82    0.42 
  -1   9  -4    1.19    0.40 
   1  -9   4    0.70    0.30 
   1  -9   4    1.52    0.43 
  -1   9  -5    1.16    0.41 
  -1   9  -5    0.79    0.46 
   1   9   5    0.98    0.43 
   1  -9   5    1.16    0.41 
   1  -9   5    0.72    0.39 
   1   9   6   90.24    2.64 
  -1   9  -6   92.79    2.40 
  -1   9  -6   90.31    2.91 
   1  -9   6   75.33    2.41 
   1  -9   6   86.89    2.36 
  -1   9  -7   42.52    1.46 
  -1   9  -7   40.47    1.94 
   1   9   7   38.37    1.63 
   1  -9   7   41.93    1.46 
  -1   9  -8    4.17    0.89 
   1   9   8    5.25    0.73 
  -1   9  -8    4.86    0.62 
   1  -9   8    5.00    0.56 
  -1   9  -9    8.66    1.26 
  -1   9  -9    7.70    0.67 
   1   9   9    6.96    0.82 
   1  -9   9    8.92    0.67 
   1   9  10   43.12    2.60 
  -1   9 -10   44.76    1.51 
   1   9  10   42.16    1.56 
   1   9  10   43.16    1.33 
   1  -9  10   42.65    1.47 
   1   9  11   10.27    0.96 
   1   9  11    9.83    1.47 
   1   9  11   11.46    0.86 
  -1   9 -11   10.54    1.31 
  -1   9 -11   10.88    0.75 
   1  -9  11   10.53    0.76 
  -1   9 -12   -0.28    0.41 
   1   9  12    0.67    0.54 
  -1   9 -12    0.58    0.70 
   1   9  12    0.96    0.52 
   1   9  13    1.84    0.63 
  -1   9 -13    0.83    0.46 
   1   9  13    2.03    0.61 
   1   9  14    1.39    0.59 
   1   9  14    0.88    0.71 
   1   9  15    0.51    0.85 
   1   9  15    0.18    0.56 
   1   9  16    2.10    0.73 
   1   9  17    2.38    0.80 
  -1  10  16    0.88    0.67 
  -1  10  15    2.50    1.24 
   1  10 -15    2.54    0.88 
  -1 -10  15    3.18    1.19 
  -1  10  14    9.35    1.04 
   1  10 -14    8.53    0.99 
  -1  10  14   10.47    0.91 
  -1 -10  14   10.23    1.62 
  -1  10  13    2.65    0.73 
   1  10 -13    1.17    0.54 
  -1 -10  13    2.62    0.91 
   1  10 -12    4.09    0.72 
  -1  10  12    4.23    0.85 
  -1 -10  12    5.69    1.13 
   1  10 -11   26.11    1.27 
  -1  10  11   25.47    1.48 
  -1 -10  11   25.26    1.84 
  -1  10  10   -0.20    0.41 
   1  10 -10    0.38    0.39 
  -1 -10  10    0.39    0.66 
   1  10  -9   12.88    0.92 
  -1  10   9   14.53    1.11 
  -1 -10   9   14.79    1.32 
  -1  10   8    0.28    0.54 
   1  10  -8    1.23    0.46 
  -1 -10   8    0.54    0.55 
  -1  10   7    4.09    0.74 
   1  10  -7    4.90    0.72 
  -1 -10   7    3.60    0.76 
   1  10  -6    3.31    0.58 
  -1  10   6    2.92    0.64 
  -1 -10   6    2.69    0.65 
  -1 -10   6    3.53    0.60 
   1  10  -5    5.89    0.67 
  -1  10   5    5.11    0.77 
  -1 -10   5    7.80    0.65 
  -1  10   4   17.43    1.06 
   1  10  -4   15.59    0.94 
  -1 -10   4   16.34    0.94 
  -1 -10   4   16.95    0.84 
   1  10  -3   88.23    2.50 
  -1  10   3   87.20    2.58 
  -1 -10   3   88.02    2.14 
  -1 -10   3   83.40    2.23 
   1  10  -2   82.63    2.42 
  -1  10   2   82.94    2.47 
  -1  10   1    6.08    0.67 
   1  10  -1    5.67    0.64 
  -1  10   0    0.96    0.43 
   1  10   0    0.59    0.39 
   1  10   1    1.68    0.46 
  -1  10  -1    2.20    0.50 
   1  10   2    0.69    0.41 
  -1  10  -2    0.82    0.41 
   1 -10   2    0.98    0.23 
   1  10   3   11.09    0.87 
  -1  10  -3   11.40    0.80 
   1 -10   3   10.16    0.60 
   1  10   4   13.01    0.95 
  -1  10  -4   12.68    0.94 
  -1  10  -4   11.80    0.80 
   1 -10   4   12.03    0.72 
  -1  10  -5   90.63    2.87 
  -1  10  -5   91.89    2.54 
   1  10   5   95.87    2.81 
   1 -10   5   94.25    2.55 
  -1  10  -6    0.90    0.44 
   1  10   6    0.25    0.40 
  -1  10  -6   -0.04    0.47 
   1 -10   6    0.38    0.35 
  -1  10  -7    6.47    1.00 
  -1  10  -7    5.62    0.68 
   1  10   7    4.14    0.75 
  -1  10  -8    0.20    0.52 
  -1  10  -8    1.07    0.39 
   1  10   9   14.65    1.11 
  -1  10  -9   14.08    0.89 
  -1  10  -9   15.32    1.40 
  -1  10 -10    0.36    0.40 
   1  10  10    0.21    0.46 
  -1  10 -10   -0.49    0.53 
  -1  10 -11    9.67    1.36 
  -1  10 -11    8.77    0.77 
   1  10  11    8.30    0.94 
   1  10  12    2.82    0.72 
  -1  10 -12    3.57    0.61 
   1  10  13   -0.16    0.54 
   1  10  13    0.89    0.54 
  -1  10 -13    0.98    0.53 
   1  10  14    3.55    0.78 
   1  10  16    0.42    0.72 
  -1  11  15    2.59    0.81 
  -1  11  14    0.32    0.65 
  -1 -11  14    0.96    0.97 
  -1  11  13   14.35    1.25 
   1  11 -13   15.97    1.18 
  -1 -11  13   17.55    1.76 
   1  11 -12   29.68    1.44 
  -1  11  12   31.39    1.74 
  -1 -11  12   32.26    2.16 
  -1  11  11    3.32    0.77 
   1  11 -11    1.56    0.56 
  -1 -11  11    1.78    0.78 
   1  11 -10    0.68    0.47 
  -1  11  10   -0.18    0.48 
  -1 -11  10    0.07    0.64 
  -1  11   9   20.61    1.35 
   1  11  -9   21.55    1.20 
  -1 -11   9   24.82    1.64 
  -1  11   8   10.93    1.01 
   1  11  -8   12.81    0.95 
  -1 -11   8   12.28    1.16 
  -1  11   7    8.01    0.87 
   1  11  -7    6.91    0.77 
  -1 -11   7    7.37    0.90 
   1  11  -6    0.97    0.46 
  -1  11   6    0.98    0.78 
  -1 -11   6    1.27    0.44 
  -1 -11   6    0.89    0.49 
  -1  11   5   10.44    0.92 
   1  11  -5   10.93    0.87 
  -1 -11   5   11.19    0.75 
  -1 -11   5   10.17    0.86 
  -1  11   4   16.42    1.09 
   1  11  -4   15.72    1.00 
  -1 -11   4   15.37    0.91 
  -1 -11   4   16.55    0.81 
  -1  11   3    0.72    0.43 
   1  11  -3    0.22    0.36 
  -1 -11   3    0.63    0.27 
  -1 -11   3    0.27    0.30 
  -1  11   2   21.23    1.19 
   1  11  -2   21.34    1.16 
  -1  11   1   48.02    1.79 
   1  11  -1   47.84    1.80 
  -1  11   0    0.28    0.37 
   1  11   0    0.66    0.43 
   1  11   1   -0.04    0.36 
  -1  11  -1    0.71    0.42 
  -1  11  -2    6.89    0.70 
   1  11   2    7.17    0.77 
   1  11   3   -0.43    0.34 
  -1  11  -3    0.11    0.36 
   1 -11   3    0.36    0.37 
   1 -11   3    0.86    0.25 
   1  11   4   12.45    0.97 
  -1  11  -4   12.55    0.88 
   1 -11   4   12.18    0.71 
  -1  11  -5   24.07    1.18 
   1  11   5   24.73    1.42 
   1 -11   5   25.18    1.12 
   1  11   6    7.43    0.88 
  -1  11  -6    6.39    0.69 
   1  11   7    7.29    0.86 
  -1  11  -7    8.08    0.75 
  -1  11  -8   27.12    1.27 
   1  11   8   28.06    1.52 
  -1  11  -9    1.25    0.45 
   1  11   9    1.65    0.58 
  -1  11 -10    1.28    0.48 
   1  11  10    1.59    0.59 
  -1  11 -11    8.70    0.82 
   1  11  11    9.09    1.00 
  -1  11 -12    2.25    0.62 
   1  11  12    2.36    0.74 
   1  11  13    3.31    0.78 
  -1  11 -13    3.65    0.77 
   1  11  14    6.33    1.00 
   1 -11  14    8.67    1.80 
   1  11  15    0.84    0.73 
  -1  12  14    2.45    0.74 
   1  12 -14    2.55    1.00 
  -1 -12  14    3.16    1.28 
  -1  12  13    0.43    0.59 
   1  12 -13    0.05    0.67 
  -1 -12  13    0.81    1.03 
   1  12 -12    0.70    0.61 
  -1  12  12    0.70    1.02 
  -1 -12  12    0.07    0.84 
   1  12 -11    4.09    0.77 
  -1  12  11    2.73    0.80 
  -1 -12  11    4.60    1.08 
  -1  12  10    1.84    0.73 
   1  12 -10    1.03    0.61 
  -1 -12  10    2.01    0.84 
  -1  12   9    0.13    0.49 
  -1 -12   9   -0.52    0.58 
  -1  12   8    4.46    0.76 
   1  12  -8    4.73    0.77 
  -1 -12   8    4.09    0.91 
  -1  12   7    3.82    0.75 
   1  12  -7    6.51    0.83 
  -1 -12   7    6.29    0.90 
   1  12  -6   -0.09    0.41 
  -1  12   6    0.10    0.44 
  -1 -12   6    0.77    0.44 
  -1 -12   6    0.38    0.42 
   1  12  -5    0.50    0.45 
  -1  12   5    0.19    0.42 
  -1 -12   5   -0.21    0.37 
  -1 -12   5    0.66    0.38 
   1  12  -4   23.72    1.26 
  -1  12   4   22.82    1.33 
  -1 -12   4   22.78    1.06 
  -1 -12   4   22.15    0.93 
  -1  12   3    5.06    0.92 
   1  12  -3    6.98    0.92 
  -1  12   2    0.19    0.45 
   1  12  -2   -0.26    0.38 
   1  12  -1    0.78    0.46 
  -1  12   1    1.19    0.47 
   1  12   0    5.49    0.83 
  -1  12   0    6.75    0.76 
   1  12   1    4.13    0.87 
  -1  12  -1    4.51    0.73 
   1  12   2    4.51    0.89 
  -1  12  -2    4.25    0.73 
   1  12   3   27.91    1.46 
  -1  12  -3   30.90    1.42 
   1 -12   3   29.77    1.24 
   1 -12   3   30.07    1.04 
  -1  12  -4    7.34    0.78 
   1  12   4    5.91    0.85 
   1 -12   4    7.05    0.57 
   1  12   5   -0.13    0.45 
  -1  12  -5    0.08    0.38 
   1 -12   5    0.59    0.46 
   1 -12   5    0.79    0.35 
  -1  12  -6    6.38    0.75 
   1  12   6    5.67    0.85 
   1 -12   6    7.75    0.93 
   1  12   7    4.44    0.83 
  -1  12  -7    5.72    0.79 
   1 -12   7    5.96    0.99 
  -1  12  -8    1.60    0.54 
   1  12   8    0.54    0.52 
   1 -12   8    1.57    0.70 
   1  12   9    1.11    0.56 
  -1  12  -9    0.00    0.45 
   1 -12   9    0.81    0.68 
   1  12  10    2.83    0.75 
  -1  12 -10    2.50    0.63 
   1 -12  10    2.91    0.88 
  -1  12 -11    0.29    0.50 
   1  12  11    0.62    0.62 
   1 -12  11    1.38    0.80 
  -1  12 -12   -0.26    0.63 
   1 -12  12   -0.46    0.83 
   1  12  13   28.41    1.73 
   1 -12  13   30.10    2.39 
   1  13 -13   16.38    1.39 
  -1 -13  13   21.20    2.03 
  -1  13  12    7.93    1.14 
   1  13 -12   10.14    1.05 
  -1 -13  12   12.64    1.74 
  -1  13  11    1.94    0.73 
   1  13 -11    3.04    0.78 
  -1 -13  11    3.69    1.09 
  -1  13  10    0.00    0.58 
   1  13 -10   -0.41    0.49 
  -1 -13  10    1.74    0.85 
   1  13  -9    0.63    0.52 
  -1  13   9    1.55    0.63 
  -1 -13   9    1.36    1.19 
  -1  13   8    2.18    0.67 
   1  13  -8    1.59    0.60 
  -1 -13   8    1.81    0.71 
  -1  13   7    9.31    1.03 
   1  13  -7   11.18    0.99 
  -1 -13   7   12.18    1.08 
  -1  13   6   16.13    1.20 
   1  13  -6   16.35    1.14 
  -1 -13   6   16.99    1.14 
  -1 -13   6   16.05    1.06 
  -1  13   5    0.29    0.46 
   1  13  -5    0.04    0.44 
  -1 -13   5    0.57    0.40 
  -1 -13   5    0.41    0.43 
   1  13  -4   44.25    1.82 
  -1  13   4   41.77    1.89 
  -1  13   3    4.84    0.79 
   1  13  -3    4.12    0.78 
   1  13  -2    3.15    0.66 
  -1  13   2    1.86    0.55 
   1  13  -1    9.82    0.94 
  -1  13   1   10.94    0.96 
  -1  13   0    0.31    0.45 
   1  13   0    0.41    0.45 
   1  13   1    0.12    0.45 
  -1  13  -1    0.54    0.46 
   1  13   2    2.46    0.67 
  -1  13  -2    2.88    0.65 
  -1  13  -3    0.31    0.43 
   1  13   3    0.64    0.48 
  -1  13  -4   21.37    1.26 
   1  13   4   19.18    1.27 
   1 -13   4   18.81    0.91 
  -1  13  -5    3.54    0.77 
   1  13   5    2.80    0.62 
   1 -13   5    4.69    0.79 
   1 -13   5    5.24    0.67 
   1  13   6    2.97    0.68 
  -1  13  -6    2.91    0.69 
   1 -13   6    1.47    0.59 
   1  13   7   23.61    1.47 
  -1  13  -7   22.82    1.32 
   1 -13   7   22.48    1.58 
  -1  13  -8    0.63    0.54 
   1  13   8   -0.40    0.47 
   1 -13   8    0.35    0.73 
   1  13   9   -0.42    0.49 
  -1  13  -9   -0.06    0.50 
   1 -13   9    1.05    0.80 
  -1  13 -10    3.04    0.73 
   1 -13  10    3.86    1.15 
   1  13  11    1.22    0.72 
  -1  13 -11    2.21    0.75 
   1 -13  11    3.07    1.12 
   1  13  12   12.81    1.30 
  -1  13 -12   11.74    1.34 
   1 -13  12   15.04    2.97 
   1 -13  13    2.26    1.33 
  -1 -14  13    3.79    1.37 
   1  14 -12    0.90    0.77 
   1  14 -11   -0.79    0.63 
  -1 -14  11   -0.15    0.97 
  -1  14  10   -0.08    0.54 
   1  14 -10    0.53    0.65 
  -1 -14  10    1.49    0.93 
  -1  14   9    0.25    0.58 
   1  14  -9    0.43    0.54 
  -1 -14   9    0.76    0.81 
   1  14  -8   25.48    1.48 
  -1  14   8   33.44    2.64 
  -1 -14   8   25.89    1.65 
  -1  14   7    0.37    0.55 
   1  14  -7    1.93    0.64 
  -1 -14   7    1.36    0.67 
   1  14  -6    2.59    0.71 
  -1  14   6    1.69    0.62 
  -1 -14   6    1.19    0.55 
  -1  14   5    7.17    1.03 
   1  14  -5    6.65    0.92 
  -1  14   4    5.93    0.93 
   1  14  -4    6.89    0.94 
   1  14  -3    3.37    0.70 
  -1  14   3    3.45    0.72 
  -1  14   2    0.23    0.47 
   1  14  -2    0.07    0.43 
  -1  14   1    1.97    0.63 
   1  14  -1    3.04    0.73 
  -1  14   0    6.47    0.91 
   1  14   0    7.72    1.02 
  -1  14  -1    4.38    0.77 
   1  14   1    2.37    0.67 
  -1  14  -2    5.05    0.78 
   1  14   2    4.27    0.83 
  -1  14  -3    0.01    0.43 
   1  14   3    0.73    0.54 
  -1  14  -4    5.93    0.85 
   1  14   4    4.92    0.84 
  -1  14  -5    2.57    0.67 
   1  14   5    4.53    0.84 
   1 -14   5    4.08    0.73 
  -1  14  -6    5.01    0.80 
   1  14   6    4.62    0.91 
   1 -14   6    5.39    0.93 
  -1  14  -7    3.56    0.73 
   1  14   7    3.17    0.72 
   1 -14   7    3.42    0.95 
   1  14   8   -0.39    0.54 
  -1  14  -8   -0.32    0.53 
   1 -14   8   -1.26    0.86 
   1  14   9    2.11    0.71 
  -1  14  -9    2.04    0.66 
   1 -14   9    1.94    1.00 
   1  14  10    4.96    0.95 
  -1  14 -10    5.54    0.92 
   1 -14  10    9.96    1.61 
  -1  14 -11    1.86    0.85 
   1 -14  11   -1.34    0.99 
   1 -14  12    0.15    1.26 
   1  15 -12   -1.30    1.03 
  -1 -15  12    0.08    1.40 
   1  15 -11    0.91    1.48 
  -1 -15  11    1.34    1.23 
   1  15 -10    5.29    0.99 
  -1 -15  10    7.52    1.40 
   1  15  -9    3.14    0.82 
  -1 -15   9    2.57    1.04 
  -1  15   8    0.09    0.55 
   1  15  -8    0.06    0.57 
  -1 -15   8    0.59    0.79 
   1  15  -7    1.71    0.65 
  -1  15   7    1.23    0.66 
  -1 -15   7    0.22    0.71 
   1  15  -6    9.58    1.05 
  -1  15   6    9.79    1.14 
  -1  15   5    0.32    0.67 
   1  15  -5    0.50    0.52 
  -1  15   4   -0.37    0.52 
   1  15  -4    0.53    0.59 
   1  15  -3   16.98    1.26 
  -1  15   3   19.19    1.36 
   1  15  -2    5.23    0.85 
  -1  15   2    5.86    0.99 
  -1  15   1    0.20    0.54 
   1  15  -1    0.41    0.51 
   1  15   0    0.59    0.58 
  -1  15   0    1.74    0.66 
  -1  15  -1    1.83    0.60 
   1  15   1    1.37    0.63 
  -1  15  -2    3.61    0.77 
   1  15   2    2.39    0.70 
   1  15   3    6.66    1.04 
  -1  15  -3    6.47    0.93 
   1  15   4    7.23    1.10 
  -1  15  -4    7.44    0.96 
  -1  15  -5    4.52    0.85 
   1  15   5    3.59    1.05 
  -1  15  -6    0.79    0.58 
   1  15   6    1.05    0.58 
   1 -15   6    0.50    0.77 
  -1  15  -7   11.76    1.15 
   1  15   7   15.74    1.32 
   1 -15   7   13.34    1.44 
  -1  15  -8    2.34    0.76 
   1  15   8    1.04    0.74 
   1 -15   8    0.01    0.97 
  -1  15  -9    4.93    0.96 
   1 -15   9    5.41    1.34 
  -1  15 -10    2.85    0.90 
   1 -15  10    1.40    1.24 
   1 -15  11    3.63    1.63 
   1  16 -11    0.66    1.25 
   1  16 -10    5.09    1.09 
   1  16  -9    1.23    0.82 
   1  16  -8    1.88    0.77 
   1  16  -7    0.66    0.70 
  -1  16   6    5.78    1.33 
  -1  16   5   12.96    1.25 
  -1  16   4    0.65    0.68 
  -1  16   3    0.26    0.61 
  -1  16   2    0.22    0.51 
  -1  16   1    4.37    1.08 
   1  16   0    0.70    0.67 
  -1  16   0   -0.05    0.63 
   1  16   1    1.41    0.68 
  -1  16  -1    1.22    0.56 
   1  16   2    8.52    1.13 
  -1  16  -2   11.55    1.12 
  -1  16  -3    2.00    0.73 
   1  16   3    2.16    0.74 
  -1  16  -4   -0.15    0.58 
   1  16   4   -0.07    0.59 
   1  16   5   13.02    1.34 
  -1  16  -5   11.85    1.18 
  -1  16  -6    2.10    0.76 
  -1  16  -7    2.99    1.08 
  -1  16  -9    3.26    1.19 
   1  17  -5    1.47    0.75 
   1  17  -4   18.99    1.55 
   1  17  -3    2.99    0.82 
   1  17  -2   -0.76    0.53 
   1  17  -1    3.04    0.92 
  -1  17   1    3.61    0.93 
   1  17   0    8.06    1.58 
  -1  17  -1    2.88    0.82 
  -1  17  -2   25.50    1.66 
  -1  17  -3    4.74    0.94 
  -1  17  -4    0.00    0.65 
  -1  17  -5    2.60    0.84 
  -1  17  -6    2.64    0.87 
  -1  17  -7    1.11    1.08 
  -2   0  19    0.06    1.08 
  -2   0  18    0.58    0.52 
  -2   0  18    0.48    0.91 
  -2   0  17    1.16    0.86 
  -2   0  17   -0.21    0.50 
  -2   0  16    0.00    0.72 
  -2   0  16   -0.57    0.40 
  -2   0  15    0.59    0.68 
  -2   0  14   15.98    1.92 
   2   0 -14   14.96    0.88 
  -2   0  13   -0.22    0.47 
   2   0 -13   -0.10    0.32 
  -2   0  13   -0.21    0.26 
   2   0 -12    0.19    0.32 
  -2   0  12    0.51    0.40 
  -2   0  11    0.31    0.27 
   2   0 -11   -0.05    0.31 
   2   0 -10   28.21    1.06 
  -2   0  10   29.28    1.46 
  -2   0  10   27.73    1.04 
  -2   0   9    0.55    0.26 
  -2   0   9   -0.09    0.32 
   2   0  -9    0.14    0.24 
  -2   0   8   48.40    1.77 
   2   0  -8   46.68    1.36 
  -2   0   8   48.80    1.37 
   2   0  -7    0.02    0.24 
  -2   0   7   -0.45    0.27 
  -2   0   7    0.11    0.21 
  -2   0   6   28.81    0.92 
  -2   0   6   30.34    1.23 
   2   0  -6   28.70    0.92 
   2   0  -5    0.18    0.18 
  -2   0   5   -0.24    0.18 
  -2   0   5    0.02    0.22 
  -2   0   3   -0.17    0.17 
   2   0  -3    0.01    0.15 
  -2   0   3   -0.06    0.13 
   2   0  -3   -0.23    0.17 
  -2   0   1   -0.12    0.07 
  -2   0   1   -0.19    0.06 
   2   0  -1   -0.15    0.07 
   2   0   0   87.37    1.79 
   2   0   0   87.50    1.71 
  -2   0   0   86.08    1.78 
   2   0   1    0.27    0.14 
   2   0   1   -0.10    0.07 
  -2   0  -1   -0.06    0.06 
  -2   0  -1    0.05    0.09 
   2   0   2    3.17    0.27 
  -2   0  -2    2.58    0.26 
  -2   0  -3   -0.10    0.13 
   2   0   4   15.32    0.68 
  -2   0  -4   14.16    0.72 
  -2   0  -5   -0.01    0.32 
   2   0   5    0.02    0.15 
   2   0   5   -0.16    0.15 
   2   0   5   -0.38    0.22 
  -2   0  -6    9.29    0.75 
   2   0   6   10.27    0.42 
   2   0   6    9.85    0.67 
   2   0   6    9.66    0.40 
   2   0   7    0.04    0.16 
   2   0   7    0.04    0.14 
   2   0   7    0.08    0.25 
   2   0   8   24.64    0.77 
  -2   0  -8   24.75    1.33 
   2   0   8   24.10    0.75 
   2   0   8   26.13    1.20 
  -2   0  -9    0.24    0.38 
   2   0   9    0.05    0.22 
   2   0   9   -0.16    0.20 
  -2   0 -10   64.12    2.51 
   2   0  10   62.55    1.57 
   2   0  10   64.80    1.60 
   2   0  11   -0.15    0.26 
   2   0  11    0.10    0.22 
  -2   0 -11    0.35    0.49 
  -2   0 -12    0.50    0.56 
   2   0  12    0.09    0.25 
   2   0  12    0.33    0.27 
  -2   0 -13    0.75    0.57 
   2   0  13    0.50    0.29 
  -2   0 -14   17.69    1.62 
  -2   0 -15    0.93    0.68 
  -2   0 -16   40.86    2.56 
  -2   0 -17    0.68    0.83 
  -2   1  19   15.40    1.86 
  -2   1  18   24.82    1.30 
  -2  -1  18   22.48    1.23 
  -2  -1  18   24.85    2.16 
  -2   1  17   19.16    1.14 
  -2   1  17   23.55    1.98 
  -2  -1  17   18.15    1.09 
  -2  -1  17   20.13    1.91 
  -2   1  16    1.07    0.53 
  -2   1  16    0.69    0.72 
  -2  -1  16    0.34    0.68 
  -2   1  15    2.11    0.89 
  -2   1  15    1.67    0.51 
   2   1 -15    2.35    0.52 
  -2  -1  15    1.35    0.79 
  -2   1  14    0.00    0.53 
   2   1 -14   -0.04    0.35 
  -2  -1  14   -0.43    0.49 
  -2  -1  14    0.06    0.35 
  -2   1  13    0.89    0.58 
  -2   1  13    0.99    0.41 
   2   1 -13    0.21    0.34 
  -2  -1  13    0.98    0.40 
   2   1 -12   24.48    1.04 
  -2   1  12   24.13    1.58 
  -2   1  12   24.99    1.08 
  -2  -1  12   24.36    1.16 
   2  -1 -12   25.29    1.08 
  -2   1  11   14.78    0.80 
   2   1 -11   14.36    0.78 
  -2  -1  11   13.29    0.73 
   2  -1 -11   13.92    0.80 
   2   1 -10    5.38    0.51 
  -2   1  10    5.27    0.51 
  -2   1  10    8.35    1.04 
   2  -1 -10    6.96    0.56 
  -2  -1  10    6.16    0.51 
  -2  -1  10    5.08    0.80 
   2   1  -9    2.08    0.56 
  -2   1   9    2.79    0.45 
   2   1  -9    3.25    0.46 
  -2   1   9    2.21    0.59 
  -2  -1   9    2.20    0.58 
  -2  -1   9    3.35    0.45 
   2  -1  -9    1.98    0.37 
   2   1  -8    2.09    0.38 
  -2   1   8    0.74    0.33 
  -2   1   8    1.66    0.35 
   2   1  -8    0.78    0.46 
  -2  -1   8    1.22    0.43 
   2  -1  -8    1.75    0.35 
  -2  -1   8    1.71    0.34 
  -2   1   7    0.43    0.25 
  -2   1   7    0.77    0.36 
   2   1  -7    0.74    0.42 
  -2  -1   7    1.29    0.29 
  -2  -1   7    0.50    0.34 
   2  -1  -7    0.83    0.30 
  -2   1   6   29.82    0.96 
   2   1  -6   29.76    0.95 
  -2   1   6   30.29    1.24 
  -2   1   6   31.07    1.23 
  -2  -1   6   31.77    0.95 
   2  -1  -6   30.95    0.99 
  -2  -1   6   29.95    1.26 
   2   1  -5  144.53    3.02 
  -2   1   5  139.21    3.02 
  -2   1   5  148.01    3.35 
  -2   1   5  146.41    3.33 
   2  -1  -5  142.01    3.04 
  -2  -1   5  145.32    3.40 
  -2   1   4  402.56    7.77 
  -2   1   4  401.00    7.99 
  -2   1   4  406.37    7.98 
   2   1  -4  403.99    7.75 
  -2  -1   4  408.36    8.09 
  -2  -1   4  430.26    8.61 
  -2  -1   4  399.71    7.74 
   2  -1  -4  397.22    7.77 
  -2   1   3   53.86    1.35 
  -2   1   3   54.23    1.27 
   2   1  -3   55.03    1.26 
   2   1  -3   53.82    1.45 
  -2  -1   3   52.84    1.42 
   2  -1  -3   54.92    1.27 
  -2  -1   3   53.40    1.24 
   2  -1  -3   49.94    1.35 
   2   1  -2  198.55    4.07 
   2   1  -2  205.52    3.96 
  -2   1   2  205.60    3.96 
  -2   1   2  204.84    3.96 
  -2  -1   2  201.64    4.05 
   2  -1  -2  203.46    3.96 
  -2  -1   2  204.74    3.96 
  -2   1   1   19.69    0.55 
  -2   1   1   23.18    0.57 
   2   1  -1   21.22    0.57 
   2   1  -1   20.42    0.58 
   2  -1  -1   21.22    0.56 
  -2  -1   1   20.46    0.56 
  -2  -1   1   21.07    0.57 
  -2   1   0  230.04    4.45 
   2   1   0  239.85    4.52 
   2   1   0  238.96    4.51 
  -2   1   0  241.02    4.54 
  -2  -1   0  246.40    4.53 
   2  -1   0  230.42    4.54 
   2  -1   0  235.42    4.46 
   2   1   1  631.31   11.49 
  -2  -1  -1  602.18   11.41 
  -2   1  -2  118.80    2.59 
   2   1   2  122.75    2.51 
   2   1   2  117.64    2.38 
   2  -1   2  120.51    2.56 
  -2  -1  -2  123.80    2.54 
  -2  -1  -2  119.30    2.37 
  -2   1  -3  288.05    5.86 
   2   1   3  290.59    5.71 
   2   1   3  293.18    5.50 
  -2  -1  -3  291.00    5.78 
  -2  -1  -3  287.82    5.50 
  -2   1  -4    8.37    0.58 
   2   1   4    7.56    0.35 
   2   1   4    7.77    0.36 
   2   1   4    8.43    0.49 
  -2  -1  -4    8.13    0.54 
   2  -1   4    7.49    0.51 
   2   1   5  154.14    3.45 
  -2   1  -5  149.62    3.67 
   2   1   5  159.57    3.13 
   2   1   5  152.30    3.11 
  -2  -1  -5  156.61    3.62 
   2  -1   5  155.30    3.54 
   2   1   6   11.93    0.71 
  -2   1  -6   12.03    0.84 
   2   1   6   11.97    0.51 
   2   1   6   12.11    0.50 
  -2  -1  -6   12.01    0.81 
   2  -1   6   11.75    0.74 
   2   1   7    5.33    0.43 
   2   1   7    4.71    0.51 
  -2   1  -7    5.85    0.66 
   2   1   7    5.09    0.37 
   2  -1   7    5.47    0.58 
  -2  -1  -7    5.19    0.62 
   2   1   8   16.71    0.65 
   2   1   8   15.91    0.92 
  -2   1  -8   15.91    1.09 
   2   1   8   17.03    0.66 
   2  -1   8   17.07    0.98 
  -2  -1  -8   14.86    1.04 
   2   1   9    5.09    0.41 
   2   1   9    4.17    0.58 
  -2   1  -9    5.77    0.87 
   2   1   9    5.02    0.43 
  -2  -1  -9    7.31    0.98 
   2  -1   9    4.60    0.35 
  -2   1 -10    0.42    0.45 
   2   1  10    0.76    0.30 
   2   1  10    0.36    0.28 
   2  -1  10    0.74    0.25 
  -2  -1 -10    0.39    0.42 
  -2   1 -11    6.22    1.01 
   2   1  11    4.62    0.48 
   2   1  11    5.35    0.54 
  -2  -1 -11    5.82    1.05 
   2   1  12    7.50    0.53 
  -2   1 -12    7.49    1.25 
   2   1  12    6.48    0.55 
  -2  -1 -12    8.34    1.26 
  -2   1 -13    6.66    1.26 
   2   1  13    5.31    0.51 
   2   1  13    4.03    0.45 
  -2  -1 -13    5.07    1.01 
   2   1  14   47.96    1.46 
   2   1  14   48.12    1.42 
  -2   1 -14   47.65    2.59 
  -2  -1 -14   47.71    2.55 
  -2   1 -15   12.89    1.86 
  -2  -1 -15   10.44    1.60 
  -2   1 -16   15.53    1.94 
  -2  -1 -16   12.40    1.53 
  -2   1 -17    3.97    1.16 
  -2  -1 -17    2.00    0.99 
  -2   2  19   30.15    1.61 
  -2   2  19   26.73    2.26 
  -2   2  18   10.05    2.15 
  -2  -2  18    5.88    1.37 
  -2  -2  18    6.86    0.87 
  -2   2  17    1.08    0.50 
  -2   2  17    0.81    0.77 
  -2  -2  17    1.66    0.93 
  -2   2  16   11.33    1.66 
   2   2 -16    6.91    0.68 
  -2   2  16    6.91    0.86 
  -2  -2  16    7.81    1.37 
  -2   2  15    3.44    0.64 
  -2   2  15    0.73    0.72 
   2   2 -15    2.64    0.53 
  -2  -2  15    2.49    0.88 
  -2   2  14    2.24    0.53 
  -2   2  14    2.70    0.89 
   2   2 -14    1.63    0.45 
  -2  -2  14    1.10    0.71 
  -2  -2  14    1.64    0.47 
  -2   2  13    0.68    0.63 
   2   2 -13    1.03    0.38 
  -2   2  13    1.26    0.46 
  -2  -2  13    0.97    0.38 
  -2   2  12    3.82    0.88 
  -2   2  12    4.41    0.65 
  -2   2  12    3.46    0.61 
   2   2 -12    4.13    0.58 
  -2  -2  12    4.18    0.55 
  -2   2  11   11.00    0.74 
  -2   2  11   11.87    1.07 
   2   2 -11   11.39    0.70 
  -2  -2  11   11.46    0.68 
  -2   2  10   34.15    1.56 
   2   2 -10   36.63    1.21 
  -2   2  10   34.62    1.67 
  -2   2  10   34.97    1.25 
   2   2 -10   35.98    1.79 
  -2  -2  10   35.74    1.18 
  -2   2   9    5.51    0.51 
   2   2  -9    5.61    0.84 
  -2   2   9    6.34    0.67 
   2   2  -9    5.83    0.49 
  -2  -2   9    7.63    0.99 
  -2  -2   9    5.52    0.45 
   2  -2  -9    5.62    0.51 
  -2   2   8    5.96    0.62 
  -2   2   8    5.54    0.65 
   2   2  -8    6.42    0.77 
   2   2  -8    6.39    0.48 
  -2   2   8    5.91    0.49 
  -2  -2   8    6.22    0.45 
  -2  -2   8    6.51    0.69 
   2  -2  -8    6.37    0.51 
   2   2  -7    6.78    0.48 
   2   2  -7    6.91    0.73 
  -2   2   7    7.94    0.54 
  -2   2   7    7.82    0.69 
  -2   2   7    6.74    0.63 
  -2  -2   7    6.93    0.70 
  -2  -2   7    7.10    0.46 
   2  -2  -7    6.48    0.51 
  -2   2   6    7.92    0.66 
  -2   2   6    7.98    0.53 
   2   2  -6    7.92    0.49 
  -2   2   6    6.92    0.63 
   2  -2  -6    7.82    0.54 
  -2  -2   6    8.17    0.71 
  -2  -2   6    7.62    0.47 
  -2   2   5   49.74    1.49 
  -2   2   5   49.11    1.34 
   2   2  -5   51.03    1.30 
   2  -2  -5   49.21    1.34 
  -2  -2   5   51.05    1.31 
  -2  -2   5   51.54    1.63 
  -2   2   4    0.28    0.19 
  -2   2   4    0.18    0.17 
  -2   2   4    0.09    0.16 
  -2  -2   4   -0.08    0.19 
  -2  -2   4    0.01    0.20 
   2  -2  -4    0.08    0.18 
  -2  -2   4    0.46    0.16 
  -2   2   3   35.40    0.95 
   2   2  -3   34.52    0.92 
  -2   2   3   33.53    0.92 
   2  -2  -3   35.67    0.96 
  -2  -2   3   33.98    1.07 
   2  -2  -3   33.82    0.96 
  -2  -2   3   33.06    0.90 
  -2  -2   3   34.07    1.08 
   2   2  -2  460.46    8.60 
  -2   2   2  462.54    8.51 
   2   2  -2  459.00    8.73 
  -2   2   2  455.77    8.61 
  -2  -2   2  453.62    8.59 
   2  -2  -2  450.64    8.61 
  -2  -2   2  453.98    8.69 
   2  -2  -2  445.25    8.54 
  -2   2   1  103.17    2.02 
  -2   2   1  101.64    2.07 
  -2   2   1   97.60    2.07 
   2   2  -1   99.71    2.08 
   2   2  -1  101.47    2.08 
   2  -2  -1   96.34    1.99 
  -2  -2   1   97.91    2.07 
  -2  -2   1   98.53    2.04 
   2   2   0   20.43    0.53 
   2   2   0   20.72    0.60 
  -2   2   0   19.81    0.57 
  -2   2   0   20.00    0.56 
  -2  -2   0   21.30    0.55 
  -2  -2   0   19.22    0.58 
  -2   2  -1  175.91    3.59 
   2   2   1  184.91    3.49 
   2   2   1  182.70    3.53 
  -2  -2  -1  186.60    3.49 
   2  -2   1  185.49    3.58 
   2  -2   1  181.54    3.44 
  -2  -2  -1  157.09    3.50 
  -2   2  -2   25.15    0.85 
   2   2   2   27.73    0.75 
   2   2   2   28.02    0.75 
  -2   2  -2   28.10    0.62 
   2  -2   2   27.49    0.63 
  -2  -2  -2   27.75    0.77 
   2  -2   2   27.95    0.84 
   2   2   3   68.66    1.59 
   2   2   3   67.99    1.53 
  -2   2  -3   68.36    1.79 
  -2  -2  -3   67.06    1.52 
  -2  -2  -3   65.93    1.63 
   2  -2   3   66.63    1.70 
   2   2   4   77.11    1.74 
   2   2   4   77.05    1.86 
  -2   2  -4   75.72    2.10 
  -2  -2  -4   77.57    1.97 
  -2  -2  -4   77.74    1.74 
   2  -2   4   75.60    1.99 
   2   2   5   14.27    0.59 
  -2   2  -5   15.26    0.90 
   2   2   5   13.24    0.67 
   2   2   5   14.88    0.71 
  -2  -2  -5   14.77    0.80 
   2  -2   5   15.25    0.80 
   2   2   6   76.80    1.81 
   2   2   6   77.11    1.80 
   2   2   6   76.07    2.04 
  -2   2  -6   77.35    2.36 
  -2  -2  -6   73.30    2.19 
   2   2   7    7.06    0.46 
   2   2   7    6.36    0.44 
   2   2   7    6.25    0.56 
  -2   2  -7    6.23    0.70 
   2  -2   7    6.71    1.04 
  -2  -2  -7    7.08    0.68 
   2   2   8    3.70    0.40 
  -2   2  -8    4.71    0.82 
   2   2   8    3.50    0.39 
   2  -2   8    4.97    0.71 
  -2  -2  -8    4.95    0.79 
   2   2   9  117.01    3.09 
  -2   2  -9  114.72    3.53 
   2   2   9  114.67    2.65 
   2   2   9  113.79    2.63 
  -2  -2  -9  111.66    3.36 
  -2   2 -10    5.34    1.03 
   2   2  10    4.13    0.47 
   2   2  10    4.12    0.47 
  -2  -2 -10    5.19    0.85 
   2   2  11   78.56    2.05 
   2   2  11   83.23    2.11 
  -2   2 -11   81.50    3.11 
  -2  -2 -11   82.10    2.98 
   2   2  12    0.89    0.33 
   2   2  12    0.03    0.28 
  -2  -2 -12   -0.25    0.42 
   2   2  13    0.69    0.38 
   2   2  13   -0.23    0.35 
  -2   2 -13    0.60    0.68 
  -2  -2 -13    0.66    1.07 
   2   2  14    4.35    0.60 
  -2   2 -14    3.43    1.00 
  -2  -2 -14    6.45    1.28 
   2   2  15   16.52    0.86 
  -2   2 -15   15.34    1.60 
  -2  -2 -15   14.15    1.53 
   2   2  16    1.00    0.41 
  -2  -2 -16    0.66    0.76 
  -2   2 -17    5.59    1.30 
  -2   3  19    0.49    0.93 
  -2   3  19    1.19    0.70 
  -2   3  18    7.33    1.42 
  -2   3  18    7.29    0.94 
  -2  -3  18    6.29    1.50 
   2   3 -17    6.09    0.76 
  -2   3  17    7.65    1.45 
  -2   3  17    5.54    1.02 
  -2  -3  17    4.11    1.36 
  -2   3  16   15.55    1.06 
  -2   3  16   14.22    1.49 
   2   3 -16   15.65    0.92 
  -2  -3  16   14.95    1.66 
  -2   3  15   15.53    1.46 
   2   3 -15   14.86    0.88 
  -2   3  15   16.68    1.08 
  -2  -3  15   16.09    1.60 
  -2   3  14    0.15    0.41 
  -2   3  14    0.05    0.54 
   2   3 -14   -0.11    0.35 
  -2  -3  14    0.19    0.34 
  -2  -3  14   -0.26    0.53 
  -2   3  13    1.07    0.46 
  -2   3  13    0.47    0.58 
   2   3 -13    1.06    0.40 
  -2  -3  13    0.31    0.37 
   2   3 -12    0.00    0.30 
  -2   3  12   -0.13    0.34 
  -2   3  12   -0.10    0.47 
  -2  -3  12   -0.02    0.32 
  -2   3  11    0.95    0.44 
  -2   3  11    0.78    0.56 
  -2   3  11    0.77    0.37 
   2   3 -11    0.47    0.33 
  -2   3  11    0.29    0.44 
  -2  -3  11    0.65    0.31 
  -2   3  10   39.77    1.77 
  -2   3  10   40.42    1.44 
   2   3 -10   39.12    1.29 
  -2   3  10   37.68    1.61 
  -2   3  10   38.92    1.40 
  -2  -3  10   39.07    1.26 
  -2   3   9   -0.17    0.31 
  -2   3   9    0.36    0.31 
  -2   3   9    0.31    0.27 
   2   3  -9   -0.14    0.23 
   2   3  -9    0.39    0.36 
  -2  -3   9    0.11    0.24 
  -2  -3   9    0.09    0.36 
  -2   3   8    7.97    0.67 
  -2   3   8    7.39    0.70 
   2   3  -8    6.67    0.50 
   2   3  -8    7.03    0.77 
  -2   3   8    7.44    0.57 
  -2   3   8    7.12    0.56 
  -2  -3   8    6.52    0.47 
  -2   3   7    0.59    0.30 
   2   3  -7    0.48    0.23 
  -2   3   7    0.26    0.34 
  -2   3   7    0.07    0.28 
   2   3  -7   -0.14    0.31 
  -2   3   7    0.29    0.28 
  -2  -3   7    0.36    0.29 
  -2  -3   7    0.54    0.24 
  -2   3   6   13.55    0.78 
  -2   3   6   13.39    0.70 
   2   3  -6   14.52    0.65 
  -2   3   6   14.49    0.71 
  -2   3   6   13.15    0.76 
  -2  -3   6   13.66    0.88 
  -2  -3   6   13.07    0.61 
  -2   3   5    9.49    0.57 
   2   3  -5    9.23    0.51 
  -2   3   5    8.01    0.58 
  -2   3   5    8.16    0.57 
  -2   3   5    8.23    0.56 
  -2  -3   5    8.23    0.69 
  -2  -3   5    8.54    0.48 
  -2   3   4    0.09    0.17 
  -2   3   4    0.33    0.20 
  -2   3   4    0.11    0.18 
   2   3  -4    0.34    0.20 
  -2   3   4    0.86    0.22 
  -2  -3   4   -0.19    0.21 
  -2  -3   4    0.00    0.22 
  -2  -3   4    0.24    0.17 
  -2   3   3  189.35    3.69 
  -2   3   3  189.94    3.86 
   2   3  -3  188.20    3.80 
  -2   3   3  192.34    3.86 
  -2  -3   3  185.38    3.98 
  -2  -3   3  177.42    3.99 
   2  -3  -3  187.52    3.77 
  -2   3   2   37.22    1.03 
   2   3  -2   39.29    1.02 
  -2   3   2   38.81    0.88 
   2   3  -2   35.46    1.08 
  -2   3   2   37.51    1.14 
  -2  -3   2   37.34    1.06 
  -2  -3   2   39.78    1.04 
   2  -3  -2   38.25    0.90 
   2   3  -1    5.80    0.33 
   2   3  -1    6.53    0.35 
  -2   3   1    5.53    0.25 
  -2   3   1    5.51    0.33 
   2  -3  -1    6.15    0.25 
  -2  -3   1    5.69    0.29 
  -2  -3   1    5.61    0.32 
   2  -3  -1    5.31    0.33 
  -2   3   0    0.20    0.10 
   2   3   0    0.06    0.12 
   2   3   0    0.19    0.09 
  -2   3   0    0.16    0.13 
  -2  -3   0    0.65    0.16 
   2  -3   0    0.08    0.12 
  -2  -3   0    0.30    0.09 
   2  -3   0    0.18    0.10 
   2   3   1   53.22    1.15 
   2   3   1   49.35    1.27 
  -2   3  -1   52.20    1.30 
  -2   3  -1   53.57    1.21 
  -2  -3  -1   54.37    1.16 
  -2  -3  -1   53.44    1.30 
   2  -3   1   52.17    1.21 
   2   3   2    7.84    0.41 
  -2   3  -2    7.84    0.46 
  -2   3  -2    8.78    0.33 
   2   3   2    8.50    0.34 
  -2  -3  -2    7.99    0.35 
   2  -3   2    8.31    0.51 
  -2  -3  -2    8.31    0.49 
   2  -3   2    8.36    0.35 
  -2   3  -3    7.07    0.31 
  -2   3  -3    7.22    0.54 
   2   3   3    7.18    0.43 
   2   3   3    7.46    0.38 
   2  -3   3    7.47    0.49 
   2  -3   3    6.95    0.32 
  -2  -3  -3    7.67    0.43 
   2   3   4   17.60    0.69 
  -2   3  -4   17.43    0.52 
  -2   3  -4   17.06    0.90 
   2   3   4   16.74    0.76 
   2  -3   4   16.51    0.80 
   2  -3   4   16.82    0.51 
  -2  -3  -4   15.77    0.74 
  -2   3  -5  108.90    2.91 
   2   3   5  110.07    2.46 
   2   3   5  109.19    2.51 
  -2  -3  -5  106.98    2.68 
   2  -3   5  108.34    2.20 
  -2  -3  -5  108.96    2.44 
   2  -3   5  107.34    2.72 
   2   3   6  645.97   12.37 
   2   3   6  638.31   12.36 
   2   3   6  642.34   12.52 
  -2   3  -6  644.26   12.07 
  -2   3  -6  671.21   13.19 
  -2  -3  -6  642.17   12.77 
   2  -3   6  653.96   12.80 
   2   3   7   19.22    0.89 
   2   3   7   19.92    0.80 
   2   3   7   19.21    0.79 
  -2   3  -7   18.49    1.14 
  -2  -3  -7   17.72    1.01 
   2  -3   7   17.69    0.99 
   2   3   8   13.33    0.70 
   2   3   8   13.36    0.80 
   2   3   8   13.18    0.68 
  -2   3  -8   12.39    1.03 
   2  -3   8   14.00    1.00 
  -2  -3  -8   12.13    0.94 
  -2   3  -9   44.98    2.03 
   2   3   9   43.77    1.37 
   2   3   9   44.16    1.61 
   2   3   9   45.08    1.39 
  -2  -3  -9   43.00    1.84 
  -2   3 -10   10.09    1.10 
   2   3  10   12.43    0.72 
   2   3  10   11.59    0.71 
  -2  -3 -10   12.35    1.08 
   2   3  11    0.61    0.35 
  -2   3 -11    0.01    0.49 
   2   3  11    0.40    0.39 
  -2  -3 -11   -0.04    0.47 
  -2   3 -12    8.89    1.32 
   2   3  12    5.73    0.59 
  -2  -3 -12    9.49    1.35 
   2   3  13    5.55    0.68 
  -2   3 -13    6.14    1.21 
   2   3  13    4.51    0.58 
  -2  -3 -13    4.89    1.27 
  -2   3 -14   16.53    1.61 
   2   3  14   16.97    0.94 
   2   3  14   16.50    0.90 
  -2  -3 -14   14.68    1.46 
   2   3  15    1.66    0.46 
  -2   3 -15    1.40    0.86 
  -2  -3 -15    1.64    0.91 
   2   3  16    1.17    0.43 
  -2   3 -16    1.71    0.86 
  -2  -3 -16    1.02    0.75 
  -2   3 -17    0.97    1.06 
  -2   4  19    1.17    0.64 
  -2   4  19    1.23    0.89 
  -2   4  18    0.84    0.86 
  -2   4  18    1.56    0.69 
  -2  -4  18    1.17    0.87 
  -2   4  17    1.08    0.80 
  -2   4  17    0.52    0.54 
   2   4 -17    0.84    0.53 
  -2  -4  17    1.45    1.09 
  -2   4  16   -0.86    0.64 
   2   4 -16    0.55    0.41 
  -2   4  16    0.00    0.59 
  -2  -4  16   -0.61    0.66 
   2   4 -15    6.30    0.73 
  -2   4  15    8.23    1.24 
  -2   4  15    5.98    0.82 
  -2  -4  15    5.40    1.24 
  -2   4  14    1.75    0.72 
  -2   4  14    1.34    0.52 
   2   4 -14    1.83    0.50 
  -2  -4  14    0.84    0.67 
  -2  -4  14    1.61    0.44 
  -2   4  13   19.01    1.12 
  -2   4  13   17.79    1.37 
   2   4 -13   17.94    0.92 
  -2  -4  13   20.90    0.94 
  -2   4  12   11.55    0.87 
   2   4 -12   11.24    0.74 
  -2   4  12   12.98    1.15 
  -2  -4  12   13.77    0.89 
  -2   4  11    0.10    0.44 
  -2   4  11    0.07    0.35 
  -2   4  11    0.17    0.38 
  -2  -4  11    0.29    0.29 
  -2   4  10    9.31    0.72 
  -2   4  10    8.92    0.95 
  -2   4  10    8.24    0.70 
   2   4 -10    8.44    0.63 
  -2   4  10    9.31    0.90 
  -2  -4  10    8.99    0.60 
  -2   4   9   75.59    2.17 
   2   4  -9   79.13    2.04 
  -2   4   9   75.83    2.30 
  -2   4   9   76.97    2.17 
  -2   4   9   74.91    2.39 
  -2  -4   9   72.80    1.95 
  -2  -4   9   80.31    2.68 
   2   4  -8    6.57    0.50 
  -2   4   8    6.29    0.60 
  -2   4   8    5.48    0.53 
  -2   4   8    5.38    0.62 
  -2  -4   8    5.37    0.45 
  -2  -4   8    5.72    0.69 
  -2   4   7    1.33    0.37 
  -2   4   7    1.69    0.41 
  -2   4   7    1.77    0.42 
   2   4  -7    1.69    0.33 
  -2   4   7    1.39    0.36 
  -2  -4   7    1.84    0.32 
  -2  -4   7    1.92    0.47 
  -2   4   6    3.78    0.53 
   2   4  -6    4.31    0.42 
  -2   4   6    3.46    0.49 
  -2   4   6    3.59    0.47 
  -2   4   6    3.28    0.46 
  -2  -4   6    3.20    0.51 
  -2  -4   6    3.75    0.43 
  -2   4   5   90.68    2.17 
   2   4  -5   94.37    2.20 
  -2   4   5   90.09    2.27 
  -2   4   5   90.07    2.22 
  -2   4   5   95.06    2.28 
  -2  -4   5   95.78    2.53 
  -2  -4   5   89.43    2.52 
  -2  -4   5   92.59    2.15 
  -2   4   4   34.73    1.14 
   2   4  -4   35.98    1.08 
  -2   4   4   34.05    1.04 
  -2   4   4   35.87    0.97 
  -2   4   4   35.54    1.14 
  -2  -4   4   35.16    1.05 
  -2  -4   4   34.89    1.28 
  -2  -4   4   34.66    1.28 
  -2   4   3   97.72    2.28 
  -2   4   3   96.36    1.98 
   2   4  -3  100.98    2.23 
   2  -4  -3   93.95    2.08 
  -2  -4   3   95.93    2.19 
  -2  -4   3   96.97    2.35 
   2   4  -2   77.38    1.78 
  -2   4   2   74.64    1.80 
  -2   4   2   73.07    1.58 
  -2  -4   2   72.48    1.76 
  -2  -4   2   71.52    1.74 
  -2  -4   2   72.80    1.81 
   2  -4  -2   74.80    1.80 
   2  -4  -2   74.46    1.55 
   2   4  -1    8.99    0.47 
  -2   4   1    9.20    0.47 
  -2   4   1    9.39    0.34 
   2   4  -1    8.67    0.44 
   2  -4  -1    9.43    0.47 
  -2  -4   1    8.98    0.46 
   2  -4  -1    9.32    0.33 
  -2  -4   1    9.74    0.39 
  -2   4   0   34.94    0.91 
  -2   4   0   35.64    0.99 
   2   4   0   34.10    0.86 
   2   4   0   36.48    1.04 
  -2  -4   0   33.88    1.01 
   2  -4   0   34.83    0.88 
  -2  -4   0   35.78    0.82 
   2   4   1    0.07    0.17 
  -2   4  -1    0.15    0.15 
  -2   4  -1   -0.02    0.16 
   2  -4   1    0.09    0.17 
  -2  -4  -1    0.17    0.09 
   2  -4   1   -0.01    0.13 
  -2  -4  -1    0.28    0.19 
   2   4   2   30.41    0.98 
   2   4   2   30.93    0.78 
  -2   4  -2   31.53    1.06 
  -2   4  -2   30.79    0.86 
   2  -4   2   32.12    0.89 
  -2  -4  -2   31.08    0.81 
  -2  -4  -2   29.45    0.96 
   2   4   3   33.01    0.88 
  -2   4  -3   34.08    0.90 
   2   4   3   33.70    1.06 
  -2   4  -3   30.79    1.17 
  -2  -4  -3   32.58    1.04 
   2  -4   3   32.57    0.91 
   2  -4   3   32.45    1.09 
  -2  -4  -3   33.45    0.96 
   2   4   4   16.02    0.71 
  -2   4  -4   16.43    0.57 
  -2   4  -4   16.89    0.92 
   2   4   4   15.02    0.60 
   2  -4   4   15.97    0.57 
   2  -4   4   16.22    0.79 
  -2  -4  -4   16.13    0.71 
  -2  -4  -4   16.41    0.71 
   2   4   5  114.92    2.58 
  -2   4  -5  111.09    3.04 
   2   4   5  113.81    2.65 
  -2   4  -5  118.08    2.40 
  -2  -4  -5  112.19    2.75 
   2  -4   5  113.23    2.86 
   2  -4   5  116.35    2.39 
  -2   4  -6   92.28    1.98 
   2   4   6   89.21    2.24 
  -2   4  -6   91.99    2.86 
   2   4   6   93.09    2.25 
   2  -4   6   94.34    2.54 
  -2  -4  -6   86.65    2.42 
   2  -4   6   92.23    1.97 
   2   4   7    1.64    0.33 
   2   4   7    1.96    0.38 
  -2   4  -7    1.06    0.49 
  -2   4  -7    1.29    0.23 
   2   4   7    1.44    0.36 
   2  -4   7    1.60    0.24 
  -2  -4  -7    1.61    0.46 
   2  -4   7    1.48    0.44 
   2   4   8   46.56    1.45 
  -2   4  -8   45.45    1.98 
   2   4   8   44.94    1.51 
   2   4   8   44.72    1.43 
  -2  -4  -8   44.92    2.04 
   2   4   9    2.60    0.45 
  -2   4  -9    2.81    0.71 
   2   4   9    1.88    0.42 
   2   4   9    2.98    0.49 
  -2  -4  -9    1.50    0.54 
   2   4  10    5.95    0.60 
  -2   4 -10    8.95    1.33 
  -2  -4 -10    7.84    0.91 
  -2   4 -11   41.36    2.20 
   2   4  11   41.95    1.45 
   2   4  11   41.82    1.46 
  -2  -4 -11   41.35    1.98 
   2   4  12    1.20    0.41 
  -2   4 -12    0.88    0.67 
   2   4  12    1.66    0.47 
  -2  -4 -12    0.56    0.61 
  -2   4 -13    4.70    1.20 
   2   4  13    2.89    0.55 
  -2  -4 -13    4.54    0.97 
   2   4  14    1.38    0.44 
  -2   4 -14    1.25    0.76 
  -2  -4 -14    0.57    0.65 
   2   4  15    0.75    0.46 
  -2   4 -15    0.48    0.70 
  -2  -4 -15   -0.12    0.62 
  -2   4 -16    1.44    0.84 
   2   4  16    2.12    0.56 
   2   4  18   -0.86    1.16 
  -2   5  19    2.14    0.75 
  -2   5  19   -0.19    0.89 
  -2   5  18    1.96    0.99 
  -2   5  18    3.98    0.81 
   2   5 -17    2.62    0.66 
  -2   5  17    1.80    0.66 
  -2   5  17    1.24    0.80 
  -2  -5  17    0.01    0.82 
  -2   5  16    1.58    0.69 
   2   5 -16    0.78    0.49 
  -2   5  16    1.02    0.54 
  -2  -5  16    0.29    0.77 
   2   5 -15    0.86    0.44 
  -2   5  15    0.66    0.50 
  -2   5  15    1.54    1.12 
  -2  -5  15    0.77    0.63 
  -2   5  14   -0.24    0.55 
   2   5 -14    0.63    0.39 
  -2   5  14    0.20    0.45 
  -2  -5  14   -0.20    0.56 
  -2   5  13    8.42    1.04 
  -2   5  13    8.38    0.85 
   2   5 -13    8.77    0.70 
  -2  -5  13    7.55    0.68 
  -2  -5  13    9.97    1.48 
   2   5 -12   12.52    0.79 
  -2   5  12   12.78    1.10 
  -2   5  12   12.56    0.93 
  -2  -5  12   11.81    0.75 
  -2   5  11    6.48    0.72 
   2   5 -11    6.32    0.60 
  -2   5  11    5.50    0.86 
  -2   5  11    6.16    0.69 
  -2   5  10    0.50    0.37 
  -2   5  10    0.77    0.44 
  -2   5  10    0.45    0.37 
  -2  -5  10    0.61    0.33 
  -2   5   9    5.84    0.63 
  -2   5   9    5.67    0.62 
  -2   5   9    4.86    0.59 
  -2   5   9    6.31    0.71 
   2   5  -9    6.11    0.56 
  -2  -5   9    5.57    0.51 
  -2   5   8   12.68    0.80 
  -2   5   8   14.11    0.81 
  -2   5   8   14.46    0.86 
  -2   5   8   13.70    0.83 
   2   5  -8   14.03    0.75 
  -2  -5   8   16.40    1.07 
  -2  -5   8   14.58    0.72 
  -2   5   7    4.18    0.53 
  -2   5   7    3.90    0.63 
  -2   5   7    4.03    0.56 
  -2   5   7    3.78    0.45 
   2   5  -7    4.60    0.45 
  -2  -5   7    4.30    0.65 
  -2  -5   7    3.82    0.41 
  -2   5   6   29.37    1.13 
  -2   5   6   32.55    1.55 
  -2   5   6   29.53    1.02 
   2   5  -6   31.02    1.07 
  -2   5   6   29.66    1.16 
  -2  -5   6   29.96    1.31 
  -2  -5   6   29.94    1.02 
  -2   5   5    6.64    0.41 
  -2   5   5    6.48    0.55 
   2   5  -5    6.80    0.51 
  -2   5   5    6.32    0.46 
  -2   5   5    6.06    0.54 
  -2  -5   5    6.30    0.61 
  -2  -5   5    6.39    0.64 
  -2  -5   5    5.97    0.45 
   2   5  -4    3.08    0.46 
  -2   5   4    1.96    0.41 
  -2   5   4    1.77    0.36 
  -2   5   4    1.95    0.29 
  -2  -5   4    1.87    0.33 
  -2  -5   4    1.23    0.38 
  -2   5   3    2.51    0.42 
   2   5  -3    3.53    0.44 
   2  -5  -3    2.68    0.47 
  -2  -5   3    1.58    0.37 
  -2  -5   3    2.06    0.48 
  -2  -5   3    2.85    0.41 
   2   5  -2  205.71    4.25 
  -2   5   2  203.39    4.28 
   2  -5  -2  206.09    4.27 
  -2  -5   2  199.68    4.17 
  -2  -5   2  201.43    4.23 
  -2  -5   2  201.51    4.24 
   2   5  -1   26.68    0.94 
  -2   5   1   26.40    0.71 
  -2   5   1   27.48    0.95 
  -2  -5   1   26.72    0.85 
  -2  -5   1   26.57    0.93 
   2  -5  -1   27.74    0.95 
   2  -5  -1   28.10    0.69 
  -2  -5   1   27.52    0.77 
  -2   5   0   11.03    0.57 
  -2   5   0   10.42    0.48 
   2   5   0   11.44    0.60 
   2  -5   0   11.22    0.44 
  -2  -5   0   11.21    0.60 
   2  -5   0   10.88    0.58 
  -2   5  -1   17.33    0.72 
   2   5   1   16.86    0.74 
  -2   5  -1   17.85    0.70 
   2  -5   1   17.75    0.72 
   2  -5   1   18.51    0.64 
  -2  -5  -1   17.76    0.75 
  -2   5  -2    4.63    0.49 
  -2   5  -2    4.25    0.37 
   2   5   2    3.97    0.44 
   2  -5   2    4.51    0.39 
   2  -5   2    4.56    0.41 
  -2  -5  -2    4.49    0.46 
   2   5   3    3.14    0.44 
   2   5   3    3.22    0.24 
  -2   5  -3    2.32    0.42 
  -2   5  -3    2.77    0.31 
  -2  -5  -3    4.01    0.47 
   2  -5   3    3.28    0.35 
  -2  -5  -3    2.48    0.29 
  -2   5  -4    2.46    0.45 
   2   5   4    2.98    0.44 
   2   5   4    3.22    0.27 
  -2   5  -4    3.51    0.36 
   2  -5   4    3.67    0.42 
   2  -5   4    2.74    0.32 
  -2  -5  -4    3.24    0.43 
  -2  -5  -4    2.51    0.36 
  -2   5  -5   74.74    1.75 
   2   5   5   76.89    1.81 
  -2   5  -5   72.41    2.31 
   2   5   5   74.91    2.00 
  -2  -5  -5   75.51    1.98 
   2  -5   5   79.90    2.16 
   2  -5   5   74.64    1.77 
  -2  -5  -5   74.52    1.98 
   2   5   6    1.72    0.36 
  -2   5  -6    1.27    0.49 
  -2   5  -6    1.70    0.28 
   2   5   6    1.30    0.26 
   2  -5   6    1.46    0.27 
  -2  -5  -6    2.04    0.43 
  -2  -5  -6    1.92    0.41 
   2   5   7    1.14    0.31 
  -2   5  -7    2.05    0.57 
  -2   5  -7    1.03    0.24 
   2   5   7    1.00    0.34 
   2   5   7    1.06    0.43 
   2  -5   7    0.99    0.25 
   2  -5   7    1.47    0.41 
  -2  -5  -7    1.55    0.43 
   2   5   8   31.81    1.22 
  -2   5  -8   32.94    0.95 
   2   5   8   32.08    1.20 
  -2   5  -8   32.22    1.67 
  -2  -5  -8   29.25    1.39 
   2  -5   8   31.65    0.94 
  -2   5  -9    5.37    0.41 
   2   5   9    6.54    0.62 
   2   5   9    5.84    0.60 
   2   5   9    5.45    0.57 
  -2   5  -9    7.98    1.13 
  -2  -5  -9    6.50    0.78 
   2  -5   9    6.13    0.42 
   2   5  10    2.73    0.55 
  -2   5 -10    3.72    0.84 
   2   5  10    3.23    0.55 
   2   5  10    4.03    0.63 
  -2  -5 -10    4.58    0.83 
  -2   5 -11   14.16    1.84 
   2   5  11   10.44    0.78 
  -2  -5 -11   10.68    1.07 
   2   5  12   12.18    0.86 
  -2   5 -12   11.19    1.33 
  -2  -5 -12   12.40    1.21 
  -2   5 -13    1.39    0.73 
   2   5  13    1.22    0.49 
  -2  -5 -13    0.68    0.60 
   2   5  14    2.34    0.56 
  -2   5 -14    0.53    0.64 
  -2  -5 -14    1.59    0.82 
  -2   5 -15    1.29    0.86 
   2   5  15    0.88    0.47 
  -2   5 -16    5.16    1.28 
   2   5  16    4.36    0.72 
   2   5  18    2.60    1.31 
  -2   6  19    1.11    0.73 
  -2   6  19   -0.08    0.95 
  -2   6  18    1.17    0.93 
  -2   6  18    1.50    0.71 
  -2   6  17    1.01    0.76 
   2   6 -17    0.87    0.62 
  -2   6  17    0.83    0.55 
  -2  -6  17    0.66    0.78 
  -2   6  16    5.05    1.07 
  -2   6  16    4.87    0.85 
   2   6 -16    6.38    0.77 
  -2  -6  16    5.82    1.37 
  -2   6  15    2.03    0.84 
  -2   6  15    0.81    0.57 
   2   6 -15    1.58    0.51 
  -2  -6  15    0.92    0.74 
   2   6 -14    0.30    0.41 
  -2   6  14   -0.05    0.45 
  -2   6  14   -0.38    0.48 
  -2  -6  14   -0.18    0.56 
   2   6 -13    5.28    0.71 
  -2   6  13    4.66    0.77 
  -2   6  13    5.19    0.90 
  -2  -6  13    4.68    1.04 
  -2   6  12    2.47    0.62 
   2   6 -12    3.02    0.56 
  -2   6  12    3.12    0.70 
  -2  -6  12    1.20    0.84 
  -2  -6  12    2.74    0.49 
  -2   6  11   10.40    0.89 
  -2   6  11    9.54    0.91 
   2   6 -11    9.47    0.72 
  -2   6  11    9.58    0.80 
  -2  -6  11   10.12    0.70 
  -2   6  10   22.80    1.26 
   2   6 -10   22.49    1.02 
  -2   6  10   20.94    1.15 
  -2   6  10   22.05    1.09 
  -2  -6  10   22.96    1.00 
  -2   6   9   20.96    1.12 
  -2   6   9   25.26    1.08 
  -2   6   9   23.01    1.12 
   2   6  -9   22.52    1.01 
  -2  -6   9   22.09    1.10 
  -2   6   8   27.22    1.09 
  -2   6   8   25.65    1.18 
  -2   6   8   27.36    1.22 
  -2   6   8   27.50    1.12 
  -2  -6   8   27.99    1.05 
  -2  -6   8   25.87    1.37 
  -2   6   7    0.07    0.25 
  -2   6   7    0.15    0.23 
  -2   6   7   -0.17    0.28 
  -2   6   7   -0.49    0.26 
   2   6  -7    0.77    0.33 
  -2  -6   7    0.46    0.27 
  -2   6   6    4.71    0.41 
  -2   6   6    4.62    0.54 
  -2   6   6    5.17    0.56 
  -2   6   6    4.18    0.37 
   2   6  -6    5.01    0.49 
  -2  -6   6    4.43    0.65 
  -2  -6   6    4.72    0.61 
  -2  -6   6    5.33    0.47 
  -2   6   5    8.61    0.62 
  -2   6   5    7.85    0.63 
   2   6  -5    8.80    0.59 
  -2  -6   5    8.07    0.54 
  -2  -6   5    7.99    0.70 
  -2   6   4  291.31    5.98 
   2   6  -4  289.14    5.87 
  -2  -6   4  281.34    5.81 
  -2  -6   4  284.42    6.03 
  -2  -6   4  277.81    6.02 
  -2   6   3    3.75    0.48 
   2   6  -3    4.05    0.48 
  -2  -6   3    3.69    0.47 
  -2  -6   3    3.04    0.45 
  -2  -6   3    3.46    0.44 
   2  -6  -3    3.12    0.41 
   2   6  -2    0.15    0.24 
  -2   6   2    0.24    0.25 
  -2  -6   2    0.05    0.22 
  -2  -6   2    0.27    0.25 
   2  -6  -2    0.55    0.29 
  -2  -6   2    0.37    0.24 
  -2   6   1   21.58    0.88 
   2   6  -1   21.97    0.90 
  -2  -6   1   23.13    0.78 
  -2  -6   1   21.82    0.88 
  -2  -6   1   22.15    0.67 
   2  -6  -1   22.05    0.89 
   2   6   0   58.15    1.64 
  -2   6   0   58.46    1.60 
  -2   6   0   56.76    1.44 
   2  -6   0   58.57    1.35 
  -2  -6   0   56.48    1.62 
   2  -6   0   58.83    1.60 
  -2   6  -1    1.45    0.31 
   2   6   1    1.63    0.33 
  -2   6  -1    1.49    0.32 
  -2  -6  -1    1.49    0.36 
   2  -6   1    1.41    0.24 
   2  -6   1    1.66    0.35 
  -2   6  -2   74.41    2.01 
  -2   6  -2   75.25    1.84 
   2   6   2   73.84    1.98 
   2  -6   2   75.78    1.88 
   2  -6   2   73.81    1.83 
  -2  -6  -2   72.51    1.96 
  -2   6  -3   13.00    0.78 
  -2   6  -3   12.89    0.59 
   2   6   3   11.34    0.68 
  -2  -6  -3   12.04    0.68 
   2  -6   3    9.11    0.57 
   2  -6   3   12.66    0.62 
  -2   6  -4   43.36    1.21 
   2   6   4   41.20    1.41 
  -2   6  -4   44.70    1.60 
  -2  -6  -4   41.92    1.38 
   2  -6   4   42.93    1.23 
   2  -6   4   39.40    1.35 
  -2   6  -5   62.93    2.16 
   2   6   5   60.98    1.90 
  -2   6  -5   62.29    1.59 
  -2  -6  -5   61.72    1.68 
   2  -6   5   61.83    1.87 
  -2  -6  -5   62.21    1.80 
   2  -6   5   62.46    1.60 
   2   6   6   -0.17    0.27 
  -2   6  -6   -0.05    0.21 
   2   6   6    0.33    0.18 
  -2   6  -6    0.06    0.36 
   2  -6   6    0.07    0.27 
   2  -6   6    0.16    0.23 
  -2  -6  -6    0.06    0.26 
  -2  -6  -6    0.20    0.40 
  -2   6  -7    2.08    0.59 
   2   6   7    2.34    0.35 
  -2   6  -7    2.69    0.38 
   2   6   7    2.73    0.49 
   2  -6   7    2.53    0.36 
  -2  -6  -7    3.53    0.55 
   2  -6   7    3.70    0.78 
   2   6   8    0.32    0.39 
   2   6   8   -0.23    0.28 
  -2   6  -8    0.25    0.39 
   2   6   8    0.65    0.28 
  -2   6  -8    0.80    0.28 
  -2  -6  -8    0.00    0.38 
   2  -6   8    0.38    0.26 
   2   6   9    2.96    0.55 
  -2   6  -9    2.42    0.38 
   2   6   9    2.71    0.50 
  -2   6  -9    3.38    0.79 
   2  -6   9    2.86    0.38 
  -2  -6  -9    2.75    0.63 
   2   6  10    3.47    0.52 
   2   6  10    2.26    0.52 
  -2   6 -10    2.86    0.38 
  -2   6 -10    2.16    0.77 
  -2  -6 -10    2.47    0.64 
   2   6  11    2.90    0.58 
  -2   6 -11    3.89    1.01 
  -2  -6 -11    2.61    0.71 
   2   6  12    5.54    0.75 
  -2   6 -12    6.95    1.36 
  -2  -6 -12    7.12    1.06 
  -2   6 -13    8.81    1.51 
   2   6  13    7.46    0.81 
  -2  -6 -13    8.71    1.24 
  -2   6 -14    0.30    0.66 
   2   6  14    0.12    0.45 
  -2   6 -15    7.92    1.60 
   2   6  15   10.11    1.49 
   2   6  15    7.25    0.89 
  -2   6 -16    2.72    0.96 
   2   6  16    2.07    0.95 
   2   6  16    2.24    0.66 
   2   6  17    4.87    1.57 
   2   6  18    0.21    1.16 
  -2   7  19   19.83    1.84 
  -2   7  19   18.36    1.42 
  -2   7  18    1.19    0.71 
  -2   7  18    0.05    0.80 
   2   7 -17    9.27    1.17 
  -2   7  17    9.16    1.02 
  -2   7  17    7.93    1.25 
  -2  -7  17    7.03    1.50 
  -2   7  16    0.13    0.63 
   2   7 -16    0.76    0.55 
  -2   7  16    0.34    0.50 
  -2  -7  16    0.21    0.83 
  -2   7  15    6.26    0.99 
   2   7 -15    4.97    0.74 
  -2   7  15    3.52    0.78 
  -2  -7  15    2.87    1.08 
   2   7 -14    3.44    0.65 
  -2   7  14    4.74    0.86 
  -2   7  14    3.40    0.71 
  -2  -7  14    3.46    1.01 
   2   7 -13   38.36    1.47 
  -2   7  13   40.45    1.83 
  -2  -7  13   40.77    2.37 
   2   7 -12    0.96    0.45 
  -2   7  12    2.24    0.58 
  -2   7  12    1.07    0.53 
  -2   7  12    2.25    0.50 
  -2  -7  12    1.09    0.65 
   2   7 -11   23.76    1.12 
  -2   7  11   24.77    1.32 
  -2   7  11   26.76    1.32 
  -2   7  11   23.58    1.27 
  -2  -7  11   26.29    1.74 
  -2  -7  11   26.48    1.15 
  -2   7  10    0.86    0.31 
  -2   7  10   -0.13    0.41 
   2   7 -10   -0.17    0.30 
  -2   7  10    0.42    0.36 
  -2  -7  10    0.71    0.58 
  -2  -7  10    1.28    0.38 
  -2   7   9    2.52    0.47 
  -2   7   9    2.84    0.57 
  -2   7   9    3.48    0.48 
   2   7  -9    2.97    0.54 
  -2  -7   9    3.08    0.52 
  -2  -7   9    2.26    0.66 
  -2   7   8    6.47    0.55 
   2   7  -8    6.83    0.63 
  -2   7   8    6.32    0.70 
  -2   7   8    6.39    0.52 
  -2  -7   8    6.41    0.88 
  -2  -7   8    5.89    0.86 
  -2  -7   8    5.58    0.55 
  -2   7   7   31.31    0.99 
   2   7  -7   30.52    1.19 
  -2   7   7   31.22    1.33 
  -2  -7   7   29.19    1.49 
  -2  -7   7   32.58    1.47 
  -2   7   6   56.86    1.84 
   2   7  -6   57.62    1.71 
  -2   7   6   53.88    1.78 
  -2  -7   6   56.24    1.85 
  -2  -7   6   53.92    2.24 
   2   7  -5   46.53    1.69 
  -2   7   5   44.65    1.56 
  -2  -7   5   46.32    1.62 
  -2  -7   5   44.70    1.43 
  -2  -7   5   47.40    1.68 
  -2   7   4    1.69    0.37 
  -2  -7   4    2.24    0.44 
   2  -7  -4    1.94    0.42 
  -2  -7   4    2.09    0.37 
  -2  -7   4    2.05    0.40 
  -2   7   3    5.77    0.53 
   2  -7  -3    5.38    0.60 
  -2  -7   3    5.47    0.49 
  -2  -7   3    5.36    0.49 
  -2  -7   3    5.13    0.48 
   2   7  -2   11.33    0.80 
  -2  -7   2   10.34    0.63 
   2  -7  -2   10.09    0.65 
  -2  -7   2   10.03    0.53 
  -2  -7   2    9.76    0.57 
  -2   7   1    8.78    0.61 
  -2  -7   1    9.02    0.61 
   2  -7  -1    9.46    0.63 
  -2   7   0    0.94    0.24 
  -2   7   0    1.74    0.35 
  -2  -7   0    1.01    0.31 
   2  -7   0    1.30    0.21 
   2  -7   0    1.26    0.34 
  -2   7  -1   42.73    1.33 
  -2   7  -1   48.34    1.40 
   2   7   1   45.28    1.49 
  -2  -7  -1   43.12    1.44 
   2  -7   1   46.07    1.41 
  -2   7  -2   26.83    1.08 
  -2   7  -2   27.28    0.99 
   2   7   2   29.01    1.12 
   2  -7   2   27.00    0.92 
   2  -7   2   26.70    1.01 
  -2  -7  -2   28.47    1.60 
  -2   7  -3   41.70    1.52 
   2   7   3   43.14    1.46 
  -2   7  -3   44.03    1.32 
  -2  -7  -3   44.67    1.54 
   2  -7   3   44.29    1.34 
   2  -7   3   42.49    1.33 
   2   7   4   15.79    0.86 
  -2   7  -4   15.69    0.72 
  -2   7  -4   16.23    0.98 
   2  -7   4   15.63    0.74 
  -2  -7  -4   15.44    0.84 
   2   7   5   27.99    1.18 
  -2   7  -5   28.91    1.00 
  -2   7  -5   27.47    1.39 
  -2  -7  -5   25.44    1.11 
   2  -7   5   27.56    1.00 
   2  -7   5   27.72    1.16 
  -2   7  -6    1.51    0.35 
   2   7   6    1.27    0.43 
  -2   7  -6    1.21    0.53 
   2   7   6    1.60    0.27 
   2  -7   6    1.92    0.37 
   2  -7   6    1.42    0.39 
  -2  -7  -6    1.46    0.36 
  -2  -7  -6    2.72    0.55 
   2   7   7   46.93    1.35 
  -2   7  -7   46.03    2.03 
   2   7   7   47.78    1.67 
  -2   7  -7   48.29    1.40 
   2  -7   7   47.53    1.39 
  -2  -7  -7   47.48    1.59 
   2   7   8    0.32    0.22 
   2   7   8    0.42    0.36 
  -2   7  -8   -0.02    0.27 
  -2   7  -8   -0.16    0.46 
  -2  -7  -8   -0.02    0.37 
   2  -7   8    0.28    0.29 
  -2   7  -9   30.64    1.81 
   2   7   9   28.55    1.31 
   2   7   9   29.55    1.12 
  -2   7  -9   30.07    1.03 
   2  -7   9   29.96    1.03 
  -2  -7  -9   25.09    1.68 
   2   7  10    1.12    0.49 
   2   7  10    0.87    0.31 
  -2   7 -10    0.68    0.30 
  -2   7 -10    0.99    0.60 
   2  -7  10    1.05    0.31 
  -2  -7 -10    0.61    0.46 
  -2   7 -11    3.91    0.99 
   2   7  11    2.73    0.61 
  -2  -7 -11    4.23    0.78 
   2  -7  11    4.94    0.46 
   2   7  12    7.27    0.80 
  -2   7 -12    6.94    1.29 
   2   7  13   12.06    0.98 
  -2   7 -13   12.08    1.44 
   2   7  14    0.35    0.58 
  -2   7 -14    1.24    0.83 
   2   7  15   -0.26    0.51 
   2   7  15    0.85    0.75 
  -2   7 -15    0.44    0.74 
   2   7  16    1.66    0.91 
   2   7  16    1.14    0.62 
   2   7  17   -1.22    0.91 
   2   7  18    6.15    1.84 
  -2   8  18   -0.88    1.03 
  -2   8  18    0.86    0.72 
  -2   8  17    1.58    0.63 
  -2   8  17    1.33    0.79 
  -2   8  16    9.23    1.22 
  -2   8  16    5.13    0.93 
   2   8 -16    8.45    1.01 
  -2  -8  16    5.91    1.31 
  -2   8  15    0.65    0.52 
  -2   8  15    1.15    0.62 
   2   8 -15    0.61    0.51 
  -2  -8  15   -0.34    0.73 
   2   8 -14    8.16    0.80 
  -2   8  14    9.51    0.98 
  -2   8  14    7.71    0.96 
  -2  -8  14    8.51    1.40 
  -2   8  13    4.12    0.79 
  -2   8  13    5.09    0.78 
   2   8 -13    5.69    0.67 
  -2  -8  13    4.68    1.17 
   2   8 -12   25.01    1.19 
  -2   8  12   20.19    1.31 
  -2   8  12   23.40    1.24 
  -2   8  12   23.19    1.10 
  -2  -8  12   23.79    1.81 
  -2   8  11    1.52    0.56 
   2   8 -11    1.80    0.54 
  -2   8  11    2.27    0.42 
  -2   8  11    1.98    0.71 
  -2  -8  11    2.29    0.77 
  -2   8  10    0.14    0.41 
   2   8 -10    0.51    0.37 
  -2   8  10    0.60    0.28 
  -2   8  10    0.72    0.34 
  -2  -8  10    1.12    0.57 
  -2   8   9    4.05    0.67 
  -2   8   9    3.58    0.45 
  -2   8   9    4.02    0.50 
   2   8  -9    3.98    0.67 
  -2  -8   9    3.49    0.78 
   2   8  -8   29.68    1.25 
  -2   8   8   29.76    1.39 
  -2  -8   8   26.75    1.55 
  -2  -8   8   30.35    1.20 
  -2   8   7   26.99    1.28 
   2   8  -7   27.17    1.16 
  -2  -8   7   21.85    1.21 
  -2  -8   7   27.21    1.13 
  -2  -8   7   25.72    1.40 
  -2   8   6    5.47    0.64 
   2   8  -6    5.28    0.58 
  -2  -8   6    6.57    0.84 
  -2  -8   6    5.41    0.65 
  -2  -8   6    5.65    0.57 
  -2   8   5    6.67    0.65 
   2   8  -5    6.69    0.62 
  -2  -8   5    7.39    0.71 
  -2  -8   5    7.08    0.61 
  -2  -8   5    6.88    0.65 
   2   8  -4   32.17    1.24 
  -2   8   4   31.71    1.30 
  -2  -8   4   33.39    1.25 
  -2  -8   4   30.66    1.23 
   2  -8  -4   34.08    1.35 
  -2  -8   4   31.39    1.21 
  -2   8   3   67.81    2.03 
   2   8  -3   70.60    2.00 
   2  -8  -3   65.30    1.99 
  -2  -8   3   67.32    1.85 
  -2  -8   3   69.43    1.87 
  -2  -8   3   67.47    1.96 
  -2   8   2    0.69    0.31 
   2   8  -2    1.09    0.38 
  -2  -8   2    0.89    0.24 
  -2  -8   2    1.53    0.38 
   2  -8  -2    1.12    0.32 
  -2  -8   2    1.12    0.26 
  -2   8   1   37.20    1.35 
   2   8  -1   39.35    1.39 
   2  -8  -1   38.81    1.38 
  -2  -8   1   39.14    1.37 
   2   8   0    3.94    0.55 
  -2   8   0    3.88    0.52 
  -2  -8   0    3.88    0.46 
  -2   8  -1    3.19    0.47 
  -2   8  -1    2.10    0.36 
   2   8   1    2.44    0.45 
   2  -8   1    2.56    0.44 
   2  -8   1    2.46    0.28 
  -2  -8  -1    2.94    0.48 
   2   8   2    5.48    0.56 
  -2   8  -2    5.97    0.58 
  -2  -8  -2    5.19    0.55 
   2  -8   2    5.50    0.42 
   2  -8   2    5.49    0.53 
  -2   8  -3   52.75    1.79 
   2   8   3   52.88    1.75 
  -2   8  -3   58.35    1.84 
  -2  -8  -3   52.49    1.73 
   2  -8   3   53.03    1.63 
   2  -8   3   53.23    1.56 
  -2   8  -4   30.82    1.14 
   2   8   4   30.11    1.28 
  -2   8  -4   30.70    1.39 
   2  -8   4   31.83    1.17 
   2  -8   4   29.77    1.14 
  -2   8  -5    8.57    0.84 
  -2   8  -5    9.14    0.62 
   2   8   5    7.75    0.71 
   2  -8   5    9.32    0.64 
  -2   8  -6   -0.15    0.47 
   2   8   6    0.13    0.36 
  -2   8  -6   -0.17    0.27 
   2  -8   6   -0.42    0.28 
   2  -8   6   -0.46    0.27 
  -2   8  -7    4.37    0.56 
   2   8   7    3.08    0.59 
  -2   8  -7    2.87    0.76 
   2  -8   7    2.69    0.45 
   2   8   8   49.79    1.43 
   2   8   8   51.69    1.86 
  -2   8  -8   51.46    2.31 
  -2   8  -8   51.43    1.54 
   2  -8   8   51.27    1.54 
   2   8   9   10.12    0.63 
  -2   8  -9   10.15    1.18 
   2   8   9   12.29    0.94 
  -2   8  -9   11.18    0.68 
   2  -8   9   12.12    0.69 
   2   8  10    3.54    0.68 
  -2   8 -10    3.27    0.49 
   2  -8  10    2.93    0.44 
   2   8  11   10.30    0.92 
  -2   8 -11   10.27    0.64 
   2   8  11   10.64    0.75 
  -2   8 -11   12.24    1.66 
   2  -8  11   12.04    0.68 
  -2   8 -12    1.54    0.87 
   2   8  12    0.52    0.54 
   2   8  13    2.69    0.65 
  -2   8 -13    2.97    0.99 
   2   8  13    3.34    0.86 
   2   8  14    0.26    0.51 
   2   8  14    0.70    0.66 
  -2   8 -15    7.02    1.44 
   2   8  15    3.81    0.73 
   2   8  15    5.16    1.09 
   2   8  16    0.72    0.88 
   2   8  16    0.24    0.62 
  -2   9  17   10.89    1.16 
  -2   9  16    0.61    0.67 
   2   9 -16   -0.84    0.69 
  -2  -9  16    0.12    0.86 
  -2   9  15    7.35    0.99 
   2   9 -15    5.56    0.93 
  -2   9  15    5.96    0.91 
  -2  -9  15    7.89    2.33 
   2   9 -14   28.43    1.38 
  -2   9  14   30.21    1.48 
  -2   9  14   29.48    1.64 
  -2  -9  14   30.88    2.22 
  -2   9  13    0.63    0.49 
  -2   9  13    0.88    0.42 
   2   9 -13    0.55    0.49 
  -2  -9  13    0.26    0.70 
  -2   9  12    0.80    0.41 
   2   9 -12    0.92    0.48 
  -2   9  12    0.26    0.47 
  -2  -9  12   -0.72    0.62 
  -2   9  11    9.62    0.62 
   2   9 -11    9.44    0.81 
  -2   9  11    7.69    0.90 
  -2   9  11    7.11    0.64 
  -2  -9  11    9.13    1.56 
   2   9 -10  102.65    2.83 
  -2  -9  10  102.80    3.59 
   2   9  -9    1.23    0.45 
  -2   9   9    0.53    0.43 
  -2  -9   9    1.03    0.67 
  -2   9   8    1.37    0.47 
   2   9  -8    2.22    0.53 
  -2  -9   8    2.21    0.64 
   2   9  -7   12.54    0.86 
  -2   9   7   14.29    1.00 
  -2  -9   7   12.49    1.03 
  -2  -9   7   10.69    0.88 
  -2   9   6   -0.24    0.32 
   2   9  -6   -0.18    0.33 
  -2  -9   6    0.12    0.38 
  -2   9   5   31.69    1.40 
   2   9  -5   33.59    1.35 
  -2  -9   5   32.83    1.39 
  -2  -9   5   35.53    1.37 
   2   9  -4    9.06    0.72 
  -2   9   4    7.86    0.73 
  -2  -9   4    7.86    0.63 
  -2  -9   4    7.93    0.67 
  -2   9   3   38.06    1.48 
   2   9  -3   39.86    1.46 
  -2  -9   3   36.67    1.24 
  -2  -9   3   39.22    1.27 
   2   9  -2    0.10    0.32 
  -2   9   2    0.07    0.31 
   2   9  -1   24.02    1.12 
  -2   9   1   24.70    1.12 
   2  -9  -1   25.80    1.33 
  -2   9   0    1.60    0.42 
   2   9   0    1.47    0.42 
   2  -9   0    1.85    0.47 
   2   9   1   14.30    0.88 
  -2   9  -1   13.85    0.80 
  -2   9  -1   12.92    0.72 
   2  -9   1   14.48    0.84 
   2  -9   1   13.73    0.58 
   2   9   2   23.79    1.13 
  -2   9  -2   22.12    1.05 
  -2   9  -2   22.81    1.02 
   2  -9   2   23.07    0.85 
   2  -9   2   22.51    1.05 
  -2   9  -3  118.13    3.11 
   2   9   3  112.88    3.06 
  -2   9  -3  119.46    2.92 
   2  -9   3  115.84    2.93 
   2  -9   3  114.56    2.75 
  -2   9  -4   24.22    1.30 
  -2   9  -4   23.67    1.03 
   2   9   4   21.76    1.15 
   2  -9   4   22.64    1.05 
   2  -9   4   22.70    1.00 
  -2   9  -5   15.71    1.13 
   2   9   5   17.29    1.05 
  -2   9  -5   17.64    0.89 
   2  -9   5   17.34    0.90 
   2  -9   5   16.77    0.92 
   2   9   6  139.88    3.64 
  -2   9  -6  142.18    4.00 
  -2   9  -6  135.50    3.29 
   2  -9   6  139.29    3.33 
   2   9   7    1.61    0.53 
  -2   9  -7    2.58    0.47 
  -2   9  -7    2.12    0.65 
   2  -9   7    1.73    0.44 
   2   9   8    0.61    0.48 
  -2   9  -8    2.32    0.76 
  -2   9  -8    1.64    0.43 
   2  -9   8    3.26    0.50 
  -2   9  -9    7.86    0.66 
  -2   9  -9    9.91    1.30 
   2   9   9    8.58    0.88 
   2  -9   9    8.90    0.76 
  -2   9 -10   15.94    1.48 
   2   9  10   20.10    1.96 
   2   9  10   14.85    1.01 
   2   9  10   15.22    0.78 
  -2   9 -10   15.61    0.85 
   2  -9  10   16.61    1.26 
  -2   9 -11    4.81    0.57 
   2   9  11    5.71    0.59 
   2   9  11    5.76    0.83 
  -2   9 -11    5.38    1.19 
   2   9  11    5.09    0.77 
  -2   9 -12    1.36    0.87 
   2   9  12    1.37    0.57 
   2   9  12    3.80    0.75 
  -2   9 -13    1.07    0.77 
   2   9  13   -1.19    0.57 
   2   9  13    0.40    0.56 
   2   9  14    0.69    0.58 
  -2   9 -14    0.53    0.72 
   2   9  14    1.09    0.72 
   2   9  15    1.49    0.88 
   2   9  15    0.35    0.65 
   2   9  16    0.60    0.72 
  -2  10  16    7.79    1.13 
   2  10 -15    5.18    1.28 
  -2 -10  15    5.15    1.29 
   2  10 -14    7.18    0.90 
  -2  10  14    6.59    0.98 
  -2  10  14    6.40    0.76 
  -2 -10  14    6.02    1.26 
  -2  10  13    0.45    0.56 
   2  10 -13    0.81    0.50 
  -2 -10  13   -0.34    0.70 
  -2  10  12    0.38    0.61 
   2  10 -12    0.58    0.50 
  -2 -10  12    0.93    0.74 
  -2  10  11    1.06    0.57 
   2  10 -11    1.37    0.50 
  -2 -10  11    2.10    0.76 
   2  10 -10    2.51    0.58 
  -2  10  10    1.55    0.62 
  -2 -10  10    2.76    0.80 
   2  10  -9   22.94    1.20 
  -2  10   9   23.23    1.36 
  -2 -10   9   23.62    1.55 
  -2  10   8   11.14    1.16 
   2  10  -8   11.58    0.87 
  -2 -10   8   10.55    1.07 
  -2  10   7    9.41    0.89 
   2  10  -7    9.21    0.80 
  -2 -10   7    9.05    0.93 
  -2 -10   7    8.90    0.99 
  -2  10   6    2.81    0.62 
   2  10  -6    3.37    0.62 
  -2 -10   6    2.52    0.59 
  -2 -10   6    2.71    0.54 
   2  10  -5    1.25    0.46 
  -2  10   5    1.61    0.54 
  -2 -10   5    1.74    0.41 
  -2 -10   5    0.79    0.44 
   2  10  -4    6.24    0.75 
  -2  10   4    5.46    0.75 
  -2 -10   4    5.43    0.60 
  -2 -10   4    5.34    0.55 
   2  10  -3    1.07    0.44 
  -2  10   3    1.35    0.48 
  -2 -10   3    1.51    0.34 
  -2 -10   3    1.89    0.38 
   2  10  -2   29.37    1.31 
  -2  10   2   30.29    1.34 
   2  10  -1   11.05    0.83 
  -2  10   1   10.65    0.81 
   2  10   0    9.73    0.81 
  -2  10   0   10.06    0.78 
   2  10   1    7.19    0.72 
  -2  10  -1    7.81    0.69 
   2  10   2    1.55    0.49 
  -2  10  -2    1.81    0.49 
  -2  10  -2    1.09    0.39 
   2 -10   2    1.24    0.28 
  -2  10  -3   10.71    0.77 
  -2  10  -3   11.32    0.87 
   2  10   3   11.09    0.87 
   2 -10   3   11.09    0.63 
   2  10   4    3.35    0.62 
  -2  10  -4    3.01    0.52 
   2 -10   4    3.53    0.51 
   2  10   5   22.59    1.25 
  -2  10  -5   23.84    1.37 
  -2  10  -5   23.46    1.08 
   2 -10   5   22.72    1.07 
  -2  10  -6   12.61    1.12 
  -2  10  -6   10.36    0.77 
   2  10   6   11.80    0.96 
   2  10   7   28.13    1.45 
  -2  10  -7   32.35    1.79 
  -2  10  -7   30.55    1.25 
  -2  10  -8    0.32    0.56 
  -2  10  -8    0.24    0.33 
  -2  10  -9    0.12    0.35 
   2  10   9   -0.10    0.41 
  -2  10  -9   -0.02    0.58 
   2 -10   9    0.03    0.48 
  -2  10 -10   15.74    0.90 
  -2  10 -10   14.05    1.46 
   2  10  10   15.17    1.13 
   2 -10  10   14.52    0.95 
   2  10  11    0.10    0.45 
  -2  10 -11    0.54    0.60 
  -2  10 -11    0.42    0.38 
   2  10  12    0.11    0.51 
  -2  10 -12   -1.07    0.39 
   2  10  12    0.60    0.52 
  -2  10 -12   -0.15    0.71 
   2  10  13    1.77    0.69 
  -2  10 -13    5.25    1.64 
   2  10  13    3.35    0.77 
   2  10  14    2.49    0.75 
   2  10  16    2.67    0.83 
  -2  11  15    3.04    0.90 
   2  11 -15    2.43    0.87 
  -2 -11  15    3.41    1.17 
  -2  11  14    2.28    0.85 
   2  11 -14    2.33    0.74 
  -2  11  13    3.52    0.87 
   2  11 -13    2.26    0.67 
  -2 -11  13    2.13    0.96 
  -2  11  12    0.82    0.64 
  -2 -11  12    1.70    0.87 
   2  11 -11    0.96    0.51 
  -2  11  11    1.22    0.58 
  -2 -11  11    0.75    0.70 
   2  11 -10    0.76    0.50 
  -2  11  10    0.55    0.51 
  -2  11   9   25.86    1.48 
   2  11  -9   24.01    1.29 
  -2 -11   9   25.45    1.64 
   2  11  -8    1.61    0.47 
  -2  11   8    1.78    0.64 
  -2 -11   8    2.60    0.70 
   2  11  -7   11.43    0.91 
  -2  11   7   11.66    1.01 
  -2 -11   7   11.48    1.00 
  -2  11   6    0.84    0.88 
   2  11  -6    0.96    0.48 
  -2 -11   6    0.53    0.47 
  -2 -11   6    1.07    0.41 
   2  11  -5    3.78    0.72 
  -2  11   5    3.11    0.62 
  -2 -11   5    3.29    0.53 
   2  11  -4   10.77    0.87 
  -2  11   4   11.30    0.93 
  -2 -11   4   10.27    0.67 
  -2 -11   4   10.73    0.73 
  -2  11   3   -0.43    0.32 
   2  11  -3   -0.01    0.37 
  -2 -11   3   -0.05    0.23 
  -2  11   2   52.58    1.90 
   2  11  -2   48.36    1.84 
  -2  11   1   11.91    0.90 
   2  11  -1   11.19    0.90 
   2  11   0    0.38    0.39 
  -2  11   0    0.13    0.38 
  -2  11  -1    3.72    0.63 
   2  11   1    3.03    0.63 
   2  11   2    1.04    0.47 
  -2  11  -2    1.20    0.45 
   2 -11   2    1.30    0.31 
  -2  11  -3   18.09    1.03 
   2  11   3   17.95    1.13 
  -2  11  -3   16.24    1.02 
   2 -11   3   19.08    0.84 
  -2  11  -4   19.71    1.19 
  -2  11  -4   20.11    1.05 
   2  11   4   19.21    1.16 
   2 -11   4   17.41    0.98 
  -2  11  -5   18.30    1.01 
  -2  11  -5   17.42    1.22 
   2 -11   5   18.25    0.95 
  -2  11  -6    0.00    0.35 
  -2  11  -6    0.34    0.50 
   2  11   6    0.25    0.44 
  -2  11  -7   10.46    0.81 
  -2  11  -7    9.80    1.12 
   2  11   7    8.96    0.94 
  -2  11  -8   11.44    1.24 
   2  11   8    9.31    0.98 
  -2  11  -8   12.21    0.86 
  -2  11  -9   13.60    1.39 
  -2  11  -9   14.29    0.91 
   2  11   9   13.60    1.11 
   2  11  10    4.98    0.84 
  -2  11 -10    4.38    1.00 
  -2  11 -10    5.19    0.69 
  -2  11 -11    0.56    0.53 
  -2  11 -11    0.49    0.67 
   2  11  11   -0.23    0.52 
  -2  11 -12    1.89    0.67 
   2  11  12    2.53    0.76 
   2  11  13   -0.38    0.58 
   2  11  14    3.64    0.82 
   2  11  15    2.77    0.86 
  -2  12  14    1.12    0.73 
   2  12 -14   -0.41    0.72 
  -2 -12  14    0.06    0.91 
  -2  12  13   -0.04    0.59 
   2  12 -13    0.38    0.65 
  -2 -12  13    0.89    0.88 
  -2  12  12    4.10    1.07 
   2  12 -12    3.06    0.74 
  -2 -12  12    4.29    1.11 
  -2  12  11    0.61    0.55 
   2  12 -11    1.44    0.56 
  -2 -12  11    1.44    0.75 
  -2  12  10    0.98    0.58 
   2  12 -10    1.48    0.55 
  -2 -12  10    2.44    0.80 
  -2  12   9    1.36    0.61 
   2  12  -9    1.35    0.51 
  -2 -12   9    1.85    0.68 
   2  12  -8    7.26    1.11 
  -2  12   8    5.69    0.89 
  -2 -12   8    7.57    1.04 
  -2  12   7   29.10    1.57 
  -2 -12   7   31.12    1.55 
   2  12  -6   25.09    1.54 
  -2  12   6   23.74    1.42 
  -2 -12   6   24.93    1.29 
  -2 -12   6   26.35    1.25 
  -2  12   5    3.20    0.66 
   2  12  -5    3.06    0.65 
  -2 -12   5    3.76    0.55 
  -2 -12   5    3.01    0.85 
  -2  12   4   21.94    1.30 
   2  12  -4   21.82    1.24 
  -2 -12   4   21.04    0.92 
  -2 -12   4   21.62    0.97 
   2  12  -3    3.41    0.66 
  -2  12   2   -0.81    0.31 
   2  12  -2   -0.05    0.41 
  -2  12   1    6.84    0.77 
   2  12  -1    7.51    1.01 
  -2  12   0   60.11    2.14 
   2  12   0   67.41    3.21 
   2  12   1    1.27    0.65 
  -2  12  -1    1.20    0.49 
   2  12   2    7.17    0.82 
  -2  12  -2    7.41    0.77 
  -2  12  -3    7.42    0.77 
   2  12   3    7.11    0.82 
   2 -12   3    6.23    0.54 
   2  12   4   13.95    1.07 
  -2  12  -4   13.48    0.93 
  -2  12  -5    8.62    0.82 
   2  12   5    9.22    0.92 
   2 -12   5    9.41    0.76 
   2  12   6    8.92    0.93 
  -2  12  -6    8.77    0.81 
  -2  12  -7    0.60    0.45 
   2  12   7    0.08    0.49 
  -2  12  -8    0.06    0.43 
   2  12   8   -0.29    0.44 
   2  12   9    5.44    0.89 
  -2  12  -9    4.79    0.72 
  -2  12 -10   16.66    1.09 
   2  12  10   17.00    1.31 
   2  12  11    9.84    1.08 
  -2  12 -11    5.51    0.82 
   2  12  12    3.58    0.95 
   2  12  13    0.16    0.63 
   2 -12  13    1.16    1.04 
   2  13 -14    0.46    0.97 
  -2 -13  14    1.39    1.29 
   2  13 -13    4.29    0.93 
  -2 -13  13    6.82    1.68 
   2  13 -12    1.79    0.69 
  -2  13  12    1.80    0.72 
  -2 -13  12    2.07    1.05 
  -2  13  11   15.65    1.36 
   2  13 -11   15.35    1.21 
  -2 -13  11   17.88    1.61 
  -2  13  10    1.08    0.59 
   2  13 -10    0.27    0.55 
  -2 -13  10    1.08    0.73 
  -2  13   9    0.93    0.57 
   2  13  -9    1.11    0.52 
  -2 -13   9    2.00    0.75 
  -2  13   8    4.79    0.88 
   2  13  -8    5.50    0.81 
  -2 -13   8    7.60    1.07 
   2  13  -7    9.70    0.98 
  -2  13   7    9.92    1.02 
  -2 -13   7   11.34    1.00 
  -2  13   6    3.22    0.71 
   2  13  -6    3.67    0.75 
  -2 -13   6    5.05    0.70 
  -2 -13   6    4.65    0.70 
   2  13  -5    0.28    0.47 
  -2  13   5    1.28    0.56 
  -2 -13   5    1.22    0.45 
  -2  13   4    5.68    0.88 
   2  13  -4    4.66    0.82 
   2  13  -3   10.96    0.99 
  -2  13   3    9.74    0.94 
  -2  13   2   10.56    0.96 
   2  13  -2    8.30    0.88 
   2  13  -1    1.43    0.56 
  -2  13   1    0.92    0.47 
   2  13   0   -0.57    0.37 
  -2  13   0    0.73    0.46 
  -2  13  -1    0.59    0.44 
   2  13   1    0.24    0.48 
  -2  13  -2    0.06    0.39 
   2  13   2   -0.20    0.40 
   2  13   3   24.36    1.42 
  -2  13  -3   25.64    1.72 
   2 -13   3   24.47    1.19 
   2  13   4    3.34    0.69 
   2 -13   4    3.00    0.65 
   2  13   5    1.32    0.55 
   2 -13   5    0.61    0.58 
   2  13   6    9.67    1.03 
   2 -13   6   12.02    1.15 
   2  13   7    0.17    0.48 
   2  13   8   20.51    1.41 
   2  13   9    6.08    0.93 
   2 -13   9   10.15    1.48 
   2  13  10    0.05    0.59 
   2 -13  10    1.91    1.02 
   2  13  11    1.26    0.68 
  -2  13 -11   -0.74    1.35 
   2 -13  11    0.70    0.95 
   2  13  12    2.01    0.90 
   2 -13  12    3.61    1.33 
   2  14 -13    0.22    0.93 
  -2 -14  13    1.45    1.11 
   2  14 -12    0.01    0.70 
  -2 -14  12    0.22    1.02 
   2  14 -11    0.36    0.69 
  -2  14  11    1.24    0.81 
  -2 -14  11    1.47    1.00 
   2  14 -10    7.44    1.06 
  -2  14  10    6.87    1.04 
  -2 -14  10   10.01    1.35 
  -2  14   9    0.30    0.53 
   2  14  -9    1.04    0.58 
  -2 -14   9    0.90    0.77 
   2  14  -8   11.87    1.09 
  -2  14   8   11.38    1.70 
  -2 -14   8   10.71    1.17 
   2  14  -7    0.53    0.50 
  -2  14   7   -0.63    0.44 
  -2 -14   7   -0.74    0.53 
  -2  14   6   14.02    1.21 
   2  14  -6   14.16    1.17 
  -2 -14   6   14.87    1.00 
   2  14  -5   17.75    1.25 
  -2  14   5   20.28    1.38 
  -2  14   4   36.61    1.82 
   2  14  -4   39.24    1.79 
  -2  14   3    1.36    0.53 
   2  14  -3    1.68    0.57 
   2  14  -2    1.39    0.55 
  -2  14   2    0.87    0.49 
   2  14  -1    5.99    0.89 
  -2  14   1    6.67    0.88 
   2  14   0    2.51    0.66 
  -2  14   0    2.55    0.66 
   2  14   1    1.16    0.54 
  -2  14  -1   -0.19    0.42 
  -2  14  -2   -0.50    0.42 
   2  14   2   -0.14    0.49 
  -2  14  -3    1.15    0.54 
   2  14   3    0.64    0.51 
  -2  14  -4    7.54    0.97 
   2  14   4    8.74    0.99 
   2 -14   4    7.51    0.91 
  -2  14  -5    0.59    0.51 
   2  14   5   -0.20    0.51 
   2 -14   5    0.72    0.59 
  -2  14  -6    0.28    0.53 
   2  14   6    0.63    0.53 
   2 -14   6   -0.56    0.61 
  -2  14  -7    3.72    0.75 
   2  14   7    4.05    0.89 
   2 -14   7    4.28    1.04 
   2  14   8   -0.20    0.56 
  -2  14  -8    0.04    0.59 
   2 -14   8    0.12    0.88 
  -2  14  -9    5.70    0.87 
   2  14   9    5.54    0.98 
   2 -14   9    7.66    1.42 
  -2  14 -10    3.83    0.88 
   2  14  10    5.15    1.00 
   2 -14  10    5.76    1.41 
   2 -14  11    0.15    1.53 
   2 -14  12    7.49    1.81 
   2  15 -12    0.83    0.91 
  -2 -15  12    1.48    1.34 
   2  15 -11    0.26    0.85 
  -2 -15  11    2.24    1.16 
  -2 -15  10    1.78    1.01 
   2  15  -9    0.99    0.61 
  -2 -15   9   -0.33    0.84 
   2  15  -8    6.10    0.98 
  -2  15   8    5.54    0.98 
  -2 -15   8    7.18    1.10 
  -2  15   7    2.09    0.74 
   2  15  -7    2.16    0.74 
  -2 -15   7    1.68    0.68 
   2  15  -6   10.31    1.09 
  -2  15   6    8.86    1.29 
  -2  15   5    9.61    1.27 
   2  15  -5    7.36    1.02 
   2  15  -4    7.38    1.05 
  -2  15   4    6.26    0.92 
   2  15  -3    2.38    0.71 
  -2  15   3    1.71    0.65 
   2  15  -2    4.15    0.82 
  -2  15   2    2.54    0.66 
  -2  15   1    0.16    0.50 
   2  15  -1    0.38    0.51 
   2  15   0    3.07    0.77 
  -2  15   0    3.00    0.76 
   2  15   1    0.28    0.55 
  -2  15  -1    0.60    0.56 
  -2  15  -2    8.74    0.94 
   2  15   2    7.32    1.02 
  -2  15  -3    1.85    0.60 
   2  15   3    0.71    0.56 
   2  15   4    5.56    1.52 
  -2  15  -4    4.11    0.77 
  -2  15  -5    0.51    0.57 
   2  15   5    0.72    0.63 
   2 -15   5    0.74    0.72 
   2  15   6    6.84    1.00 
  -2  15  -6    5.32    0.90 
   2 -15   6    5.72    1.12 
   2  15   7    3.79    0.89 
  -2  15  -7    4.39    0.89 
   2 -15   7    2.74    1.05 
  -2  15  -8    1.69    0.74 
   2 -15   8   -0.48    1.01 
  -2  15  -9    1.02    0.75 
   2 -15   9    0.25    1.09 
  -2  15 -10    4.65    1.62 
   2 -15  10    5.27    1.57 
   2 -15  11    2.78    1.63 
   2  16 -10    0.92    0.84 
   2  16  -9   20.46    1.55 
   2  16  -8    0.96    0.70 
   2  16  -7    0.73    0.69 
  -2  16   6    3.69    0.91 
   2  16  -6    4.47    0.96 
  -2  16   5   30.47    1.80 
   2  16  -5   28.51    1.75 
   2  16  -4    1.26    0.76 
  -2  16   4    1.63    0.65 
  -2  16   3   15.89    1.31 
   2  16  -3   15.80    1.56 
   2  16  -2    0.38    0.67 
  -2  16   2    0.50    0.57 
   2  16  -1    3.06    0.86 
  -2  16   0   -0.34    0.49 
   2  16   0    0.26    0.54 
   2  16   1    0.15    0.54 
  -2  16  -1    0.38    0.59 
  -2  16  -2    4.00    0.81 
   2  16   2    3.83    0.89 
  -2  16  -3    1.00    0.62 
   2  16   3    1.79    0.73 
   2  16   4   -0.27    0.55 
  -2  16  -4    0.69    0.61 
   2  16   5    7.28    1.75 
  -2  16  -5    7.07    1.06 
  -2  16  -6    0.21    0.65 
  -2  16  -7    2.83    0.87 
  -2  16  -8    4.71    1.13 
   2  17  -3    2.95    1.24 
   2  17  -2    7.90    1.79 
  -2  17   1   16.83    1.37 
  -2  17   0    4.03    0.92 
  -2  17  -1   11.76    1.21 
  -2  17  -2    1.32    0.75 
  -2  17  -3    4.88    0.96 
  -2  17  -4    0.08    0.64 
  -2  17  -5    0.33    0.73 
  -2  17  -6   16.42    1.46 
  -2  17  -7    0.57    0.90 
  -2  17  -8   -0.17    1.28 
  -3   0  19    0.12    0.95 
  -3   0  19    0.12    0.59 
  -3   0  18    0.07    1.42 
  -3   0  18    0.59    0.50 
  -3   0  17    0.26    0.80 
  -3   0  17   -0.04    0.45 
  -3   0  16    1.57    0.82 
   3   0 -15    0.27    0.36 
  -3   0  15   -0.18    0.62 
  -3   0  14   49.19    2.82 
   3   0 -14   46.13    1.63 
   3   0 -13    0.11    0.30 
  -3   0  13    0.12    0.30 
  -3   0  13   -0.37    0.53 
  -3   0  12    1.94    0.70 
  -3   0  12    3.13    0.52 
   3   0 -12    2.99    0.56 
  -3   0  11    0.19    0.42 
   3   0 -11   -0.04    0.30 
  -3   0  10   32.06    1.54 
   3   0 -10   30.94    1.15 
  -3   0  10   29.52    1.11 
  -3   0  10   31.20    1.60 
  -3   0   9   -0.08    0.32 
   3   0  -9    0.26    0.27 
  -3   0   9   -0.16    0.20 
   3   0  -8  145.84    3.22 
  -3   0   8  140.90    3.69 
  -3   0   8  140.24    3.72 
  -3   0   8  143.66    3.20 
  -3   0   7   -0.25    0.31 
  -3   0   7   -0.13    0.32 
   3   0  -7    0.06    0.24 
  -3   0   7   -0.06    0.22 
  -3   0   6   27.56    1.19 
  -3   0   6   29.26    1.22 
  -3   0   6   26.83    0.92 
   3   0  -6   28.79    0.96 
  -3   0   5    0.09    0.15 
   3   0  -5    0.24    0.19 
  -3   0   5    0.01    0.21 
   3   0  -3    0.02    0.15 
  -3   0   3   -0.13    0.13 
  -3   0   3   -0.01    0.13 
   3   0  -3   -0.06    0.14 
   3   0  -2  775.76   14.64 
  -3   0   2  791.15   14.57 
   3   0  -2  784.64   14.57 
   3   0  -1   -0.05    0.10 
  -3   0   1   -0.05    0.12 
   3   0  -1   -0.04    0.09 
  -3   0   1   -0.01    0.10 
  -3   0   0   80.05    1.63 
   3   0   0   80.22    1.70 
   3   0   0   79.60    1.75 
  -3   0   0   81.21    1.75 
   3   0   1   -0.03    0.08 
  -3   0  -1    0.03    0.12 
  -3   0  -1    0.07    0.08 
   3   0   1    0.02    0.11 
  -3   0  -2   36.17    1.03 
   3   0   3   -0.06    0.14 
  -3   0  -3   -0.18    0.13 
  -3   0  -4  283.75    5.92 
   3   0   4  286.10    5.82 
   3   0   5   -0.08    0.21 
  -3   0  -5   -0.12    0.29 
   3   0   6    6.69    0.56 
  -3   0  -6    7.49    0.68 
  -3   0  -7   -0.09    0.23 
   3   0   7    0.11    0.25 
  -3   0  -8    3.07    0.63 
   3   0   8    2.43    0.51 
  -3   0  -9    0.06    0.42 
  -3   0 -10    7.00    1.08 
  -3   0 -11   -0.41    0.44 
  -3   0 -13   -0.32    0.55 
  -3   0 -14   19.90    1.72 
  -3   0 -15   -0.51    0.65 
  -3   0 -17    3.43    1.11 
  -3   1  19   22.23    2.05 
  -3   1  19   21.84    1.32 
  -3  -1  19   22.95    3.04 
  -3   1  18    6.73    1.56 
  -3  -1  18    5.88    1.48 
  -3  -1  18    3.85    0.76 
  -3   1  17    2.37    0.93 
  -3   1  17    1.12    0.55 
  -3  -1  17    1.12    0.84 
   3   1 -16   26.86    1.26 
  -3   1  16   27.97    1.39 
  -3   1  16   27.49    1.97 
  -3  -1  16   25.59    1.97 
   3   1 -15   13.84    0.90 
  -3   1  15   14.53    1.44 
  -3  -1  15   14.80    1.50 
   3   1 -14    5.62    0.64 
  -3   1  14    8.19    1.36 
  -3  -1  14   10.58    1.73 
   3  -1 -14    6.78    0.69 
   3   1 -13   23.01    1.08 
  -3   1  13   25.29    1.67 
   3  -1 -13   25.34    1.15 
  -3  -1  13   26.91    1.74 
  -3  -1  13   23.00    1.07 
   3   1 -12   -0.26    0.30 
  -3   1  12   -0.31    0.48 
  -3   1  12    0.56    0.34 
  -3  -1  12    0.35    0.55 
   3  -1 -12   -0.08    0.32 
  -3  -1  12    0.62    0.34 
   3   1 -11   -0.43    0.26 
  -3   1  11    0.24    0.46 
  -3   1  11   -0.06    0.28 
   3  -1 -11    0.30    0.33 
  -3  -1  11   -0.29    0.46 
  -3  -1  11    0.51    0.29 
  -3   1  10   35.36    1.69 
  -3   1  10   35.09    1.26 
   3   1 -10   36.16    1.26 
  -3   1  10   35.65    1.63 
  -3  -1  10   39.08    1.80 
  -3  -1  10   36.29    1.24 
  -3  -1  10   37.49    1.73 
  -3   1   9   20.79    1.18 
  -3   1   9   21.26    1.24 
   3   1  -9   20.15    0.87 
  -3   1   9   20.01    0.88 
  -3  -1   9   18.49    1.19 
  -3  -1   9   20.26    0.85 
   3  -1  -9   20.70    0.90 
  -3  -1   9   19.72    1.18 
  -3   1   8    6.64    0.71 
  -3   1   8    6.62    0.50 
  -3   1   8    7.91    0.73 
   3   1  -8    6.79    0.51 
  -3  -1   8    6.35    0.71 
  -3  -1   8    5.78    0.69 
   3  -1  -8    6.66    0.52 
  -3  -1   8    7.23    0.49 
   3   1  -7   62.92    1.65 
  -3   1   7   61.71    1.98 
  -3   1   7   61.30    1.97 
  -3   1   7   60.54    1.64 
  -3  -1   7   61.45    1.63 
   3  -1  -7   62.71    1.68 
  -3  -1   7   59.85    2.03 
  -3  -1   7   64.24    2.07 
  -3   1   6  105.27    2.69 
  -3   1   6  104.65    2.72 
   3   1  -6  104.62    2.39 
  -3   1   6  102.79    2.39 
   3  -1  -6  100.63    2.39 
  -3  -1   6  106.05    2.39 
  -3  -1   6  105.52    2.78 
  -3  -1   6  104.07    2.78 
   3   1  -5  124.63    2.72 
  -3   1   5  123.50    2.93 
  -3   1   5  124.35    2.73 
  -3  -1   5  127.55    2.72 
  -3  -1   5  128.12    3.04 
  -3  -1   5  125.35    3.05 
   3  -1  -5  122.97    2.73 
   3   1  -4  463.48    9.27 
  -3   1   4  447.89    8.81 
   3   1  -4  462.09    8.68 
  -3  -1   4  440.18    8.89 
   3  -1  -4  451.30    8.68 
   3  -1  -4  454.61    8.87 
   3   1  -3    2.33    0.26 
  -3   1   3    1.97    0.25 
   3   1  -3    2.98    0.39 
  -3   1   3    2.38    0.26 
   3  -1  -3    2.36    0.30 
  -3  -1   3    2.43    0.33 
  -3  -1   3    2.44    0.29 
   3  -1  -3    2.41    0.29 
   3   1  -2   66.24    1.57 
  -3   1   2   67.06    1.49 
  -3   1   2   65.80    1.49 
   3   1  -2   66.55    1.50 
   3  -1  -2   65.87    1.50 
  -3  -1   2   66.95    1.50 
  -3  -1   2   67.21    1.54 
   3  -1  -2   65.40    1.49 
  -3   1   1  274.86    5.21 
   3   1  -1  266.07    5.20 
   3   1  -1  269.02    5.18 
   3  -1  -1  264.28    5.15 
  -3  -1   1  264.76    5.17 
  -3  -1   1  277.85    5.21 
   3  -1  -1  272.42    5.19 
   3   1   0  510.98    9.67 
   3   1   0  511.03    9.73 
  -3   1   0  531.27    9.62 
   3  -1   0  532.32    9.69 
   3  -1   0  504.87    9.75 
   3   1   1   16.55    0.48 
   3   1   1   16.99    0.56 
  -3   1  -1   15.96    0.58 
   3  -1   1   16.33    0.57 
  -3  -1  -1   16.21    0.47 
  -3  -1  -1   16.50    0.56 
   3  -1   1   16.49    0.41 
   3   1   2   36.70    1.01 
  -3   1  -2   36.53    1.06 
   3   1   2   36.84    0.85 
  -3  -1  -2   37.08    1.02 
   3  -1   2   35.46    1.04 
  -3  -1  -2   35.79    0.85 
   3   1   3    2.50    0.28 
  -3   1  -3    2.51    0.36 
   3   1   3    1.82    0.18 
  -3  -1  -3    2.15    0.20 
  -3  -1  -3    3.31    0.40 
   3  -1   3    2.42    0.37 
  -3   1  -4   17.72    0.87 
   3   1   4   19.12    0.79 
   3   1   4   18.66    0.56 
   3  -1   4   18.40    0.81 
  -3  -1  -4   18.59    0.84 
   3   1   5    7.65    0.55 
   3   1   5    8.05    0.38 
  -3   1  -5    7.45    0.65 
   3   1   5    7.89    0.37 
   3  -1   5    7.81    0.59 
  -3  -1  -5    7.55    0.63 
   3   1   6   24.75    0.72 
   3   1   6   24.29    1.02 
  -3   1  -6   23.98    1.33 
   3   1   6   24.26    0.72 
  -3  -1  -6   24.26    1.14 
   3  -1   6   25.08    1.07 
   3   1   7   35.92    0.99 
   3   1   7   37.80    1.00 
  -3   1  -7   37.85    1.62 
   3   1   7   37.99    1.42 
   3  -1   7   38.48    1.45 
  -3  -1  -7   36.95    1.56 
   3   1   8    0.67    0.29 
   3   1   8    0.88    0.24 
  -3   1  -8    1.53    0.53 
  -3  -1  -8    1.44    0.54 
   3  -1   8    0.63    0.28 
  -3   1  -9   43.25    1.95 
   3   1   9   40.36    1.13 
   3   1   9   44.03    1.16 
  -3  -1  -9   37.79    1.82 
   3   1  10   17.47    0.69 
  -3   1 -10   16.66    1.31 
   3   1  10   17.13    0.68 
  -3  -1 -10   15.36    1.25 
   3   1  11   74.39    1.84 
  -3   1 -11   78.67    3.03 
   3   1  11   77.78    1.88 
  -3  -1 -11   78.60    2.97 
  -3   1 -12   12.18    1.31 
  -3  -1 -12   11.88    1.25 
  -3   1 -13    6.20    1.30 
  -3  -1 -13    6.87    1.24 
  -3   1 -14   16.89    1.64 
  -3  -1 -14   15.90    1.57 
  -3   1 -15    0.00    0.72 
  -3  -1 -15    0.25    0.61 
  -3   1 -16    0.46    0.74 
  -3  -1 -16    0.43    0.96 
  -3   1 -17    2.77    1.46 
  -3  -1 -17    4.57    1.33 
  -3   2  19   -0.07    0.80 
  -3   2  19    0.27    0.63 
  -3  -2  19   -0.50    0.64 
  -3   2  18    4.46    1.14 
  -3   2  18    4.27    0.83 
  -3  -2  18    5.53    1.30 
   3   2 -17   12.96    0.96 
  -3   2  17   14.51    1.55 
  -3   2  17   13.02    1.03 
  -3  -2  17   13.03    1.72 
  -3   2  16    9.64    1.38 
  -3   2  16    9.59    0.92 
   3   2 -16    9.83    0.81 
  -3  -2  16    8.65    1.43 
  -3   2  15    3.36    0.92 
  -3   2  15    3.55    0.66 
   3   2 -15    4.68    0.68 
  -3  -2  15    4.08    1.15 
  -3   2  14    5.49    0.75 
  -3   2  14    4.81    1.01 
   3   2 -14    4.78    0.67 
  -3  -2  14    5.30    1.17 
   3   2 -13    7.59    0.69 
  -3   2  13    9.65    1.21 
  -3  -2  13    8.37    1.15 
  -3  -2  13    7.93    0.66 
   3   2 -12    5.10    0.60 
  -3   2  12    6.01    0.92 
  -3   2  12    6.06    0.81 
   3  -2 -12    7.65    0.84 
  -3  -2  12    5.82    1.04 
  -3  -2  12    5.75    0.57 
  -3   2  11    6.24    0.61 
  -3   2  11    7.04    0.98 
   3   2 -11    5.10    0.56 
   3  -2 -11    6.34    0.61 
  -3  -2  11    5.72    0.54 
  -3  -2  11    6.30    1.00 
  -3   2  10   28.97    1.49 
   3   2 -10   30.29    1.12 
  -3   2  10   29.24    1.43 
  -3  -2  10   27.32    1.06 
  -3  -2  10   28.05    1.56 
   3  -2 -10   29.70    1.16 
  -3   2   9   45.61    1.46 
  -3   2   9   46.66    1.77 
   3   2  -9   46.10    1.41 
  -3  -2   9   43.98    1.37 
  -3  -2   9   46.77    1.87 
   3  -2  -9   44.40    1.46 
  -3  -2   9   44.78    1.90 
  -3   2   8   20.33    1.09 
  -3   2   8   18.91    0.86 
  -3   2   8   19.17    1.06 
   3   2  -8   20.54    0.84 
  -3  -2   8   19.66    0.81 
  -3  -2   8   19.27    1.12 
   3  -2  -8   20.64    0.88 
  -3  -2   8   20.89    1.82 
  -3   2   7   60.42    1.65 
  -3   2   7   62.38    1.92 
  -3   2   7   58.13    1.89 
   3   2  -7   59.01    1.60 
  -3  -2   7   59.59    1.59 
  -3  -2   7   58.97    2.02 
   3  -2  -7   58.10    1.64 
  -3  -2   7   61.22    2.04 
   3   2  -6    0.79    0.28 
  -3   2   6    0.53    0.32 
  -3   2   6    0.80    0.34 
  -3   2   6    0.84    0.33 
  -3  -2   6    0.47    0.26 
  -3  -2   6    0.64    0.37 
   3  -2  -6    0.98    0.32 
  -3  -2   6    1.25    0.44 
   3   2  -5  113.84    2.53 
  -3   2   5  113.72    2.67 
  -3   2   5  115.29    2.56 
  -3  -2   5  110.35    2.82 
  -3  -2   5  113.31    2.51 
   3  -2  -5  114.46    2.56 
  -3  -2   5  109.29    2.84 
  -3   2   4   73.28    1.79 
  -3   2   4   73.61    1.76 
   3   2  -4   76.06    1.76 
   3   2  -4   74.31    2.01 
  -3  -2   4   72.70    1.73 
  -3  -2   4   73.21    1.94 
   3  -2  -4   73.87    1.77 
   3   2  -3  261.35    5.40 
  -3   2   3  290.25    5.53 
  -3   2   3  259.39    5.16 
   3   2  -3  260.96    5.21 
  -3  -2   3  260.24    5.34 
   3  -2  -3  261.61    5.22 
  -3  -2   3  260.25    5.35 
   3   2  -2  363.18    6.87 
  -3   2   2  367.55    6.80 
   3   2  -2  348.63    6.93 
  -3   2   2  352.73    6.84 
   3  -2  -2  359.66    6.86 
  -3  -2   2  348.13    6.84 
  -3  -2   2  359.35    6.89 
   3   2  -1    1.84    0.21 
  -3   2   1    1.79    0.19 
   3   2  -1    1.47    0.21 
  -3   2   1    1.28    0.20 
   3  -2  -1    1.91    0.22 
  -3  -2   1    1.85    0.23 
  -3  -2   1    1.99    0.20 
  -3   2   0   54.23    1.30 
  -3   2   0   54.65    1.21 
   3   2   0   53.05    1.27 
   3   2   0   54.06    1.25 
   3  -2   0   53.94    1.29 
  -3  -2   0   59.09    1.28 
  -3  -2   0   54.70    1.27 
  -3   2  -1   49.03    1.26 
   3   2   1   50.47    1.18 
   3   2   1   50.79    1.20 
  -3   2  -1   47.51    1.07 
  -3   2  -1   50.00    1.08 
  -3  -2  -1   49.90    1.19 
   3  -2   1   50.23    1.26 
  -3   2  -2   22.96    0.82 
   3   2   2   23.68    0.73 
   3   2   2   24.19    0.69 
  -3  -2  -2   24.18    0.75 
   3  -2   2   23.30    0.80 
  -3  -2  -2   23.70    0.69 
   3   2   3    1.07    0.21 
  -3   2  -3    1.34    0.36 
   3   2   3    1.06    0.24 
   3  -2   3    1.04    0.30 
  -3  -2  -3    1.37    0.24 
  -3  -2  -3    0.75    0.23 
   3   2   4  119.17    2.54 
   3   2   4  123.92    2.74 
  -3   2  -4  121.99    2.99 
  -3  -2  -4  120.86    2.83 
   3  -2   4  121.23    2.86 
  -3  -2  -4  118.32    2.53 
   3   2   5   17.80    0.79 
   3   2   5   17.73    0.64 
  -3   2  -5   17.81    0.97 
  -3  -2  -5   17.10    0.88 
   3  -2   5   18.44    0.88 
   3   2   6    0.21    0.20 
  -3   2  -6    0.43    0.31 
   3   2   6    0.03    0.22 
   3   2   6    0.70    0.26 
  -3  -2  -6    0.44    0.32 
   3  -2   6   -0.18    0.17 
   3   2   7   26.65    0.87 
  -3   2  -7   23.89    1.30 
   3   2   7   26.74    0.86 
   3   2   7   26.66    1.10 
   3  -2   7   26.62    1.19 
   3   2   8   67.14    1.68 
  -3   2  -8   67.25    2.44 
   3   2   8   68.75    1.69 
   3   2   8   66.83    2.06 
  -3  -2  -8   66.32    2.31 
  -3   2  -9    1.43    0.56 
   3   2   9    1.38    0.32 
   3   2   9    2.50    0.38 
  -3  -2  -9    1.24    0.58 
   3   2  10    0.50    0.29 
   3   2  10    0.38    0.29 
  -3   2 -10   -0.42    0.40 
  -3  -2 -10    0.54    0.49 
   3   2  11    1.78    0.38 
   3   2  11    1.88    0.37 
  -3   2 -11    1.82    0.73 
  -3  -2 -11    0.90    0.64 
   3   2  12    4.22    0.50 
   3   2  12    3.40    0.45 
  -3   2 -12    4.29    1.04 
  -3  -2 -12    4.15    0.91 
   3   2  13   26.41    0.99 
   3   2  13   26.60    1.01 
  -3   2 -13   24.96    1.89 
  -3  -2 -13   25.75    1.83 
  -3   2 -14    7.91    1.48 
  -3  -2 -14    5.16    1.25 
  -3   2 -15   11.67    1.72 
  -3  -2 -15   11.71    1.73 
  -3   2 -16    2.23    0.87 
  -3  -2 -16    0.63    0.83 
  -3  -2 -17    0.02    0.79 
  -3   3  19    4.52    1.23 
  -3   3  19    3.99    0.86 
   3   3 -18    7.46    0.92 
  -3   3  18    6.50    1.27 
  -3   3  18    7.36    0.95 
  -3  -3  18    6.81    1.47 
  -3   3  17   23.37    1.86 
   3   3 -17   26.63    1.26 
  -3   3  17   20.97    1.30 
  -3  -3  17   22.62    2.01 
  -3   3  16    7.77    1.29 
   3   3 -16    6.43    0.79 
  -3   3  16    6.25    0.91 
  -3  -3  16    5.33    1.27 
  -3   3  15    0.58    0.58 
   3   3 -15    0.63    0.41 
  -3   3  15    0.17    0.45 
  -3  -3  15   -0.50    0.67 
  -3   3  14   40.56    2.11 
   3   3 -14   40.02    1.48 
  -3   3  14   40.99    1.65 
  -3  -3  14   42.35    2.35 
  -3   3  13    0.07    0.50 
   3   3 -13    0.18    0.35 
  -3   3  13   -0.10    0.35 
  -3  -3  13    0.64    0.56 
  -3  -3  13    1.11    0.38 
  -3   3  12    0.25    0.43 
  -3   3  12    0.24    0.36 
   3   3 -12    0.56    0.39 
  -3  -3  12    1.53    0.43 
  -3  -3  12    1.43    0.64 
  -3   3  11   11.64    0.97 
  -3   3  11    9.66    0.77 
  -3   3  11   10.06    0.99 
   3   3 -11   10.31    0.72 
  -3  -3  11   11.54    1.12 
  -3   3  10    7.11    0.81 
  -3   3  10    7.32    0.64 
  -3   3  10    7.31    0.77 
   3   3 -10    6.91    0.60 
  -3  -3  10    7.43    0.90 
  -3  -3  10    6.90    0.56 
  -3   3   9   37.78    1.50 
  -3   3   9   36.69    1.51 
  -3   3   9   34.78    1.52 
   3   3  -9   37.06    1.25 
  -3  -3   9   36.36    1.66 
  -3  -3   9   34.50    1.18 
  -3  -3   9   34.98    1.69 
  -3   3   8    1.87    0.46 
  -3   3   8    1.57    0.44 
   3   3  -8    1.76    0.36 
  -3   3   8    2.08    0.45 
  -3  -3   8    2.22    0.39 
  -3  -3   8    1.95    0.50 
  -3  -3   8    2.40    0.61 
   3  -3  -8    1.82    0.43 
  -3   3   7   40.88    1.34 
  -3   3   7   42.63    1.48 
   3   3  -7   42.34    1.29 
  -3   3   7   41.35    1.49 
  -3  -3   7   42.33    1.65 
   3  -3  -7   41.93    1.35 
  -3  -3   7   44.05    1.70 
  -3  -3   7   41.99    1.26 
   3   3  -6  178.05    3.70 
  -3   3   6  171.23    3.88 
  -3   3   6  170.97    3.72 
  -3   3   6  166.87    3.80 
  -3  -3   6  168.51    4.08 
   3  -3  -6  169.03    3.72 
  -3  -3   6  168.64    4.09 
  -3  -3   6  168.10    3.62 
  -3   3   5    2.28    0.40 
  -3   3   5    2.47    0.37 
   3   3  -5    2.59    0.41 
  -3  -3   5    2.72    0.36 
  -3  -3   5    1.65    0.43 
  -3  -3   5    1.44    0.41 
   3  -3  -5    2.13    0.40 
  -3   3   4   78.74    1.82 
   3   3  -4   77.21    1.88 
  -3   3   4   81.24    1.92 
   3  -3  -4   77.12    1.91 
   3  -3  -4   78.50    1.92 
  -3  -3   4   76.89    1.85 
  -3  -3   4   78.88    2.11 
  -3  -3   4   76.11    2.06 
  -3   3   3   22.65    0.78 
   3   3  -3   22.75    0.77 
  -3   3   3   21.98    0.66 
   3   3  -3   22.88    1.03 
  -3  -3   3   21.71    0.74 
   3  -3  -3   22.90    0.73 
  -3  -3   3   21.02    0.81 
   3   3  -2  107.93    2.46 
  -3   3   2  114.22    2.29 
  -3   3   2  108.25    2.41 
   3   3  -2  113.19    2.42 
   3  -3  -2  109.42    2.28 
  -3  -3   2  107.44    2.38 
  -3  -3   2  110.87    2.40 
   3   3  -1    0.06    0.12 
  -3   3   1    0.17    0.11 
  -3   3   1    0.34    0.15 
   3   3  -1    0.54    0.18 
  -3   3   1    0.10    0.14 
   3  -3  -1    0.19    0.11 
  -3  -3   1    0.24    0.12 
  -3  -3   1    0.32    0.19 
   3   3   0   65.72    1.48 
  -3   3   0   66.72    1.51 
  -3   3   0   65.37    1.54 
   3   3   0   67.17    1.59 
  -3  -3   0   70.30    1.50 
   3   3   1    3.56    0.29 
  -3   3  -1    3.47    0.30 
  -3   3  -1    3.59    0.25 
   3   3   1    3.50    0.24 
   3  -3   1    3.20    0.31 
  -3  -3  -1    3.37    0.24 
  -3   3  -2    4.74    0.26 
   3   3   2    4.62    0.30 
  -3   3  -2    4.28    0.39 
   3   3   2    4.69    0.34 
   3  -3   2    3.82    0.35 
   3  -3   2    4.06    0.26 
  -3  -3  -2    4.21    0.30 
  -3  -3  -2    4.26    0.38 
   3   3   3   29.44    0.92 
  -3   3  -3   31.78    0.74 
  -3   3  -3   29.92    1.12 
  -3  -3  -3   30.53    0.97 
   3  -3   3   30.22    1.05 
   3   3   4   70.25    1.71 
   3   3   4   70.77    1.75 
  -3   3  -4   70.32    2.06 
  -3  -3  -4   70.83    1.71 
  -3  -3  -4   70.05    1.85 
   3  -3   4   70.79    1.93 
   3   3   5    1.31    0.30 
   3   3   5    1.83    0.32 
  -3   3  -5    1.52    0.43 
  -3  -3  -5    2.12    0.34 
   3  -3   5    1.58    0.40 
  -3  -3  -5    1.59    0.41 
   3   3   6  198.14    4.14 
   3   3   6  198.24    4.33 
  -3   3  -6  197.76    4.81 
  -3  -3  -6  199.66    4.57 
   3   3   7    0.41    0.26 
  -3   3  -7    0.30    0.39 
   3   3   7   -0.13    0.21 
   3   3   7    0.38    0.25 
   3  -3   7    0.19    0.25 
  -3  -3  -7    0.61    0.38 
  -3   3  -8    2.70    0.67 
   3   3   8    1.67    0.35 
   3   3   8    2.08    0.48 
   3   3   8    2.21    0.40 
  -3  -3  -8    1.74    0.50 
   3   3   9    0.12    0.28 
  -3   3  -9    0.07    0.42 
   3   3   9   -0.18    0.26 
   3   3   9    0.06    0.30 
  -3  -3  -9    0.16    0.39 
  -3   3 -10   -0.10    0.47 
   3   3  10    0.06    0.31 
   3   3  10   -0.08    0.27 
  -3  -3 -10    0.63    0.48 
  -3   3 -11   11.03    1.21 
   3   3  11   12.88    0.74 
   3   3  11   13.68    0.75 
  -3  -3 -11   14.87    1.29 
  -3   3 -12   11.04    1.26 
   3   3  12    9.47    0.65 
   3   3  12   10.51    1.03 
  -3  -3 -12   10.37    1.17 
   3   3  13   30.54    1.19 
  -3   3 -13   26.65    1.93 
  -3  -3 -13   30.02    1.91 
   3   3  14   17.19    0.87 
  -3   3 -14   17.03    1.67 
  -3  -3 -14   15.12    1.53 
  -3   3 -15   16.57    1.76 
   3   3  15   19.88    0.94 
  -3  -3 -15   19.51    1.75 
  -3   3 -16    7.34    1.53 
  -3  -3 -16    4.97    1.27 
  -3   4  19    2.99    0.81 
  -3   4  19    2.68    1.03 
   3   4 -18    1.43    0.68 
  -3   4  18    0.82    0.77 
  -3   4  18   -0.17    0.57 
  -3  -4  18    1.22    0.89 
   3   4 -17    8.22    0.86 
  -3   4  17    7.74    1.03 
  -3   4  17    7.41    1.29 
  -3  -4  17    8.47    2.05 
  -3   4  16   -0.29    0.57 
   3   4 -16    0.30    0.41 
  -3   4  16   -0.36    0.51 
  -3  -4  16    0.21    0.70 
  -3   4  15    1.10    0.91 
   3   4 -15    0.07    0.38 
  -3   4  15    0.47    0.51 
  -3  -4  15    0.27    0.67 
   3   4 -14   19.79    1.04 
  -3   4  14   21.73    1.52 
  -3   4  14   19.95    1.19 
  -3  -4  14   20.31    1.73 
  -3   4  13    1.33    0.59 
   3   4 -13    1.02    0.42 
  -3   4  13    0.34    0.42 
  -3  -4  13    1.79    0.49 
  -3   4  12   17.12    1.06 
   3   4 -12   20.00    0.99 
  -3   4  12   18.26    1.29 
  -3  -4  12   19.08    1.50 
  -3  -4  12   17.46    0.92 
  -3   4  11    2.26    0.54 
   3   4 -11    3.29    0.54 
  -3   4  11    3.44    0.61 
  -3   4  11    2.67    0.64 
  -3  -4  11    4.20    0.57 
  -3  -4  11    6.10    1.10 
  -3   4  10    4.40    0.64 
   3   4 -10    4.41    0.67 
  -3   4  10    4.36    0.71 
  -3   4  10    5.31    0.75 
  -3  -4  10    4.57    0.56 
  -3  -4  10    3.37    0.76 
  -3   4   9   65.50    1.99 
  -3   4   9   64.88    2.12 
  -3   4   9   68.96    1.98 
  -3   4   9   64.22    2.09 
   3   4  -9   65.59    1.85 
  -3  -4   9   64.58    2.41 
  -3  -4   9   62.50    1.79 
  -3  -4   9   63.51    2.32 
  -3   4   8  101.46    2.60 
   3   4  -8   97.26    2.43 
  -3   4   8   97.17    2.64 
  -3   4   8  100.71    2.81 
  -3   4   8   96.49    2.65 
  -3  -4   8   97.17    2.99 
  -3  -4   8   98.79    2.99 
  -3  -4   8   93.65    2.37 
  -3   4   7    1.22    0.37 
  -3   4   7    0.71    0.31 
   3   4  -7    0.92    0.28 
  -3   4   7    0.35    0.31 
  -3   4   7    0.58    0.32 
  -3  -4   7    0.73    0.26 
  -3  -4   7    0.56    0.38 
  -3  -4   7    0.62    0.40 
   3   4  -6   53.78    1.51 
  -3   4   6   52.05    1.58 
  -3   4   6   52.70    1.52 
  -3   4   6   51.45    1.59 
  -3   4   6   52.88    1.57 
  -3  -4   6   50.93    1.45 
  -3  -4   6   54.43    1.85 
  -3  -4   6   50.67    1.80 
  -3   4   5   13.09    0.61 
   3   4  -5   13.86    0.69 
  -3   4   5   13.58    0.72 
  -3   4   5   13.71    0.74 
  -3  -4   5   13.95    0.86 
  -3  -4   5   13.68    0.65 
  -3  -4   5   13.93    0.88 
  -3   4   4   20.46    0.84 
   3   4  -4   21.25    0.83 
  -3   4   4   20.91    0.86 
  -3   4   4   21.30    0.68 
   3  -4  -4   19.82    0.78 
  -3  -4   4   21.14    0.80 
  -3  -4   4   21.47    0.96 
  -3  -4   4   20.93    0.98 
  -3   4   3    1.14    0.28 
  -3   4   3    1.17    0.20 
   3   4  -3    1.24    0.29 
  -3   4   3    0.78    0.27 
  -3  -4   3    1.10    0.26 
   3  -4  -3    0.69    0.21 
  -3  -4   3    0.52    0.25 
  -3   4   2    2.95    0.34 
  -3   4   2    2.71    0.23 
   3   4  -2    2.91    0.37 
   3   4  -2    3.14    0.38 
  -3   4   2    2.60    0.36 
   3  -4  -2    2.62    0.23 
  -3  -4   2    2.93    0.31 
  -3  -4   2    2.68    0.29 
  -3   4   1   12.00    0.55 
   3   4  -1   11.72    0.53 
   3   4  -1   12.19    0.57 
  -3   4   1   12.29    0.46 
  -3  -4   1   11.65    0.45 
  -3  -4   1   11.76    0.55 
   3  -4  -1   12.27    0.46 
   3   4   0  118.69    2.52 
  -3   4   0  122.74    2.63 
   3   4   0  124.66    2.72 
  -3   4   0  119.62    2.60 
   3  -4   0  124.58    2.60 
  -3  -4   0  127.06    2.52 
  -3  -4   0  121.78    2.68 
   3   4   1   35.24    1.07 
   3   4   1   35.57    0.90 
  -3   4  -1   36.82    1.08 
  -3   4  -1   33.95    0.96 
   3  -4   1   34.66    0.97 
  -3  -4  -1   35.71    1.06 
  -3  -4  -1   35.63    0.90 
  -3   4  -2    7.62    0.40 
   3   4   2    8.66    0.51 
   3   4   2    8.54    0.40 
  -3   4  -2    6.99    0.53 
   3  -4   2    8.59    0.43 
  -3  -4  -2    7.83    0.50 
   3  -4   2    7.07    0.48 
  -3  -4  -2    7.80    0.40 
  -3   4  -3   90.28    2.40 
   3   4   3   90.99    2.08 
  -3   4  -3   97.01    1.98 
   3   4   3   94.51    2.21 
   3  -4   3   92.37    1.99 
  -3  -4  -3   93.46    2.13 
   3  -4   3   94.45    2.30 
  -3  -4  -3   90.39    2.18 
   3   4   4   -0.06    0.16 
  -3   4  -4    0.00    0.15 
  -3   4  -4    0.20    0.29 
   3   4   4    0.19    0.23 
  -3  -4  -4    0.04    0.21 
  -3  -4  -4    0.04    0.13 
   3  -4   4    0.13    0.17 
   3  -4   4   -0.11    0.22 
  -3   4  -5    0.50    0.36 
   3   4   5    0.16    0.17 
   3   4   5    0.59    0.26 
   3  -4   5    0.50    0.29 
   3  -4   5    0.39    0.17 
  -3  -4  -5    0.40    0.25 
  -3  -4  -5    0.30    0.21 
   3   4   6    8.23    0.55 
   3   4   6    7.98    0.53 
  -3   4  -6    7.34    0.74 
   3  -4   6    8.56    0.68 
  -3  -4  -6    8.18    0.53 
  -3  -4  -6    7.19    0.64 
  -3   4  -7    9.53    0.89 
   3   4   7   10.83    0.63 
   3   4   7    9.98    0.62 
   3   4   7   10.37    0.65 
  -3  -4  -7    9.98    0.79 
   3  -4   7    9.71    0.76 
   3   4   8   28.37    1.08 
   3   4   8   27.76    1.06 
  -3   4  -8   27.51    1.55 
  -3  -4  -8   28.28    1.39 
  -3   4  -9    0.56    0.51 
   3   4   9    0.62    0.33 
   3   4   9    0.81    0.36 
   3   4   9    1.32    0.37 
  -3  -4  -9    0.35    0.45 
   3   4  10    0.08    0.37 
  -3   4 -10   -0.57    0.43 
   3   4  10    0.58    0.34 
  -3  -4 -10   -0.51    0.42 
   3   4  11    2.76    0.50 
   3   4  11    2.56    0.49 
  -3  -4 -11    3.08    0.77 
  -3   4 -12   58.78    2.79 
   3   4  12   57.98    1.79 
   3   4  12   57.38    1.78 
  -3  -4 -12   56.61    2.51 
   3   4  13    9.56    0.73 
  -3   4 -13   11.68    1.41 
   3   4  13    8.87    0.77 
  -3  -4 -13   11.50    1.47 
  -3   4 -14    0.40    0.71 
   3   4  14    0.53    0.41 
  -3  -4 -14    0.75    0.61 
   3   4  15   22.51    1.07 
  -3  -4 -15   20.83    1.78 
  -3   4 -16   10.35    1.66 
  -3  -4 -16    9.14    1.56 
  -3   5  19    0.71    0.88 
  -3   5  19    2.82    0.74 
  -3   5  18    6.05    0.93 
   3   5 -18    6.74    0.96 
  -3   5  18    6.80    1.32 
  -3  -5  18    6.36    1.46 
  -3   5  17   18.06    1.59 
   3   5 -17   16.40    1.09 
  -3   5  17   17.01    1.23 
  -3  -5  17   13.74    1.71 
  -3   5  16    2.79    0.89 
   3   5 -16    3.15    0.62 
  -3   5  16    1.80    0.64 
  -3  -5  16    1.39    0.84 
  -3   5  15    7.26    1.34 
   3   5 -15    5.98    0.76 
  -3  -5  15    3.40    0.99 
  -3   5  14   16.99    1.38 
   3   5 -14   15.30    0.95 
  -3   5  14   15.65    1.11 
  -3  -5  14   19.54    1.68 
  -3   5  13    7.43    1.09 
  -3   5  13    5.44    0.76 
   3   5 -13    6.99    0.80 
  -3  -5  13    6.66    1.21 
   3   5 -12    8.32    0.72 
  -3   5  12    9.03    0.83 
  -3   5  12    8.85    0.94 
  -3  -5  12   10.59    1.44 
  -3  -5  12    8.92    0.69 
  -3   5  11    0.72    0.48 
  -3   5  11    0.79    0.46 
  -3   5  11    0.44    0.44 
   3   5 -11    1.04    0.39 
  -3  -5  11    0.05    0.49 
  -3  -5  11    1.04    0.38 
  -3   5  10   27.91    1.26 
   3   5 -10   25.77    1.11 
  -3   5  10   26.50    1.54 
  -3   5  10   26.61    1.27 
  -3  -5  10   26.50    1.59 
  -3  -5  10   26.38    1.08 
  -3   5   9   -0.13    0.32 
  -3   5   9   -0.20    0.30 
  -3   5   9    0.05    0.34 
   3   5  -9    0.01    0.29 
  -3   5   9    0.00    0.32 
  -3  -5   9    0.38    0.29 
  -3  -5   9   -0.25    0.37 
  -3   5   8    5.06    0.58 
  -3   5   8    5.96    0.60 
  -3   5   8    4.84    0.55 
  -3   5   8    5.64    0.58 
   3   5  -8    5.44    0.54 
  -3  -5   8    5.63    0.85 
  -3  -5   8    6.97    0.92 
  -3  -5   8    5.29    0.49 
  -3   5   7   53.67    1.59 
  -3   5   7   54.40    1.71 
   3   5  -7   56.40    1.62 
  -3   5   7   55.40    1.68 
  -3  -5   7   54.19    1.56 
  -3  -5   7   52.02    1.92 
  -3  -5   7   51.94    2.42 
   3   5  -6   75.88    1.97 
  -3   5   6   72.76    1.82 
  -3   5   6   71.51    1.94 
  -3   5   6   74.09    2.03 
  -3  -5   6   71.51    1.89 
  -3  -5   6   72.43    2.25 
  -3  -5   6   70.16    2.23 
  -3   5   5    1.82    0.27 
  -3   5   5    1.42    0.31 
  -3   5   5    1.60    0.38 
   3   5  -5    2.68    0.46 
  -3   5   5    1.83    0.37 
  -3  -5   5    2.17    0.46 
  -3  -5   5    1.31    0.41 
  -3  -5   5    1.29    0.33 
  -3   5   4   16.94    0.81 
  -3   5   4   16.44    0.79 
   3   5  -4   16.25    0.76 
  -3   5   4   16.16    0.54 
  -3  -5   4   15.82    0.72 
   3  -5  -4   16.50    0.67 
  -3  -5   4   15.48    0.83 
  -3   5   3   22.95    0.92 
  -3   5   3   23.55    0.67 
   3   5  -3   23.48    0.91 
  -3   5   3   22.98    0.91 
  -3  -5   3   24.67    0.99 
   3  -5  -3   22.72    0.73 
  -3  -5   3   22.89    0.90 
  -3  -5   3   22.10    0.86 
   3   5  -2   43.29    1.34 
  -3   5   2   45.45    1.08 
   3   5  -2   47.05    1.35 
  -3   5   2   44.89    1.34 
  -3  -5   2   46.01    1.32 
  -3  -5   2   46.79    1.24 
   3  -5  -2   44.10    1.08 
   3   5  -1   13.66    0.63 
  -3   5   1   13.95    0.68 
   3   5  -1   14.52    0.70 
  -3   5   1   14.69    0.53 
   3  -5  -1   14.85    0.53 
  -3  -5   1   14.90    0.53 
   3  -5  -1   13.78    0.67 
  -3  -5   1   13.66    0.66 
  -3   5   0   -0.17    0.20 
  -3   5   0    0.02    0.17 
   3   5   0    0.11    0.24 
   3   5   0    0.42    0.20 
   3  -5   0   -0.01    0.24 
  -3  -5   0   -0.10    0.21 
   3  -5   0   -0.01    0.15 
  -3  -5   0    0.07    0.13 
   3   5   1    1.81    0.23 
  -3   5  -1    2.67    0.36 
   3   5   1    1.40    0.34 
  -3   5  -1    1.31    0.29 
  -3  -5  -1    2.20    0.24 
  -3  -5  -1    1.93    0.36 
   3  -5   1    1.80    0.29 
   3  -5   1    1.80    0.32 
   3   5   2    2.32    0.24 
  -3   5  -2    2.63    0.44 
   3   5   2    2.56    0.42 
  -3   5  -2    3.36    0.36 
   3  -5   2    2.47    0.34 
  -3  -5  -2    2.75    0.40 
  -3  -5  -2    2.24    0.26 
  -3   5  -3   18.46    0.92 
   3   5   3   20.02    0.84 
   3   5   3   20.40    0.66 
  -3   5  -3   18.69    0.66 
   3  -5   3   19.70    0.83 
  -3  -5  -3   18.98    0.81 
   3  -5   3   17.76    0.77 
  -3  -5  -3   19.14    0.69 
   3   5   4    4.52    0.45 
  -3   5  -4    4.63    0.56 
  -3   5  -4    4.33    0.32 
   3   5   4    4.66    0.35 
  -3  -5  -4    4.57    0.44 
   3  -5   4    4.35    0.45 
  -3  -5  -4    4.19    0.40 
   3   5   5    2.12    0.31 
  -3   5  -5    2.13    0.64 
   3   5   5    1.28    0.34 
  -3   5  -5    2.57    0.29 
   3  -5   5    1.47    0.38 
   3  -5   5    2.06    0.29 
  -3  -5  -5    1.83    0.38 
  -3  -5  -5    2.43    0.44 
   3   5   6   19.76    0.82 
  -3   5  -6   20.76    1.21 
   3   5   6   19.54    0.89 
  -3   5  -6   19.54    0.65 
   3  -5   6   19.35    0.66 
   3  -5   6   21.51    1.05 
  -3  -5  -6   18.99    0.96 
   3   5   7   10.47    0.82 
  -3   5  -7   13.21    1.05 
   3   5   7   10.92    0.65 
  -3  -5  -7   11.87    0.84 
   3   5   8   17.26    0.88 
  -3   5  -8   17.45    1.28 
   3   5   8   16.63    0.87 
   3   5   8   18.88    1.33 
  -3  -5  -8   17.15    1.08 
  -3   5  -9   60.00    2.53 
   3   5   9   62.50    1.93 
   3   5   9   62.32    1.86 
   3   5   9   61.16    1.86 
  -3  -5  -9   57.74    2.19 
   3   5  10    7.80    0.67 
   3   5  10    7.42    0.70 
  -3   5 -10    9.99    1.29 
  -3  -5 -10    7.86    0.93 
   3   5  11    1.89    0.46 
   3   5  11    2.44    0.57 
  -3   5 -11    1.30    0.78 
  -3  -5 -11    1.74    0.71 
  -3   5 -12   79.22    3.35 
   3   5  12   83.15    2.34 
  -3  -5 -12   77.60    2.99 
  -3   5 -13   17.96    1.66 
   3   5  13   15.99    0.96 
   3   5  14   55.78    1.86 
  -3   5 -14   49.85    2.83 
  -3  -5 -14   53.79    2.63 
  -3   5 -15   29.54    2.23 
   3   5  15   29.30    1.32 
  -3  -5 -15   27.47    2.01 
  -3   5 -16   22.26    3.35 
  -3   6  19    0.00    0.83 
  -3   6  18    0.17    0.74 
  -3   6  18    2.16    0.68 
   3   6 -18   -0.05    0.77 
  -3   6  17    1.18    0.63 
  -3   6  17    3.22    0.89 
   3   6 -17    0.88    0.62 
  -3  -6  17    0.40    0.78 
   3   6 -16    3.02    0.64 
  -3   6  16    1.84    0.63 
  -3   6  16    1.80    0.84 
  -3  -6  16    1.92    0.91 
   3   6 -15    4.92    0.74 
  -3   6  15    5.47    0.96 
  -3   6  15    3.30    0.74 
  -3  -6  15    2.15    0.94 
  -3   6  14    3.69    0.80 
   3   6 -14    3.61    0.66 
  -3   6  14    2.81    1.10 
  -3  -6  14    2.60    0.89 
  -3   6  13    7.64    0.86 
   3   6 -13    7.17    0.81 
  -3   6  13    7.42    1.02 
  -3  -6  13    5.88    1.13 
  -3   6  12    4.83    0.79 
  -3   6  12    3.66    0.67 
   3   6 -12    4.96    0.66 
  -3  -6  12    3.49    0.96 
  -3   6  11   20.45    1.13 
  -3   6  11   20.93    1.20 
   3   6 -11   18.69    1.00 
  -3   6  11   21.48    1.19 
  -3  -6  11   19.23    1.50 
  -3  -6  11   20.04    0.97 
  -3   6  10   12.18    0.91 
   3   6 -10   13.47    0.83 
  -3   6  10   11.08    0.87 
  -3   6  10   12.54    0.87 
  -3  -6  10   11.08    0.73 
  -3  -6  10   12.65    1.18 
  -3   6   9    2.14    0.45 
  -3   6   9    1.94    0.49 
   3   6  -9    2.46    0.51 
  -3   6   9    1.90    0.47 
  -3  -6   9    1.78    0.63 
  -3  -6   9    2.11    0.43 
  -3   6   8   47.99    1.60 
  -3   6   8   50.95    1.57 
   3   6  -8   51.79    1.63 
  -3   6   8   52.60    1.77 
  -3  -6   8   50.26    1.97 
  -3  -6   8   48.94    2.01 
  -3   6   7    1.18    0.40 
  -3   6   7    0.81    0.31 
  -3   6   7    1.18    0.39 
  -3   6   7    0.80    0.26 
   3   6  -7    0.51    0.35 
  -3  -6   7    0.58    0.30 
  -3  -6   7    0.84    0.47 
  -3  -6   7    0.54    0.37 
  -3   6   6   50.76    1.63 
  -3   6   6   50.80    1.31 
  -3   6   6   44.46    1.67 
  -3   6   6   51.32    1.65 
   3   6  -6   52.17    1.77 
  -3  -6   6   51.69    1.81 
  -3  -6   6   50.26    1.51 
  -3  -6   6   48.16    1.78 
  -3   6   5    1.90    0.42 
  -3   6   5    1.87    0.23 
   3   6  -5    2.44    0.42 
  -3   6   5    1.52    0.44 
  -3   6   5    2.01    0.32 
  -3  -6   5    2.30    0.40 
  -3  -6   5    1.24    0.39 
   3   6  -4  155.09    3.44 
  -3   6   4  157.94    3.62 
  -3   6   4  147.68    3.45 
  -3  -6   4  144.87    3.46 
   3  -6  -4  148.54    3.14 
  -3  -6   4  148.34    3.56 
  -3  -6   4  146.33    3.35 
   3   6  -3   76.46    1.98 
  -3   6   3   74.72    2.02 
  -3  -6   3   72.96    1.93 
  -3  -6   3   73.09    2.01 
  -3  -6   3   74.10    1.92 
   3   6  -2   72.65    1.91 
  -3   6   2   70.15    1.89 
  -3  -6   2   67.99    1.85 
  -3  -6   2   69.48    1.84 
   3  -6  -2   69.23    1.54 
   3  -6  -2   69.57    1.90 
  -3  -6   2   71.20    1.70 
   3   6  -1    2.77    0.45 
  -3   6   1    2.91    0.46 
  -3   6   1    1.84    0.25 
  -3  -6   1    2.28    0.24 
   3  -6  -1    2.12    0.39 
   3  -6  -1    2.44    0.25 
  -3  -6   1    2.48    0.39 
  -3   6   0    0.17    0.25 
  -3   6   0    0.10    0.18 
   3   6   0    0.32    0.25 
   3  -6   0    0.32    0.26 
  -3  -6   0    0.37    0.24 
   3  -6   0    0.08    0.15 
  -3  -6   0    0.27    0.13 
  -3   6  -1    3.16    0.42 
  -3   6  -1    1.57    0.31 
   3   6   1    1.56    0.35 
   3  -6   1    1.67    0.32 
   3  -6   1    1.89    0.30 
  -3  -6  -1    2.18    0.40 
  -3   6  -2   47.59    1.51 
   3   6   2   48.39    1.48 
  -3   6  -2   48.60    1.34 
   3  -6   2   47.52    1.35 
  -3  -6  -2   47.22    1.46 
   3  -6   2   48.32    1.37 
  -3   6  -3   38.33    1.11 
  -3   6  -3   37.97    1.40 
   3   6   3   37.61    1.28 
   3   6   3   38.28    0.98 
  -3  -6  -3   38.62    1.05 
  -3  -6  -3   36.34    1.26 
   3  -6   3   37.47    1.13 
  -3   6  -4    7.45    0.45 
  -3   6  -4    6.86    0.68 
  -3  -6  -4    6.95    0.56 
   3  -6   4    6.79    0.56 
  -3  -6  -4    7.78    0.49 
   3  -6   4    6.98    0.47 
   3   6   5   61.29    1.83 
  -3   6  -5   63.46    2.17 
   3   6   5   60.07    1.57 
  -3   6  -5   63.06    1.56 
  -3  -6  -5   61.70    1.75 
   3  -6   5   63.33    1.59 
  -3  -6  -5   64.33    1.87 
  -3   6  -6   28.58    1.46 
   3   6   6   27.15    0.95 
   3   6   6   28.14    1.14 
  -3   6  -6   27.71    0.89 
  -3  -6  -6   27.19    1.14 
   3  -6   6   27.98    0.90 
   3  -6   6   27.23    1.23 
  -3  -6  -6   27.14    1.25 
  -3   6  -7    5.99    0.43 
  -3   6  -7    7.60    0.98 
   3   6   7    6.12    0.49 
   3   6   7    5.70    0.61 
   3  -6   7    6.33    0.45 
  -3  -6  -7    6.75    0.68 
  -3   6  -8   21.86    1.48 
   3   6   8   24.02    1.01 
   3   6   8   25.97    1.13 
   3   6   8   23.97    1.11 
   3   6   9    0.16    0.35 
   3   6   9   -0.32    0.22 
  -3   6  -9    0.12    0.55 
   3   6  10    1.70    0.43 
  -3   6 -10    2.19    0.71 
  -3  -6 -10    3.25    0.68 
  -3   6 -11    9.83    1.41 
   3   6  11    8.44    0.76 
  -3  -6 -11   10.12    1.06 
  -3   6 -12    2.86    1.03 
   3   6  12    1.24    0.50 
  -3  -6 -12    2.41    0.77 
   3   6  13    2.89    0.58 
  -3   6 -13    3.19    1.03 
  -3  -6 -13    2.83    0.97 
  -3   6 -14   -0.07    0.70 
   3   6  14    0.23    0.46 
  -3  -6 -14   -0.43    0.59 
  -3   6 -15    2.46    0.96 
   3   6  15    1.89    0.62 
   3   6  17    1.08    1.12 
  -3   7  19    6.70    1.07 
  -3   7  19    3.83    1.07 
  -3   7  18    1.15    0.81 
  -3   7  18   -0.49    0.65 
   3   7 -17    2.02    0.69 
  -3   7  17    1.11    0.69 
  -3   7  17    2.02    0.69 
  -3  -7  17    0.15    0.83 
  -3   7  16    1.52    0.72 
  -3   7  16    0.69    0.57 
   3   7 -16    1.24    0.62 
  -3  -7  16    2.15    1.50 
  -3   7  15    4.13    0.84 
   3   7 -15    6.37    0.83 
  -3   7  15    5.77    0.99 
  -3  -7  15    3.46    1.02 
   3   7 -14   11.36    0.90 
  -3   7  14   12.02    1.09 
  -3   7  14   10.82    1.05 
  -3  -7  14   11.57    1.43 
  -3   7  13   24.23    1.56 
   3   7 -13   21.14    1.15 
  -3   7  13   22.36    1.33 
  -3  -7  13   21.48    1.73 
  -3   7  12    0.33    0.40 
  -3   7  12    0.26    0.42 
  -3   7  12    0.22    0.43 
   3   7 -12    0.21    0.38 
  -3  -7  12    0.51    0.96 
  -3   7  11    0.42    0.45 
  -3   7  11    0.40    0.38 
   3   7 -11    0.03    0.32 
  -3  -7  11    0.72    0.61 
   3   7 -10    3.93    0.65 
  -3   7  10    3.99    0.59 
  -3   7  10    4.21    0.56 
  -3   7  10    2.86    0.63 
  -3  -7  10    2.71    0.77 
  -3   7   9   33.10    1.26 
   3   7  -9   34.60    1.34 
  -3   7   9   35.11    1.25 
  -3   7   9   32.75    1.47 
  -3  -7   9   31.97    1.71 
  -3  -7   9   32.07    1.26 
  -3   7   8    3.12    0.43 
   3   7  -8    3.52    0.59 
  -3   7   8    2.48    0.56 
  -3   7   8    3.21    0.48 
  -3  -7   8    3.85    0.67 
  -3  -7   8    3.30    0.52 
  -3  -7   8    3.21    0.75 
  -3   7   7    9.79    0.61 
  -3   7   7    9.46    0.78 
   3   7  -7   10.90    0.74 
  -3   7   7   10.64    0.53 
  -3  -7   7   12.14    0.96 
  -3  -7   7   11.14    0.71 
  -3  -7   7   10.65    0.89 
  -3   7   6    0.21    0.33 
  -3   7   6   -0.16    0.26 
   3   7  -6    0.16    0.28 
  -3  -7   6    0.40    0.33 
  -3  -7   6    0.48    0.26 
  -3  -7   6    0.44    0.26 
  -3   7   5   47.69    1.65 
   3   7  -5   51.55    1.60 
  -3   7   5   51.40    1.66 
  -3  -7   5   50.72    1.73 
  -3  -7   5   47.95    1.74 
  -3  -7   5   49.14    1.69 
  -3   7   4   16.36    0.86 
  -3   7   4   16.21    0.88 
   3   7  -4   15.87    0.83 
  -3  -7   4   15.21    0.82 
  -3  -7   4   15.90    0.87 
   3   7  -3    9.18    0.64 
  -3   7   3   10.36    0.68 
  -3  -7   3   10.05    0.75 
  -3  -7   3    8.69    0.61 
  -3  -7   3    9.49    0.58 
   3   7  -2   21.36    0.95 
  -3  -7   2   22.38    0.96 
   3  -7  -2   20.82    0.94 
  -3  -7   2   21.99    0.76 
  -3  -7   2   22.55    0.93 
  -3   7   1    3.45    0.31 
   3   7  -1    2.99    0.44 
  -3   7   1    3.73    0.52 
   3  -7  -1    3.36    0.45 
   3  -7  -1    2.73    0.25 
  -3  -7   1    3.24    0.44 
  -3  -7   1    2.72    0.34 
  -3   7   0    4.17    0.44 
   3   7   0    4.03    0.47 
  -3   7   0    3.65    0.37 
   3  -7   0    3.06    0.41 
  -3  -7   0    3.78    0.60 
   3  -7   0    3.25    0.34 
  -3   7  -1    0.42    0.26 
   3   7   1    0.91    0.34 
  -3   7  -1    0.54    0.26 
   3  -7   1    0.58    0.20 
   3  -7   1    0.65    0.30 
   3   7   2    4.16    0.53 
  -3   7  -2    4.46    0.50 
  -3   7  -2    3.99    0.54 
   3  -7   2    4.15    0.38 
   3  -7   2    3.46    0.45 
  -3  -7  -2    3.54    0.55 
  -3   7  -3   -0.31    0.24 
  -3   7  -3   -0.03    0.21 
   3   7   3   -0.21    0.27 
   3  -7   3    0.04    0.18 
  -3  -7  -3    0.02    0.27 
   3  -7   3    0.24    0.25 
  -3   7  -4   20.96    0.83 
  -3   7  -4   20.51    1.15 
   3   7   4   19.67    0.98 
  -3  -7  -4   20.44    0.97 
   3  -7   4   21.33    0.86 
  -3   7  -5    1.28    0.45 
  -3   7  -5    0.45    0.27 
   3   7   5    0.78    0.22 
   3   7   5    0.94    0.36 
  -3  -7  -5    0.56    0.33 
   3  -7   5    0.83    0.32 
   3  -7   5    0.68    0.31 
  -3  -7  -5    0.78    0.30 
  -3   7  -6    2.85    0.41 
  -3   7  -6    2.74    0.69 
   3   7   6    2.87    0.37 
   3   7   6    2.35    0.49 
   3  -7   6    2.47    0.41 
   3  -7   6    3.16    0.53 
  -3  -7  -6    2.88    0.49 
  -3  -7  -6    2.05    0.49 
  -3   7  -7   16.30    1.24 
   3   7   7   16.10    0.95 
  -3   7  -7   17.37    0.73 
   3   7   7   16.28    0.74 
   3  -7   7   16.40    0.74 
  -3  -7  -7   14.55    0.91 
   3   7   8    3.45    0.45 
  -3   7  -8    2.45    0.70 
  -3   7  -8    3.57    0.43 
   3   7   8    2.42    0.52 
  -3  -7  -8    2.40    0.55 
   3  -7   8    3.35    0.44 
  -3   7  -9    4.36    0.93 
   3   7   9    5.35    0.61 
   3   7   9    3.82    0.62 
   3  -7   9    5.43    0.46 
  -3  -7  -9    4.35    0.72 
   3   7  10    0.58    0.42 
   3   7  10    0.08    0.29 
  -3   7 -10    0.18    0.58 
  -3  -7 -10    0.38    0.45 
  -3   7 -11   26.72    1.89 
   3   7  11   23.04    1.23 
  -3  -7 -11   25.26    1.49 
  -3   7 -12    5.69    1.27 
   3   7  12    4.58    0.73 
  -3  -7 -12    6.11    1.03 
  -3   7 -13   13.81    1.61 
   3   7  13   18.06    1.12 
  -3  -7 -13   16.87    1.43 
   3   7  14    5.43    1.43 
  -3   7 -15    5.81    1.40 
   3   7  15    3.29    0.93 
   3   7  15    3.38    0.75 
   3   7  16    4.16    1.17 
   3   7  16    4.18    1.25 
   3   7  17    9.33    1.59 
  -3   8  18    3.49    0.91 
  -3   8  18    1.76    0.74 
  -3   8  17    9.29    1.30 
   3   8 -17    9.53    1.26 
  -3   8  17   12.96    1.42 
   3   8 -16    5.52    0.89 
  -3   8  16    3.39    0.80 
  -3   8  16    7.55    1.10 
  -3  -8  16    6.31    1.38 
  -3   8  15    0.54    0.54 
   3   8 -15    0.39    0.52 
  -3   8  15    0.21    0.59 
  -3  -8  15    0.68    0.77 
  -3   8  14    0.42    0.50 
  -3   8  14   -0.26    0.47 
   3   8 -14    0.51    0.52 
  -3  -8  14    1.15    0.79 
  -3   8  13    3.68    0.75 
   3   8 -13    5.05    0.74 
  -3   8  13    5.19    0.75 
  -3  -8  13    4.77    1.14 
   3   8 -12   98.53    2.74 
  -3   8  12   94.50    2.72 
  -3   8  12   94.36    2.64 
  -3   8  12   91.33    2.96 
  -3  -8  12   96.47    3.58 
  -3   8  11    9.80    0.88 
  -3   8  11   12.13    0.78 
  -3   8  11    9.80    0.95 
   3   8 -11   11.05    0.87 
  -3  -8  11   12.90    1.28 
  -3   8  10   30.73    1.20 
  -3   8  10   31.04    1.19 
  -3   8  10   31.18    1.52 
   3   8 -10   34.19    1.40 
  -3  -8  10   34.60    1.87 
   3   8  -9    1.72    0.51 
  -3   8   9    0.72    0.50 
  -3   8   9    0.38    0.25 
  -3   8   9    1.08    0.32 
  -3  -8   9   -0.15    0.49 
  -3   8   8    6.23    0.43 
   3   8  -8    5.57    0.64 
  -3   8   8    6.54    0.50 
  -3   8   8    6.55    0.76 
  -3  -8   8    6.73    0.95 
   3   8  -7    0.19    0.31 
  -3   8   7   -0.10    0.39 
  -3  -8   7    0.31    0.28 
  -3  -8   7    0.51    0.42 
  -3  -8   7    0.77    0.64 
   3   8  -6   37.67    1.41 
  -3   8   6   37.95    1.51 
  -3  -8   6   36.19    1.79 
  -3  -8   6   36.30    1.53 
  -3  -8   6   36.36    1.35 
  -3   8   5    0.51    0.34 
   3   8  -5    0.85    0.39 
  -3  -8   5    1.40    0.38 
  -3  -8   5    1.28    0.42 
  -3  -8   5    1.65    0.47 
  -3   8   4   12.67    0.82 
   3   8  -4   13.01    0.80 
  -3  -8   4   12.12    0.76 
  -3  -8   4   13.35    0.77 
  -3  -8   4   12.98    0.80 
  -3   8   3   12.45    0.79 
   3   8  -3   11.85    0.76 
  -3  -8   3   11.09    0.69 
  -3  -8   3   11.46    0.63 
  -3  -8   3   11.55    0.72 
   3  -8  -3   11.22    0.76 
  -3   8   2   17.02    0.90 
   3   8  -2   18.21    0.92 
  -3  -8   2   17.84    0.89 
  -3  -8   2   17.37    1.12 
   3  -8  -2   17.89    0.92 
  -3  -8   2   17.89    0.66 
   3   8  -1    2.65    0.48 
  -3   8   1    3.22    0.50 
   3  -8  -1    2.63    0.46 
  -3  -8   1    2.85    0.47 
  -3   8   0    6.18    0.55 
  -3   8   0    5.93    0.48 
   3   8   0    6.67    0.61 
  -3  -8   0    6.66    0.59 
  -3   8  -1    6.44    0.65 
   3   8   1    5.34    0.57 
  -3   8  -1    6.36    0.55 
  -3  -8  -1    6.13    0.58 
   3  -8   1    4.90    0.52 
   3  -8   1    6.93    0.44 
   3   8   2  229.21    4.98 
  -3   8  -2  233.12    5.05 
  -3   8  -2  214.89    4.91 
  -3  -8  -2  210.96    4.90 
   3  -8   2  220.25    4.79 
   3  -8   2  217.71    4.64 
  -3   8  -3   20.79    1.09 
  -3   8  -3   22.37    0.93 
   3   8   3   22.78    1.07 
   3  -8   3   22.19    0.92 
  -3  -8  -3   16.54    1.42 
   3  -8   3   22.11    0.95 
  -3   8  -4   23.54    1.45 
   3   8   4   25.09    1.16 
  -3   8  -4   25.56    0.99 
   3  -8   4   24.55    1.05 
   3  -8   4   26.00    1.03 
  -3   8  -5   96.77    2.99 
  -3   8  -5   96.32    2.38 
   3   8   5   95.20    2.69 
   3  -8   5   99.66    2.44 
  -3   8  -6   10.36    1.00 
  -3   8  -6    9.81    0.64 
   3   8   6   11.53    0.86 
   3  -8   6   10.17    0.67 
   3   8   7    1.76    0.49 
   3   8   7    1.94    0.35 
  -3   8  -7    1.60    0.63 
  -3   8  -7    0.85    0.34 
  -3  -8  -7    1.47    0.43 
   3  -8   7    1.07    0.37 
   3   8   8    8.55    0.79 
  -3   8  -8    7.78    0.56 
  -3   8  -8    8.56    1.14 
   3   8   8    7.11    0.54 
   3  -8   8    8.57    0.59 
  -3  -8  -8    6.90    0.72 
   3   8   9   10.89    0.67 
  -3   8  -9    9.36    0.60 
   3   8   9   10.78    0.89 
  -3   8  -9   10.88    1.21 
   3  -8   9   10.29    0.63 
   3   8  10    0.32    0.29 
  -3   8 -10    0.17    0.28 
  -3   8 -10   -0.14    0.56 
   3   8  10    0.09    0.41 
  -3  -8 -10   -0.68    0.36 
   3  -8  10    0.60    0.34 
   3   8  11    1.02    0.50 
  -3   8 -11    0.22    0.60 
  -3   8 -12    7.46    1.41 
   3   8  13    1.29    0.61 
  -3   8 -13    3.41    1.11 
   3   8  14    5.64    1.07 
  -3   8 -14    7.36    1.43 
   3   8  14    6.75    0.90 
   3   8  15    2.41    0.99 
   3   8  15    0.95    0.61 
   3   8  16    0.70    0.98 
  -3   9  17    2.64    0.78 
   3   9 -16    2.94    0.86 
  -3   9  16    4.11    0.82 
  -3   9  16    2.86    0.98 
  -3  -9  16    3.06    1.18 
  -3   9  15   -0.25    0.56 
  -3   9  15   -0.03    0.49 
  -3  -9  15    1.04    0.94 
   3   9 -14   43.79    1.74 
  -3   9  14   44.80    2.03 
  -3   9  14   44.71    1.76 
  -3  -9  14   41.79    2.52 
  -3   9  13   19.84    1.08 
   3   9 -13   19.63    1.17 
  -3   9  13   20.73    1.36 
  -3  -9  13   20.39    1.72 
  -3   9  12    4.44    0.82 
  -3   9  12    4.14    0.63 
   3   9 -12    3.90    0.72 
  -3  -9  12    3.80    0.95 
  -3   9  11   90.99    2.31 
  -3   9  11   88.56    2.32 
   3   9 -11   87.62    2.64 
  -3   9  11   84.85    2.86 
  -3  -9  11   93.98    4.59 
   3   9 -10   25.56    1.26 
  -3   9  10   24.67    0.93 
  -3  -9  10   25.52    1.69 
   3   9  -9    6.35    0.72 
  -3   9   9    6.02    0.81 
  -3  -9   9    7.18    1.07 
   3   9  -8   10.35    0.83 
  -3   9   8    9.17    0.86 
  -3  -9   8   10.05    1.00 
   3   9  -7    7.39    0.74 
  -3   9   7    7.08    0.76 
  -3  -9   7    6.65    0.76 
  -3  -9   7    7.32    0.82 
   3   9  -6    0.15    0.35 
  -3   9   6    0.24    0.32 
  -3  -9   6   -0.01    0.40 
  -3  -9   6    0.06    0.39 
  -3   9   5    0.35    0.33 
   3   9  -5    0.27    0.37 
  -3  -9   5    0.77    0.38 
  -3  -9   5    0.50    0.36 
   3   9  -4    3.13    0.57 
  -3   9   4    3.20    0.58 
  -3  -9   4    2.51    0.45 
  -3  -9   4    2.61    0.48 
  -3   9   3   25.59    1.19 
   3   9  -3   26.22    1.17 
  -3  -9   3   24.07    1.02 
  -3  -9   3   25.71    0.95 
  -3   9   2    5.29    0.60 
   3   9  -2    5.94    0.63 
   3   9  -1    0.75    0.37 
  -3   9   1    1.45    0.40 
   3  -9  -1    0.87    0.38 
  -3   9   0    0.00    0.27 
  -3   9   0    0.00    0.23 
   3   9   0    0.38    0.35 
   3  -9   0    0.35    0.33 
  -3   9  -1    7.79    0.64 
   3   9   1    7.54    0.70 
  -3   9  -1    6.90    0.60 
   3  -9   1    6.78    0.62 
   3  -9   1    7.41    0.48 
  -3   9  -2   19.46    1.03 
   3   9   2   19.16    1.05 
  -3   9  -2   20.52    0.97 
   3  -9   2   21.31    1.02 
   3  -9   2   21.28    0.85 
   3   9   3  128.44    3.31 
  -3   9  -3  123.71    3.05 
  -3   9  -3  127.57    3.35 
   3  -9   3  123.37    3.09 
   3  -9   3  126.21    3.00 
   3   9   4   24.66    1.21 
  -3   9  -4   24.79    1.32 
  -3   9  -4   24.74    1.05 
   3  -9   4   24.60    1.09 
   3   9   5    4.09    0.66 
  -3   9  -5    4.57    0.53 
  -3   9  -5    4.67    0.78 
   3  -9   5    5.70    0.58 
   3  -9   5    4.43    0.69 
  -3   9  -6   40.13    1.36 
  -3   9  -6   39.32    1.87 
   3   9   6   38.36    1.61 
  -3   9  -7   24.71    1.04 
   3   9   7   22.22    1.23 
  -3   9  -7   21.52    1.49 
   3  -9   7   22.45    1.07 
   3   9   8    3.99    0.71 
  -3   9  -8    4.71    0.96 
   3  -9   8    4.31    0.54 
  -3   9  -9   -0.15    0.40 
  -3   9  -9   -0.96    0.95 
   3   9   9    0.05    0.46 
   3   9   9    0.27    0.26 
   3  -9   9    0.52    0.36 
  -3   9 -10   12.06    1.60 
  -3   9 -10   10.70    0.68 
   3  -9  10   12.01    0.70 
  -3   9 -11    2.13    0.91 
   3   9  11    1.87    0.62 
   3   9  11    1.08    0.52 
   3   9  12    0.32    0.55 
  -3   9 -12    0.37    0.69 
   3   9  12    0.80    0.58 
   3   9  13   14.36    1.16 
   3   9  13   16.15    1.40 
  -3   9 -13   18.74    2.10 
  -3   9 -14    2.12    1.02 
   3   9  14    1.08    0.63 
   3   9  14    1.35    0.92 
   3   9  15    3.12    0.78 
  -3  10  16    1.02    0.69 
   3  10 -16   -0.56    0.85 
   3  10 -15    8.88    1.09 
  -3 -10  15   10.63    1.55 
   3  10 -14    5.28    0.86 
  -3  10  14    5.51    0.66 
  -3  10  14    3.54    0.83 
  -3 -10  14    5.76    1.19 
  -3  10  13    1.00    0.64 
  -3  10  13    0.83    0.40 
  -3 -10  13    0.88    0.77 
  -3  10  12    8.41    1.16 
   3  10 -12    7.86    0.86 
  -3 -10  12   10.62    1.44 
  -3  10  11   21.44    1.38 
   3  10 -11   20.64    1.21 
  -3 -10  11   25.00    1.69 
   3  10 -10    0.76    0.48 
  -3  10  10    0.65    0.42 
  -3 -10  10    1.52    0.67 
  -3  10   9    5.69    0.92 
   3  10  -9    5.74    0.85 
  -3 -10   9    7.06    1.06 
   3  10  -8   15.22    0.99 
  -3 -10   8   13.32    1.12 
  -3  10   7    7.12    0.81 
   3  10  -7    7.49    0.86 
  -3 -10   7    7.66    0.94 
  -3 -10   7    7.02    0.80 
   3  10  -6   55.63    1.92 
  -3  10   6   52.39    1.98 
  -3 -10   6   54.92    1.95 
  -3 -10   6   52.97    1.92 
   3  10  -5   10.75    0.85 
  -3  10   5   10.78    0.89 
  -3 -10   5   10.52    0.79 
  -3 -10   5   10.65    0.78 
   3  10  -4   26.64    1.28 
  -3  10   4   27.91    1.34 
  -3 -10   4   26.48    1.09 
  -3 -10   4   28.73    1.15 
  -3  10   3    7.98    0.77 
   3  10  -3    5.88    0.67 
  -3 -10   3    7.21    0.57 
  -3 -10   3    7.10    0.50 
  -3  10   2   17.11    1.01 
   3  10  -2   17.17    1.01 
  -3  10   1   10.50    0.81 
   3  10  -1    9.49    0.81 
   3  10   0   32.77    1.42 
  -3  10   0   33.29    1.36 
   3  10   1   12.73    0.91 
  -3  10  -1   11.64    0.77 
  -3  10  -1   12.24    0.82 
   3 -10   1   12.93    0.62 
  -3  10  -2   19.58    1.00 
   3  10   2   19.72    1.13 
  -3  10  -2   20.91    1.09 
   3 -10   2   19.97    0.84 
   3  10   3    2.06    0.54 
  -3  10  -3    2.39    0.60 
  -3  10  -3    2.63    0.53 
   3 -10   3    2.23    0.38 
  -3  10  -4    0.01    0.29 
  -3  10  -4   -0.60    0.35 
   3  10   4   -0.59    0.33 
   3 -10   4    0.25    0.28 
   3 -10   4    0.00    0.46 
   3  10   5    0.17    0.39 
  -3  10  -5    0.99    0.40 
  -3  10  -5   -0.37    0.37 
   3 -10   5    1.05    0.41 
   3 -10   5    1.14    0.44 
  -3  10  -6    0.93    0.39 
  -3  10  -6   -0.22    0.45 
   3  10   6    0.47    0.45 
   3 -10   6    0.92    0.41 
   3  10   7   16.55    1.15 
  -3  10  -7   15.76    0.88 
  -3  10  -7   15.82    1.35 
   3 -10   7   17.32    0.93 
   3  10   8   -0.18    0.41 
  -3  10  -8    0.57    0.33 
  -3  10  -8    0.37    0.53 
   3 -10   8    0.32    0.39 
  -3  10  -9    0.05    0.34 
  -3  10  -9   -0.32    0.52 
   3  10   9    0.11    0.53 
   3 -10   9    0.95    0.39 
   3  10  10    0.44    0.52 
  -3  10 -10    0.13    0.42 
  -3  10 -10    1.62    0.79 
  -3  10 -11    2.87    1.01 
   3  10  11    2.35    0.66 
   3  10  12    2.05    0.65 
   3  10  12    1.46    0.63 
  -3  10 -12    2.24    0.99 
   3  10  13    2.58    0.68 
  -3  10 -13    5.20    1.26 
   3  10  14    0.34    0.59 
   3  10  15    1.41    0.90 
  -3  11  15    1.33    0.70 
   3  11 -15    0.00    0.73 
  -3 -11  15    0.32    0.90 
   3  11 -14    4.81    0.91 
  -3  11  14    3.91    0.94 
  -3 -11  14    4.69    1.23 
   3  11 -13   -0.35    0.50 
  -3  11  13    0.45    0.57 
  -3 -11  13    0.62    0.75 
  -3  11  12    0.06    0.50 
   3  11 -12    1.08    0.56 
  -3 -11  12   -0.22    0.63 
   3  11 -11    2.41    0.62 
  -3  11  11    1.27    0.65 
  -3 -11  11    1.86    0.79 
  -3  11  10    2.23    0.70 
  -3 -11  10    0.88    0.67 
  -3  11   9    5.37    0.87 
   3  11  -9    5.24    0.85 
  -3 -11   9    5.70    0.95 
   3  11  -8   15.33    1.07 
  -3  11   8   16.02    1.18 
  -3 -11   8   16.19    1.19 
  -3  11   7    0.19    0.42 
   3  11  -7    0.03    0.39 
  -3 -11   7    0.32    0.42 
  -3  11   6   16.96    1.80 
   3  11  -6   15.18    1.06 
  -3 -11   6   13.59    0.96 
  -3 -11   6   16.29    1.01 
  -3  11   5   12.01    0.97 
   3  11  -5   10.38    0.89 
  -3 -11   5   11.69    0.80 
  -3 -11   5   11.93    0.94 
   3  11  -4   11.98    0.93 
  -3  11   4   11.76    0.95 
  -3 -11   4   11.34    0.70 
  -3 -11   4   12.69    0.75 
   3  11  -3   18.48    1.10 
  -3  11   3   19.34    1.15 
  -3 -11   3   18.23    0.74 
   3  11  -2   39.79    1.65 
  -3  11   2   41.61    1.67 
   3  11  -1    0.18    0.37 
  -3  11   1    0.46    0.39 
   3  11   0   80.20    2.54 
  -3  11   0   81.70    2.45 
   3  11   1    0.37    0.44 
  -3  11  -1   -0.12    0.32 
  -3  11  -1    0.30    0.35 
   3 -11   1    0.07    0.20 
   3  11   2    0.08    0.37 
  -3  11  -2    0.02    0.35 
  -3  11  -2    0.19    0.36 
   3 -11   2   -0.01    0.21 
   3  11   3   17.70    1.13 
  -3  11  -3   17.42    1.24 
  -3  11  -3   18.44    1.01 
   3 -11   3   17.02    0.84 
  -3  11  -4    8.06    0.89 
  -3  11  -4    7.78    0.71 
   3  11   4    8.49    0.95 
   3 -11   4    7.20    0.64 
   3  11   5   22.51    1.53 
  -3  11  -5   24.34    1.44 
  -3  11  -5   21.50    1.09 
   3  11   6    3.90    0.74 
  -3  11  -6    5.58    0.96 
  -3  11  -6    6.31    0.78 
  -3  11  -7    8.77    1.26 
   3  11   7    8.54    0.90 
  -3  11  -7    9.78    0.79 
   3  11   8    6.98    0.92 
  -3  11  -8    8.38    1.24 
  -3  11  -8    6.80    0.69 
  -3  11  -9   16.51    0.96 
  -3  11  -9   14.98    1.46 
   3  11   9   15.72    1.18 
  -3  11 -10    9.88    1.41 
   3  11  10   10.19    1.02 
  -3  11 -10   10.62    0.80 
  -3  11 -11   -1.07    0.55 
   3  11  11    0.42    0.56 
  -3  11 -11   -0.16    0.51 
  -3  11 -12    7.67    1.69 
   3  11  12    4.46    0.78 
  -3  11 -13    3.50    1.18 
   3  11  13    0.91    0.81 
   3  11  14    2.03    0.78 
   3  11  15    3.77    1.43 
   3  12 -15   -1.60    0.78 
   3  12 -14    0.24    0.67 
  -3  12  14    0.28    0.62 
  -3 -12  14    0.21    0.93 
   3  12 -13    1.53    0.64 
  -3  12  13    2.36    0.76 
  -3 -12  13    3.78    1.09 
  -3  12  12    7.93    1.33 
   3  12 -12    6.11    0.96 
  -3 -12  12    8.09    1.26 
  -3  12  11    3.45    0.77 
   3  12 -11    2.50    0.74 
  -3 -12  11    2.48    0.80 
   3  12 -10   -0.21    0.46 
  -3  12  10    0.34    0.53 
  -3 -12  10    1.06    0.62 
  -3  12   9    0.48    0.49 
   3  12  -9   -0.18    0.42 
  -3 -12   9    0.96    0.57 
  -3  12   8    1.13    0.55 
   3  12  -8    0.30    0.51 
  -3 -12   8    1.16    0.55 
  -3  12   7   13.74    1.12 
   3  12  -7   15.91    1.13 
  -3 -12   7   15.43    1.08 
  -3  12   6    1.31    0.57 
   3  12  -6    0.25    0.52 
  -3 -12   6    0.97    0.48 
  -3 -12   6    1.11    0.43 
   3  12  -5    0.50    0.77 
  -3  12   5    1.09    0.52 
  -3 -12   5    2.06    0.44 
  -3  12   4    4.24    0.71 
  -3 -12   4    4.31    0.48 
  -3  12   2    0.30    0.41 
  -3  12   1   20.10    1.19 
   3  12   0   22.88    1.45 
  -3  12   0   25.81    1.29 
  -3  12  -1    1.67    0.51 
   3  12   1    2.22    0.61 
  -3  12  -2    8.17    0.80 
   3  12   2    7.86    0.85 
   3 -12   2    7.61    0.56 
   3  12   3    1.54    0.56 
  -3  12  -3    1.83    0.53 
   3 -12   3    2.23    0.43 
  -3  12  -4   14.39    1.11 
   3  12   4   19.24    1.25 
  -3  12  -4   16.64    1.03 
   3 -12   4   16.97    0.94 
   3  12   5    0.96    0.48 
  -3  12  -5    0.21    0.41 
  -3  12  -5    0.20    0.50 
  -3  12  -6    6.22    0.72 
   3  12   6    9.04    0.95 
  -3  12  -6    6.73    1.05 
   3  12   7    7.38    1.01 
  -3  12  -7   11.58    1.24 
  -3  12  -7   11.81    0.89 
  -3  12  -8    6.60    1.17 
   3  12   8    4.56    0.80 
  -3  12  -8    6.23    0.71 
  -3  12  -9    1.48    0.72 
  -3  12  -9    0.64    0.51 
   3  12   9    1.01    0.57 
  -3  12 -10    1.24    0.56 
  -3  12 -10    0.34    0.65 
   3  12  10    0.52    0.57 
  -3  12 -11    4.63    0.83 
   3  12  11    5.14    0.92 
  -3  12 -11    6.44    1.27 
   3  12  12   12.15    1.24 
   3  12  13    3.02    0.79 
   3  13 -14    0.22    0.90 
  -3 -13  14    1.60    1.08 
   3  13 -13    2.06    0.85 
  -3 -13  13    2.80    1.90 
   3  13 -12    1.57    0.69 
  -3  13  12    1.19    0.69 
  -3 -13  12   -0.25    0.82 
   3  13 -11   -0.58    0.52 
  -3  13  11    1.91    0.65 
  -3 -13  11   -0.49    0.71 
   3  13 -10    3.36    0.79 
  -3  13  10    3.26    0.83 
  -3 -13  10    3.30    0.89 
  -3  13   9   15.80    1.27 
   3  13  -9   11.85    1.06 
  -3 -13   9   14.21    1.25 
   3  13  -8    5.53    0.88 
  -3  13   8    4.43    0.84 
  -3 -13   8    6.65    0.92 
   3  13  -7    5.25    0.87 
  -3  13   7    5.10    0.85 
  -3 -13   7    6.63    0.80 
   3  13  -6   10.51    1.00 
  -3  13   6    9.13    0.98 
  -3 -13   6    8.98    0.80 
  -3 -13   6   13.47    1.01 
  -3  13   5   13.02    1.11 
   3  13  -5   16.21    1.17 
  -3 -13   5   15.71    0.91 
   3  13  -4    9.35    0.93 
  -3  13   4   12.37    1.04 
   3  13  -3   13.70    1.07 
  -3  13   3   14.40    1.13 
  -3  13   2    0.02    0.46 
   3  13  -2   -0.05    0.41 
  -3  13   1    6.01    0.85 
   3  13  -1    4.26    0.80 
  -3  13   0    0.44    0.45 
   3  13   0    0.42    0.49 
  -3  13  -1    7.98    0.84 
   3  13   1    7.64    0.96 
   3  13   2    0.85    0.51 
  -3  13  -2    1.42    0.73 
   3  13   3    1.98    0.65 
   3 -13   3    1.86    0.42 
   3  13   4   15.73    1.19 
  -3  13  -4   15.44    1.23 
   3 -13   4   17.11    1.01 
   3  13   5    4.92    0.86 
  -3  13  -5    4.94    0.76 
  -3  13  -6    8.22    0.86 
   3  13   6    9.09    1.02 
   3  13   7   -0.25    0.43 
  -3  13  -7    0.41    0.44 
   3  13   8    4.24    0.84 
  -3  13  -8    4.53    0.75 
   3  13   9    2.37    0.70 
  -3  13  -9    1.69    0.62 
   3  13  10    1.01    0.64 
  -3  13 -10    0.81    0.67 
   3  13  11    1.35    0.73 
   3  14 -14    2.77    1.27 
  -3 -14  13   -0.86    0.93 
   3  14 -12    1.03    0.73 
  -3 -14  12    0.79    1.04 
  -3  14  11    1.32    1.10 
   3  14 -11    0.69    0.72 
  -3 -14  11    0.20    0.82 
  -3  14  10   -0.21    0.54 
   3  14 -10    0.62    0.62 
  -3 -14  10    1.11    0.84 
   3  14  -9    1.54    0.67 
  -3  14   9    2.35    0.78 
   3  14  -8    2.78    0.70 
  -3  14   8    2.64    0.79 
  -3 -14   8    3.09    0.76 
  -3  14   7    0.43    0.56 
   3  14  -7    0.34    0.51 
  -3 -14   7    0.84    0.53 
  -3  14   6   19.94    1.41 
   3  14  -6   20.67    1.37 
  -3 -14   6   22.16    1.09 
   3  14  -5   -0.24    0.48 
  -3  14   5    0.30    0.47 
   3  14  -4   20.06    1.33 
  -3  14   4   20.76    1.38 
  -3  14   3   10.86    1.05 
   3  14  -3    8.60    0.95 
  -3  14   2    6.93    0.91 
   3  14  -2    7.14    0.95 
  -3  14   1   13.74    1.10 
   3  14  -1   13.57    1.13 
  -3  14   0    1.06    0.55 
   3  14   0    1.12    0.54 
  -3  14  -1    6.05    0.94 
   3  14   1    8.30    0.98 
  -3  14  -2    4.78    0.85 
   3  14   2    4.03    0.83 
   3  14   3    1.38    0.60 
  -3  14  -3    1.45    0.54 
   3  14   4    5.70    0.94 
  -3  14  -4    5.55    0.85 
   3 -14   4    5.52    0.84 
   3  14   5    1.52    0.62 
  -3  14  -5    2.04    0.64 
   3 -14   5    1.41    0.74 
   3  14   6    0.84    0.53 
  -3  14  -6    0.32    0.54 
   3 -14   6    0.13    0.77 
  -3  14  -7    0.10    0.52 
  -3  14  -8    0.76    0.59 
   3  14   8    0.66    0.62 
   3 -14   8   -0.55    0.89 
   3  14   9    6.17    1.04 
  -3  14  -9    5.52    0.95 
   3 -14   9    7.57    1.40 
   3 -14  10    0.35    1.17 
   3 -14  11    0.50    1.23 
   3  15 -13    0.65    1.34 
  -3 -15  13   -1.20    1.52 
   3  15 -11    5.12    1.04 
  -3 -15  11   10.71    1.55 
   3  15 -10    1.89    0.91 
  -3 -15  10    4.05    1.12 
  -3  15   9    6.09    1.70 
  -3 -15   9    5.97    1.09 
   3  15  -8    1.85    0.75 
  -3  15   8    0.46    0.56 
  -3 -15   8    0.44    0.68 
   3  15  -7   24.03    1.53 
  -3  15   7   21.94    1.54 
  -3 -15   7   21.32    1.26 
   3  15  -6    1.06    0.62 
  -3  15   6    1.00    0.69 
   3  15  -5    5.09    0.87 
  -3  15   5    2.30    0.77 
   3  15  -4   10.15    1.08 
  -3  15   4    9.99    1.06 
  -3  15   3    0.79    0.51 
   3  15  -3    1.11    0.63 
  -3  15   2    2.89    0.73 
   3  15  -2    2.41    0.72 
   3  15  -1    1.07    0.59 
  -3  15   1    0.63    0.60 
  -3  15   0    2.73    0.67 
   3  15   0    5.25    0.97 
   3  15   1    1.28    0.66 
  -3  15  -1    0.98    0.54 
  -3  15  -2    3.19    0.76 
   3  15   2    3.02    0.74 
  -3  15  -3   11.19    1.03 
   3  15   3   14.47    1.40 
   3  15   4    0.56    0.73 
  -3  15  -4   -0.07    0.53 
   3  15   5    7.47    1.14 
  -3  15  -5    8.18    0.94 
   3 -15   5    9.92    1.26 
   3  15   6   22.49    1.58 
  -3  15  -6   21.66    1.38 
   3 -15   6   23.26    1.76 
   3  15   7   12.43    1.27 
  -3  15  -7   13.92    1.18 
   3 -15   7   12.26    1.61 
  -3  15  -8    1.72    0.83 
   3 -15   8    0.67    1.16 
  -3  15  -9    0.18    0.87 
   3 -15   9   -1.76    1.15 
   3 -15  10   30.35    3.28 
   3 -15  11   11.17    3.51 
   3  16  -9    3.83    0.90 
   3  16  -8    5.29    1.00 
   3  16  -7    6.33    1.05 
  -3  16   6   21.13    1.82 
   3  16  -6   19.71    1.49 
  -3  16   5    3.59    0.82 
   3  16  -5    3.48    0.84 
  -3  16   4    0.17    0.55 
   3  16  -4    0.24    0.67 
  -3  16   3    2.94    0.79 
   3  16  -3    2.48    0.73 
  -3  16   2    3.73    0.90 
   3  16  -2    2.65    0.76 
   3  16  -1   11.77    1.19 
  -3  16   0    0.90    0.57 
   3  16   0   -0.60    0.63 
  -3  16  -1   28.74    1.64 
  -3  16  -2    0.71    0.59 
   3  16   2    0.50    0.55 
  -3  16  -3    0.39    0.64 
   3  16   3    0.16    0.63 
   3  16   4    0.96    0.86 
  -3  16  -4    1.95    0.69 
  -3  16  -5    3.34    0.84 
  -3  16  -6    0.63    0.75 
  -3  16  -7    1.41    0.81 
  -3  16  -8   -0.42    0.91 
  -3  17   1   10.61    1.18 
  -3  17   0    0.51    0.67 
  -3  17  -1    2.46    0.70 
  -3  17  -2    4.26    0.91 
  -3  17  -3    1.78    0.77 
  -3  17  -4    1.86    0.80 
  -3  17  -5    3.93    0.92 
  -3  17  -6   -0.70    0.76 
  -3  17  -7   -0.91    1.01 
  -4   0  20    1.29    0.89 
  -4   0  19    0.62    0.60 
  -4   0  19   -0.55    0.82 
  -4   0  18   13.46    1.84 
  -4   0  17    0.92    0.72 
   4   0 -16    5.57    0.81 
  -4   0  16    3.96    1.02 
  -4   0  15   -1.25    0.52 
   4   0 -15   -0.04    0.39 
  -4   0  14    8.93    1.29 
   4   0 -14    8.07    0.75 
   4   0 -13    0.30    0.38 
  -4   0  13    0.49    0.56 
  -4   0  12    5.83    0.72 
  -4   0  12    4.88    0.87 
   4   0 -12    6.64    0.75 
  -4   0  11    0.16    0.41 
   4   0 -11    0.03    0.32 
  -4   0  11    0.16    0.29 
  -4   0  10   50.06    2.02 
  -4   0  10   49.77    1.59 
  -4   0  10   53.09    2.08 
   4   0 -10   53.18    1.65 
  -4   0   9   -0.37    0.17 
   4   0  -9   -0.15    0.26 
  -4   0   9   -0.30    0.29 
  -4   0   8   14.25    0.97 
   4   0  -8   15.20    0.75 
  -4   0   8   13.89    0.71 
  -4   0   8   15.43    0.99 
  -4   0   7   -0.09    0.29 
  -4   0   7   -0.22    0.22 
   4   0  -7   -0.22    0.24 
  -4   0   7    0.07    0.32 
   4   0  -6   91.15    2.21 
  -4   0   6   93.03    2.20 
  -4   0   6   91.81    2.47 
   4   0  -5   -0.19    0.23 
  -4   0   5    0.21    0.19 
  -4   0   5   -0.33    0.20 
   4   0  -5    0.20    0.21 
   4   0  -3    0.01    0.14 
   4   0  -3    0.05    0.13 
  -4   0   3    0.03    0.14 
  -4   0   3    0.06    0.11 
   4   0  -2  147.40    3.03 
  -4   0   2  147.57    3.01 
   4   0  -2  143.64    2.97 
  -4   0   2  142.69    2.97 
   4   0  -1    0.05    0.11 
  -4   0   1    0.01    0.07 
   4   0  -1    0.14    0.12 
  -4   0   1   -0.03    0.09 
  -4   0   0  106.23    2.28 
   4   0   0  101.19    2.26 
  -4   0   0  103.46    2.11 
   4   0   0  103.72    2.11 
   4   0   1    0.04    0.12 
  -4   0  -1    0.11    0.09 
   4   0   1   -0.05    0.08 
  -4   0  -1    0.03    0.13 
   4   0   2   31.00    0.97 
  -4   0  -3    0.00    0.22 
   4   0   3   -0.16    0.17 
   4   0   4  116.13    2.79 
  -4   0  -4  120.47    2.90 
   4   0   5   -0.02    0.18 
  -4   0  -5    0.03    0.22 
  -4   0  -6   10.97    0.80 
  -4   0  -7    0.21    0.36 
   4   0   7    0.28    0.31 
  -4   0  -8    6.58    0.99 
  -4   0  -9   -0.10    0.39 
  -4   0 -10   18.52    1.38 
  -4   0 -11   -0.01    0.50 
  -4   0 -12   69.25    2.96 
  -4   0 -13    0.56    0.59 
  -4   0 -14   21.79    1.81 
  -4   0 -15    0.65    0.75 
  -4   0 -16    8.00    1.48 
  -4   1  20    1.33    0.70 
  -4   1  19   15.38    1.18 
  -4   1  19   16.58    1.79 
  -4  -1  19   15.32    1.79 
  -4   1  18    2.28    0.93 
  -4   1  18    2.96    0.72 
  -4   1  17    3.72    1.05 
   4   1 -17    4.34    0.77 
  -4   1  17    2.54    0.74 
  -4  -1  17    4.01    1.10 
  -4   1  16    1.83    0.75 
   4   1 -16    0.83    0.51 
  -4  -1  16    0.39    0.66 
   4   1 -15    0.35    0.40 
  -4   1  15    0.42    0.61 
   4  -1 -15   -0.46    0.33 
  -4  -1  15    0.21    0.61 
  -4   1  14    4.80    1.02 
   4   1 -14    6.40    0.79 
   4  -1 -14    7.54    0.90 
  -4   1  13   31.25    1.82 
   4   1 -13   32.89    1.35 
   4  -1 -13   32.63    1.36 
  -4  -1  13   32.83    1.89 
  -4   1  12    9.84    0.84 
  -4   1  12    8.30    1.02 
   4   1 -12    9.47    0.73 
   4  -1 -12    9.57    0.75 
  -4  -1  12   10.81    0.74 
  -4  -1  12    9.83    1.10 
  -4   1  11    8.64    0.70 
  -4   1  11   10.54    1.02 
   4   1 -11    9.75    0.71 
  -4  -1  11    9.07    0.67 
  -4  -1  11    9.98    1.04 
   4  -1 -11    9.34    0.71 
  -4   1  10   41.30    1.78 
   4   1 -10   40.94    1.59 
  -4   1  10   41.64    1.80 
  -4  -1  10   42.05    1.38 
  -4  -1  10   41.08    1.82 
   4  -1 -10   41.83    1.43 
  -4  -1  10   39.98    1.82 
  -4   1   9    5.99    0.72 
  -4   1   9    5.79    0.52 
  -4   1   9    6.63    0.74 
   4   1  -9    5.56    0.52 
  -4  -1   9    7.22    0.91 
  -4  -1   9    5.70    0.71 
  -4  -1   9    6.42    0.51 
   4  -1  -9    5.48    0.55 
  -4   1   8    3.76    0.59 
  -4   1   8    3.98    0.64 
   4   1  -8    3.13    0.44 
  -4   1   8    4.26    0.56 
  -4  -1   8    3.73    0.67 
  -4  -1   8    2.67    0.57 
   4  -1  -8    3.57    0.51 
  -4  -1   8    3.31    0.38 
  -4   1   7   66.85    1.81 
  -4   1   7   67.87    2.12 
  -4   1   7   69.32    2.08 
   4   1  -7   69.58    1.82 
  -4  -1   7   73.11    2.20 
   4  -1  -7   64.44    1.80 
  -4  -1   7   68.64    2.19 
  -4  -1   7   69.59    1.81 
   4   1  -6   42.76    1.28 
  -4   1   6   45.12    1.48 
  -4   1   6   41.90    1.27 
   4  -1  -6   41.70    1.51 
  -4  -1   6   41.05    1.49 
  -4  -1   6   41.57    1.25 
   4  -1  -6   42.62    1.29 
  -4   1   5   10.23    0.62 
   4   1  -5   11.01    0.73 
  -4   1   5   10.21    0.55 
   4   1  -5   11.81    0.58 
   4  -1  -5   10.61    0.57 
  -4  -1   5   11.31    0.55 
  -4  -1   5   10.21    0.67 
   4  -1  -5   11.74    0.70 
  -4   1   4  208.41    4.26 
   4   1  -4  199.08    4.40 
  -4   1   4  196.11    4.15 
   4   1  -4  207.96    4.19 
   4  -1  -4  200.24    4.17 
   4  -1  -4  213.44    4.39 
  -4  -1   4  206.65    4.35 
  -4  -1   4  205.82    4.17 
  -4   1   3  381.12    7.29 
   4   1  -3  370.46    7.28 
   4  -1  -3  375.71    7.27 
   4  -1  -3  382.03    7.35 
  -4  -1   3  375.22    7.35 
   4   1  -2    3.05    0.26 
   4   1  -2    3.28    0.28 
  -4   1   2    3.26    0.26 
  -4   1   2    2.99    0.25 
   4  -1  -2    2.78    0.25 
  -4  -1   2    2.83    0.25 
   4  -1  -2    3.12    0.27 
  -4  -1   2    2.96    0.26 
   4   1  -1   77.71    1.74 
   4   1  -1   76.41    1.70 
  -4   1   1   76.97    1.76 
  -4  -1   1   75.48    1.73 
   4  -1  -1   76.40    1.67 
   4  -1  -1   75.31    1.74 
  -4  -1   1   77.82    1.69 
  -4   1   0    5.67    0.27 
   4   1   0    5.68    0.30 
   4   1   0    5.65    0.33 
  -4   1   0    6.67    0.36 
   4  -1   0    5.90    0.27 
  -4  -1   0    6.06    0.34 
   4  -1   0    5.79    0.35 
  -4   1  -1   20.00    0.51 
   4   1   1   19.41    0.57 
  -4   1  -1   20.51    0.71 
  -4  -1  -1   19.51    0.68 
  -4  -1  -1   20.10    0.57 
   4  -1   1   19.39    0.70 
  -4   1  -2    4.20    0.37 
   4   1   2    4.14    0.25 
   4   1   2    4.00    0.33 
  -4  -1  -2    3.98    0.24 
  -4  -1  -2    4.33    0.35 
   4  -1   2    4.19    0.35 
   4   1   3   91.28    1.92 
   4   1   3   93.26    2.23 
  -4   1  -3   95.30    2.34 
  -4  -1  -3   91.90    1.93 
  -4  -1  -3   96.60    2.29 
   4  -1   3   92.36    2.26 
   4   1   4   45.94    1.06 
   4   1   4   45.21    1.37 
  -4   1  -4   46.14    1.51 
   4  -1   4   46.34    1.42 
  -4  -1  -4   43.01    1.42 
  -4  -1  -4   45.40    1.05 
   4   1   5   65.22    1.85 
  -4   1  -5   65.98    2.05 
   4   1   5   66.48    1.46 
   4   1   5   67.77    1.47 
   4  -1   5   67.94    1.93 
  -4  -1  -5   65.84    1.98 
   4   1   6    6.66    0.35 
   4   1   6    7.13    0.57 
  -4   1  -6    6.11    0.64 
   4  -1   6    5.79    0.96 
  -4   1  -7    8.52    0.82 
   4   1   7    8.38    0.67 
   4  -1   7    7.66    0.65 
  -4  -1  -7    8.04    0.77 
  -4   1  -8    8.23    0.88 
  -4  -1  -8   10.32    0.93 
  -4   1  -9    9.52    0.99 
  -4  -1  -9   10.39    1.00 
  -4   1 -10   13.21    1.24 
  -4  -1 -10   13.82    1.20 
  -4   1 -11   80.28    3.12 
  -4  -1 -11   79.66    3.05 
  -4   1 -12   89.68    3.50 
  -4  -1 -12   96.40    3.53 
  -4   1 -13    0.79    0.66 
  -4  -1 -13    1.73    0.73 
  -4   1 -14    3.57    1.01 
  -4  -1 -14    2.42    0.91 
  -4   1 -15    7.16    1.49 
  -4  -1 -15    6.14    1.29 
  -4   1 -16   -0.05    0.79 
  -4  -1 -16    0.45    0.73 
  -4   2  20    5.21    0.80 
  -4   2  19    8.13    1.05 
  -4   2  19    8.28    1.44 
  -4  -2  19    7.14    1.56 
  -4   2  18    3.47    0.75 
  -4   2  18    2.15    0.95 
  -4  -2  18    3.45    1.04 
   4   2 -17    0.84    0.52 
  -4   2  17    0.81    0.70 
  -4   2  17    1.59    0.62 
  -4  -2  17    1.03    0.81 
  -4   2  16    7.46    0.88 
   4   2 -16    7.68    0.80 
  -4   2  16    8.78    1.39 
  -4  -2  16    7.88    1.30 
  -4   2  15    4.39    1.00 
   4   2 -15    4.39    0.71 
  -4  -2  15    4.20    1.01 
   4   2 -14    9.41    0.80 
  -4   2  14   10.08    1.15 
  -4  -2  14   10.23    1.22 
   4   2 -13   -0.21    0.34 
  -4   2  13    0.15    0.48 
  -4  -2  13    0.29    0.48 
   4  -2 -13    0.59    0.43 
  -4   2  12   38.39    1.88 
   4   2 -12   40.49    1.46 
   4  -2 -12   40.72    1.51 
  -4  -2  12   37.09    1.39 
  -4  -2  12   39.72    2.02 
   4   2 -11   63.14    1.89 
  -4   2  11   60.51    1.91 
  -4   2  11   62.47    2.34 
  -4  -2  11   63.13    2.49 
   4  -2 -11   62.40    1.93 
  -4  -2  11   62.64    1.85 
  -4   2  10    8.32    0.65 
  -4   2  10    8.02    0.83 
   4   2 -10    7.16    0.63 
  -4   2  10    7.54    0.81 
  -4  -2  10    7.51    0.59 
  -4  -2  10    9.54    0.94 
   4  -2 -10    8.55    0.67 
  -4   2   9   30.78    1.44 
   4   2  -9   32.15    1.18 
  -4   2   9   32.64    1.20 
   4  -2  -9   33.95    1.27 
  -4  -2   9   33.49    1.58 
  -4  -2   9   32.66    1.15 
  -4  -2   9   30.79    1.51 
  -4   2   8   19.94    1.05 
   4   2  -8   19.53    0.86 
  -4   2   8   20.15    1.09 
  -4   2   8   18.16    0.87 
   4  -2  -8   19.70    0.90 
  -4  -2   8   18.70    1.32 
  -4  -2   8   19.18    0.83 
  -4  -2   8   19.04    1.13 
  -4   2   7    0.31    0.28 
  -4   2   7   -0.04    0.23 
   4   2  -7    0.03    0.25 
  -4   2   7    0.49    0.34 
  -4  -2   7    0.01    0.30 
  -4  -2   7    0.08    0.23 
  -4  -2   7   -0.07    0.32 
   4  -2  -7   -0.20    0.23 
   4   2  -6    6.92    0.53 
  -4   2   6    6.83    0.54 
  -4   2   6    6.64    0.59 
  -4  -2   6    7.63    0.70 
   4  -2  -6    5.83    0.61 
   4  -2  -6    6.80    0.55 
  -4  -2   6    6.64    0.50 
  -4  -2   6    6.10    0.66 
  -4   2   5  206.12    4.32 
   4   2  -5  212.01    4.70 
  -4   2   5  209.42    4.40 
   4   2  -5  208.43    4.32 
  -4  -2   5  202.93    4.56 
  -4  -2   5  206.59    4.30 
   4  -2  -5  207.55    4.34 
   4  -2  -5  206.24    4.50 
  -4   2   4   13.72    0.58 
   4   2  -4   12.09    0.71 
  -4   2   4   13.14    0.60 
   4   2  -4   13.67    0.60 
  -4  -2   4   14.13    0.70 
   4  -2  -4   14.03    0.62 
  -4  -2   4   13.00    0.58 
  -4   2   3  171.76    3.45 
   4   2  -3  168.77    3.50 
   4   2  -3  164.33    3.84 
  -4   2   3  169.35    3.48 
  -4  -2   3  171.21    3.49 
   4  -2  -3  169.03    3.49 
   4  -2  -3  154.43    3.46 
  -4  -2   3  172.72    3.57 
  -4   2   2    2.17    0.25 
  -4   2   2    2.13    0.22 
   4   2  -2    2.11    0.25 
   4   2  -2    2.19    0.27 
   4  -2  -2    2.33    0.26 
  -4  -2   2    2.08    0.24 
   4  -2  -2    1.85    0.21 
  -4  -2   2    2.56    0.30 
   4   2  -1    0.73    0.18 
   4   2  -1    0.39    0.14 
  -4   2   1    0.47    0.16 
  -4  -2   1    0.60    0.17 
  -4  -2   1    0.44    0.15 
   4  -2  -1    0.43    0.16 
   4  -2  -1    0.90    0.20 
  -4   2   0   33.89    0.97 
   4   2   0   32.82    0.92 
  -4   2   0   34.56    0.85 
   4   2   0   33.71    0.92 
   4  -2   0   34.74    0.86 
  -4  -2   0   29.76    0.88 
  -4  -2   0   36.49    0.96 
  -4   2  -1   26.39    0.66 
   4   2   1   27.78    0.92 
  -4   2  -1   26.08    0.67 
   4   2   1   26.13    0.76 
  -4   2  -1   27.11    0.87 
   4  -2   1   25.34    0.84 
  -4  -2  -1   26.44    0.81 
   4   2   2  106.04    2.41 
   4   2   2  107.46    2.29 
  -4  -2  -2  107.87    2.29 
  -4  -2  -2  109.98    2.44 
   4  -2   2  108.83    2.50 
   4   2   3  125.16    2.60 
  -4   2  -3  122.32    2.93 
   4   2   3  122.13    2.76 
  -4  -2  -3  123.84    2.59 
  -4  -2  -3  126.58    2.83 
   4   2   4    0.83    0.22 
  -4   2  -4    1.24    0.41 
   4   2   4    1.32    0.32 
   4  -2   4    0.51    0.26 
  -4  -2  -4    1.30    0.35 
  -4  -2  -4    1.57    0.27 
   4   2   5   36.64    1.21 
  -4   2  -5   34.35    1.61 
   4   2   5   34.83    0.96 
  -4  -2  -5   36.29    1.32 
   4  -2   5   34.10    1.28 
  -4  -2  -5   34.57    0.97 
   4   2   6   53.10    1.65 
  -4   2  -6   51.94    1.91 
   4   2   6   55.32    1.36 
   4  -2   6   54.64    1.76 
  -4  -2  -6   53.87    1.86 
   4   2   7  190.81    3.92 
   4   2   7  191.33    3.91 
  -4   2  -7  189.40    4.82 
   4   2   7  190.95    4.39 
  -4  -2  -7  194.86    4.69 
   4  -2   7  190.32    4.51 
   4   2   8    5.03    0.58 
  -4   2  -8    5.77    0.95 
   4   2   8    5.24    0.43 
   4   2   8    5.56    0.42 
  -4  -2  -8    7.14    1.03 
  -4   2  -9    9.13    0.99 
   4   2   9    9.55    0.54 
   4   2   9    9.79    0.54 
  -4  -2  -9    9.11    0.95 
   4   2  10    4.03    0.44 
  -4   2 -10    4.69    0.90 
   4   2  10    4.75    0.44 
  -4  -2 -10    4.48    0.92 
   4   2  11    6.40    0.52 
   4   2  11    7.45    0.51 
  -4  -2 -11    8.72    1.08 
  -4   2 -12    0.63    0.58 
   4   2  12    0.31    0.28 
  -4  -2 -12   -0.18    0.54 
  -4   2 -13   11.77    1.39 
  -4  -2 -13   12.66    1.38 
  -4   2 -14    0.40    0.68 
  -4  -2 -14    1.81    0.80 
  -4  -2 -15    0.96    0.86 
  -4   2 -16    1.83    1.04 
  -4  -2 -16    2.71    1.01 
  -4   3  20   -0.68    0.73 
  -4   3  19    5.64    0.91 
  -4   3  19    3.62    1.08 
   4   3 -19    5.52    0.91 
  -4   3  18    2.26    0.87 
  -4   3  18    3.77    0.78 
  -4  -3  18    2.24    1.02 
  -4   3  17    1.04    0.80 
   4   3 -17    1.93    0.61 
  -4   3  17    2.01    0.68 
  -4  -3  17    1.07    0.77 
  -4   3  16    4.96    1.06 
   4   3 -16    5.45    0.76 
  -4  -3  16    4.80    1.14 
  -4   3  15    0.62    0.63 
   4   3 -15    0.53    0.42 
  -4   3  15   -0.38    0.40 
  -4  -3  15   -0.29    0.45 
  -4   3  14   91.71    3.26 
  -4   3  14   89.07    2.74 
   4   3 -14   91.98    2.58 
  -4  -3  14   89.70    3.48 
  -4   3  13    7.51    1.06 
   4   3 -13    5.79    0.72 
  -4  -3  13    5.37    0.97 
  -4   3  12    0.23    0.46 
   4   3 -12    0.51    0.36 
  -4  -3  12    0.01    0.43 
  -4  -3  12    0.12    0.30 
   4   3 -11   13.55    0.84 
  -4   3  11   15.21    1.07 
  -4   3  11   14.37    1.10 
  -4  -3  11   11.73    0.76 
   4  -3 -11   12.57    0.84 
  -4  -3  11   14.86    1.21 
  -4   3  10    0.37    0.40 
  -4   3  10    0.49    0.44 
  -4   3  10    0.31    0.35 
   4   3 -10    0.79    0.37 
  -4  -3  10    0.48    0.43 
   4  -3 -10    1.54    0.44 
   4   3  -9    6.62    0.78 
  -4   3   9    5.79    0.75 
  -4   3   9    4.42    0.64 
  -4   3   9    4.54    0.53 
  -4  -3   9    5.58    0.84 
  -4  -3   9    5.47    0.86 
  -4  -3   9    4.35    0.46 
   4  -3  -9    6.02    0.70 
  -4   3   8   28.36    1.12 
  -4   3   8   28.48    1.23 
   4   3  -8   29.84    1.10 
  -4   3   8   28.77    1.29 
  -4  -3   8   29.45    1.42 
  -4  -3   8   27.85    1.04 
  -4   3   7   16.75    0.82 
  -4   3   7   17.28    0.88 
   4   3  -7   17.28    0.79 
  -4   3   7   16.95    0.92 
  -4  -3   7   16.84    1.03 
   4  -3  -7   17.27    0.83 
  -4  -3   7   16.11    1.00 
  -4  -3   7   16.45    0.75 
  -4   3   6   36.43    1.20 
  -4   3   6   34.75    1.20 
   4   3  -6   37.34    1.19 
   4  -3  -6   34.79    1.20 
  -4  -3   6   34.14    1.42 
  -4  -3   6   35.19    1.41 
  -4  -3   6   34.64    1.13 
  -4   3   5   87.08    2.05 
   4   3  -5   82.42    2.06 
  -4   3   5   82.99    2.08 
   4  -3  -5   84.15    2.10 
  -4  -3   5   82.18    2.03 
  -4  -3   5   82.30    2.28 
   4   3  -4    0.03    0.24 
   4   3  -4    0.62    0.34 
  -4   3   4   -0.05    0.23 
  -4   3   4    0.38    0.19 
  -4  -3   4   -0.05    0.24 
   4  -3  -4    0.10    0.24 
   4  -3  -4   -0.34    0.21 
  -4  -3   4   -0.07    0.20 
   4   3  -3    1.89    0.31 
  -4   3   3    2.73    0.35 
  -4   3   3    2.18    0.24 
   4   3  -3    2.47    0.40 
   4  -3  -3    2.22    0.28 
   4  -3  -3    2.34    0.36 
  -4  -3   3    2.34    0.32 
  -4  -3   3    2.77    0.33 
  -4   3   2    7.83    0.44 
   4   3  -2    8.65    0.47 
  -4   3   2    8.80    0.41 
   4   3  -2    7.91    0.48 
  -4  -3   2    8.12    0.43 
  -4  -3   2    7.42    0.43 
   4  -3  -2    7.97    0.45 
   4   3  -1   68.10    1.65 
  -4   3   1   67.05    1.60 
  -4   3   1   67.52    1.60 
   4   3  -1   69.51    1.62 
  -4  -3   1   68.66    1.58 
  -4  -3   1   67.31    1.63 
   4   3   0   47.01    1.19 
   4   3   0   47.20    1.24 
  -4   3   0   46.04    1.24 
  -4   3   0   46.80    1.17 
  -4   3   0   47.39    1.16 
  -4  -3   0   49.60    1.22 
  -4  -3   0   45.24    1.22 
   4  -3   0   50.51    1.27 
   4   3   1   30.58    0.93 
  -4   3  -1   29.38    0.97 
  -4   3  -1   30.80    0.81 
  -4   3  -1   31.72    0.82 
   4   3   1   31.08    0.91 
  -4  -3  -1   32.73    0.91 
  -4  -3  -1   29.57    0.91 
   4  -3   1   31.19    0.97 
   4   3   2   60.97    1.50 
  -4   3  -2   57.66    1.30 
  -4   3  -2   60.06    1.66 
  -4   3  -2   59.82    1.31 
   4   3   2   61.04    1.51 
  -4  -3  -2   60.10    1.51 
   4  -3   2   61.08    1.62 
   4   3   3    1.22    0.27 
   4   3   3    1.10    0.27 
  -4   3  -3    0.72    0.29 
   4  -3   3    0.62    0.25 
  -4  -3  -3    1.04    0.29 
  -4  -3  -3    1.01    0.28 
   4   3   4   41.75    1.16 
  -4   3  -4   39.92    1.47 
   4   3   4   42.67    1.26 
  -4  -3  -4   41.68    1.32 
   4  -3   4   40.69    1.37 
  -4  -3  -4   41.08    1.15 
  -4   3  -5    8.94    0.75 
   4   3   5    9.08    0.56 
   4   3   5    8.81    0.50 
  -4  -3  -5    9.20    0.65 
  -4  -3  -5    9.33    0.50 
   4  -3   5    9.78    0.66 
   4   3   6   24.10    0.85 
  -4   3  -6   22.19    1.22 
   4   3   6   24.12    0.99 
   4  -3   6   24.10    1.10 
  -4  -3  -6   24.20    1.14 
   4   3   7    3.14    0.43 
   4   3   7    2.53    0.37 
  -4   3  -7    4.38    0.86 
  -4  -3  -7    2.87    0.57 
   4   3   8    4.49    0.47 
   4   3   8    5.96    0.59 
   4   3   8    4.58    0.45 
  -4   3  -8    4.94    0.91 
  -4  -3  -8    7.71    1.03 
  -4   3  -9   18.07    1.34 
   4   3   9   17.50    0.78 
   4   3   9   18.65    0.80 
  -4  -3  -9   16.75    1.20 
  -4   3 -10   12.25    1.21 
   4   3  10   12.64    0.69 
   4   3  10   13.05    0.70 
  -4  -3 -10   13.80    1.18 
  -4   3 -11    1.78    0.76 
   4   3  11    1.31    0.34 
   4   3  11    0.90    0.36 
  -4  -3 -11    1.22    0.59 
  -4   3 -12    7.72    1.22 
   4   3  12    7.57    0.57 
   4   3  12    8.15    0.61 
  -4   3 -13   10.46    1.47 
   4   3  13    6.39    0.58 
  -4  -3 -13    7.82    1.32 
  -4   3 -14    2.83    0.97 
  -4  -3 -14    2.27    0.91 
  -4   3 -15    0.84    0.71 
  -4  -3 -15    0.49    0.78 
  -4   3 -16    3.04    1.22 
  -4  -3 -16    3.59    1.18 
  -4   4  20    2.00    0.84 
   4   4 -19    5.14    0.98 
  -4   4  19    1.95    0.97 
  -4   4  19    3.63    0.86 
  -4   4  18    3.83    1.06 
  -4   4  18    2.85    0.71 
  -4  -4  18    2.30    0.97 
   4   4 -17    4.82    0.78 
  -4   4  17    3.31    0.77 
  -4   4  17    4.78    1.00 
  -4  -4  17    3.07    1.02 
  -4   4  16    2.71    0.72 
   4   4 -16    2.00    0.57 
  -4   4  16    1.23    0.69 
  -4  -4  16    0.48    0.74 
   4   4 -15    3.71    0.65 
  -4   4  15    2.60    0.64 
  -4  -4  15    2.51    0.95 
  -4   4  14    0.50    0.55 
  -4   4  14   -0.08    0.44 
   4   4 -14    0.75    0.46 
  -4  -4  14   -0.45    0.56 
  -4   4  13    2.98    0.64 
   4   4 -13    3.85    0.65 
  -4   4  13    3.53    0.74 
  -4  -4  13    2.88    0.89 
  -4   4  12    7.89    0.93 
  -4   4  12    9.02    0.83 
   4   4 -12    8.74    0.75 
  -4  -4  12   10.21    0.87 
  -4  -4  12    9.02    1.11 
  -4   4  11    2.17    0.52 
   4   4 -11    1.30    0.43 
  -4   4  11    1.48    0.54 
  -4   4  11    2.00    0.61 
  -4  -4  11    1.63    0.62 
  -4  -4  11    0.55    0.38 
  -4   4  10    0.27    0.36 
  -4   4  10   -0.04    0.27 
   4   4 -10    0.18    0.30 
  -4  -4  10   -0.07    0.26 
  -4  -4  10   -0.46    0.38 
  -4   4   9   10.82    0.76 
  -4   4   9   11.28    0.86 
   4   4  -9   11.18    0.72 
  -4   4   9   10.56    0.80 
  -4  -4   9   10.10    0.94 
  -4  -4   9   10.87    0.68 
  -4  -4   9   11.02    0.98 
  -4   4   8    0.17    0.29 
  -4   4   8    0.08    0.25 
  -4   4   8   -0.20    0.24 
   4   4  -8    0.18    0.26 
  -4  -4   8   -0.11    0.21 
  -4  -4   8    0.18    0.37 
  -4  -4   8    0.16    0.35 
   4   4  -7   31.07    1.11 
  -4   4   7   28.05    1.11 
  -4   4   7   28.35    1.09 
  -4   4   7   26.97    1.16 
  -4  -4   7   27.86    1.34 
  -4  -4   7   26.23    1.01 
  -4  -4   7   28.85    1.36 
  -4   4   6   19.11    0.80 
  -4   4   6   17.62    0.84 
   4   4  -6   19.17    0.84 
  -4  -4   6   19.16    0.81 
  -4  -4   6   17.20    1.02 
  -4  -4   6   18.48    1.01 
  -4   4   5    1.16    0.35 
  -4   4   5    1.23    0.26 
   4   4  -5    1.56    0.38 
  -4  -4   5    0.92    0.37 
   4  -4  -5    1.59    0.36 
  -4  -4   5    1.49    0.40 
  -4  -4   5    1.18    0.31 
   4   4  -4    0.08    0.30 
   4   4  -4    0.79    0.31 
  -4   4   4    0.46    0.19 
  -4   4   4    0.19    0.28 
  -4   4   4    0.33    0.28 
   4  -4  -4    0.33    0.26 
  -4  -4   4    0.32    0.29 
  -4  -4   4    0.20    0.23 
  -4   4   3    3.31    0.30 
  -4   4   3    3.24    0.42 
   4   4  -3    3.86    0.49 
   4   4  -3    4.03    0.47 
  -4   4   3    3.33    0.43 
  -4  -4   3    3.06    0.41 
   4  -4  -3    2.76    0.31 
  -4  -4   3    3.12    0.39 
  -4   4   2    2.12    0.34 
   4   4  -2    2.47    0.38 
  -4   4   2    3.06    0.33 
  -4   4   2    2.32    0.38 
  -4  -4   2    2.09    0.29 
  -4  -4   2    2.10    0.33 
   4  -4  -2    2.29    0.27 
  -4   4   1   69.94    1.76 
  -4   4   1   72.42    1.75 
   4   4  -1   71.48    1.74 
   4   4  -1   72.56    1.81 
  -4   4   1   76.02    1.72 
  -4  -4   1   73.44    1.68 
  -4  -4   1   70.29    1.78 
   4  -4  -1   75.27    1.72 
   4   4   0    0.04    0.24 
  -4   4   0   -0.02    0.21 
  -4   4   0   -0.07    0.22 
  -4   4   0    0.18    0.20 
   4   4   0   -0.02    0.17 
  -4  -4   0    0.01    0.21 
   4  -4   0   -0.15    0.05 
  -4  -4   0    0.10    0.16 
   4   4   1  426.24    8.17 
  -4   4  -1  426.82    8.00 
   4   4   1  412.04    7.99 
  -4   4  -1  421.58    8.20 
  -4   4  -1  402.27    7.97 
  -4  -4  -1  411.20    8.13 
   4  -4   1  419.26    8.15 
  -4  -4  -1  425.24    8.01 
   4   4   2   99.09    2.30 
  -4   4  -2   96.36    2.07 
  -4   4  -2   95.20    2.39 
   4   4   2   93.34    2.26 
  -4  -4  -2   95.11    2.26 
  -4  -4  -2   98.87    2.20 
   4  -4   2  100.98    2.36 
  -4   4  -3   21.68    0.98 
   4   4   3   19.93    0.75 
   4   4   3   21.04    0.81 
  -4   4  -3   21.78    0.62 
   4  -4   3   21.71    0.89 
  -4  -4  -3   20.40    0.79 
  -4   4  -4    4.49    0.55 
   4   4   4    4.96    0.42 
   4   4   4    4.98    0.40 
  -4  -4  -4    4.80    0.41 
  -4  -4  -4    4.73    0.44 
   4  -4   4    5.11    0.48 
   4   4   5   48.28    1.39 
   4   4   5   48.60    1.42 
  -4   4  -5   49.31    1.79 
  -4  -4  -5   48.25    1.56 
  -4  -4  -5   45.66    1.36 
   4   4   6   11.76    0.67 
   4   4   6   10.73    0.62 
  -4   4  -6   10.05    0.88 
  -4  -4  -6   11.71    0.63 
   4  -4   6   12.12    0.81 
  -4  -4  -6   11.80    0.80 
   4   4   7   14.68    0.81 
   4   4   7   16.22    0.77 
   4   4   7   15.35    0.76 
  -4   4  -7   15.86    1.15 
  -4  -4  -7   15.18    0.98 
   4   4   8   31.53    1.13 
  -4   4  -8   31.86    1.69 
   4   4   8   29.91    1.24 
   4   4   8   30.17    1.12 
  -4  -4  -8   30.84    1.50 
  -4   4  -9    4.33    0.92 
   4   4   9    4.35    0.53 
   4   4   9    4.40    0.56 
  -4  -4  -9    5.47    0.87 
   4   4  10    0.13    0.34 
  -4   4 -10    0.70    0.55 
   4   4  10    0.42    0.51 
  -4  -4 -10    0.51    0.54 
   4   4  11    5.47    0.59 
  -4   4 -11    8.94    1.44 
  -4  -4 -11    7.53    1.11 
  -4   4 -12    1.32    0.75 
   4   4  12    2.74    0.51 
   4   4  12    2.01    0.43 
  -4  -4 -12    2.09    0.71 
   4   4  13   17.68    1.11 
   4   4  13   15.92    0.89 
  -4   4 -13   14.76    1.55 
  -4  -4 -13   15.42    1.47 
   4   4  14   34.85    1.27 
  -4   4 -14   32.35    2.29 
  -4  -4 -14   32.80    2.15 
  -4   4 -15    1.18    0.85 
  -4  -4 -15    1.46    0.90 
  -4  -4 -16    1.47    1.19 
  -4  -4 -17    2.07    1.25 
  -4   5  20    8.02    1.14 
   4   5 -19    4.49    1.36 
  -4   5  19    3.71    0.87 
  -4   5  19    6.12    1.32 
   4   5 -18    2.08    0.73 
  -4   5  18    1.80    0.94 
  -4   5  18    3.08    0.80 
  -4  -5  18    2.34    0.89 
  -4   5  17    0.83    0.77 
  -4   5  17    1.43    0.61 
   4   5 -17    1.25    0.57 
  -4  -5  17    1.87    1.52 
   4   5 -16    0.67    0.49 
  -4   5  16   -0.19    0.56 
  -4   5  16    0.47    0.53 
  -4  -5  16    0.55    0.73 
   4   5 -15    0.11    0.43 
  -4   5  15   -0.20    0.51 
  -4   5  15    0.82    0.51 
  -4  -5  15    0.77    0.72 
  -4   5  14    3.18    0.86 
   4   5 -14    3.95    0.71 
  -4   5  14    1.80    0.55 
  -4  -5  14    1.70    0.75 
  -4   5  13   14.96    1.06 
   4   5 -13   13.72    0.93 
  -4   5  13   13.11    1.15 
  -4  -5  13   15.40    1.45 
   4   5 -12   12.13    0.84 
  -4   5  12   11.43    1.00 
  -4   5  12   10.34    0.90 
  -4  -5  12   10.08    1.13 
  -4   5  11   -0.13    0.36 
  -4   5  11    0.08    0.40 
  -4   5  11    0.09    0.40 
   4   5 -11   -0.19    0.32 
  -4  -5  11   -0.39    0.28 
  -4  -5  11   -0.88    0.34 
   4   5 -10   46.23    1.60 
  -4   5  10   47.45    1.82 
  -4   5  10   49.04    1.75 
  -4   5  10   47.56    2.04 
  -4  -5  10   46.53    1.54 
  -4  -5  10   47.95    2.10 
   4   5  -9    4.54    0.66 
  -4   5   9    3.74    0.59 
  -4   5   9    3.19    0.58 
  -4   5   9    3.82    0.64 
  -4  -5   9    3.81    0.78 
  -4  -5   9    5.27    0.61 
  -4   5   8   91.00    2.41 
  -4   5   8   89.39    2.53 
   4   5  -8   93.86    2.44 
  -4   5   8   91.58    2.52 
  -4   5   8   88.43    2.47 
  -4  -5   8   93.77    2.87 
  -4  -5   8   90.40    2.84 
  -4  -5   8   94.99    2.63 
  -4   5   7    7.08    0.61 
  -4   5   7    6.47    0.51 
  -4   5   7    6.56    0.59 
  -4   5   7    6.78    0.61 
  -4  -5   7    6.28    0.72 
  -4  -5   7    6.15    0.91 
  -4  -5   7    5.75    0.50 
  -4   5   6  125.94    2.81 
  -4   5   6  126.06    3.12 
   4   5  -6  130.36    3.03 
  -4   5   6  129.88    3.08 
  -4  -5   6  126.65    3.34 
  -4  -5   6  121.63    2.93 
  -4  -5   6  125.02    3.26 
  -4   5   5   32.04    1.20 
  -4   5   5   31.25    0.94 
  -4   5   5   32.46    1.17 
   4   5  -5   34.18    1.17 
  -4  -5   5   34.20    1.30 
  -4  -5   5   31.12    1.31 
  -4  -5   5   31.65    1.10 
   4   5  -4  108.19    2.54 
  -4   5   4  103.34    2.55 
  -4   5   4  106.62    2.26 
  -4   5   4  100.24    2.51 
  -4  -5   4  100.54    2.47 
  -4  -5   4  102.95    2.57 
   4  -5  -4  101.66    2.36 
  -4   5   3   14.03    0.72 
   4   5  -3   14.24    0.73 
   4   5  -3   13.87    0.78 
  -4   5   3   14.52    0.74 
  -4   5   3   14.45    0.56 
  -4  -5   3   14.65    0.69 
  -4  -5   3   13.29    0.68 
   4  -5  -3   14.38    0.58 
  -4   5   2   75.67    1.93 
   4   5  -2   76.99    1.95 
  -4   5   2   76.10    1.72 
   4   5  -2   74.86    2.14 
  -4   5   2   72.46    1.89 
  -4  -5   2   77.74    1.79 
   4  -5  -2   72.45    1.70 
  -4  -5   2   72.96    1.90 
  -4   5   1   18.97    0.79 
   4   5  -1   17.89    0.74 
  -4   5   1   19.24    0.77 
   4   5  -1   18.56    0.81 
  -4   5   1   19.32    0.68 
  -4  -5   1   18.24    0.77 
  -4  -5   1   18.66    0.65 
  -4   5   0    1.62    0.31 
  -4   5   0    1.92    0.30 
   4   5   0    1.39    0.34 
   4   5   0    1.84    0.28 
  -4  -5   0    1.99    0.35 
   4  -5   0    1.52    0.27 
  -4  -5   0    2.00    0.27 
   4   5   1   14.66    0.71 
  -4   5  -1   14.40    0.62 
  -4   5  -1   15.20    0.71 
   4   5   1   14.92    0.56 
  -4  -5  -1   13.57    0.68 
  -4  -5  -1   14.81    0.55 
   4   5   2    0.16    0.24 
  -4   5  -2    0.39    0.26 
  -4   5  -2    0.40    0.19 
   4   5   2    0.39    0.20 
   4  -5   2    0.31    0.21 
  -4  -5  -2    0.23    0.26 
   4  -5   2    0.30    0.22 
  -4  -5  -2    0.17    0.15 
  -4   5  -3   19.30    0.65 
   4   5   3   18.35    0.69 
  -4   5  -3   19.80    0.96 
   4   5   3   18.32    0.81 
  -4  -5  -3   17.95    0.80 
  -4  -5  -3   19.42    0.74 
   4  -5   3   19.47    0.84 
  -4   5  -4   33.21    0.89 
   4   5   4   32.22    1.02 
  -4   5  -4   33.47    1.59 
   4   5   4   31.40    1.11 
  -4  -5  -4   30.40    1.09 
   4  -5   4   32.58    0.91 
  -4  -5  -4   32.72    1.11 
   4  -5   4   33.76    1.23 
  -4   5  -5   29.99    1.39 
   4   5   5   29.78    1.02 
   4   5   5   28.16    1.07 
   4  -5   5   29.19    0.82 
  -4  -5  -5   29.86    1.15 
   4  -5   5   28.86    1.20 
   4   5   6    1.53    0.38 
  -4   5  -6    0.60    0.36 
   4   5   6    1.24    0.30 
  -4  -5  -6    1.95    0.45 
  -4  -5  -6    2.11    0.40 
   4  -5   6    1.38    0.43 
  -4   5  -7   49.14    2.07 
   4   5   7   49.70    1.58 
  -4   5  -8    8.45    1.06 
   4   5   8    7.37    0.62 
   4   5   8    8.53    0.65 
   4   5   8    7.05    0.72 
  -4  -5  -8    6.58    0.77 
   4   5   9   30.66    1.23 
   4   5   9   32.09    1.23 
  -4   5  -9   35.22    1.91 
  -4  -5  -9   31.63    1.60 
   4   5  10   18.65    0.95 
   4   5  10   17.90    0.97 
  -4  -5 -10   17.01    1.27 
   4   5  11   16.30    0.91 
   4   5  11   16.60    0.93 
  -4   5 -11   15.01    1.45 
  -4  -5 -11   14.22    1.28 
  -4   5 -12   13.39    1.84 
   4   5  12    8.08    0.71 
  -4  -5 -12   10.08    1.20 
   4   5  13    8.37    0.73 
  -4   5 -13    7.52    1.42 
  -4  -5 -13   10.38    1.50 
   4   5  14    2.53    0.52 
  -4   5 -14    1.67    0.84 
  -4  -5 -14    2.88    0.84 
   4   5  15    3.27    0.64 
  -4   5 -15    4.27    1.32 
  -4  -5 -15    1.67    0.86 
  -4   6  20    4.68    0.99 
  -4   6  19   15.55    1.56 
  -4   6  19   14.64    1.80 
   4   6 -18    0.72    0.70 
  -4   6  18    1.49    0.76 
  -4   6  18   -0.27    0.57 
  -4   6  17    3.78    0.94 
  -4   6  17    2.86    0.72 
  -4  -6  17    3.61    1.02 
  -4   6  16    4.16    0.80 
   4   6 -16    4.10    0.76 
  -4   6  16    5.45    1.09 
  -4  -6  16    5.14    1.18 
  -4   6  15    7.62    1.01 
  -4   6  15    8.81    1.04 
   4   6 -15    6.70    0.79 
  -4  -6  15    9.26    1.48 
  -4   6  14    0.70    0.52 
  -4   6  14    1.00    0.59 
   4   6 -14    1.64    0.57 
  -4  -6  14    0.75    0.74 
  -4   6  13    7.92    0.90 
   4   6 -13    7.43    0.77 
  -4   6  13    7.42    0.98 
  -4  -6  13    8.50    1.25 
  -4   6  12    0.15    0.47 
  -4   6  12    0.44    0.45 
   4   6 -12   -0.02    0.37 
  -4  -6  12    0.86    0.65 
  -4   6  11    0.89    0.40 
  -4   6  11    0.66    0.46 
  -4   6  11    0.30    0.39 
   4   6 -11    0.27    0.34 
  -4  -6  11   -0.01    0.51 
  -4   6  10   39.59    1.60 
  -4   6  10   42.49    1.68 
  -4   6  10   40.25    1.75 
   4   6 -10   41.72    1.53 
  -4  -6  10   41.78    1.99 
  -4  -6  10   45.77    1.79 
  -4   6   9    0.27    0.32 
  -4   6   9    0.37    0.35 
   4   6  -9    0.05    0.29 
  -4   6   9   -0.19    0.29 
  -4  -6   9    0.19    0.41 
  -4  -6   9    0.50    0.33 
   4   6  -8    1.25    0.42 
  -4   6   8    0.76    0.36 
  -4   6   8    0.84    0.38 
  -4   6   8    0.83    0.30 
  -4  -6   8    0.15    0.41 
  -4  -6   8    1.24    0.36 
  -4  -6   8    0.61    0.42 
  -4   6   7    1.53    0.38 
  -4   6   7    1.14    0.26 
  -4   6   7    0.75    0.33 
   4   6  -7    1.62    0.43 
  -4   6   7    1.08    0.38 
  -4  -6   7    1.06    0.41 
  -4  -6   7    2.15    0.43 
  -4   6   6   37.76    1.41 
  -4   6   6   38.60    1.28 
   4   6  -6   39.88    1.37 
  -4   6   6   40.40    1.11 
  -4   6   6   38.22    1.39 
  -4  -6   6   38.67    1.51 
  -4  -6   6   39.55    1.58 
  -4  -6   6   35.91    1.53 
  -4   6   5    2.39    0.30 
  -4   6   5    1.83    0.44 
   4   6  -5    3.03    0.58 
  -4  -6   5    2.18    0.44 
  -4  -6   5    2.28    0.39 
   4  -6  -5    2.53    0.38 
  -4   6   4   66.50    1.89 
  -4   6   4   68.69    1.57 
   4   6  -4   69.72    2.12 
  -4  -6   4   66.45    1.84 
   4  -6  -4   63.79    1.65 
  -4  -6   4   66.00    1.87 
  -4  -6   4   66.18    2.00 
  -4   6   3   47.18    1.46 
  -4   6   3   47.35    1.48 
  -4   6   3   46.54    1.17 
   4   6  -3   48.53    1.49 
  -4  -6   3   44.56    1.41 
  -4  -6   3   48.22    1.37 
   4  -6  -3   44.58    1.20 
  -4   6   2    5.20    0.50 
   4   6  -2    5.96    0.52 
  -4   6   2    5.21    0.48 
   4   6  -2    5.04    0.49 
  -4   6   2    5.41    0.35 
  -4  -6   2    5.36    0.38 
   4  -6  -2    5.20    0.34 
  -4  -6   2    4.61    0.45 
  -4   6   1    4.66    0.46 
  -4   6   1    4.57    0.35 
   4   6  -1    5.10    0.44 
   4   6  -1    5.32    0.49 
  -4  -6   1    4.30    0.32 
  -4  -6   1    5.17    0.46 
  -4   6   0    1.30    0.29 
  -4   6   0    0.87    0.27 
   4   6   0    1.06    0.24 
   4   6   0    0.89    0.31 
  -4  -6   0    1.16    0.21 
   4  -6   0    1.90    0.31 
   4  -6   0    0.64    0.24 
  -4  -6   0    1.21    0.30 
   4   6   1  115.55    2.49 
   4   6   1  119.92    2.83 
  -4   6  -1  119.92    2.67 
  -4   6  -1  113.36    2.74 
   4  -6   1  118.83    2.69 
  -4  -6  -1  118.25    2.47 
   4  -6   1  116.88    2.66 
  -4  -6  -1  111.22    2.77 
  -4   6  -2    2.31    0.43 
  -4   6  -2    3.89    0.41 
   4   6   2    2.52    0.26 
   4   6   2    2.53    0.42 
  -4  -6  -2    2.50    0.27 
  -4  -6  -2    2.87    0.43 
   4  -6   2    2.55    0.36 
  -4   6  -3   63.87    2.02 
   4   6   3   67.76    1.62 
  -4   6  -3   67.66    1.65 
   4  -6   3   67.47    1.68 
  -4  -6  -3   65.88    1.86 
   4  -6   3   64.79    1.84 
  -4  -6  -3   68.05    1.67 
  -4   6  -4    5.58    0.40 
   4   6   4    5.35    0.55 
   4   6   4    5.80    0.41 
  -4   6  -4    5.59    0.65 
  -4  -6  -4    6.38    0.55 
   4  -6   4    4.63    0.49 
   4  -6   4    6.25    0.44 
  -4  -6  -4    6.20    0.48 
  -4   6  -5    4.95    0.37 
   4   6   5    5.04    0.53 
   4   6   5    4.03    0.39 
  -4   6  -5    6.19    0.88 
  -4  -6  -5    4.83    0.51 
   4  -6   5    5.38    0.55 
   4  -6   5    4.66    0.38 
   4   6   6    5.30    0.47 
   4   6   6    5.22    0.58 
  -4   6  -6    6.66    0.97 
  -4   6  -6    6.02    0.39 
  -4  -6  -6    4.63    0.62 
  -4  -6  -6    4.17    0.53 
   4  -6   6    5.45    0.62 
   4   6   7    1.07    0.38 
   4   6   7    1.69    0.36 
  -4   6  -7    2.17    0.66 
  -4  -6  -7    0.86    0.33 
  -4  -6  -7    1.84    0.50 
   4   6   8   12.09    0.81 
   4   6   8   11.95    0.80 
  -4   6  -8   11.81    1.14 
   4   6   8   11.73    0.74 
  -4  -6  -8   10.31    0.90 
   4   6   9   12.61    0.81 
  -4   6  -9   15.02    1.31 
   4   6   9   13.64    0.87 
  -4  -6  -9   13.24    1.06 
  -4   6 -10    9.77    1.18 
   4   6  10    8.65    0.75 
  -4  -6 -10    8.57    1.09 
   4   6  11    6.06    0.69 
  -4   6 -11    7.89    1.36 
  -4  -6 -11    7.77    1.12 
   4   6  12   50.81    1.78 
  -4   6 -12   49.01    2.66 
  -4  -6 -12   47.97    2.28 
  -4   6 -13    0.62    0.76 
   4   6  13    0.61    0.46 
  -4  -6 -13    0.09    0.60 
   4   6  14   27.46    1.30 
  -4   6 -14   28.52    2.46 
  -4  -6 -14   27.18    1.89 
  -4   6 -15    0.18    0.79 
   4   6  15    0.54    0.54 
  -4  -6 -15    0.53    0.79 
   4   6  17    1.57    1.08 
  -4   7  19   10.22    1.19 
  -4   7  18    2.09    0.82 
   4   7 -18    1.50    0.83 
  -4   7  17    1.41    0.76 
   4   7 -17    1.80    0.67 
  -4   7  17    1.19    0.69 
  -4  -7  17    0.15    0.89 
  -4   7  16   -0.03    0.53 
   4   7 -16    0.91    1.04 
  -4   7  16    0.16    0.52 
  -4  -7  16    0.37    0.72 
  -4   7  15    4.10    0.85 
  -4   7  15    3.20    0.71 
   4   7 -15    4.56    0.82 
  -4  -7  15    3.80    1.03 
  -4   7  14    1.67    0.65 
   4   7 -14    1.62    0.52 
  -4   7  14    0.35    0.53 
  -4  -7  14    1.21    0.74 
  -4   7  13    0.56    0.46 
   4   7 -13    0.97    0.49 
  -4   7  13    2.07    0.66 
  -4  -7  13    0.39    0.66 
  -4   7  12    3.39    0.64 
  -4   7  12    6.36    0.72 
  -4   7  12    4.70    0.80 
   4   7 -12    4.54    0.70 
  -4   7  11    3.13    0.65 
   4   7 -11    2.42    0.56 
  -4   7  11    2.49    0.54 
  -4   7  11    4.45    0.78 
  -4  -7  11    3.76    0.87 
  -4   7  10   11.48    0.96 
  -4   7  10   12.80    0.81 
   4   7 -10   12.82    0.88 
  -4   7  10   14.84    0.90 
  -4  -7  10   12.06    1.15 
  -4   7   9    4.12    0.57 
  -4   7   9    5.58    0.52 
  -4   7   9    5.34    0.78 
   4   7  -9    5.79    0.72 
  -4  -7   9    4.93    0.83 
  -4   7   8   63.01    1.68 
   4   7  -8   61.85    1.96 
  -4   7   8   61.65    1.85 
  -4   7   8   65.78    2.11 
  -4  -7   8   63.02    2.29 
  -4  -7   8   62.67    2.28 
  -4  -7   8   62.70    1.95 
  -4   7   7   18.10    1.02 
   4   7  -7   19.21    0.97 
  -4   7   7   17.92    0.69 
  -4   7   7   16.48    0.83 
  -4  -7   7   18.40    1.12 
  -4  -7   7   15.83    1.08 
  -4  -7   7   18.16    0.91 
  -4   7   6    9.82    0.76 
   4   7  -6   11.38    0.76 
  -4   7   6    9.38    0.46 
  -4   7   6    9.71    0.87 
  -4  -7   6   10.17    0.68 
  -4  -7   6    9.36    0.90 
  -4   7   5   44.09    1.55 
  -4   7   5   44.00    1.12 
  -4   7   5   41.80    1.50 
   4   7  -5   43.00    1.48 
  -4  -7   5   42.04    1.42 
  -4  -7   5   44.62    1.63 
  -4  -7   5   42.88    1.52 
  -4   7   4   15.13    0.84 
  -4   7   4   15.91    0.55 
  -4   7   4   16.77    0.88 
   4   7  -4   15.63    0.85 
  -4  -7   4   14.60    0.79 
  -4  -7   4   16.66    0.82 
   4  -7  -4   15.17    0.64 
  -4  -7   4   15.13    0.87 
  -4   7   3   32.36    0.89 
  -4   7   3   34.10    1.26 
   4   7  -3   33.82    1.24 
  -4  -7   3   32.20    1.22 
  -4  -7   3   32.59    1.08 
   4  -7  -3   32.87    0.94 
  -4  -7   3   32.15    1.20 
  -4   7   2    1.16    0.22 
  -4   7   2    2.54    0.71 
   4   7  -2    1.64    0.38 
  -4  -7   2    1.25    0.33 
   4  -7  -2    1.85    0.27 
  -4  -7   2    1.84    0.27 
  -4   7   1   49.32    1.54 
   4   7  -1   50.81    1.45 
  -4   7   1   49.88    1.35 
   4   7  -1   50.42    1.60 
  -4  -7   1   50.70    1.26 
   4  -7  -1   51.26    1.41 
  -4  -7   1   51.28    1.77 
   4  -7  -1   51.02    1.56 
  -4   7   0    3.69    0.43 
   4   7   0    4.34    0.38 
  -4   7   0    4.11    0.40 
   4   7   0    3.93    0.52 
   4  -7   0    4.44    0.46 
   4  -7   0    4.16    0.36 
  -4  -7   0    4.29    0.30 
  -4  -7   0    4.30    0.48 
   4   7   1    1.15    0.34 
  -4   7  -1    1.84    0.38 
   4   7   1    1.43    0.25 
  -4   7  -1    0.91    0.30 
  -4  -7  -1    1.74    0.41 
   4  -7   1    1.10    0.29 
   4  -7   1    1.67    0.31 
  -4   7  -2   33.67    1.10 
   4   7   2   32.58    1.25 
   4   7   2   33.41    0.93 
  -4   7  -2   33.77    1.29 
   4  -7   2   32.58    1.13 
  -4  -7  -2   33.17    0.92 
  -4  -7  -2   32.04    1.23 
   4  -7   2   33.61    1.13 
  -4   7  -3   93.43    2.20 
  -4   7  -3   92.44    2.61 
   4   7   3   91.26    2.45 
   4  -7   3   90.61    2.24 
  -4  -7  -3   92.15    2.11 
  -4  -7  -3   88.35    2.42 
  -4   7  -4   24.03    0.87 
  -4   7  -4   22.40    1.21 
   4   7   4   24.37    0.80 
   4   7   4   22.32    1.04 
  -4  -7  -4   23.25    1.06 
  -4  -7  -4   23.44    0.89 
   4  -7   4   24.49    0.91 
   4   7   5   59.45    1.86 
  -4   7  -5   59.92    1.56 
  -4   7  -5   62.71    2.23 
   4   7   5   57.61    1.56 
  -4  -7  -5   62.67    1.78 
   4  -7   5   62.45    1.94 
  -4  -7  -5   56.91    1.84 
   4  -7   5   60.26    1.61 
  -4   7  -6    2.32    0.36 
  -4   7  -6    2.30    0.60 
   4   7   6    1.90    0.35 
   4   7   6    2.41    0.49 
  -4  -7  -6    2.23    0.57 
   4  -7   6    1.66    0.37 
  -4  -7  -6    1.78    0.43 
  -4   7  -7    1.68    0.60 
   4   7   7    1.48    0.34 
   4   7   7    2.01    0.49 
  -4   7  -7    1.55    0.31 
   4  -7   7    1.36    0.33 
  -4  -7  -7    0.68    0.40 
  -4   7  -8    1.07    0.57 
   4   7   8    1.01    0.31 
   4   7   8    0.81    0.44 
  -4  -7  -8    1.06    0.44 
   4   7   9   10.28    0.83 
   4   7   9   10.60    0.72 
  -4   7  -9   11.21    1.19 
  -4  -7  -9   10.63    0.96 
  -4   7 -10    1.74    0.74 
   4   7  10    0.88    0.47 
  -4  -7 -10    1.99    0.63 
  -4   7 -11    1.77    0.88 
   4   7  11    0.55    0.47 
  -4  -7 -11    2.05    0.68 
   4   7  12    1.83    0.56 
  -4   7 -12    3.04    0.93 
  -4  -7 -12    3.13    0.79 
  -4   7 -13    0.31    0.76 
   4   7  13    1.42    0.54 
  -4  -7 -13    3.42    0.90 
  -4   7 -14    0.28    0.89 
  -4  -7 -14   -0.82    0.74 
   4   7  15    0.62    0.56 
   4   7  16    0.72    0.98 
   4   7  17    9.35    1.77 
  -4   8  18   26.06    1.75 
  -4   8  18   27.90    1.69 
  -4   8  17    2.78    0.81 
   4   8 -17    0.95    0.71 
  -4  -8  17    2.58    1.14 
  -4   8  16    6.69    1.22 
  -4   8  16    7.78    1.08 
   4   8 -16    7.43    1.03 
  -4  -8  16    6.79    1.36 
  -4   8  15    1.19    0.56 
  -4   8  15   -0.02    0.57 
  -4  -8  15    1.43    0.79 
  -4   8  14    5.20    0.86 
   4   8 -14    6.91    0.92 
  -4   8  14    7.08    0.89 
  -4  -8  14    5.91    1.17 
   4   8 -13    8.23    0.85 
  -4   8  13    9.69    0.84 
  -4   8  13    8.48    0.98 
  -4  -8  13   10.20    1.45 
  -4   8  12    5.09    0.68 
   4   8 -12    4.25    0.75 
  -4   8  12    3.43    0.73 
  -4   8  12    5.66    0.65 
  -4  -8  12    3.54    0.91 
  -4   8  11   27.22    1.69 
  -4   8  11   25.81    1.18 
   4   8 -11   26.49    1.29 
  -4   8  11   22.31    1.55 
  -4  -8  11   27.21    1.70 
  -4   8  10   11.92    0.98 
  -4   8  10   11.34    0.78 
  -4   8  10   12.57    0.72 
   4   8 -10   12.94    0.93 
  -4  -8  10   13.66    1.19 
  -4   8   9    6.87    0.79 
   4   8  -9    7.59    0.74 
  -4   8   9    7.49    0.53 
  -4   8   9    6.71    0.61 
  -4  -8   9    7.84    0.94 
  -4   8   8    8.96    0.84 
  -4   8   8   10.26    0.52 
   4   8  -8    7.75    0.74 
  -4   8   8    8.26    0.62 
  -4  -8   8    8.93    0.93 
   4   8  -7    5.01    0.66 
  -4   8   7    3.62    0.64 
  -4  -8   7    4.34    0.69 
  -4   8   6    3.49    0.57 
   4   8  -6    3.12    0.60 
  -4  -8   6    2.58    0.57 
  -4  -8   6    3.42    0.63 
  -4   8   5    0.32    0.34 
   4   8  -5    0.13    0.32 
  -4  -8   5    0.19    0.34 
  -4  -8   5    0.19    0.32 
   4   8  -4    0.26    0.34 
  -4   8   4   -0.16    0.27 
  -4   8   4    0.01    0.34 
  -4  -8   4    0.05    0.31 
  -4  -8   4    0.52    0.30 
  -4  -8   4   -0.07    0.24 
   4   8  -3   48.05    1.64 
  -4   8   3   48.87    1.65 
  -4   8   3   51.04    1.66 
  -4  -8   3   48.62    1.40 
  -4  -8   3   49.87    1.59 
  -4  -8   3   49.98    1.63 
   4   8  -2   44.16    1.53 
  -4   8   2   42.98    1.49 
  -4  -8   2   43.69    1.38 
  -4  -8   2   44.38    1.19 
   4  -8  -2   41.68    1.11 
  -4  -8   2   41.93    1.48 
  -4   8   1   15.91    0.85 
  -4   8   1   16.87    0.70 
   4   8  -1   18.09    0.94 
  -4  -8   1   16.70    0.88 
   4  -8  -1   16.34    0.88 
  -4  -8   1   15.56    0.72 
   4  -8  -1   16.68    0.64 
  -4  -8   1   16.00    0.58 
  -4   8   0   20.62    0.88 
  -4   8   0   21.35    0.96 
   4   8   0   22.34    1.05 
   4  -8   0   21.44    0.80 
  -4  -8   0   22.70    1.03 
  -4   8  -1   45.78    1.51 
  -4   8  -1   47.21    1.85 
   4   8   1   45.08    1.59 
  -4  -8  -1   45.24    1.61 
   4  -8   1   46.12    1.49 
   4  -8   1   46.47    1.36 
  -4   8  -2   34.43    1.37 
  -4   8  -2   37.06    1.25 
   4   8   2   33.92    1.36 
   4  -8   2   32.72    1.21 
   4  -8   2   33.95    1.17 
  -4   8  -3    8.52    0.95 
   4   8   3    8.44    0.72 
  -4   8  -3    9.05    0.60 
   4  -8   3    8.94    0.63 
   4  -8   3    9.67    0.64 
  -4   8  -4  171.87    4.36 
   4   8   4  166.87    4.08 
  -4   8  -4  173.05    3.76 
   4  -8   4  173.47    3.82 
   4   8   5   49.25    1.73 
   4   8   5   49.52    1.31 
  -4   8  -5   49.12    1.44 
  -4   8  -5   50.77    2.03 
  -4  -8  -5   47.56    1.47 
   4  -8   5   51.58    1.51 
   4  -8   5   46.73    1.69 
  -4   8  -6   20.72    1.36 
   4   8   6   21.56    0.82 
  -4   8  -6   22.33    0.88 
   4   8   6   22.79    1.14 
   4  -8   6   22.19    0.91 
  -4  -8  -6   21.12    1.00 
  -4   8  -7   25.56    1.58 
   4   8   7   23.20    1.18 
  -4   8  -7   23.41    0.89 
   4   8   7   22.89    0.92 
  -4  -8  -7   24.15    1.14 
   4  -8   7   23.86    0.93 
   4   8   8    0.15    0.43 
   4   8   8    0.40    0.26 
  -4   8  -8   -0.01    0.26 
  -4   8  -8    0.43    0.54 
   4  -8   8    0.29    0.31 
  -4  -8  -8    0.42    0.36 
   4   8   9   12.12    0.95 
   4   8   9   13.01    0.79 
  -4   8  -9   19.14    2.70 
  -4  -8  -9   14.36    1.03 
   4   8  10   -0.12    0.44 
  -4   8 -10    0.41    0.60 
  -4  -8 -10    0.65    0.55 
  -4   8 -11    1.41    0.81 
   4   8  11    0.81    0.48 
  -4  -8 -11    1.70    0.68 
  -4   8 -12    2.69    0.92 
  -4  -8 -12    1.62    0.75 
  -4   8 -13    1.04    1.35 
   4   8  13    0.41    0.51 
  -4   8 -14    0.36    0.78 
   4   8  14    1.12    0.61 
   4   8  15    1.99    0.65 
   4   8  15    1.55    0.91 
  -4   9  17   10.07    1.53 
   4   9 -17   10.60    1.23 
  -4   9  17   11.10    1.24 
   4   9 -16    5.41    0.94 
  -4   9  16    6.21    0.89 
  -4  -9  16    5.21    1.22 
  -4   9  15    0.44    0.50 
   4   9 -15   -0.43    0.51 
  -4   9  15    0.25    0.56 
  -4  -9  15    0.44    0.68 
   4   9 -14   57.22    2.31 
  -4   9  14   66.81    2.55 
  -4   9  14   63.31    2.11 
  -4  -9  14   68.16    3.09 
  -4   9  13   -0.13    0.47 
   4   9 -13    0.84    0.47 
  -4   9  13    0.46    0.35 
  -4  -9  13    0.18    0.59 
   4   9 -12    2.92    0.66 
  -4   9  12    2.27    0.45 
  -4   9  12    2.11    0.66 
  -4  -9  12    2.63    0.82 
  -4   9  11    1.01    0.35 
  -4   9  11    0.08    0.28 
  -4   9  11   -0.34    0.48 
   4   9 -11    0.17    0.39 
  -4  -9  11   -0.39    0.49 
  -4   9  10   27.44    0.98 
  -4   9  10   29.73    1.61 
   4   9 -10   26.46    1.33 
  -4  -9  10   27.42    1.66 
  -4   9   9    1.81    0.58 
   4   9  -9    2.78    0.60 
  -4  -9   9    3.03    0.72 
   4   9  -8    2.00    0.55 
  -4   9   8    1.56    0.53 
  -4  -9   8    0.92    0.51 
   4   9  -7    5.14    0.75 
  -4   9   7    4.77    0.73 
  -4  -9   7    6.09    0.83 
  -4  -9   7    6.16    0.76 
  -4   9   6    0.77    0.48 
   4   9  -6    0.76    0.40 
  -4  -9   6    0.19    0.38 
   4   9  -5    7.22    0.72 
  -4   9   5    6.82    0.73 
  -4  -9   5    8.32    0.74 
  -4  -9   5    5.96    0.62 
   4   9  -4   32.56    1.38 
  -4   9   4   34.68    1.44 
  -4  -9   4   32.02    1.31 
  -4  -9   4   34.47    1.21 
  -4   9   3   45.85    1.65 
   4   9  -3   44.52    1.63 
  -4  -9   3   46.68    1.33 
  -4  -9   3   45.02    1.50 
   4   9  -2    2.85    0.53 
  -4   9   2    2.34    0.49 
  -4  -9   2    2.52    0.30 
  -4  -9   2    1.58    0.39 
  -4   9   1   12.14    0.64 
  -4   9   1   12.41    0.81 
   4   9  -1   13.39    0.88 
   4  -9  -1   12.06    0.86 
   4  -9  -1   12.68    0.61 
   4   9   0   10.78    0.81 
  -4   9   0    9.48    0.65 
  -4   9   0   11.14    0.75 
   4  -9   0   10.21    0.75 
   4  -9   0    9.89    0.54 
   4   9   1   27.38    1.25 
  -4   9  -1   26.74    1.16 
  -4   9  -1   27.80    1.14 
   4  -9   1   25.47    0.95 
   4  -9   1   27.41    1.17 
  -4   9  -2   80.35    2.20 
  -4   9  -2   80.64    2.40 
   4   9   2   83.56    2.45 
   4  -9   2   82.07    2.28 
   4  -9   2   79.79    2.11 
  -4   9  -3    2.97    0.50 
  -4   9  -3    1.38    0.56 
   4   9   3    1.89    0.51 
   4  -9   3    2.28    0.47 
   4  -9   3    2.53    0.43 
   4   9   4   45.07    1.68 
  -4   9  -4   42.78    1.41 
  -4   9  -4   44.61    1.83 
   4  -9   4   40.10    1.48 
  -4   9  -5    0.02    0.39 
  -4   9  -5    0.13    0.29 
   4   9   5   -0.02    0.39 
   4  -9   5    0.37    0.31 
  -4   9  -6   47.89    2.13 
   4   9   6   48.10    1.81 
   4  -9   6   46.87    1.51 
  -4   9  -7    7.92    0.60 
  -4   9  -7    8.94    1.18 
   4   9   7    8.72    0.83 
   4  -9   7    7.71    0.62 
  -4   9  -8    9.00    1.24 
   4   9   8    8.41    0.81 
   4   9   8    7.24    0.54 
  -4   9  -8    7.88    0.59 
  -4  -9  -8    8.18    0.76 
   4  -9   8    8.47    0.62 
  -4   9  -9   19.51    0.83 
   4   9   9   18.75    1.16 
  -4   9  -9   20.71    1.62 
   4   9   9   18.13    0.89 
  -4  -9  -9   20.00    1.47 
   4   9  10    2.08    0.47 
  -4   9 -10    2.42    0.89 
   4   9  10    1.50    0.62 
  -4  -9 -10    2.75    0.71 
   4   9  11    5.24    0.77 
  -4   9 -11    6.13    1.20 
   4   9  12    1.30    0.57 
  -4   9 -12    0.13    0.69 
  -4   9 -13    7.13    1.38 
   4   9  13    6.68    0.92 
   4   9  13    6.21    1.07 
   4   9  14    0.30    0.86 
   4   9  14   -0.13    0.53 
   4   9  15    1.50    0.80 
   4  10 -17    4.16    1.43 
  -4  10  16    2.32    0.82 
   4  10 -16    3.73    0.88 
  -4 -10  16    3.29    1.09 
   4  10 -15    7.52    1.05 
  -4  10  15    6.91    1.37 
  -4  10  15    8.95    1.02 
  -4 -10  15    8.77    1.71 
  -4  10  14    0.83    0.66 
   4  10 -14   -0.31    0.49 
  -4  10  14    0.39    0.41 
  -4 -10  14    0.16    0.74 
   4  10 -13   41.64    1.81 
  -4  10  13   42.40    2.02 
  -4 -10  13   46.01    2.43 
   4  10 -12    0.81    0.57 
  -4  10  12    0.26    0.51 
  -4 -10  12   -0.46    0.54 
  -4  10  11   16.11    1.23 
   4  10 -11   16.77    1.14 
  -4 -10  11   17.15    1.42 
   4  10 -10    4.13    0.78 
  -4  10  10    2.81    0.70 
  -4 -10  10    3.69    0.79 
  -4  10   9    0.90    0.48 
   4  10  -9    1.96    0.58 
  -4 -10   9    2.43    0.68 
   4  10  -8    3.62    0.66 
  -4 -10   8    5.94    0.91 
  -4  10   7    7.08    0.80 
   4  10  -7    8.68    1.01 
  -4 -10   7    7.05    0.80 
  -4 -10   7    7.35    0.84 
  -4  10   6   35.94    1.62 
   4  10  -6   37.02    1.58 
  -4 -10   6   42.64    1.70 
  -4 -10   6   37.32    1.52 
   4  10  -5    1.28    0.47 
  -4  10   5    0.96    0.48 
  -4 -10   5    1.65    0.44 
  -4 -10   5    2.38    0.55 
  -4  10   4    0.69    0.40 
   4  10  -4    0.37    0.41 
  -4 -10   4    0.54    0.31 
  -4 -10   4    0.85    0.37 
   4  10  -3   -0.15    0.36 
  -4  10   3   -0.12    0.33 
  -4 -10   3   -0.07    0.20 
  -4 -10   3    0.46    0.32 
   4  10  -2    0.00    0.36 
  -4  10   2    0.34    0.39 
   4  10  -1   72.54    2.31 
  -4  10   1   74.70    2.26 
  -4  10   0   26.22    1.21 
   4  10   0   28.41    1.34 
  -4  10   0   25.71    1.07 
   4 -10   0   26.31    0.90 
   4  10   1   63.72    2.12 
  -4  10  -1   63.00    1.96 
  -4  10  -1   60.12    1.92 
   4 -10   1   60.80    1.68 
   4  10   2   11.06    0.89 
  -4  10  -2   10.49    0.85 
  -4  10  -2   12.00    0.80 
   4 -10   2   10.74    0.66 
  -4  10  -3    5.17    0.65 
  -4  10  -3    3.96    0.66 
   4  10   3    3.92    0.69 
   4  10   4   22.07    1.23 
  -4  10  -4   23.91    1.35 
  -4  10  -4   22.12    1.04 
   4 -10   4   21.95    1.05 
   4 -10   4   20.91    1.06 
  -4  10  -5    6.68    0.94 
   4  10   5    5.41    0.75 
  -4  10  -5    5.71    0.58 
   4 -10   5    6.13    0.65 
   4  10   6   18.60    1.18 
  -4  10  -6   18.21    1.36 
  -4  10  -6   19.06    0.94 
   4 -10   6   18.40    0.97 
  -4  10  -7    4.86    0.97 
  -4  10  -7    3.96    0.55 
   4 -10   7    5.54    0.65 
  -4  10  -8    0.83    0.38 
   4  10   8    0.31    0.48 
   4 -10   8    1.16    0.44 
  -4  10  -9    8.44    0.84 
  -4  10  -9    9.97    1.40 
   4  10   9    7.73    0.90 
   4 -10   9    7.20    0.78 
  -4  10 -10    0.88    0.74 
   4  10  10   -0.29    0.46 
  -4  10 -10    0.13    0.37 
  -4  10 -11    2.93    1.07 
   4  10  11    3.09    0.70 
   4  10  11    1.88    0.65 
   4  10  12    7.33    0.99 
   4  10  12    8.76    1.04 
  -4  10 -12    6.85    1.78 
  -4  10 -13   15.72    1.82 
   4  10  13   16.91    1.26 
   4  10  14    2.81    0.83 
   4  11 -16    3.53    0.98 
  -4  11  15    3.50    0.90 
   4  11 -15    3.49    0.86 
  -4 -11  15    6.43    1.34 
  -4  11  14    3.52    0.82 
   4  11 -14    3.03    0.79 
  -4 -11  14    3.79    1.05 
   4  11 -13   17.06    1.23 
  -4  11  13   14.77    1.30 
  -4 -11  13   19.92    1.67 
  -4  11  12    5.74    0.91 
   4  11 -12    8.93    0.92 
  -4 -11  12   10.69    1.41 
  -4  11  11   13.70    1.20 
   4  11 -11   12.64    1.08 
  -4 -11  11   14.33    1.37 
   4  11 -10    4.28    0.84 
  -4  11  10    4.11    0.77 
  -4 -11  10    4.19    0.87 
   4  11  -9    0.95    0.82 
  -4  11   9    2.84    0.78 
  -4 -11   9    3.35    0.75 
   4  11  -8    8.27    0.95 
  -4  11   8    8.23    0.91 
  -4 -11   8    9.19    0.94 
  -4  11   7    6.84    0.96 
   4  11  -7    5.33    0.85 
  -4 -11   7    5.94    0.73 
  -4  11   6   27.52    1.73 
   4  11  -6   28.20    1.41 
  -4 -11   6   29.83    1.39 
  -4 -11   6   30.43    1.32 
   4  11  -5   25.65    1.33 
  -4  11   5   21.11    1.25 
  -4 -11   5   23.07    1.32 
  -4 -11   5   23.31    1.14 
   4  11  -4    1.83    0.54 
  -4  11   4    0.98    0.48 
  -4 -11   4    1.69    0.36 
  -4 -11   4    2.12    0.44 
  -4  11   3    1.87    0.55 
   4  11  -3    2.39    0.57 
  -4 -11   3    2.13    0.33 
  -4 -11   3    2.11    0.39 
  -4  11   2    3.64    0.65 
   4  11  -2    2.68    0.59 
   4  11  -1    9.06    0.85 
  -4  11   1    9.57    0.82 
  -4  11   0   31.03    1.38 
   4  11   0   31.60    1.49 
   4  11   1    0.74    0.47 
  -4  11  -1    1.02    0.41 
  -4  11  -1    0.96    0.41 
   4 -11   1    0.76    0.26 
  -4  11  -2    8.87    0.75 
   4  11   2    8.25    0.83 
  -4  11  -2    8.19    0.78 
   4 -11   2    7.86    0.58 
   4  11   3    2.06    0.64 
  -4  11  -3    2.06    0.56 
  -4  11  -3    2.47    0.50 
   4 -11   3    2.59    0.49 
  -4  11  -4    4.18    0.61 
  -4  11  -4    3.82    0.76 
   4  11   4    4.12    1.13 
   4 -11   4    4.55    0.56 
  -4  11  -5    6.24    0.65 
  -4  11  -5    6.49    1.00 
   4  11   5    5.82    0.83 
   4  11   6   36.66    1.72 
  -4  11  -6   42.51    2.07 
  -4  11  -6   40.00    1.47 
  -4  11  -7    1.34    0.65 
  -4  11  -7    0.93    0.45 
   4  11   7    1.77    0.60 
  -4  11  -8    0.70    0.40 
  -4  11  -8    1.94    0.77 
   4  11   8    0.93    0.54 
  -4  11  -9   -0.32    0.58 
  -4  11  -9    0.25    0.41 
   4  11   9    0.67    0.53 
  -4  11 -10    0.79    0.46 
  -4  11 -10    2.70    0.99 
   4  11  10    1.76    0.62 
  -4  11 -11    9.29    1.52 
   4  11  11   10.58    1.06 
  -4  11 -12    0.45    0.79 
   4  11  12    0.96    0.62 
   4  11  14   14.09    1.33 
   4  12 -15   -1.39    0.72 
  -4 -12  15    0.08    1.22 
  -4  12  14   -0.05    0.59 
   4  12 -14    0.79    0.74 
  -4 -12  14    0.23    0.84 
   4  12 -13    1.07    0.65 
  -4  12  13    0.55    0.63 
  -4 -12  13    0.93    0.86 
   4  12 -12   -0.27    0.49 
  -4 -12  12    1.05    0.74 
   4  12 -11    4.84    0.87 
  -4  12  11    5.79    0.96 
  -4 -12  11    5.97    1.05 
  -4  12  10    2.44    0.75 
   4  12 -10    3.18    0.72 
  -4 -12  10    3.34    1.01 
   4  12  -9   -0.68    0.44 
  -4  12   9    0.24    0.49 
  -4 -12   9    0.95    0.54 
  -4  12   8    4.37    0.87 
   4  12  -8    2.16    0.69 
  -4 -12   8    2.83    0.65 
  -4  12   7    0.80    0.51 
   4  12  -7    0.39    0.48 
  -4 -12   7    0.95    0.42 
   4  12  -6    0.69    0.48 
  -4  12   6   -0.21    0.41 
  -4 -12   6    0.28    0.34 
  -4 -12   6    0.31    0.45 
   4  12  -5    3.76    0.69 
  -4  12   5    3.99    0.82 
  -4 -12   5    3.05    0.52 
   4  12  -4    2.50    0.63 
  -4  12   4    2.85    0.63 
  -4 -12   4    2.32    0.47 
  -4 -12   4    2.48    0.42 
  -4  12   3    1.65    0.67 
   4  12  -3    1.66    0.57 
  -4  12   2   -0.20    0.36 
   4  12  -2    0.73    0.45 
   4  12  -1   27.43    1.44 
  -4  12   1   29.99    1.43 
   4  12   0    4.73    0.74 
  -4  12   0    7.43    0.91 
   4  12   1    0.15    0.42 
  -4  12  -1    0.81    0.40 
  -4  12  -1   -0.17    0.38 
  -4  12  -2    0.89    0.43 
  -4  12  -2    0.44    0.38 
   4  12   2    0.08    0.46 
   4 -12   2    0.13    0.28 
  -4  12  -3   28.50    1.43 
  -4  12  -3   26.73    1.28 
   4  12   3   24.68    1.43 
   4 -12   3   27.00    1.16 
  -4  12  -4   10.80    0.85 
   4  12   4   10.65    0.99 
  -4  12  -4   13.00    1.08 
  -4  12  -5    4.07    0.64 
   4  12   5    4.52    0.78 
  -4  12  -5    4.73    0.86 
   4  12   6    1.59    0.62 
  -4  12  -6    3.04    0.79 
  -4  12  -6    3.00    0.58 
  -4  12  -7    1.36    0.77 
   4  12   7   -0.37    0.46 
  -4  12  -7    0.66    0.42 
  -4  12  -8    0.64    0.43 
  -4  12  -8    0.19    0.63 
   4  12   8   -0.42    0.47 
  -4  12  -9    5.19    1.12 
   4  12   9    3.67    0.80 
  -4  12  -9    4.76    0.72 
  -4  12 -10    5.04    1.24 
   4  12  10    2.73    0.74 
  -4  12 -10    2.87    0.67 
  -4  12 -11    5.21    2.06 
   4  12  12    1.05    0.69 
  -4  12 -12    1.71    0.95 
   4  12  13    3.44    0.97 
   4  13 -15    1.25    1.03 
   4  13 -14   -0.06    0.94 
  -4 -13  14    0.56    0.95 
   4  13 -13    1.22    0.75 
  -4 -13  13    0.49    0.87 
   4  13 -12    0.81    0.69 
  -4  13  12    0.95    0.65 
  -4 -13  12    1.19    0.76 
   4  13 -11    3.83    0.88 
  -4  13  11    3.81    0.86 
  -4 -13  11    4.71    1.02 
   4  13 -10    0.90    0.56 
  -4  13  10    0.11    0.55 
  -4 -13  10    1.26    0.68 
  -4  13   9    0.34    0.51 
   4  13  -9   -0.04    0.48 
  -4 -13   9   -0.22    0.55 
  -4  13   8   17.71    1.31 
   4  13  -8   16.58    1.22 
  -4 -13   8   19.11    1.22 
   4  13  -7    0.38    0.53 
  -4  13   7    0.83    0.52 
  -4 -13   7    0.77    0.45 
  -4  13   6    0.73    0.51 
   4  13  -6    0.83    0.51 
  -4 -13   6   -0.35    0.32 
  -4 -13   6    1.29    0.60 
  -4  13   5    0.69    0.53 
   4  13  -5    0.81    0.56 
  -4 -13   5    1.21    0.48 
  -4 -13   5    0.66    0.49 
   4  13  -4   -0.51    0.39 
  -4  13   4    0.63    0.50 
   4  13  -3   13.92    1.09 
  -4  13   3   11.12    1.01 
   4  13  -2    1.81    0.59 
  -4  13   2    1.22    0.55 
  -4  13   1    0.10    0.42 
   4  13  -1   -0.04    0.43 
  -4  13   0    3.49    0.67 
   4  13   0    2.61    0.63 
   4  13   1   -0.35    0.38 
  -4  13  -1    0.07    0.40 
   4  13   2   -0.33    0.43 
   4 -13   2    0.09    0.34 
  -4  13  -3   22.12    1.27 
   4  13   3   20.87    1.35 
  -4  13  -3   22.09    1.43 
   4 -13   3   19.50    1.06 
  -4  13  -4   12.94    1.09 
  -4  13  -4   11.31    0.93 
   4  13   4   14.41    1.17 
  -4  13  -5    1.78    0.55 
   4  13   5    0.94    0.60 
  -4  13  -5    2.96    0.71 
   4  13   6    0.94    0.55 
  -4  13  -6    0.39    0.49 
  -4  13  -6    1.02    0.64 
  -4  13  -7    3.19    0.95 
  -4  13  -7    2.53    0.61 
   4  13   7    1.88    0.68 
  -4  13  -8    3.21    0.94 
   4  13   8    3.88    0.81 
  -4  13  -8    2.89    0.63 
  -4  13  -9    2.46    0.71 
  -4  13  -9    3.23    0.92 
  -4  13 -10   12.85    1.49 
   4  13  10    8.64    1.18 
   4  13  11    1.55    0.78 
   4  14 -14    0.51    0.97 
   4  14 -13    0.96    0.77 
  -4 -14  13    2.85    1.16 
  -4 -14  12   34.82    2.21 
  -4  14  11   11.45    2.10 
   4  14 -11   11.63    1.21 
  -4 -14  11   12.12    1.34 
   4  14 -10    0.54    0.57 
  -4  14  10   -0.50    0.52 
  -4 -14  10   -0.01    0.65 
  -4  14   9   -0.74    0.45 
   4  14  -9    0.58    0.58 
  -4 -14   9    0.92    0.73 
   4  14  -8    0.50    0.56 
  -4  14   8    0.28    0.73 
  -4 -14   8    0.48    0.56 
   4  14  -7    0.80    0.64 
  -4  14   7    1.31    0.59 
  -4 -14   7    1.05    0.49 
   4  14  -6    1.33    0.62 
  -4  14   6    1.54    0.66 
  -4 -14   6    1.69    0.47 
   4  14  -5    0.14    0.52 
  -4  14   5   -0.15    0.45 
   4  14  -4    1.68    0.65 
  -4  14   4    2.02    0.64 
  -4  14   3    1.32    0.55 
   4  14  -3    0.23    0.50 
  -4  14   2    0.29    0.49 
   4  14  -2    0.30    0.51 
   4  14  -1   -0.11    0.46 
  -4  14   1    0.27    0.42 
   4  14   0    5.76    0.92 
  -4  14   0    8.51    0.90 
   4  14   1    0.76    0.54 
  -4  14  -1    0.05    0.46 
  -4  14  -2    0.76    0.52 
   4  14   2    0.30    0.52 
   4  14   3    0.49    0.54 
  -4  14  -3    0.12    0.50 
  -4  14  -4    1.67    0.64 
   4  14   4    0.94    0.60 
  -4  14  -5    1.47    0.57 
  -4  14  -6    3.71    0.78 
   4  14   6    6.16    1.35 
   4  14   7    0.25    0.63 
  -4  14  -7    0.93    0.60 
  -4  14  -8    0.88    0.66 
   4  14   8    0.53    0.72 
   4  14   9    0.95    0.76 
  -4  14  -9    0.60    0.84 
  -4 -15  13    2.01    1.37 
   4  15 -12    0.80    0.96 
  -4 -15  12    2.51    1.40 
   4  15 -11    0.60    0.75 
  -4 -15  11   -1.61    0.84 
   4  15 -10    1.54    0.74 
  -4 -15  10    0.46    0.81 
  -4  15   9    2.68    1.17 
   4  15  -9    2.91    0.85 
  -4 -15   9    3.16    1.01 
  -4  15   8    3.84    0.85 
  -4 -15   8    4.62    0.88 
  -4  15   7    0.56    0.57 
   4  15  -7   -0.11    0.57 
  -4 -15   7    0.04    0.55 
   4  15  -6    3.24    0.76 
  -4  15   6    3.13    0.80 
   4  15  -5   27.99    1.66 
  -4  15   5   28.43    1.85 
   4  15  -4    0.33    0.54 
  -4  15   4    0.37    0.60 
  -4  15   3   11.41    1.09 
   4  15  -3    9.53    1.05 
   4  15  -2   -0.54    0.46 
  -4  15   2    0.53    0.59 
   4  15  -1   -0.17    0.50 
  -4  15   1    0.99    0.55 
  -4  15   0   13.96    1.13 
   4  15   0   10.36    1.13 
  -4  15  -1    8.45    0.96 
   4  15   1    8.82    1.03 
   4  15   2    3.94    1.14 
  -4  15  -2    3.84    0.76 
   4  15   3    5.82    1.18 
  -4  15  -3    4.48    0.83 
  -4  15  -4    0.38    0.55 
   4  15   4    0.04    0.60 
   4 -15   4    0.18    0.85 
   4  15   5    0.47    0.65 
  -4  15  -5    0.74    0.54 
   4 -15   5   -0.20    0.95 
   4  15   6   -0.14    0.59 
  -4  15  -6    0.50    0.57 
   4 -15   6    0.39    1.12 
  -4  15  -7    0.92    0.74 
   4 -15   7    1.46    1.13 
  -4  15  -8    1.07    0.83 
   4 -15   8   -0.14    1.15 
   4 -15   9   -0.79    1.25 
   4 -15  10   22.45    2.66 
   4  16  -8    3.21    0.80 
   4  16  -7    6.53    1.12 
   4  16  -6    0.72    0.67 
  -4  16   6    0.52    0.72 
   4  16  -5   11.87    1.26 
  -4  16   5   13.42    1.28 
   4  16  -4    4.09    0.86 
  -4  16   4    3.17    0.76 
   4  16  -3    0.49    0.60 
  -4  16   3    0.84    0.60 
  -4  16   2    4.54    0.81 
   4  16  -2    3.36    0.82 
   4  16  -1    3.23    0.88 
   4  16   0    3.60    0.86 
  -4  16   0    4.53    0.94 
  -4  16  -1    2.30    0.72 
   4  16   1    2.30    0.77 
   4  16   2    0.34    0.59 
  -4  16  -2    1.65    0.61 
  -4  16  -3    2.33    0.77 
   4  16   3    3.25    0.95 
  -4  16  -4    0.19    0.61 
  -4  16  -5    8.34    1.12 
  -4  16  -6    2.47    0.86 
  -4  16  -7    1.40    0.92 
  -4  17   2   31.99    2.77 
  -4  17   1   24.31    1.69 
  -4  17   0    1.10    0.66 
  -4  17  -1    1.07    0.74 
  -4  17  -2    0.15    0.64 
  -4  17  -3    1.63    0.78 
  -4  17  -4    7.91    1.13 
  -4  17  -5    2.54    0.92 
  -4  17  -6   -0.96    0.93 
  -5   0  20   14.64    1.22 
  -5   0  19   -0.56    0.79 
  -5   0  18   22.85    1.93 
   5   0 -17   -0.40    0.50 
  -5   0  17    1.02    0.77 
  -5   0  16   38.96    2.27 
   5   0 -16   40.62    1.67 
  -5   0  15   -0.50    0.53 
   5   0 -15    0.16    0.42 
  -5   0  14    0.26    0.54 
   5   0 -14   -0.43    0.36 
   5   0 -13   -0.23    0.31 
  -5   0  13    0.06    0.50 
  -5   0  12   19.17    1.36 
   5   0 -12   17.86    1.01 
  -5   0  11   -0.12    0.27 
   5   0 -11    0.28    0.33 
  -5   0  11    0.42    0.45 
  -5   0  10    0.10    0.25 
  -5   0  10    0.35    0.39 
  -5   0  10    0.64    0.43 
   5   0 -10    0.29    0.31 
   5   0  -9    0.13    0.35 
  -5   0   9   -0.17    0.35 
  -5   0   9   -0.03    0.32 
  -5   0   9    0.21    0.22 
  -5   0   8  424.97    9.09 
  -5   0   8  437.00    9.02 
   5   0  -8  437.44    8.61 
  -5   0   8  418.29    8.54 
  -5   0   7    0.29    0.29 
  -5   0   7    0.20    0.24 
   5   0  -7   -0.03    0.27 
   5   0  -7    0.08    0.33 
  -5   0   6  136.60    3.32 
   5   0  -6  137.90    3.11 
   5   0  -6  140.95    3.44 
  -5   0   6  133.92    3.07 
   5   0  -5    0.10    0.29 
   5   0  -5    0.00    0.27 
  -5   0   5   -0.19    0.21 
  -5   0   5   -0.11    0.22 
   5   0  -4    1.84    0.35 
   5   0  -4    2.14    0.34 
  -5   0   4    1.51    0.25 
  -5   0   4    1.45    0.28 
   5   0  -3   -0.04    0.16 
  -5   0   3   -0.17    0.13 
   5   0  -3    0.03    0.15 
  -5   0   3    0.01    0.13 
  -5   0   2    7.73    0.42 
  -5   0   2    7.87    0.41 
   5   0  -2    8.60    0.45 
  -5   0   1    0.02    0.06 
   5   0  -1   -0.06    0.13 
   5   0  -1   -0.03    0.10 
  -5   0   1    0.12    0.10 
   5   0   0    2.31    0.23 
  -5   0   0    2.82    0.24 
   5   0   0    2.76    0.28 
  -5   0   0    2.72    0.29 
   5   0   1   -0.41    0.12 
  -5   0  -1    0.09    0.17 
  -5   0  -1   -0.08    0.13 
   5   0   1   -0.01    0.14 
  -5   0  -2    2.21    0.37 
  -5   0  -2    2.04    0.20 
   5   0   2    1.25    0.17 
   5   0   2    1.54    0.33 
  -5   0  -3   -0.13    0.21 
   5   0   3    0.05    0.20 
  -5   0  -4    7.10    0.59 
   5   0   4    6.44    0.52 
   5   0   5   -0.07    0.17 
  -5   0  -5    0.05    0.26 
  -5   0  -6    2.35    0.49 
   5   0   6    2.03    0.41 
  -5   0  -7    0.28    0.35 
  -5   0  -8    4.81    0.79 
  -5   0  -9    0.02    0.38 
  -5   0 -10   97.89    3.40 
  -5   0 -11    0.30    0.57 
  -5   0 -12   18.37    1.58 
  -5   0 -13    0.56    0.65 
  -5   0 -14    5.74    1.24 
  -5   0 -15    1.04    1.10 
  -5   0 -16    1.28    0.91 
  -5   1  20    2.87    0.84 
  -5   1  19   -0.01    0.55 
  -5   1  19    0.67    0.78 
  -5  -1  19    0.50    0.86 
  -5   1  18    1.31    0.85 
   5   1 -18    1.42    0.64 
  -5  -1  18    0.32    0.79 
  -5   1  17    8.27    1.44 
  -5  -1  17    5.84    1.19 
  -5   1  16    0.27    0.61 
   5   1 -16    0.58    0.50 
   5  -1 -16    0.75    0.46 
  -5  -1  16    0.39    0.66 
  -5   1  15    0.14    0.59 
   5   1 -15   -0.06    0.38 
   5  -1 -15    0.46    0.42 
  -5  -1  15    0.17    0.58 
  -5   1  14    9.22    1.10 
   5   1 -14    8.98    0.81 
  -5  -1  14   12.72    1.88 
   5  -1 -14    8.30    0.80 
   5   1 -13    5.46    0.77 
  -5   1  13    4.28    0.91 
   5  -1 -13    6.02    0.79 
  -5  -1  13    4.52    0.99 
   5   1 -12   -0.04    0.37 
  -5   1  12    0.08    0.46 
  -5  -1  12   -0.16    0.46 
   5  -1 -12    0.51    0.40 
  -5   1  11    0.96    0.42 
   5   1 -11    0.20    0.35 
  -5   1  11    0.24    0.43 
  -5  -1  11    0.91    0.37 
  -5  -1  11    0.19    0.44 
   5  -1 -11    0.46    0.35 
  -5   1  10   -0.21    0.32 
  -5   1  10    0.02    0.26 
  -5   1  10   -0.03    0.39 
   5   1 -10    0.16    0.33 
  -5  -1  10   -0.25    0.32 
  -5  -1  10    0.35    0.31 
   5  -1 -10   -0.08    0.32 
  -5  -1  10    0.06    0.40 
  -5   1   9   31.24    1.20 
  -5   1   9   33.48    1.48 
  -5  -1   9   32.32    1.50 
   5  -1  -9   30.79    1.20 
  -5  -1   9   32.02    1.54 
  -5  -1   9   31.70    1.17 
  -5   1   8  232.10    5.44 
  -5   1   8  230.09    4.98 
   5   1  -8  236.43    5.01 
  -5   1   8  232.73    5.34 
  -5  -1   8  233.29    5.51 
   5  -1  -8  235.15    5.02 
  -5  -1   8  239.12    4.99 
  -5   1   7   50.06    1.66 
  -5   1   7   47.52    1.44 
   5   1  -7   47.78    1.45 
  -5  -1   7   48.04    1.44 
   5  -1  -7   48.22    1.74 
  -5  -1   7   46.83    1.69 
   5  -1  -7   47.60    1.47 
  -5   1   6  144.35    3.26 
   5   1  -6  146.69    3.28 
   5   1  -6  145.67    3.63 
  -5   1   6  147.77    3.45 
  -5  -1   6  147.74    3.26 
  -5  -1   6  149.99    3.54 
   5  -1  -6  143.41    3.28 
   5  -1  -6  146.59    3.56 
  -5   1   5   38.66    1.25 
  -5   1   5   38.61    1.18 
   5   1  -5   39.15    1.20 
   5   1  -5   37.32    1.38 
   5  -1  -5   38.61    1.34 
  -5  -1   5   38.16    1.31 
  -5  -1   5   38.28    1.17 
   5  -1  -5   38.52    1.20 
   5   1  -4    0.05    0.20 
  -5   1   4    0.66    0.22 
   5   1  -4    0.41    0.22 
  -5   1   4    0.66    0.22 
  -5  -1   4    0.71    0.23 
   5  -1  -4    0.34    0.26 
  -5  -1   4    0.39    0.19 
   5  -1  -4    0.07    0.19 
  -5   1   3  314.17    6.20 
  -5   1   3  317.10    6.17 
   5   1  -3  313.88    6.20 
  -5  -1   3  316.44    6.19 
   5  -1  -3  306.20    6.23 
   5  -1  -3  317.81    6.19 
  -5  -1   3  315.41    6.24 
  -5   1   2    6.92    0.40 
   5   1  -2    6.84    0.39 
  -5   1   2    6.81    0.39 
   5   1  -2    6.48    0.40 
   5  -1  -2    6.94    0.39 
   5  -1  -2    7.19    0.41 
  -5  -1   2    6.72    0.40 
  -5  -1   2    7.14    0.46 
   5   1  -1   80.96    1.88 
   5   1  -1   84.39    1.83 
  -5   1   1   81.11    1.91 
   5  -1  -1   81.23    1.89 
   5  -1  -1   82.44    1.78 
  -5  -1   1   83.86    1.91 
  -5  -1   1   67.29    1.75 
   5   1   0   39.48    1.02 
  -5   1   0   39.49    1.14 
   5   1   0   39.83    1.12 
  -5   1   0   39.83    0.97 
   5  -1   0   40.24    0.97 
  -5  -1   0   37.60    0.99 
   5   1   1    7.00    0.37 
   5   1   1    7.88    0.47 
  -5   1  -1    8.02    0.32 
  -5   1  -1    7.47    0.47 
  -5  -1  -1    7.75    0.47 
   5  -1   1    7.75    0.32 
  -5  -1  -1    7.44    0.36 
   5   1   2   40.68    1.23 
  -5   1  -2   40.94    1.28 
   5   1   2   40.52    1.00 
  -5  -1  -2   40.26    0.99 
  -5  -1  -2   40.76    1.24 
   5   1   3   16.42    0.75 
  -5   1  -3   16.21    0.81 
   5   1   3   16.33    0.53 
  -5  -1  -3   15.95    0.77 
  -5  -1  -3   16.53    0.53 
   5  -1   3   17.47    0.80 
   5   1   4    4.01    0.27 
   5   1   4    4.87    0.46 
  -5   1  -4    4.16    0.49 
  -5  -1  -4    3.97    0.47 
   5  -1   4    4.29    0.44 
  -5   1  -5    0.80    0.34 
   5   1   5    0.22    0.21 
   5  -1   5    0.22    0.26 
  -5  -1  -5    0.53    0.35 
  -5   1  -6    6.18    0.82 
   5   1   6    4.58    0.50 
   5  -1   6    4.99    0.53 
  -5  -1  -6    4.82    0.60 
  -5   1  -7    0.14    0.33 
   5   1   7   -0.02    0.23 
  -5  -1  -7    0.34    0.41 
  -5   1  -8   14.76    1.14 
  -5  -1  -8   12.08    1.03 
  -5   1  -9   23.80    1.51 
  -5  -1  -9   24.05    1.49 
  -5   1 -10   22.70    1.55 
  -5  -1 -10   20.83    1.47 
  -5   1 -11   12.29    1.28 
  -5  -1 -11   18.77    2.83 
  -5   1 -12   13.97    1.43 
  -5  -1 -12   16.12    1.48 
  -5   1 -13    0.63    0.67 
  -5  -1 -13    0.21    0.54 
  -5   1 -14    2.09    0.96 
  -5  -1 -14    3.64    1.09 
  -5   1 -15    7.50    1.48 
  -5  -1 -16    1.52    1.08 
  -5   2  20    1.26    0.68 
   5   2 -19    1.25    0.67 
  -5   2  19    0.30    0.62 
  -5   2  19    0.26    0.91 
  -5  -2  19    1.82    0.99 
  -5   2  18   -0.41    0.68 
   5   2 -18    1.47    0.61 
  -5   2  18    0.90    0.61 
  -5  -2  18    0.62    1.58 
   5   2 -17    4.73    0.96 
  -5   2  17    2.83    0.93 
  -5   2  17    4.81    0.87 
  -5  -2  17    3.05    0.90 
   5   2 -16   13.98    1.00 
  -5   2  16   13.93    1.42 
  -5  -2  16   16.31    1.56 
  -5   2  15   19.25    1.53 
   5   2 -15   17.82    1.08 
   5  -2 -15   17.96    1.11 
  -5  -2  15   17.60    1.54 
   5   2 -14    0.79    0.45 
  -5   2  14    1.43    0.64 
   5  -2 -14    2.94    0.64 
  -5  -2  14    2.66    0.76 
  -5   2  13   26.10    1.58 
   5   2 -13   22.86    1.15 
  -5  -2  13   21.02    1.52 
   5  -2 -13   20.85    1.14 
   5   2 -12    0.07    0.35 
  -5   2  12    0.23    0.46 
  -5  -2  12   -0.37    0.39 
   5  -2 -12    0.09    0.36 
   5   2 -11   10.77    0.76 
  -5   2  11   10.21    0.95 
   5  -2 -11   10.97    0.80 
  -5  -2  11    9.99    0.71 
  -5  -2  11    9.43    0.99 
  -5   2  10    0.83    0.39 
  -5   2  10    0.74    0.43 
   5   2 -10    0.73    0.34 
  -5   2  10    0.45    0.41 
  -5  -2  10    0.69    0.46 
  -5  -2  10    0.53    0.32 
   5  -2 -10    0.95    0.40 
  -5   2   9    5.14    0.60 
   5   2  -9    5.25    0.58 
  -5   2   9    4.89    0.71 
  -5   2   9    6.08    0.87 
  -5  -2   9    4.21    0.47 
  -5  -2   9    6.89    0.88 
  -5  -2   9    6.39    0.87 
   5  -2  -9    5.14    0.56 
   5   2  -8    6.53    0.56 
  -5   2   8    6.00    0.63 
  -5   2   8    7.12    0.69 
  -5   2   8    7.21    0.58 
  -5  -2   8    7.03    0.74 
  -5  -2   8    6.42    0.52 
  -5  -2   8    6.96    0.71 
   5   2  -7   13.55    0.73 
  -5   2   7   13.57    0.73 
  -5   2   7   13.09    0.80 
   5  -2  -7   12.86    0.74 
   5  -2  -7   12.73    0.85 
  -5  -2   7   13.61    0.70 
  -5  -2   7   13.67    0.91 
  -5  -2   7   13.44    0.88 
   5   2  -6  154.24    3.41 
  -5   2   6  150.99    3.39 
  -5   2   6  150.43    3.48 
   5   2  -6  151.51    3.79 
   5  -2  -6  149.44    3.62 
  -5  -2   6  152.61    3.37 
   5  -2  -6  151.59    3.42 
  -5  -2   6  153.90    3.67 
   5   2  -5   63.15    1.65 
  -5   2   5   57.56    1.61 
   5   2  -5   58.83    1.87 
  -5   2   5   59.54    1.63 
  -5  -2   5   59.29    1.61 
   5  -2  -5   58.58    1.74 
   5  -2  -5   60.48    1.64 
  -5  -2   5   61.47    1.79 
   5   2  -4   30.59    1.03 
   5   2  -4   31.72    1.18 
  -5   2   4   32.61    1.01 
  -5   2   4   31.26    1.02 
   5  -2  -4   33.19    1.09 
   5  -2  -4   31.61    1.04 
  -5  -2   4   31.01    1.01 
  -5  -2   4   32.92    1.11 
   5   2  -3   19.55    0.82 
  -5   2   3   20.30    0.74 
   5   2  -3   19.76    0.75 
  -5   2   3   20.05    0.72 
   5  -2  -3   18.73    0.72 
   5  -2  -3   19.92    0.75 
  -5  -2   3   19.29    0.73 
  -5  -2   3   20.39    0.77 
  -5   2   2   87.94    2.02 
   5   2  -2   88.30    2.02 
  -5   2   2   85.89    2.10 
   5   2  -2   86.08    2.05 
  -5  -2   2   86.60    2.02 
  -5  -2   2   84.78    1.99 
   5  -2  -2   87.47    2.00 
   5  -2  -2   86.19    1.98 
   5   2  -1   39.20    1.09 
   5   2  -1   39.27    1.10 
  -5   2   1   38.63    1.12 
  -5  -2   1   39.96    1.11 
   5  -2  -1   39.01    1.11 
  -5  -2   1   37.41    1.05 
   5  -2  -1   39.28    1.04 
  -5   2   0  257.13    5.35 
   5   2   0  270.72    5.32 
  -5   2   0  279.56    5.16 
   5   2   0  264.88    5.25 
   5  -2   0  257.40    5.36 
   5  -2   0  265.59    5.15 
  -5  -2   0  267.27    5.33 
   5   2   1   79.07    1.85 
  -5   2  -1   82.65    1.72 
  -5   2  -1   85.10    2.05 
   5   2   1   82.96    1.98 
   5  -2   1   80.35    2.02 
   5  -2   1   79.53    1.73 
  -5  -2  -1   83.22    1.87 
  -5  -2  -1   85.47    1.99 
   5   2   2   52.52    1.45 
  -5   2  -2   51.44    1.52 
   5   2   2   50.86    1.29 
  -5  -2  -2   53.57    1.47 
  -5  -2  -2   52.48    1.29 
   5  -2   2   54.87    1.52 
   5   2   3    1.63    0.29 
   5   2   3    2.13    0.28 
  -5   2  -3    2.56    0.44 
  -5  -2  -3    2.90    0.32 
  -5  -2  -3    2.20    0.37 
   5  -2   3    1.66    0.32 
  -5   2  -4    1.47    0.37 
   5   2   4    1.29    0.28 
   5   2   4    1.47    0.24 
  -5  -2  -4    0.93    0.29 
   5  -2   4    0.90    0.25 
  -5  -2  -4    1.71    0.27 
   5   2   5   19.31    0.88 
   5   2   5   18.85    0.65 
  -5   2  -5   17.86    1.01 
  -5  -2  -5   20.04    0.68 
  -5  -2  -5   18.87    0.96 
   5  -2   5   17.96    0.91 
   5   2   6    0.70    0.34 
   5   2   6    0.48    0.21 
  -5   2  -6    0.77    0.40 
   5  -2   6    0.51    0.24 
  -5  -2  -6    0.10    0.32 
  -5   2  -7    8.88    0.87 
   5   2   7    8.52    0.67 
   5   2   7    7.76    0.53 
   5   2   7    8.83    0.47 
  -5  -2  -7    8.86    0.83 
  -5   2  -8    2.62    0.62 
   5   2   8    3.21    0.35 
   5   2   8    4.22    0.42 
  -5  -2  -8    4.16    0.82 
  -5   2  -9   57.01    2.42 
   5   2   9   56.58    1.45 
  -5  -2  -9   59.60    2.35 
  -5   2 -10   12.66    1.20 
  -5  -2 -10   12.77    1.17 
  -5   2 -11    6.60    1.19 
  -5  -2 -11    6.60    1.11 
  -5   2 -12   15.67    1.50 
  -5  -2 -12   15.32    1.41 
  -5   2 -13   13.46    1.85 
  -5  -2 -13   12.40    1.75 
  -5   2 -14    0.73    0.68 
  -5  -2 -14    1.55    0.82 
  -5   2 -15    1.16    0.89 
  -5  -2 -15    0.12    0.82 
  -5  -2 -16   -0.61    0.79 
   5   3 -20    0.65    0.85 
  -5   3  20    1.67    0.73 
  -5   3  19   11.33    1.62 
  -5   3  19    9.44    1.05 
   5   3 -19    9.28    1.07 
   5   3 -18    7.44    0.99 
  -5   3  18    5.89    0.93 
  -5   3  18    5.79    1.16 
  -5  -3  18    6.44    1.42 
  -5   3  17    1.06    0.65 
  -5   3  17   -0.08    0.67 
  -5  -3  17   -0.52    0.62 
  -5   3  16   -0.21    0.56 
   5   3 -16    0.03    0.42 
  -5   3  16    0.26    0.49 
  -5  -3  16    0.26    0.59 
   5   3 -15    6.49    0.87 
  -5   3  15    4.98    0.80 
  -5   3  15    6.36    1.50 
  -5  -3  15    6.98    1.19 
   5   3 -14    7.29    0.76 
  -5   3  14    9.53    1.26 
  -5  -3  14    9.50    1.43 
  -5   3  13    2.83    0.70 
   5   3 -13    2.33    0.54 
   5  -3 -13    2.73    0.58 
  -5  -3  13    2.05    0.69 
   5   3 -12   22.05    1.12 
  -5   3  12   21.93    1.38 
  -5  -3  12   22.55    1.52 
   5  -3 -12   23.15    1.17 
   5   3 -11   21.34    1.06 
  -5   3  11   23.07    1.36 
  -5   3  11   22.72    1.31 
   5  -3 -11   21.54    1.10 
  -5  -3  11   20.73    1.39 
  -5  -3  11   22.69    1.04 
   5   3 -10   40.33    1.42 
  -5   3  10   37.12    1.60 
  -5   3  10   38.62    1.45 
  -5   3  10   36.35    1.66 
  -5  -3  10   39.25    1.81 
   5  -3 -10   37.11    1.43 
  -5  -3  10   38.30    1.36 
  -5   3   9    4.26    1.02 
  -5   3   9    4.65    0.65 
  -5   3   9    3.45    0.62 
   5   3  -9    3.37    0.56 
  -5  -3   9    5.30    0.80 
   5  -3  -9    4.25    0.61 
  -5  -3   9    3.46    0.68 
   5   3  -8   27.39    1.26 
  -5   3   8   26.30    1.16 
  -5   3   8   26.06    1.25 
  -5  -3   8   26.57    1.03 
   5  -3  -8   26.22    1.10 
  -5  -3   8   27.14    1.33 
  -5   3   7   72.36    2.00 
   5   3  -7   69.75    1.92 
  -5   3   7   71.14    1.95 
  -5  -3   7   68.78    1.87 
   5  -3  -7   63.88    2.07 
  -5  -3   7   66.49    2.24 
  -5  -3   7   69.89    2.21 
   5  -3  -7   72.43    1.98 
  -5   3   6   61.39    1.70 
   5   3  -6   59.34    1.70 
  -5   3   6   58.23    1.70 
   5   3  -6   61.52    2.03 
  -5  -3   6   61.42    1.67 
  -5  -3   6   60.51    1.91 
   5  -3  -6   59.24    1.72 
   5   3  -5    7.34    0.56 
  -5   3   5    8.23    0.52 
   5   3  -5    6.72    0.67 
  -5   3   5    7.64    0.57 
  -5  -3   5    8.17    0.64 
   5  -3  -5    7.90    0.58 
  -5  -3   5    8.04    0.55 
   5   3  -4    1.21    0.33 
  -5   3   4    1.54    0.34 
  -5   3   4    1.07    0.26 
   5   3  -4    0.83    0.37 
  -5  -3   4    1.52    0.33 
   5  -3  -4    0.54    0.17 
  -5  -3   4    1.22    0.34 
   5  -3  -4    1.07    0.33 
   5   3  -3    1.24    0.34 
   5   3  -3    1.75    0.32 
  -5   3   3    1.46    0.25 
  -5   3   3    1.67    0.33 
   5  -3  -3    1.65    0.35 
  -5  -3   3    1.89    0.35 
  -5  -3   3    1.81    0.29 
   5  -3  -3    1.11    0.21 
  -5   3   2   30.59    0.96 
   5   3  -2   32.29    1.02 
   5   3  -2   29.93    1.01 
  -5   3   2   33.44    0.99 
  -5  -3   2   29.81    0.97 
   5  -3  -2   28.40    0.92 
   5  -3  -2   30.70    0.97 
  -5  -3   2   32.75    0.97 
   5   3  -1   13.92    0.61 
   5   3  -1   14.48    0.65 
  -5   3   1   13.87    0.62 
   5  -3  -1   14.37    0.61 
  -5  -3   1   14.76    0.61 
   5  -3  -1   13.99    0.60 
  -5  -3   1   14.35    0.62 
  -5   3   0   87.11    2.06 
  -5   3   0   81.71    1.89 
  -5   3   0   85.46    1.88 
   5   3   0   87.99    2.00 
   5   3   0   84.24    2.00 
  -5  -3   0   85.12    1.99 
  -5  -3   0   82.93    1.97 
   5  -3   0   85.18    2.05 
   5   3   1  245.86    4.93 
  -5   3  -1  233.87    5.06 
   5   3   1  245.83    4.96 
  -5   3  -1  249.51    4.78 
  -5   3  -1  249.35    4.76 
   5  -3   1  243.78    5.06 
  -5  -3  -1  249.00    4.97 
   5   3   2   71.38    1.74 
   5   3   2   72.11    1.82 
  -5   3  -2   73.30    1.54 
  -5   3  -2   71.30    1.94 
  -5  -3  -2   72.02    1.74 
  -5  -3  -2   73.92    1.82 
   5  -3   2   70.01    1.89 
   5   3   3    1.11    0.26 
  -5   3  -3    0.43    0.29 
   5   3   3    0.81    0.28 
   5  -3   3    0.36    0.19 
  -5  -3  -3    0.58    0.27 
  -5  -3  -3    1.03    0.27 
   5   3   4   25.85    0.98 
   5   3   4   27.63    0.89 
  -5  -3  -4   28.37    1.08 
  -5  -3  -4   26.44    0.88 
   5   3   5    9.32    0.51 
   5   3   5    8.64    0.58 
  -5   3  -5    8.62    0.74 
  -5  -3  -5    8.01    0.48 
   5  -3   5    9.81    0.68 
  -5  -3  -5    9.30    0.67 
   5   3   6   10.79    0.57 
  -5   3  -6    9.78    0.85 
   5   3   6   10.57    0.78 
   5  -3   6   11.83    0.79 
  -5  -3  -6   10.71    0.56 
  -5  -3  -6   11.22    0.82 
  -5   3  -7   12.74    1.02 
   5   3   7   10.69    0.57 
   5   3   7   10.33    0.72 
   5   3   7   10.31    0.60 
  -5  -3  -7   10.97    0.88 
   5   3   8   28.27    0.99 
  -5   3  -8   27.59    1.60 
   5   3   8   26.67    0.95 
  -5  -3  -8   29.24    1.51 
   5   3   9    3.75    0.44 
   5   3   9    4.61    0.47 
  -5   3  -9    5.74    1.12 
  -5  -3  -9    4.58    0.81 
   5   3  10   24.27    0.93 
  -5   3 -10   28.86    2.29 
   5   3  10   25.96    0.95 
  -5  -3 -10   25.24    1.58 
  -5   3 -11    4.23    1.06 
   5   3  11    3.65    0.48 
   5   3  11    3.59    0.45 
  -5  -3 -11    3.83    0.89 
  -5   3 -12    2.03    0.75 
   5   3  12    3.14    0.42 
  -5  -3 -12    3.94    1.00 
  -5   3 -13    3.40    1.11 
  -5  -3 -13    2.29    0.84 
  -5   3 -14    0.74    0.81 
  -5  -3 -14    0.92    0.73 
  -5   3 -15    0.62    0.82 
  -5  -3 -15    2.25    0.96 
  -5  -3 -16   -1.20    0.83 
  -5   4  21    2.70    1.11 
  -5   4  20   -1.42    0.87 
   5   4 -19   -0.32    0.64 
  -5   4  19    0.88    0.85 
  -5   4  19    1.68    0.66 
  -5   4  18    6.33    1.26 
  -5   4  18    6.49    0.97 
   5   4 -18    7.44    1.01 
  -5  -4  18    6.41    1.48 
  -5   4  17   22.06    1.67 
  -5   4  17   22.18    1.39 
  -5  -4  17   20.02    1.81 
   5   4 -16    3.63    0.68 
  -5   4  16    3.80    0.82 
  -5   4  16    3.99    0.92 
  -5  -4  16    3.90    1.13 
  -5   4  15    0.55    0.68 
   5   4 -15    0.70    0.47 
  -5  -4  15    1.64    0.75 
  -5   4  14    0.52    0.44 
   5   4 -14    0.14    0.40 
  -5   4  14    0.76    0.55 
  -5  -4  14    0.33    0.57 
  -5   4  13   25.96    1.50 
  -5   4  13   26.20    1.36 
   5   4 -13   25.23    1.23 
  -5  -4  13   22.36    1.63 
   5   4 -12    1.00    0.44 
  -5   4  12    0.60    0.45 
  -5  -4  12    0.91    0.56 
  -5   4  11   13.98    1.03 
   5   4 -11   15.68    0.92 
  -5   4  11   14.04    1.07 
  -5  -4  11   15.30    1.07 
  -5  -4  11   14.97    1.24 
  -5   4  10    3.15    0.60 
   5   4 -10    2.66    0.49 
  -5   4  10    2.84    0.60 
  -5  -4  10    1.71    0.58 
  -5  -4  10    3.76    0.55 
  -5   4   9   -0.07    0.34 
   5   4  -9    0.07    0.30 
  -5   4   9    0.11    0.32 
  -5   4   9    0.14    0.33 
  -5  -4   9    0.41    0.40 
  -5  -4   9   -0.31    0.35 
   5  -4  -9    0.14    0.29 
  -5  -4   9    0.18    0.27 
  -5   4   8    5.72    0.58 
  -5   4   8    5.39    0.62 
   5   4  -8    5.30    0.53 
  -5   4   8    6.14    0.57 
   5  -4  -8    6.29    0.60 
  -5  -4   8    5.83    0.72 
  -5  -4   8    5.78    0.62 
  -5  -4   8    6.82    0.88 
   5   4  -7    2.43    0.48 
  -5   4   7    1.47    0.40 
  -5   4   7    1.95    0.36 
   5  -4  -7    1.78    0.41 
   5  -4  -7    1.49    0.38 
  -5  -4   7    1.79    0.37 
  -5  -4   7    1.89    0.52 
  -5   4   6   34.88    1.24 
   5   4  -6   35.46    1.23 
  -5   4   6   34.65    1.12 
  -5  -4   6   33.09    1.17 
  -5  -4   6   35.19    1.38 
   5  -4  -6   35.21    1.29 
   5  -4  -6   34.61    1.24 
   5   4  -5    2.05    0.51 
  -5   4   5    2.59    0.43 
  -5   4   5    2.62    0.34 
   5   4  -5    3.81    0.46 
  -5  -4   5    2.48    0.40 
   5  -4  -5    2.43    0.41 
  -5  -4   5    2.56    0.45 
   5  -4  -5    2.36    0.42 
  -5   4   4   18.33    0.82 
   5   4  -4   18.47    0.96 
  -5   4   4   19.98    0.72 
   5   4  -4   16.58    0.80 
  -5  -4   4   17.69    0.78 
  -5  -4   4   17.50    0.82 
   5  -4  -4   19.04    0.78 
  -5   4   3    0.42    0.19 
   5   4  -3    0.30    0.28 
  -5   4   3    0.14    0.27 
   5   4  -3    0.40    0.32 
  -5  -4   3    0.67    0.28 
  -5  -4   3    0.42    0.25 
   5  -4  -3    0.38    0.23 
   5   4  -2    7.79    0.55 
  -5   4   2    8.32    0.55 
   5   4  -2    8.67    0.57 
  -5   4   2    8.75    0.49 
  -5   4   2    9.00    0.56 
  -5  -4   2    7.87    0.47 
  -5  -4   2    7.38    0.52 
  -5   4   1    0.48    0.27 
   5   4  -1    1.04    0.28 
   5   4  -1    0.61    0.28 
  -5  -4   1    1.01    0.30 
  -5  -4   1    0.89    0.23 
  -5   4   0    7.65    0.49 
  -5   4   0    6.68    0.45 
  -5   4   0    8.11    0.47 
   5   4   0    7.62    0.53 
   5   4   0    8.19    0.46 
  -5  -4   0    7.77    0.46 
   5  -4   0    7.39    0.49 
  -5  -4   0    6.42    0.48 
  -5   4  -1   77.64    1.76 
  -5   4  -1   77.40    1.75 
   5   4   1   73.17    1.82 
   5   4   1   76.74    1.92 
  -5   4  -1   78.60    1.99 
  -5  -4  -1   78.71    1.85 
   5  -4   1   75.27    1.95 
  -5  -4  -1   77.71    1.91 
   5   4   2   58.76    1.56 
  -5   4  -2   58.75    1.34 
   5   4   2   57.86    1.51 
  -5   4  -2   54.46    1.66 
  -5   4  -2   57.03    1.33 
  -5  -4  -2   56.84    1.52 
   5  -4   2   56.96    1.63 
  -5   4  -3   19.87    0.96 
  -5   4  -3   21.39    0.60 
   5   4   3   21.55    0.83 
   5   4   3   20.22    0.80 
  -5   4  -3   20.38    0.60 
  -5  -4  -3   22.21    0.86 
  -5   4  -4    0.41    0.26 
   5   4   4   -0.05    0.21 
   5   4   4   -0.11    0.17 
  -5  -4  -4   -0.01    0.21 
   5  -4   4    0.05    0.21 
  -5  -4  -4    0.40    0.23 
   5   4   5   13.25    0.66 
   5   4   5   11.66    0.67 
  -5   4  -5   13.73    0.93 
  -5  -4  -5   10.94    0.60 
   5  -4   5   12.49    0.78 
  -5  -4  -5   12.49    0.77 
   5   4   6   11.34    0.69 
  -5   4  -6   11.64    0.94 
   5   4   6   11.62    0.65 
  -5  -4  -6   11.27    0.63 
  -5  -4  -6   10.37    0.92 
   5   4   7    6.71    0.55 
   5   4   7    8.01    0.64 
  -5   4  -7    6.20    0.83 
  -5  -4  -7    8.32    0.79 
   5   4   8   38.04    1.25 
  -5   4  -8   37.25    1.88 
   5   4   8   35.33    1.23 
  -5  -4  -8   36.86    1.69 
  -5   4  -9   69.93    2.80 
   5   4   9   72.34    1.95 
   5   4   9   71.34    1.93 
  -5  -4  -9   71.69    2.59 
   5   4  10    1.12    0.39 
  -5   4 -10    1.41    0.70 
   5   4  10    1.17    0.36 
  -5  -4 -10    1.46    0.60 
   5   4  11   50.42    1.56 
  -5   4 -11   50.30    2.53 
  -5  -4 -11   51.96    2.36 
   5   4  12    1.12    0.55 
  -5   4 -12    2.14    0.87 
   5   4  12    1.54    0.52 
  -5  -4 -12    1.41    0.66 
  -5   4 -13   -0.38    0.54 
   5   4  13    1.06    0.39 
  -5  -4 -13    0.35    0.60 
  -5  -4 -14   16.53    1.62 
  -5   4 -15   13.20    1.78 
  -5  -4 -15   13.30    1.85 
  -5  -4 -16   -0.30    0.88 
  -5   5  20    7.27    2.03 
  -5   5  20    6.36    1.03 
  -5   5  19    0.73    0.73 
   5   5 -19    1.38    0.78 
  -5   5  19    1.28    1.14 
   5   5 -18    2.42    0.74 
  -5   5  18    3.41    0.98 
  -5   5  18    0.73    0.64 
  -5  -5  18    1.47    0.92 
   5   5 -17    1.86    0.66 
  -5   5  17    0.78    0.76 
  -5   5  17    1.14    0.61 
  -5  -5  17    0.87    0.92 
   5   5 -16    3.13    0.68 
  -5   5  16    3.80    0.85 
  -5   5  16    3.88    0.88 
  -5  -5  16    3.51    0.95 
  -5   5  15   13.31    1.18 
   5   5 -15   13.09    0.97 
  -5   5  15   12.18    1.06 
  -5  -5  15   12.58    1.41 
  -5   5  14   12.62    1.30 
   5   5 -14   10.16    0.89 
  -5   5  14    9.06    1.05 
  -5  -5  14   11.47    1.31 
  -5   5  13   19.27    1.28 
   5   5 -13   18.45    1.09 
  -5   5  13   20.56    1.23 
  -5  -5  13   19.63    1.82 
  -5   5  12    7.77    0.84 
   5   5 -12    8.09    0.77 
  -5   5  12    7.86    0.85 
  -5  -5  12    9.13    1.07 
  -5   5  11    5.72    0.75 
  -5   5  11    6.14    0.73 
   5   5 -11    7.02    0.83 
  -5   5  11    7.04    0.91 
  -5  -5  11    7.99    1.14 
  -5   5  10    5.08    0.79 
  -5   5  10    4.79    0.67 
   5   5 -10    4.75    0.67 
  -5  -5  10    4.38    0.79 
  -5  -5  10    5.71    0.73 
  -5   5   9    3.68    0.65 
  -5   5   9    3.61    0.54 
  -5   5   9    4.42    0.66 
   5   5  -9    5.01    0.57 
  -5  -5   9    4.29    0.74 
  -5  -5   9    4.55    0.58 
  -5   5   8    0.30    0.26 
  -5   5   8    0.70    0.36 
   5   5  -8    1.92    0.46 
  -5   5   8    1.07    0.37 
  -5   5   8    0.61    0.32 
  -5  -5   8    0.88    0.44 
  -5  -5   8    0.52    0.40 
  -5  -5   8    0.83    0.34 
  -5   5   7    1.87    0.44 
   5   5  -7    2.20    0.48 
  -5   5   7    1.70    0.33 
  -5   5   7    1.06    0.36 
  -5  -5   7    1.71    0.52 
  -5  -5   7    1.31    0.45 
  -5   5   6  125.98    2.82 
  -5   5   6  129.97    3.13 
   5   5  -6  126.89    3.32 
  -5  -5   6  119.46    2.95 
   5  -5  -6  125.09    3.04 
  -5  -5   6  127.18    3.24 
  -5  -5   6  126.16    3.35 
  -5   5   5   40.97    1.59 
  -5   5   5   41.02    1.17 
  -5   5   5   41.96    1.38 
   5   5  -5   41.37    1.40 
  -5  -5   5   39.47    1.41 
  -5  -5   5   39.80    1.31 
   5  -5  -5   40.36    1.30 
  -5   5   4   17.11    0.84 
   5   5  -4   18.62    0.86 
  -5   5   4   18.43    0.85 
  -5   5   4   19.68    0.71 
   5   5  -4   18.11    0.96 
  -5  -5   4   18.73    0.84 
   5  -5  -4   17.75    0.75 
  -5  -5   4   18.85    0.83 
  -5   5   3    4.62    0.37 
   5   5  -3    4.67    0.53 
  -5   5   3    4.51    0.47 
   5   5  -3    4.37    0.49 
  -5   5   3    5.26    0.49 
  -5  -5   3    4.50    0.41 
   5  -5  -3    4.93    0.39 
  -5  -5   3    4.53    0.45 
  -5   5   2   28.57    1.01 
   5   5  -2   28.58    1.06 
  -5   5   2   28.48    0.91 
  -5   5   2   28.04    1.02 
   5   5  -2   28.53    1.05 
  -5  -5   2   28.14    0.91 
  -5  -5   2   28.10    1.02 
   5  -5  -2   28.27    0.90 
   5   5  -1    1.73    0.32 
  -5   5   1    2.41    0.38 
  -5   5   1    3.14    0.39 
   5   5  -1    3.14    0.45 
  -5   5   1    2.08    0.35 
  -5  -5   1    2.41    0.29 
  -5  -5   1    2.25    0.40 
   5  -5  -1    2.63    0.32 
  -5   5   0    4.04    0.39 
  -5   5   0    4.23    0.40 
  -5   5   0    3.72    0.38 
   5   5   0    3.88    0.45 
   5   5   0    3.74    0.35 
  -5  -5   0    4.58    0.36 
  -5  -5   0    4.35    0.43 
  -5   5  -1    0.40    0.22 
  -5   5  -1    0.50    0.23 
   5   5   1    0.43    0.18 
   5   5   1    0.20    0.25 
  -5   5  -1    0.76    0.24 
  -5  -5  -1    0.29    0.18 
   5  -5   1    0.49    0.22 
  -5  -5  -1    0.18    0.21 
   5   5   2   38.25    1.25 
  -5   5  -2   39.24    1.08 
  -5   5  -2   39.26    1.07 
  -5   5  -2   38.28    1.34 
   5   5   2   39.27    1.13 
   5  -5   2   39.54    1.28 
  -5  -5  -2   39.24    1.25 
  -5  -5  -2   37.90    1.14 
  -5   5  -3   18.73    0.98 
  -5   5  -3   21.28    0.66 
  -5   5  -3   19.39    0.66 
   5   5   3   21.33    0.89 
   5   5   3   21.03    0.79 
  -5  -5  -3   20.54    0.86 
  -5  -5  -3   20.25    0.81 
   5  -5   3   20.93    0.92 
   5   5   4   65.97    1.80 
  -5   5  -4   60.97    2.06 
  -5   5  -4   67.11    1.46 
   5   5   4   63.77    1.72 
   5  -5   4   61.09    1.94 
  -5  -5  -4   64.64    1.81 
  -5   5  -5   -0.13    0.30 
   5   5   5    0.24    0.22 
   5   5   5    0.43    0.27 
  -5  -5  -5    0.01    0.24 
  -5  -5  -5   -0.08    0.22 
   5  -5   5    0.04    0.28 
  -5   5  -6   31.63    1.56 
   5   5   6   29.62    1.14 
   5   5   6   31.26    1.15 
  -5  -5  -6   30.61    1.13 
  -5  -5  -6   29.75    1.52 
  -5   5  -7    1.54    0.67 
   5   5   7    1.35    0.39 
  -5  -5  -7    1.48    0.41 
  -5  -5  -7    0.58    0.43 
  -5   5  -8    9.62    1.05 
   5   5   8    9.84    0.73 
   5   5   8    9.26    0.67 
  -5  -5  -8    8.54    0.87 
  -5   5  -9   11.97    1.19 
   5   5   9   10.83    0.78 
   5   5   9   12.10    0.76 
  -5  -5  -9   13.94    1.10 
   5   5  10    0.15    0.35 
  -5   5 -10    0.12    0.50 
   5   5  10    0.10    0.35 
  -5  -5 -10    0.02    0.49 
   5   5  11    0.75    0.40 
  -5   5 -11    0.29    0.67 
   5   5  11    2.03    0.49 
  -5  -5 -11    0.62    0.63 
  -5   5 -12   34.63    2.21 
   5   5  12   37.66    1.35 
   5   5  12   30.67    1.44 
  -5  -5 -12   34.22    2.02 
   5   5  13    6.38    0.66 
  -5   5 -13    4.01    1.19 
  -5  -5 -13    4.55    1.12 
   5   5  14    1.84    0.49 
  -5   5 -14    2.23    0.87 
  -5  -5 -14    1.01    0.82 
  -5  -5 -15    4.24    1.09 
  -5  -5 -16    4.63    1.30 
  -5   6  20    2.25    1.14 
   5   6 -19    6.08    1.10 
  -5   6  18    7.21    1.12 
   5   6 -18   10.16    1.21 
  -5   6  18   11.39    1.51 
  -5  -6  18    9.14    1.99 
   5   6 -17   11.35    1.04 
  -5   6  17   11.35    1.26 
  -5   6  17   10.32    1.12 
  -5  -6  17   11.82    1.75 
  -5   6  16    2.92    0.76 
  -5   6  16    2.44    0.77 
  -5  -6  16    3.24    0.99 
  -5   6  15    0.11    0.47 
  -5   6  15   -0.19    0.54 
   5   6 -15    0.45    0.49 
  -5  -6  15    0.97    0.75 
  -5   6  14    0.77    0.55 
  -5   6  14    0.26    0.44 
   5   6 -14    0.60    0.50 
  -5  -6  14    0.64    0.68 
  -5   6  13    0.85    0.47 
  -5   6  13    1.14    0.65 
   5   6 -13    1.55    0.57 
  -5  -6  13    1.12    0.68 
  -5   6  12    2.40    0.63 
   5   6 -12    1.13    0.45 
  -5   6  12    2.22    0.57 
  -5  -6  12    1.92    0.70 
  -5   6  11   20.46    1.18 
  -5   6  11   18.62    1.08 
   5   6 -11   18.41    1.06 
  -5   6  11   18.75    1.15 
  -5  -6  11   19.74    1.42 
   5   6 -10    0.83    0.39 
  -5   6  10    0.81    0.46 
  -5   6  10    1.04    0.45 
  -5  -6  10    0.75    0.51 
   5   6  -9    4.11    0.62 
  -5   6   9    4.10    0.51 
  -5   6   9    3.11    0.57 
  -5   6   9    4.74    0.68 
  -5  -6   9    4.18    0.74 
  -5   6   8   84.75    2.13 
   5   6  -8   80.92    2.32 
  -5   6   8   82.76    2.43 
  -5   6   8   79.50    2.34 
  -5  -6   8   79.66    2.60 
  -5  -6   8   79.97    2.24 
  -5  -6   8   83.06    2.72 
   5   6  -7    2.62    0.50 
  -5   6   7    2.22    0.34 
  -5   6   7    1.95    0.46 
  -5   6   7    2.12    0.44 
  -5  -6   7    1.97    0.68 
  -5  -6   7    2.05    0.44 
  -5  -6   7    2.97    0.60 
  -5   6   6   74.79    1.81 
  -5   6   6   73.27    2.14 
   5   6  -6   74.10    2.10 
  -5   6   6   71.54    2.11 
  -5  -6   6   72.04    2.21 
  -5  -6   6   71.89    2.32 
   5  -6  -6   71.48    2.00 
  -5  -6   6   74.32    2.05 
  -5   6   5   18.15    0.92 
  -5   6   5   19.28    0.70 
  -5   6   5   19.32    0.94 
   5   6  -5   18.55    0.91 
   5  -6  -5   17.95    0.81 
  -5  -6   5   18.08    1.00 
  -5  -6   5   18.59    0.92 
  -5   6   4   42.31    1.42 
   5   6  -4   43.86    1.45 
  -5   6   4   44.17    1.20 
  -5   6   4   42.61    1.48 
   5  -6  -4   43.07    1.27 
  -5  -6   4   43.22    1.38 
  -5  -6   4   45.14    1.65 
  -5   6   3    0.13    0.25 
   5   6  -3    0.21    0.26 
  -5   6   3    0.37    0.30 
   5   6  -3    0.29    0.30 
  -5   6   3    0.46    0.19 
  -5  -6   3    0.12    0.19 
   5  -6  -3    0.33    0.19 
  -5  -6   3    0.54    0.26 
   5   6  -2   32.57    1.17 
  -5   6   2   33.45    1.17 
  -5   6   2   32.22    0.99 
  -5   6   2   33.04    1.15 
  -5  -6   2   34.04    1.01 
  -5  -6   2   32.48    1.16 
   5  -6  -2   31.91    0.99 
  -5   6   1    8.37    0.56 
   5   6  -1    8.08    0.53 
  -5   6   1    8.05    0.55 
  -5   6   1    8.65    0.50 
  -5  -6   1    7.92    0.56 
  -5  -6   1    8.69    0.46 
   5  -6  -1    8.74    0.49 
  -5   6   0   39.78    1.23 
  -5   6   0   39.69    1.24 
   5   6   0   39.56    1.17 
   5  -6   0   39.63    1.22 
  -5  -6   0   41.24    1.13 
  -5  -6   0   39.84    1.32 
  -5   6  -1    0.98    0.31 
  -5   6  -1    1.33    0.30 
  -5   6  -1    1.34    0.30 
   5   6   1    1.10    0.25 
  -5  -6  -1    1.54    0.33 
  -5  -6  -1    1.47    0.25 
  -5   6  -2   29.59    0.95 
   5   6   2   31.19    0.95 
  -5   6  -2   30.00    1.19 
  -5  -6  -2   30.92    1.13 
  -5  -6  -2   29.98    0.96 
   5  -6   2   28.17    1.07 
   5   6   3    0.02    0.16 
   5   6   3    0.02    0.26 
  -5   6  -3    0.04    0.18 
  -5  -6  -3    0.08    0.23 
  -5  -6  -3    0.01    0.19 
   5  -6   3    0.34    0.23 
   5   6   4   -0.03    0.17 
  -5   6  -4    0.08    0.18 
  -5   6  -4    0.02    0.33 
   5   6   4    0.14    0.29 
  -5  -6  -4    0.07    0.20 
   5  -6   4    0.04    0.22 
   5   6   5    6.90    0.51 
  -5   6  -5    6.96    0.78 
  -5   6  -5    7.29    0.40 
   5   6   5    6.73    0.62 
   5  -6   5    6.93    0.66 
  -5  -6  -5    5.23    0.59 
  -5  -6  -5    6.57    0.60 
  -5   6  -6    6.31    1.03 
   5   6   6    4.20    0.57 
   5   6   6    4.14    0.45 
  -5  -6  -6    4.92    0.61 
  -5  -6  -6    4.12    0.57 
   5   6   7    3.71    0.57 
  -5   6  -7    5.76    0.99 
  -5  -6  -7    3.56    0.62 
  -5  -6  -7    4.89    0.65 
   5   6   8    6.50    0.65 
   5   6   8    6.30    0.60 
  -5   6  -8    8.77    1.26 
  -5  -6  -8    7.60    0.94 
  -5   6  -9   19.82    1.97 
   5   6   9   22.59    1.07 
  -5  -6  -9   20.68    1.32 
   5   6  10    0.49    0.43 
  -5   6 -10    0.62    0.63 
  -5  -6 -10    1.09    0.57 
  -5   6 -11    0.75    0.66 
   5   6  11    1.02    0.48 
  -5  -6 -11    0.91    0.55 
   5   6  12    1.18    0.45 
  -5   6 -12    1.41    0.73 
  -5   6 -13    3.34    1.04 
   5   6  13    4.20    0.67 
  -5  -6 -13    5.21    1.04 
   5   6  14    7.51    0.84 
  -5   6 -14   10.91    1.80 
  -5  -6 -14   10.12    1.50 
  -5  -6 -15    0.71    0.94 
  -5  -6 -16   17.33    1.93 
  -5   7  20    2.71    1.29 
  -5   7  19   10.35    1.22 
  -5   7  19    9.45    2.26 
  -5   7  18    3.08    0.91 
   5   7 -18    4.04    0.92 
  -5   7  18    1.76    0.82 
  -5   7  17   11.86    1.21 
  -5   7  17   12.42    1.17 
   5   7 -17    9.72    1.08 
  -5  -7  17   13.40    1.64 
   5   7 -16   13.01    1.11 
  -5   7  16   13.80    1.20 
  -5   7  16   12.31    1.18 
  -5  -7  16   14.08    1.59 
  -5   7  15    1.28    0.63 
  -5   7  15    1.49    0.59 
  -5  -7  15    0.62    0.71 
   5   7 -14   -0.16    0.44 
  -5   7  14    0.19    0.48 
  -5   7  14    0.44    0.48 
  -5  -7  14    1.42    0.76 
  -5   7  13   39.87    1.83 
   5   7 -13   40.98    1.67 
  -5   7  13   39.72    1.68 
  -5  -7  13   40.50    2.22 
  -5   7  12   17.67    1.79 
   5   7 -12   16.82    1.08 
  -5   7  12   18.03    1.15 
  -5   7  12   19.50    1.10 
  -5  -7  12   18.55    2.08 
  -5   7  11   30.98    1.28 
   5   7 -11   27.33    1.32 
  -5   7  11   28.70    1.37 
  -5   7  11   29.42    1.48 
  -5  -7  11   26.86    1.66 
  -5   7  10   20.44    0.96 
  -5   7  10   20.33    1.22 
  -5   7  10   22.14    1.14 
   5   7 -10   19.79    1.10 
  -5  -7  10   19.03    1.36 
  -5   7   9   27.74    1.06 
  -5   7   9   25.12    1.32 
  -5   7   9   28.07    1.24 
   5   7  -9   27.66    1.26 
  -5  -7   9   26.75    1.47 
  -5   7   8   15.60    0.91 
   5   7  -8   17.35    0.99 
  -5   7   8   17.34    1.06 
  -5   7   8   16.57    0.75 
  -5  -7   8   18.48    1.18 
  -5  -7   8   18.24    1.20 
  -5   7   7    3.12    0.59 
   5   7  -7    3.78    0.59 
  -5   7   7    3.49    0.51 
  -5   7   7    4.33    0.39 
  -5  -7   7    6.35    0.86 
  -5  -7   7    3.77    0.64 
   5   7  -6    1.37    0.44 
  -5   7   6    1.27    0.45 
  -5   7   6    0.93    0.24 
   5  -7  -6    0.33    0.28 
  -5  -7   6    0.65    0.34 
  -5  -7   6    0.51    0.32 
  -5   7   5    2.30    0.28 
  -5   7   5    2.11    0.48 
   5   7  -5    3.16    0.55 
  -5   7   5    2.10    0.45 
  -5  -7   5    2.56    0.46 
   5  -7  -5    2.76    0.40 
  -5  -7   5    2.07    0.50 
  -5  -7   5    2.88    0.48 
  -5   7   4   37.38    1.39 
  -5   7   4   38.47    1.38 
  -5   7   4   38.11    1.07 
   5   7  -4   39.45    1.41 
  -5  -7   4   38.43    1.28 
  -5  -7   4   35.74    1.31 
  -5  -7   4   37.63    1.43 
   5  -7  -4   36.74    1.20 
  -5   7   3    3.39    0.52 
   5   7  -3    4.68    0.63 
  -5   7   3    4.34    0.62 
  -5   7   3    3.59    0.32 
   5  -7  -3    3.63    0.35 
  -5  -7   3    3.65    0.38 
  -5  -7   3    3.95    0.45 
   5   7  -2    5.50    0.53 
   5   7  -2    4.66    0.54 
  -5   7   2    5.30    0.38 
  -5   7   2    5.38    0.54 
  -5   7   2    5.02    0.52 
  -5  -7   2    5.65    0.52 
   5  -7  -2    6.18    0.40 
  -5  -7   2    6.14    0.41 
  -5   7   1   13.23    0.63 
   5   7  -1   12.56    0.69 
  -5   7   1   13.85    0.75 
  -5   7   1   12.85    0.71 
   5   7  -1   14.35    0.80 
   5  -7  -1   13.29    0.61 
  -5  -7   1   13.68    0.58 
  -5  -7   1   13.53    0.76 
   5   7   0   10.21    0.57 
  -5   7   0    9.47    0.61 
   5   7   0   10.26    0.70 
  -5   7   0   10.17    0.61 
  -5  -7   0   10.45    0.67 
  -5  -7   0   10.10    0.49 
   5  -7   0    9.82    0.57 
  -5   7  -1   16.93    0.85 
   5   7   1   16.67    0.69 
  -5   7  -1   17.78    0.79 
   5   7   1   17.48    0.91 
   5  -7   1   16.52    0.77 
  -5  -7  -1   17.64    0.88 
  -5  -7  -1   17.92    0.66 
   5   7   2    1.23    0.41 
  -5   7  -2    1.66    0.41 
   5   7   2    1.85    0.29 
  -5   7  -2    1.92    0.36 
  -5  -7  -2    1.81    0.28 
  -5  -7  -2    0.93    0.34 
  -5   7  -3    0.71    0.28 
   5   7   3    0.41    0.20 
   5   7   3    0.00    0.27 
  -5   7  -3    0.91    0.38 
   5  -7   3    0.99    0.34 
  -5  -7  -3    0.23    0.22 
  -5  -7  -3    0.65    0.34 
   5   7   4    7.03    0.47 
  -5   7  -4    6.29    0.47 
  -5   7  -4    7.33    0.76 
   5   7   4    7.01    0.66 
  -5  -7  -4    7.21    0.65 
   5  -7   4    6.74    0.61 
  -5  -7  -4    8.04    0.57 
   5   7   5   97.49    2.38 
  -5   7  -5   98.26    2.24 
  -5   7  -5   98.30    3.06 
   5   7   5  101.77    2.68 
  -5  -7  -5  101.40    2.59 
  -5  -7  -5   95.74    2.65 
   5   7   6    0.69    0.29 
   5   7   6    0.87    0.39 
  -5   7  -6    1.23    0.29 
  -5   7  -6    0.94    0.50 
  -5  -7  -6    0.86    0.38 
  -5   7  -7    0.65    0.54 
   5   7   7    0.04    0.35 
   5   7   7    0.11    0.25 
  -5  -7  -7    0.17    0.39 
  -5   7  -8    1.16    0.66 
   5   7   8    1.81    0.41 
   5   7   8    1.06    0.46 
  -5  -7  -8    2.16    0.58 
   5   7   9    0.68    0.42 
  -5   7  -9   -0.02    0.50 
  -5  -7  -9    0.79    0.48 
  -5   7 -10    5.62    1.20 
   5   7  10    3.10    0.60 
  -5  -7 -10    4.30    0.79 
   5   7  11    3.03    0.61 
  -5   7 -11    4.28    1.06 
  -5  -7 -11    3.40    0.82 
   5   7  12    7.37    0.80 
  -5   7 -12    5.47    1.17 
  -5  -7 -12    6.27    1.24 
  -5   7 -13    2.41    1.41 
   5   7  13    1.37    0.55 
  -5  -7 -13    2.98    0.94 
  -5   7 -14   -0.06    0.78 
   5   7  14   -0.27    0.54 
  -5  -7 -14    0.48    0.79 
  -5  -7 -15    1.55    1.05 
  -5   8  18    2.78    0.80 
   5   8 -18    1.98    0.83 
  -5   8  18    0.75    0.73 
  -5   8  17   16.52    2.32 
   5   8 -17   13.35    1.19 
  -5   8  17   15.36    1.30 
  -5  -8  17   16.25    1.79 
  -5   8  16   21.67    1.50 
   5   8 -16   20.47    1.35 
  -5  -8  16   21.02    2.57 
   5   8 -15    3.21    0.73 
  -5   8  15    3.13    0.80 
  -5   8  15    2.83    0.68 
  -5  -8  15    3.58    1.05 
  -5   8  14   34.39    1.55 
  -5   8  14   34.16    1.77 
  -5  -8  14   34.22    2.15 
  -5   8  13   12.12    0.89 
   5   8 -13   11.68    0.99 
  -5   8  13   13.52    1.16 
  -5  -8  13   11.85    1.38 
  -5   8  12   15.14    1.18 
  -5   8  12   13.23    0.95 
   5   8 -12   12.93    0.98 
  -5   8  12   12.72    0.84 
  -5  -8  12   11.48    1.27 
  -5   8  11    2.39    0.58 
  -5   8  11    2.36    0.55 
   5   8 -11    3.04    0.68 
  -5  -8  11    2.46    0.75 
  -5   8  10    2.87    0.54 
  -5   8  10    2.83    0.65 
  -5   8  10    3.29    0.46 
   5   8 -10    3.02    0.58 
  -5  -8  10    2.90    0.74 
  -5   8   9    0.02    0.40 
  -5   8   9    1.09    0.38 
   5   8  -9   -0.10    0.35 
  -5   8   9    0.10    0.23 
  -5  -8   9    0.02    0.47 
   5   8  -8    0.21    0.36 
  -5   8   8    0.41    0.23 
  -5   8   8    0.55    0.34 
  -5   8   8    0.13    0.40 
  -5  -8   8    0.17    0.40 
  -5   8   7    9.30    0.65 
  -5   8   7   10.37    0.52 
   5   8  -7   10.29    0.81 
  -5   8   7   10.47    0.87 
  -5  -8   7   10.31    0.86 
  -5   8   6   14.98    0.60 
  -5   8   6   13.09    0.93 
   5   8  -6   14.21    0.92 
  -5  -8   6   14.69    0.92 
  -5  -8   6   14.85    1.04 
  -5   8   5    2.59    0.55 
   5   8  -5    2.30    0.52 
  -5   8   5    2.15    0.29 
   5  -8  -5    2.78    0.66 
  -5  -8   5    1.75    0.42 
  -5  -8   5    2.65    0.56 
  -5   8   4    1.63    0.47 
  -5   8   4    1.65    0.26 
   5   8  -4    1.59    0.45 
  -5  -8   4    1.53    0.34 
  -5  -8   4    1.76    0.46 
  -5   8   3   17.28    0.94 
   5   8  -3   18.64    0.99 
  -5   8   3   18.68    0.68 
  -5   8   3   17.65    0.95 
  -5  -8   3   16.64    0.91 
  -5  -8   3   17.73    0.75 
   5  -8  -3   18.05    0.77 
  -5   8   2   32.60    1.26 
  -5   8   2   31.61    1.26 
  -5   8   2   32.31    1.02 
   5   8  -2   35.17    1.35 
  -5  -8   2   33.29    1.02 
   5  -8  -2   31.44    0.98 
  -5   8   1   51.61    1.65 
   5   8  -1   52.52    1.56 
  -5   8   1   50.50    1.48 
   5   8  -1   54.15    1.76 
  -5   8   1   51.19    1.63 
  -5  -8   1   53.71    1.37 
   5  -8  -1   51.69    1.42 
  -5   8   0    8.50    0.64 
   5   8   0    9.44    0.73 
  -5   8   0    9.02    0.62 
   5   8   0    9.28    0.85 
   5  -8   0    8.30    0.54 
  -5  -8   0    9.07    0.46 
  -5   8  -1   21.01    1.00 
   5   8   1   22.13    1.09 
  -5  -8  -1   21.77    0.72 
   5  -8   1   20.89    0.89 
   5   8   2    5.36    0.62 
  -5   8  -2    5.37    0.70 
  -5   8  -2    4.96    0.49 
   5  -8   2    5.31    0.52 
  -5   8  -3   34.34    1.50 
   5   8   3   33.38    1.39 
  -5   8  -3   33.97    1.16 
   5  -8   3   35.24    1.24 
  -5   8  -4   89.85    2.81 
   5   8   4   89.57    2.54 
   5   8   4   87.49    2.06 
  -5   8  -4   89.91    2.19 
  -5  -8  -4   90.65    2.23 
   5  -8   4   79.62    2.41 
   5  -8   4   90.78    2.27 
  -5   8  -5   43.39    1.30 
   5   8   5   43.24    1.64 
   5   8   5   44.92    1.30 
  -5   8  -5   43.96    1.92 
   5  -8   5   46.32    1.39 
  -5  -8  -5   43.35    1.46 
   5   8   6    0.33    0.23 
  -5   8  -6    0.27    0.27 
   5   8   6    0.15    0.38 
  -5   8  -6    0.36    0.47 
  -5  -8  -6    0.47    0.34 
   5   8   7    3.61    0.48 
   5   8   7    4.50    0.66 
  -5   8  -7    3.94    0.41 
  -5   8  -7    6.43    1.09 
  -5  -8  -7    4.22    0.64 
   5   8   8    3.07    0.48 
   5   8   8    4.38    0.67 
  -5   8  -8    4.90    0.98 
  -5  -8  -8    4.62    0.72 
  -5   8  -9   33.12    2.02 
   5   8   9   32.86    1.46 
   5   8   9   29.55    1.27 
  -5  -8  -9   31.99    1.59 
   5   8  10   13.35    0.99 
  -5   8 -10   13.73    1.44 
  -5  -8 -10   15.09    1.19 
   5   8  11    6.84    0.80 
  -5   8 -11    5.62    1.09 
  -5  -8 -11    7.25    1.07 
   5   8  12   -0.21    0.94 
  -5   8 -12    0.85    0.73 
  -5  -8 -12    2.14    0.81 
  -5   8 -13   -0.56    0.61 
   5   8  13    0.95    0.55 
  -5  -8 -13    1.23    0.84 
   5   8  14    1.07    0.66 
   5   9 -18   15.60    1.62 
   5   9 -17    6.86    1.08 
  -5   9  17    7.08    1.00 
  -5   9  17    6.69    1.18 
  -5   9  16    6.82    1.65 
  -5   9  16    7.21    0.93 
   5   9 -16    7.28    1.05 
  -5  -9  16    7.42    1.38 
  -5   9  15   34.24    1.86 
   5   9 -15   29.98    1.61 
  -5   9  15   35.08    1.54 
  -5  -9  15   34.91    2.24 
  -5   9  14   33.89    1.81 
  -5   9  14   33.84    1.44 
   5   9 -14   32.04    1.62 
  -5  -9  14   36.12    2.19 
   5   9 -13   21.32    1.31 
  -5   9  13   23.11    1.48 
  -5   9  13   22.47    1.10 
  -5   9  13   22.35    1.49 
  -5  -9  13   24.17    1.75 
  -5   9  12   37.03    1.36 
  -5   9  12   40.21    1.61 
   5   9 -12   35.85    1.68 
  -5   9  12   39.58    1.86 
  -5  -9  12   37.92    2.08 
   5   9 -11   19.47    1.19 
  -5   9  11   19.43    1.31 
  -5   9  11   21.38    1.03 
  -5   9  11   19.07    0.88 
  -5  -9  11   22.14    1.56 
  -5   9  10    2.51    0.46 
   5   9 -10    1.75    0.54 
  -5   9  10    1.09    0.53 
  -5   9  10    2.34    0.38 
  -5  -9  10    2.36    0.65 
  -5   9   9    1.29    0.56 
   5   9  -9    0.28    0.33 
  -5  -9   9    0.82    0.50 
  -5   9   8    2.18    0.58 
   5   9  -8    3.03    0.66 
  -5  -9   8    2.65    0.59 
  -5   9   7    4.75    0.75 
   5   9  -7    4.91    0.72 
  -5  -9   7    6.19    0.80 
  -5  -9   7    6.48    0.88 
   5   9  -6   10.05    0.84 
  -5   9   6   11.07    0.90 
  -5  -9   6   10.50    0.80 
  -5   9   5   12.56    0.92 
   5   9  -5   14.32    0.95 
  -5  -9   5   14.34    0.97 
  -5  -9   5   13.88    0.81 
   5   9  -4    4.59    0.65 
  -5   9   4    4.83    0.71 
  -5  -9   4    5.30    0.64 
  -5  -9   4    4.66    0.48 
   5   9  -3    7.49    0.71 
  -5   9   3    7.14    0.69 
  -5  -9   3    5.94    0.63 
   5  -9  -3    5.41    0.73 
  -5  -9   3    6.15    0.47 
   5   9  -2    0.22    0.36 
  -5   9   2    0.13    0.21 
  -5   9   2   -0.18    0.32 
   5  -9  -2    0.18    0.19 
  -5  -9   2    0.24    0.19 
  -5  -9   2    0.19    0.29 
   5   9  -1   62.31    2.04 
  -5   9   1   60.79    1.73 
  -5   9   1   64.88    1.97 
   5  -9  -1   61.86    1.62 
  -5  -9   1   63.71    1.55 
  -5   9   0   45.93    1.52 
   5   9   0   46.69    1.70 
  -5   9   0   48.38    1.60 
   5  -9   0   44.02    1.36 
  -5   9  -1   73.20    2.07 
  -5   9  -1   72.69    2.16 
   5   9   1   71.69    2.25 
   5  -9   1   69.45    1.94 
  -5   9  -2  141.78    3.35 
   5   9   2  142.10    3.64 
   5  -9   2  141.66    3.37 
   5  -9   2  142.59    3.44 
  -5   9  -3    2.83    0.48 
   5   9   3    1.90    0.52 
  -5   9  -3    2.77    0.61 
   5  -9   3    2.60    0.45 
   5  -9   3    2.03    0.53 
   5   9   4    0.48    0.43 
  -5   9  -4    0.67    0.33 
  -5   9  -4    0.55    0.42 
   5  -9   4    0.72    0.36 
  -5   9  -5    0.24    0.39 
  -5   9  -5    0.49    0.34 
   5   9   5   -0.13    0.39 
   5  -9   5    0.63    0.36 
  -5   9  -6   21.33    1.46 
  -5   9  -6   21.83    0.91 
   5   9   6   22.20    1.23 
   5  -9   6   22.38    0.96 
   5   9   7   -0.53    0.22 
  -5   9  -7   -0.05    0.26 
  -5   9  -7    0.43    0.56 
   5   9   7   -0.14    0.39 
  -5  -9  -7    0.77    0.40 
   5   9   8   24.49    1.02 
  -5   9  -8   25.81    1.99 
   5   9   8   22.87    1.28 
  -5   9  -9    2.78    0.89 
   5   9   9    2.65    0.48 
   5   9   9    1.17    0.58 
  -5  -9  -9    2.19    0.63 
   5   9  10   -0.40    0.42 
  -5   9 -10    0.12    0.59 
  -5  -9 -10    0.68    0.55 
  -5   9 -11   10.89    1.55 
   5   9  11    8.81    0.95 
  -5  -9 -11    9.33    1.13 
   5   9  12    5.84    0.86 
  -5   9 -12    7.95    2.36 
  -5  -9 -12    4.62    1.04 
  -5   9 -13    4.12    1.27 
   5   9  13    5.10    0.83 
   5   9  14    4.40    0.84 
   5  10 -17    2.42    0.96 
   5  10 -16    0.94    0.75 
  -5  10  16    3.10    0.75 
  -5 -10  16    1.75    0.92 
  -5  10  15    1.63    0.50 
   5  10 -15    0.55    0.57 
  -5  10  15    1.97    0.75 
  -5  10  14   20.14    1.47 
   5  10 -14   20.87    1.35 
  -5  10  14   21.09    1.03 
  -5 -10  14   22.01    1.78 
  -5  10  13    2.32    0.45 
  -5  10  13    2.66    0.78 
   5  10 -13    3.41    0.77 
  -5 -10  13    4.14    1.00 
   5  10 -12    1.87    0.63 
  -5  10  12    1.49    0.68 
  -5 -10  12    0.86    0.70 
   5  10 -11    6.44    0.86 
  -5  10  11    7.07    0.96 
  -5 -10  11    8.12    1.17 
  -5  10  10    2.46    0.65 
   5  10 -10    1.56    0.65 
  -5 -10  10    1.36    0.53 
  -5  10   9   13.00    1.09 
   5  10  -9   12.52    0.99 
  -5 -10   9   12.79    1.08 
  -5  10   8   15.39    1.25 
   5  10  -8   14.53    1.04 
  -5 -10   8   15.68    1.10 
   5  10  -7   21.66    1.23 
  -5  10   7   21.68    1.28 
  -5 -10   7   22.14    1.20 
  -5 -10   7   22.79    1.34 
  -5  10   6    0.03    0.33 
   5  10  -6   -0.03    0.37 
  -5 -10   6    0.78    0.42 
  -5 -10   6   -0.04    0.30 
  -5  10   5    4.05    0.64 
   5  10  -5    4.22    0.71 
  -5 -10   5    4.61    0.65 
   5  10  -4    9.49    0.85 
  -5  10   4    8.27    0.79 
  -5 -10   4    9.85    0.78 
  -5 -10   4    9.63    0.62 
   5  10  -3    0.43    0.42 
  -5  10   3    1.03    0.48 
  -5 -10   3    0.48    0.35 
  -5 -10   3    0.70    0.25 
  -5  10   2   -0.09    0.36 
   5  10  -2   -0.11    0.36 
  -5 -10   2    0.07    0.18 
  -5  10   1   47.34    1.70 
  -5  10   1   47.74    1.49 
   5  10  -1   46.21    1.77 
   5 -10  -1   46.96    1.32 
  -5  10   0    5.80    0.65 
  -5  10   0    5.50    0.59 
   5  10   0    6.04    0.72 
   5 -10   0    5.72    0.49 
  -5  10  -1   37.54    1.51 
   5  10   1   41.79    1.68 
  -5  10  -1   40.56    1.49 
   5 -10   1   39.55    1.33 
   5  10   2    6.76    0.77 
  -5  10  -2    7.53    0.65 
  -5  10  -2    6.92    0.75 
   5 -10   2    7.22    0.59 
  -5  10  -3   11.83    0.96 
   5  10   3   12.31    0.95 
  -5  10  -3   12.00    0.78 
   5 -10   3   11.34    0.77 
   5 -10   3   11.97    0.85 
  -5  10  -4    5.66    0.66 
   5  10   4    3.98    0.68 
  -5  10  -4    4.91    0.84 
   5 -10   4    4.18    0.65 
  -5  10  -5    0.16    0.56 
  -5  10  -5    1.05    0.38 
   5  10   5    0.47    0.45 
   5 -10   5    0.97    0.45 
  -5  10  -6    0.26    0.54 
  -5  10  -6    0.89    0.35 
   5  10   6    0.71    0.47 
   5 -10   6    0.45    0.42 
  -5  10  -7    4.30    0.56 
  -5  10  -7    6.87    1.09 
   5  10   7    4.28    0.85 
  -5  10  -8    1.13    0.45 
  -5  10  -8    1.10    0.63 
   5  10   8    0.76    0.54 
  -5  10  -9    1.04    0.69 
   5  10   9    0.11    0.50 
  -5  10 -10   11.96    1.69 
   5  10  10    8.38    0.95 
   5  10  11    1.87    0.61 
  -5  10 -11    4.31    1.22 
   5  10  12    4.18    0.81 
  -5  10 -12    4.50    1.28 
   5  10  13    2.30    0.76 
   5  10  14    2.51    0.83 
   5  11 -16   -0.17    0.78 
  -5  11  15    6.19    1.15 
   5  11 -15    6.07    1.00 
  -5 -11  15    8.76    1.45 
   5  11 -14    0.89    0.62 
  -5  11  14    0.85    0.56 
  -5 -11  14    1.03    0.75 
   5  11 -13   44.43    1.97 
  -5 -11  13   52.20    2.54 
   5  11 -12    0.39    0.49 
  -5  11  12    0.07    0.57 
  -5 -11  12   -0.19    0.55 
  -5  11  11   18.81    1.35 
   5  11 -11   18.03    1.25 
  -5 -11  11   19.40    1.48 
  -5  11  10   -0.02    0.51 
   5  11 -10   -0.12    0.42 
  -5 -11  10    1.25    0.52 
   5  11  -9    1.48    0.53 
  -5  11   9    1.19    0.53 
  -5 -11   9    2.48    0.65 
  -5  11   8    0.70    0.51 
   5  11  -8    1.60    0.53 
  -5 -11   8    1.49    0.54 
  -5  11   7    1.05    0.49 
  -5 -11   7    0.77    0.44 
   5  11  -6   36.63    1.71 
  -5  11   6   34.04    1.65 
  -5 -11   6   34.54    1.38 
  -5 -11   6   35.35    1.58 
  -5  11   5   36.92    1.71 
   5  11  -5   39.07    1.69 
  -5 -11   5   35.91    1.89 
  -5 -11   5   42.37    1.61 
  -5  11   4    2.34    0.60 
   5  11  -4    1.54    0.52 
  -5 -11   4    1.83    0.36 
  -5 -11   4    1.91    0.47 
   5  11  -3    3.14    0.66 
  -5  11   3    3.50    0.66 
  -5 -11   3    3.19    0.39 
  -5  11   2   14.87    1.01 
   5  11  -2   14.99    1.07 
   5  11  -1   30.62    1.48 
  -5  11   1   32.48    1.42 
   5 -11  -1   31.72    1.00 
  -5  11   0    1.10    0.40 
  -5  11   0    1.39    0.45 
   5  11   0    0.83    0.48 
   5 -11   0    0.83    0.30 
  -5  11  -1    1.13    0.45 
   5  11   1    0.92    0.49 
  -5  11  -1    0.59    0.41 
   5 -11   1    0.89    0.30 
  -5  11  -2    0.04    0.36 
   5  11   2   -0.21    0.51 
  -5  11  -2    0.13    0.40 
  -5  11  -3   53.18    2.05 
  -5  11  -3   51.29    1.74 
   5  11   3   47.63    2.43 
   5 -11   3   50.96    1.71 
   5  11   4    9.60    0.92 
  -5  11  -4   11.04    1.05 
  -5  11  -4    9.51    0.75 
   5  11   5   11.78    1.03 
  -5  11  -5   13.69    1.18 
  -5  11  -5   12.20    0.80 
  -5  11  -6    8.68    1.19 
  -5  11  -6    8.27    0.71 
   5  11   6    7.51    0.89 
   5  11   7    5.54    0.85 
  -5  11  -7    6.71    0.67 
   5  11   8    1.99    0.63 
  -5  11  -8    3.26    0.94 
  -5  11  -8    3.28    0.53 
  -5  11  -9    3.82    1.06 
   5  11   9    3.56    0.78 
   5  11  10   33.10    1.72 
  -5  11 -10   33.62    2.22 
   5  11  11   13.80    1.22 
  -5  11 -12   -0.03    0.77 
   5  11  12    0.47    0.64 
   5  11  13    2.72    0.97 
   5  11  14   18.65    1.62 
   5  12 -16    0.42    0.97 
   5  12 -15    1.45    0.84 
  -5 -12  15    2.65    1.13 
   5  12 -14    0.22    0.66 
  -5  12  14    0.28    0.71 
  -5 -12  14    0.97    1.18 
  -5  12  13    1.48    0.71 
   5  12 -13    0.76    0.59 
  -5 -12  13    0.73    0.84 
   5  12 -12    1.43    0.58 
  -5 -12  12    1.77    0.74 
  -5  12  11    9.20    1.05 
   5  12 -11    9.07    1.01 
  -5 -12  11    9.96    1.17 
  -5  12  10    5.36    0.95 
   5  12 -10    4.19    0.81 
  -5 -12  10    4.60    1.03 
   5  12  -9    0.99    0.54 
  -5  12   9    2.22    0.65 
  -5 -12   9    2.93    0.69 
   5  12  -8   12.28    1.04 
  -5  12   8   13.80    1.15 
  -5 -12   8   13.62    1.02 
   5  12  -7    6.48    0.91 
  -5  12   7    6.33    0.94 
  -5 -12   7    6.04    0.71 
   5  12  -6    1.36    0.60 
  -5  12   6    1.55    0.58 
  -5 -12   6    1.77    0.43 
  -5 -12   6    1.81    0.57 
   5  12  -5    0.94    0.52 
  -5  12   5    0.45    0.45 
  -5 -12   5    0.60    0.44 
  -5 -12   5    1.54    0.50 
  -5  12   4   27.31    1.46 
   5  12  -4   28.08    1.48 
  -5 -12   4   27.52    1.00 
  -5 -12   4   27.76    1.17 
  -5  12   3    1.76    0.62 
   5  12  -3    2.19    0.59 
   5  12  -2    1.00    0.52 
  -5  12   2    0.42    0.48 
   5  12  -1    2.01    0.60 
  -5  12   1    2.01    0.54 
  -5  12   0   28.99    1.40 
   5  12   0   32.56    1.58 
  -5  12  -1    1.26    0.45 
   5  12   1    0.36    0.45 
  -5  12  -1    0.67    0.44 
   5 -12   1    0.34    0.32 
  -5  12  -2   -0.53    0.31 
  -5  12  -2    0.35    0.42 
   5  12   2   -0.07    0.44 
   5  12   3    4.86    0.84 
  -5  12  -3    6.05    0.75 
  -5  12  -3    6.88    0.96 
   5 -12   3    4.66    0.64 
  -5  12  -4    6.59    0.71 
   5  12   4    5.85    0.83 
  -5  12  -4    7.89    0.96 
  -5  12  -5   10.21    0.81 
   5  12   5   10.79    1.02 
  -5  12  -5    8.48    1.17 
  -5  12  -6    5.71    0.67 
   5  12   6    4.74    0.83 
  -5  12  -6    6.82    1.20 
  -5  12  -7    1.88    0.81 
  -5  12  -7    2.17    0.56 
   5  12   7    0.02    0.50 
  -5  12  -8    1.51    0.78 
   5  12   8    0.17    0.58 
  -5  12  -8    1.48    0.52 
  -5  12  -9    2.68    0.67 
  -5  12  -9    5.71    1.15 
   5  12   9    4.08    0.87 
  -5  12 -10   -0.19    0.71 
   5  12  10    0.98    0.68 
  -5  12 -11    2.77    1.12 
   5  12  11    2.84    0.92 
   5  12  12   14.18    1.31 
   5  13 -15    1.61    0.93 
   5  13 -14    0.87    0.76 
  -5 -13  14    1.72    1.01 
   5  13 -13    2.41    0.77 
  -5 -13  13    2.82    0.92 
  -5  13  12    1.12    0.69 
   5  13 -12    0.22    0.58 
  -5 -13  12    2.30    0.91 
  -5  13  11    1.81    0.74 
   5  13 -11    1.25    0.59 
  -5 -13  11    1.52    0.77 
   5  13 -10    0.35    0.56 
  -5  13  10    0.36    0.66 
  -5 -13  10    0.79    0.62 
  -5  13   9    9.65    1.06 
   5  13  -9    6.90    0.95 
  -5 -13   9    9.43    0.99 
   5  13  -8   12.72    1.11 
  -5  13   8   14.76    1.25 
  -5 -13   8   14.79    1.06 
  -5  13   7    8.88    0.98 
   5  13  -7    7.18    1.06 
  -5 -13   7    8.63    0.79 
  -5  13   6    3.44    0.78 
   5  13  -6    2.30    0.66 
  -5 -13   6    4.73    0.82 
  -5 -13   6    3.12    0.53 
   5  13  -5    2.40    0.70 
  -5  13   5    2.00    0.66 
  -5 -13   5    2.92    0.62 
   5  13  -4   10.69    1.03 
  -5  13   4   11.59    1.03 
  -5  13   3   -0.26    0.41 
   5  13  -3   -0.12    0.43 
   5  13  -2    6.24    0.92 
  -5  13   2    6.11    0.85 
   5  13  -1    0.80    0.49 
  -5  13   1    0.67    0.46 
   5  13   0    2.80    0.67 
  -5  13   0    1.66    0.56 
  -5  13  -1    7.75    0.98 
   5  13   1   10.99    1.03 
  -5  13  -2    3.31    0.63 
   5  13   2    2.74    0.65 
  -5  13  -3    3.61    0.72 
  -5  13  -3    4.14    0.73 
   5  13   3    3.74    0.80 
  -5  13  -4    5.12    0.77 
   5  13   4    3.80    0.81 
  -5  13  -4    6.30    0.91 
  -5  13  -5    1.96    0.70 
   5  13   5    0.59    0.56 
  -5  13  -5   -0.02    0.43 
  -5  13  -6   16.16    1.05 
   5  13   6   17.04    1.31 
  -5  13  -6   20.29    1.79 
   5  13   7    0.68    0.55 
  -5  13  -7    0.44    0.48 
  -5  13  -7    0.89    0.72 
  -5  13  -8   16.03    1.53 
  -5  13  -8   11.21    1.01 
   5  13   8   13.29    1.27 
  -5  13  -9   13.46    1.57 
   5  13   9   17.09    1.36 
   5  13  10   16.84    1.41 
  -5  13 -11    4.15    1.21 
   5  14 -13    0.99    0.84 
  -5 -14  13    2.55    1.04 
   5  14 -12    2.33    0.82 
  -5 -14  12    3.43    1.06 
  -5 -14  11   -0.10    0.71 
  -5  14  10    0.43    0.64 
   5  14 -10    0.66    0.60 
  -5 -14  10    1.71    0.69 
   5  14  -9    0.63    0.61 
  -5  14   9    0.46    0.53 
  -5 -14   9    0.40    0.56 
   5  14  -8    7.90    1.20 
  -5 -14   8    7.17    0.87 
  -5  14   7    1.75    0.66 
   5  14  -7    2.77    0.76 
  -5 -14   7    3.48    0.61 
  -5  14   6   -0.29    0.50 
   5  14  -6    0.95    0.56 
  -5 -14   6    0.50    0.36 
   5  14  -5    5.62    0.93 
  -5  14   5    6.31    0.96 
   5  14  -4   -0.58    0.42 
  -5  14   4    0.19    0.45 
  -5  14   3   -0.20    0.43 
   5  14  -3    0.31    0.53 
   5  14  -2   -0.06    0.46 
  -5  14   2    0.25    0.49 
   5  14  -1   -0.70    0.41 
  -5  14   1    0.76    0.51 
   5  14   0    0.72    0.59 
  -5  14   0    1.49    0.58 
   5  14   1    0.04    0.55 
  -5  14  -1    0.15    0.47 
  -5  14  -2    5.81    0.84 
   5  14   2    6.57    1.05 
  -5  14  -3    5.19    0.85 
  -5  14  -3    5.33    0.84 
   5  14   3    4.33    0.85 
  -5  14  -4    1.24    0.64 
  -5  14  -4    1.88    0.59 
   5  14   4    0.80    0.63 
  -5  14  -5   11.93    1.25 
  -5  14  -5   10.15    0.98 
   5  14   5   13.02    1.29 
  -5  14  -6   11.56    1.04 
   5  14   6    9.51    1.40 
  -5  14  -6   12.88    1.35 
  -5  14  -7   -0.21    0.69 
   5  14   7    0.27    0.64 
  -5  14  -7   -0.31    0.59 
  -5  14  -8    9.35    1.36 
   5  14   8    6.47    1.03 
  -5  14  -9    2.89    0.98 
  -5 -15  13   11.08    1.81 
  -5 -15  12    0.82    1.06 
   5  15 -11    2.97    0.96 
  -5 -15  11    4.97    1.15 
   5  15 -10   14.08    1.37 
  -5 -15  10   17.21    1.47 
   5  15  -9    0.04    0.60 
  -5  15   8    2.73    0.78 
  -5 -15   8    3.72    0.83 
  -5  15   7    0.28    0.57 
  -5 -15   7   -0.44    0.54 
  -5  15   6   -0.31    0.47 
   5  15  -6    0.70    1.02 
  -5  15   5    0.91    0.82 
   5  15  -5    1.37    0.66 
  -5  15   4   11.69    1.15 
   5  15  -4   12.39    1.18 
  -5  15   3    0.14    0.52 
   5  15  -3    0.53    0.53
[truncated: 547,746 more chars]
