# Supplementary material for: Synthesis, Characterization and DFT Study of a New Family of High-Energy Compounds Based on s-Triazine, Carborane and Tetrazoles
Source: Molecules. 2022 Nov 2;27(21):7484. doi: 10.3390/molecules27217484 (PMC9656522; doi:10.3390/molecules27217484)
Supplement: Supplementary file 1 [file molecules-27-07484-s001.zip › Compound_19.cif]

 
data_abb 
  
_audit_creation_method            'SHELXL-2014/7' 
_shelx_SHELXL_version_number      '2014/7' 
_chemical_name_systematic         ? 
_chemical_name_common             ? 
_chemical_melting_point           ? 
_chemical_formula_moiety          
 'C19 H22 B10 N8, 2(C H4 O)' 
_chemical_formula_sum 
 'C21 H30 B10 N8 O2' 
_chemical_formula_weight          534.63 
  
loop_ 
 _atom_type_symbol 
 _atom_type_description 
 _atom_type_scat_dispersion_real 
 _atom_type_scat_dispersion_imag 
 _atom_type_scat_source 
 'C'  'C'   0.0033   0.0016 
 'International Tables Vol C Tables 4.2.6.8 and 6.1.1.4' 
 'H'  'H'   0.0000   0.0000 
 'International Tables Vol C Tables 4.2.6.8 and 6.1.1.4' 
 'B'  'B'   0.0013   0.0007 
 'International Tables Vol C Tables 4.2.6.8 and 6.1.1.4' 
 'N'  'N'   0.0061   0.0033 
 'International Tables Vol C Tables 4.2.6.8 and 6.1.1.4' 
 'O'  'O'   0.0106   0.0060 
 'International Tables Vol C Tables 4.2.6.8 and 6.1.1.4' 
  
_space_group_crystal_system       orthorhombic 
_space_group_IT_number            41 
_space_group_name_H-M_alt         'A b a 2' 
_space_group_name_Hall            'A 2 -2ac' 
  
_shelx_space_group_comment 
; 
The symmetry employed for this shelxl refinement is uniquely defined 
by the following loop, which should always be used as a source of 
symmetry information in preference to the above space-group names. 
They are only intended as comments. 
; 
  
loop_ 
 _space_group_symop_operation_xyz 
 'x, y, z' 
 '-x, -y, z' 
 'x+1/2, -y+1/2, z' 
 '-x+1/2, y+1/2, z' 
 'x, y+1/2, z+1/2' 
 '-x, -y+1/2, z+1/2' 
 'x+1/2, -y+1, z+1/2' 
 '-x+1/2, y+1, z+1/2' 
  
_cell_length_a                    26.624(2) 
_cell_length_b                    28.969(2) 
_cell_length_c                    7.2719(6) 
_cell_angle_alpha                 90 
_cell_angle_beta                  90 
_cell_angle_gamma                 90 
_cell_volume                      5608.4(8) 
_cell_formula_units_Z             8 
_cell_measurement_temperature     120(2) 
_cell_measurement_reflns_used     7265 
_cell_measurement_theta_min       2.69 
_cell_measurement_theta_max       29.39 
  
_exptl_crystal_description        needle 
_exptl_crystal_colour             colourless 
_exptl_crystal_density_meas       ? 
_exptl_crystal_density_method     ? 
_exptl_crystal_density_diffrn     1.266 
_exptl_crystal_F_000              2224 
_exptl_transmission_factor_min    ? 
_exptl_transmission_factor_max    ? 
_exptl_crystal_size_max           0.550 
_exptl_crystal_size_mid           0.100 
_exptl_crystal_size_min           0.050 
_exptl_absorpt_coefficient_mu     0.078 
_shelx_estimated_absorpt_T_min    0.958 
_shelx_estimated_absorpt_T_max    0.996 
_exptl_absorpt_correction_type    multi-scan
_exptl_absorpt_correction_T_min   0.865 
_exptl_absorpt_correction_T_max   0.996  
_exptl_absorpt_process_details    SADABS 
_exptl_absorpt_special_details    ? 
_diffrn_ambient_temperature       120(2) 
_diffrn_radiation_wavelength      0.71073 
_diffrn_radiation_type            MoK\a 
_diffrn_source                    ? 
_diffrn_measurement_device_type   'Bruker APEX-II CCD' 
_diffrn_measurement_method        '\f and \w scans' 
_diffrn_detector_area_resol_mean  ? 
_diffrn_reflns_number             38136 
_diffrn_reflns_av_unetI/netI      0.0452 
_diffrn_reflns_av_R_equivalents   0.0630 
_diffrn_reflns_limit_h_min        -35 
_diffrn_reflns_limit_h_max        35 
_diffrn_reflns_limit_k_min        -38 
_diffrn_reflns_limit_k_max        38 
_diffrn_reflns_limit_l_min        -9 
_diffrn_reflns_limit_l_max        9 
_diffrn_reflns_theta_min          2.078 
_diffrn_reflns_theta_max          27.998 
_diffrn_reflns_theta_full         25.242 
_diffrn_measured_fraction_theta_max   0.999 
_diffrn_measured_fraction_theta_full  0.999 
_diffrn_reflns_Laue_measured_fraction_max    0.999 
_diffrn_reflns_Laue_measured_fraction_full   0.999 
_diffrn_reflns_point_group_measured_fraction_max   0.999 
_diffrn_reflns_point_group_measured_fraction_full  0.999 
_reflns_number_total              6771 
_reflns_number_gt                 5735 
_reflns_threshold_expression      'I > 2\s(I)' 
_reflns_Friedel_coverage          0.853 
_reflns_Friedel_fraction_max      0.999 
_reflns_Friedel_fraction_full     1.000 
  
_reflns_special_details 
; 
 Reflections were merged by SHELXL according to the crystal 
 class for the calculation of statistics and refinement. 
  
 _reflns_Friedel_fraction is defined as the number of unique 
 Friedel pairs measured divided by the number that would be 
 possible theoretically, ignoring centric projections and 
 systematic absences. 
; 
  
_computing_data_collection        'Bruker APEX2' 
_computing_cell_refinement        'Bruker SAINT' 
_computing_data_reduction         'Bruker SAINT' 
_computing_structure_solution     'SHELXS-97 (Sheldrick 2008)' 
_computing_structure_refinement 'SHELXL-2014/7 (Sheldrick, 2014)' 
_computing_molecular_graphics     'Bruker SHELXTL' 
_computing_publication_material   'Bruker SHELXTL' 
_refine_special_details           ? 
_refine_ls_structure_factor_coef  Fsqd 
_refine_ls_matrix_type            full 
_refine_ls_weighting_scheme       calc 
_refine_ls_weighting_details 
'w=1/[\s^2^(Fo^2^)+(0.0429P)^2^+3.0828P] where P=(Fo^2^+2Fc^2^)/3' 
_atom_sites_solution_primary      ? 
_atom_sites_solution_secondary    ? 
_atom_sites_solution_hydrogens    mixed 
_refine_ls_hydrogen_treatment     mixed 
_refine_ls_extinction_method      none 
_refine_ls_extinction_coef        . 
_refine_ls_number_reflns          6771 
_refine_ls_number_parameters      428 
_refine_ls_number_restraints      1 
_refine_ls_R_factor_all           0.0608 
_refine_ls_R_factor_gt            0.0457 
_refine_ls_wR_factor_ref          0.1046 
_refine_ls_wR_factor_gt           0.0971 
_refine_ls_goodness_of_fit_ref    1.075 
_refine_ls_restrained_S_all       1.075 
_refine_ls_shift/su_max           0.000 
_refine_ls_shift/su_mean          0.000 
  
loop_ 
 _atom_site_label 
 _atom_site_type_symbol 
 _atom_site_fract_x 
 _atom_site_fract_y 
 _atom_site_fract_z 
 _atom_site_U_iso_or_equiv 
 _atom_site_adp_type 
 _atom_site_occupancy 
 _atom_site_site_symmetry_order 
 _atom_site_calc_flag 
 _atom_site_refinement_flags_posn 
 _atom_site_refinement_flags_adp 
 _atom_site_refinement_flags_occupancy 
 _atom_site_disorder_assembly 
 _atom_site_disorder_group 
N1 N 0.13537(9) 0.08967(8) 0.5437(3) 0.0198(5) Uani 1 1 d . . . . . 
H1N H 0.1093(14) 0.0984(12) 0.502(5) 0.034(10) Uiso 1 1 d . . . . . 
N2 N 0.16625(8) 0.15935(8) 0.4287(3) 0.0177(5) Uani 1 1 d . . . . . 
N3 N 0.25109(9) 0.17779(7) 0.4286(3) 0.0179(4) Uani 1 1 d . . . . . 
N4 N 0.22177(8) 0.10374(8) 0.5445(3) 0.0196(5) Uani 1 1 d . . . . . 
N5 N 0.12053(8) 0.17637(7) 0.3719(3) 0.0186(5) Uani 1 1 d . . . . . 
N6 N 0.18440(8) 0.22674(8) 0.3012(3) 0.0183(5) Uani 1 1 d . . . . . 
N7 N 0.30788(8) 0.12505(8) 0.5071(3) 0.0206(5) Uani 1 1 d . . . . . 
N8 N 0.33209(9) 0.16462(8) 0.4421(3) 0.0201(5) Uani 1 1 d . . . . . 
C1 C 0.18283(11) 0.02252(10) 0.7622(4) 0.0219(6) Uani 1 1 d . . . . . 
C2 C 0.12794(11) 0.03269(10) 0.8525(4) 0.0227(6) Uani 1 1 d . . . . . 
C3 C 0.17531(10) 0.11626(9) 0.5084(4) 0.0184(5) Uani 1 1 d . . . . . 
C4 C 0.20263(10) 0.19041(9) 0.3838(4) 0.0167(5) Uani 1 1 d . . . . . 
C5 C 0.25922(10) 0.13347(9) 0.4980(4) 0.0181(5) Uani 1 1 d . . . . . 
C6 C 0.13350(10) 0.21642(9) 0.2969(4) 0.0177(5) Uani 1 1 d . . . . . 
C7 C 0.09737(10) 0.24826(9) 0.2120(4) 0.0185(5) Uani 1 1 d . . . . . 
C8 C 0.04903(11) 0.23310(10) 0.1668(4) 0.0223(6) Uani 1 1 d . . . . . 
H8A H 0.0390 0.2024 0.1941 0.027 Uiso 1 1 calc R U . . . 
C9 C 0.01576(12) 0.26316(10) 0.0820(4) 0.0269(7) Uani 1 1 d . . . . . 
H9A H -0.0171 0.2529 0.0514 0.032 Uiso 1 1 calc R U . . . 
C10 C 0.03014(11) 0.30806(10) 0.0415(4) 0.0265(6) Uani 1 1 d . . . . . 
H10A H 0.0073 0.3283 -0.0183 0.032 Uiso 1 1 calc R U . . . 
C11 C 0.07783(12) 0.32338(10) 0.0881(4) 0.0259(6) Uani 1 1 d . . . . . 
H11A H 0.0874 0.3543 0.0623 0.031 Uiso 1 1 calc R U . . . 
C12 C 0.11168(11) 0.29358(9) 0.1727(4) 0.0231(6) Uani 1 1 d . . . . . 
H12A H 0.1444 0.3040 0.2035 0.028 Uiso 1 1 calc R U . . . 
C13 C 0.29878(10) 0.19611(9) 0.3964(4) 0.0189(6) Uani 1 1 d . . . . . 
C14 C 0.30980(11) 0.24334(9) 0.3347(4) 0.0212(6) Uani 1 1 d . . . . . 
C15 C 0.27945(11) 0.28045(10) 0.3847(4) 0.0260(6) Uani 1 1 d . . . . . 
H15A H 0.2504 0.2754 0.4579 0.031 Uiso 1 1 calc R U . . . 
C16 C 0.29168(13) 0.32469(11) 0.3278(5) 0.0339(8) Uani 1 1 d . . . . . 
H16A H 0.2709 0.3500 0.3613 0.041 Uiso 1 1 calc R U . . . 
C17 C 0.33428(15) 0.33214(12) 0.2219(5) 0.0408(9) Uani 1 1 d . . . . . 
H17A H 0.3422 0.3624 0.1812 0.049 Uiso 1 1 calc R U . . . 
C18 C 0.36524(14) 0.29558(12) 0.1755(5) 0.0392(9) Uani 1 1 d . . . . . 
H18A H 0.3947 0.3009 0.1046 0.047 Uiso 1 1 calc R U . . . 
C19 C 0.35337(13) 0.25125(11) 0.2323(4) 0.0295(7) Uani 1 1 d . . . . . 
H19A H 0.3749 0.2262 0.2017 0.035 Uiso 1 1 calc R U . . . 
B3 B 0.13638(12) 0.04232(11) 0.6167(4) 0.0183(6) Uani 1 1 d . . . . . 
B4 B 0.17820(12) -0.00260(11) 0.5506(5) 0.0218(7) Uani 1 1 d . . . . . 
B5 B 0.19454(14) -0.03510(12) 0.7497(6) 0.0282(8) Uani 1 1 d . . . . . 
B6 B 0.16313(15) -0.01111(12) 0.9447(5) 0.0290(8) Uani 1 1 d . . . . . 
B7 B 0.08099(12) 0.01619(11) 0.7078(5) 0.0215(6) Uani 1 1 d . . . . . 
B8 B 0.11237(12) -0.00838(11) 0.5136(5) 0.0210(6) Uani 1 1 d . . . . . 
B9 B 0.14816(14) -0.05651(12) 0.5956(5) 0.0260(7) Uani 1 1 d . . . . . 
B10 B 0.13908(14) -0.06148(12) 0.8369(5) 0.0289(8) Uani 1 1 d . . . . . 
B11 B 0.09726(14) -0.01676(12) 0.9074(5) 0.0270(7) Uani 1 1 d . . . . . 
B12 B 0.08799(12) -0.04472(11) 0.6919(5) 0.0247(7) Uani 1 1 d . . . . . 
H1 H 0.2074(13) 0.0450(11) 0.791(5) 0.032(9) Uiso 1 1 d . . . . . 
H2 H 0.1255(13) 0.0612(12) 0.916(6) 0.039(10) Uiso 1 1 d . . . . . 
H4 H 0.2052(11) 0.0058(10) 0.452(4) 0.021(8) Uiso 1 1 d . . . . . 
H5 H 0.2326(13) -0.0472(11) 0.765(5) 0.039(10) Uiso 1 1 d . . . . . 
H6 H 0.1813(13) -0.0054(12) 1.068(5) 0.031(9) Uiso 1 1 d . . . . . 
H7 H 0.0482(12) 0.0382(11) 0.702(5) 0.029(8) Uiso 1 1 d . . . . . 
H8 H 0.0973(11) -0.0056(10) 0.380(5) 0.022(8) Uiso 1 1 d . . . . . 
H9 H 0.1547(12) -0.0863(11) 0.508(5) 0.032(9) Uiso 1 1 d . . . . . 
H10 H 0.1394(14) -0.0952(13) 0.900(5) 0.046(11) Uiso 1 1 d . . . . . 
H11 H 0.0741(12) -0.0169(11) 1.020(5) 0.026(8) Uiso 1 1 d . . . . . 
H12 H 0.0548(12) -0.0675(10) 0.667(5) 0.028(8) Uiso 1 1 d . . . . . 
O1S O 0.45773(8) 0.10147(7) 0.8444(3) 0.0278(5) Uani 1 1 d . . . . . 
H1S H 0.4456(16) 0.1119(15) 0.744(7) 0.058(14) Uiso 1 1 d . . . . . 
C1S C 0.49421(12) 0.06808(12) 0.7928(5) 0.0352(8) Uani 1 1 d . . . . . 
H1SA H 0.4997 0.0466 0.8950 0.053 Uiso 1 1 calc R U . . . 
H1SB H 0.5259 0.0836 0.7628 0.053 Uiso 1 1 calc R U . . . 
H1SC H 0.4823 0.0510 0.6851 0.053 Uiso 1 1 calc R U . . . 
O2S O 0.42806(8) 0.12596(8) 0.4941(3) 0.0273(5) Uani 1 1 d . . . . . 
H2S H 0.4046(16) 0.1426(14) 0.482(6) 0.055(14) Uiso 1 1 d . . . . . 
C2S C 0.46487(12) 0.13921(12) 0.3615(5) 0.0352(8) Uani 1 1 d . . . . . 
H2SA H 0.4956 0.1213 0.3810 0.053 Uiso 1 1 calc R U . . . 
H2SB H 0.4723 0.1722 0.3750 0.053 Uiso 1 1 calc R U . . . 
H2SC H 0.4519 0.1333 0.2376 0.053 Uiso 1 1 calc R U . . . 
  
loop_ 
 _atom_site_aniso_label 
 _atom_site_aniso_U_11 
 _atom_site_aniso_U_22 
 _atom_site_aniso_U_33 
 _atom_site_aniso_U_23 
 _atom_site_aniso_U_13 
 _atom_site_aniso_U_12 
N1 0.0153(12) 0.0199(11) 0.0242(13) 0.0041(10) -0.0004(10) -0.0002(9) 
N2 0.0159(11) 0.0173(11) 0.0200(11) 0.0012(9) -0.0003(9) 0.0000(9) 
N3 0.0174(11) 0.0184(10) 0.0181(10) 0.0011(10) -0.0005(9) -0.0009(10) 
N4 0.0176(11) 0.0197(11) 0.0215(12) 0.0023(10) 0.0002(9) -0.0004(9) 
N5 0.0166(11) 0.0198(11) 0.0194(11) 0.0006(10) -0.0008(9) 0.0019(9) 
N6 0.0179(12) 0.0192(11) 0.0179(11) -0.0012(9) -0.0001(9) -0.0003(9) 
N7 0.0190(11) 0.0206(12) 0.0224(12) -0.0016(10) 0.0000(10) -0.0017(9) 
N8 0.0199(12) 0.0211(12) 0.0193(12) -0.0027(10) 0.0006(9) -0.0026(9) 
C1 0.0211(15) 0.0184(13) 0.0264(15) 0.0011(12) -0.0040(11) -0.0018(11) 
C2 0.0276(16) 0.0220(14) 0.0185(14) -0.0004(12) 0.0034(12) -0.0021(11) 
C3 0.0218(13) 0.0188(13) 0.0146(12) -0.0005(11) -0.0005(11) -0.0002(10) 
C4 0.0186(13) 0.0182(12) 0.0134(12) -0.0016(10) 0.0012(10) -0.0012(10) 
C5 0.0215(14) 0.0191(12) 0.0138(12) -0.0012(11) -0.0001(11) 0.0002(10) 
C6 0.0191(14) 0.0198(13) 0.0142(12) -0.0031(10) 0.0006(10) -0.0012(10) 
C7 0.0204(13) 0.0202(13) 0.0148(13) -0.0002(11) 0.0014(10) 0.0026(10) 
C8 0.0231(14) 0.0217(14) 0.0222(14) 0.0018(12) 0.0015(12) 0.0007(11) 
C9 0.0205(15) 0.0311(16) 0.0290(16) -0.0002(13) -0.0019(12) 0.0032(12) 
C10 0.0289(16) 0.0273(15) 0.0232(15) 0.0007(13) -0.0013(12) 0.0101(12) 
C11 0.0331(17) 0.0187(14) 0.0260(15) 0.0015(12) 0.0018(12) 0.0032(12) 
C12 0.0232(14) 0.0215(14) 0.0247(14) -0.0019(12) 0.0002(12) -0.0001(11) 
C13 0.0185(14) 0.0229(13) 0.0152(13) -0.0031(11) -0.0003(10) -0.0036(11) 
C14 0.0251(15) 0.0239(14) 0.0144(13) 0.0000(11) -0.0037(11) -0.0067(11) 
C15 0.0275(16) 0.0252(14) 0.0254(16) 0.0002(12) -0.0053(13) -0.0046(12) 
C16 0.043(2) 0.0245(15) 0.0338(18) 0.0024(14) -0.0107(15) -0.0042(13) 
C17 0.067(3) 0.0276(17) 0.0279(18) 0.0075(14) -0.0077(17) -0.0197(17) 
C18 0.052(2) 0.044(2) 0.0215(16) -0.0023(15) 0.0078(16) -0.0265(16) 
C19 0.0339(17) 0.0356(17) 0.0189(14) -0.0063(13) 0.0018(12) -0.0118(14) 
B3 0.0168(15) 0.0207(15) 0.0175(15) -0.0003(12) -0.0007(11) -0.0008(12) 
B4 0.0200(16) 0.0207(15) 0.0246(17) -0.0020(13) 0.0019(13) -0.0003(12) 
B5 0.0235(18) 0.0209(16) 0.040(2) 0.0017(15) -0.0058(15) 0.0006(13) 
B6 0.037(2) 0.0261(17) 0.0243(17) 0.0051(15) -0.0074(15) -0.0041(15) 
B7 0.0208(16) 0.0202(15) 0.0236(17) 0.0025(13) 0.0031(13) -0.0030(12) 
B8 0.0219(16) 0.0219(15) 0.0190(16) -0.0011(13) -0.0003(13) -0.0020(12) 
B9 0.0261(18) 0.0197(16) 0.0321(18) -0.0026(14) -0.0018(14) -0.0003(13) 
B10 0.0318(19) 0.0220(16) 0.0329(19) 0.0066(15) -0.0051(15) -0.0024(13) 
B11 0.033(2) 0.0248(16) 0.0234(18) 0.0047(14) 0.0033(15) -0.0048(14) 
B12 0.0231(17) 0.0191(15) 0.0319(18) 0.0023(14) -0.0002(15) -0.0022(12) 
O1S 0.0234(11) 0.0292(11) 0.0308(12) 0.0013(10) 0.0016(9) 0.0065(8) 
C1S 0.0275(17) 0.0375(18) 0.041(2) -0.0011(15) -0.0015(14) 0.0094(14) 
O2S 0.0205(11) 0.0300(12) 0.0314(12) 0.0019(10) 0.0021(9) 0.0011(9) 
C2S 0.0298(17) 0.0419(18) 0.0339(18) -0.0057(16) 0.0067(15) -0.0076(14) 
  
_geom_special_details 
; 
 All esds (except the esd in the dihedral angle between two l.s. planes) 
 are estimated using the full covariance matrix.  The cell esds are taken 
 into account individually in the estimation of esds in distances, angles 
 and torsion angles; correlations between esds in cell parameters are only 
 used when they are defined by crystal symmetry.  An approximate (isotropic) 
 treatment of cell esds is used for estimating esds involving l.s. planes. 
; 
  
loop_ 
 _geom_bond_atom_site_label_1 
 _geom_bond_atom_site_label_2 
 _geom_bond_distance 
 _geom_bond_site_symmetry_2 
 _geom_bond_publ_flag 
N1 C3 1.338(3) . ? 
N1 B3 1.471(4) . ? 
N1 H1N 0.80(4) . ? 
N2 C4 1.361(3) . ? 
N2 N5 1.377(3) . ? 
N2 C3 1.397(3) . ? 
N3 C4 1.380(3) . ? 
N3 C13 1.396(3) . ? 
N3 C5 1.397(3) . ? 
N4 C3 1.315(3) . ? 
N4 C5 1.360(3) . ? 
N5 C6 1.328(4) . ? 
N6 C4 1.305(3) . ? 
N6 C6 1.388(4) . ? 
N7 C5 1.320(3) . ? 
N7 N8 1.397(3) . ? 
N8 C13 1.315(4) . ? 
C1 C2 1.629(4) . ? 
C1 B5 1.700(4) . ? 
C1 B4 1.707(5) . ? 
C1 B3 1.725(4) . ? 
C1 B6 1.728(5) . ? 
C1 H1 0.94(3) . ? 
C2 B11 1.697(4) . ? 
C2 B7 1.702(4) . ? 
C2 B6 1.714(5) . ? 
C2 B3 1.751(4) . ? 
C2 H2 0.95(4) . ? 
C6 C7 1.469(4) . ? 
C7 C12 1.397(4) . ? 
C7 C8 1.399(4) . ? 
C8 C9 1.387(4) . ? 
C8 H8A 0.9500 . ? 
C9 C10 1.387(4) . ? 
C9 H9A 0.9500 . ? 
C10 C11 1.387(4) . ? 
C10 H10A 0.9500 . ? 
C11 C12 1.391(4) . ? 
C11 H11A 0.9500 . ? 
C12 H12A 0.9500 . ? 
C13 C14 1.469(4) . ? 
C14 C15 1.393(4) . ? 
C14 C19 1.397(4) . ? 
C15 C16 1.386(4) . ? 
C15 H15A 0.9500 . ? 
C16 C17 1.388(5) . ? 
C16 H16A 0.9500 . ? 
C17 C18 1.384(5) . ? 
C17 H17A 0.9500 . ? 
C18 C19 1.386(5) . ? 
C18 H18A 0.9500 . ? 
C19 H19A 0.9500 . ? 
B3 B8 1.769(4) . ? 
B3 B4 1.779(5) . ? 
B3 B7 1.785(4) . ? 
B4 B5 1.781(5) . ? 
B4 B8 1.781(4) . ? 
B4 B9 1.785(5) . ? 
B4 H4 1.04(3) . ? 
B5 B9 1.779(5) . ? 
B5 B10 1.780(5) . ? 
B5 B6 1.787(6) . ? 
B5 H5 1.08(3) . ? 
B6 B10 1.776(5) . ? 
B6 B11 1.782(5) . ? 
B6 H6 1.03(4) . ? 
B7 B12 1.778(5) . ? 
B7 B8 1.789(5) . ? 
B7 B11 1.791(5) . ? 
B7 H7 1.08(3) . ? 
B8 B9 1.791(5) . ? 
B8 B12 1.792(5) . ? 
B8 H8 1.05(3) . ? 
B9 B10 1.777(5) . ? 
B9 B12 1.781(5) . ? 
B9 H9 1.09(3) . ? 
B10 B11 1.783(5) . ? 
B10 B12 1.788(5) . ? 
B10 H10 1.08(4) . ? 
B11 B12 1.781(5) . ? 
B11 H11 1.03(3) . ? 
B12 H12 1.12(3) . ? 
O1S C1S 1.421(4) . ? 
O1S H1S 0.85(5) . ? 
C1S H1SA 0.9800 . ? 
C1S H1SB 0.9800 . ? 
C1S H1SC 0.9800 . ? 
O2S C2S 1.427(4) . ? 
O2S H2S 0.79(4) . ? 
C2S H2SA 0.9800 . ? 
C2S H2SB 0.9800 . ? 
C2S H2SC 0.9800 . ? 
  
loop_ 
 _geom_angle_atom_site_label_1 
 _geom_angle_atom_site_label_2 
 _geom_angle_atom_site_label_3 
 _geom_angle 
 _geom_angle_site_symmetry_1 
 _geom_angle_site_symmetry_3 
 _geom_angle_publ_flag 
C3 N1 B3 126.3(2) . . ? 
C3 N1 H1N 116(3) . . ? 
B3 N1 H1N 117(3) . . ? 
C4 N2 N5 108.7(2) . . ? 
C4 N2 C3 124.5(2) . . ? 
N5 N2 C3 126.6(2) . . ? 
C4 N3 C13 135.2(2) . . ? 
C4 N3 C5 118.3(2) . . ? 
C13 N3 C5 105.6(2) . . ? 
C3 N4 C5 117.7(2) . . ? 
C6 N5 N2 101.9(2) . . ? 
C4 N6 C6 101.5(2) . . ? 
C5 N7 N8 106.5(2) . . ? 
C13 N8 N7 110.1(2) . . ? 
C2 C1 B5 111.3(2) . . ? 
C2 C1 B4 112.1(2) . . ? 
B5 C1 B4 63.0(2) . . ? 
C2 C1 B3 62.87(18) . . ? 
B5 C1 B3 115.1(2) . . ? 
B4 C1 B3 62.44(18) . . ? 
C2 C1 B6 61.32(19) . . ? 
B5 C1 B6 62.8(2) . . ? 
B4 C1 B6 115.5(2) . . ? 
B3 C1 B6 116.2(2) . . ? 
C2 C1 H1 114(2) . . ? 
B5 C1 H1 124(2) . . ? 
B4 C1 H1 123(2) . . ? 
B3 C1 H1 114(2) . . ? 
B6 C1 H1 115(2) . . ? 
C1 C2 B11 112.0(2) . . ? 
C1 C2 B7 111.0(2) . . ? 
B11 C2 B7 63.58(19) . . ? 
C1 C2 B6 62.20(19) . . ? 
B11 C2 B6 63.0(2) . . ? 
B7 C2 B6 115.8(2) . . ? 
C1 C2 B3 61.27(18) . . ? 
B11 C2 B3 115.3(2) . . ? 
B7 C2 B3 62.22(19) . . ? 
B6 C2 B3 115.5(2) . . ? 
C1 C2 H2 114(2) . . ? 
B11 C2 H2 126(2) . . ? 
B7 C2 H2 120(2) . . ? 
B6 C2 H2 120(2) . . ? 
B3 C2 H2 110(2) . . ? 
N4 C3 N1 123.4(2) . . ? 
N4 C3 N2 119.4(2) . . ? 
N1 C3 N2 117.2(2) . . ? 
N6 C4 N2 112.2(2) . . ? 
N6 C4 N3 132.0(2) . . ? 
N2 C4 N3 115.7(2) . . ? 
N7 C5 N4 126.2(2) . . ? 
N7 C5 N3 109.9(2) . . ? 
N4 C5 N3 123.9(2) . . ? 
N5 C6 N6 115.6(2) . . ? 
N5 C6 C7 123.4(2) . . ? 
N6 C6 C7 120.9(2) . . ? 
C12 C7 C8 119.9(3) . . ? 
C12 C7 C6 119.9(2) . . ? 
C8 C7 C6 120.3(2) . . ? 
C9 C8 C7 119.7(3) . . ? 
C9 C8 H8A 120.2 . . ? 
C7 C8 H8A 120.2 . . ? 
C8 C9 C10 120.5(3) . . ? 
C8 C9 H9A 119.8 . . ? 
C10 C9 H9A 119.8 . . ? 
C11 C10 C9 120.0(3) . . ? 
C11 C10 H10A 120.0 . . ? 
C9 C10 H10A 120.0 . . ? 
C10 C11 C12 120.2(3) . . ? 
C10 C11 H11A 119.9 . . ? 
C12 C11 H11A 119.9 . . ? 
C11 C12 C7 119.8(3) . . ? 
C11 C12 H12A 120.1 . . ? 
C7 C12 H12A 120.1 . . ? 
N8 C13 N3 107.9(2) . . ? 
N8 C13 C14 126.0(2) . . ? 
N3 C13 C14 125.9(2) . . ? 
C15 C14 C19 119.6(3) . . ? 
C15 C14 C13 121.5(3) . . ? 
C19 C14 C13 118.8(3) . . ? 
C16 C15 C14 120.0(3) . . ? 
C16 C15 H15A 120.0 . . ? 
C14 C15 H15A 120.0 . . ? 
C15 C16 C17 120.1(3) . . ? 
C15 C16 H16A 119.9 . . ? 
C17 C16 H16A 119.9 . . ? 
C18 C17 C16 120.2(3) . . ? 
C18 C17 H17A 119.9 . . ? 
C16 C17 H17A 119.9 . . ? 
C17 C18 C19 120.0(3) . . ? 
C17 C18 H18A 120.0 . . ? 
C19 C18 H18A 120.0 . . ? 
C18 C19 C14 120.0(3) . . ? 
C18 C19 H19A 120.0 . . ? 
C14 C19 H19A 120.0 . . ? 
N1 B3 C1 123.0(2) . . ? 
N1 B3 C2 120.0(2) . . ? 
C1 B3 C2 55.86(17) . . ? 
N1 B3 B8 127.9(2) . . ? 
C1 B3 B8 104.1(2) . . ? 
C2 B3 B8 103.7(2) . . ? 
N1 B3 B4 126.6(2) . . ? 
C1 B3 B4 58.26(18) . . ? 
C2 B3 B4 103.2(2) . . ? 
B8 B3 B4 60.27(18) . . ? 
N1 B3 B7 120.9(2) . . ? 
C1 B3 B7 102.9(2) . . ? 
C2 B3 B7 57.55(17) . . ? 
B8 B3 B7 60.44(18) . . ? 
B4 B3 B7 107.9(2) . . ? 
C1 B4 B3 59.30(18) . . ? 
C1 B4 B5 58.31(19) . . ? 
B3 B4 B5 108.6(2) . . ? 
C1 B4 B8 104.3(2) . . ? 
B3 B4 B8 59.59(18) . . ? 
B5 B4 B8 108.3(2) . . ? 
C1 B4 B9 103.9(2) . . ? 
B3 B4 B9 108.1(2) . . ? 
B5 B4 B9 59.8(2) . . ? 
B8 B4 B9 60.30(19) . . ? 
C1 B4 H4 118.0(17) . . ? 
B3 B4 H4 116.5(17) . . ? 
B5 B4 H4 120.9(17) . . ? 
B8 B4 H4 126.6(17) . . ? 
B9 B4 H4 129.7(17) . . ? 
C1 B5 B9 104.4(2) . . ? 
C1 B5 B10 104.5(3) . . ? 
B9 B5 B10 59.9(2) . . ? 
C1 B5 B4 58.66(18) . . ? 
B9 B5 B4 60.2(2) . . ? 
B10 B5 B4 108.3(2) . . ? 
C1 B5 B6 59.34(19) . . ? 
B9 B5 B6 108.1(3) . . ? 
B10 B5 B6 59.7(2) . . ? 
B4 B5 B6 109.0(2) . . ? 
C1 B5 H5 119.0(18) . . ? 
B9 B5 H5 127.3(19) . . ? 
B10 B5 H5 127.1(19) . . ? 
B4 B5 H5 119(2) . . ? 
B6 B5 H5 119(2) . . ? 
C2 B6 C1 56.48(18) . . ? 
C2 B6 B10 103.8(2) . . ? 
C1 B6 B10 103.5(3) . . ? 
C2 B6 B11 58.03(19) . . ? 
C1 B6 B11 103.5(2) . . ? 
B10 B6 B11 60.2(2) . . ? 
C2 B6 B5 103.5(2) . . ? 
C1 B6 B5 57.82(19) . . ? 
B10 B6 B5 59.9(2) . . ? 
B11 B6 B5 107.7(2) . . ? 
C2 B6 H6 119(2) . . ? 
C1 B6 H6 115.7(19) . . ? 
B10 B6 H6 133.2(19) . . ? 
B11 B6 H6 128(2) . . ? 
B5 B6 H6 122(2) . . ? 
C2 B7 B12 104.0(2) . . ? 
C2 B7 B3 60.23(18) . . ? 
B12 B7 B3 108.1(2) . . ? 
C2 B7 B8 104.9(2) . . ? 
B12 B7 B8 60.31(19) . . ? 
B3 B7 B8 59.34(18) . . ? 
C2 B7 B11 58.06(18) . . ? 
B12 B7 B11 59.9(2) . . ? 
B3 B7 B11 109.1(2) . . ? 
B8 B7 B11 108.4(2) . . ? 
C2 B7 H7 116.7(18) . . ? 
B12 B7 H7 131.9(17) . . ? 
B3 B7 H7 113.8(17) . . ? 
B8 B7 H7 125.7(19) . . ? 
B11 B7 H7 122.6(18) . . ? 
B3 B8 B4 60.14(18) . . ? 
B3 B8 B7 60.23(18) . . ? 
B4 B8 B7 107.6(2) . . ? 
B3 B8 B9 108.2(2) . . ? 
B4 B8 B9 59.95(19) . . ? 
B7 B8 B9 107.2(2) . . ? 
B3 B8 B12 108.2(2) . . ? 
B4 B8 B12 107.6(2) . . ? 
B7 B8 B12 59.55(18) . . ? 
B9 B8 B12 59.62(19) . . ? 
B3 B8 H8 117.7(16) . . ? 
B4 B8 H8 120.5(17) . . ? 
B7 B8 H8 121.3(17) . . ? 
B9 B8 H8 124.7(16) . . ? 
B12 B8 H8 125.0(16) . . ? 
B10 B9 B5 60.1(2) . . ? 
B10 B9 B12 60.3(2) . . ? 
B5 B9 B12 108.1(3) . . ? 
B10 B9 B4 108.2(2) . . ? 
B5 B9 B4 60.0(2) . . ? 
B12 B9 B4 107.9(2) . . ? 
B10 B9 B8 108.6(3) . . ? 
B5 B9 B8 107.9(2) . . ? 
B12 B9 B8 60.21(19) . . ? 
B4 B9 B8 59.74(18) . . ? 
B10 B9 H9 122.5(18) . . ? 
B5 B9 H9 122.4(18) . . ? 
B12 B9 H9 121.7(17) . . ? 
B4 B9 H9 121.0(18) . . ? 
B8 B9 H9 120.4(18) . . ? 
B6 B10 B9 108.7(3) . . ? 
B6 B10 B5 60.4(2) . . ? 
B9 B10 B5 60.0(2) . . ? 
B6 B10 B11 60.1(2) . . ? 
B9 B10 B11 108.1(3) . . ? 
B5 B10 B11 108.0(2) . . ? 
B6 B10 B12 108.2(2) . . ? 
B9 B10 B12 60.0(2) . . ? 
B5 B10 B12 107.7(3) . . ? 
B11 B10 B12 59.8(2) . . ? 
B6 B10 H10 124(2) . . ? 
B9 B10 H10 120(2) . . ? 
B5 B10 H10 122.3(19) . . ? 
B11 B10 H10 123(2) . . ? 
B12 B10 H10 120(2) . . ? 
C2 B11 B12 104.1(2) . . ? 
C2 B11 B6 58.97(19) . . ? 
B12 B11 B6 108.2(3) . . ? 
C2 B11 B10 104.2(2) . . ? 
B12 B11 B10 60.2(2) . . ? 
B6 B11 B10 59.7(2) . . ? 
C2 B11 B7 58.36(18) . . ? 
B12 B11 B7 59.71(19) . . ? 
B6 B11 B7 108.2(2) . . ? 
B10 B11 B7 107.8(2) . . ? 
C2 B11 H11 118.7(18) . . ? 
B12 B11 H11 128.2(18) . . ? 
B6 B11 H11 118.0(18) . . ? 
B10 B11 H11 127.0(18) . . ? 
B7 B11 H11 120.3(18) . . ? 
B7 B12 B9 108.1(2) . . ? 
B7 B12 B11 60.4(2) . . ? 
B9 B12 B11 108.0(2) . . ? 
B7 B12 B10 108.1(2) . . ? 
B9 B12 B10 59.7(2) . . ? 
B11 B12 B10 60.0(2) . . ? 
B7 B12 B8 60.14(18) . . ? 
B9 B12 B8 60.17(19) . . ? 
B11 B12 B8 108.6(2) . . ? 
B10 B12 B8 108.1(2) . . ? 
B7 B12 H12 120.9(16) . . ? 
B9 B12 H12 122.2(17) . . ? 
B11 B12 H12 121.5(18) . . ? 
B10 B12 H12 122.5(17) . . ? 
B8 B12 H12 120.9(18) . . ? 
C1S O1S H1S 106(3) . . ? 
O1S C1S H1SA 109.5 . . ? 
O1S C1S H1SB 109.5 . . ? 
H1SA C1S H1SB 109.5 . . ? 
O1S C1S H1SC 109.5 . . ? 
H1SA C1S H1SC 109.5 . . ? 
H1SB C1S H1SC 109.5 . . ? 
C2S O2S H2S 107(3) . . ? 
O2S C2S H2SA 109.5 . . ? 
O2S C2S H2SB 109.5 . . ? 
H2SA C2S H2SB 109.5 . . ? 
O2S C2S H2SC 109.5 . . ? 
H2SA C2S H2SC 109.5 . . ? 
H2SB C2S H2SC 109.5 . . ? 


loop_
_geom_hbond_atom_site_label_D
_geom_hbond_atom_site_label_H
_geom_hbond_atom_site_label_A
_geom_hbond_distance_DH
_geom_hbond_distance_HA
_geom_hbond_distance_DA
_geom_hbond_angle_DHA
_geom_hbond_site_symmetry_A
_geom_hbond_publ_flag
N1      H1N     N5         0.80(4)    2.47(4)   2.833(3)     109(3)     .   yes
N1      H1N     O1S        0.80(4)    2.12(4)   2.892(3)     162(4)   8_544 yes
O1S     H1S     O2S        0.85(5)    1.92(5)   2.760(3)     168(4)     .   yes
O2S     H2S     N8         0.79(4)    2.05(4)   2.815(3)     161(4)     .   yes


  
_refine_diff_density_max    0.247 
_refine_diff_density_min   -0.205 
_refine_diff_density_rms    0.042 
  
_shelx_res_file 
; 
  
    abb.res created by SHELXL-2014/7 
  
  
TITL ab in Aba2 
CELL 0.71073  26.62350  28.96870   7.27190  90.0000  90.0000  90.0000 
ZERR    8.00   0.00230   0.00240   0.00060   0.0000   0.0000   0.0000 
LATT -5 
SYMM -X, -Y, Z 
SYMM 0.5+X, 0.5-Y, Z 
SYMM 0.5-X, 0.5+Y, Z 
SFAC C H B N O 
UNIT 168 240 80 64 16 
  
TEMP -153.000 
SIZE 0.05 0.10 0.55 
acta 
omit -4 56 
  
omit     2   0   0 
omit     0   2   0 
  
L.S. 8 
BOND $H 
FMAP 2 
PLAN 20 
  
WGHT    0.042900    3.082800 
FVAR       0.08988 
N1    4    0.135366    0.089674    0.543701    11.00000    0.01529    0.01988 = 
         0.02422    0.00410   -0.00036   -0.00019 
H1N   2    0.109295    0.098423    0.501872    11.00000    0.03403 
N2    4    0.166251    0.159353    0.428651    11.00000    0.01589    0.01730 = 
         0.01998    0.00121   -0.00027   -0.00003 
N3    4    0.251091    0.177789    0.428572    11.00000    0.01738    0.01840 = 
         0.01806    0.00110   -0.00054   -0.00092 
N4    4    0.221765    0.103741    0.544503    11.00000    0.01756    0.01971 = 
         0.02152    0.00229    0.00018   -0.00038 
N5    4    0.120527    0.176369    0.371942    11.00000    0.01660    0.01975 = 
         0.01938    0.00057   -0.00083    0.00186 
N6    4    0.184404    0.226736    0.301206    11.00000    0.01789    0.01920 = 
         0.01789   -0.00124   -0.00011   -0.00030 
N7    4    0.307876    0.125047    0.507058    11.00000    0.01895    0.02059 = 
         0.02238   -0.00155    0.00000   -0.00166 
N8    4    0.332089    0.164616    0.442065    11.00000    0.01986    0.02108 = 
         0.01934   -0.00265    0.00057   -0.00259 
C1    1    0.182826    0.022518    0.762197    11.00000    0.02114    0.01835 = 
         0.02636    0.00112   -0.00403   -0.00178 
C2    1    0.127945    0.032687    0.852456    11.00000    0.02760    0.02204 = 
         0.01846   -0.00044    0.00341   -0.00209 
C3    1    0.175312    0.116264    0.508352    11.00000    0.02185    0.01882 = 
         0.01462   -0.00046   -0.00051   -0.00016 
C4    1    0.202629    0.190410    0.383831    11.00000    0.01862    0.01818 = 
         0.01344   -0.00160    0.00119   -0.00120 
C5    1    0.259224    0.133467    0.498006    11.00000    0.02147    0.01910 = 
         0.01377   -0.00124   -0.00015    0.00020 
C6    1    0.133498    0.216418    0.296925    11.00000    0.01914    0.01979 = 
         0.01422   -0.00307    0.00058   -0.00119 
C7    1    0.097371    0.248260    0.212002    11.00000    0.02039    0.02024 = 
         0.01478   -0.00025    0.00138    0.00262 
C8    1    0.049026    0.233101    0.166797    11.00000    0.02311    0.02171 = 
         0.02222    0.00177    0.00153    0.00074 
AFIX  43 
H8A   2    0.039038    0.202372    0.194077    11.00000   -1.20000 
AFIX   0 
C9    1    0.015763    0.263161    0.081965    11.00000    0.02048    0.03115 = 
         0.02899   -0.00019   -0.00189    0.00324 
AFIX  43 
H9A   2   -0.017096    0.252939    0.051374    11.00000   -1.20000 
AFIX   0 
C10   1    0.030137    0.308062    0.041455    11.00000    0.02888    0.02733 = 
         0.02319    0.00074   -0.00132    0.01008 
AFIX  43 
H10A  2    0.007309    0.328323   -0.018263    11.00000   -1.20000 
AFIX   0 
C11   1    0.077832    0.323378    0.088122    11.00000    0.03314    0.01870 = 
         0.02597    0.00147    0.00177    0.00319 
AFIX  43 
H11A  2    0.087404    0.354298    0.062286    11.00000   -1.20000 
AFIX   0 
C12   1    0.111683    0.293576    0.172660    11.00000    0.02323    0.02153 = 
         0.02465   -0.00187    0.00016   -0.00005 
AFIX  43 
H12A  2    0.144439    0.304022    0.203537    11.00000   -1.20000 
AFIX   0 
C13   1    0.298776    0.196115    0.396397    11.00000    0.01851    0.02286 = 
         0.01522   -0.00314   -0.00032   -0.00356 
C14   1    0.309796    0.243339    0.334671    11.00000    0.02512    0.02394 = 
         0.01443    0.00004   -0.00370   -0.00667 
C15   1    0.279453    0.280453    0.384733    11.00000    0.02752    0.02520 = 
         0.02540    0.00020   -0.00529   -0.00456 
AFIX  43 
H15A  2    0.250396    0.275431    0.457874    11.00000   -1.20000 
AFIX   0 
C16   1    0.291678    0.324694    0.327785    11.00000    0.04337    0.02449 = 
         0.03384    0.00241   -0.01067   -0.00422 
AFIX  43 
H16A  2    0.270859    0.349968    0.361261    11.00000   -1.20000 
AFIX   0 
C17   1    0.334280    0.332143    0.221937    11.00000    0.06703    0.02759 = 
         0.02791    0.00748   -0.00766   -0.01968 
AFIX  43 
H17A  2    0.342219    0.362437    0.181219    11.00000   -1.20000 
AFIX   0 
C18   1    0.365238    0.295582    0.175502    11.00000    0.05245    0.04365 = 
         0.02153   -0.00233    0.00781   -0.02649 
AFIX  43 
H18A  2    0.394650    0.300882    0.104609    11.00000   -1.20000 
AFIX   0 
C19   1    0.353368    0.251254    0.232334    11.00000    0.03390    0.03557 = 
         0.01889   -0.00632    0.00180   -0.01178 
AFIX  43 
H19A  2    0.374863    0.226232    0.201706    11.00000   -1.20000 
AFIX   0 
B3    3    0.136381    0.042319    0.616733    11.00000    0.01682    0.02071 = 
         0.01748   -0.00030   -0.00067   -0.00084 
B4    3    0.178201   -0.002601    0.550592    11.00000    0.01998    0.02069 = 
         0.02463   -0.00199    0.00191   -0.00029 
B5    3    0.194541   -0.035097    0.749681    11.00000    0.02346    0.02092 = 
         0.04007    0.00169   -0.00578    0.00056 
B6    3    0.163128   -0.011110    0.944744    11.00000    0.03667    0.02611 = 
         0.02431    0.00511   -0.00738   -0.00410 
B7    3    0.080989    0.016194    0.707772    11.00000    0.02083    0.02018 = 
         0.02362    0.00245    0.00314   -0.00298 
B8    3    0.112372   -0.008383    0.513563    11.00000    0.02192    0.02193 = 
         0.01905   -0.00114   -0.00033   -0.00198 
B9    3    0.148163   -0.056510    0.595646    11.00000    0.02615    0.01968 = 
         0.03208   -0.00260   -0.00183   -0.00029 
B10   3    0.139078   -0.061478    0.836905    11.00000    0.03177    0.02197 = 
         0.03292    0.00657   -0.00507   -0.00236 
B11   3    0.097257   -0.016761    0.907411    11.00000    0.03274    0.02484 = 
         0.02341    0.00467    0.00332   -0.00477 
B12   3    0.087992   -0.044715    0.691887    11.00000    0.02313    0.01906 = 
         0.03194    0.00229   -0.00023   -0.00221 
H1    2    0.207371    0.044968    0.790719    11.00000    0.03229 
H2    2    0.125529    0.061229    0.915640    11.00000    0.03904 
H4    2    0.205204    0.005803    0.452065    11.00000    0.02126 
H5    2    0.232593   -0.047156    0.765175    11.00000    0.03922 
H6    2    0.181347   -0.005401    1.068065    11.00000    0.03076 
H7    2    0.048228    0.038219    0.702411    11.00000    0.02850 
H8    2    0.097312   -0.005618    0.380251    11.00000    0.02171 
H9    2    0.154654   -0.086330    0.507659    11.00000    0.03202 
H10   2    0.139352   -0.095238    0.900190    11.00000    0.04570 
H11   2    0.074118   -0.016874    1.020266    11.00000    0.02596 
H12   2    0.054822   -0.067504    0.666629    11.00000    0.02796 
O1S   5    0.457734    0.101470    0.844364    11.00000    0.02343    0.02920 = 
         0.03077    0.00126    0.00163    0.00648 
H1S   2    0.445610    0.111855    0.743803    11.00000    0.05847 
C1S   1    0.494210    0.068084    0.792835    11.00000    0.02748    0.03750 = 
         0.04065   -0.00114   -0.00147    0.00938 
AFIX 137 
H1SA  2    0.499670    0.046615    0.895047    11.00000   -1.50000 
H1SB  2    0.525851    0.083639    0.762797    11.00000   -1.50000 
H1SC  2    0.482266    0.050972    0.685118    11.00000   -1.50000 
AFIX   0 
O2S   5    0.428058    0.125963    0.494139    11.00000    0.02050    0.03004 = 
         0.03145    0.00187    0.00208    0.00114 
H2S   2    0.404577    0.142615    0.481768    11.00000    0.05461 
C2S   1    0.464867    0.139208    0.361521    11.00000    0.02976    0.04194 = 
         0.03385   -0.00573    0.00671   -0.00765 
AFIX 137 
H2SA  2    0.495612    0.121257    0.380958    11.00000   -1.50000 
H2SB  2    0.472322    0.172163    0.374999    11.00000   -1.50000 
H2SC  2    0.451937    0.133298    0.237559    11.00000   -1.50000 
  
AFIX   0 
HKLF 4 
  
REM  ab in Aba2 
REM R1 =  0.0457 for    5735 Fo > 4sig(Fo)  and  0.0608 for all    6771 data 
REM    428 parameters refined using      1 restraints 
  
END 
  
WGHT      0.0427      3.1029 
  
REM Highest difference peak  0.247,  deepest hole -0.205,  1-sigma level  0.042 
Q1    1   0.1815  0.0001  0.6652  11.00000  0.05    0.25 
Q2    1   0.1135  0.0159  0.6107  11.00000  0.05    0.24 
Q3    1   0.1313  0.0350  0.7372  11.00000  0.05    0.23 
Q4    1   0.1518 -0.0519  0.7193  11.00000  0.05    0.22 
Q5    1   0.1822 -0.0302  0.6404  11.00000  0.05    0.20 
Q6    1   0.1302  0.0242  0.5151  11.00000  0.05    0.20 
Q7    1   0.1018 -0.0423  0.8053  11.00000  0.05    0.19 
Q8    1   0.2197  0.1009  0.6645  11.00000  0.05    0.18 
Q9    1   0.3092  0.2422  0.2351  11.00000  0.05    0.18 
Q10   1   0.1625 -0.0377  0.8473  11.00000  0.05    0.18 
Q11   1   0.1661  0.1543  0.3151  11.00000  0.05    0.18 
Q12   1   0.0865 -0.0131  0.7699  11.00000  0.05    0.18 
Q13   1   0.1858  0.2251  0.1811  11.00000  0.05    0.18 
Q14   1   0.3052  0.2240  0.3569  11.00000  0.05    0.17 
Q15   1   0.1423  0.0726  0.6264  11.00000  0.05    0.17 
Q16   1   0.1029  0.2436  0.3248  11.00000  0.05    0.17 
Q17   1   0.3602  0.1677  0.3973  11.00000  0.05    0.17 
Q18   1   0.3371  0.1714  0.5638  11.00000  0.05    0.17 
Q19   1   0.2265  0.1095  0.4434  11.00000  0.05    0.16 
Q20   1   0.1199  0.1778  0.2595  11.00000  0.05    0.16 
; 
_shelx_res_checksum   11201 
  
_shelx_hkl_file 
; 
   0   0  -2  355.52    7.29 
   0   0   2  360.18    7.51 
   0   0   2  359.80    7.69 
   0   0   2  349.67    7.42 
   0   0   4    6.43    0.69 
   0   0   4    7.19    1.03 
   0   0   4    6.09    0.75 
   0   0  -4    7.06    0.56 
   0   0  -6   83.05    3.21 
   0   0  -6   82.64    2.18 
   0   0   6   82.02    2.65 
   0   0   6   82.20    2.83 
   0   0   8    2.55    0.91 
   0   0   8    2.59    0.88 
   0   0  -8    1.97    1.11 
   0   0 -10    8.75    1.87 
   0   0  10    4.66    1.29 
   0   1  -1    0.04    0.30 
   0  -1  -1   -0.23    0.20 
   0  -1   1    0.01    0.21 
   0   1   1    0.16    0.18 
   0   1   1    0.21    0.29 
   0  -1   1   -0.03    0.22 
   0   1   1    0.09    0.19 
   0   1   3    0.26    0.59 
   0   1   3    0.15    0.36 
   0  -1   3   -0.80    0.35 
   0   1  -3    0.10    0.27 
   0  -1   3    0.17    0.41 
   0   1   3    0.29    0.41 
   0  -1  -3    0.48    0.34 
   0   1   5   -0.28    0.51 
   0   1  -5   -0.31    0.67 
   0   1  -5    0.33    0.32 
   0   1   5   -0.24    0.64 
   0   1   5   -0.42    0.40 
   0  -1   5    0.63    0.55 
   0  -1   5    0.07    0.46 
   0  -1  -5    0.34    0.37 
   0   1   7    1.94    0.68 
   0   1   7   -1.12    0.57 
   0  -1  -7   -0.18    0.86 
   0  -1   7   -0.14    0.60 
   0  -1   7    0.52    0.71 
   0   1  -7    0.61    0.91 
   0  -1   9    1.65    0.97 
   0   1   9    0.51    0.86 
   0   1  -9    0.05    1.11 
   0  -1   9   -0.06    0.69 
   0  -1  -9    1.72    1.22 
   0   2   0   -0.33    0.03 
   0   2   0   -0.22    0.09 
   0  -2   0   -0.30    0.03 
   0   2   0   -0.33    0.06 
   0  -2   0   -0.31    0.03 
   0   2  -2   97.80    2.52 
   0   2   2  101.04    2.54 
   0   2   2   95.80    2.27 
   0   2   2   92.65    2.17 
   0  -2   2   93.58    2.37 
   0   2  -2   85.21    1.96 
   0  -2  -2   93.32    2.22 
   0  -2   2   91.95    2.32 
   0  -2   4   72.36    2.25 
   0   2   4   72.25    2.01 
   0   2   4   65.59    2.45 
   0   2   4   70.90    2.15 
   0   2  -4   68.39    1.65 
   0   2  -4   68.09    2.46 
   0  -2  -4   67.31    1.89 
   0  -2   4   68.71    2.15 
   0  -2  -6    1.36    0.49 
   0   2  -6    0.56    1.00 
   0   2  -6    1.15    0.46 
   0  -2   6    2.84    0.72 
   0  -2   6    1.97    0.72 
   0   2   6    1.89    0.61 
   0   2   6    1.26    0.62 
   0   2  -8    7.17    1.48 
   0  -2   8    8.36    1.20 
   0  -2  -8    6.67    1.46 
   0   2   8    6.17    1.16 
   0   2   8    6.61    1.02 
   0  -2   8    5.31    1.17 
   0   2 -10    7.62    1.68 
   0  -2 -10   10.00    1.82 
   0  -2  10    4.08    1.29 
   0   2  10    2.98    1.13 
   0   3   1   -0.39    0.17 
   0   3  -1   -0.49    0.35 
   0  -3  -1   -0.22    0.30 
   0  -3   1   -0.70    0.27 
   0  -3   1   -0.22    0.11 
   0   3   1   -0.26    0.30 
   0   3   1   -0.36    0.18 
   0  -3   1   -0.45    0.27 
   0  -3  -1   -0.49    0.22 
   0   3  -3    0.36    0.59 
   0   3   3    0.17    0.38 
   0   3   3   -0.07    0.31 
   0  -3   3    0.25    0.45 
   0  -3  -3    0.52    0.39 
   0   3   3    0.80    0.58 
   0  -3   3    0.11    0.40 
   0   3   5   -0.41    0.37 
   0   3   5    1.04    0.71 
   0   3  -5    0.02    0.69 
   0  -3   5    0.02    0.52 
   0   3   5    0.04    0.47 
   0  -3  -5    0.37    0.43 
   0  -3   5   -0.61    0.46 
   0   3   7    1.25    0.72 
   0   3   7    0.44    0.58 
   0  -3   7   -0.08    0.70 
   0  -3   7    0.19    0.67 
   0  -3  -7   -0.10    0.87 
   0   3  -7   -0.67    0.84 
   0   3   9    0.40    0.82 
   0   3  -9    1.83    1.23 
   0  -3   9   -0.86    0.71 
   0  -3  -9   -0.07    1.10 
   0  -3   9    1.46    0.99 
   0  -4   0  199.43    4.09 
   0   4   0  189.39    4.08 
   0   4   0  192.25    3.97 
   0  -4   0  196.42    3.97 
   0  -4  -2  986.09   19.85 
   0   4   2 1000.00   19.74 
   0   4   2  974.06   19.66 
   0  -4   2  978.77   19.95 
   0  -4   2  966.14   19.91 
   0   4   2  961.31   20.03 
   0   4  -2  972.03   20.01 
   0   4  -4   29.26    1.62 
   0  -4   4   31.33    1.42 
   0   4   4   30.93    1.16 
   0  -4   4   30.58    1.45 
   0  -4  -4   29.31    1.22 
   0   4   4   31.41    1.29 
   0   4   4   29.42    1.63 
   0   4   6   21.59    1.22 
   0  -4  -6   19.83    1.15 
   0  -4   6   21.51    1.46 
   0  -4   6   21.51    1.54 
   0   4  -6   19.00    1.72 
   0   4   6   18.04    1.69 
   0   4   6   19.46    1.36 
   0  -4   8    9.03    1.42 
   0   4   8   11.71    1.37 
   0  -4   8   10.98    1.43 
   0   4  -8   10.56    1.80 
   0  -4  -8   15.80    2.06 
   0   4   8    9.71    1.13 
   0   4 -10    2.39    1.35 
   0  -4 -10    7.67    1.56 
   0  -4  10    0.04    0.87 
   0   4  10    0.76    0.89 
   0   5  -1   -1.25    0.36 
   0  -5   1   -0.05    0.37 
   0  -5   1   -0.04    0.32 
   0   5   1    0.44    0.37 
   0  -5   1   -0.04    0.22 
   0  -5  -1   -0.41    0.35 
   0  -5   3   -0.01    0.44 
   0   5   3   -0.21    0.30 
   0  -5   3   -0.21    0.43 
   0   5   3    0.19    0.35 
   0  -5  -3    0.07    0.42 
   0   5   3    0.38    0.55 
   0   5  -3   -0.72    0.53 
   0  -5   5   -0.25    0.52 
   0   5  -5   -0.05    0.72 
   0  -5   5   -0.16    0.54 
   0   5   5   -0.26    0.64 
   0  -5  -5   -0.33    0.43 
   0   5   5   -0.21    0.38 
   0   5   5   -0.20    0.46 
   0   5  -7    0.31    0.99 
   0   5   7    0.62    0.57 
   0   5   7    0.26    0.82 
   0   5   7    0.17    0.61 
   0  -5   7    0.07    0.71 
   0  -5   7   -1.03    0.59 
   0  -5  -7   -0.09    0.58 
   0   5   9    0.02    0.77 
   0  -5  -9    0.86    1.14 
   0  -5   9    2.32    0.96 
   0  -5   9   -0.52    0.82 
   0   5  -9    1.41    1.26 
   0  -6   0  160.97    3.55 
   0  -6   0  163.10    3.37 
   0   6   0  158.55    3.54 
   0  -6   2  407.76    8.66 
   0  -6   2  401.87    8.65 
   0   6   2  417.08    8.33 
   0  -6  -2  407.22    8.62 
   0   6  -2  409.69    8.66 
   0   6   2  400.01    8.70 
   0   6   2  398.73    8.30 
   0   6   4  143.15    3.53 
   0  -6  -4  143.47    3.60 
   0   6   4  142.86    4.05 
   0  -6   4  140.64    3.83 
   0   6  -4  145.96    4.00 
   0   6   4  146.28    3.40 
   0  -6   4  147.09    3.81 
   0   6   6   33.36    1.59 
   0  -6   6   30.69    1.79 
   0   6   6   31.54    1.41 
   0   6   6   29.88    2.02 
   0  -6  -6   28.94    1.46 
   0  -6   6   33.14    1.82 
   0   6  -6   29.60    1.99 
   0  -6   8    2.51    0.95 
   0  -6   8    1.56    0.96 
   0   6  -8    2.44    1.19 
   0   6   8    2.96    0.90 
   0   7   1    0.06    0.34 
   0  -7  -1   -0.22    0.41 
   0  -7   1    0.28    0.29 
   0  -7   1    0.56    0.41 
   0  -7   1    0.40    0.34 
   0   7  -1   -0.48    0.48 
   0  -7  -3   -0.60    0.43 
   0  -7   3    0.30    0.47 
   0   7   3   -0.45    0.26 
   0   7  -3   -0.38    0.57 
   0   7   3   -0.17    0.30 
   0   7   3    0.64    0.55 
   0  -7   3    0.42    0.49 
   0   7   5   -0.18    0.38 
   0  -7  -5   -1.24    0.41 
   0   7   5   -0.44    0.64 
   0   7   5    0.69    0.47 
   0  -7   5    0.08    0.55 
   0   7  -5   -0.08    0.72 
   0  -7   5   -0.03    0.56 
   0   7   7    0.21    0.48 
   0   7   7   -1.95    0.71 
   0   7   7    0.83    0.63 
   0   7  -7    0.09    0.94 
   0  -7  -7   -1.08    0.56 
   0  -7   7    0.89    0.76 
   0  -7   7    0.04    0.74 
   0   7   9    1.48    0.80 
   0  -7   9    0.50    0.95 
   0  -7  -9    3.11    1.38 
   0   7  -9    1.83    1.19 
   0  -7   9    0.14    0.88 
   0  -8   0   36.58    1.22 
   0  -8   0   35.91    1.15 
   0   8   0   35.30    1.21 
   0  -8   0   37.68    0.99 
   0  -8   2  124.46    3.12 
   0   8   2  121.49    2.64 
   0  -8  -2  124.01    3.10 
   0   8  -2  123.58    3.07 
   0   8   2  119.02    3.09 
   0  -8   2  122.74    3.06 
   0  -8   2  120.99    2.65 
   0   8   4  225.02    5.06 
   0  -8   4  228.89    5.53 
   0   8  -4  222.77    5.59 
   0   8   4  232.77    4.95 
   0  -8   4  213.73    5.48 
   0  -8  -4  225.32    5.31 
   0   8   4  219.93    5.70 
   0   8  -6   31.40    2.06 
   0  -8  -6   30.09    1.53 
   0  -8   6   32.84    1.89 
   0   8   6   32.88    1.53 
   0   8   6   32.44    1.35 
   0   8   6   28.56    2.01 
   0  -8   6   31.52    1.84 
   0  -8   8    8.00    1.33 
   0   8   8    5.61    1.48 
   0   8  -8    7.76    1.51 
   0   8   8    9.58    1.23 
   0  -8   8    6.64    1.33 
   0  -9   1   -0.06    0.40 
   0  -9   1   -0.48    0.30 
   0   9  -1   -0.02    0.39 
   0   9   1    0.55    0.37 
   0  -9   1   -0.35    0.34 
   0  -9  -1   -0.16    0.43 
   0   9   3   -0.27    0.47 
   0   9  -3   -1.05    0.52 
   0  -9  -3    0.35    0.50 
   0  -9   3    1.09    0.54 
   0   9   3   -0.12    0.26 
   0  -9   3    0.02    0.42 
   0   9   5    0.89    0.72 
   0  -9  -5   -0.18    0.54 
   0  -9   5    0.53    0.61 
   0  -9   5   -0.56    0.53 
   0   9   5    0.87    0.46 
   0   9  -5   -0.37    0.75 
   0   9   5    0.01    0.37 
   0   9   7   -0.03    0.56 
   0   9  -7    0.15    0.98 
   0   9   7    0.67    0.89 
   0  -9   7    0.51    0.82 
   0  -9  -7   -0.54    0.63 
   0  -9   7   -0.89    0.69 
   0  -9   9    0.58    0.90 
   0  -9   9    0.18    0.98 
   0   9   9    0.37    0.74 
   0   9  -9    2.30    1.26 
   0 -10   0    9.84    0.74 
   0  10   0    9.74    0.79 
   0 -10   0    9.10    0.53 
   0 -10   0    8.46    0.77 
   0 -10   2  170.06    4.08 
   0 -10   2  170.72    4.15 
   0  10  -2  173.61    4.09 
   0  10   2  166.88    4.11 
   0 -10  -2  173.77    4.18 
   0 -10   2  172.50    3.73 
   0 -10  -4   12.34    1.05 
   0 -10   4   14.63    1.23 
   0  10  -4   15.30    1.31 
   0  10   4   15.32    0.80 
   0  10   4   13.33    0.74 
   0  10   4   14.61    1.31 
   0 -10   4   13.88    1.13 
   0  10   6   30.60    1.29 
   0  10   6   27.35    1.98 
   0 -10  -6   27.48    1.58 
   0 -10   6   29.20    1.85 
   0 -10   6   25.10    1.74 
   0  10  -6   30.53    2.02 
   0  10   6   29.87    1.42 
   0 -10   8   47.86    2.69 
   0  10   8   51.48    2.21 
   0  10   8   49.62    3.05 
   0  10  -8   48.61    2.88 
   0 -10   8   52.71    2.83 
   0 -11   1    0.26    0.37 
   0 -11   1    0.38    0.37 
   0  11   1    1.59    0.45 
   0  11  -1    1.59    0.55 
   0 -11   1    0.50    0.47 
   0 -11  -1    1.69    0.54 
   0  11   3   -0.08    0.24 
   0 -11   3    0.09    0.22 
   0 -11   3    0.60    0.48 
   0  11   3    0.07    0.50 
   0 -11  -3   -0.74    0.51 
   0 -11   3    0.03    0.51 
   0  11  -3   -0.49    0.57 
   0  11  -5    0.39    0.81 
   0  11   5   -0.22    0.37 
   0  11   5   -0.21    0.35 
   0  11   5    0.67    0.71 
   0 -11   5    1.13    0.68 
   0 -11   5    0.01    0.61 
   0 -11  -5    0.52    0.62 
   0 -11  -7    0.13    0.73 
   0  11   7    0.70    0.94 
   0 -11   7   -0.64    0.74 
   0  11   7    1.42    0.58 
   0 -11   7    0.46    0.76 
   0  11  -7    1.01    1.03 
   0 -11   9    0.18    1.00 
   0 -11   9    0.42    0.98 
   0  11   9    1.23    1.31 
   0  11  -9    0.58    1.16 
   0 -12   0   13.11    0.89 
   0  12   0   12.20    0.94 
   0 -12   0   12.30    0.86 
   0 -12   0   12.30    0.63 
   0  12   2   25.46    1.22 
   0  12  -2   26.09    1.31 
   0 -12   2   26.27    1.20 
   0 -12   2   25.32    1.30 
   0 -12   2   26.99    0.98 
   0 -12  -2   27.17    1.32 
   0  12   4    1.64    0.37 
   0  12   4    1.17    0.70 
   0 -12   4    1.11    0.65 
   0 -12  -4    0.96    0.64 
   0 -12   4    1.97    0.65 
   0  12  -4   -0.12    0.66 
   0  12   6   50.17    2.61 
   0 -12   6   49.27    2.36 
   0 -12   6   41.71    2.24 
   0  12   6   51.16    1.79 
   0  12   6   50.75    1.81 
   0 -12  -6   48.11    2.12 
   0  12  -6   47.71    2.46 
   0  12  -8   35.52    2.57 
   0 -12  -8   33.85    2.03 
   0  12   8   37.94    2.80 
   0  12   8   34.94    1.88 
   0 -12   8   37.93    2.51 
   0 -12   8   31.24    2.31 
   0  13  -1    0.26    0.51 
   0 -13   1    1.28    0.51 
   0  13   1    0.23    0.45 
   0 -13   1   -0.08    0.34 
   0 -13   1    0.62    0.42 
   0 -13  -1    0.43    0.54 
   0 -13  -3    0.28    0.53 
   0 -13   3    0.71    0.55 
   0  13  -3    0.38    0.62 
   0 -13   3   -0.29    0.27 
   0  13   3    0.14    0.50 
   0 -13   3    0.70    0.50 
   0 -13   5   -1.51    0.54 
   0  13   5    0.31    0.38 
   0  13  -5   -0.91    0.73 
   0 -13   5   -0.36    0.57 
   0  13   5    0.18    0.69 
   0 -13  -5   -0.42    0.59 
   0  13   7    0.61    0.96 
   0  13   7    0.19    0.52 
   0 -13  -7   -0.66    0.72 
   0 -13   7   -0.43    0.76 
   0 -13   7   -0.28    0.84 
   0  13  -7   -0.30    1.01 
   0 -13   9   -0.65    0.93 
   0  13   9    0.19    1.24 
   0 -13   9   -1.51    0.83 
   0  13  -9    1.40    1.28 
   0  14   0  192.97    4.72 
   0 -14   0  200.05    4.71 
   0 -14   0  201.92    4.31 
   0 -14   0  197.13    4.57 
   0  14  -2    8.37    0.96 
   0 -14   2    7.93    0.86 
   0 -14   2    7.60    0.76 
   0 -14   2    7.11    0.65 
   0 -14  -2    7.84    0.88 
   0  14   2    6.65    0.83 
   0  14  -4    3.31    0.90 
   0  14   4    4.01    0.90 
   0 -14  -4    4.39    0.85 
   0  14   4    4.49    0.44 
   0 -14   4    4.56    0.81 
   0 -14   4    3.82    0.83 
   0  14  -6   27.01    1.99 
   0 -14  -6   28.97    1.77 
   0  14   6   30.81    1.31 
   0  14   6   27.93    2.11 
   0 -14   6   28.68    1.89 
   0 -14   6   31.24    2.02 
   0 -14  -8   22.30    1.79 
   0  14   8   23.85    2.74 
   0 -14   8   22.25    2.30 
   0 -14   8   21.21    2.17 
   0  14  -8   22.35    2.23 
   0 -15   1   -0.02    0.35 
   0 -15   1    0.77    0.51 
   0 -15  -1    0.16    0.55 
   0 -15   1   -0.19    0.41 
   0  15   1    0.59    0.50 
   0  15  -1    0.41    0.60 
   0  15   3   -0.17    0.52 
   0 -15  -3    0.11    0.58 
   0 -15   3    0.39    0.51 
   0  15  -3   -0.66    0.62 
   0 -15   3    0.46    0.33 
   0 -15   3   -0.36    0.53 
   0  15   5    0.35    0.73 
   0  15   5   -0.04    0.34 
   0  15  -5   -0.29    0.85 
   0 -15   5    0.39    0.71 
   0 -15  -5   -0.62    0.58 
   0 -15   5    0.94    0.70 
   0 -15   7    0.49    0.87 
   0  15  -7    0.77    0.94 
   0  15   7    0.03    0.96 
   0 -15   7   -0.08    0.83 
   0 -15  -7   -0.06    0.77 
   0 -15   9   -0.09    0.91 
   0  15  -9    0.82    1.16 
   0  15   9    0.46    1.27 
   0 -15   9    0.20    1.08 
   0 -16   0   42.70    1.25 
   0  16   0   41.65    1.71 
   0 -16   0   41.84    1.56 
   0 -16   0   43.00    1.64 
   0 -16   2   72.22    2.07 
   0 -16   2   74.14    2.25 
   0  16   2   70.75    2.29 
   0 -16  -2   71.25    2.43 
   0 -16   2   71.29    2.40 
   0  16  -2   75.13    2.48 
   0  16   4    9.70    1.18 
   0 -16   4    8.50    1.08 
   0 -16   4    9.15    1.13 
   0 -16  -4   10.29    1.22 
   0  16  -4    8.13    1.14 
   0 -16   6   14.38    1.61 
   0  16   6   14.97    1.80 
   0 -16  -6   16.56    1.52 
   0 -16   6   14.09    1.62 
   0  16  -6   13.45    1.64 
   0  16  -8    6.92    1.52 
   0  16   8   10.24    1.87 
   0 -16   8   12.47    1.75 
   0 -16   8   10.53    1.75 
   0 -16  -8    9.95    1.45 
   0 -17  -1   -0.30    0.43 
   0  17   1   -0.12    0.48 
   0  17  -1   -0.46    0.59 
   0 -17  -1   -0.15    0.53 
   0 -17   1   -0.05    0.48 
   0 -17   1    0.05    0.36 
   0 -17   1   -0.56    0.46 
   0  17   3   -0.04    0.54 
   0 -17   3   -0.19    0.36 
   0 -17  -3    0.03    0.60 
   0  17  -3   -0.32    0.68 
   0 -17   3   -0.01    0.57 
   0 -17   3   -0.01    0.47 
   0  17   5   -0.19    0.70 
   0  17  -5   -0.44    0.82 
   0 -17  -5    0.17    0.66 
   0 -17   5   -0.15    0.67 
   0 -17   5   -0.28    0.61 
   0 -17  -7   -0.75    0.77 
   0 -17   7   -0.21    0.87 
   0 -17   7   -0.89    0.80 
   0  17  -7    0.09    1.01 
   0  17   7    1.39    1.11 
   0  17   9    0.82    1.32 
   0  17  -9    0.57    1.26 
   0 -17   9    1.01    1.16 
   0 -17   9    0.66    1.05 
   0 -18   0   11.75    0.67 
   0 -18   0   13.15    1.04 
   0 -18   0   14.73    1.13 
   0  18   0   13.51    1.22 
   0 -18   2   18.26    1.31 
   0 -18  -2   16.47    1.29 
   0 -18   2   16.90    1.08 
   0 -18   2   17.59    1.03 
   0  18  -2   18.50    1.42 
   0  18   2   17.83    1.18 
   0 -18   4    2.47    0.76 
   0  18  -4    4.43    1.02 
   0 -18   4    3.60    0.47 
   0  18   4    3.24    0.90 
   0 -18   4    4.18    0.93 
   0 -18  -4    4.66    0.94 
   0 -18   6   17.76    1.71 
   0 -18  -6   21.40    1.73 
   0  18  -6   19.06    1.90 
   0  18   6   18.71    1.94 
   0 -18   6   17.18    1.78 
   0 -18   8   11.79    1.81 
   0  18  -8   12.07    1.80 
   0  18   8   15.44    2.30 
   0 -18   8   13.86    2.00 
   0 -18  -8   13.94    1.72 
   0  19  -1   -0.22    0.60 
   0 -19  -1    0.29    0.60 
   0 -19  -1    0.01    0.45 
   0 -19   1    0.69    0.52 
   0 -19   1    0.33    0.54 
   0 -19   1   -0.28    0.35 
   0  19   1   -0.02    0.52 
   0 -19  -3   -0.76    0.62 
   0 -19   3   -0.07    0.48 
   0  19   3    0.67    0.60 
   0  19  -3    0.57    0.78 
   0 -19   3   -0.79    0.41 
   0 -19   3    0.56    0.67 
   0  19  -5   -1.22    0.87 
   0 -19   5   -0.08    0.70 
   0  19   5   -1.00    0.68 
   0 -19   5   -0.02    0.62 
   0 -19  -5    0.42    0.72 
   0 -19   7   -0.49    0.83 
   0 -19  -7   -0.38    0.87 
   0 -19   7    0.19    0.95 
   0  19  -7    0.35    1.11 
   0  19   7   -0.66    0.96 
   0 -20   0    6.77    0.58 
   0 -20   0    9.83    1.05 
   0  20   0    8.27    1.07 
   0 -20   0    7.27    0.84 
   0 -20   2   41.81    1.66 
   0  20   2   41.88    1.81 
   0 -20   2   41.55    1.68 
   0 -20   2   45.17    1.96 
   0 -20  -2   44.59    1.56 
   0  20  -2   44.03    2.11 
   0 -20  -2   40.98    1.97 
   0  20   4    9.24    1.32 
   0 -20  -4    6.80    1.14 
   0 -20   4    8.39    1.11 
   0 -20   4    9.47    0.80 
   0 -20   4    7.64    1.20 
   0  20  -4    8.88    1.30 
   0 -20   6   18.21    1.75 
   0  20   6   20.45    2.06 
   0  20  -6   21.19    2.03 
   0 -20   6   21.20    1.95 
   0 -20  -6   18.99    1.78 
   0 -20   8    5.84    1.47 
   0  20  -8    4.44    1.47 
   0  20   8    5.69    1.72 
   0 -20  -8    2.86    1.17 
   0 -20   8    7.37    1.62 
   0 -21   1    0.06    0.56 
   0 -21   1   -0.68    0.53 
   0  21  -1    0.50    0.73 
   0 -21  -1   -0.25    0.60 
   0 -21  -1   -0.04    0.48 
   0 -21   1    0.16    0.35 
   0  21   1    0.23    0.59 
   0  21   3    0.31    0.65 
   0  21  -3    0.41    0.91 
   0 -21  -3   -0.29    0.67 
   0 -21   3   -0.19    0.49 
   0 -21   3    0.61    0.67 
   0 -21   3    0.02    0.46 
   0  21   5   -1.39    0.65 
   0 -21  -5   -0.16    0.77 
   0  21  -5   -0.36    0.93 
   0 -21   5    0.33    0.83 
   0 -21   5   -0.36    0.64 
   0 -21  -7    0.46    0.91 
   0 -21   7    0.69    0.98 
   0  21  -7    0.70    1.25 
   0 -21   7   -1.26    0.80 
   0  21   7    0.83    1.13 
   0 -22   0    3.42    0.45 
   0 -22   0    3.02    0.79 
   0  22   0    3.12    0.88 
   0 -22   0    3.76    0.72 
   0  22   2   25.27    1.56 
   0 -22   2   29.69    1.42 
   0 -22   2   29.48    1.72 
   0 -22   2   27.64    1.44 
   0 -22  -2   27.53    1.73 
   0  22  -2   29.44    1.89 
   0 -22  -2   28.94    1.34 
   0 -22  -4   33.09    1.99 
   0  22  -4   35.69    2.24 
   0 -22   4   34.60    1.86 
   0 -22   4   35.55    2.07 
   0  22   4   30.22    1.95 
   0  22   6    0.27    0.95 
   0 -22   6    0.13    0.83 
   0  22  -6    0.83    1.08 
   0 -22   6    2.31    1.04 
   0 -22  -6    2.79    1.03 
   0  22   8    1.29    1.40 
   0 -22   8    0.27    1.09 
   0 -22   8    0.54    1.11 
   0  22  -8    0.58    1.29 
   0 -22  -8    2.08    1.14 
   0 -23   1    0.32    0.65 
   0  23   1    0.73    0.64 
   0 -23  -1   -0.13    0.48 
   0 -23   1   -0.17    0.55 
   0 -23  -1    0.53    0.72 
   0 -23   1    0.21    0.39 
   0  23  -1    0.42    0.79 
   0 -23   3    0.04    0.53 
   0 -23   3    0.12    0.52 
   0  23   3    0.78    0.73 
   0 -23   3   -0.93    0.63 
   0 -23  -3   -0.46    0.45 
   0 -23  -3    0.87    0.80 
   0  23  -3    1.79    1.03 
   0 -23   5    0.33    0.83 
   0 -23   5    0.06    0.69 
   0  23   5    0.57    0.89 
   0  23  -5    0.47    1.07 
   0 -23  -5    0.94    0.90 
   0  23   7   -1.45    1.03 
   0 -23   7   -0.34    0.95 
   0  23  -7    0.25    1.20 
   0 -23  -7   -0.25    0.90 
   0 -23   7    0.49    0.97 
   0 -24   0    7.97    1.09 
   0  24   0    6.47    1.12 
   0 -24   0    7.78    0.63 
   0 -24   0    8.76    0.99 
   0  24   2   21.57    1.51 
   0  24  -2   26.93    1.93 
   0 -24  -2   21.00    1.64 
   0 -24   2   23.25    1.43 
   0 -24   2   21.65    1.27 
   0 -24   2   21.76    1.63 
   0 -24  -2   24.35    1.29 
   0 -24   4   42.80    2.11 
   0  24   4   46.20    2.38 
   0 -24  -4   41.60    2.31 
   0  24  -4   43.99    2.52 
   0 -24   4   46.56    2.41 
   0 -24   6    1.20    0.88 
   0  24   6    3.80    1.23 
   0 -24  -6    4.98    1.22 
   0  24  -6    2.88    1.31 
   0 -24   6    3.44    1.17 
   0 -24  -8    2.34    1.21 
   0  24   8    3.61    1.70 
   0 -24   8    3.83    1.40 
   0 -24   8    4.80    1.47 
   0  24  -8    2.46    1.52 
   0  25  -1   -0.32    0.80 
   0 -25   1   -0.17    0.59 
   0 -25  -1    0.67    0.79 
   0 -25  -1   -0.36    0.54 
   0 -25   1    0.41    0.66 
   0 -25   1    0.16    0.40 
   0  25   1    0.29    0.62 
   0 -25  -3   -1.08    0.60 
   0  25   3    0.31    0.75 
   0 -25   3    0.09    0.55 
   0  25  -3    0.32    0.95 
   0 -25   3    0.21    0.57 
   0 -25  -3    0.14    0.79 
   0 -25   3    0.42    0.74 
   0 -25  -5    0.93    0.96 
   0 -25   5   -0.05    0.86 
   0 -25   5    0.24    0.71 
   0  25  -5   -0.12    1.15 
   0  25   5    0.80    0.95 
   0 -25   7    0.05    0.99 
   0 -25  -7   -0.88    0.92 
   0  25   7   -0.90    1.16 
   0  25  -7   -0.36    1.23 
   0 -25   7    0.00    0.94 
   0 -26   0   32.28    1.89 
   0  26   0   28.33    1.91 
   0 -26   0   30.14    1.68 
   0 -26   0   30.21    1.20 
   0 -26   2   11.78    1.05 
   0 -26   2   13.00    1.27 
   0 -26   2   11.77    1.29 
   0 -26  -2   11.91    1.45 
   0 -26  -2   10.67    1.00 
   0  26   2   12.21    1.35 
   0  26  -2   10.56    1.53 
   0 -26  -4    0.95    0.92 
   0  26  -4   -0.48    1.07 
   0  26   4   -1.28    0.70 
   0 -26   4    0.69    0.66 
   0 -26   4    0.27    0.78 
   0 -26   6    1.47    0.99 
   0 -26  -6    0.81    1.02 
   0  26   6    0.32    1.01 
   0  26  -6    1.27    1.24 
   0 -26   6    0.18    0.93 
   0 -27  -1   -0.13    0.75 
   0 -27  -1   -0.29    0.53 
   0 -27   1    0.20    0.65 
   0  27  -1   -0.62    0.81 
   0  27   1    0.24    0.66 
   0 -27   1   -0.19    0.61 
   0 -27   1   -0.20    0.40 
   0 -27  -3    0.34    0.83 
   0 -27   3   -0.32    0.51 
   0 -27   3    0.60    0.79 
   0  27   3    0.85    0.78 
   0  27  -3   -0.11    0.98 
   0 -27   3    0.04    0.57 
   0  27  -5    1.14    1.23 
   0 -27  -5    1.01    0.97 
   0 -27   5    0.23    0.90 
   0  27   5   -0.80    0.88 
   0 -27   5    0.18    0.71 
   0  27  -7    0.89    1.52 
   0 -27   7   -0.52    0.90 
   0 -27   7    0.46    1.06 
   0 -27  -7    0.25    1.08 
   0  27   7   -0.75    1.23 
   0 -28   0   -0.63    0.67 
   0  28   0    0.11    0.84 
   0 -28   0   -0.14    0.58 
   0 -28  -2   27.07    1.94 
   0  28   2   24.93    1.79 
   0 -28   2   28.06    1.68 
   0 -28  -2   30.49    1.55 
   0 -28   2   29.70    1.91 
   0  28  -2   31.40    2.32 
   0 -28   2   29.54    1.51 
   0  28   4   16.13    1.78 
   0 -28   4   18.14    1.53 
   0 -28   4   16.52    1.81 
   0  28  -4   16.53    2.10 
   0 -28  -4   17.88    1.89 
   0 -28  -6    1.79    1.17 
   0 -28   6    0.67    0.87 
   0 -28   6    1.10    1.02 
   0  28  -6    0.10    1.38 
   0  28   6    1.78    1.19 
   0 -29  -1   -0.04    0.75 
   0 -29   1    0.98    0.78 
   0 -29   1    0.24    0.66 
   0  29  -1   -0.50    0.86 
   0 -29  -1   -0.44    0.57 
   0  29   1   -1.34    0.65 
   0 -29   3    0.00    0.57 
   0  29   3    0.29    0.81 
   0 -29  -3   -0.31    0.82 
   0  29  -3   -1.71    1.00 
   0 -29   3    0.18    0.69 
   0 -29   3   -0.09    0.61 
   0 -29   5   -0.99    0.62 
   0 -29  -5    0.95    0.98 
   0 -29   5   -2.08    0.70 
   0  29   5    0.86    1.04 
   0  29  -5   -0.05    1.33 
   0 -29   7    0.45    1.05 
   0 -30   0    3.94    1.07 
   0 -30   0    4.35    0.92 
   0  30   0    5.17    1.19 
   0  30   2   -0.39    0.76 
   0 -30  -2    0.44    0.86 
   0 -30  -2    0.24    0.85 
   0 -30   2    0.54    0.55 
   0 -30   2   -0.78    0.64 
   0 -30   2    0.69    0.70 
   0  30  -2   -0.14    1.02 
   0  30  -4    4.13    1.50 
   0 -30   4    2.79    0.87 
   0 -30  -4    2.19    1.15 
   0  30   4    3.95    1.21 
   0 -30   4    2.90    1.06 
   0 -30  -6    3.81    1.30 
   0  30  -6    3.76    1.75 
   0 -30   6    4.47    1.42 
   0  30   6    7.16    1.90 
   0 -30   6    4.17    1.20 
   0  31  -1   -0.27    1.01 
   0 -31   1   -0.01    0.77 
   0  31   1   -1.29    0.76 
   0 -31   1   -1.17    0.59 
   0 -31  -1   -0.87    0.56 
   0 -31  -1   -0.11    0.91 
   0  31  -3   -0.24    1.19 
   0  31   3   -0.79    0.88 
   0 -31   3    1.03    0.62 
   0 -31   3    0.00    0.77 
   0 -31  -3    2.35    1.05 
   0 -31   3   -0.16    0.78 
   0  31  -5   -0.13    1.39 
   0 -31   5    0.93    0.78 
   0 -31  -5   -1.54    0.92 
   0  31   5   -0.21    1.02 
   0 -31   5   -0.84    0.88 
   0 -32   0    2.00    0.98 
   0 -32   0    0.37    0.70 
   0  32   0    0.35    0.98 
   0 -32   2   14.45    1.51 
   0 -32   2   11.43    1.48 
   0  32   2   13.78    1.69 
   0  32  -2   13.72    1.95 
   0 -32  -2   13.85    1.77 
   0 -32   4   20.55    1.69 
   0 -32   4   16.99    1.96 
   0  32   4   20.34    2.27 
   0 -32  -4   17.16    1.97 
   0  32  -4   17.64    2.46 
   0 -32   6    1.37    0.93 
   0 -32  -6   -0.42    1.01 
   0  32   6    1.20    1.45 
   0  32  -6   -1.74    1.44 
   0 -32   6    0.34    1.12 
   0  33   1   -0.45    0.85 
   0 -33  -1    0.39    0.66 
   0 -33  -1    0.35    0.94 
   0 -33   1   -0.44    0.65 
   0  33  -1   -1.15    1.00 
   0 -33   1   -0.60    0.80 
   0  33   3    0.56    1.06 
   0 -33  -3   -0.67    0.92 
   0  33  -3   -0.53    1.27 
   0 -33   3   -0.02    0.84 
   0 -33   5    0.89    0.82 
   0 -33   5    0.27    0.99 
   0 -33  -5    0.01    1.02 
   0  33   5    0.62    1.18 
   0  33  -5   -1.28    1.47 
   0 -34   0    3.20    0.88 
   0 -34   0    4.64    1.24 
   0  34   0    4.51    1.36 
   0 -34   2    7.42    1.25 
   0  34   2    8.96    1.67 
   0 -34   2    8.43    1.35 
   0 -34  -2    9.77    1.58 
   0  34  -2    5.65    1.60 
   0 -34  -4   11.63    1.78 
   0 -34   4   13.72    1.52 
   0 -34   4   12.41    1.75 
   0  34   4   13.35    1.98 
   0  34  -4   10.97    2.07 
   0 -35  -1   -1.95    0.88 
   0  35   1   -0.82    1.02 
   0  35  -1   -1.39    1.13 
   0 -35   1    0.37    0.80 
   0 -35   1    0.14    0.91 
   0 -35  -3    0.77    1.11 
   0  35  -3    0.81    1.43 
   0  35   3   -1.50    1.01 
   0 -35   3   -0.11    0.82 
   0  36   0    0.56    1.20 
   0 -36   0   -0.74    0.66 
   0 -36   0    0.26    1.01 
   0  36  -2    5.77    1.75 
   0 -36   2    3.93    1.07 
   0 -36   2    5.49    1.22 
   0 -36  -2    4.38    1.41 
   0  36   2    4.96    1.44 
   0  36  -4    4.14    1.94 
   0 -36   4    1.80    1.09 
   0 -36  -4    3.64    1.41 
   0  36   4    2.19    1.41 
   0 -37   1    0.22    0.76 
   0 -37   1    0.13    0.95 
   0  37  -1   -0.92    1.17 
   0  37   1    1.39    1.18 
   0 -37  -1    0.10    1.04 
   0  37   3   -1.10    1.15 
   0  37  -3   -2.55    1.33 
   0 -37  -3    1.32    1.19 
   0 -37   3   -0.16    0.76 
   0  38   0    7.38    1.81 
   0 -38   0    4.54    1.36 
   0 -38   0    5.49    1.40 
   0  38   2    6.25    1.69 
   0  38  -2    6.41    1.92 
   0 -38   2    7.62    1.51 
   0 -38  -2    8.22    1.75 
   0 -38   2    7.52    1.39 
   0 -39   1   -0.26    1.06 
   0  39  -1   -0.95    1.28 
   0  39   1   -1.08    1.19 
   0 -39   1    0.06    0.77 
   0 -39  -1    2.78    1.39 
   0  40   0    0.52    1.31 
   0 -40   0   -0.50    1.11 
  -1   0   0    0.00    0.01 
  -1   0   0   -0.01    0.01 
   1   0   0    0.01    0.00 
   1   0   0    0.00    0.01 
   1   0   0    0.01    0.01 
   1   0   2   -0.20    0.31 
  -1   0   2   -0.59    0.35 
   1   0   2    0.05    0.48 
   1   0   2    0.10    0.33 
  -1   0   2   -0.47    0.33 
  -1   0   2   -0.36    0.45 
  -1   0  -2   -0.24    0.27 
  -1   0   2    0.11    0.24 
  -1   0   4    0.35    0.62 
  -1   0   4   -0.73    0.37 
   1   0   4   -0.36    0.56 
   1   0   4   -0.19    0.40 
  -1   0  -4   -0.14    0.30 
   1   0   4    0.52    0.46 
  -1   0   4   -0.51    0.43 
   1   0  -4    0.48    0.32 
  -1   0   6   -0.57    0.54 
  -1   0  -6   -0.36    0.37 
   1   0  -6    0.77    0.84 
   1   0   6   -0.18    0.51 
  -1   0  -6   -0.62    0.72 
   1   0   6    0.80    0.64 
  -1   0   6    0.04    0.53 
   1   0  -6    0.05    0.38 
   1   0  -8    0.14    1.01 
   1   0   8    0.60    0.78 
  -1   0   8   -0.07    0.66 
  -1   0  -8    2.22    1.16 
   1   0   8    0.45    0.64 
  -1   0   8    1.06    0.80 
   1   0 -10    3.62    1.35 
   1   0  10   -0.24    0.94 
  -1   0 -10    4.48    1.43 
  -1   0  10    0.61    0.91 
   1   1   1  148.93    3.30 
   1   1   1  146.07    3.11 
  -1  -1   1  144.77    3.07 
   1   1   1  152.20    3.18 
  -1   1  -1  154.83    3.32 
  -1  -1   1  145.33    3.22 
  -1   1  -1  143.57    3.07 
  -1  -1   1  147.45    3.23 
  -1  -1  -1  155.62    3.17 
  -1   1   1  149.11    3.17 
  -1   1   1  148.23    3.29 
   1  -1   1  148.57    3.22 
  -1   1   1  143.68    3.15 
   1  -1   1  151.06    3.19 
  -1  -1  -1  159.67    3.18 
   1   1  -1  146.74    3.08 
   1   1  -1  152.39    3.30 
  -1   1   1  148.80    3.18 
   1  -1   1  151.53    3.07 
   1  -1  -3   65.34    1.73 
   1   1   3   68.62    1.84 
  -1   1  -3   67.44    1.62 
  -1  -1   3   66.01    1.93 
   1   1   3   67.03    1.95 
  -1  -1   3   68.01    2.00 
   1   1   3   69.17    2.25 
  -1   1   3   68.55    1.87 
   1   1  -3   65.10    2.21 
   1   1  -3   66.43    1.62 
   1  -1   3   68.72    1.89 
  -1   1   3   67.10    1.95 
   1  -1   3   69.90    2.01 
  -1  -1  -3   68.90    1.73 
  -1   1   3   64.78    2.19 
  -1   1  -5   14.11    1.42 
   1  -1  -5   16.20    0.85 
  -1  -1   5   15.83    1.21 
   1   1   5   14.71    0.99 
   1   1   5   15.46    1.42 
   1   1   5   15.39    1.15 
  -1  -1   5   16.41    1.10 
  -1   1  -5   12.73    0.72 
   1  -1   5   16.70    1.22 
   1   1  -5   16.40    1.44 
   1  -1   5   16.56    1.10 
  -1   1   5   15.37    1.17 
  -1   1   5   15.54    1.43 
  -1  -1  -5   13.54    0.83 
  -1   1   5   15.98    1.04 
   1   1  -5   16.91    0.75 
  -1   1  -7    2.26    1.08 
   1  -1  -7    1.30    1.03 
   1   1   7    3.74    0.94 
  -1  -1   7    2.43    0.77 
  -1  -1   7    5.33    1.05 
   1   1   7    4.17    0.82 
  -1   1   7    2.85    0.85 
   1   1  -7    2.47    1.07 
   1  -1   7    3.15    0.91 
   1  -1   7    3.08    0.82 
  -1  -1  -7    4.00    1.19 
  -1   1   7    3.57    0.82 
   1  -1  -9    4.38    1.33 
   1   1   9    0.93    0.92 
  -1   1  -9    1.75    1.19 
  -1  -1   9    1.07    0.89 
  -1  -1   9    1.66    0.84 
   1   1  -9    3.95    1.34 
  -1   1   9    1.55    0.84 
   1  -1   9    1.79    1.00 
  -1  -1  -9    1.17    1.18 
  -1   1   9    0.72    0.84 
   1  -1   9    0.46    0.75 
   1   2   2  758.15   15.43 
  -1   2  -2  718.36   15.28 
  -1   2  -2  787.39   15.81 
   1   2   2  762.05   15.55 
  -1  -2   2  769.12   15.66 
  -1  -2   2  766.91   15.29 
  -1  -2   2  747.96   15.61 
   1   2   2  761.06   15.80 
   1  -2   2  763.07   15.59 
   1  -2   2  764.66   15.66 
  -1   2   2  764.35   15.51 
   1   2  -2  760.94   15.30 
  -1   2   2  764.11   15.78 
  -1  -2  -2  773.33   15.51 
  -1   2   2  777.26   15.56 
  -1   2   2  764.84   15.50 
   1  -2   2  781.11   15.29 
  -1   2  -4   19.40    0.74 
   1   2   4   22.02    1.01 
  -1  -2   4   21.22    1.22 
  -1  -2   4   24.12    1.20 
   1   2   4   22.21    1.45 
  -1   2  -4   20.42    1.42 
   1  -2  -4   21.54    0.95 
   1   2   4   21.09    1.13 
  -1   2   4   22.38    1.17 
   1   2  -4   21.50    0.74 
   1  -2   4   24.29    1.26 
  -1   2   4   23.94    1.46 
  -1   2   4   21.74    1.06 
   1  -2   4   22.26    1.15 
   1   2  -4   21.13    1.44 
  -1  -2  -4   22.28    0.97 
  -1   2  -6    0.89    0.43 
   1  -2  -6    0.75    0.46 
   1   2   6    0.74    0.55 
  -1  -2   6    0.33    0.60 
   1   2   6    0.66    0.79 
  -1  -2   6    0.55    0.66 
   1   2   6    1.55    0.67 
  -1   2  -6    1.02    0.95 
  -1  -2  -6    1.04    0.50 
   1  -2   6    0.39    0.60 
   1   2  -6    0.61    0.40 
   1  -2   6   -0.01    0.59 
  -1   2   6    1.44    0.58 
   1   2  -6    1.33    0.94 
  -1   2   6    1.43    0.67 
   1  -2  -8   14.26    1.91 
   1   2   8    8.41    1.13 
   1   2   8   13.16    1.52 
  -1  -2   8   12.21    1.41 
  -1  -2   8   12.46    1.52 
  -1   2  -8   15.34    2.08 
  -1  -2  -8   12.10    1.85 
  -1   2   8    9.88    1.33 
   1  -2   8   10.09    1.31 
  -1   2   8   13.55    1.34 
   1   2  -8   13.66    1.83 
   1  -2   8   11.66    1.53 
  -1   2 -10    4.47    1.57 
  -1  -2  10    0.27    1.00 
   1  -2 -10    9.44    1.80 
   1   2  10    2.79    1.06 
   1  -2  10    2.33    1.14 
  -1   2  10    2.38    1.09 
  -1  -2 -10    6.80    1.71 
   1   2 -10    3.47    1.36 
   1   3   1  221.94    4.68 
  -1  -3   1  214.12    4.66 
   1   3   1  225.78    4.49 
  -1   3  -1  223.98    4.67 
  -1  -3   1  225.38    4.65 
  -1   3  -1  214.04    4.43 
  -1  -3   1  208.26    4.45 
  -1   3   1  222.94    4.63 
   1  -3   1  220.90    4.44 
   1  -3   1  221.86    4.65 
   1  -3   1  219.42    4.64 
   1   3  -1  201.70    4.44 
  -1   3   1  211.36    4.52 
  -1   3   1  222.41    4.67 
  -1  -3  -1  221.79    4.64 
  -1   3   1  219.25    4.50 
   1   3  -1  226.78    4.66 
   1   3   3   19.71    1.25 
   1   3   3   20.50    0.96 
  -1  -3   3   18.59    1.05 
  -1   3  -3   19.66    1.28 
   1  -3  -3   20.84    0.93 
   1   3   3   20.85    0.84 
  -1  -3   3   18.99    1.08 
  -1   3   3   19.54    0.87 
   1  -3   3   20.61    1.03 
   1  -3   3   21.56    1.11 
  -1   3   3   21.65    1.26 
  -1   3   3   19.79    0.97 
   1   3  -3   20.13    1.28 
  -1  -3  -3   22.01    0.94 
  -1  -3   5   24.82    1.38 
  -1   3  -5   23.16    1.63 
  -1  -3   5   25.71    1.45 
   1   3   5   22.69    1.64 
   1  -3  -5   26.92    1.15 
   1   3   5   24.60    1.33 
   1   3   5   24.22    1.17 
  -1   3   5   27.77    1.37 
  -1   3   5   23.68    1.18 
  -1   3   5   25.54    1.68 
  -1  -3  -5   22.79    1.10 
   1  -3   5   25.42    1.38 
   1   3  -5   21.06    1.58 
   1  -3   5   24.85    1.43 
  -1   3  -7    1.74    1.10 
   1  -3  -7    0.52    0.95 
  -1  -3   7    1.22    0.73 
   1   3   7   -0.20    0.64 
   1   3   7    0.93    0.60 
  -1  -3   7    0.51    0.71 
  -1   3   7    0.60    0.59 
   1  -3   7    0.93    0.71 
  -1   3   7    0.81    0.70 
   1   3  -7    1.16    0.99 
   1  -3   7    0.60    0.74 
   1  -3  -9    4.05    1.37 
  -1   3  -9    2.44    1.23 
   1   3   9    2.22    1.00 
  -1  -3   9    1.78    1.01 
  -1  -3   9    3.40    1.01 
   1  -3   9    2.66    0.94 
   1   3  -9    3.95    1.57 
  -1   3   9    1.88    0.96 
  -1  -3  -9    4.67    1.50 
   1  -3   9    1.87    1.02 
  -1   4   0   64.79    1.51 
  -1  -4   0   66.21    1.48 
   1   4   0   66.10    1.41 
  -1   4   0   64.14    1.52 
  -1  -4   0   64.95    1.40 
   1  -4   0   63.14    1.42 
  -1  -4   0   63.53    1.53 
   1   4   0   64.90    1.53 
   1  -4  -2  401.36    8.26 
  -1   4  -2  394.29    8.41 
   1   4   2  391.59    8.01 
   1   4   2  392.89    8.13 
  -1  -4   2  394.12    8.33 
  -1  -4   2  389.64    8.34 
   1   4   2  382.96    8.42 
  -1   4   2  396.09    8.13 
   1  -4   2  392.58    8.35 
  -1   4   2  396.75    8.11 
   1  -4   2  389.17    8.30 
   1   4  -2  400.93    8.42 
  -1  -4  -2  398.88    8.25 
  -1   4   2  375.97    8.40 
   1   4   4   42.54    1.38 
  -1   4  -4   38.92    1.85 
   1   4   4   40.53    1.89 
  -1  -4   4   42.07    1.67 
  -1  -4   4   41.99    1.70 
   1  -4  -4   44.49    1.48 
   1   4   4   44.48    1.56 
  -1   4   4   45.14    1.47 
  -1   4   4   43.71    1.55 
  -1  -4  -4   44.48    1.49 
   1  -4   4   43.53    1.66 
   1  -4   4   46.27    1.75 
   1   4  -4   40.45    1.88 
  -1   4   4   45.28    1.95 
  -1   4  -6   21.62    1.78 
  -1  -4   6   24.68    1.52 
   1   4   6   21.37    1.20 
  -1  -4   6   23.80    1.58 
   1   4   6   19.76    1.72 
   1  -4  -6   20.70    1.16 
   1   4   6   20.92    1.40 
  -1   4   6   22.04    1.25 
   1   4  -6   20.76    1.75 
  -1   4   6   21.01    1.36 
   1  -4   6   20.83    1.45 
   1  -4   6   22.96    1.56 
  -1  -4  -6   21.00    1.18 
  -1   4   6   23.13    1.80 
   1  -4  -8    3.27    1.27 
  -1   4  -8    3.63    1.29 
   1   4   8    1.59    0.84 
   1   4   8    1.19    0.71 
  -1  -4   8    2.10    0.95 
  -1  -4   8    0.96    0.82 
  -1   4   8    1.34    0.81 
   1  -4   8    1.03    0.81 
  -1  -4  -8    3.79    1.39 
  -1   4   8    2.69    0.77 
   1   4  -8    2.33    1.17 
   1  -4   8    1.14    0.91 
  -1   4 -10    3.91    1.63 
   1   4  10    5.18    1.24 
   1  -4 -10    7.60    1.61 
  -1  -4  10    1.82    1.18 
  -1  -4  10    2.23    1.17 
   1  -4  10    3.10    1.15 
  -1   4  10    2.45    0.99 
   1   4 -10    5.29    1.54 
  -1  -5   1   57.98    1.54 
  -1   5  -1   52.84    1.50 
  -1   5  -1   57.77    1.32 
  -1  -5   1   52.95    1.31 
   1   5   1   57.19    1.49 
  -1  -5   1   57.69    1.48 
   1   5  -1   52.71    1.49 
   1  -5   1   55.43    1.52 
  -1  -5  -1   55.87    1.53 
  -1   5   1   56.42    1.53 
  -1   5   1   55.51    1.47 
   1  -5   1   55.04    1.48 
  -1   5   1   53.44    1.23 
   1   5   3   14.17    0.77 
  -1  -5   3   12.27    0.96 
   1   5   3   12.66    1.11 
  -1  -5   3   13.83    0.97 
   1   5   3   13.10    0.65 
  -1   5  -3   14.35    1.14 
   1  -5  -3   12.74    0.87 
   1  -5   3   16.69    1.00 
  -1   5   3   13.39    0.77 
  -1   5   3   13.89    0.72 
   1  -5   3   12.92    0.97 
  -1  -5  -3   11.54    0.85 
   1   5  -3   14.39    1.15 
  -1   5   3   14.55    1.14 
  -1   5  -5    2.28    0.87 
   1   5   5    4.02    0.69 
   1  -5  -5    4.02    0.63 
  -1  -5   5    4.35    0.83 
  -1  -5   5    3.18    0.74 
   1   5   5    4.92    1.01 
   1   5   5    4.14    0.57 
   1   5  -5    2.57    0.88 
  -1   5   5    4.37    0.69 
  -1   5   5    5.20    1.02 
   1  -5   5    4.90    0.79 
  -1  -5  -5    3.19    0.62 
   1  -5   5    3.59    0.81 
  -1   5   5    4.87    0.64 
  -1  -5   7    0.05    0.68 
   1  -5  -7    0.39    0.57 
   1   5   7    0.39    0.50 
   1   5   7    1.16    0.91 
  -1   5  -7    0.15    0.90 
   1   5   7   -0.09    0.59 
  -1  -5   7    0.82    0.76 
  -1   5   7   -0.47    0.85 
   1  -5   7   -0.37    0.67 
   1  -5   7   -0.84    0.59 
   1   5  -7   -0.46    0.96 
  -1   5   7    0.09    0.54 
  -1  -5  -7   -0.40    0.56 
  -1   5   7   -0.01    0.60 
   1   5   9    1.70    0.91 
  -1  -5   9    1.22    0.96 
   1  -5  -9    4.52    1.42 
  -1  -5   9    2.49    0.99 
  -1   5  -9    5.31    1.46 
  -1  -5  -9    4.23    1.42 
   1   5  -9    2.82    1.38 
   1  -5   9    2.35    0.95 
  -1   5   9    4.41    1.07 
   1  -5   9    3.15    1.12 
  -1  -6   0  272.39    5.69 
  -1   6   0  273.01    5.69 
  -1  -6   0  268.46    5.61 
   1  -6   0  253.87    5.52 
   1   6   0  270.10    5.70 
  -1  -6   0  277.35    5.50 
  -1   6   0  268.57    5.68 
  -1   6  -2  337.24    7.24 
   1   6   2  343.14    6.91 
  -1  -6   2  322.89    6.77 
   1   6   2  335.78    6.82 
   1  -6  -2  335.38    7.20 
  -1  -6   2  332.90    7.24 
  -1  -6   2  337.12    7.24 
   1   6   2  336.56    7.30 
  -1   6   2  334.85    6.93 
   1  -6   2  320.99    6.76 
  -1  -6  -2  339.59    7.20 
   1  -6   2  340.31    7.25 
  -1   6   2  329.09    7.27 
  -1   6   2  340.39    6.92 
   1  -6   2  330.81    7.22 
   1   6   4   56.13    1.77 
  -1  -6   4   54.64    2.01 
  -1  -6   4   53.20    2.00 
   1  -6  -4   53.11    1.80 
  -1   6  -4   57.36    2.20 
   1   6   4   56.61    1.60 
   1   6   4   55.49    2.20 
  -1   6   4   55.16    2.20 
   1   6  -4   55.22    2.18 
   1  -6   4   55.51    1.98 
  -1  -6  -4   55.31    1.83 
   1  -6   4   54.60    2.03 
  -1   6   4   56.34    1.76 
  -1   6   4   55.95    1.67 
  -1  -6   6   27.58    1.71 
   1   6   6   25.93    1.47 
   1  -6  -6   26.63    1.38 
  -1  -6   6   30.40    1.77 
  -1   6  -6   28.60    1.95 
   1   6   6   28.04    1.31 
   1   6   6   26.78    1.96 
  -1   6   6   29.19    1.98 
  -1   6   6   27.88    1.49 
   1   6  -6   27.23    1.93 
   1  -6   6   28.02    1.72 
   1  -6   6   30.51    1.74 
  -1   6   6   28.88    1.37 
  -1  -6  -6   27.47    1.42 
   1   6   8    1.64    0.79 
  -1   6  -8   -0.63    1.04 
  -1  -6   8    0.51    0.80 
  -1  -6   8   -0.29    0.84 
  -1   6   8    1.14    0.77 
   1  -6   8    0.39    0.81 
   1   6  -8    1.20    1.18 
   1  -6   8    0.72    0.88 
  -1  -7   1  223.69    4.93 
  -1   7  -1  221.67    4.88 
  -1  -7   1  228.82    4.76 
   1   7   1  227.08    4.87 
  -1  -7   1  228.08    4.87 
   1  -7  -1  220.95    4.58 
   1  -7   1  223.51    4.87 
   1   7  -1  213.70    4.89 
  -1   7   1  224.43    4.97 
  -1  -7  -1  229.96    4.97 
  -1   7   1  227.95    4.86 
   1  -7   1  225.60    4.94 
   1   7   3   13.81    0.74 
  -1   7  -3   12.64    1.14 
   1   7   3   13.67    0.61 
   1   7   3   15.59    1.14 
  -1  -7   3   13.80    1.01 
  -1  -7   3   14.99    1.06 
   1  -7  -3   14.60    0.97 
   1  -7   3   16.20    1.09 
  -1   7   3   14.66    1.12 
   1  -7   3   14.60    1.02 
  -1   7   3   13.91    0.71 
  -1   7   3   13.96    0.74 
  -1  -7  -3   13.57    0.94 
   1   7  -3   14.32    1.15 
  -1  -7   5    2.32    0.74 
   1  -7  -5    2.34    0.61 
  -1  -7   5    2.52    0.72 
   1   7   5    2.07    0.49 
   1   7   5    3.39    0.91 
  -1   7  -5    2.78    0.92 
   1   7   5    1.83    0.55 
   1  -7   5    2.97    0.72 
  -1   7   5    1.99    0.82 
   1   7  -5    2.44    0.89 
  -1  -7  -5    1.89    0.63 
  -1   7   5    1.92    0.56 
   1  -7   5    1.79    0.66 
  -1   7   5    2.07    0.52 
   1   7   7    1.03    0.66 
   1   7   7    2.09    0.59 
  -1   7  -7    2.38    1.11 
   1  -7  -7    1.64    0.69 
  -1  -7   7    2.17    0.89 
  -1  -7   7    0.77    0.72 
   1   7   7    1.69    1.01 
   1  -7   7    1.60    0.89 
  -1   7   7    1.68    0.60 
  -1   7   7    1.20    0.65 
   1   7  -7    2.07    1.10 
  -1   7   7    2.41    1.07 
   1  -7   7    2.08    0.88 
  -1  -7  -7    1.11    0.69 
  -1   7  -9    2.83    1.39 
  -1  -7   9    0.92    1.09 
   1  -7  -9    5.00    1.50 
  -1  -7   9    0.93    0.92 
   1   7   9    1.89    0.87 
  -1  -7  -9    2.07    1.27 
  -1   7   9    1.61    0.82 
   1  -7   9    0.59    0.90 
   1   7  -9    3.34    1.38 
   1  -7   9    1.98    1.14 
  -1  -8   0   12.02    0.75 
  -1  -8   0   13.65    0.73 
   1   8   0   14.47    0.81 
  -1   8   0   13.02    0.77 
   1  -8   0   13.69    0.60 
  -1  -8   0   14.21    0.55 
  -1  -8   2   36.71    1.04 
  -1   8  -2   39.38    1.44 
  -1  -8   2   40.89    1.49 
   1   8   2   42.23    1.49 
  -1  -8   2   38.31    1.40 
   1  -8  -2   40.59    1.44 
   1  -8   2   39.80    1.43 
  -1   8   2   37.55    1.03 
   1  -8   2   39.29    1.03 
  -1  -8  -2   40.79    1.48 
   1   8  -2   39.66    1.46 
  -1   8   2   37.79    1.45 
   1  -8   2   40.14    1.48 
   1   8   4  139.60    3.10 
  -1  -8   4  130.66    3.65 
   1   8   4  133.17    3.27 
   1   8   4  132.26    3.89 
  -1   8  -4  136.36    3.79 
  -1  -8   4  133.49    3.70 
   1  -8  -4  131.01    3.50 
  -1  -8  -4  130.17    3.50 
  -1   8   4  136.40    3.20 
  -1   8   4  134.47    3.89 
  -1   8   4  134.50    3.27 
   1  -8   4  129.86    3.69 
   1  -8   4  139.75    3.72 
   1   8  -4  136.90    3.79 
  -1   8  -6    4.46    1.21 
   1   8   6    3.94    0.62 
  -1  -8   6    3.75    0.91 
  -1  -8   6    5.89    1.03 
   1   8   6    3.97    0.75 
   1  -8  -6    4.47    0.79 
   1   8   6    5.27    1.14 
   1  -8   6    4.56    0.97 
  -1   8   6    4.59    0.68 
  -1  -8  -6    3.51    0.78 
  -1   8   6    3.90    0.73 
  -1   8   6    4.47    1.07 
   1  -8   6    4.32    0.95 
   1   8  -6    4.12    1.15 
  -1   8  -8    3.93    1.34 
   1   8   8    2.52    0.83 
   1   8   8    0.86    1.12 
  -1  -8   8    4.24    1.14 
  -1  -8   8    2.35    1.07 
   1   8  -8    2.15    1.15 
   1  -8   8    3.08    1.02 
   1  -8   8    1.94    1.01 
  -1   8   8    3.33    1.39 
  -1   8   8    2.69    0.85 
  -1  -9   1   23.06    0.90 
   1   9   1   25.68    1.02 
  -1   9  -1   26.34    1.08 
  -1  -9   1   24.64    1.10 
  -1  -9   1   25.25    0.99 
   1  -9  -1   25.08    1.12 
  -1  -9  -1   25.50    1.12 
   1  -9   1   25.45    1.00 
  -1   9   1   25.41    0.99 
   1  -9   1   24.13    1.09 
   1  -9   1   26.09    0.93 
   1  -9  -3    1.01    0.51 
  -1  -9   3    1.75    0.60 
  -1  -9   3    1.52    0.51 
   1   9   3    0.88    0.31 
   1   9   3    1.05    0.59 
  -1   9  -3    1.50    0.69 
  -1   9   3    1.29    0.35 
   1  -9   3    1.45    0.54 
   1   9  -3    1.61    0.65 
  -1   9   3    1.17    0.32 
   1  -9   3    2.95    0.60 
  -1  -9  -3    1.56    0.56 
  -1   9   3    1.85    0.63 
  -1  -9   5   25.03    1.57 
  -1  -9   5   25.00    1.53 
   1   9   5   24.28    1.72 
   1  -9  -5   22.47    1.35 
   1   9   5   21.55    1.15 
  -1   9  -5   26.62    1.75 
   1   9   5   25.97    1.03 
   1  -9   5   30.42    1.64 
   1  -9   5   25.23    1.55 
  -1   9   5   25.29    1.19 
  -1  -9  -5   21.37    1.35 
   1   9  -5   28.13    1.77 
  -1   9   5   26.51    1.13 
  -1   9   5   25.10    1.72 
  -1   9  -7   -0.26    1.04 
   1  -9  -7    0.52    0.69 
   1   9   7   -0.22    0.81 
  -1  -9   7    0.85    0.82 
   1   9   7    0.84    0.62 
  -1  -9   7    0.94    0.80 
  -1  -9  -7   -0.91    0.62 
  -1   9   7    0.84    0.51 
   1   9  -7    0.80    1.01 
   1  -9   7    0.49    0.79 
  -1   9   7    1.14    0.67 
   1  -9   7    1.37    0.88 
  -1   9   7    1.33    1.04 
  -1  -9   9    1.72    1.09 
  -1  -9   9    1.73    1.11 
   1   9   9    2.02    0.89 
  -1   9  -9    4.06    1.34 
   1  -9   9    1.27    0.98 
   1  -9   9    1.10    1.05 
  -1   9   9    3.32    0.96 
   1   9  -9    1.75    1.30 
  -1 -10   0   69.15    1.93 
   1  10   0   70.36    1.95 
  -1 -10   0   69.09    1.63 
   1 -10   0   67.80    1.67 
   1 -10   0   70.97    1.93 
  -1 -10   0   66.72    1.81 
  -1  10   0   65.75    1.91 
  -1 -10   2   93.35    2.51 
  -1  10  -2   94.28    2.52 
  -1 -10   2   90.78    2.58 
   1 -10  -2   94.87    2.60 
  -1 -10   2   88.87    2.17 
   1  10   2   93.96    2.57 
  -1 -10  -2   92.18    2.57 
   1  10  -2   91.48    2.52 
   1 -10   2   89.57    2.57 
   1 -10   2   91.43    2.51 
   1 -10   2   91.83    2.17 
  -1  10   2   93.05    2.55 
  -1 -10   4  187.51    4.73 
   1 -10  -4  177.39    4.56 
   1  10   4  180.13    4.90 
   1  10   4  189.19    4.01 
   1  10   4  181.85    4.15 
  -1 -10   4  180.91    4.74 
  -1  10  -4  179.37    4.72 
   1  10  -4  176.88    4.70 
  -1  10   4  187.34    4.17 
  -1  10   4  184.53    4.13 
  -1 -10  -4  182.34    4.58 
   1 -10   4  183.78    4.72 
   1 -10   4  173.82    4.69 
  -1  10   4  185.24    4.93 
   1  10   6   54.34    1.96 
   1  10   6   56.46    1.76 
  -1 -10   6   56.29    2.51 
  -1 -10   6   54.62    2.44 
   1  10   6   55.93    2.71 
  -1  10  -6   54.98    2.59 
   1 -10  -6   52.50    2.16 
   1  10  -6   52.52    2.60 
  -1  10   6   52.35    1.94 
   1 -10   6   58.67    2.48 
   1 -10   6   52.84    2.40 
  -1 -10  -6   57.83    2.25 
  -1  10   6   61.06    1.90 
  -1  10   6   55.39    2.69 
  -1  10  -8    8.39    1.50 
   1  10   8    9.40    1.83 
  -1 -10   8    7.64    1.37 
  -1 -10   8    6.21    1.26 
   1  10   8   10.27    1.19 
  -1  10   8   11.35    1.26 
   1 -10   8    9.91    1.57 
   1 -10   8    9.95    1.53 
  -1  10   8    7.29    1.62 
   1  10  -8   11.53    1.77 
  -1 -11   1  153.76    3.53 
  -1  11  -1  148.31    3.68 
  -1 -11   1  152.90    3.53 
  -1 -11   1  148.22    3.65 
   1 -11  -1  157.62    3.77 
   1  11   1  151.90    3.61 
   1 -11   1  149.50    3.66 
   1 -11   1  159.07    3.55 
  -1  11   1  152.88    3.59 
   1  11  -1  147.30    3.68 
   1 -11   1  152.14    3.54 
  -1 -11  -1  152.66    3.73 
   1  11   3    1.03    0.56 
  -1  11  -3    0.56    0.66 
   1  11   3    1.05    0.26 
  -1 -11   3    0.00    0.50 
  -1 -11   3    1.32    0.53 
  -1 -11   3    0.39    0.26 
   1 -11  -3   -0.04    0.55 
   1 -11   3    1.22    0.26 
  -1  11   3    0.68    0.29 
   1  11  -3   -0.11    0.58 
   1 -11   3    2.10    0.61 
   1 -11   3    0.62    0.51 
  -1  11   3    1.30    0.62 
  -1 -11  -3    0.50    0.57 
  -1 -11   5   37.89    1.86 
   1  11   5   34.88    1.34 
   1  11   5   36.20    1.20 
   1 -11  -5   31.76    1.65 
  -1  11  -5   35.48    1.95 
  -1 -11   5   38.35    1.93 
   1  11   5   35.57    2.04 
  -1  11   5   34.80    1.30 
   1 -11   5   35.02    1.83 
   1  11  -5   34.84    1.94 
  -1  11   5   35.70    1.36 
   1 -11   5   36.36    1.92 
  -1 -11  -5   32.18    1.66 
  -1  11   5   34.75    2.01 
  -1 -11   7   28.82    2.03 
   1  11   7   27.91    2.20 
   1 -11  -7   24.08    1.57 
   1  11   7   24.89    1.41 
  -1  11  -7   24.24    2.07 
  -1 -11   7   21.03    1.81 
  -1  11   7   24.13    2.11 
   1 -11   7   21.76    1.88 
   1  11  -7   25.54    2.11 
   1 -11   7   21.61    1.80 
  -1 -11  -7   25.50    1.69 
  -1  11   7   22.83    1.41 
  -1  11  -9    4.88    1.47 
  -1 -11   9    2.13    1.09 
   1  11   9    1.32    1.38 
  -1 -11   9    3.34    1.29 
   1 -11   9    2.54    1.13 
  -1  11   9    2.49    1.47 
   1 -11   9    2.53    1.30 
   1  11  -9    2.59    1.34 
   1  12   0   38.32    1.45 
   1 -12   0   38.68    1.44 
  -1  12   0   37.11    1.43 
   1 -12   0   37.81    1.13 
  -1 -12   0   38.40    1.09 
  -1 -12   0   37.85    1.31 
  -1 -12   0   39.17    1.44 
  -1 -12   2   18.40    1.02 
  -1 -12   2   18.12    1.13 
   1 -12  -2   15.62    1.10 
   1  12   2   17.60    1.04 
  -1 -12   2   17.09    0.80 
  -1  12  -2   17.73    1.13 
   1  12  -2   18.49    1.16 
   1 -12   2   17.68    1.01 
   1 -12   2   16.10    1.13 
   1 -12   2   16.37    0.78 
  -1  12   2   17.35    1.05 
  -1 -12  -2   15.44    1.13 
  -1  12  -4   12.51    1.26 
   1  12   4   12.07    1.26 
  -1 -12   4   11.43    1.13 
   1  12   4   10.95    0.67 
   1 -12  -4   14.88    1.20 
  -1 -12   4   13.02    1.22 
   1  12  -4   11.93    1.23 
   1 -12   4   12.18    1.13 
  -1 -12  -4   11.27    1.09 
   1 -12   4   11.75    1.16 
  -1  12   4   11.85    1.24 
  -1  12   4   12.83    0.70 
   1 -12  -6   33.48    1.78 
   1  12   6   33.16    2.18 
  -1 -12   6   31.00    1.92 
   1  12   6   34.57    1.45 
  -1  12  -6   31.24    2.10 
  -1 -12   6   36.34    2.08 
  -1  12   6   37.43    1.42 
  -1  12   6   32.90    1.45 
   1 -12   6   30.63    1.91 
   1  12  -6   34.97    2.16 
   1 -12   6   34.34    1.99 
  -1 -12  -6   34.99    1.82 
  -1  12   6   34.81    2.20 
   1 -12  -8    5.88    1.15 
   1  12   8    5.27    1.51 
   1  12   8    7.46    1.34 
  -1 -12   8    5.81    1.33 
  -1 -12   8    7.19    1.46 
  -1  12  -8    7.86    1.66 
   1  12  -8    8.14    1.58 
   1 -12   8    7.32    1.45 
  -1 -12  -8    7.34    1.19 
  -1  12   8    7.05    1.65 
  -1  12   8    7.80    1.08 
   1 -12   8    7.52    1.40 
   1  13   1   32.17    1.33 
  -1 -13   1   32.39    1.24 
  -1  13  -1   34.87    1.46 
  -1 -13   1   31.87    1.19 
   1 -13  -1   32.15    1.43 
  -1 -13   1   29.47    1.35 
   1  13  -1   31.16    1.42 
  -1  13   1   35.76    1.35 
   1 -13   1   33.95    1.26 
  -1 -13  -1   34.44    1.44 
   1 -13   1   35.10    1.24 
   1 -13   1   31.68    1.37 
  -1 -13  -1   33.92    1.16 
  -1 -13   3   17.38    0.75 
  -1  13  -3   19.06    1.29 
   1 -13  -3   18.58    1.24 
   1  13   3   17.83    1.24 
  -1 -13   3   18.52    1.27 
  -1 -13   3   17.34    1.14 
   1 -13   3   21.29    1.31 
  -1  13   3   18.42    1.23 
   1  13  -3   20.66    1.32 
  -1 -13  -3   18.23    1.28 
   1 -13   3   18.06    0.73 
  -1  13   3   18.59    0.66 
   1 -13   3   17.54    1.16 
  -1 -13   5    1.27    0.73 
  -1  13  -5    0.58    0.78 
   1  13   5    0.99    0.40 
  -1 -13   5    0.48    0.65 
   1  13   5    0.85    0.74 
   1 -13  -5    1.36    0.70 
  -1  13   5    0.60    0.41 
   1 -13   5    0.47    0.69 
   1 -13   5    0.56    0.64 
  -1 -13  -5   -0.07    0.64 
  -1  13   5    1.09    0.82 
   1  13  -5    0.13    0.73 
   1 -13  -7    2.42    0.87 
  -1  13  -7    1.49    1.06 
  -1 -13   7    1.65    0.90 
  -1 -13   7    1.87    0.93 
   1  13   7    1.82    0.63 
   1  13   7    0.69    0.98 
   1 -13   7    0.96    0.90 
   1  13  -7    1.60    1.07 
  -1  13   7    1.86    0.64 
  -1  13   7    0.39    1.04 
   1 -13   7    0.29    0.82 
  -1 -13  -7   -0.06    0.77 
  -1  13  -9    6.10    1.64 
  -1 -13   9    0.45    0.97 
   1  13   9    1.88    1.40 
  -1 -13   9   -0.71    0.97 
   1 -13   9    1.68    1.08 
   1 -13   9    1.07    1.15 
   1  13  -9    2.26    1.37 
  -1  13   9   -0.25    1.30 
  -1 -14   0    9.91    0.81 
  -1 -14   0    8.63    0.53 
   1 -14   0    6.23    0.69 
   1 -14   0    5.67    0.56 
  -1 -14   0    6.91    0.75 
   1  14   0    7.80    0.84 
   1 -14   0    6.41    0.73 
  -1  14   0    6.17    0.79 
  -1  14  -2   80.96    2.48 
  -1 -14   2   80.05    2.48 
   1  14   2   78.57    2.39 
  -1 -14   2   79.69    2.33 
  -1 -14   2   79.12    2.13 
   1 -14  -2   78.17    2.49 
   1 -14   2   78.58    2.47 
   1  14  -2   77.86    2.47 
  -1 -14  -2   82.54    2.53 
   1 -14   2   76.86    2.32 
  -1  14   2   81.00    2.39 
   1 -14   2   79.76    2.12 
   1  14   4    4.25    0.89 
  -1 -14   4    3.79    0.83 
   1 -14  -4    3.39    0.75 
  -1  14  -4    2.22    0.89 
   1  14   4    4.95    0.44 
  -1 -14   4    2.91    0.74 
   1 -14   4    2.98    0.74 
  -1  14   4    4.32    0.94 
  -1 -14  -4    4.88    0.88 
  -1  14   4    4.46    0.46 
   1 -14   4    4.09    0.84 
   1  14  -4    4.08    0.94 
   1  14   6    6.51    1.32 
  -1 -14   6    6.61    1.14 
   1  14   6    6.81    0.73 
   1 -14  -6    4.13    0.92 
  -1 -14   6    5.14    1.05 
  -1  14  -6    4.51    1.18 
  -1  14   6    5.90    0.73 
   1 -14   6    5.32    1.09 
   1  14  -6    5.79    1.18 
  -1  14   6    3.22    1.06 
   1 -14   6    3.96    1.00 
  -1 -14  -6    6.33    1.07 
  -1  14  -8   29.40    2.45 
  -1 -14   8   29.91    2.35 
  -1 -14   8   27.10    2.29 
   1 -14  -8   29.18    2.00 
   1  14   8   26.78    2.55 
   1 -14   8   29.13    2.37 
   1 -14   8   28.27    2.36 
  -1 -14  -8   30.58    2.07 
  -1  14   8   32.63    2.73 
   1  14  -8   31.55    2.43 
  -1 -15   1   40.97    1.39 
   1 -15  -1   41.98    1.68 
  -1  15  -1   41.96    1.74 
  -1 -15   1   40.10    1.58 
   1  15   1   41.58    1.59 
  -1 -15   1   41.85    1.51 
  -1 -15  -1   45.98    1.74 
   1 -15   1   43.36    1.52 
  -1  15   1   41.52    1.59 
   1 -15   1   41.08    1.63 
   1  15  -1   40.35    1.72 
  -1 -15  -1   41.26    1.39 
   1 -15   1   41.59    1.42 
   1 -15  -3   -0.30    0.54 
  -1  15  -3    0.75    0.72 
  -1 -15   3   -0.04    0.55 
  -1 -15   3    0.23    0.32 
  -1 -15   3   -0.16    0.47 
   1  15   3   -0.18    0.50 
  -1 -15  -3    0.85    0.61 
   1 -15   3    0.22    0.50 
   1  15  -3    0.21    0.69 
   1 -15   3   -0.49    0.52 
  -1  15   3    0.26    0.53 
   1 -15   3    0.41    0.33 
   1 -15  -5    8.18    1.10 
  -1 -15   5    7.98    1.11 
   1  15   5   10.17    1.42 
  -1  15  -5   11.60    1.45 
   1  15   5   10.09    0.68 
  -1 -15   5    8.57    1.17 
  -1 -15  -5    8.19    1.11 
  -1  15   5   10.92    1.46 
   1 -15   5    9.65    1.23 
   1 -15   5    9.52    1.23 
  -1  15   5   10.23    0.73 
   1  15  -5   10.23    1.31 
   1  15   7    4.60    1.32 
   1 -15  -7    4.48    1.04 
  -1  15  -7    5.00    1.33 
  -1 -15   7    3.31    1.06 
  -1 -15   7    2.83    1.03 
  -1 -15  -7    4.01    1.03 
  -1  15   7    5.79    1.43 
   1 -15   7    4.67    1.18 
   1  15  -7    4.66    1.21 
   1 -15   7    3.65    1.09 
  -1 -15   9    0.73    1.08 
  -1 -15   9    2.15    1.23 
  -1  15  -9    4.00    1.33 
   1  15   9    2.92    1.61 
  -1  15   9   -0.38    1.33 
   1 -15   9    3.33    1.38 
   1  15  -9    3.20    1.27 
   1 -15   9    0.55    1.03 
  -1 -16   0   45.43    1.30 
  -1 -16   0   46.42    1.63 
  -1 -16   0   46.33    1.74 
   1 -16   0   47.89    1.79 
   1 -16   0   47.91    1.67 
   1  16   0   47.66    1.82 
   1 -16   0   44.55    1.36 
  -1  16   0   47.93    1.81 
   1  16   2   32.97    1.46 
  -1  16  -2   30.85    1.60 
  -1 -16   2   31.63    1.53 
  -1 -16   2   28.95    1.22 
  -1 -16   2   33.00    1.38 
   1 -16  -2   30.72    1.57 
  -1  16   2   30.33    1.41 
  -1 -16  -2   28.71    1.54 
   1 -16   2   30.28    1.22 
   1 -16   2   30.21    1.36 
   1 -16   2   31.08    1.56 
   1  16  -2   31.74    1.62 
   1  16   4    5.45    1.06 
   1 -16  -4    7.22    1.01 
  -1  16  -4    7.42    1.12 
  -1 -16   4    7.15    0.99 
  -1 -16   4    6.38    1.00 
   1 -16   4    7.43    0.49 
   1 -16   4    8.06    1.08 
  -1  16   4    8.26    1.20 
  -1 -16  -4    8.39    1.09 
   1 -16   4    6.01    0.95 
   1  16  -4    6.19    1.08 
   1 -16  -6    3.19    0.91 
   1  16   6    4.76    1.32 
  -1  16  -6    3.64    1.10 
  -1 -16   6    4.08    1.05 
  -1 -16   6    3.63    1.01 
   1  16  -6    4.15    1.22 
   1 -16   6    3.59    1.00 
  -1  16   6    3.12    1.10 
   1 -16   6    3.74    0.99 
  -1 -16  -6    3.87    0.97 
   1  16   8   12.05    2.12 
   1 -16  -8   11.80    1.52 
  -1 -16   8    9.47    1.65 
  -1 -16   8   11.29    1.76 
  -1  16  -8   10.83    1.71 
  -1 -16  -8   11.65    1.52 
   1 -16   8    9.01    1.60 
   1 -16   8   10.80    1.76 
  -1  16   8   11.54    1.95 
   1  16  -8    8.41    1.59 
  -1 -17   1   15.26    1.04 
  -1 -17   1   17.93    1.16 
   1  17   1   16.41    1.15 
  -1 -17   1   17.34    0.92 
  -1  17  -1   18.15    1.32 
   1 -17  -1   17.48    1.21 
   1 -17   1   17.80    1.18 
  -1 -17  -1   18.36    1.24 
   1 -17   1   15.36    0.91 
  -1 -17  -1   17.37    0.97 
  -1  17   1   17.59    1.15 
   1 -17   1   16.63    1.05 
   1  17  -1   17.41    1.30 
   1  17   3   12.29    1.15 
  -1 -17   3   11.25    1.04 
  -1 -17   3    8.80    0.75 
  -1  17  -3   11.93    1.33 
   1 -17  -3   11.43    1.19 
  -1 -17   3   11.10    1.21 
   1  17  -3   12.16    1.33 
  -1  17   3   10.19    1.11 
   1 -17   3   10.35    1.04 
   1 -17   3   10.46    0.76 
   1 -17   3   10.47    1.13 
  -1 -17  -3   11.55    1.18 
  -1 -17   5   14.87    1.52 
   1 -17  -5   13.82    1.40 
   1  17   5   14.45    1.56 
  -1  17  -5   15.62    1.64 
  -1 -17   5   14.87    1.47 
   1  17  -5   14.55    1.62 
  -1  17   5   16.75    1.04 
  -1 -17  -5   14.71    1.43 
  -1  17   5   16.74    1.61 
   1 -17   5   15.63    1.43 
   1 -17   5   16.20    1.57 
  -1  17  -7    0.45    1.06 
   1 -17  -7   -0.22    0.74 
   1  17   7   -0.68    0.89 
  -1 -17   7   -0.15    0.96 
  -1 -17   7    0.51    0.91 
   1 -17   7    0.41    0.96 
   1  17  -7    0.77    1.09 
   1 -17   7    0.03    0.87 
  -1 -17  -7    0.82    0.87 
  -1  17   7    0.49    1.06 
  -1 -17   9    4.96    1.47 
  -1 -17   9    4.09    1.36 
  -1  17  -9    5.83    1.67 
   1  17   9    4.26    1.71 
  -1  17   9    3.95    1.61 
   1 -17   9    4.02    1.46 
   1 -17   9    4.17    1.43 
   1  17  -9    4.65    1.50 
   1 -18   0    9.97    0.66 
  -1 -18   0   11.17    0.94 
   1 -18   0    9.53    0.96 
  -1 -18   0   10.02    0.61 
  -1 -18   0   10.69    1.02 
   1 -18   0   10.89    1.01 
   1  18   0   13.95    1.20 
  -1  18   0   11.05    1.16 
  -1 -18   2    5.28    0.85 
  -1 -18   2    5.52    0.70 
  -1  18  -2    6.02    0.97 
   1  18   2    7.51    0.91 
  -1 -18   2    6.12    0.75 
   1 -18  -2    7.14    1.01 
  -1 -18  -2    6.51    0.63 
   1 -18   2    5.08    0.71 
   1  18  -2    6.08    0.98 
  -1 -18  -2    6.74    1.00 
   1 -18   2    6.41    0.91 
   1 -18   2    5.71    0.69 
  -1  18   2    6.51    0.87 
  -1 -18   4   22.41    1.51 
   1 -18  -4   23.32    1.59 
  -1 -18   4   23.69    1.71 
  -1  18  -4   22.00    1.66 
  -1 -18   4   23.51    0.95 
   1  18   4   22.83    1.62 
   1  18  -4   24.43    1.76 
   1 -18   4   25.65    1.69 
  -1 -18  -4   25.48    1.66 
   1 -18   4   22.23    0.91 
  -1  18   4   23.64    1.65 
   1 -18   4   20.50    1.48 
  -1 -18   6    9.09    1.36 
   1 -18  -6    8.11    1.20 
  -1 -18   6    7.92    1.31 
  -1  18  -6    7.17    1.36 
   1  18   6    7.66    1.41 
   1  18  -6    6.43    1.40 
   1 -18   6    6.69    1.19 
  -1 -18  -6    8.59    1.25 
   1 -18   6    7.22    1.24 
  -1  18   6    6.88    1.41 
  -1 -18   8    5.36    1.43 
  -1  18  -8    3.39    1.38 
   1  18   8    5.50    1.75 
   1 -18  -8    3.98    1.20 
  -1 -18   8    4.48    1.25 
   1 -18   8    4.81    1.49 
   1  18  -8    2.58    1.28 
   1 -18   8    7.28    1.57 
  -1  18   8    4.08    1.48 
  -1 -18  -8    3.64    1.19 
   1 -19  -1   17.34    1.33 
   1  19   1   15.66    1.21 
  -1 -19   1   18.85    0.96 
  -1 -19   1   18.87    1.26 
  -1  19  -1   18.09    1.42 
   1 -19  -1   17.78    1.12 
  -1 -19   1   18.51    1.17 
   1 -19   1   18.75    1.16 
  -1  19   1   17.22    1.23 
   1 -19   1   18.00    0.99 
  -1 -19  -1   17.18    1.28 
  -1 -19  -1   19.63    1.06 
   1  19  -1   17.86    1.42 
   1 -19   1   16.10    1.25 
  -1  19  -3    4.36    1.01 
  -1 -19   3    4.58    0.78 
  -1 -19   3    5.93    0.70 
  -1 -19   3    5.08    0.95 
   1  19   3    4.94    0.96 
   1 -19  -3    4.98    0.91 
  -1 -19  -3    4.53    0.97 
   1 -19   3    4.25    0.90 
   1  19  -3    7.10    1.15 
   1 -19   3    5.43    0.84 
  -1  19   3    6.37    1.02 
   1 -19   3    5.78    0.68 
  -1  19  -5    7.31    1.33 
   1 -19  -5    6.26    1.09 
  -1 -19   5    6.88    1.10 
  -1 -19   5    6.49    1.14 
   1  19   5    5.38    1.15 
   1 -19   5    6.40    1.06 
   1 -19   5    6.84    1.20 
   1  19  -5    6.78    1.23 
  -1  19   5    5.37    1.16 
  -1 -19  -5    6.32    1.13 
  -1 -19   7    6.41    1.41 
  -1 -19   7    3.50    1.16 
  -1  19  -7    5.52    1.39 
   1  19   7    7.75    1.68 
   1 -19  -7    5.25    1.21 
  -1 -19  -7    4.63    1.18 
   1  19  -7    5.65    1.35 
  -1  19   7    4.90    1.56 
   1 -19   7    5.76    1.29 
   1 -19   7    6.64    1.41 
   1 -20   0   33.67    1.56 
  -1  20   0   36.83    1.79 
   1 -20   0   36.00    1.66 
  -1 -20   0   38.27    1.18 
   1  20   0   36.58    1.81 
  -1 -20   0   35.94    1.72 
  -1 -20   0   36.89    1.55 
   1 -20   0   35.13    1.22 
  -1 -20   2    4.19    0.71 
  -1 -20   2    4.24    0.69 
   1 -20  -2    2.98    0.81 
  -1  20  -2    2.28    0.87 
   1  20   2    4.92    0.84 
  -1 -20   2    4.66    0.80 
  -1  20   2    5.35    0.89 
   1 -20   2    5.71    0.93 
   1 -20   2    4.32    0.68 
   1 -20   2    4.41    0.72 
  -1 -20  -2    4.28    0.60 
   1  20  -2    3.51    0.91 
  -1 -20  -2    2.63    0.83 
  -1 -20   4   17.64    1.61 
   1 -20  -4   17.17    1.52 
  -1 -20   4   20.81    1.01 
  -1  20  -4   19.34    1.77 
  -1 -20   4   20.41    1.48 
   1  20   4   19.02    1.58 
   1 -20   4   19.13    1.00 
   1 -20   4   16.08    1.54 
   1 -20   4   21.33    1.49 
  -1  20   4   20.17    1.58 
   1  20  -4   20.29    1.82 
  -1 -20  -4   17.56    1.62 
   1  20   6   11.90    1.72 
   1 -20  -6    6.71    1.23 
  -1 -20   6    9.95    1.45 
  -1 -20   6    9.79    1.39 
  -1  20  -6    8.86    1.46 
  -1 -20  -6    8.80    1.40 
  -1  20   6    8.35    1.52 
   1  20  -6    7.11    1.34 
   1 -20   6    9.49    1.44 
   1 -20   6    8.03    1.34 
   1 -20  -8    2.74    1.14 
  -1  20  -8    1.67    1.36 
  -1 -20   8    3.04    1.27 
   1  20   8    3.46    1.50 
  -1 -20   8    2.34    1.17 
  -1 -20  -8    4.58    1.30 
  -1  20   8    2.08    1.39 
   1  20  -8    1.85    1.26 
   1 -20   8    3.49    1.34 
   1 -20   8    1.98    1.26 
   1 -21  -1   20.95    1.24 
   1 -21  -1   19.59    1.39 
  -1 -21   1   23.72    1.36 
   1  21   1   19.95    1.36 
  -1  21  -1   22.09    1.62 
  -1 -21   1   21.07    1.04 
  -1 -21   1   21.39    1.36 
   1 -21   1   20.66    1.30 
  -1  21   1   20.10    1.37 
  -1 -21  -1   21.69    1.46 
   1 -21   1   21.52    1.09 
   1  21  -1   22.81    1.64 
   1 -21   1   21.93    1.43 
  -1 -21  -1   20.57    1.16 
  -1 -21   3   14.59    1.40 
   1  21   3   13.45    1.31 
  -1 -21   3   14.01    1.03 
  -1  21  -3   14.19    1.56 
   1 -21  -3   15.06    1.41 
  -1 -21   3   14.50    1.18 
  -1 -21  -3   14.88    1.49 
   1  21  -3   14.52    1.61 
  -1 -21  -3   13.74    0.88 
   1 -21   3   13.53    1.18 
  -1  21   3   14.63    1.33 
   1 -21   3   13.46    1.00 
   1 -21   3   13.02    1.34 
  -1 -21   5    4.70    0.97 
  -1 -21   5    5.40    1.14 
   1  21   5    4.85    1.16 
  -1  21  -5    5.97    1.36 
   1 -21  -5    4.10    1.02 
   1 -21   5    4.52    1.10 
   1  21  -5    6.67    1.30 
   1 -21   5    4.34    0.99 
  -1  21   5    4.64    1.18 
  -1 -21  -5    5.29    1.09 
  -1 -21   7   -0.94    0.82 
   1 -21  -7   -0.05    0.85 
  -1 -21   7    1.05    0.98 
   1  21   7    1.23    1.20 
  -1  21  -7    1.26    1.21 
   1  21  -7    0.77    1.12 
   1 -21   7    0.89    0.97 
  -1  21   7   -0.28    1.11 
   1 -21   7    1.18    1.05 
  -1 -21  -7   -0.87    0.90 
  -1  22   0    5.09    1.00 
   1 -22   0    3.16    0.80 
   1 -22   0    3.77    0.50 
   1 -22   0    3.10    0.71 
  -1 -22   0    4.30    0.72 
  -1 -22   0    3.87    0.83 
   1  22   0    3.82    0.92 
  -1 -22   0    3.77    0.46 
  -1  22  -2   32.72    1.98 
  -1 -22   2   34.99    1.57 
   1  22   2   34.12    1.71 
  -1 -22   2   31.17    1.46 
   1 -22  -2   31.02    1.78 
  -1 -22   2   32.85    1.76 
   1 -22  -2   29.82    1.41 
   1 -22   2   33.66    1.52 
   1  22  -2   30.88    1.97 
  -1  22   2   29.96    1.64 
   1 -22   2   31.17    1.79 
  -1 -22  -2   25.98    1.77 
  -1 -22  -2   30.52    1.32 
   1 -22   2   30.20    1.47 
   1  22   4    4.77    1.08 
  -1 -22   4    4.96    1.06 
  -1  22  -4    2.85    1.06 
  -1 -22   4    5.88    1.00 
   1 -22  -4    6.16    1.12 
  -1  22   4    6.07    1.14 
   1 -22   4    4.71    1.03 
   1  22  -4    3.88    1.12 
  -1 -22  -4    4.40    1.04 
   1 -22   4    3.40    0.84 
   1  22   6   14.61    2.02 
   1 -22  -6   10.61    1.45 
  -1  22  -6   12.96    1.71 
  -1 -22   6   12.21    1.67 
  -1 -22   6   13.71    1.66 
   1  22  -6   14.87    1.93 
   1 -22   6   12.49    1.70 
   1 -22   6   11.57    1.54 
  -1  22   6   16.35    2.07 
  -1 -22  -6    9.70    1.45 
   1 -22  -8   -0.48    0.99 
  -1  22  -8   -0.83    1.14 
  -1 -22   8   -0.51    1.03 
  -1 -22   8    1.22    1.15 
   1  22   8    0.04    1.24 
   1 -22   8    0.74    1.15 
   1 -22   8    0.31    1.09 
  -1  22   8   -0.56    1.28 
   1  22  -8    0.92    1.19 
  -1 -22  -8   -1.22    0.99 
   1 -23  -1   -0.15    0.65 
  -1  23  -1    0.08    0.74 
   1  23   1    0.03    0.57 
  -1 -23   1    0.32    0.40 
  -1 -23   1   -0.11    0.53 
  -1 -23   1   -0.18    0.60 
   1 -23  -1    0.34    0.55 
  -1 -23  -1    0.41    0.71 
   1 -23   1    0.44    0.43 
  -1  23   1    1.27    0.66 
   1 -23   1   -0.99    0.55 
   1  23  -1    0.13    0.78 
   1 -23   1    0.75    0.62 
  -1 -23  -1   -0.04    0.50 
  -1  23  -3   11.11    1.45 
  -1 -23   3   13.15    1.04 
   1 -23  -3   13.01    1.44 
   1  23   3   12.77    1.34 
  -1 -23   3   13.47    1.18 
  -1 -23   3   14.46    1.46 
  -1 -23  -3   12.30    0.89 
   1 -23   3   13.87    1.06 
  -1  23   3   11.64    1.30 
  -1 -23  -3   11.93    1.36 
   1 -23   3   13.46    1.20 
   1 -23   3   15.50    1.53 
   1  23  -3   13.35    1.58 
   1 -23  -5    0.88    0.87 
  -1 -23   5    1.05    0.86 
  -1  23  -5    0.00    0.97 
  -1 -23   5    1.57    0.80 
   1  23   5    0.52    0.88 
   1 -23   5    0.78    0.90 
  -1 -23  -5    1.58    0.95 
  -1  23   5    0.37    0.83 
   1 -23   5    1.12    0.75 
   1  23  -5    2.07    1.10 
  -1 -23   7   -0.58    0.86 
   1 -23  -7    0.16    0.93 
   1  23   7   -0.54    1.12 
  -1  23  -7    2.18    1.30 
  -1 -23   7    0.53    1.08 
  -1  23   7   -0.18    1.06 
   1 -23   7   -0.37    0.91 
   1 -23   7    1.07    1.12 
  -1 -23  -7   -0.31    0.85 
   1  23  -7    1.40    1.26 
  -1 -24   0   12.69    1.17 
   1 -24   0   11.22    1.12 
   1  24   0   11.77    1.40 
   1 -24   0   10.15    0.73 
   1 -24   0   13.16    1.33 
  -1 -24   0   13.64    1.32 
  -1  24   0   13.44    1.48 
  -1 -24   0   12.03    0.71 
   1 -24  -2    9.05    0.91 
   1 -24  -2    9.61    1.29 
  -1 -24   2    8.69    1.01 
  -1 -24   2    8.82    0.92 
  -1  24  -2    7.99    1.34 
  -1 -24   2    8.89    1.14 
   1  24   2    9.57    1.16 
  -1 -24  -2   10.59    1.33 
  -1  24   2   10.59    1.27 
   1 -24   2   10.78    1.25 
   1  24  -2    9.14    1.38 
  -1 -24  -2   10.78    0.93 
   1 -24   2    9.28    1.04 
   1 -24   2   10.26    1.00 
  -1 -24   4    8.39    1.16 
  -1 -24   4    6.24    1.18 
   1  24   4    7.32    1.26 
   1 -24  -4    6.00    1.16 
  -1  24  -4    8.07    1.39 
   1 -24   4    8.57    1.16 
   1  24  -4    6.92    1.37 
  -1  24   4    9.41    1.39 
  -1 -24  -4    9.75    1.32 
   1 -24   4    8.31    1.32 
  -1 -24   6    0.89    0.88 
   1 -24  -6   -0.38    0.81 
  -1 -24   6    1.14    0.90 
   1  24   6    1.49    1.11 
  -1  24  -6    0.28    1.24 
   1 -24   6    0.65    0.99 
  -1  24   6    2.29    1.16 
  -1 -24  -6    2.24    1.07 
   1  24  -6    1.56    1.26 
   1 -24   6    0.55    0.81 
  -1 -24   8    0.26    1.11 
   1  24   8   -0.19    1.23 
   1 -24  -8    0.21    1.04 
  -1  24  -8    2.03    1.45 
  -1 -24   8    1.24    1.21 
  -1 -24  -8    1.36    1.10 
   1  24  -8    1.01    1.34 
  -1  24   8   -0.56    1.20 
   1 -24   8   -0.14    1.18 
   1 -24   8    0.29    1.17 
  -1  25  -1    0.93    0.86 
   1  25   1    1.58    0.77 
   1 -25  -1    0.94    0.82 
  -1 -25   1    2.05    0.51 
  -1 -25   1    0.51    0.66 
  -1 -25   1    1.49    0.68 
   1 -25  -1    1.90    0.67 
   1 -25   1    0.50    0.66 
  -1 -25  -1    0.52    0.74 
   1 -25   1    1.67    0.73 
   1 -25   1    1.42    0.49 
  -1 -25  -1    1.40    0.60 
   1  25  -1    1.26    0.86 
  -1  25   1    1.52    0.75 
  -1  25  -3    3.53    1.23 
   1 -25  -3    4.25    1.07 
   1 -25  -3    3.19    0.68 
   1  25   3    3.96    0.96 
  -1 -25   3    3.89    0.76 
  -1 -25   3    5.07    0.87 
  -1 -25   3    3.89    0.99 
   1 -25   3    4.35    0.85 
   1  25  -3    5.74    1.36 
  -1  25   3    4.41    1.03 
   1 -25   3    3.15    0.72 
   1 -25   3    6.15    1.09 
  -1 -25  -3    2.44    0.94 
  -1 -25   5    4.24    1.02 
   1  25   5    3.87    1.18 
  -1 -25   5    2.64    1.03 
  -1  25  -5    2.83    1.26 
   1 -25  -5    2.97    1.06 
  -1 -25  -5    3.28    1.11 
   1 -25   5    3.02    1.11 
   1  25  -5    3.11    1.27 
   1 -25   5    3.14    0.89 
  -1  25   5    2.51    1.11 
  -1 -25   7    2.11    1.23 
   1  25   7    1.03    1.23 
   1 -25  -7    0.47    1.07 
  -1 -25   7    0.86    1.08 
  -1  25  -7    3.10    1.49 
  -1 -25  -7    2.41    1.19 
  -1  25   7    1.02    1.26 
   1 -25   7    0.64    1.08 
   1  25  -7    0.60    1.42 
   1 -25   7    1.95    1.16 
  -1 -26   0    0.77    0.61 
  -1 -26   0    0.10    0.71 
   1 -26   0   -0.27    0.61 
   1 -26   0    0.47    0.34 
   1  26   0    1.28    0.86 
   1 -26   0    0.96    0.75 
  -1  26   0   -0.39    0.73 
  -1 -26   2    8.17    0.91 
   1 -26  -2    7.05    0.89 
  -1 -26   2    7.81    1.04 
   1 -26  -2    6.27    1.15 
   1  26   2    8.09    1.23 
  -1  26  -2    6.96    1.30 
  -1 -26   2    9.33    1.23 
  -1 -26  -2    8.38    1.25 
  -1  26   2    8.28    1.27 
   1  26  -2    7.55    1.42 
  -1 -26  -2    8.70    0.89 
   1 -26   2    8.08    1.12 
   1 -26   2    7.38    1.01 
   1 -26   2    9.09    0.97 
   1 -26  -4    0.18    0.81 
  -1  26  -4    0.97    1.16 
  -1 -26   4    0.18    0.58 
  -1 -26   4    0.77    0.86 
   1  26   4    0.23    0.81 
   1 -26   4   -0.54    0.75 
  -1 -26  -4   -0.33    0.87 
   1  26  -4    0.53    1.07 
   1 -26   4    0.07    0.64 
  -1  26   4    0.18    0.84 
  -1  26  -6    0.56    1.30 
  -1 -26   6    0.41    0.96 
   1  26   6    0.32    1.09 
   1 -26  -6   -1.00    0.82 
  -1 -26   6    0.32    0.85 
   1 -26   6    0.92    0.89 
   1 -26   6    1.73    1.09 
   1  26  -6   -0.55    1.19 
  -1 -26  -6   -0.90    0.92 
  -1  26   6    0.08    1.07 
   1  27   1   10.28    1.29 
  -1 -27   1    9.44    0.86 
   1 -27  -1   11.34    1.40 
   1 -27  -1    9.62    1.06 
  -1 -27   1   10.44    1.24 
  -1  27  -1    9.65    1.46 
  -1 -27   1    9.17    1.12 
   1 -27   1   10.74    0.92 
  -1  27   1    9.42    1.26 
  -1 -27  -1   10.03    1.34 
   1 -27   1   11.69    1.27 
  -1 -27  -1    7.92    0.97 
   1  27  -1    6.93    1.32 
   1 -27   1    9.48    1.17 
   1  27   3    0.95    0.80 
  -1 -27   3    1.73    0.68 
  -1 -27   3    1.63    0.64 
   1 -27  -3    0.65    0.83 
  -1  27  -3    0.59    1.11 
  -1 -27   3    0.70    0.78 
  -1 -27  -3    1.15    0.90 
   1  27  -3    0.77    1.15 
   1 -27   3    2.00    0.68 
   1 -27   3    2.08    0.90 
   1 -27   3    0.85    0.62 
  -1  27   3    0.27    0.77 
  -1  27  -5    2.13    1.35 
   1  27   5    1.54    1.03 
  -1 -27   5    2.64    0.92 
   1 -27  -5    4.88    1.18 
  -1 -27   5    2.98    1.16 
   1  27  -5    1.92    1.31 
   1 -27   5    1.88    1.02 
   1 -27   5    1.97    0.87 
  -1  27   5    2.28    1.06 
  -1 -27  -5    4.29    1.18 
   1 -27  -7    0.17    1.02 
  -1 -27   7   -0.56    1.01 
   1  27   7    0.82    1.26 
  -1  27  -7   -1.21    1.35 
  -1 -27   7   -0.14    0.91 
   1 -27   7   -0.20    1.00 
   1  27  -7   -0.34    1.32 
  -1  27   7    0.91    1.31 
   1 -27   7    0.60    0.99 
  -1 -27  -7   -0.81    1.01 
  -1  28   0    0.35    0.86 
   1 -28   0    0.02    0.72 
   1 -28   0   -0.15    0.59 
  -1 -28   0    0.08    0.75 
  -1 -28   0    0.06    0.59 
   1  28   0    0.89    0.88 
   1 -28  -2   16.45    1.67 
  -1 -28   2   13.64    1.34 
  -1 -28   2   13.88    1.12 
  -1 -28   2   11.41    1.34 
  -1  28  -2   12.59    1.71 
   1 -28  -2   10.68    1.06 
   1  28   2   12.13    1.44 
   1  28  -2   10.46    1.55 
   1 -28   2   12.16    1.26 
  -1  28   2   13.34    1.47 
  -1 -28  -2   12.58    1.13 
  -1 -28  -2   14.84    1.62 
   1 -28   2   10.93    1.33 
   1 -28   2   14.57    1.16 
  -1 -28   4    2.73    0.85 
   1  28   4    2.86    1.08 
  -1  28  -4    4.06    1.32 
   1 -28  -4    2.57    1.04 
  -1 -28   4    1.45    0.89 
  -1  28   4    2.35    1.04 
   1  28  -4    1.78    1.23 
   1 -28   4    2.70    0.85 
  -1 -28  -4    1.92    1.02 
   1 -28   4    0.30    0.85 
   1  28   6    0.20    1.14 
  -1 -28   6    0.99    1.05 
   1 -28  -6    0.21    0.95 
  -1 -28   6    1.57    0.95 
  -1  28  -6    0.22    1.35 
   1  28  -6    0.11    1.35 
  -1 -28  -6    2.21    1.15 
  -1  28   6    0.65    1.23 
   1 -28   6    1.19    1.10 
   1 -28   6   -0.37    0.76 
  -1  29  -1    0.21    0.98 
   1 -29  -1    1.39    0.89 
   1 -29  -1    0.47    0.66 
  -1 -29   1    0.34    0.66 
   1  29   1    0.59    0.78 
  -1 -29   1    1.42    0.85 
  -1 -29  -1    1.01    0.93 
   1 -29   1    1.88    0.80 
   1  29  -1    0.90    1.05 
   1 -29   1    1.90    0.69 
  -1  29   1    1.23    0.84 
  -1 -29  -1    1.73    0.69 
   1 -29   1    0.71    0.80 
   1  29   3    0.57    0.88 
   1 -29  -3    1.09    0.92 
  -1 -29   3    1.28    0.88 
  -1  29  -3    0.35    1.17 
  -1 -29   3    0.96    0.62 
  -1 -29   3    1.81    0.75 
  -1 -29  -3    1.75    1.02 
   1 -29   3    0.62    0.68 
   1 -29   3    0.89    0.84 
   1  29  -3   -0.56    1.04 
   1 -29   3    0.82    0.63 
  -1  29   3    2.15    0.96 
   1  29   5    3.63    1.24 
  -1 -29   5    3.62    1.05 
  -1 -29   5    2.25    1.07 
  -1  29  -5    4.09    1.54 
   1 -29  -5    1.09    1.04 
  -1 -29  -5    2.16    1.15 
  -1  29   5    3.86    1.37 
   1 -29   5    3.29    1.00 
   1  29  -5    1.93    1.36 
   1 -29   5    3.23    1.16 
  -1 -29   7   -0.38    1.04 
   1 -29   7   -0.29    1.00 
  -1 -30   0   16.29    1.46 
  -1  30   0   18.67    1.82 
   1  30   0   18.78    1.81 
   1 -30   0   18.12    1.71 
  -1 -30   0   17.36    1.63 
   1 -30   0   17.49    1.53 
  -1 -30   2    0.58    0.72 
  -1  30  -2   -0.55    1.04 
   1  30   2    0.96    0.85 
  -1 -30   2    0.24    0.53 
  -1 -30   2   -0.06    0.69 
   1 -30  -2   -0.40    0.58 
   1 -30  -2    1.52    0.92 
   1  30  -2   -0.16    1.05 
   1 -30   2    0.01    0.77 
  -1 -30  -2    0.27    0.89 
  -1  30   2    0.55    0.84 
   1 -30   2    1.19    0.74 
   1 -30   2    0.14    0.52 
   1  30   4   11.19    1.73 
  -1 -30   4    7.55    1.40 
  -1  30  -4   11.41    1.91 
   1 -30  -4   10.84    1.63 
  -1 -30   4    9.25    1.25 
  -1  30   4    7.99    1.58 
   1  30  -4    7.59    1.66 
   1 -30   4    9.30    1.25 
  -1 -30  -4    8.56    1.46 
   1 -30   4    7.92    1.46 
   1  30   6    1.73    1.29 
  -1 -30   6    0.07    0.84 
  -1  30  -6   -0.67    1.36 
  -1 -30   6    0.51    1.10 
   1 -30  -6    0.82    1.09 
   1 -30   6   -0.96    0.89 
  -1 -30  -6    0.88    1.06 
   1  30  -6    0.32    1.48 
  -1  30   6   -0.26    1.16 
   1 -30   6   -0.70    0.79 
  -1  31  -1    5.60    1.37 
  -1 -31   1    4.74    1.09 
   1 -31  -1    5.36    0.98 
  -1 -31   1    3.52    0.94 
   1  31   1    5.21    1.19 
   1 -31  -1    4.33    1.15 
  -1 -31  -1    6.23    0.94 
   1 -31   1    2.97    0.91 
  -1  31   1    4.19    1.11 
   1  31  -1    5.08    1.39 
   1 -31   1    4.84    1.09 
  -1 -31  -1    2.99    1.08 
  -1 -31   3    0.03    0.78 
  -1 -31   3    0.27    0.60 
  -1 -31   3    0.42    0.75 
   1 -31  -3    0.10    0.93 
   1  31   3   -1.36    0.73 
  -1  31  -3   -1.97    1.02 
   1 -31   3   -0.33    0.53 
  -1 -31  -3    1.82    1.06 
   1 -31   3   -0.17    0.74 
  -1  31   3    0.31    1.01 
   1 -31   3   -1.08    0.69 
   1  31  -3   -0.64    1.10 
  -1  31  -5   -1.26    1.39 
   1  31   5   -0.28    0.99 
   1 -31  -5    0.10    1.02 
  -1 -31   5    0.19    0.76 
  -1 -31   5   -1.35    0.76 
   1 -31   5   -1.09    0.67 
   1 -31   5   -0.29    0.92 
  -1  31   5    0.77    1.20 
  -1 -31  -5    0.24    1.04 
   1  31  -5   -0.52    1.34 
  -1 -32   0    1.41    0.71 
   1 -32   0    0.24    0.74 
   1 -32   0    0.39    0.90 
  -1  32   0    0.21    0.95 
   1  32   0   -0.10    0.95 
  -1 -32   0    1.49    0.94 
  -1 -32   2    0.66    0.74 
  -1  32  -2    0.97    1.15 
  -1 -32   2    1.64    0.88 
   1 -32  -2    0.64    0.99 
   1  32   2    1.45    0.97 
  -1 -32  -2    1.28    1.06 
   1  32  -2    3.45    1.44 
   1 -32   2    2.55    0.93 
   1 -32   2    1.65    0.90 
  -1  32   2    1.10    0.97 
   1 -32  -4   10.86    1.70 
  -1 -32   4    7.97    1.21 
  -1 -32   4    6.81    1.39 
  -1  32  -4    8.26    1.85 
   1  32   4    7.85    1.59 
  -1  32   4    6.88    1.53 
   1 -32   4    8.03    1.54 
   1  32  -4    6.26    1.71 
   1 -32   4    5.26    1.05 
  -1 -32  -4    5.74    1.40 
  -1  32  -6    1.01    1.66 
  -1 -32   6    0.81    0.85 
   1 -32  -6    0.30    1.04 
   1  32   6    0.33    1.22 
  -1 -32   6    0.89    1.13 
  -1  32   6    0.89    1.31 
   1 -32   6    0.43    0.91 
   1  32  -6    1.35    1.55 
  -1 -32  -6    1.14    1.19 
   1 -32   6   -0.56    1.00 
   1  33   1   -0.01    0.88 
   1 -33  -1    0.26    0.65 
  -1 -33   1    0.48    0.71 
   1 -33  -1    2.25    1.09 
  -1  33  -1    0.25    1.14 
  -1 -33   1    0.07    0.89 
  -1 -33  -1    0.36    0.94 
  -1  33   1   -0.10    0.92 
   1 -33   1    0.33    0.88 
  -1 -33  -1    0.68    0.63 
   1 -33   1   -0.15    0.74 
   1  33  -1   -0.58    1.05 
  -1  33  -3    0.66    1.42 
   1  33   3    2.00    1.20 
  -1 -33   3    1.49    0.91 
   1 -33  -3    2.94    1.22 
   1 -33   3    3.03    1.05 
  -1  33   3    2.18    1.19 
  -1 -33  -3    2.74    1.26 
   1 -33   3    1.89    0.98 
   1  33  -3    1.80    1.41 
  -1  33  -5    4.04    1.88 
   1  33   5    4.04    1.56 
   1 -33  -5    2.80    1.21 
  -1 -33   5    5.75    1.40 
  -1 -33   5    5.77    1.12 
   1 -33   5    2.58    1.29 
   1 -33   5    8.83    1.32 
   1  33  -5    4.40    1.76 
  -1  33   5    6.51    1.69 
  -1 -33  -5    7.49    1.58 
  -1 -34   0   -0.78    0.60 
   1  34   0    0.67    1.06 
  -1 -34   0   -0.93    0.84 
   1 -34   0    0.26    0.73 
   1 -34   0   -0.18    0.85 
  -1  34   0    0.24    1.04 
  -1  34  -2   -0.35    1.26 
   1 -34  -2   -1.49    0.86 
  -1 -34   2    0.61    0.92 
  -1 -34   2    0.55    0.78 
   1  34   2   -0.54    0.96 
   1  34  -2   -0.38    1.27 
  -1 -34  -2   -0.58    1.05 
   1 -34   2    0.21    0.85 
   1 -34   2   -0.17    0.79 
  -1  34   2   -1.87    0.93 
   1  34   4    1.75    1.28 
  -1 -34   4   -0.75    0.79 
  -1 -34   4    1.24    0.79 
   1 -34  -4    2.14    1.21 
  -1  34  -4   -0.50    1.40 
   1 -34   4    1.39    0.80 
  -1  34   4    0.87    1.18 
   1  34  -4   -0.63    1.47 
   1 -34   4    2.15    1.14 
  -1 -34  -4    2.98    1.32 
   1 -35  -1   -0.71    0.97 
   1  35   1   -1.66    0.96 
  -1 -35   1   -0.39    0.67 
  -1  35  -1    0.62    1.23 
  -1 -35   1    0.28    0.90 
   1 -35  -1   -1.52    0.75 
   1 -35   1    0.30    0.78 
   1  35  -1   -0.78    1.14 
  -1 -35  -1    0.38    1.04 
  -1  35   1   -0.51    1.06 
   1 -35   1    0.20    0.88 
  -1  35  -3    9.03    2.07 
   1  35   3    8.77    1.70 
   1 -35  -3    8.78    1.66 
  -1 -35   3    7.40    1.41 
  -1  35   3   11.36    1.95 
  -1 -35  -3    9.85    1.75 
   1  35  -3    5.10    1.69 
   1 -35   3    7.48    1.38 
  -1  36   0   16.13    2.13 
  -1 -36   0   14.29    1.81 
   1  36   0   17.86    2.23 
   1 -36   0   12.93    1.50 
   1 -36   0   16.27    1.85 
  -1 -36   0   13.78    1.50 
   1 -36  -2    0.97    1.14 
  -1 -36   2    0.38    0.95 
  -1 -36   2   -0.18    0.75 
   1  36   2    0.08    1.06 
  -1  36  -2   -0.13    1.41 
  -1 -36  -2    0.54    1.16 
   1 -36   2    0.97    0.92 
   1  36  -2   -0.87    1.27 
  -1  36   2    0.24    1.15 
   1 -36   2   -0.15    0.77 
  -1  36  -4    1.69    1.78 
  -1 -36   4    1.40    1.03 
   1  36   4    2.82    1.45 
   1 -36  -4    3.41    1.36 
   1 -36   4    1.77    1.11 
  -1 -36  -4    2.18    1.36 
   1  36  -4    0.70    1.60 
  -1  36   4    1.18    1.33 
  -1 -37   1    0.92    1.02 
  -1 -37   1    0.67    0.81 
  -1  37  -1    0.63    1.33 
   1 -37  -1   -0.75    1.01 
   1  37   1   -1.06    1.02 
   1 -37   1    0.74    0.83 
  -1  37   1    0.17    1.20 
  -1 -37  -1   -0.37    1.05 
   1 -37   1    0.79    1.02 
   1  37  -1    0.23    1.26 
  -1  37  -3    4.05    1.83 
   1  37   3    1.78    1.41 
   1 -37  -3    1.86    1.25 
  -1 -37   3    2.22    1.03 
   1  37  -3    4.17    1.70 
  -1  37   3    1.65    1.37 
  -1 -37  -3    3.12    1.43 
   1 -37   3    2.34    1.13 
  -1 -38   0   -0.02    0.98 
   1 -38   0    0.55    1.10 
   1 -38   0   -0.60    0.74 
  -1  38   0    0.31    1.31 
   1  38   0    0.36    1.23 
   1 -38  -2    0.60    1.14 
   1  38   2    1.09    1.25 
  -1  38  -2   -1.03    1.51 
  -1 -38   2   -0.04    0.77 
  -1 -38   2    0.83    1.08 
  -1  38   2    0.30    1.29 
  -1 -38  -2    1.65    1.25 
   1 -38   2    0.19    0.82 
   1  38  -2   -1.64    1.35 
   1 -38   2    0.18    1.06 
  -1  39  -1   -1.42    1.32 
   1  39   1   -0.67    1.17 
   1 -39  -1    0.31    1.13 
  -1 -39   1    0.87    0.85 
  -1 -39   1    1.06    1.09 
   1  39  -1    0.35    1.42 
  -1 -39  -1   -0.14    1.14 
  -1  39   1   -0.38    1.28 
   1 -39   1    0.31    1.02 
   1 -39   1    0.23    0.80 
   1  40   0    1.02    1.48 
  -1  40   0    1.09    1.44 
   1 -40   0    0.54    1.20 
  -1 -40   0    1.07    1.26 
   2   0   0   -0.66    0.06 
   2   0   0   -0.83    0.02 
  -2   0   0   -0.80    0.04 
  -2   0   0   -0.83    0.11 
  -2   0   0   -0.84    0.08 
  -2   0   2  424.05    8.70 
  -2   0   2  410.16    8.49 
   2   0   2  415.55    8.88 
  -2   0   2  408.74    8.85 
  -2   0   2  411.81    8.66 
   2   0   2  422.21    8.69 
  -2   0  -2  409.70    8.50 
   2   0   2  419.99    8.58 
   2   0  -4   20.08    0.82 
   2   0   4   17.57    0.97 
  -2   0   4   19.03    1.05 
   2   0   4   19.38    1.13 
  -2   0  -4   15.38    0.78 
  -2   0   4   17.50    1.12 
   2   0   4   16.86    1.33 
  -2   0  -6    8.23    0.71 
   2   0  -6    9.18    0.73 
  -2   0   6    9.38    1.08 
  -2   0  -6    6.76    1.28 
   2   0  -6    8.30    1.31 
  -2   0   6    7.45    0.91 
   2   0   6    7.68    1.04 
   2   0   6    8.80    0.95 
  -2   0   8    7.04    1.12 
  -2   0   8    7.71    1.26 
   2   0  -8    8.76    1.66 
   2   0   8    8.13    1.30 
   2   0   8    7.07    1.07 
  -2   0  -8    7.78    1.61 
   2   0  10    3.87    1.22 
  -2   0 -10    8.62    1.86 
  -2   0  10    4.63    1.30 
   2   0 -10   10.54    1.81 
  -2  -1   1   56.99    1.45 
  -2   1  -1   56.91    1.33 
   2   1   1   59.20    1.30 
   2   1   1   58.16    1.38 
  -2  -1   1   58.09    1.43 
  -2  -1   1   57.99    1.34 
   2   1   1   59.53    1.53 
   2   1  -1   58.83    1.49 
  -2  -1  -1   59.71    1.40 
  -2   1   1   57.44    1.48 
  -2   1   1   56.89    1.38 
  -2   1   1   55.19    1.38 
  -2   1   1   57.16    1.41 
   2  -1   1   59.73    1.44 
   2  -1   1   59.12    1.39 
   2   1   3   18.76    0.84 
  -2  -1   3   18.87    1.04 
  -2  -1   3   18.90    0.68 
   2   1   3   18.49    0.96 
   2   1   3   16.93    1.22 
  -2   1  -3   14.07    0.68 
  -2  -1   3   19.42    0.98 
  -2   1   3   19.44    1.23 
   2   1  -3   19.44    1.25 
  -2   1   3   18.30    0.99 
  -2   1   3   17.43    0.91 
   2  -1   3   19.37    0.92 
   2  -1   3   17.70    1.24 
   2  -1   3   18.33    1.00 
  -2  -1  -3   16.09    0.78 
  -2   1   3   20.34    0.79 
  -2  -1   5    7.25    0.95 
   2   1   5    6.87    1.07 
   2   1   5    6.85    0.87 
   2   1   5    7.35    0.78 
  -2  -1   5    7.19    0.87 
  -2   1  -5    6.02    1.03 
  -2   1  -5    6.17    0.54 
   2  -1  -5    6.34    0.62 
   2   1  -5    6.39    0.57 
  -2   1   5    7.68    0.82 
   2   1  -5    7.41    1.16 
   2  -1   5    6.25    0.77 
  -2  -1  -5    5.04    0.60 
  -2   1   5    6.21    0.83 
   2  -1   5    5.91    0.84 
   2   1   7    2.88    0.75 
   2  -1  -7    2.07    1.04 
   2   1   7    2.19    0.82 
  -2  -1   7    3.27    0.83 
  -2   1  -7    2.77    1.14 
  -2  -1   7    1.97    0.82 
  -2   1   7    2.34    0.74 
   2  -1   7    2.09    0.75 
   2   1  -7    2.64    1.08 
   2  -1   7    2.96    0.87 
  -2  -1  -7    3.11    1.22 
  -2   1   7    2.71    0.86 
  -2  -1   9    6.11    1.25 
  -2   1  -9    7.67    1.60 
   2   1   9    5.79    1.26 
   2  -1  -9   11.74    1.97 
  -2  -1   9    7.66    1.21 
  -2   1   9    9.38    1.31 
  -2  -1  -9    8.50    1.69 
   2  -1   9    5.87    1.18 
  -2   1   9    6.63    1.28 
   2   1  -9    9.25    1.66 
   2  -1   9    8.12    1.44 
  -2  -2   0   55.50    1.30 
  -2   2   0   53.99    1.21 
  -2   2   0   53.72    1.30 
   2   2   0   60.22    1.26 
   2  -2   0   53.87    1.21 
   2   2   0   57.42    1.31 
  -2  -2   2  584.14   11.91 
   2   2   2  558.46   11.64 
  -2  -2   2  566.37   11.57 
   2   2   2  583.21   11.80 
  -2   2  -2  554.22   11.57 
   2   2   2  571.57   12.04 
  -2   2  -2  582.18   12.04 
  -2  -2   2  569.53   11.88 
  -2   2   2  589.84   11.81 
   2   2  -2  573.32   12.00 
  -2   2   2  565.80   11.78 
   2  -2   2  580.42   11.90 
  -2  -2  -2  570.87   11.76 
  -2   2   2  575.05   11.76 
  -2   2   2  579.63   12.01 
   2  -2   2  585.29   11.83 
  -2   2  -4   32.95    1.71 
  -2  -2   4   32.26    1.46 
  -2   2  -4   30.86    0.98 
   2   2   4   33.99    1.39 
  -2  -2   4   34.77    1.44 
   2  -2  -4   32.85    1.19 
   2   2   4   33.54    1.23 
   2   2   4   32.09    1.69 
   2   2  -4   30.89    1.66 
   2  -2   4   34.38    1.36 
   2  -2   4   36.00    1.50 
  -2   2   4   34.03    1.40 
  -2   2   4   33.62    1.70 
  -2   2   4   34.14    1.32 
   2   2  -4   31.25    0.98 
  -2  -2  -4   32.96    1.20 
  -2   2  -6    2.26    0.50 
  -2   2  -6    1.23    0.87 
  -2  -2   6    2.36    0.72 
   2  -2  -6    1.14    0.49 
  -2  -2   6    2.42    0.75 
   2   2   6    1.13    0.67 
   2   2   6    1.97    0.61 
   2   2   6    2.20    0.94 
   2   2  -6    2.34    0.41 
  -2   2   6    2.42    0.65 
   2   2  -6    1.78    0.94 
  -2   2   6    2.09    0.71 
  -2  -2  -6    2.13    0.56 
   2  -2   6    1.22    0.67 
   2  -2   6    2.37    0.80 
  -2  -2   8    0.51    0.73 
  -2   2  -8   -0.60    0.97 
  -2  -2   8   -0.19    0.72 
   2  -2  -8    1.38    1.14 
   2   2   8    0.07    0.61 
   2   2   8   -1.08    0.68 
  -2   2   8   -0.11    0.62 
   2  -2   8   -0.11    0.76 
  -2   2   8   -0.76    0.63 
  -2  -2  -8    0.20    1.04 
   2  -2   8   -0.30    0.67 
   2   2  -8    0.68    1.03 
   2  -2 -10   14.18    2.13 
  -2   2 -10    8.25    1.77 
   2   2  10    6.92    1.45 
  -2  -2  10    5.18    1.34 
   2   2 -10   12.54    2.09 
   2  -2  10    7.74    1.56 
  -2  -2 -10   11.70    2.02 
  -2   2  10    8.92    1.53 
  -2   3  -1   43.13    1.05 
   2   3   1   45.19    1.05 
   2   3   1   47.38    1.26 
  -2   3  -1   40.07    1.24 
  -2  -3   1   41.14    1.06 
  -2  -3   1   44.57    1.24 
  -2  -3   1   44.79    1.21 
  -2   3   1   45.26    1.08 
   2  -3   1   44.78    1.22 
   2  -3   1   43.42    1.21 
  -2   3   1   42.05    1.13 
  -2   3   1   45.24    1.21 
  -2   3   1   44.38    1.20 
  -2  -3  -1   44.90    1.24 
   2   3  -1   44.42    1.22 
   2   3   3    1.38    0.42 
  -2  -3   3    2.12    0.25 
  -2   3  -3    1.34    0.61 
  -2  -3   3    0.93    0.49 
   2   3   3    1.79    0.62 
  -2   3  -3    1.25    0.26 
  -2  -3   3    1.18    0.48 
   2   3   3    0.92    0.33 
   2  -3   3    1.36    0.46 
   2   3  -3    0.89    0.61 
  -2   3   3    1.29    0.42 
   2  -3   3    1.17    0.50 
  -2   3   3    1.04    0.39 
  -2  -3  -3    0.27    0.40 
  -2   3   3    0.84    0.41 
  -2   3   3    1.32    0.57 
   2   3   5    7.82    1.11 
   2  -3  -5    8.54    0.78 
  -2  -3   5   10.41    1.06 
  -2  -3   5    9.25    0.98 
   2   3   5    9.04    0.80 
   2   3   5    8.48    0.92 
  -2   3  -5   10.21    1.29 
   2  -3   5    9.08    1.04 
  -2   3   5   10.01    0.98 
  -2  -3  -5    8.67    0.80 
   2  -3   5    9.22    0.92 
   2   3  -5   10.06    1.19 
   2   3  -5    8.01    0.50 
  -2   3   5    8.94    1.19 
  -2   3   5   10.24    0.91 
  -2  -3   7    3.48    0.91 
   2  -3  -7    4.69    1.19 
   2   3   7    3.64    0.73 
   2   3   7    3.65    0.92 
  -2  -3   7    3.41    0.90 
  -2   3  -7    4.74    1.22 
   2  -3   7    3.81    0.99 
  -2   3   7    3.45    0.81 
   2   3  -7    3.97    1.17 
   2  -3   7    3.91    0.89 
  -2   3   7    3.16    0.85 
  -2  -3   9    5.31    1.17 
   2  -3  -9    7.00    1.64 
  -2   3  -9    7.34    1.69 
  -2  -3   9    2.53    1.08 
   2   3   9    5.68    1.24 
  -2  -3  -9    8.09    1.66 
   2  -3   9    6.40    1.20 
  -2   3   9    5.81    1.17 
   2  -3   9    6.64    1.38 
   2   3  -9    5.80    1.55 
  -2  -4   0   -0.32    0.15 
   2  -4   0    0.12    0.19 
  -2   4   0    0.14    0.26 
   2   4   0    1.18    0.26 
  -2  -4   0   -0.18    0.21 
  -2   4   0    0.78    0.21 
  -2  -4   0    0.00    0.27 
  -2  -4   2  430.08    8.87 
  -2  -4   2  431.10    8.46 
  -2   4  -2  419.18    8.93 
  -2  -4   2  419.26    8.86 
  -2   4  -2  405.67    8.44 
   2   4   2  420.89    8.96 
   2   4   2  427.18    8.65 
   2   4  -2  393.99    8.49 
  -2  -4  -2  425.19    8.78 
  -2   4   2  412.19    8.92 
  -2   4   2  423.94    8.67 
   2  -4   2  422.10    8.87 
   2   4  -2  425.28    8.91 
   2  -4   2  414.04    8.45 
   2  -4   2  414.83    8.80 
  -2   4   2  418.61    8.65 
  -2   4   2  414.91    8.77 
   2   4   4   38.23    1.85 
   2   4   4   39.71    1.50 
  -2  -4   4   40.80    1.65 
   2   4   4   42.00    1.33 
   2  -4  -4   41.47    1.45 
  -2  -4   4   41.97    1.69 
  -2   4  -4   40.71    1.85 
  -2  -4  -4   38.48    1.43 
   2  -4   4   42.74    1.69 
  -2   4   4   41.28    1.51 
   2   4  -4   38.84    1.82 
  -2   4   4   40.15    1.43 
  -2   4   4   43.52    1.89 
   2  -4   4   41.34    1.60 
   2   4   6    2.03    0.71 
  -2   4  -6    2.31    1.05 
   2   4   6    3.14    0.65 
   2   4   6    2.08    0.94 
  -2  -4   6    2.83    0.83 
  -2  -4   6    2.88    0.75 
   2  -4  -6    1.73    0.57 
   2   4  -6    3.06    1.01 
  -2   4   6    2.64    0.66 
  -2  -4  -6    2.36    0.63 
   2  -4   6    2.95    0.82 
   2  -4   6    2.62    0.75 
  -2   4   6    1.24    0.84 
  -2   4   6    3.07    0.75 
   2   4   8    2.78    0.93 
  -2  -4   8    4.23    1.01 
  -2  -4   8    1.46    0.92 
  -2   4  -8    3.05    1.19 
   2  -4  -8    4.90    1.34 
  -2   4   8    4.51    0.91 
   2   4  -8    4.14    1.28 
  -2   4   8    2.61    0.87 
   2  -4   8    2.71    0.93 
   2  -4   8   -0.03    0.84 
  -2  -4  -8    4.97    1.33 
   2   4  10    2.06    1.00 
   2  -4 -10    7.16    1.65 
  -2  -4  10    3.01    1.09 
  -2  -4  10    2.78    1.17 
  -2   4 -10    5.53    1.65 
   2  -4  10    3.26    1.25 
  -2  -4 -10    6.64    1.71 
   2   4 -10    5.88    1.61 
  -2   4  10    1.87    1.02 
  -2   5  -1   38.42    1.24 
  -2  -5   1   39.50    1.19 
   2   5   1   39.41    1.20 
  -2  -5   1   39.23    1.24 
  -2   5  -1   42.00    1.07 
  -2  -5   1   35.29    1.05 
   2   5  -1   40.11    1.22 
  -2   5   1   41.05    0.99 
   2  -5   1   43.51    1.28 
  -2   5   1   40.16    1.25 
   2  -5   1   42.91    1.24 
  -2   5   1   42.42    1.19 
  -2  -5  -1   41.38    1.27 
   2   5   3   69.73    1.71 
  -2   5  -3   72.25    2.28 
   2   5   3   70.48    2.30 
   2   5   3   67.40    1.88 
   2  -5  -3   69.12    2.00 
  -2  -5   3   70.62    2.14 
  -2  -5   3   69.25    2.14 
  -2   5   3   70.60    2.27 
   2   5  -3   67.72    2.25 
  -2  -5  -3   69.03    1.99 
  -2   5   3   71.77    1.88 
  -2   5   3   71.40    1.90 
   2  -5   3   70.10    2.15 
   2  -5   3   67.94    2.07 
   2   5   5    2.30    0.49 
  -2  -5   5    3.64    0.79 
   2  -5  -5    3.68    0.64 
   2   5   5    3.69    0.68 
   2   5   5    3.96    0.93 
  -2  -5   5    3.09    0.75 
  -2   5  -5    2.52    0.88 
   2  -5   5    3.72    0.73 
   2  -5   5    3.34    0.78 
   2   5  -5    2.39    0.89 
  -2   5   5    2.72    0.62 
  -2   5   5    2.62    0.56 
  -2   5   5    3.05    0.91 
  -2  -5  -5    2.61    0.63 
  -2  -5   7    9.43    1.24 
  -2   5  -7    8.90    1.46 
  -2  -5   7    8.36    1.22 
   2   5   7    8.98    1.56 
   2   5   7   10.71    1.24 
   2   5   7   10.10    0.98 
   2  -5  -7   11.02    1.05 
  -2   5   7   11.26    1.09 
  -2   5   7    8.74    1.12 
  -2  -5  -7   10.50    1.06 
   2   5  -7   11.61    1.69 
   2  -5   7   11.09    1.42 
   2  -5   7    8.31    1.12 
  -2   5   7    8.90    1.55 
  -2  -5   9    6.51    1.32 
  -2   5  -9    8.59    1.71 
   2   5   9    6.07    1.23 
  -2  -5   9    5.01    1.21 
   2  -5  -9   12.15    1.98 
   2  -5   9    6.23    1.25 
   2   5  -9    7.31    1.62 
  -2  -5  -9   10.31    1.79 
   2  -5   9    5.21    1.32 
  -2   5   9    6.30    1.24 
  -2  -6   0  232.34    4.89 
  -2   6   0  233.85    4.95 
   2   6   0  227.52    4.98 
  -2  -6   0  232.99    4.99 
  -2   6   0  232.54    4.98 
  -2  -6   0  242.89    4.78 
   2  -6   0  224.29    4.81 
  -2   6  -2   43.35    1.52 
   2   6   2   44.37    1.17 
  -2  -6   2   40.98    1.08 
   2   6   2   47.52    1.57 
  -2  -6   2   42.85    1.51 
  -2  -6   2   44.46    1.46 
  -2   6  -2   41.67    1.05 
   2  -6   2   43.15    1.47 
  -2   6   2   41.73    1.50 
  -2   6   2   44.21    1.19 
   2  -6   2   42.81    1.49 
  -2   6   2   43.38    1.43 
   2   6  -2   44.65    1.50 
  -2  -6  -2   44.10    1.49 
  -2   6   2   43.81    1.24 
   2   6   4   34.52    1.32 
   2   6   4   35.94    1.77 
   2  -6  -4   34.85    1.39 
  -2  -6   4   33.96    1.54 
   2   6   4   34.48    1.13 
  -2   6  -4   32.26    1.69 
  -2  -6   4   33.93    1.56 
   2  -6   4   32.17    1.54 
   2   6  -4   33.24    1.70 
  -2   6   4   32.52    1.29 
  -2  -6  -4   32.66    1.38 
  -2   6   4   30.12    1.68 
   2  -6   4   33.67    1.51 
  -2   6   4   33.44    1.26 
  -2  -6   6   10.19    1.25 
   2   6   6    9.59    0.87 
   2   6   6   10.04    1.42 
  -2  -6   6    8.75    1.16 
   2   6   6    9.05    1.03 
   2  -6  -6   10.00    0.97 
  -2   6  -6   11.57    1.49 
  -2  -6  -6    8.96    0.97 
   2  -6   6   10.57    1.23 
   2  -6   6    9.23    1.11 
  -2   6   6   10.06    1.05 
  -2   6   6   10.49    0.97 
  -2   6   6    9.92    1.41 
   2   6  -6    7.90    1.28 
   2   6   8    3.02    0.85 
  -2   6  -8    3.27    1.39 
  -2  -6   8    1.79    0.89 
  -2  -6   8    1.65    1.02 
   2  -6   8    2.27    0.90 
  -2   6   8    2.30    0.85 
   2  -6   8    2.57    0.95 
   2   6  -8    2.51    1.26 
  -2   6   8    1.94    0.74 
  -2   7  -1   10.55    0.62 
  -2  -7   1   10.32    0.76 
  -2  -7   1    9.85    0.60 
  -2  -7   1    8.95    0.65 
   2  -7  -1    9.94    0.45 
   2   7   1   11.55    0.70 
  -2   7   1   11.33    0.80 
   2  -7   1   12.30    0.82 
  -2   7   1   10.32    0.66 
  -2  -7  -1    9.67    0.79 
  -2  -7  -1   10.87    0.46 
   2  -7   1   12.34    0.74 
   2   7  -1    8.95    0.79 
   2  -7  -3   65.86    2.00 
  -2  -7   3   63.87    2.09 
   2   7   3   64.98    2.22 
  -2  -7   3   67.95    2.12 
   2   7   3   65.93    1.76 
   2   7   3   66.62    1.57 
  -2   7  -3   68.12    2.21 
  -2   7   3   67.33    2.22 
  -2   7   3   66.52    1.77 
  -2   7   3   65.29    1.78 
  -2  -7  -3   67.53    2.05 
   2  -7   3   63.31    2.08 
   2  -7   3   68.11    2.11 
   2   7  -3   68.43    2.20 
  -2   7  -5   10.88    1.30 
  -2  -7   5   12.18    1.20 
   2  -7  -5   11.82    0.97 
  -2  -7   5   12.71    1.24 
   2   7   5   11.73    0.95 
   2   7   5   12.15    0.78 
   2   7   5    9.80    1.25 
  -2   7   5   10.19    0.85 
   2   7  -5   12.55    1.42 
   2  -7   5   13.43    1.31 
  -2   7   5   10.45    1.29 
  -2   7   5   12.42    0.94 
  -2  -7  -5   11.32    1.02 
   2  -7   5   10.45    1.12 
  -2  -7   7    1.79    0.89 
   2   7   7    1.22    0.67 
   2   7   7    0.40    0.97 
  -2  -7   7    1.06    0.81 
   2  -7  -7    2.37    0.71 
   2   7   7    1.68    0.60 
  -2   7  -7    2.73    1.20 
   2   7  -7    1.52    1.08 
  -2  -7  -7    0.47    0.63 
   2  -7   7    2.61    0.94 
   2  -7   7    1.03    0.80 
  -2   7   7    1.68    0.69 
  -2   7   7    2.21    1.10 
  -2   7   7    2.30    0.65 
  -2  -7   9    3.34    1.12 
  -2   7  -9    6.27    1.49 
   2   7   9    5.23    1.10 
  -2  -7   9    2.24    1.08 
   2  -7  -9    6.39    1.54 
   2   7  -9    4.17    1.45 
   2  -7   9    4.27    1.17 
  -2   7   9    6.05    1.20 
  -2  -7  -9    6.04    1.56 
   2  -7   9    3.69    1.32 
  -2   8   0    3.82    0.49 
   2  -8   0    4.54    0.41 
  -2  -8   0    3.87    0.53 
   2   8   0    4.82    0.58 
  -2   8   0    2.66    0.49 
  -2  -8   0    4.74    0.39 
  -2  -8   0    4.74    0.47 
  -2  -8   2   70.82    2.13 
  -2  -8   2   66.59    1.70 
  -2   8  -2   73.92    1.72 
  -2   8  -2   73.25    2.08 
   2   8   2   70.43    2.11 
   2   8   2   71.19    1.64 
  -2  -8   2   72.90    2.07 
  -2   8   2   72.60    2.10 
   2  -8   2   71.77    2.07 
  -2   8   2   72.90    1.70 
   2  -8   2   72.30    2.11 
   2   8  -2   72.68    2.08 
  -2   8   2   73.25    2.11 
  -2  -8  -2   73.32    2.12 
   2   8   4  113.93    3.45 
  -2  -8   4  109.69    3.21 
  -2   8  -4  107.91    3.29 
  -2  -8   4  110.01    3.22 
   2   8   4  115.28    2.59 
   2  -8  -4  108.45    3.03 
   2   8   4  107.10    2.79 
   2  -8   4  109.09    3.18 
   2   8  -4  112.85    3.31 
  -2   8   4  111.48    2.77 
  -2  -8  -4  114.25    3.07 
  -2   8   4  114.77    3.44 
   2  -8   4  102.91    3.17 
  -2   8   4  110.54    2.80 
  -2  -8   6    7.11    1.10 
  -2  -8   6    7.05    1.12 
   2  -8  -6   10.89    1.04 
   2   8   6    7.68    0.75 
   2   8   6    9.03    0.98 
   2   8   6    7.41    1.26 
  -2   8  -6    8.77    1.32 
  -2   8   6    9.89    0.92 
  -2  -8  -6    6.80    0.94 
  -2   8   6    8.73    0.93 
  -2   8   6    7.59    1.29 
   2  -8   6    7.15    1.13 
   2  -8   6    9.30    1.21 
   2   8  -6    8.72    1.40 
  -2  -8   8    1.89    0.96 
   2   8   8    1.12    0.76 
  -2   8  -8    3.20    1.26 
   2   8   8    1.24    1.15 
  -2  -8   8    1.43    0.92 
   2  -8   8    0.70    0.93 
  -2   8   8    1.35    1.17 
   2   8  -8    1.07    1.09 
   2  -8   8    0.08    0.92 
  -2   8   8    2.30    0.84 
  -2  -9   1  123.31    2.85 
   2   9   1  123.26    2.90 
  -2   9  -1  121.07    2.82 
  -2   9  -1  123.17    2.94 
  -2  -9   1  116.20    2.94 
  -2  -9   1  114.25    2.80 
   2  -9  -1  121.29    2.59 
   2  -9   1  120.25    2.87 
  -2   9   1  120.00    2.86 
  -2  -9  -1  122.20    2.65 
  -2   9   1  122.38    3.03 
   2  -9   1  117.98    2.95 
   2   9  -1  117.72    2.95 
  -2  -9  -1  124.82    3.03 
  -2  -9   3    7.27    0.78 
   2   9   3    6.98    0.54 
  -2   9  -3    6.99    0.89 
   2   9   3    7.35    0.86 
   2  -9  -3    9.16    0.85 
  -2  -9   3    6.70    0.82 
  -2   9   3    8.66    0.99 
   2  -9   3    6.27    0.75 
  -2   9   3    7.57    0.56 
  -2  -9  -3    7.79    0.81 
  -2   9   3    7.25    0.63 
   2   9  -3    6.80    0.85 
   2  -9   3    6.98    0.82 
   2   9   5   42.48    1.31 
   2   9   5   40.89    1.53 
   2  -9  -5   38.31    1.69 
  -2   9  -5   40.79    2.07 
  -2  -9   5   38.07    1.92 
   2   9   5   39.84    2.12 
  -2  -9   5   36.80    1.86 
   2   9  -5   43.37    2.10 
  -2   9   5   42.21    1.53 
  -2   9   5   40.61    2.11 
  -2   9   5   40.14    1.48 
   2  -9   5   35.94    1.83 
   2  -9   5   40.80    1.93 
  -2  -9  -5   42.42    1.81 
  -2  -9   7   13.44    1.55 
   2  -9  -7   14.41    1.29 
   2   9   7   15.02    1.25 
  -2  -9   7   15.99    1.67 
   2   9   7   16.64    2.06 
  -2   9  -7   12.97    1.68 
  -2  -9  -7   14.10    1.33 
   2   9  -7   14.20    1.68 
  -2   9   7   14.74    1.97 
   2  -9   7   12.67    1.47 
  -2   9   7   14.98    1.25 
   2  -9   7   17.33    1.77 
  -2   9   7   16.04    1.15 
   2   9   9    4.69    1.05 
  -2  -9   9    4.93    1.27 
  -2   9  -9    9.64    1.86 
  -2  -9   9    4.62    1.30 
   2   9  -9    5.92    1.56 
   2  -9   9    6.46    1.38 
  -2   9   9    5.24    1.09 
   2  -9   9    5.58    1.42 
  -2  10   0   14.92    0.89 
  -2 -10   0   16.10    0.89 
  -2 -10   0   15.78    0.62 
   2 -10   0   15.43    0.70 
  -2  10   0   14.66    0.92 
  -2 -10   0   14.92    0.80 
   2  10   0   16.87    0.93 
   2  10   2   28.70    1.27 
   2 -10  -2   27.00    1.29 
  -2 -10   2   25.76    1.28 
  -2  10  -2   30.49    1.30 
  -2 -10   2   26.36    0.94 
   2 -10  -2   28.22    0.83 
  -2 -10   2   27.68    1.21 
   2  10  -2   26.79    1.29 
   2 -10   2   27.54    1.30 
   2 -10   2   28.06    0.93 
  -2  10   2   28.29    1.26 
  -2 -10  -2   28.76    1.31 
   2 -10   2   27.89    1.22 
  -2 -10   4    3.34    0.70 
   2  10   4    5.59    0.96 
  -2  10  -4    4.22    0.88 
  -2 -10   4    4.20    0.78 
   2  10   4    5.42    0.55 
   2 -10  -4    2.42    0.69 
   2 -10   4    3.81    0.74 
  -2 -10  -4    3.46    0.71 
   2 -10   4    4.46    0.82 
   2  10  -4    4.46    0.91 
  -2  10   4    4.78    0.86 
  -2  10   4    5.26    0.56 
  -2  10   4    3.93    0.53 
  -2  10  -6    5.89    1.20 
   2  10   6    9.76    1.44 
  -2 -10   6    8.03    1.17 
  -2 -10   6    7.89    1.15 
   2  10   6    9.79    0.77 
   2  10   6   10.94    1.02 
   2 -10  -6    6.62    0.98 
   2  10  -6   10.22    1.50 
  -2 -10  -6    8.37    1.06 
  -2  10   6    9.54    1.38 
  -2  10   6   11.05    0.96 
   2 -10   6   10.72    1.29 
   2 -10   6    7.48    1.15 
  -2  10   6    8.68    0.94 
  -2 -10   8    4.05    1.14 
   2  10   8    6.35    1.01 
  -2  10  -8    4.02    1.37 
  -2 -10   8    6.11    1.31 
   2  10   8    5.03    1.47 
   2  10  -8    4.28    1.32 
   2 -10   8    4.84    1.23 
  -2  10   8    6.30    1.05 
  -2  10   8    7.40    1.77 
   2 -10   8    6.84    1.30 
  -2 -11   1    7.28    0.72 
  -2 -11   1    7.31    0.68 
  -2 -11   1    9.26    0.74 
   2 -11  -1    6.13    0.48 
   2  11   1    9.62    0.78 
  -2  11  -1    7.22    0.67 
  -2  11  -1    7.22    0.76 
  -2  11   1    7.82    0.74 
   2  11  -1    9.18    0.90 
  -2 -11  -1    8.25    0.60 
   2 -11   1    8.27    0.77 
   2 -11   1    7.05    0.64 
  -2  11   1    5.79    0.72 
  -2 -11  -1    7.39    0.77 
  -2  11  -3   10.67    1.09 
   2  11   3   10.56    1.05 
  -2 -11   3    9.94    0.55 
  -2 -11   3   11.54    1.00 
  -2 -11   3   10.41    1.03 
   2  11   3   10.14    0.51 
   2 -11  -3    8.92    0.92 
  -2  11   3   10.12    1.03 
   2  11  -3   11.05    1.10 
  -2  11   3    9.59    0.57 
   2 -11   3   11.33    1.08 
  -2 -11  -3    9.90    0.97 
   2 -11   3    9.63    0.94 
   2 -11   3    9.95    0.49 
   2 -11  -5    1.89    0.68 
  -2 -11   5    3.52    0.83 
  -2  11  -5    3.40    1.05 
   2  11   5    4.90    1.03 
   2  11   5    3.06    0.56 
  -2 -11   5    2.58    0.81 
   2  11  -5    3.51    1.02 
  -2  11   5    4.51    0.61 
  -2 -11  -5    2.92    0.75 
  -2  11   5    3.64    0.59 
  -2  11   5    4.17    0.98 
   2 -11   5    3.19    0.78 
   2 -11   5    4.55    0.95 
  -2 -11   7    6.50    1.20 
   2  11   7    6.91    1.43 
  -2 -11   7    6.92    1.27 
   2  11   7    6.62    0.89 
  -2  11  -7    6.13    1.32 
   2 -11  -7    5.51    0.99 
  -2  11   7    4.63    1.26 
  -2  11   7    6.89    0.94 
  -2 -11  -7    6.15    1.06 
   2 -11   7    5.05    1.11 
   2  11  -7    4.80    1.19 
   2 -11   7    4.88    1.11 
  -2 -11   9    0.14    1.05 
  -2  11  -9    2.03    1.29 
  -2 -11   9    0.18    0.92 
   2  11   9    0.70    1.24 
   2 -11   9   -0.66    0.88 
   2  11  -9    1.38    1.26 
   2 -11   9    0.64    1.08 
  -2  11   9    0.63    1.41 
   2 -12   0    0.95    0.35 
   2 -12   0    0.34    0.48 
  -2 -12   0    0.28    0.40 
  -2 -12   0    0.14    0.26 
  -2  12   0    0.57    0.47 
  -2 -12   0    0.35    0.47 
   2  12   0    0.91    0.48 
  -2 -12   2   10.67    0.97 
  -2 -12   2   10.41    0.70 
  -2  12  -2   11.38    1.01 
   2  12   2   11.15    0.90 
   2 -12  -2   10.69    0.51 
  -2 -12   2   10.34    0.87 
   2 -12  -2   11.51    0.97 
  -2  12   2   12.36    0.92 
  -2 -12  -2   12.11    1.01 
   2 -12   2   11.76    1.02 
   2 -12   2   11.50    0.68 
   2  12  -2   10.12    1.02 
   2 -12   2   11.85    0.91 
   2  12   4    9.09    0.62 
   2  12   4   10.21    1.24 
  -2 -12   4    6.66    0.90 
  -2  12  -4    8.47    1.05 
   2 -12  -4    6.82    0.93 
  -2 -12   4    7.94    0.98 
  -2  12   4    8.48    0.64 
   2 -12   4    8.92    1.02 
   2  12  -4    8.91    1.09 
   2 -12   4    8.60    0.98 
  -2 -12  -4    8.38    0.97 
  -2  12   4    7.42    1.06 
  -2 -12   6    1.36    0.80 
   2  12   6    1.01    0.82 
   2  12   6    0.67    0.51 
  -2 -12   6    1.26    0.81 
  -2  12  -6    0.76    1.00 
   2 -12  -6    0.90    0.71 
  -2 -12  -6    0.91    0.75 
   2 -12   6    0.81    0.72 
   2  12  -6    0.74    0.96 
  -2  12   6    0.60    0.52 
   2 -12   6    1.08    0.80 
  -2  12   6    1.12    0.86 
  -2  12   6    0.48    0.52 
  -2 -12   8    9.63    1.50 
  -2  12  -8   12.72    1.85 
   2 -12  -8    6.63    1.18 
  -2 -12   8    9.80    1.51 
   2  12   8   13.29    2.14 
  -2  12   8   16.02    1.36 
   2 -12   8   12.50    1.76 
   2  12  -8   14.45    2.02 
   2 -12   8   13.48    1.75 
  -2  12   8   12.41    1.95 
  -2 -12  -8   11.97    1.44 
  -2  13  -1   99.52    2.74 
  -2 -13   1   97.72    2.69 
   2 -13  -1   97.94    2.78 
   2  13   1   98.39    2.65 
   2 -13  -1  100.78    2.22 
  -2 -13   1   99.37    2.50 
  -2 -13   1  100.56    2.59 
  -2  13   1   99.98    2.63 
   2 -13   1   96.57    2.71 
  -2 -13  -1   98.00    2.77 
  -2 -13  -1   99.27    2.39 
   2 -13   1  100.73    2.58 
   2  13  -1   94.34    2.74 
   2 -13   1   98.53    2.54 
  -2 -13   3   67.36    2.21 
  -2 -13   3   65.33    2.31 
  -2  13  -3   64.90    2.22 
   2 -13  -3   65.71    2.25 
  -2 -13   3   64.76    1.72 
   2  13   3   64.93    2.28 
   2 -13   3   65.02    2.28 
   2 -13   3   63.69    2.20 
   2  13  -3   64.09    2.23 
  -2  13   3   65.72    2.29 
  -2 -13  -3   69.29    2.31 
   2 -13   3   65.95    1.67 
  -2  13  -5    9.74    1.37 
  -2 -13   5    9.64    1.18 
   2  13   5    9.06    1.33 
   2 -13  -5    7.34    1.00 
  -2 -13   5    8.10    1.14 
   2  13   5    8.77    0.70 
   2 -13   5    8.70    1.21 
   2 -13   5    8.22    1.11 
  -2  13   5    8.23    0.73 
  -2  13   5    8.25    1.33 
   2  13  -5    4.23    1.00 
  -2 -13  -5    7.10    1.03 
   2  13   7    7.03    1.46 
  -2  13  -7    7.40    1.42 
  -2 -13   7    5.22    1.16 
   2 -13  -7    6.34    1.11 
   2  13   7    8.80    0.95 
  -2 -13   7    8.91    1.41 
   2 -13   7    8.42    1.39 
   2  13  -7    7.74    1.41 
  -2  13   7    9.52    1.69 
  -2  13   7    8.35    0.97 
   2 -13   7    7.39    1.31 
  -2 -13  -7    7.15    1.16 
  -2  13  -9    3.48    1.41 
   2  13   9    2.67    1.57 
  -2 -13   9    1.97    1.19 
  -2 -13   9    0.43    1.07 
   2 -13   9    2.65    1.16 
   2 -13   9    1.86    1.22 
   2  13  -9    3.39    1.39 
  -2  13   9    2.83    1.53 
  -2  14   0   15.99    1.05 
   2 -14   0   15.20    0.75 
  -2 -14   0   15.44    1.05 
  -2 -14   0   13.18    0.63 
   2  14   0   14.54    1.06 
  -2 -14   0   14.33    0.91 
   2 -14   0   13.68    1.00 
  -2 -14   2   17.53    0.90 
  -2 -14   2   17.32    1.17 
  -2 -14   2   19.79    1.07 
   2 -14  -2   18.08    1.20 
   2  14   2   18.75    1.12 
  -2  14  -2   16.78    1.22 
  -2 -14  -2   18.32    1.21 
   2 -14   2   17.79    1.21 
   2 -14   2   16.38    1.05 
  -2  14   2   19.55    1.13 
   2 -14   2   18.64    0.89 
  -2 -14  -2   19.49    0.77 
   2  14  -2   19.05    1.25 
   2  14   4    3.44    0.87 
  -2 -14   4    2.07    0.70 
   2 -14  -4    3.74    0.83 
  -2 -14   4    1.33    0.69 
  -2  14  -4    2.27    0.83 
  -2 -14  -4    3.05    0.79 
   2 -14   4    2.52    0.73 
  -2  14   4    2.25    0.78 
   2 -14   4    2.71    0.75 
   2  14  -4    3.07    0.97 
  -2  14   4    3.07    0.43 
  -2 -14   6    0.95    0.76 
  -2  14  -6    0.18    0.87 
  -2 -14   6    0.12    0.75 
   2  14   6    1.16    0.48 
   2 -14  -6    0.94    0.72 
   2  14   6    1.37    0.92 
  -2 -14  -6    2.13    0.87 
  -2  14   6    2.10    0.54 
   2 -14   6    1.01    0.84 
   2 -14   6    0.58    0.71 
   2  14  -6    2.25    0.94 
  -2  14   6   -0.30    0.79 
  -2 -14   8    1.80    0.98 
  -2  14  -8    2.44    1.20 
  -2 -14   8   -0.18    0.94 
   2  14   8    1.77    1.32 
   2 -14  -8   -0.13    0.84 
  -2 -14  -8   -0.87    0.84 
   2 -14   8    0.66    1.05 
   2 -14   8    0.55    1.01 
  -2  14   8    0.53    1.19 
   2  14  -8    1.57    1.11 
  -2 -15   1   31.30    1.18 
  -2 -15   1   32.25    1.33 
   2 -15  -1   31.98    0.97 
  -2 -15   1   33.86    1.44 
  -2  15  -1   34.37    1.55 
   2  15   1   34.69    1.43 
   2 -15  -1   30.81    1.46 
   2 -15   1   34.31    1.35 
   2 -15   1   33.75    1.50 
  -2 -15  -1   31.14    1.48 
   2 -15   1   30.26    1.24 
   2  15  -1   34.51    1.59 
  -2 -15  -1   32.52    1.18 
  -2  15   1   34.69    1.41 
  -2 -15   3   -0.03    0.57 
  -2 -15   3    0.09    0.48 
  -2  15  -3    0.40    0.67 
  -2 -15   3    0.79    0.37 
   2  15   3    0.56    0.59 
   2 -15  -3    0.20    0.59 
  -2  15   3   -0.09    0.56 
   2 -15   3    0.66    0.52 
   2 -15   3    0.00    0.31 
   2  15  -3    0.62    0.67 
   2 -15   3    0.82    0.58 
  -2 -15  -3   -0.53    0.57 
  -2  15  -5    6.64    1.14 
   2  15   5    8.81    0.65 
  -2 -15   5    6.23    1.04 
   2  15   5    6.93    1.17 
   2 -15  -5    6.51    1.01 
  -2 -15   5    5.08    0.95 
  -2  15   5    9.52    1.39 
   2 -15   5    6.97    1.08 
   2  15  -5    6.91    1.22 
  -2  15   5    7.28    0.70 
  -2 -15  -5    7.75    1.09 
   2 -15   5    5.84    1.01 
  -2 -15   7   26.93    2.10 
   2 -15  -7   25.87    1.83 
  -2 -15   7   25.40    2.03 
  -2  15  -7   25.12    2.07 
   2  15   7   27.30    2.32 
  -2  15   7   23.02    2.21 
   2 -15   7   28.34    2.09 
   2 -15   7   24.56    2.00 
  -2 -15  -7   26.43    1.85 
   2  15  -7   24.18    2.04 
  -2  15  -9    2.70    1.34 
  -2 -15   9    3.64    1.31 
  -2 -15   9    2.90    1.23 
   2  15   9   -0.09    1.37 
   2 -15   9    2.29    1.31 
   2  15  -9    1.18    1.15 
  -2  15   9    0.65    1.41 
   2 -15   9    3.82    1.37 
   2 -16   0    5.42    0.76 
   2 -16   0    4.20    0.49 
  -2 -16   0    5.64    0.65 
  -2 -16   0    6.60    0.80 
  -2 -16   0    4.84    0.44 
   2  16   0    5.50    0.85 
   2 -16   0    5.74    0.72 
  -2  16   0    4.95    0.78 
  -2 -16   2    9.19    0.95 
   2  16   2    8.92    0.99 
  -2 -16   2    8.00    0.75 
  -2  16  -2    7.92    0.98 
  -2 -16   2    8.69    0.85 
   2 -16  -2    9.18    1.04 
  -2  16   2    8.51    0.93 
  -2 -16  -2    7.87    0.63 
   2 -16   2    6.19    0.76 
  -2 -16  -2   10.37    1.06 
   2  16  -2    8.52    1.07 
   2 -16   2    8.09    0.91 
   2 -16   2    8.58    0.76 
  -2  16  -4    8.36    1.23 
   2 -16  -4    5.69    0.97 
   2 -16  -4    7.38    0.57 
   2  16   4    8.18    1.15 
  -2 -16   4    6.26    0.53 
  -2 -16   4    6.85    0.95 
  -2 -16   4    4.75    0.93 
   2  16  -4    6.38    1.08 
  -2  16   4    8.60    1.21 
   2 -16   4    5.77    0.95 
   2 -16   4    5.53    0.90 
  -2 -16  -4    5.65    0.96 
   2  16   6    6.68    1.33 
  -2 -16   6    9.06    1.32 
   2 -16  -6    8.43    1.17 
  -2  16  -6    8.73    1.51 
  -2 -16   6    5.85    1.11 
  -2 -16  -6    8.54    1.23 
   2  16  -6    7.37    1.40 
  -2  16   6    8.01    1.51 
   2 -16   6    7.94    1.28 
  -2  16   6   10.03    1.09 
   2 -16   6    6.72    1.21 
  -2 -16   8    2.85    1.29 
  -2 -16   8    1.85    1.11 
   2 -16  -8    2.60    1.02 
   2  16   8   -0.31    0.98 
  -2  16  -8    2.34    1.14 
   2  16  -8    1.52    1.22 
  -2  16   8    0.59    1.25 
   2 -16   8    2.64    1.16 
   2 -16   8    0.65    1.06 
  -2 -16  -8    1.72    1.01 
   2  17   1   39.20    1.64 
   2 -17  -1   41.23    1.73 
  -2  17  -1   39.07    1.78 
  -2 -17   1   40.89    1.39 
  -2 -17   1   38.97    1.62 
  -2 -17   1   40.44    1.58 
  -2 -17  -1   39.55    1.39 
   2  17  -1   40.28    1.80 
   2 -17   1   38.99    1.56 
   2 -17   1   42.06    1.70 
   2 -17   1   42.86    1.48 
  -2 -17  -1   38.81    1.72 
  -2  17   1   40.07    1.63 
   2 -17  -3   32.14    1.71 
  -2 -17   3   31.07    1.70 
  -2 -17   3   36.82    1.62 
   2  17   3   31.72    1.65 
  -2 -17   3   33.35    1.25 
  -2  17  -3   31.90    1.76 
   2 -17   3   32.63    1.59 
   2 -17   3   32.92    1.21 
   2 -17   3   29.67    1.68 
   2  17  -3   34.34    1.81 
  -2  17   3   31.56    1.66 
  -2 -17  -3   32.76    1.73 
   2  17   5   13.88    1.53 
  -2 -17   5   15.36    1.42 
  -2  17  -5   16.27    1.65 
  -2 -17   5   14.08    1.45 
   2 -17  -5   12.62    1.34 
  -2  17   5   12.85    1.56 
   2  17  -5   10.82    1.38 
  -2  17   5   15.00    0.82 
   2 -17   5   15.28    1.43 
   2 -17   5   14.55    1.49 
  -2 -17  -5   12.77    1.36 
  -2  17  -7    0.38    1.04 
   2  17   7    1.91    1.12 
   2 -17  -7    2.47    0.93 
  -2 -17   7    0.06    0.88 
  -2 -17   7    1.33    1.05 
   2  17  -7    0.67    1.08 
  -2 -17  -7    1.59    0.95 
   2 -17   7    1.12    0.93 
   2 -17   7   -0.30    0.91 
  -2  17   7    0.69    1.11 
  -2 -17   9    6.67    1.64 
  -2  17  -9    4.47    1.53 
   2  17   9    1.10    1.48 
  -2 -17   9    2.63    1.23 
  -2  17   9    4.82    1.82 
   2 -17   9    3.73    1.47 
   2 -17   9    4.31    1.46 
   2  17  -9    2.68    1.44 
   2 -18   0   21.25    1.29 
   2 -18   0   21.57    1.26 
  -2 -18   0   20.25    1.25 
  -2  18   0   19.76    1.34 
   2 -18   0   22.52    0.95 
  -2 -18   0   21.67    0.82 
  -2 -18   0   20.50    1.13 
   2  18   0   21.21    1.38 
  -2  18  -2   12.36    1.28 
   2  18   2   10.45    1.02 
  -2 -18   2   10.99    0.92 
   2 -18  -2   11.47    1.17 
  -2 -18   2   10.17    1.06 
  -2 -18   2    9.22    0.88 
   2  18  -2    9.00    1.10 
  -2 -18  -2   10.53    1.14 
   2 -18   2   10.89    1.08 
  -2  18   2   11.50    1.02 
   2 -18   2   11.62    0.89 
   2 -18   2   11.36    0.94 
  -2 -18  -2   10.04    0.73 
   2 -18  -4    1.61    0.78 
  -2  18  -4    2.65    0.95 
   2  18   4    2.40    0.82 
  -2 -18   4    3.25    0.89 
  -2 -18   4    0.69    0.41 
  -2 -18   4    2.62    0.75 
   2 -18   4    1.35    0.67 
   2 -18   4    2.01    0.42 
  -2  18   4    2.84    0.87 
   2  18  -4    3.31    1.04 
  -2 -18  -4    2.34    0.87 
   2 -18   4    3.76    0.90 
   2 -18  -6    1.13    0.77 
  -2  18  -6    2.32    1.14 
   2  18   6    1.01    1.00 
  -2 -18   6    0.90    0.85 
  -2 -18   6    1.08    0.84 
   2  18  -6   -0.03    1.07 
   2 -18   6    1.68    0.88 
  -2 -18  -6    1.95    0.91 
   2 -18   6    1.21    0.86 
  -2  18   6    2.12    1.05 
  -2  18  -8    6.38    1.57 
  -2 -18   8    6.61    1.56 
   2 -18  -8    6.36    1.33 
   2  18   8    8.96    1.82 
  -2 -18   8    5.57    1.43 
  -2 -18  -8    6.64    1.40 
   2  18  -8    6.31    1.52 
  -2  18   8   11.81    2.19 
   2 -18   8    5.91    1.52 
   2 -18   8    6.45    1.47 
   2 -19  -1   10.93    1.14 
   2  19   1   11.04    1.07 
  -2 -19   1   10.66    1.01 
  -2 -19   1   11.04    0.79 
  -2 -19   1   10.52    1.00 
  -2  19  -1   11.80    1.28 
  -2  19   1   11.56    1.09 
   2 -19   1   10.09    1.00 
  -2 -19  -1   10.35    0.86 
  -2 -19  -1   12.60    1.17 
   2  19  -1   12.81    1.41 
   2 -19   1    9.80    0.82 
   2 -19   1   11.99    1.02 
  -2 -19   3   66.39    2.06 
   2  19   3   67.85    2.53 
  -2 -19   3   68.53    2.58 
  -2  19  -3   67.54    2.62 
  -2 -19   3   68.99    2.39 
   2 -19  -3   69.05    2.60 
   2 -19   3   69.61    2.04 
  -2  19   3   63.76    2.46 
   2  19  -3   69.07    2.66 
   2 -19   3   66.61    2.56 
   2 -19   3   67.42    2.41 
  -2 -19  -3   69.80    2.61 
  -2 -19  -3   68.89    1.78 
  -2 -19   5    8.42    1.17 
   2 -19  -5    8.93    1.25 
   2  19   5   11.16    1.55 
  -2 -19   5   10.12    1.31 
  -2  19  -5    9.51    1.33 
  -2 -19  -5    8.54    1.22 
   2  19  -5    7.98    1.26 
  -2  19   5    9.29    1.45 
   2 -19   5   10.61    1.38 
   2 -19   5    6.82    1.10 
  -2 -19   7    2.99    1.10 
   2 -19  -7    3.59    1.06 
  -2 -19   7    0.55    0.95 
   2  19   7    2.74    1.28 
  -2  19  -7    3.00    1.28 
  -2 -19  -7    2.64    1.06 
   2 -19   7    1.76    1.06 
   2  19  -7    2.71    1.22 
   2 -19   7    2.95    1.14 
  -2  19   7    4.38    1.41 
  -2 -20   0    9.25    0.89 
  -2 -20   0    9.70    1.06 
   2  20   0   10.70    1.18 
   2 -20   0    9.31    1.04 
   2 -20   0    7.86    0.68 
  -2  20   0    9.51    1.16 
   2 -20   0    9.32    0.95 
  -2 -20   0    7.04    0.55 
  -2 -20   2   16.05    1.31 
  -2  20  -2   16.61    1.53 
   2 -20  -2   15.74    1.35 
  -2 -20   2   16.05    1.08 
  -2 -20   2   16.47    1.09 
   2  20   2   16.38    1.25 
   2 -20   2   17.85    1.14 
  -2  20   2   17.66    1.24 
   2 -20   2   15.59    1.08 
   2  20  -2   14.87    1.49 
  -2 -20  -2   19.06    0.95 
  -2 -20  -2   16.63    1.39 
   2 -20   2   16.04    1.34 
  -2 -20   4    0.78    0.66 
  -2 -20   4    1.10    0.78 
   2  20   4    1.74    0.81 
   2 -20  -4    0.76    0.77 
  -2  20  -4    1.69    0.99 
  -2 -20   4    1.58    0.47 
  -2 -20  -4    1.18    0.81 
   2  20  -4    2.61    1.08 
   2 -20   4    2.54    0.50 
   2 -20   4    1.62    0.84 
   2 -20   4    2.41    0.76 
  -2  20   4    2.28    0.80 
   2 -20  -6    2.03    0.99 
  -2 -20   6    5.12    1.15 
  -2 -20   6    1.17    0.92 
   2  20   6    2.23    1.09 
  -2  20  -6    3.40    1.26 
  -2  20   6    2.67    1.16 
   2 -20   6    2.20    0.98 
  -2 -20  -6    2.08    0.97 
   2  20  -6    3.65    1.21 
   2 -20   6    2.31    1.08 
   2 -20  -8    0.03    0.90 
  -2 -20   8   -0.54    0.94 
   2  20   8   -0.35    1.12 
  -2 -20   8   -0.24    0.99 
  -2  20  -8   -0.21    1.17 
  -2  20   8   -0.48    1.15 
   2 -20   8   -0.89    1.03 
   2  20  -8    0.03    1.21 
  -2 -20  -8    1.74    1.10 
   2 -20   8   -0.30    1.04 
   2 -21  -1    6.93    1.01 
   2 -21  -1    6.90    0.84 
  -2 -21   1    5.90    0.82 
  -2  21  -1    8.46    1.25 
   2  21   1    6.21    0.95 
  -2 -21   1    7.84    0.93 
  -2 -21   1    7.97    0.73 
  -2  21   1    6.47    0.95 
   2 -21   1    7.87    0.99 
   2 -21   1    5.88    0.84 
   2  21  -1    6.01    1.10 
  -2 -21  -1    6.08    0.97 
  -2 -21  -1    5.81    0.72 
   2 -21   1    7.22    0.75 
   2 -21  -3   15.78    1.42 
  -2 -21   3   17.17    1.47 
  -2 -21   3   15.36    1.20 
   2  21   3   15.44    1.35 
  -2  21  -3   15.38    1.61 
  -2 -21   3   15.41    1.06 
   2 -21   3   14.70    1.43 
  -2 -21  -3   14.57    1.44 
   2 -21   3   16.78    1.28 
  -2  21   3   17.23    1.40 
   2 -21   3   15.37    1.05 
   2  21  -3   16.82    1.65 
  -2 -21  -3   14.51    0.82 
   2 -21  -5    0.80    0.83 
  -2  21  -5    0.26    0.94 
  -2 -21   5    0.23    0.77 
  -2 -21   5    1.64    0.79 
   2  21   5   -0.22    0.77 
  -2 -21  -5    0.56    0.80 
   2 -21   5    0.40    0.79 
  -2  21   5    0.11    0.76 
   2 -21   5    1.62    0.79 
   2  21  -5    0.02    0.99 
   2 -21  -7    1.80    1.00 
  -2 -21   7    1.04    0.96 
  -2 -21   7    1.74    1.14 
  -2  21  -7    2.04    1.37 
   2  21   7    2.39    1.32 
   2 -21   7    0.58    1.02 
  -2  21   7    1.72    1.36 
  -2 -21  -7    0.72    0.99 
   2  21  -7    1.28    1.11 
   2 -21   7    1.41    0.99 
  -2 -22   0    0.50    0.52 
   2 -22   0   -0.13    0.57 
  -2  22   0    1.59    0.78 
  -2 -22   0    0.42    0.31 
   2 -22   0    0.76    0.37 
  -2 -22   0   -0.96    0.59 
   2  22   0    0.30    0.67 
   2 -22   0    0.30    0.65 
   2  22   2    2.90    0.85 
  -2  22  -2    1.35    0.84 
  -2 -22   2    0.89    0.66 
   2 -22  -2    2.15    0.83 
  -2 -22   2    1.88    0.58 
  -2 -22   2    2.05    0.65 
   2  22  -2    1.25    0.87 
  -2 -22  -2    2.13    0.51 
  -2 -22  -2    2.20    0.84 
  -2  22   2    1.61    0.70 
   2 -22   2    2.29    0.62 
   2 -22   2    1.77    0.75 
   2 -22   2    2.34    0.65 
   2  22   4    1.50    0.78 
   2 -22  -4    0.82    0.82 
  -2 -22   4    0.93    0.81 
  -2  22  -4    1.90    1.10 
  -2 -22   4    1.28    0.67 
   2 -22   4    0.94    0.63 
   2 -22   4    1.06    0.86 
  -2 -22  -4    2.28    0.90 
   2  22  -4    0.38    0.93 
  -2  22   4    1.60    0.81 
  -2  22  -6    0.67    1.05 
  -2 -22   6    1.07    0.90 
   2  22   6   -0.61    0.87 
  -2 -22   6    1.92    1.01 
   2 -22  -6    1.48    0.93 
  -2  22   6    1.03    1.04 
   2 -22   6    1.43    0.90 
   2 -22   6   -0.34    0.88 
  -2 -22  -6    0.92    0.90 
   2  22  -6    2.71    1.19 
   2  22   8   -0.73    1.14 
   2 -22  -8    2.12    1.21 
  -2 -22   8    1.64    1.15 
  -2  22  -8    2.19    1.42 
  -2 -22   8    0.07    1.06 
   2 -22   8    0.18    1.03 
  -2 -22  -8   -0.45    1.04 
  -2  22   8    1.90    1.44 
   2 -22   8    0.29    1.11 
   2  22  -8    1.31    1.26 
   2  23   1   20.35    1.46 
   2 -23  -1   22.24    1.37 
  -2 -23   1   22.02    1.08 
  -2 -23   1   21.74    1.45 
  -2  23  -1   23.83    1.78 
   2 -23  -1   22.74    1.60 
  -2 -23   1   22.17    1.44 
   2 -23   1   21.29    1.50 
   2 -23   1   21.94    1.16 
   2  23  -1   20.93    1.68 
  -2 -23  -1   21.44    1.23 
  -2  23   1   20.85    1.45 
   2 -23   1   22.59    1.44 
  -2 -23  -1   20.96    1.61 
  -2  23  -3   13.55    1.64 
   2 -23  -3   12.38    1.41 
  -2 -23   3   14.27    1.19 
  -2 -23   3   14.04    1.43 
  -2 -23   3   11.49    1.05 
   2  23   3   14.18    1.39 
  -2 -23  -3   13.68    1.48 
   2 -23   3   12.88    1.21 
  -2  23   3   13.13    1.38 
   2 -23   3   13.07    1.39 
   2  23  -3   12.16    1.53 
   2 -23   3   13.28    1.06 
  -2 -23   5    0.79    0.89 
   2  23   5    0.80    0.82 
  -2 -23   5    1.09    0.76 
   2 -23  -5    2.00    0.96 
  -2  23  -5    1.55    1.17 
   2  23  -5    2.41    1.15 
  -2 -23  -5    1.22    0.93 
  -2  23   5    2.39    0.98 
   2 -23   5    0.92    0.75 
   2 -23   5    0.76    0.88 
  -2  23  -7    0.46    1.27 
  -2 -23   7    0.75    1.07 
   2 -23  -7    1.35    1.00 
   2  23   7    1.13    1.25 
  -2 -23   7    1.23    0.99 
   2 -23   7    0.15    0.97 
  -2  23   7   -0.15    1.15 
   2  23  -7    0.09    1.13 
   2 -23   7    1.45    1.10 
  -2 -23  -7    1.49    1.06 
   2 -24   0    9.02    1.12 
  -2 -24   0    6.93    0.59 
  -2 -24   0    5.74    1.02 
   2 -24   0    7.10    0.94 
   2 -24   0    8.83    0.72 
   2  24   0   10.82    1.44 
  -2  24   0    7.32    1.22 
  -2 -24   0    9.63    1.00 
  -2 -24   2   -0.36    0.60 
   2 -24  -2   -0.10    0.68 
   2  24   2   -0.15    0.62 
   2 -24  -2    0.49    0.58 
  -2 -24   2    0.42    0.49 
  -2 -24   2   -0.34    0.57 
  -2  24  -2    0.16    0.85 
   2 -24   2   -0.29    0.56 
  -2  24   2    0.59    0.65 
   2 -24   2    0.56    0.51 
   2  24  -2   -0.16    0.78 
  -2 -24  -2    0.05    0.75 
   2 -24   2    0.88    0.71 
  -2 -24  -2   -0.43    0.42 
   2 -24  -4    1.29    0.87 
  -2 -24   4    0.64    0.80 
  -2  24  -4    0.03    0.97 
   2  24   4   -0.26    0.69 
  -2 -24   4    1.31    0.70 
  -2 -24  -4    1.48    0.87 
   2 -24   4    1.48    0.90 
   2  24  -4    0.40    1.01 
   2 -24   4   -0.23    0.60 
  -2  24   4    0.73    0.84 
   2  24   6    0.15    1.03 
  -2  24  -6    2.34    1.29 
   2 -24  -6    1.03    0.93 
  -2 -24   6    1.32    0.93 
  -2 -24   6    0.93    0.98 
  -2 -24  -6   -0.10    0.89 
   2  24  -6    0.14    1.10 
   2 -24   6    0.75    0.95 
   2 -24   6    0.87    0.86 
  -2  24   6    2.70    1.21 
  -2  24  -8   -0.11    1.39 
  -2 -24   8    0.69    1.15 
   2  24   8    2.53    1.62 
   2 -24  -8    1.79    1.18 
  -2 -24   8    2.01    1.30 
  -2  24   8    3.10    1.61 
   2  24  -8    1.51    1.42 
   2 -24   8    2.47    1.23 
   2 -24   8   -0.04    1.09 
  -2 -24  -8    1.74    1.21 
   2  25   1    3.46    0.93 
  -2 -25   1    3.71    0.82 
  -2  25  -1    3.10    1.03 
   2 -25  -1    3.49    0.95 
  -2 -25   1    1.83    0.50 
   2 -25  -1    2.45    0.72 
  -2 -25   1    3.18    0.84 
   2 -25   1    4.32    0.86 
  -2 -25  -1    3.10    0.65 
  -2  25   1    3.72    0.95 
  -2 -25  -1    1.96    0.87 
   2 -25   1    3.59    0.85 
   2  25  -1    3.74    1.08 
   2 -25   1    2.99    0.58 
   2  25   3    4.19    0.99 
  -2  25  -3    4.69    1.22 
  -2 -25   3    5.50    0.84 
  -2 -25   3    5.57    1.10 
   2 -25  -3    5.77    1.13 
  -2 -25   3    4.40    0.82 
  -2  25   3    4.61    1.06 
  -2 -25  -3    4.50    1.08 
   2 -25   3    4.70    0.85 
   2  25  -3    3.01    1.15 
   2 -25   3    4.54    0.77 
   2 -25   3    4.72    1.04 
  -2 -25   5    3.52    1.12 
   2 -25  -5    2.36    1.01 
  -2 -25   5    3.71    0.99 
  -2  25  -5    5.45    1.40 
   2  25   5    3.97    1.20 
   2 -25   5    4.13    1.05 
  -2 -25  -5    5.11    1.21 
  -2  25   5    5.15    1.30 
   2  25  -5    3.69    1.32 
   2 -25   5    3.31    1.11 
   2 -25  -7    1.19    1.02 
  -2 -25   7    1.13    1.09 
  -2 -25   7   -0.21    0.93 
   2  25   7    0.23    1.20 
  -2  25  -7   -0.11    1.26 
  -2  25   7    2.49    1.41 
   2 -25   7    2.13    1.17 
   2 -25   7    1.04    1.19 
  -2 -25  -7    0.59    1.06 
   2  25  -7    1.40    1.30 
  -2 -26   0    0.43    0.70 
  -2  26   0    0.15    0.78 
  -2 -26   0    0.12    0.56 
   2  26   0   -0.29    0.78 
   2 -26   0    0.25    0.70 
   2 -26   0   -0.04    0.35 
   2 -26   0   -0.43    0.60 
   2 -26  -2    3.31    0.75 
  -2  26  -2    3.71    1.15 
  -2 -26   2    4.50    0.90 
   2 -26  -2    4.36    1.02 
  -2 -26   2    4.34    0.94 
  -2 -26   2    3.75    0.71 
   2  26   2    3.44    0.93 
  -2 -26  -2    3.62    1.00 
  -2 -26  -2    2.90    0.64 
   2 -26   2    2.75    0.70 
   2 -26   2    4.76    0.99 
  -2  26   2    4.42    1.00 
   2 -26   2    2.93    0.81 
   2  26  -2    3.74    1.16 
   2 -26  -4    1.26    0.91 
  -2  26  -4    1.52    1.25 
  -2 -26   4    3.52    1.02 
   2  26   4    2.31    1.02 
  -2 -26   4    3.14    0.82 
  -2  26   4    2.57    1.03 
   2 -26   4    2.38    0.81 
   2  26  -4    2.26    1.28 
  -2 -26  -4    2.16    1.01 
   2 -26   4    2.28    0.94 
   2 -26  -6    3.99    1.19 
   2  26   6    2.65    1.21 
  -2 -26   6    2.11    1.13 
  -2 -26   6    2.79    1.03 
  -2  26  -6    1.46    1.37 
  -2 -26  -6    0.81    1.01 
  -2  26   6    2.85    1.26 
   2 -26   6    2.46    1.07 
   2  26  -6    1.61    1.30 
   2 -26   6    3.07    1.21 
  -2 -27   1    0.18    0.41 
  -2 -27   1    0.45    0.70 
  -2 -27   1   -0.23    0.56 
   2 -27  -1    0.54    0.62 
   2  27   1    0.21    0.70 
  -2  27  -1    0.34    0.88 
   2 -27  -1   -0.05    0.79 
  -2 -27  -1   -0.66    0.77 
  -2 -27  -1   -0.46    0.49 
  -2  27   1    0.49    0.74 
   2 -27   1    0.09    0.67 
   2  27  -1    0.10    0.83 
   2 -27   1    0.78    0.68 
   2 -27   1    0.18    0.47 
   2  27   3    0.46    0.78 
  -2 -27   3   -0.38    0.54 
   2 -27  -3    0.39    0.82 
  -2  27  -3    0.31    1.10 
  -2 -27   3   -0.62    0.50 
  -2 -27   3    1.10    0.78 
  -2 -27  -3    1.99    0.94 
   2  27  -3    0.97    1.09 
   2 -27   3    1.21    0.65 
   2 -27   3    2.03    0.67 
  -2  27   3    0.22    0.75 
   2 -27   3   -0.36    0.71 
   2 -27  -5    6.17    1.26 
  -2  27  -5    6.48    1.67 
   2  27   5    4.98    1.28 
  -2 -27   5    5.68    1.14 
  -2 -27   5    6.56    1.36 
  -2  27   5    7.45    1.60 
   2 -27   5    5.94    1.12 
   2  27  -5    5.99    1.52 
   2 -27   5    8.91    1.51 
  -2 -27  -5    3.38    1.12 
   2 -27  -7    3.66    1.20 
  -2 -27   7    1.69    1.23 
  -2 -27   7    5.33    1.38 
   2  27   7    4.66    1.72 
  -2  27  -7    2.72    1.59 
   2 -27   7    3.86    1.26 
  -2 -27  -7    3.68    1.33 
  -2  27   7    4.73    1.66 
   2  27  -7    0.82    1.39 
   2 -27   7    1.09    1.16 
  -2 -28   0    1.43    0.85 
  -2  28   0   -0.04    0.85 
  -2 -28   0    0.35    0.58 
   2  28   0    0.44    0.92 
   2 -28   0    0.22    0.66 
   2 -28   0    0.84    0.74 
   2  28   2    4.37    1.04 
   2 -28  -2    2.87    1.02 
  -2 -28   2    5.97    1.00 
  -2  28  -2    3.75    1.18 
   2 -28  -2    4.09    0.83 
  -2 -28   2    5.06    1.01 
  -2 -28   2    6.10    0.84 
  -2 -28  -2    5.01    0.79 
   2  28  -2    5.17    1.36 
   2 -28   2    4.09    0.91 
   2 -28   2    5.85    0.88 
  -2 -28  -2    3.74    1.06 
   2 -28   2    2.54    0.85 
  -2  28   2    3.00    1.03 
   2 -28  -4    0.46    0.87 
  -2 -28   4    0.57    0.65 
   2  28   4    0.22    0.92 
  -2  28  -4    1.42    1.19 
  -2 -28   4    1.98    0.91 
  -2 -28  -4   -0.35    0.85 
   2  28  -4   -0.23    1.10 
   2 -28   4   -1.10    0.70 
   2 -28   4    0.22    0.66 
  -2  28   4    0.48    0.95 
  -2 -28   6    0.92    0.88 
  -2  28  -6    0.49    1.42 
  -2 -28   6   -0.14    0.94 
   2 -28  -6    2.72    1.13 
   2  28   6    1.12    1.20 
  -2  28   6   -0.49    1.06 
   2  28  -6    0.99    1.39 
   2 -28   6   -0.48    0.73 
   2 -28   6    1.26    1.06 
  -2 -28  -6    0.73    1.11 
  -2 -29   1    3.85    1.02 
   2 -29  -1    2.85    1.04 
  -2  29  -1    3.51    1.18 
   2 -29  -1    2.40    0.75 
   2  29   1    2.32    0.91 
  -2 -29   1    4.66    0.92 
  -2 -29  -1    3.99    0.78 
   2 -29   1    2.09    0.85 
   2  29  -1    3.68    1.22 
   2 -29   1    3.80    0.65 
  -2  29   1    2.61    0.94 
   2 -29   1    2.32    0.89 
  -2 -29  -1    4.45    1.10 
  -2 -29   3    1.03    0.61 
   2  29   3    0.95    0.91 
  -2  29  -3    1.88    1.25 
  -2 -29   3    0.67    0.68 
  -2 -29   3    0.43    0.79 
   2 -29  -3    0.33    0.86 
   2 -29   3    0.27    0.83 
   2 -29   3    1.39    0.70 
  -2 -29  -3    1.58    0.99 
   2  29  -3   -0.43    1.06 
   2 -29   3    0.67    0.67 
  -2  29   3    1.36    0.95 
   2 -29  -5    6.17    1.34 
  -2 -29   5    7.74    1.27 
   2  29   5    8.92    1.66 
  -2 -29   5    7.72    1.45 
  -2  29  -5    6.62    1.67 
   2 -29   5    7.80    1.59 
   2 -29   5    8.55    1.32 
  -2 -29  -5    7.50    1.46 
   2  29  -5    5.79    1.69 
  -2  29   5    9.54    1.64 
  -2  30   0    0.20    0.86 
   2  30   0   -0.05    0.85 
  -2 -30   0   -0.04    0.62 
   2 -30   0    0.16    0.68 
  -2 -30   0    0.14    0.83 
   2 -30   0    0.26    0.79 
  -2 -30   2    3.15    0.92 
   2 -30  -2    2.76    0.80 
  -2  30  -2    1.97    1.18 
  -2 -30   2    2.33    0.63 
   2  30   2    2.85    1.01 
   2 -30  -2    3.36    1.06 
  -2 -30   2    3.14    0.89 
  -2  30   2    1.55    0.98 
   2 -30   2    4.26    0.91 
   2 -30   2    2.92    0.72 
   2  30  -2    1.19    1.19 
  -2 -30  -2    4.94    1.23 
   2 -30   2    2.15    0.94 
  -2 -30   4    5.48    1.05 
   2  30   4    4.84    1.32 
  -2  30  -4    5.21    1.57 
   2 -30  -4    3.85    1.19 
  -2 -30   4    4.13    1.21 
   2  30  -4    5.11    1.59 
   2 -30   4    6.67    1.14 
  -2  30   4    4.23    1.21 
  -2 -30  -4    4.68    1.30 
   2 -30   4    3.33    1.12 
   2  30   6    0.75    1.11 
  -2 -30   6    1.52    0.91 
  -2  30  -6    4.01    1.63 
   2 -30  -6    0.25    0.94 
  -2 -30   6   -0.94    0.95 
   2 -30   6    0.49    0.90 
  -2  30   6    1.62    1.30 
  -2 -30  -6    0.79    1.20 
   2 -30   6    2.25    1.21 
   2  30  -6    1.25    1.55 
   2 -31  -1    1.65    0.74 
   2  31   1    0.72    0.85 
  -2 -31   1    0.95    0.73 
   2 -31  -1    2.28    0.99 
  -2 -31   1    2.67    0.97 
  -2  31  -1    1.16    1.06 
   2  31  -1   -0.44    0.97 
  -2  31   1    0.90    0.94 
  -2 -31  -1    0.55    0.90 
   2 -31   1    2.06    0.93 
  -2 -31  -1    0.55    0.61 
   2 -31   1    0.53    0.77 
  -2 -31   3    1.06    0.86 
  -2 -31   3    0.15    0.77 
  -2 -31   3    1.02    0.62 
   2 -31  -3    1.03    0.95 
  -2  31  -3    0.24    1.17 
   2  31   3    1.28    0.98 
   2 -31   3    1.39    0.94 
   2 -31   3    0.65    0.66 
   2  31  -3    1.37    1.27 
   2 -31   3    1.97    0.90 
  -2 -31  -3    2.48    1.09 
  -2  31   3   -0.43    0.89 
  -2  31  -5    1.41    1.50 
   2  31   5    1.09    1.16 
   2 -31  -5    3.43    1.32 
  -2 -31   5    2.24    1.11 
  -2 -31   5    2.62    0.93 
  -2 -31  -5    1.97    1.19 
   2 -31   5    1.75    1.11 
  -2  31   5    1.82    1.31 
   2 -31   5    1.90    0.90 
   2  31  -5    2.02    1.48 
   2  32   0    7.40    1.57 
   2 -32   0    7.78    1.17 
  -2 -32   0   10.61    1.48 
   2 -32   0    7.80    1.33 
  -2  32   0    7.31    1.48 
  -2 -32   0    6.92    1.05 
  -2  32  -2   -0.54    1.06 
  -2 -32   2    0.75    0.80 
  -2 -32   2   -0.59    0.71 
   2 -32  -2   -0.59    0.86 
   2  32   2   -0.09    0.84 
   2 -32   2    1.01    0.79 
  -2 -32  -2   -0.31    0.93 
   2  32  -2    0.12    1.04 
   2 -32   2    0.13    0.79 
  -2  32   2   -0.10    0.95 
  -2 -32   4    2.32    1.04 
   2  32   4    1.91    1.18 
   2 -32  -4    4.04    1.31 
  -2 -32   4    2.66    0.83 
  -2  32  -4    2.27    1.52 
   2 -32   4    3.93    1.19 
   2  32  -4    1.78    1.50 
  -2  32   4    4.03    1.36 
  -2 -32  -4    1.21    1.15 
   2 -32   4    2.58    0.88 
   2  32   6    3.18    1.48 
  -2  32  -6    0.53    1.61 
   2 -32  -6    0.25    1.10 
  -2 -32   6    1.64    1.20 
  -2 -32   6    2.69    1.05 
   2  32  -6    1.86    1.66 
  -2  32   6    2.54    1.55 
   2 -32   6   -0.31    1.10 
  -2 -32  -6    2.09    1.28 
   2 -32   6    3.00    1.06 
  -2 -33   1    0.63    0.76 
   2  33   1    1.19    0.97 
  -2 -33   1    2.22    0.98 
  -2  33  -1    1.36    1.25 
   2 -33  -1    0.56    0.72 
   2 -33  -1    2.73    1.08 
   2 -33   1    1.53    0.94 
   2  33  -1   -0.06    1.14 
  -2 -33  -1    0.22    0.95 
  -2  33   1    0.87    1.06 
   2 -33   1    1.02    0.82 
  -2 -33  -1    1.38    1.07 
  -2  33  -3   11.32    2.03 
   2 -33  -3   13.12    1.79 
   2  33   3   10.41    1.67 
  -2 -33   3   10.19    1.50 
  -2  33   3   13.68    1.88 
   2 -33   3   11.48    1.29 
  -2 -33  -3   12.19    1.78 
   2  33  -3   11.35    2.00 
   2 -33   3   10.94    1.60 
  -2 -33   5    7.73    1.67 
   2 -33  -5    9.09    1.64 
   2  33   5    7.24    1.73 
  -2 -33   5    8.21    1.34 
  -2  33  -5    6.54    1.94 
  -2  33   5   10.21    1.92 
   2 -33   5    8.59    1.34 
   2  33  -5    5.70    1.93 
   2 -33   5    6.61    1.56 
  -2 -33  -5   10.01    1.72 
  -2 -34   0    0.38    0.99 
   2 -34   0   -0.01    0.74 
  -2 -34   0    0.20    0.68 
   2  34   0    0.02    1.04 
  -2  34   0    0.08    1.11 
   2 -34   0   -0.19    0.89 
  -2 -34   2    1.30    0.91 
  -2 -34   2    0.62    0.78 
   2  34   2    2.28    1.21 
   2 -34  -2    2.55    1.23 
  -2  34  -2    1.66    1.37 
   2 -34   2    1.55    0.90 
   2  34  -2    0.78    1.41 
   2 -34   2    2.85    1.02 
  -2  34   2    2.14    1.21 
  -2 -34  -2    1.94    1.20 
   2 -34  -4    2.86    1.26 
  -2  34  -4    0.67    1.55 
   2  34   4    2.05    1.20 
  -2 -34   4    2.97    1.14 
  -2 -34   4   -0.05    0.84 
   2 -34   4    1.42    1.08 
   2 -34   4    1.84    0.83 
   2  34  -4    0.26    1.38 
  -2 -34  -4    1.57    1.20 
  -2  34   4    0.96    1.24 
  -2 -35   1    2.68    1.13 
  -2  35  -1    2.52    1.36 
   2 -35  -1    0.71    0.80 
  -2 -35   1    2.96    0.94 
   2  35   1    3.30    1.30 
   2 -35  -1    1.10    1.14 
  -2 -35  -1    2.26    1.21 
   2  35  -1    3.40    1.44 
   2 -35   1    3.05    1.09 
   2 -35   1    1.57    0.87 
  -2  35   1    3.97    1.36 
  -2 -35   3   -0.02    0.81 
   2 -35  -3    0.08    1.04 
  -2  35  -3   -1.48    1.49 
   2  35   3   -0.41    1.04 
  -2 -35  -3   -1.05    1.02 
   2  35  -3   -1.59    1.33 
   2 -35   3   -0.78    0.79 
  -2  35   3   -0.04    1.11 
  -2 -36   0   12.96    1.46 
   2 -36   0   14.17    1.81 
  -2  36   0   12.19    1.99 
   2  36   0   12.05    1.95 
  -2 -36   0   11.36    1.72 
   2 -36   0   13.69    1.57 
  -2  36  -2   -0.77    1.38 
  -2 -36   2   -0.31    0.76 
   2 -36  -2    1.12    1.18 
  -2 -36   2    1.08    0.99 
   2  36   2    0.70    1.15 
   2 -36   2   -0.17    0.86 
  -2  36   2    0.95    1.12 
  -2 -36  -2   -0.67    1.03 
   2  36  -2    1.37    1.40 
   2 -36   2   -0.09    0.86 
  -2 -36   4    0.10    0.85 
  -2  36  -4    0.67    1.63 
   2 -36  -4    2.29    1.30 
   2  36   4    0.38    1.27 
   2  36  -4    0.21    1.44 
  -2  36   4   -0.68    1.22 
   2 -36   4    0.24    1.00 
  -2 -36  -4    0.02    1.20 
  -2 -37   1   -0.32    0.74 
   2  37   1    0.19    1.10 
  -2 -37   1    0.68    1.01 
  -2  37  -1    2.31    1.41 
   2 -37  -1    1.10    1.05 
   2  37  -1   -0.97    1.19 
  -2  37   1    0.87    1.21 
   2 -37   1    0.61    1.01 
  -2 -37  -1    1.05    1.14 
   2 -37   1    0.22    0.80 
   2  37   3    4.04    1.47 
  -2 -37   3    3.25    1.10 
   2 -37  -3    4.37    1.39 
  -2  37  -3    1.94    1.72 
  -2 -37  -3    1.00    1.32 
   2  37  -3    2.21    1.59 
   2 -37   3    2.58    1.12 
  -2  37   3    2.06    1.31 
  -2 -38   0    0.06    1.08 
  -2  38   0   -0.87    1.20 
   2  38   0    0.73    1.16 
   2 -38   0    0.61    1.09 
   2 -38   0    0.37    0.80 
   2 -38  -2    1.98    1.18 
  -2  38  -2   -0.02    1.53 
  -2 -38   2   -0.18    1.07 
  -2 -38   2    1.38    1.00 
   2  38   2    1.14    1.23 
  -2  38   2    0.66    1.34 
   2 -38   2   -0.20    0.82 
   2  38  -2    0.35    1.46 
   2 -38   2    1.45    1.14 
  -2 -38  -2    2.14    1.25 
   2  39   1    1.69    1.42 
  -2 -39   1    0.77    0.86 
   2 -39  -1    1.96    1.29 
  -2  39  -1    1.36    1.47 
  -2 -39   1    1.91    1.23 
  -2 -39  -1    2.42    1.32 
   2 -39   1    0.90    1.09 
   2  39  -1    0.76    1.42 
  -2  39   1    1.11    1.31 
   2 -39   1    0.09    0.82 
  -2  40   0   -0.81    1.26 
   2 -40   0   -1.65    1.02 
   2  40   0    1.09    1.38 
  -2 -40   0    0.09    1.19 
  -3   0   0   -0.37    0.16 
   3   0   0   -0.37    0.12 
  -3   0   0   -0.16    0.22 
  -3   0  -2   -0.08    0.32 
  -3   0   2   -0.21    0.36 
   3   0   2   -0.32    0.34 
   3   0   2   -0.45    0.48 
  -3   0   2   -0.39    0.29 
  -3   0   2    0.07    0.48 
   3   0   2   -0.77    0.29 
  -3   0   2    0.16    0.38 
  -3   0   4    0.16    0.48 
   3   0   4    0.17    0.60 
  -3   0   4    0.24    0.45 
   3   0   4    0.09    0.43 
  -3   0  -4    0.03    0.36 
   3   0   4    0.27    0.39 
   3   0  -6    0.47    0.87 
  -3   0  -6   -0.44    0.39 
  -3   0   6    0.58    0.62 
   3   0   6   -0.41    0.57 
  -3   0  -6   -0.65    0.73 
   3   0  -6    0.29    0.38 
   3   0   6    0.27    0.53 
  -3   0   6    0.11    0.54 
  -3   0   8    0.24    0.72 
  -3   0  -8    0.41    1.00 
   3   0  -8    2.02    1.13 
   3   0   8   -0.01    0.73 
   3   0   8    0.34    0.65 
  -3   0   8    0.71    0.76 
  -3   0 -10    6.31    1.51 
  -3   0  10    1.80    0.98 
   3   0  10    0.62    1.00 
   3   0 -10    4.70    1.36 
  -3   1  -1  266.24    5.97 
  -3  -1   1  291.37    5.99 
   3   1   1  292.16    6.10 
  -3  -1   1  292.35    6.03 
  -3  -1   1  292.35    6.07 
   3   1   1  297.19    5.98 
  -3   1   1  288.03    6.05 
  -3   1   1  288.72    6.00 
   3  -1   1  296.79    6.10 
   3   1  -1  289.96    6.04 
   3  -1   1  292.87    6.03 
  -3   1   1  287.30    6.04 
  -3   1   1  290.88    6.03 
  -3  -1  -1  293.52    6.03 
  -3  -1   3   49.42    1.35 
   3   1   3   52.44    1.93 
  -3   1  -3   49.70    1.38 
   3   1   3   54.53    1.66 
  -3  -1   3   50.20    1.67 
   3   1   3   53.12    1.49 
  -3  -1   3   50.36    1.65 
  -3   1   3   52.14    1.65 
  -3   1   3   53.00    1.46 
  -3   1   3   49.84    1.61 
   3  -1   3   52.19    1.70 
   3   1  -3   51.42    1.90 
   3  -1   3   52.41    1.58 
   3  -1   3   50.71    1.92 
  -3  -1  -3   51.25    1.47 
  -3   1   3   51.43    1.87 
  -3   1  -5   20.16    0.90 
   3   1   5   20.22    1.55 
   3   1   5   21.86    1.14 
   3  -1  -5   20.69    0.97 
  -3   1  -5   19.26    1.56 
  -3  -1   5   19.55    1.25 
   3   1   5   20.62    1.28 
  -3  -1   5   22.75    1.34 
   3  -1   5   22.87    1.35 
  -3   1   5   21.60    1.22 
  -3   1   5   19.92    1.28 
  -3  -1  -5   21.07    1.00 
   3   1  -5   17.61    1.51 
   3   1  -5   20.51    0.86 
   3  -1   5   22.60    1.20 
  -3  -1   7    2.57    0.80 
   3   1   7    1.21    0.74 
   3  -1  -7    3.13    1.10 
  -3  -1   7    1.68    0.75 
   3   1   7    1.74    0.67 
  -3   1  -7    0.79    0.91 
   3  -1   7    1.00    0.76 
  -3  -1  -7    0.90    0.96 
  -3   1   7    3.20    0.85 
   3  -1   7    2.22    0.71 
  -3   1   7    1.27    0.70 
   3   1  -7    2.56    1.07 
  -3  -1   9    4.04    1.08 
  -3   1  -9    4.54    1.47 
   3  -1  -9    8.73    1.72 
   3   1   9    3.36    1.11 
  -3  -1   9    5.05    1.15 
  -3  -1  -9    7.55    1.72 
   3  -1   9    3.90    1.19 
  -3   1   9    3.09    1.04 
   3   1  -9    5.92    1.47 
  -3   1   9    4.38    1.04 
  -3   2   0   13.39    0.55 
   3   2   0   13.17    0.45 
  -3  -2   0   13.03    0.48 
   3  -2   0   13.02    0.46 
  -3  -2   0   12.61    0.54 
   3   2   2  198.92    4.35 
  -3  -2   2  200.34    4.20 
  -3   2  -2  202.04    4.19 
  -3  -2   2  195.26    4.46 
   3   2   2  197.17    4.60 
   3   2   2  201.96    4.20 
  -3  -2   2  201.05    4.46 
  -3   2  -2  205.44    4.62 
   3   2  -2  199.88    4.55 
  -3   2   2  192.69    4.37 
  -3  -2  -2  205.11    4.36 
  -3   2   2  196.24    4.55 
  -3   2   2  194.77    4.35 
   3  -2   2  200.91    4.46 
  -3   2   2  190.21    4.32 
   3  -2   2  200.61    4.37 
   3  -2  -4   10.74    0.76 
  -3  -2   4    8.93    0.87 
   3   2   4   11.28    0.77 
   3   2   4   12.21    0.92 
   3   2   4   13.06    1.21 
  -3  -2   4   11.54    1.00 
  -3   2  -4    9.48    0.61 
  -3   2  -4   10.74    1.18 
   3   2  -4   11.43    1.21 
   3  -2   4    9.54    0.92 
  -3  -2  -4    9.17    0.75 
   3  -2   4   11.93    0.89 
  -3   2   4   10.86    1.16 
  -3   2   4   11.80    0.93 
  -3   2   4   11.36    0.86 
  -3  -2   6    6.44    0.95 
   3   2   6    6.46    0.97 
   3  -2  -6    3.94    1.09 
  -3   2  -6    6.70    1.22 
   3   2   6    5.39    1.17 
   3   2   6    4.87    0.74 
  -3  -2   6    5.23    0.91 
  -3   2  -6    6.77    0.61 
   3  -2  -6    4.77    0.65 
   3   2  -6    6.02    0.56 
   3   2  -6    5.66    1.13 
  -3  -2  -6    6.86    0.75 
  -3   2   6    5.65    0.91 
   3  -2   6    4.72    0.91 
   3  -2   6    7.50    0.96 
  -3   2   6    5.33    0.83 
  -3  -2   8    7.41    1.21 
  -3  -2   8    6.98    1.25 
  -3   2  -8    7.38    1.62 
   3  -2  -8   11.28    1.74 
   3   2   8    8.65    1.07 
   3   2   8    7.26    1.24 
  -3   2   8    7.57    1.15 
  -3  -2  -8    6.65    1.43 
   3  -2   8    6.21    1.23 
   3  -2   8    8.18    1.19 
  -3   2   8    6.13    1.15 
   3   2  -8    6.96    1.43 
  -3   2 -10    4.55    1.41 
  -3  -2  10    2.08    1.08 
   3  -2 -10    7.39    1.63 
   3   2  10    1.76    1.01 
   3  -2  10    3.18    1.20 
  -3  -2 -10    5.21    1.50 
  -3   2  10    2.87    1.12 
   3   2 -10    2.88    1.41 
  -3  -3   1  730.57   14.90 
  -3   3  -1  669.07   14.75 
   3   3   1  732.84   14.88 
   3   3   1  725.29   14.71 
  -3  -3   1  707.20   14.77 
  -3   3  -1  748.25   14.87 
  -3  -3   1  738.89   14.85 
  -3   3   1  747.70   14.84 
  -3   3   1  729.50   14.88 
  -3   3   1  752.22   14.84 
  -3  -3  -1  754.03   14.90 
  -3   3   1  733.58   14.75 
   3  -3   1  748.16   14.87 
   3   3  -1  731.85   14.83 
  -3  -3   3   99.91    2.74 
  -3   3  -3  101.03    2.28 
   3   3   3  100.36    2.39 
  -3  -3   3  101.49    2.74 
   3   3   3  102.56    2.59 
  -3  -3   3   99.96    2.26 
   3   3   3  101.82    2.94 
  -3   3  -3  101.76    2.91 
   3   3  -3   97.68    2.87 
  -3   3   3  104.34    2.55 
  -3   3   3  100.83    2.57 
   3  -3   3  101.79    2.75 
  -3  -3  -3  103.58    2.58 
   3  -3   3  104.97    2.66 
  -3   3   3  100.43    2.88 
  -3   3   3  104.55    2.60 
   3   3   5    1.24    0.56 
   3   3   5    3.13    0.88 
   3   3   5    1.95    0.50 
  -3   3  -5    1.28    0.32 
   3  -3  -5    1.12    0.49 
  -3  -3   5    1.07    0.56 
  -3  -3   5    2.19    0.68 
  -3   3  -5    1.92    0.85 
  -3   3   5    1.81    0.60 
   3  -3   5    1.81    0.58 
  -3   3   5    1.69    0.53 
  -3  -3  -5    0.88    0.52 
   3   3  -5    2.07    0.90 
   3  -3   5    1.02    0.60 
  -3   3   5    2.40    0.85 
   3   3  -5    1.86    0.33 
  -3   3  -7    1.07    1.04 
  -3  -3   7    1.16    0.75 
   3   3   7    1.54    0.63 
  -3  -3   7   -0.30    0.63 
   3  -3  -7    1.07    0.96 
   3   3   7    0.39    0.70 
   3  -3   7    1.40    0.80 
   3  -3   7    1.80    0.74 
  -3   3   7    1.09    0.69 
  -3   3   7    0.90    0.63 
   3   3  -7    1.72    1.04 
  -3   3  -9    3.70    1.32 
  -3  -3   9   -0.32    0.81 
   3  -3  -9    5.20    1.43 
  -3  -3   9    1.53    0.91 
   3   3   9    1.69    0.89 
   3  -3   9    1.39    1.03 
  -3   3   9    0.26    0.82 
   3   3  -9    1.23    1.18 
   3  -3   9    1.21    0.83 
  -3  -3  -9    3.21    1.34 
  -3   4   0   80.61    1.83 
  -3  -4   0   80.58    1.85 
  -3  -4   0   83.32    1.96 
  -3   4   0   82.89    1.94 
   3   4   0   84.40    1.91 
   3  -4   0   82.70    1.84 
  -3  -4   0   77.58    1.77 
   3   4   2   40.95    1.21 
   3   4   2   43.05    1.51 
  -3   4  -2   46.08    1.09 
  -3  -4   2   42.49    1.40 
  -3  -4   2   40.91    1.08 
  -3  -4   2   42.82    1.44 
  -3   4  -2   44.73    1.50 
  -3   4   2   42.34    1.27 
   3  -4   2   42.41    1.36 
  -3   4   2   40.53    1.33 
  -3   4   2   39.73    1.21 
   3   4  -2   41.49    1.45 
  -3   4   2   42.55    1.47 
  -3  -4  -2   42.21    1.37 
   3  -4   2   40.38    1.40 
   3   4   4    4.45    0.64 
  -3  -4   4    3.29    0.66 
   3   4   4    3.19    0.79 
   3   4   4    3.92    0.48 
   3  -4  -4    1.79    0.50 
  -3   4  -4    2.66    0.81 
  -3  -4   4    3.96    0.70 
  -3   4   4    4.06    0.62 
  -3   4   4    3.67    0.58 
  -3   4   4    2.18    0.73 
  -3  -4  -4    3.43    0.61 
   3   4  -4    2.91    0.79 
   3  -4   4    2.11    0.62 
   3  -4   4    4.33    0.67 
   3  -4  -6    6.34    0.75 
  -3   4  -6    5.02    1.12 
   3   4   6    4.33    0.67 
  -3  -4   6    5.33    0.95 
  -3  -4   6    3.73    0.84 
   3   4   6    4.76    1.05 
   3   4   6    3.34    0.79 
  -3  -4  -6    4.94    0.78 
   3   4  -6    3.85    1.07 
  -3   4   6    4.34    0.80 
   3  -4   6    5.23    0.95 
  -3   4   6    2.97    0.95 
  -3   4   6    4.65    0.76 
   3  -4   6    4.85    0.85 
   3   4   8    0.70    0.76 
   3  -4  -8    1.84    1.09 
  -3  -4   8   -0.36    0.75 
  -3   4  -8    0.69    1.08 
  -3  -4   8    0.13    0.73 
  -3   4   8    0.98    0.72 
   3   4  -8    1.64    1.05 
  -3  -4  -8    1.93    1.20 
   3  -4   8    0.50    0.87 
  -3   4   8    1.05    0.76 
   3  -4   8    0.08    0.76 
   3   4  10    0.90    0.86 
  -3  -4  10    0.57    0.95 
  -3  -4  10    0.42    0.90 
  -3   4  10    1.22    0.96 
   3  -4  10    1.13    1.08 
  -3   5  -1  127.89    2.86 
  -3  -5   1  128.83    2.94 
  -3  -5   1  120.32    2.87 
  -3   5  -1  133.51    2.97 
   3   5   1  130.99    2.97 
   3  -5  -1  127.05    2.81 
   3   5   1  127.69    2.71 
  -3  -5   1  129.04    3.02 
  -3  -5  -1  131.17    3.04 
   3   5  -1  128.94    2.95 
  -3   5   1  131.87    2.92 
  -3   5   1  127.66    3.02 
   3  -5   1  145.11    3.03 
  -3   5  -3  117.59    3.18 
  -3  -5   3  109.78    3.02 
   3   5   3  117.09    2.81 
  -3  -5   3  118.22    3.09 
   3   5   3  118.02    2.58 
  -3  -5   3  114.79    2.47 
   3   5   3  112.34    3.22 
  -3   5   3  114.86    2.81 
   3  -5   3  115.64    2.99 
   3  -5   3  113.33    3.05 
  -3   5   3  116.82    2.92 
  -3   5   3  115.01    3.18 
  -3  -5  -3  114.90    2.93 
  -3   5   3  116.94    2.81 
   3   5  -3  112.11    3.13 
   3   5   5    5.59    1.00 
  -3  -5   5    5.53    0.87 
   3   5   5    6.04    0.61 
   3   5   5    6.75    0.81 
  -3   5  -5    5.64    1.03 
  -3  -5   5    6.45    0.95 
   3  -5  -5    7.12    0.80 
  -3   5   5    4.98    0.68 
  -3  -5  -5    4.94    0.75 
   3  -5   5    5.82    0.90 
  -3   5   5    4.38    0.69 
  -3   5   5    4.18    0.93 
   3  -5   5    5.29    0.80 
   3   5  -5    4.76    0.96 
   3   5   7    6.54    1.04 
   3   5   7    6.13    1.29 
   3   5   7    7.16    0.86 
  -3  -5   7    6.88    1.10 
  -3  -5   7    6.97    1.17 
  -3   5  -7    6.25    1.37 
   3  -5  -7    6.56    0.85 
   3   5  -7    7.21    1.38 
  -3   5   7    6.79    1.01 
   3  -5   7    6.41    1.11 
   3  -5   7    5.96    1.14 
  -3   5   7    5.73    0.88 
  -3  -5  -7    7.40    0.94 
  -3   5   7    4.61    1.24 
  -3  -5   9    2.51    1.11 
  -3   5  -9    2.36    1.30 
   3   5   9    1.27    0.82 
   3  -5  -9    7.28    1.58 
  -3  -5   9    1.50    0.95 
   3   5  -9    4.54    1.47 
   3  -5   9    3.22    1.17 
   3  -5   9    2.44    0.98 
  -3   5   9    1.59    0.95 
  -3  -5  -9    6.07    1.62 
  -3   6   0   71.33    1.78 
  -3  -6   0   69.56    1.64 
   3   6   0   76.41    1.88 
  -3  -6   0   71.34    1.88 
  -3   6   0   75.96    1.87 
   3  -6   0   73.41    1.72 
  -3  -6   0   73.18    1.76 
  -3  -6   2    1.24    0.50 
  -3  -6   2    2.29    0.32 
  -3  -6   2    2.14    0.50 
   3   6   2    2.64    0.55 
  -3   6  -2    1.37    0.29 
  -3   6  -2    1.50    0.59 
  -3   6   2    1.16    0.48 
   3   6  -2    2.04    0.58 
  -3   6   2    1.67    0.34 
  -3  -6  -2    1.81    0.53 
   3  -6   2    2.01    0.49 
  -3   6   2    1.56    0.37 
   3  -6   2    1.80    0.48 
  -3   6   2    2.08    0.53 
  -3  -6   4   12.23    1.13 
   3   6   4   16.08    1.32 
  -3  -6   4   13.69    1.09 
   3   6   4   14.10    0.91 
  -3   6  -4   14.06    1.29 
   3   6   4   14.31    0.71 
   3  -6  -4   14.03    1.00 
  -3   6   4   15.90    0.91 
  -3   6   4   14.74    0.90 
   3  -6   4   14.67    1.12 
  -3  -6  -4   14.37    1.02 
   3  -6   4   12.53    1.07 
  -3   6   4   13.03    1.23 
   3   6  -4   15.04    1.31 
   3   6   6    0.73    0.81 
   3  -6  -6    0.87    0.55 
  -3   6  -6    0.58    0.90 
   3   6   6    0.79    0.46 
   3   6   6    0.53    0.58 
  -3  -6   6    0.46    0.68 
  -3  -6   6    0.08    0.66 
  -3   6   6   -0.52    0.76 
   3  -6   6    0.29    0.63 
   3  -6   6    0.82    0.64 
  -3   6   6    0.52    0.57 
  -3  -6  -6   -0.08    0.56 
   3   6  -6   -0.14    0.86 
  -3   6   6   -0.32    0.46 
   3   6   8    3.44    1.28 
  -3  -6   8    4.40    1.12 
  -3   6  -8    2.40    1.21 
   3   6   8    2.91    0.90 
  -3  -6   8    1.08    0.91 
   3  -6  -8    5.38    1.48 
   3   6  -8    4.03    1.41 
  -3   6   8    3.04    0.92 
   3  -6   8    3.31    0.99 
  -3   6   8    3.09    0.82 
   3  -6   8    3.14    1.03 
  -3  -7   1   15.49    0.75 
  -3  -7   1   17.18    0.91 
   3  -7  -1   16.28    0.61 
   3   7   1   16.98    0.81 
  -3  -7   1   17.82    0.80 
  -3   7  -1   17.61    0.77 
  -3   7  -1   18.13    0.84 
  -3   7   1   17.74    0.77 
  -3  -7  -1   15.90    0.91 
   3  -7   1   17.17    0.84 
   3   7  -1   15.90    0.88 
   3   7   3    0.78    0.53 
   3   7   3    0.17    0.33 
  -3  -7   3    0.78    0.49 
  -3  -7   3    0.11    0.49 
  -3   7  -3   -0.07    0.62 
  -3  -7   3    0.82    0.21 
  -3   7   3    0.49    0.35 
  -3  -7  -3    0.60    0.52 
  -3   7   3    0.88    0.49 
   3  -7   3    0.59    0.50 
   3  -7   3    0.37    0.48 
   3   7  -3    0.58    0.62 
  -3   7   3    0.75    0.38 
  -3   7   3    0.51    0.54 
   3  -7  -5   15.00    1.08 
  -3  -7   5   16.51    1.31 
   3   7   5   14.02    1.44 
  -3  -7   5   17.55    1.33 
   3   7   5   16.03    0.82 
   3   7   5   14.55    1.02 
  -3   7  -5   13.51    1.47 
   3   7  -5   16.11    1.49 
  -3   7   5   16.05    0.99 
  -3  -7  -5   14.15    1.11 
   3  -7   5   18.46    1.32 
   3  -7   5   13.91    1.21 
  -3   7   5   14.66    1.02 
  -3   7   5   14.13    1.40 
  -3  -7   7    2.02    0.85 
   3   7   7    1.99    0.74 
  -3  -7   7    2.89    0.97 
  -3   7  -7    1.85    1.07 
   3  -7  -7    4.72    0.83 
   3   7   7    4.74    1.27 
  -3   7   7    5.44    1.35 
  -3   7   7    3.95    0.85 
   3  -7   7    3.09    0.98 
   3  -7   7    4.15    1.01 
   3   7  -7    3.72    1.15 
  -3   7   7    4.10    0.79 
  -3  -7  -7    3.70    0.84 
  -3   7  -9    3.23    1.34 
  -3  -7   9    2.13    1.08 
  -3  -7   9    1.79    1.04 
   3   7   9    3.86    1.03 
   3  -7  -9    6.38    1.53 
   3  -7   9   -0.02    0.87 
  -3  -7  -9    2.52    1.31 
   3  -7   9    2.04    1.09 
   3   7  -9    4.29    1.46 
  -3   7   9    2.00    0.94 
  -3  -8   0    2.06    0.38 
  -3   8   0    2.42    0.48 
   3   8   0    2.85    0.51 
  -3   8   0    1.70    0.41 
  -3  -8   0    1.75    0.46 
   3  -8   0    1.91    0.34 
  -3  -8   0    2.03    0.29 
  -3   8  -2   21.96    0.79 
  -3  -8   2   21.24    1.14 
   3   8   2   22.34    1.13 
  -3  -8   2   22.08    1.07 
  -3  -8   2   21.77    0.81 
   3   8   2   21.52    0.69 
  -3   8  -2   23.05    1.13 
  -3  -8  -2   22.01    1.13 
  -3   8   2   23.31    1.14 
  -3   8   2   21.87    0.76 
   3  -8   2   22.27    1.11 
   3   8  -2   21.61    1.13 
  -3   8   2   23.00    1.11 
   3  -8   2   24.12    1.16 
   3   8   4    1.68    0.46 
  -3  -8   4    1.68    0.64 
   3   8   4    1.96    0.73 
  -3  -8   4    1.96    0.63 
   3   8   4    1.88    0.32 
  -3   8  -4    1.56    0.77 
   3  -8  -4    1.07    0.55 
   3  -8   4    3.04    0.69 
  -3   8   4    1.41    0.45 
   3   8  -4    1.64    0.75 
   3  -8   4    0.68    0.56 
  -3  -8  -4    2.06    0.62 
  -3   8   4    1.75    0.45 
  -3   8   4    2.40    0.74 
   3  -8  -6    2.72    0.71 
  -3   8  -6    1.95    0.99 
   3   8   6    3.25    0.72 
   3   8   6    3.42    1.09 
   3   8   6    3.67    0.56 
  -3  -8   6    2.01    0.80 
  -3  -8   6    2.22    0.81 
  -3   8   6    3.25    0.66 
  -3   8   6    2.97    0.68 
   3  -8   6    2.07    0.76 
  -3  -8  -6    2.66    0.74 
  -3   8   6    1.46    0.88 
   3  -8   6    2.22    0.82 
   3   8  -6    1.91    0.97 
  -3  -8   8    3.13    1.06 
  -3  -8   8    2.15    1.00 
   3   8   8    0.78    0.76 
   3   8   8    1.80    1.14 
  -3   8  -8    4.56    1.49 
   3  -8   8    0.62    0.97 
   3   8  -8    2.29    1.16 
  -3   8   8    1.34    1.21 
  -3   8   8    2.53    0.86 
   3  -8   8    1.33    0.96 
  -3  -9   1   10.91    0.82 
  -3  -9   1   10.24    0.71 
  -3  -9   1    9.41    0.69 
   3   9   1   11.74    0.76 
   3  -9  -1   10.43    0.54 
  -3   9  -1   11.98    0.77 
  -3   9  -1   10.95    0.79 
  -3  -9  -1   11.38    0.54 
   3  -9   1   11.36    0.77 
  -3   9   1   10.64    0.88 
  -3   9   1   12.54    0.74 
  -3  -9  -1   11.06    0.87 
   3   9  -1   12.38    0.85 
  -3   9  -3   10.76    1.07 
  -3  -9   3    9.90    0.49 
   3   9   3   10.45    1.02 
  -3  -9   3   10.29    0.99 
  -3  -9   3    9.08    0.92 
   3   9   3   10.10    0.60 
  -3  -9  -3   10.59    1.01 
  -3   9   3   10.09    0.64 
  -3   9   3    9.61    1.00 
   3  -9   3    9.93    0.92 
   3   9  -3    8.10    0.90 
   3  -9   3   10.44    1.01 
  -3   9   3    9.86    0.72 
  -3   9  -5   52.97    2.33 
  -3  -9   5   51.64    2.16 
   3  -9  -5   48.05    1.95 
   3   9   5   50.49    2.38 
   3   9   5   55.08    1.49 
  -3  -9   5   56.57    2.29 
   3   9   5   52.46    1.79 
  -3  -9  -5   54.72    2.05 
  -3   9   5   48.23    2.32 
  -3   9   5   55.00    1.81 
   3  -9   5   48.98    2.14 
   3  -9   5   51.27    2.19 
   3   9  -5   51.20    2.30 
  -3   9   5   51.29    1.75 
  -3  -9   7    4.32    1.06 
  -3   9  -7    7.04    1.46 
   3  -9  -7    4.29    0.86 
  -3  -9   7    6.55    1.21 
   3   9   7    5.69    0.90 
   3   9   7    4.84    1.23 
  -3   9   7    5.63    0.84 
   3  -9   7    4.40    1.11 
  -3   9   7    5.03    0.89 
   3  -9   7    5.67    1.10 
   3   9  -7    5.25    1.30 
  -3  -9  -7    4.93    0.98 
  -3   9   7    6.38    1.49 
   3   9   9    6.91    1.17 
  -3   9  -9    5.90    1.49 
  -3  -9   9    4.81    1.30 
   3  -9  -9    9.97    2.03 
  -3  -9   9    3.71    1.20 
   3  -9   9    6.10    1.35 
  -3   9   9    4.76    1.05 
   3   9  -9    6.49    1.52 
   3  -9   9    7.06    1.46 
  -3 -10   0   52.11    1.50 
   3  10   0   49.93    1.62 
  -3 -10   0   52.46    1.29 
   3 -10   0   53.13    1.41 
  -3  10   0   53.11    1.67 
  -3  10   0   52.11    1.58 
  -3 -10   0   48.77    1.60 
  -3  10  -2    0.52    0.54 
   3  10   2    1.22    0.50 
  -3 -10   2    0.71    0.46 
   3 -10  -2    0.89    0.30 
  -3 -10   2    0.98    0.50 
  -3  10  -2    1.18    0.38 
  -3 -10   2    0.84    0.34 
   3 -10   2    1.78    0.55 
  -3 -10  -2    1.72    0.59 
  -3  10   2    1.61    0.51 
   3  10  -2    1.17    0.56 
   3 -10   2    0.52    0.44 
  -3  10   2    0.85    0.55 
  -3 -10   4   16.00    1.18 
  -3 -10   4   13.01    1.23 
   3  10   4   14.77    0.82 
   3  10   4   15.64    1.31 
  -3  10  -4   15.32    1.32 
   3 -10  -4   13.42    1.12 
  -3 -10  -4   16.92    1.22 
  -3  10   4   14.75    0.88 
  -3  10   4   14.38    0.83 
   3 -10   4   16.09    1.27 
  -3  10   4   17.58    1.34 
   3 -10   4   15.83    1.19 
   3  10  -4   15.20    1.30 
   3  10   6    6.77    1.31 
   3  10   6    5.64    0.80 
   3 -10  -6    4.31    0.82 
  -3 -10   6    5.32    1.05 
  -3 -10   6    4.69    0.95 
  -3  10  -6    6.96    1.37 
  -3  10   6    5.42    0.78 
  -3 -10  -6    8.17    1.06 
   3  10  -6    6.69    1.25 
   3 -10   6    4.59    0.97 
  -3  10   6    6.92    0.80 
   3 -10   6    4.71    0.99 
  -3  10   6    5.82    1.21 
  -3 -10   8    3.09    1.10 
  -3  10  -8    3.15    1.23 
   3  10   8    2.25    1.30 
   3  10   8    2.10    0.81 
  -3 -10   8    2.99    1.11 
  -3  10   8    2.96    1.39 
   3 -10   8    1.70    0.98 
   3 -10   8    3.95    1.24 
  -3  10   8    2.35    0.80 
   3  10  -8    2.80    1.23 
   3 -11  -1    1.13    0.32 
  -3 -11   1    2.39    0.54 
   3  11   1    3.09    0.56 
  -3 -11   1    2.55    0.46 
  -3  11  -1    2.04    0.50 
  -3 -11   1    2.24    0.50 
  -3  11  -1    2.32    0.58 
   3  11  -1    2.06    0.59 
  -3  11   1    2.70    0.51 
  -3 -11  -1    2.87    0.37 
  -3  11   1    1.94    0.58 
   3 -11   1    1.93    0.49 
  -3 -11  -1    1.69    0.60 
   3 -11   1    3.36    0.60 
   3  11   3   36.75    1.66 
   3 -11  -3   36.18    1.57 
  -3  11  -3   38.30    1.60 
  -3 -11   3   37.40    1.11 
  -3 -11   3   35.75    1.62 
  -3 -11   3   36.41    1.56 
   3 -11   3   38.23    1.61 
  -3 -11  -3   37.45    1.65 
  -3  11   3   36.69    1.12 
   3 -11   3   36.53    1.03 
  -3  11   3   38.19    1.64 
   3 -11   3   35.50    1.59 
   3  11  -3   34.48    1.59 
   3 -11  -5   19.05    1.36 
  -3 -11   5   22.84    1.53 
   3  11   5   18.65    1.61 
   3  11   5   19.28    1.02 
  -3  11  -5   21.45    1.65 
  -3 -11   5   19.32    1.55 
   3  11  -5   19.13    1.59 
  -3  11   5   21.24    1.11 
  -3  11   5   18.22    1.60 
   3 -11   5   24.19    1.56 
  -3  11   5   23.15    1.14 
  -3 -11  -5   21.00    1.44 
   3 -11   5   18.29    1.41 
  -3  11  -7   11.29    1.69 
   3  11   7   10.61    1.59 
   3  11   7   12.66    1.12 
   3 -11  -7    9.79    1.17 
  -3 -11   7   12.51    1.53 
  -3 -11   7   10.81    1.44 
   3 -11   7    9.78    1.35 
  -3  11   7   14.53    1.54 
  -3 -11  -7   13.27    1.38 
  -3  11   7   10.95    1.75 
   3  11  -7   12.45    1.68 
   3 -11   7   11.47    1.50 
  -3  11   7   11.70    1.19 
  -3  11  -9    1.81    1.36 
  -3 -11   9    1.67    1.09 
  -3 -11   9    1.69    1.02 
   3  11   9    1.43    1.31 
   3 -11   9    3.49    1.25 
  -3  11   9    1.40    1.37 
   3 -11   9    1.75    1.18 
   3  11  -9    2.59    1.27 
   3  12   0   53.46    1.77 
   3 -12   0   52.97    1.49 
  -3 -12   0   52.93    1.60 
  -3 -12   0   52.93    1.35 
  -3 -12   0   55.06    1.76 
  -3  12   0   53.45    1.72 
  -3  12   0   53.06    1.76 
   3 -12  -2   42.64    1.17 
  -3  12  -2   46.14    1.41 
  -3 -12   2   45.82    1.58 
  -3  12  -2   43.89    1.64 
  -3 -12   2   42.35    1.38 
  -3 -12   2   43.27    1.69 
   3  12   2   42.52    1.61 
   3  12  -2   43.25    1.69 
  -3  12   2   45.94    1.61 
  -3 -12  -2   45.71    1.75 
  -3  12   2   45.70    1.78 
   3 -12   2   43.40    1.71 
   3 -12   2   45.57    1.62 
   3 -12  -4   11.99    1.12 
   3  12   4   11.80    0.67 
  -3 -12   4   11.90    1.18 
  -3  12  -4   11.79    1.26 
  -3 -12   4    9.63    1.07 
   3  12   4   12.01    1.25 
  -3  12   4   12.96    1.27 
   3 -12   4   10.69    1.11 
   3  12  -4   11.69    1.25 
  -3 -12  -4   10.42    1.08 
  -3  12   4   11.95    0.72 
   3 -12   4   11.59    1.11 
  -3  12  -6   13.53    1.65 
   3 -12  -6   12.56    1.27 
  -3 -12   6   13.85    1.51 
  -3 -12   6   16.15    1.63 
   3  12   6   12.45    0.99 
   3  12   6   11.76    1.57 
  -3  12   6   14.41    1.05 
   3 -12   6   11.85    1.33 
  -3 -12  -6   12.65    1.32 
   3  12  -6   10.38    1.41 
   3 -12   6   14.25    1.56 
  -3  12   6   12.38    1.03 
  -3  12   6   13.38    1.68 
  -3 -12   8   19.71    2.07 
   3  12   8   15.66    2.17 
  -3 -12   8   19.45    2.02 
   3 -12  -8   16.94    1.61 
  -3  12  -8   19.70    2.20 
  -3 -12  -8   18.77    1.71 
   3 -12   8   17.79    1.94 
  -3  12   8   17.68    2.25 
  -3  12   8   19.85    1.45 
   3  12  -8   19.18    2.13 
   3 -12   8   19.79    2.12 
  -3 -13   1   36.99    1.48 
  -3 -13   1   39.06    1.29 
  -3 -13   1   36.48    1.38 
   3  13   1   38.32    1.45 
  -3  13  -1   37.02    1.52 
  -3  13  -1   39.43    1.44 
   3 -13  -1   40.02    1.11 
  -3  13   1   38.89    1.60 
  -3 -13  -1   36.30    1.55 
   3 -13   1   38.71    1.37 
  -3 -13  -1   41.17    1.22 
   3  13  -1   40.04    1.60 
  -3  13   1   41.14    1.43 
   3 -13   1   37.24    1.53 
   3 -13  -3    2.24    0.66 
   3 -13  -3    2.16    0.39 
   3  13   3    3.70    0.75 
  -3 -13   3    3.51    0.69 
  -3  13  -3    2.90    0.75 
  -3 -13   3    2.88    0.43 
  -3 -13   3    3.57    0.69 
  -3  13   3    2.60    0.68 
  -3 -13  -3    1.76    0.64 
   3  13  -3    2.74    0.78 
   3 -13   3    2.89    0.64 
   3 -13   3    3.18    0.40 
   3 -13   3    2.85    0.67 
   3  13   5    1.82    0.89 
   3  13   5    2.14    0.46 
   3 -13  -5    1.43    0.73 
  -3 -13   5    1.68    0.76 
  -3 -13   5    1.83    0.73 
  -3  13  -5    2.53    0.94 
  -3  13   5    1.81    0.83 
   3  13  -5    1.82    0.88 
  -3  13   5    3.26    0.56 
   3 -13   5    1.64    0.77 
   3 -13   5    1.80    0.75 
  -3 -13  -5    1.57    0.77 
  -3 -13   7   13.55    1.61 
   3  13   7   14.62    1.11 
  -3  13  -7   15.04    1.80 
  -3 -13   7   13.84    1.65 
   3 -13  -7   10.41    1.30 
   3  13   7   16.08    2.04 
   3 -13   7   12.45    1.62 
   3  13  -7   11.12    1.56 
   3 -13   7   15.02    1.73 
  -3  13   7   13.90    1.98 
  -3  13   7   13.81    1.12 
  -3 -13  -7   14.27    1.49 
  -3 -13   9    2.25    1.09 
   3  13   9    2.71    1.48 
  -3 -13   9    2.24    1.20 
  -3  13  -9    5.12    1.64 
   3 -13   9    2.79    1.35 
   3 -13   9    3.66    1.26 
  -3  13   9    3.05    1.63 
   3  13  -9    4.36    1.52 
   3  14   0   69.10    2.20 
   3 -14   0   71.61    1.87 
  -3 -14   0   74.28    2.22 
  -3 -14   0   68.63    1.72 
  -3  14   0   72.20    2.24 
  -3 -14   0   70.90    2.02 
  -3  14   0   69.74    2.16 
   3 -14  -2   13.40    0.61 
   3 -14  -2   12.76    1.07 
  -3  14  -2   14.07    1.15 
  -3 -14   2   12.44    1.09 
  -3 -14   2   11.80    0.80 
  -3 -14   2   13.26    0.94 
   3  14   2   13.69    1.02 
   3 -14   2   15.84    1.15 
   3  14  -2   14.68    1.17 
  -3 -14  -2   13.31    0.61 
  -3  14   2   13.20    0.98 
  -3 -14  -2   13.50    1.16 
   3 -14   2   13.08    0.78 
   3 -14   2   11.54    0.95 
  -3 -14   4   10.21    1.11 
   3  14   4    9.18    1.23 
  -3 -14   4    8.86    1.08 
  -3  14  -4    6.40    1.03 
   3 -14  -4    9.06    1.09 
  -3 -14  -4    8.97    1.08 
  -3  14   4    7.29    0.63 
   3  14  -4    9.43    1.13 
   3 -14   4    8.85    1.09 
   3 -14   4    6.49    0.95 
  -3  14   4    9.22    1.17 
   3  14   6   22.20    1.92 
  -3 -14   6   19.41    1.73 
   3 -14  -6   17.46    1.49 
   3  14   6   21.97    1.09 
  -3 -14   6   21.83    1.71 
  -3  14  -6   20.26    1.83 
  -3  14   6   22.81    1.18 
   3  14  -6   21.23    1.79 
  -3  14   6   23.58    1.95 
   3 -14   6   18.23    1.64 
  -3 -14  -6   21.66    1.64 
   3 -14   6   18.26    1.73 
  -3  14  -8    3.45    1.41 
  -3 -14   8    1.77    1.08 
   3  14   8    2.19    1.20 
   3 -14  -8    1.02    0.88 
  -3 -14   8   -0.17    0.93 
  -3 -14  -8    0.95    0.96 
   3 -14   8    0.33    1.04 
   3  14  -8    1.65    1.17 
  -3  14   8   -0.37    1.04 
   3 -14   8    2.27    1.13 
   3 -15  -1    3.17    0.67 
  -3 -15   1    2.92    0.59 
  -3 -15   1    4.16    0.52 
  -3  15  -1    3.25    0.69 
   3 -15  -1    3.98    0.43 
  -3 -15   1    2.86    0.58 
   3  15   1    3.47    0.64 
  -3  15   1    4.12    0.68 
   3 -15   1    3.54    0.66 
   3 -15   1    3.87    0.57 
   3 -15   1    3.75    0.61 
  -3 -15  -1    3.85    0.49 
   3  15  -1    4.03    0.78 
  -3 -15  -1    3.23    0.71 
   3 -15  -3    1.30    0.65 
   3 -15  -3    2.23    0.36 
   3  15   3    1.57    0.65 
  -3 -15   3    0.84    0.53 
  -3  15  -3    0.80    0.67 
  -3 -15   3    1.73    0.42 
  -3 -15   3    2.72    0.73 
  -3  15   3    1.81    0.67 
  -3 -15  -3    2.85    0.75 
   3  15  -3    1.62    0.71 
   3 -15   3    1.02    0.63 
   3 -15   3    1.82    0.60 
   3 -15   3    2.15    0.42 
   3  15   5    6.31    0.60 
   3 -15  -5    4.76    0.94 
  -3  15  -5    5.31    1.16 
  -3 -15   5    6.65    1.13 
   3  15   5    6.05    1.16 
  -3 -15   5    5.21    0.98 
  -3  15   5    7.25    0.68 
  -3 -15  -5    7.05    1.11 
   3 -15   5    3.53    0.86 
   3 -15   5    7.23    1.14 
   3  15  -5    6.42    1.23 
  -3  15   5    5.35    1.18 
  -3  15  -7    0.87    1.12 
   3 -15  -7   -0.17    0.71 
  -3 -15   7    0.86    0.88 
  -3 -15   7    0.56    0.90 
   3  15   7    1.39    1.06 
   3  15  -7    1.28    0.97 
   3 -15   7    0.82    0.88 
  -3 -15  -7    2.84    0.99 
   3 -15   7    1.78    0.98 
  -3  15   7    1.32    1.07 
   3  15   9    8.71    1.93 
  -3 -15   9    6.99    1.59 
  -3  15  -9    8.41    1.65 
  -3 -15   9   10.41    1.65 
  -3  15   9   12.60    2.35 
   3  15  -9    7.55    1.56 
   3 -15   9    8.15    1.60 
   3 -15   9   13.52    2.05 
  -3 -16   0   14.92    1.06 
  -3 -16   0   14.20    0.64 
  -3 -16   0   14.19    0.92 
  -3  16   0   16.23    1.14 
   3 -16   0   14.85    0.82 
   3  16   0   16.04    1.21 
   3 -16   0   14.43    1.05 
  -3 -16   2    9.01    0.85 
  -3 -16   2    9.26    0.96 
  -3  16  -2   10.21    1.14 
   3 -16  -2    7.03    0.90 
   3  16   2   10.37    0.97 
  -3 -16   2    9.37    0.82 
  -3 -16  -2    9.74    0.62 
   3 -16   2    9.89    0.91 
  -3 -16  -2    8.53    1.01 
   3 -16   2    9.05    0.80 
   3 -16   2    8.96    0.95 
   3  16  -2    8.73    1.02 
  -3  16   2    8.91    0.93 
   3  16   4    6.90    1.08 
   3 -16  -4   10.09    0.64 
  -3 -16   4   10.61    1.21 
  -3 -16   4    8.03    0.58 
  -3  16  -4    6.93    1.08 
   3 -16  -4    8.12    1.12 
  -3 -16   4    8.37    1.04 
   3  16  -4    8.00    1.11 
  -3 -16  -4    8.48    1.11 
  -3  16   4    7.92    1.19 
   3 -16   4    6.78    0.52 
   3 -16   4    7.65    1.08 
   3 -16   4    8.47    1.08 
   3  16   6    5.89    1.36 
  -3 -16   6    6.21    1.17 
  -3 -16   6    6.02    1.21 
   3 -16  -6    8.21    1.18 
  -3  16  -6   10.16    1.43 
   3 -16   6    6.20    1.22 
  -3  16   6    9.18    0.86 
   3  16  -6    8.55    1.48 
   3 -16   6    5.84    1.14 
  -3  16   6    8.88    1.52 
  -3 -16  -6    9.58    1.28 
  -3  16  -8   10.00    1.64 
  -3 -16   8   11.99    1.75 
   3  16   8   10.92    1.95 
  -3 -16   8    9.81    1.66 
   3 -16  -8    7.72    1.31 
  -3  16   8   12.36    2.17 
   3  16  -8    8.12    1.66 
   3 -16   8    9.51    1.66 
   3 -16   8   10.17    1.71 
  -3 -16  -8    9.91    1.45 
   3 -17  -1    8.28    0.96 
  -3 -17   1   10.46    0.92 
  -3 -17   1    8.07    0.86 
   3  17   1    7.48    0.87 
  -3 -17   1    7.27    0.69 
   3 -17  -1    8.39    0.62 
  -3  17  -1    8.39    1.06 
   3  17  -1    8.29    1.05 
  -3  17   1    8.74    0.96 
  -3 -17  -1    7.91    0.73 
   3 -17   1    9.88    0.97 
  -3 -17  -1    9.76    1.06 
   3 -17   1    8.22    0.78 
   3 -17   1    8.74    0.83 
  -3  17  -3    5.21    1.00 
   3 -17  -3    3.09    0.79 
  -3 -17   3    4.15    0.82 
  -3 -17   3    4.63    0.61 
   3  17   3    5.95    0.90 
  -3 -17   3    3.91    0.72 
   3 -17   3    5.98    0.84 
  -3  17   3    6.11    0.97 
   3 -17   3    4.53    0.56 
   3 -17   3    7.16    1.00 
  -3 -17  -3    5.15    0.94 
   3  17  -3    5.24    0.96 
   3 -17  -5    1.23    0.78 
   3  17   5    2.37    0.93 
  -3 -17   5    1.30    0.78 
  -3 -17   5    0.35    0.67 
  -3  17  -5    1.18    0.95 
   3 -17   5    0.14    0.70 
  -3 -17  -5    1.05    0.82 
   3 -17   5    0.20    0.67 
  -3  17   5    0.52    0.77 
   3  17  -5   -0.04    0.93 
  -3 -17   7    8.75    1.50 
  -3 -17   7    9.08    1.46 
   3  17   7   11.03    1.80 
  -3  17  -7    8.08    1.54 
   3 -17  -7    6.80    1.21 
  -3 -17  -7    8.12    1.32 
   3  17  -7    8.47    1.52 
  -3  17   7    9.50    1.76 
   3 -17   7    7.82    1.41 
   3 -17   7    7.23    1.38 
  -3 -17   9    0.48    0.99 
  -3  17  -9    2.58    1.38 
  -3 -17   9    0.29    1.13 
   3  17   9   -0.98    1.27 
   3 -17   9    0.34    1.11 
   3  17  -9    2.32    1.29 
  -3  17   9    1.88    1.53 
   3 -17   9    1.11    1.27 
  -3 -18   0   11.54    1.08 
  -3  18   0   11.71    1.15 
   3 -18   0   10.78    1.01 
  -3 -18   0   10.78    0.59 
   3 -18   0   10.08    0.74 
  -3 -18   0   10.10    0.90 
   3  18   0   12.35    1.20 
  -3 -18   2   39.54    1.80 
  -3 -18   2   41.71    1.60 
  -3 -18   2   43.43    1.61 
   3  18   2   40.59    1.73 
  -3  18  -2   41.98    1.92 
   3 -18  -2   39.74    1.87 
  -3  18   2   39.25    1.69 
   3  18  -2   39.92    1.94 
   3 -18   2   41.55    1.57 
   3 -18   2   45.39    1.92 
   3 -18   2   42.83    1.69 
  -3 -18  -2   42.95    1.31 
  -3 -18  -2   42.72    1.91 
   3  18   4   15.11    1.44 
   3 -18  -4   16.32    1.42 
  -3 -18   4   16.32    1.47 
  -3 -18   4   17.06    1.36 
  -3 -18   4   14.49    0.83 
  -3  18  -4   17.20    1.54 
   3 -18   4   16.50    0.80 
  -3 -18  -4   16.57    1.47 
   3 -18   4   16.13    1.47 
   3  18  -4   18.53    1.66 
  -3  18   4   16.10    1.45 
   3 -18   4   18.02    1.40 
  -3 -18   6   13.62    1.54 
   3 -18  -6   12.37    1.43 
  -3  18  -6   12.06    1.57 
  -3 -18   6   13.00    1.59 
   3  18   6   15.27    1.91 
   3 -18   6   10.96    1.43 
   3  18  -6   11.80    1.60 
  -3 -18  -6   13.77    1.54 
   3 -18   6   14.11    1.64 
  -3  18   6   10.55    1.66 
  -3 -18   8    2.00    1.13 
  -3 -18   8   -0.02    0.98 
   3 -18  -8    2.10    1.02 
   3  18   8    0.94    1.28 
  -3  18  -8    1.63    1.28 
   3  18  -8    2.10    1.30 
   3 -18   8    3.72    1.26 
   3 -18   8    1.67    1.16 
  -3  18   8    2.06    1.41 
  -3 -18  -8    0.57    1.00 
  -3 -19   1   20.77    0.99 
  -3 -19   1   21.79    1.27 
   3 -19  -1   19.22    1.34 
   3 -19  -1   20.18    0.84 
  -3 -19   1   19.27    1.25 
   3  19   1   23.72    1.34 
  -3  19  -1   21.75    1.50 
  -3  19   1   19.89    1.28 
   3 -19   1   20.40    1.35 
   3 -19   1   22.03    1.25 
   3 -19   1   21.18    1.09 
  -3 -19  -1   21.56    1.40 
  -3 -19  -1   20.56    1.04 
   3  19  -1   20.02    1.50 
  -3 -19   3   43.71    2.03 
  -3  19  -3   38.52    2.02 
   3  19   3   41.35    1.94 
  -3 -19   3   42.62    1.80 
  -3 -19   3   38.61    1.51 
   3 -19  -3   42.28    2.01 
   3  19  -3   38.86    2.06 
   3 -19   3   40.75    1.82 
  -3 -19  -3   40.43    2.00 
   3 -19   3   40.71    1.48 
   3 -19   3   40.61    1.99 
  -3  19   3   38.25    1.87 
  -3 -19   5   -0.82    0.68 
   3  19   5    0.25    0.79 
   3 -19  -5    0.29    0.70 
  -3  19  -5    1.21    0.97 
  -3 -19   5   -0.56    0.59 
   3 -19   5   -0.23    0.63 
   3  19  -5    1.54    0.94 
  -3 -19  -5    0.52    0.76 
   3 -19   5    0.12    0.71 
  -3  19   5   -0.36    0.75 
   3  19   7    3.55    1.44 
  -3  19  -7    4.08    1.36 
  -3 -19   7    6.09    1.38 
   3 -19  -7    3.77    1.08 
  -3 -19   7    2.99    1.08 
   3  19  -7    6.24    1.51 
  -3 -19  -7    6.43    1.34 
   3 -19   7    4.82    1.24 
   3 -19   7    5.57    1.31 
  -3  19   7    4.07    1.35 
   3 -20   0    2.29    0.47 
  -3 -20   0    3.92    0.80 
   3  20   0    2.62    0.81 
  -3 -20   0    2.42    0.58 
   3 -20   0    2.74    0.73 
   3 -20   0    2.30    0.68 
  -3  20   0    3.06    0.82 
  -3 -20   0    2.37    0.36 
  -3 -20   2    3.58    0.70 
   3 -20  -2    2.34    0.79 
   3  20   2    4.55    0.86 
  -3 -20   2    4.61    0.84 
  -3 -20   2    4.47    0.71 
  -3  20  -2    3.48    0.95 
  -3 -20  -2    3.21    0.89 
   3 -20   2    3.04    0.81 
   3 -20   2    3.97    0.70 
  -3 -20  -2    4.32    0.54 
  -3  20   2    5.87    0.90 
   3 -20   2    5.46    0.75 
   3  20  -2    5.37    1.02 
   3 -20  -4   -0.20    0.71 
   3  20   4    0.37    0.67 
  -3 -20   4   -0.14    0.59 
  -3  20  -4    0.87    0.92 
  -3 -20   4   -0.53    0.40 
  -3 -20   4    1.08    0.73 
   3  20  -4   -0.72    0.92 
   3 -20   4    0.09    0.39 
  -3  20   4    0.00    0.72 
   3 -20   4    0.23    0.69 
  -3 -20  -4   -1.08    0.69 
   3 -20   4    0.49    0.61 
   3  20   6    1.55    1.08 
  -3 -20   6    0.54    0.90 
  -3 -20   6    3.02    1.01 
  -3  20  -6    1.16    1.10 
   3 -20  -6    2.49    0.99 
  -3 -20  -6    0.66    0.96 
   3  20  -6    0.90    1.03 
   3 -20   6    0.73    0.87 
   3 -20   6    1.88    0.96 
  -3  20   6    1.51    1.07 
  -3  20  -8    0.83    1.22 
   3  20   8    0.06    1.15 
   3 -20  -8    1.24    0.97 
  -3 -20   8   -1.14    0.91 
  -3 -20   8   -0.72    0.98 
   3  20  -8    0.66    1.24 
   3 -20   8    1.19    1.16 
  -3 -20  -8    0.23    0.99 
  -3  20   8    0.92    1.33 
   3 -20   8   -0.42    0.95 
  -3 -21   1    3.61    0.56 
   3 -21  -1    3.10    0.81 
  -3 -21   1    4.22    0.76 
  -3  21  -1    3.56    1.01 
   3  21   1    4.09    0.86 
   3 -21  -1    3.33    0.44 
  -3 -21   1    3.61    0.76 
   3 -21   1    4.25    0.64 
  -3 -21  -1    4.28    0.63 
   3 -21   1    2.06    0.73 
  -3 -21  -1    2.57    0.85 
   3  21  -1    5.36    1.04 
  -3  21   1    4.13    0.85 
   3 -21   1    4.44    0.79 
  -3  21  -3    0.87    0.86 
  -3 -21   3    1.67    0.72 
  -3 -21   3    0.85    0.52 
   3 -21  -3    0.22    0.69 
   3  21   3    0.41    0.64 
  -3 -21   3   -0.17    0.50 
   3 -21   3    0.14    0.47 
  -3 -21  -3    0.41    0.80 
   3 -21   3    0.81    0.72 
   3 -21   3    0.20    0.55 
   3  21  -3    0.83    0.85 
  -3  21   3    0.05    0.62 
  -3 -21   5    0.67    0.75 
  -3 -21   5    2.70    0.97 
   3  21   5    2.17    0.99 
   3 -21  -5    0.52    0.85 
  -3  21  -5    1.68    1.02 
  -3  21   5    1.17    0.87 
   3 -21   5    2.54    0.86 
   3  21  -5    0.89    1.12 
   3 -21   5    1.28    0.89 
  -3 -21  -5    0.03    0.83 
  -3 -21   7    2.21    1.15 
   3 -21  -7    2.14    1.03 
   3  21   7    1.51    1.18 
  -3 -21   7    1.66    0.99 
  -3  21  -7    0.20    1.22 
   3 -21   7    1.66    1.05 
   3 -21   7    0.92    1.00 
   3  21  -7    2.94    1.32 
  -3 -21  -7    2.30    1.11 
  -3  21   7    2.84    1.38 
  -3  22   0   35.50    1.83 
   3 -22   0   33.41    1.69 
  -3 -22   0   32.02    1.70 
   3  22   0   32.61    1.86 
  -3 -22   0   32.07    1.07 
   3 -22   0   32.83    1.26 
   3 -22   0   32.37    1.75 
  -3 -22   0   32.69    1.53 
  -3 -22   2   19.53    1.26 
  -3  22  -2   22.36    1.74 
  -3 -22   2   20.61    1.21 
  -3 -22   2   19.50    1.48 
   3  22   2   21.79    1.45 
   3 -22  -2   21.09    1.62 
   3 -22   2   20.78    1.26 
   3  22  -2   20.51    1.72 
   3 -22   2   23.25    1.60 
   3 -22   2   20.10    1.26 
  -3  22   2   20.57    1.42 
  -3 -22  -2   19.11    1.01 
  -3 -22  -2   20.78    1.58 
  -3 -22   4    8.69    1.13 
  -3 -22   4    7.05    1.17 
   3 -22  -4    8.93    1.27 
   3  22   4    7.55    1.23 
  -3  22  -4    8.78    1.39 
  -3  22   4    9.08    1.35 
  -3 -22  -4   11.17    1.39 
   3 -22   4    9.20    1.32 
   3 -22   4    9.53    1.21 
   3  22  -4    8.84    1.38 
  -3 -22   6    2.58    1.01 
   3  22   6    3.20    1.15 
   3 -22  -6    3.05    1.01 
  -3 -22   6    3.92    1.08 
  -3  22  -6    3.28    1.27 
  -3  22   6    2.26    1.13 
  -3 -22  -6    1.81    0.97 
   3 -22   6    0.70    0.82 
   3  22  -6    0.73    1.10 
   3 -22   6    2.82    1.11 
   3  22   8    6.65    1.79 
  -3  22  -8    5.23    1.64 
  -3 -22   8    3.93    1.40 
  -3 -22   8    4.58    1.47 
   3 -22  -8    2.20    1.13 
  -3 -22  -8    3.61    1.35 
   3  22  -8    4.27    1.48 
   3 -22   8    4.02    1.36 
  -3  22   8    5.77    1.69 
   3 -22   8    4.83    1.48 
   3 -23  -1   44.28    1.82 
  -3 -23   1   39.39    1.84 
  -3 -23   1   41.29    1.89 
   3  23   1   41.33    1.93 
   3 -23  -1   38.11    1.98 
  -3  23  -1   42.53    2.17 
   3 -23  -1   40.37    1.27 
  -3 -23   1   41.65    1.48 
  -3 -23  -1   42.07    1.63 
   3 -23   1   43.40    1.91 
   3 -23   1   43.01    1.62 
  -3  23   1   41.22    1.91 
  -3 -23  -1   40.99    2.03 
   3 -23   1   39.03    1.95 
   3  23  -1   41.19    2.15 
  -3 -23   3   31.32    1.63 
   3  23   3   29.84    1.81 
  -3  23  -3   34.59    2.12 
  -3 -23   3   33.99    1.95 
  -3 -23   3   29.45    1.46 
   3 -23  -3   31.67    1.91 
   3 -23   3   29.88    1.96 
   3 -23   3   30.38    1.68 
  -3 -23  -3   33.36    1.99 
  -3  23   3   32.25    1.83 
   3 -23   3   32.18    1.48 
   3  23  -3   33.17    2.14 
  -3 -23   5    7.80    1.17 
  -3 -23   5    7.14    1.30 
   3  23   5    8.33    1.43 
   3 -23  -5    9.75    1.40 
  -3  23  -5    8.93    1.49 
   3 -23   5   10.28    1.37 
  -3  23   5    9.00    1.57 
  -3 -23  -5    7.06    1.30 
   3  23  -5    6.34    1.37 
   3 -23   5    7.80    1.38 
   3 -23  -7    1.07    0.93 
  -3 -23   7    2.55    1.07 
  -3 -23   7    1.19    0.99 
   3  23   7   -0.04    1.09 
  -3  23  -7    0.36    1.18 
   3 -23   7   -0.44    0.87 
  -3 -23  -7    0.63    1.01 
   3 -23   7    2.40    1.14 
   3  23  -7   -0.30    1.25 
  -3  23   7    1.08    1.16 
   3 -24   0    0.30    0.62 
   3 -24   0    0.44    0.69 
   3  24   0    0.52    0.78 
  -3 -24   0   -0.72    0.70 
  -3 -24   0    0.31    0.51 
  -3  24   0    0.66    0.80 
   3 -24   0    0.37    0.38 
   3 -24  -2    9.80    1.31 
  -3 -24   2   10.97    1.14 
  -3  24  -2    9.51    1.37 
  -3 -24   2   10.10    0.98 
   3  24   2   10.86    1.32 
  -3 -24   2   10.49    1.19 
   3 -24   2   11.33    1.11 
  -3  24   2   10.10    1.20 
   3 -24   2    7.60    1.10 
   3  24  -2   12.84    1.57 
  -3 -24  -2    8.41    0.83 
  -3 -24  -2    9.73    1.30 
   3 -24   2   11.76    1.12 
  -3 -24   4    7.10    1.25 
   3  24   4    6.28    1.19 
   3 -24  -4    9.11    1.27 
  -3 -24   4    7.15    1.03 
  -3  24  -4    7.97    1.49 
  -3 -24  -4    8.28    1.28 
   3 -24   4    7.60    1.12 
  -3  24   4    7.36    1.25 
   3  24  -4    6.66    1.38 
   3 -24   4    7.64    1.24 
  -3  24  -6    3.08    1.38 
  -3 -24   6    4.48    1.19 
   3 -24  -6    2.43    1.05 
   3  24   6    2.85    1.22 
  -3 -24   6    4.35    1.28 
   3  24  -6    3.90    1.34 
   3 -24   6    4.01    1.21 
  -3 -24  -6    2.39    1.10 
   3 -24   6    2.73    1.01 
  -3  24   6    3.42    1.35 
  -3  24  -8    1.08    1.36 
   3  24   8    1.94    1.45 
  -3 -24   8    0.37    1.05 
  -3 -24   8    0.66    0.94 
   3 -24  -8    1.92    1.19 
  -3  24   8    0.59    1.35 
   3 -24   8   -0.21    1.07 
  -3 -24  -8    1.48    1.15 
   3 -24   8    0.40    1.10 
   3  24  -8    1.76    1.38 
  -3 -25   1    3.87    0.81 
  -3  25  -1    2.92    1.04 
   3 -25  -1    2.43    0.87 
   3 -25  -1    4.97    0.87 
   3  25   1    2.40    0.78 
  -3 -25   1    2.84    0.84 
  -3 -25   1    2.86    0.56 
   3 -25   1    4.39    0.68 
  -3 -25  -1    3.21    0.66 
   3 -25   1    2.82    0.78 
  -3  25   1    4.23    0.91 
   3  25  -1    2.20    0.93 
  -3 -25  -1    5.21    1.02 
   3 -25   1    3.97    0.91 
  -3 -25   3    3.24    0.74 
  -3 -25   3    4.83    0.85 
  -3  25  -3    2.40    1.11 
  -3 -25   3    3.75    0.96 
   3 -25  -3    1.52    0.92 
   3  25   3    3.43    0.94 
  -3 -25  -3    3.66    1.04 
  -3  25   3    3.19    0.93 
   3  25  -3    1.95    1.07 
   3 -25   3    3.67    0.72 
   3 -25   3    4.36    0.85 
   3 -25   3    3.35    0.98 
  -3 -25   5    3.22    1.13 
  -3 -25   5    2.23    0.91 
  -3  25  -5    4.52    1.40 
   3  25   5    3.83    1.19 
   3 -25  -5    4.76    1.14 
  -3  25   5    4.38    1.22 
   3 -25   5    4.69    1.05 
  -3 -25  -5    2.18    1.05 
   3  25  -5    2.84    1.30 
   3 -25   5    4.98    1.24 
   3 -25  -7    0.02    0.99 
  -3 -25   7   -0.71    0.93 
   3  25   7    0.31    1.20 
  -3 -25   7    0.29    0.95 
  -3  25  -7   -0.22    1.34 
  -3 -25  -7   -0.55    0.99 
   3 -25   7    0.95    1.04 
   3  25  -7    1.73    1.37 
  -3  25   7   -0.91    1.17 
   3 -25   7   -0.38    1.05 
  -3 -26   0    2.94    0.72 
   3 -26   0    3.73    0.86 
   3 -26   0    3.82    0.92 
   3  26   0    3.35    1.00 
   3 -26   0    3.24    0.55 
  -3 -26   0    1.31    0.84 
  -3  26   0    2.74    0.96 
   3  26   2   13.56    1.39 
  -3 -26   2   12.18    1.05 
  -3  26  -2   14.49    1.77 
  -3 -26   2   11.03    1.25 
   3 -26  -2   13.01    1.44 
  -3 -26   2   14.52    1.35 
   3 -26  -2   11.69    1.12 
   3  26  -2   11.92    1.61 
   3 -26   2   14.20    1.18 
   3 -26   2   13.50    1.28 
  -3 -26  -2   15.37    1.59 
  -3  26   2   14.85    1.43 
   3 -26   2   10.94    1.31 
  -3 -26  -2   13.25    0.99 
  -3 -26   4    3.90    0.87 
   3  26   4    3.41    1.14 
   3 -26  -4    3.28    1.09 
  -3 -26   4    5.79    1.15 
  -3  26  -4    3.85    1.32 
   3  26  -4    3.80    1.26 
  -3 -26  -4    5.10    1.22 
   3 -26   4    3.90    0.91 
   3 -26   4    4.07    1.16 
  -3  26   4    3.84    1.19 
   3  26   6    4.43    1.34 
   3 -26  -6    7.64    1.41 
  -3  26  -6    4.30    1.57 
  -3 -26   6    6.58    1.44 
  -3 -26   6    5.73    1.21 
   3 -26   6    4.25    1.29 
  -3 -26  -6    2.17    1.16 
  -3  26   6    7.16    1.63 
   3 -26   6    3.37    1.13 
   3  26  -6    4.53    1.54 
   3 -27  -1   14.12    1.36 
  -3  27  -1   16.14    1.77 
   3 -27  -1   14.63    1.53 
   3  27   1   14.18    1.46 
  -3 -27   1   14.60    1.45 
  -3 -27   1   14.28    1.35 
  -3 -27   1   13.89    0.93 
   3 -27   1   15.23    1.45 
   3 -27   1   13.78    1.06 
   3 -27   1   14.03    1.40 
  -3 -27  -1   13.89    1.14 
  -3  27   1   13.59    1.46 
   3  27  -1   11.54    1.55 
  -3 -27  -1   15.02    1.57 
   3  27   3    3.25    1.02 
   3 -27  -3    2.83    1.02 
  -3 -27   3    1.66    0.85 
  -3 -27   3    3.40    0.79 
  -3  27  -3    3.79    1.30 
  -3 -27   3    2.92    0.77 
   3 -27  -3    1.74    0.73 
   3 -27   3    2.89    0.76 
   3 -27   3    3.54    1.02 
   3  27  -3    2.41    1.16 
   3 -27   3    3.30    0.75 
  -3  27   3    2.90    0.96 
  -3 -27  -3    2.62    1.02 
  -3 -27   5    2.93    0.94 
  -3  27  -5    1.63    1.34 
  -3 -27   5    5.69    1.31 
   3 -27  -5    2.74    1.06 
   3  27   5    2.83    1.14 
  -3 -27  -5    2.51    1.07 
  -3  27   5    1.56    1.13 
   3 -27   5    1.30    0.98 
   3 -27   5    2.67    0.92 
   3  27  -5    2.61    1.29 
   3 -27  -7    2.06    1.18 
  -3 -27   7   -0.27    1.11 
  -3 -27   7   -0.30    0.91 
  -3  27  -7    2.52    1.63 
   3  27   7    0.62    1.34 
   3 -27   7    0.78    1.12 
  -3 -27  -7   -0.10    1.02 
   3 -27   7    1.34    1.12 
  -3  27   7   -0.63    1.24 
   3  27  -7    1.80    1.53 
   3 -28   0    0.75    0.80 
  -3 -28   0   -0.78    0.70 
   3  28   0   -0.07    0.82 
   3 -28   0    0.25    0.65 
  -3  28   0    0.36    0.87 
  -3 -28   0   -0.11    0.52 
   3  28   2    4.28    1.03 
  -3 -28   2    5.47    0.79 
   3 -28  -2    3.17    0.82 
   3 -28  -2    3.96    1.03 
  -3  28  -2    4.05    1.24 
  -3 -28   2    4.45    0.99 
  -3 -28   2    4.84    0.95 
   3 -28   2    3.76    0.86 
  -3 -28  -2    4.71    1.14 
   3 -28   2    6.04    0.89 
   3 -28   2    3.62    0.98 
  -3  28   2    3.97    1.01 
   3  28  -2    3.00    1.16 
   3 -28  -4   -1.58    0.75 
   3  28   4    0.45    0.87 
  -3  28  -4   -0.18    1.16 
  -3 -28   4   -0.42    0.67 
  -3 -28   4    0.09    0.61 
  -3 -28  -4    0.39    0.93 
   3 -28   4    0.79    0.95 
   3  28  -4   -0.47    1.10 
  -3  28   4   -0.72    0.85 
   3 -28   4    0.07    0.65 
   3  28   6    0.56    1.18 
  -3 -28   6    2.03    0.97 
  -3  28  -6    0.55    1.41 
   3 -28  -6    2.16    1.13 
  -3 -28   6    2.67    1.25 
  -3  28   6    3.32    1.38 
  -3 -28  -6    3.02    1.20 
   3 -28   6    0.56    1.05 
   3 -28   6    1.67    0.96 
   3  28  -6    1.95    1.37 
   3  29   1    7.08    1.24 
   3 -29  -1    6.85    1.03 
  -3 -29   1    5.96    0.97 
   3 -29  -1    4.64    1.10 
  -3  29  -1    6.83    1.42 
  -3 -29   1    8.12    1.24 
   3 -29   1    7.47    1.17 
  -3  29   1    7.37    1.26 
  -3 -29  -1    6.69    0.89 
  -3 -29  -1    3.22    1.08 
   3 -29   1    6.22    1.10 
   3  29  -1    6.36    1.31 
   3 -29   1    8.49    0.89 
  -3 -29   3    7.53    1.26 
   3  29   3    7.26    1.40 
  -3  29  -3    4.86    1.41 
   3 -29  -3    7.59    1.33 
  -3 -29   3    8.44    1.08 
  -3 -29   3    6.63    0.98 
   3 -29   3    6.88    1.03 
  -3  29   3    7.32    1.30 
   3  29  -3    6.54    1.64 
   3 -29   3    6.95    0.99 
  -3 -29  -3    6.56    1.32 
   3 -29   3    4.09    1.11 
  -3  29  -5   -0.01    1.32 
  -3 -29   5    0.75    0.76 
   3  29   5    0.25    0.97 
  -3 -29   5    0.35    0.94 
   3 -29  -5    0.71    0.95 
   3 -29   5    0.13    0.73 
   3 -29   5   -0.19    0.99 
  -3 -29  -5    1.44    1.09 
  -3  29   5   -0.14    1.00 
   3  29  -5    2.36    1.48 
  -3 -30   0    1.06    0.87 
  -3  30   0    1.73    0.99 
  -3 -30   0    1.40    0.65 
   3 -30   0    1.30    0.86 
   3 -30   0    1.74    0.79 
   3  30   0    1.46    0.98 
   3 -30  -2   11.26    1.18 
  -3  30  -2   10.29    1.64 
  -3 -30   2   11.01    1.38 
  -3 -30   2   13.02    1.09 
   3  30   2   10.46    1.44 
  -3 -30   2   13.89    1.43 
   3 -30  -2   13.81    1.63 
   3  30  -2   13.53    1.78 
   3 -30   2   14.80    1.23 
  -3 -30  -2   13.47    1.67 
  -3  30   2   14.95    1.69 
   3 -30   2   15.63    1.47 
   3 -30   2   12.60    1.53 
  -3  30  -4    5.68    1.56 
  -3 -30   4    5.32    1.01 
  -3 -30   4    3.95    1.12 
   3 -30  -4    5.74    1.31 
   3  30   4    5.09    1.35 
   3 -30   4    6.14    1.34 
  -3  30   4    4.68    1.38 
  -3 -30  -4    5.49    1.31 
   3  30  -4    3.27    1.40 
   3 -30   4    5.25    1.07 
  -3  30  -6   -0.39    1.46 
   3  30   6   -0.40    1.12 
   3 -30  -6    0.37    1.01 
  -3 -30   6   -0.24    0.96 
  -3 -30   6    0.53    0.84 
  -3  30   6    0.31    1.19 
  -3 -30  -6    0.10    1.06 
   3 -30   6   -1.47    0.85 
   3  30  -6   -1.88    1.23 
   3 -30   6    0.09    0.84 
  -3 -31   1    1.20    0.86 
   3  31   1    2.26    1.00 
  -3 -31   1    1.05    0.74 
   3 -31  -1    0.95    0.75 
  -3  31  -1    2.53    1.20 
   3 -31  -1    1.30    0.92 
  -3  31   1    3.14    1.09 
   3 -31   1    1.75    0.85 
   3 -31   1    1.94    0.90 
  -3 -31  -1    2.82    1.05 
   3  31  -1    0.78    1.00 
  -3 -31  -1    2.18    0.69 
   3  31   3    0.47    0.91 
  -3  31  -3   -0.50    1.23 
  -3 -31   3    0.40    0.77 
   3 -31  -3    1.61    1.03 
  -3 -31   3   -0.38    0.70 
  -3 -31   3   -0.73    0.51 
   3 -31   3   -0.17    0.79 
   3  31  -3    0.60    1.12 
   3 -31   3    0.45    0.67 
   3 -31   3    0.39    0.95 
  -3 -31  -3    0.97    1.00 
  -3  31   3   -0.77    0.84 
   3  31   5    2.12    1.32 
  -3  31  -5    0.95    1.49 
  -3 -31   5    2.69    0.91 
   3 -31  -5    2.29    1.22 
  -3 -31   5    2.43    1.16 
  -3 -31  -5    3.05    1.27 
   3 -31   5    2.84    1.01 
  -3  31   5    2.87    1.30 
   3  31  -5    1.66    1.48 
   3 -31   5    2.38    1.23 
  -3  32   0    0.74    1.05 
   3  32   0    0.06    0.90 
   3 -32   0   -0.36    0.74 
  -3 -32   0    0.80    0.93 
   3 -32   0    0.02    0.69 
  -3 -32   0    0.10    0.59 
  -3  32  -2    1.92    1.26 
  -3 -32   2    0.97    0.85 
   3 -32  -2    0.37    0.73 
   3 -32  -2    1.17    0.98 
   3  32   2    2.01    0.98 
  -3 -32   2    1.77    0.82 
  -3 -32  -2    0.73    1.02 
  -3  32   2    0.30    0.96 
   3 -32   2    2.16    1.00 
   3  32  -2    1.50    1.25 
   3 -32   2    2.81    0.92 
  -3 -32   4    6.62    1.37 
   3  32   4    5.90    1.54 
  -3  32  -4    4.24    1.65 
  -3 -32   4    4.68    1.00 
   3 -32  -4    5.46    1.33 
   3 -32   4    2.75    0.91 
   3 -32   4    5.45    1.40 
   3  32  -4    4.06    1.53 
  -3 -32  -4    5.37    1.42 
  -3  32   4    6.73    1.51 
   3 -32  -6    3.98    1.40 
  -3  32  -6    2.42    1.69 
  -3 -32   6    3.70    1.03 
   3  32   6    3.64    1.63 
  -3 -32   6    3.51    1.39 
  -3  32   6    2.66    1.52 
   3  32  -6    4.45    1.76 
   3 -32   6    4.96    1.31 
   3 -32   6    0.54    1.14 
  -3 -32  -6    3.28    1.43 
  -3 -33   1    2.80    1.08 
  -3 -33   1    1.51    0.78 
  -3  33  -1    2.07    1.33 
   3  33   1    4.77    1.31 
   3 -33  -1    4.51    1.23 
   3 -33  -1    1.63    0.85 
  -3  33   1    5.31    1.28 
   3 -33   1    5.33    1.16 
   3  33  -1    2.70    1.27 
   3 -33   1    4.38    1.10 
  -3 -33  -1    4.14    1.25 
   3 -33  -3    7.88    1.51 
  -3 -33   3    5.39    1.20 
  -3  33  -3    7.71    1.87 
   3  33   3   10.27    1.75 
   3  33  -3    8.36    1.76 
  -3 -33  -3    4.70    1.40 
   3 -33   3    4.53    1.21 
  -3  33   3    6.64    1.55 
   3 -33   3    8.54    1.18 
  -3 -33   5    0.87    0.82 
   3  33   5    0.04    1.17 
   3 -33  -5    2.30    1.22 
  -3  33  -5    1.64    1.59 
  -3 -33   5    1.44    1.09 
  -3 -33  -5    1.21    1.12 
  -3  33   5    1.41    1.28 
   3 -33   5    0.62    0.80 
   3  33  -5    2.28    1.57 
   3 -33   5   -0.60    1.01 
  -3 -34   0    1.48    1.11 
   3 -34   0    1.10    0.83 
  -3  34   0    0.30    1.11 
   3  34   0    1.52    1.13 
   3 -34   0    1.49    1.01 
  -3 -34   0    2.22    0.79 
   3 -34  -2    0.03    0.94 
  -3  34  -2    0.11    1.29 
   3  34   2    0.89    1.04 
  -3 -34   2    0.10    0.89 
  -3 -34   2    0.72    0.77 
   3 -34   2    0.20    0.78 
   3 -34   2   -0.24    0.82 
   3  34  -2   -0.20    1.17 
  -3  34   2    0.52    1.04 
  -3 -34  -2   -0.53    0.99 
  -3  34  -4   -0.99    1.44 
  -3 -34   4    0.12    0.89 
   3  34   4    1.15    1.14 
   3 -34  -4    0.94    1.11 
  -3 -34  -4    0.07    1.17 
  -3  34   4   -0.60    1.06 
   3  34  -4   -0.93    1.33 
   3 -34   4    0.53    0.78 
   3 -34   4   -1.55    0.82 
  -3 -35   1    6.08    1.30 
   3  35   1    2.23    1.20 
  -3 -35   1    3.01    0.94 
   3 -35  -1    3.31    1.23 
  -3  35  -1    0.64    1.33 
   3 -35  -1    0.19    0.81 
  -3 -35  -1    4.58    1.37 
   3 -35   1    5.26    1.23 
   3  35  -1    2.54    1.36 
  -3  35   1    1.75    1.19 
   3 -35   1    1.96    0.95 
  -3  35  -3    2.46    1.66 
   3  35   3    3.34    1.33 
  -3 -35   3    3.29    1.11 
   3 -35  -3    3.29    1.25 
   3  35  -3    2.02    1.48 
  -3  35   3    3.95    1.54 
  -3 -35  -3    2.16    1.27 
   3 -35   3    4.12    1.21 
  -3 -36   0    0.33    1.03 
  -3 -36   0    0.40    0.72 
   3  36   0    0.35    1.03 
   3 -36   0    0.29    0.80 
  -3  36   0    0.06    1.12 
   3 -36   0    0.27    0.99 
  -3  36  -2   -1.04    1.45 
   3 -36  -2    1.59    1.15 
  -3 -36   2    0.08    0.80 
  -3 -36   2    0.43    0.94 
   3  36   2   -0.86    1.03 
  -3  36   2   -0.86    1.12 
  -3 -36  -2    0.39    1.18 
   3  36  -2    0.79    1.38 
   3 -36   2   -0.42    0.81 
   3 -36   2   -0.78    0.83 
   3  36   4   -0.68    1.10 
  -3  36  -4    0.14    1.62 
   3 -36  -4    2.19    1.31 
  -3 -36   4   -0.02    0.91 
   3  36  -4   -1.98    1.39 
  -3 -36  -4    2.05    1.32 
   3 -36   4    1.43    1.08 
  -3  36   4    0.37    1.35 
  -3  37  -1    0.52    1.35 
  -3 -37   1   -1.29    0.63 
   3 -37  -1    0.26    1.06 
   3  37   1   -0.53    1.04 
  -3 -37   1    0.36    0.98 
  -3  37   1   -1.99    1.02 
  -3 -37  -1    0.55    1.15 
   3 -37   1   -0.42    0.75 
   3  37  -1   -0.71    1.21 
   3 -37   1   -0.32    0.91 
  -3 -37   3   -0.31    0.75 
  -3  37  -3    0.45    1.64 
   3 -37  -3    3.59    1.39 
   3  37   3    1.63    1.33 
  -3 -37  -3    2.55    1.37 
   3 -37   3   -0.76    0.82 
   3  37  -3   -0.28    1.41 
  -3  37   3    0.78    1.31 
  -3 -38   0    1.80    1.24 
   3  38   0    0.27    1.20 
   3 -38   0    1.28    1.06 
   3 -38   0    0.02    0.81 
  -3  38   0   -0.86    1.23 
   3  38   2   -0.42    1.17 
   3 -38  -2    2.18    1.26 
  -3 -38   2    1.01    0.85 
  -3  38  -2    0.93    1.55 
  -3 -38   2    2.83    1.26 
   3 -38   2   -0.68    0.99 
   3  38  -2   -0.92    1.41 
   3 -38   2    0.79    0.99 
  -3  38   2   -0.23    1.25 
  -3 -38  -2    1.32    1.26 
  -3 -39   1   -0.16    0.69 
  -3  39  -1    0.19    1.45 
  -3 -39   1    0.12    1.13 
   3 -39  -1   -2.10    0.97 
   3  39   1    0.96    1.27 
   3 -39   1   -0.29    0.82 
   3 -39   1    0.29    1.07 
  -3 -39  -1    0.24    1.19 
  -3  39   1   -0.57    1.28 
   3  39  -1   -1.11    1.28 
  -3  40   0    2.70    1.53 
   3 -40   0    2.47    1.32 
   3  40   0    1.76    1.41 
  -3 -40   0    3.64    1.43 
  -4   0   0  559.22   11.40 
  -4   0   0  584.20   11.48 
   4   0   0  544.86   11.55 
  -4   0  -2  159.63    3.57 
   4   0   2  163.07    3.55 
   4   0   2  164.49    3.89 
  -4   0   2  159.69    3.57 
  -4   0   2  160.73    3.72 
   4   0   2  165.05    3.68 
  -4   0   2  160.41    3.67 
   4   0   4   34.11    1.45 
  -4   0  -4   31.27    1.15 
  -4   0   4   33.92    1.43 
   4   0  -4   32.25    1.71 
   4   0   4   34.76    1.73 
   4   0   4   34.84    1.31 
  -4   0   4   35.06    1.16 
  -4   0   4   35.65    1.49 
   4   0  -6    2.82    0.52 
  -4   0  -6    1.85    0.93 
  -4   0  -6    2.39    0.54 
   4   0   6    3.81    0.82 
  -4   0   6    3.50    0.81 
   4   0  -6    3.70    1.03 
  -4   0   6    2.51    0.73 
   4   0   6    2.45    0.69 
   4   0  -8    4.40    1.25 
  -4   0   8    3.19    0.93 
   4   0   8    5.13    1.13 
  -4   0  -8    4.89    1.37 
   4   0   8    3.23    0.87 
  -4   0   8    3.00    1.00 
  -4   0  10    0.76    0.87 
   4   0  10    1.26    1.05 
  -4   0 -10    5.80    1.47 
   4   0 -10    4.31    1.45 
   4   1   1  415.60    8.56 
  -4  -1   1  414.89    8.62 
  -4   1  -1  434.69    8.64 
  -4  -1   1  424.85    8.63 
   4   1   1  415.25    8.67 
  -4  -1   1  413.72    8.68 
  -4   1   1  410.99    8.59 
  -4   1   1  412.97    8.65 
   4  -1   1  422.16    8.67 
  -4   1   1  421.92    8.61 
  -4   1   1  423.65    8.66 
  -4  -1  -1  422.20    8.65 
   4   1  -1  415.79    8.60 
   4  -1   1  417.45    8.61 
  -4  -1   3   13.81    0.94 
   4   1   3   14.17    0.75 
   4   1   3   11.34    1.09 
   4   1   3   14.74    0.89 
  -4  -1   3   12.33    0.90 
  -4   1  -3   12.69    0.69 
  -4  -1   3   12.23    0.63 
   4  -1   3   13.51    0.92 
  -4  -1  -3   10.48    0.74 
  -4   1   3   13.18    0.86 
   4  -1   3   12.84    0.80 
   4   1  -3   11.70    1.10 
   4  -1   3   12.69    1.12 
  -4   1   3   10.91    0.86 
  -4   1   3   10.99    1.05 
  -4   1   3   11.85    0.70 
  -4  -1   5   16.10    1.17 
   4   1   5   14.98    0.98 
  -4   1  -5   13.35    1.46 
   4  -1  -5   14.48    0.86 
  -4  -1   5   12.80    1.16 
  -4   1  -5   14.61    0.79 
   4   1   5   16.91    1.47 
   4   1   5   13.99    1.13 
   4  -1  -5   15.02    1.43 
  -4   1   5   13.11    1.12 
   4  -1   5   15.52    1.05 
   4   1  -5   14.39    1.41 
   4   1  -5   13.10    0.76 
   4  -1   5   13.34    1.14 
  -4   1   5   13.33    1.06 
  -4  -1  -5   12.37    0.86 
  -4  -1   7    9.00    1.20 
   4  -1  -7   12.13    1.65 
   4   1   7   10.66    1.10 
   4   1   7   10.91    1.32 
  -4   1  -7   11.63    1.65 
  -4  -1   7   10.79    1.21 
  -4  -1  -7   11.79    1.76 
  -4   1   7   13.69    1.35 
   4   1  -7   12.55    1.71 
   4  -1   7   10.94    1.18 
  -4   1   7   12.95    1.25 
   4  -1   7   11.02    1.31 
  -4  -1   9    1.14    0.89 
   4   1   9    1.08    0.94 
  -4  -1   9    2.03    0.92 
  -4   1  -9    5.10    1.51 
   4  -1  -9    4.48    1.37 
   4  -1   9    0.85    0.98 
  -4  -1  -9    2.03    1.12 
  -4   1   9    0.51    0.89 
   4   1  -9    5.80    1.40 
  -4   1   9    0.78    0.81 
  -4  -2   0  149.07    3.15 
   4   2   0  141.70    3.08 
  -4   2   0  153.05    3.26 
   4  -2   0  149.57    3.15 
  -4  -2   0  148.43    3.25 
   4   2   0  142.78    3.11 
   4   2   2  411.22    8.36 
  -4   2  -2  414.44    8.78 
   4   2   2  412.21    8.53 
  -4  -2   2  409.28    8.63 
   4   2   2  406.13    8.78 
  -4  -2   2  401.59    8.66 
  -4   2  -2  405.71    8.43 
  -4  -2   2  411.62    8.43 
  -4   2   2  410.19    8.56 
   4  -2   2  411.89    8.54 
  -4   2   2  411.16    8.54 
   4   2  -2  411.27    8.70 
  -4  -2  -2  412.35    8.56 
  -4   2   2  404.19    8.70 
  -4   2   2  405.70    8.58 
   4  -2   2  404.95    8.63 
   4   2   4   49.58    2.09 
   4   2   4   51.45    1.56 
  -4  -2   4   49.12    1.81 
  -4  -2   4   51.08    1.86 
  -4   2  -4   47.36    1.39 
  -4  -2   4   51.17    1.39 
   4   2   4   51.14    1.75 
  -4   2  -4   49.19    2.07 
  -4   2   4   52.64    1.77 
  -4   2   4   50.39    1.56 
   4  -2   4   50.61    1.70 
  -4  -2  -4   50.16    1.59 
  -4   2   4   50.57    1.73 
   4   2  -4   46.52    2.01 
  -4   2   4   49.95    2.06 
   4  -2   4   51.93    1.87 
   4  -2  -6    2.66    1.10 
  -4  -2   6    2.25    0.74 
   4   2   6    4.07    0.68 
   4   2   6    4.40    0.85 
  -4  -2   6    3.71    0.83 
   4   2   6    4.84    1.13 
   4  -2  -6    4.60    0.64 
  -4   2  -6    2.51    0.91 
  -4   2  -6    4.06    0.52 
   4   2  -6    4.65    0.49 
   4  -2   6    4.22    0.80 
  -4   2   6    3.03    0.79 
   4   2  -6    4.12    1.13 
  -4   2   6    4.51    0.81 
   4  -2   6    2.76    0.79 
  -4  -2  -6    2.55    0.60 
  -4  -2   8    0.69    0.76 
   4   2   8    1.36    0.76 
  -4  -2   8    1.24    0.81 
   4   2   8    1.95    0.93 
   4  -2  -8    1.24    1.05 
  -4   2  -8    2.17    1.10 
  -4   2   8    2.44    0.86 
  -4  -2  -8    2.56    1.23 
   4  -2   8    1.24    0.76 
   4   2  -8    1.62    1.07 
  -4   2   8    0.68    0.74 
   4  -2   8    2.09    0.96 
   4   2  10    1.24    1.03 
  -4  -2  10    0.59    1.00 
  -4  -2  10    0.75    1.03 
  -4   2  10    2.78    1.09 
   4  -2  10    0.70    0.98 
  -4   3  -1   39.24    1.12 
   4   3   1   38.14    1.02 
   4   3   1   38.28    1.18 
  -4   3  -1   38.11    1.18 
  -4  -3   1   39.63    1.16 
   4   3   1   41.08    0.96 
  -4  -3   1   37.97    1.20 
  -4  -3   1   38.31    1.14 
  -4   3   1   38.10    1.06 
  -4  -3  -1   37.88    1.20 
   4  -3   1   42.43    1.21 
  -4   3   1   38.56    1.11 
  -4   3   1   38.92    1.16 
  -4   3   1   39.78    1.21 
   4   3  -1   35.60    1.11 
  -4  -3   3   55.56    1.81 
  -4  -3   3   54.22    1.81 
  -4  -3   3   57.63    1.43 
   4   3   3   54.44    1.46 
   4   3   3   57.16    1.70 
  -4   3  -3   56.66    2.00 
  -4   3  -3   54.19    1.45 
   4   3   3   56.71    2.02 
   4  -3   3   55.55    1.83 
  -4  -3  -3   55.84    1.70 
  -4   3   3   53.27    1.92 
  -4   3   3   56.89    1.69 
   4  -3   3   57.66    1.76 
  -4   3   3   54.02    1.69 
  -4   3   3   56.89    1.67 
   4   3  -3   54.64    1.96 
   4  -3  -5    7.02    0.73 
  -4  -3   5    6.08    0.87 
   4   3   5    5.58    0.78 
  -4   3  -5    6.13    1.08 
   4   3   5    5.20    1.00 
  -4   3  -5    6.02    0.53 
   4   3   5    6.10    0.66 
  -4  -3   5    7.30    0.96 
   4  -3   5    6.12    0.91 
   4  -3   5    6.28    0.82 
  -4  -3  -5    6.16    0.74 
   4   3  -5    6.20    1.07 
  -4   3   5    6.33    0.78 
   4   3  -5    6.06    0.52 
  -4   3   5    5.65    0.79 
  -4   3   5    7.05    1.11 
   4   3   7    7.66    0.88 
   4   3   7    7.36    1.14 
   4  -3  -7    6.85    1.18 
   4  -3  -7    8.27    1.51 
  -4  -3   7    7.58    1.19 
  -4  -3   7    6.26    1.06 
  -4   3  -7    5.36    1.31 
   4  -3   7    6.75    1.16 
  -4   3   7    6.40    0.96 
  -4   3   7    7.37    1.08 
   4   3  -7    9.51    1.50 
   4  -3   7    5.99    1.00 
  -4   3  -9    3.46    1.27 
  -4  -3   9    0.14    0.86 
   4   3   9    0.41    0.85 
  -4  -3   9    0.74    0.86 
   4  -3  -9    4.77    1.36 
  -4   3   9    1.04    0.83 
   4   3  -9    2.06    1.24 
  -4   3   9    1.06    0.78 
  -4  -3  -9    3.81    1.31 
   4  -3   9    0.36    0.91 
   4  -3   9    1.15    0.79 
   4  -4   0  402.03    8.13 
   4   4   0  384.69    8.14 
  -4   4   0  383.76    8.07 
  -4  -4   0  397.20    8.07 
  -4  -4   0  401.31    8.25 
  -4   4   0  412.13    8.26 
  -4  -4   0  394.19    8.13 
   4   4   2   72.19    2.08 
  -4  -4   2   69.51    1.71 
   4   4   2   71.22    1.78 
  -4  -4   2   70.92    1.97 
  -4  -4   2   67.90    2.00 
  -4   4  -2   70.96    1.71 
  -4   4  -2   70.17    2.03 
   4  -4   2   70.22    1.97 
  -4   4   2   69.84    1.85 
  -4  -4  -2   71.35    1.96 
  -4   4   2   70.39    1.92 
   4  -4   2   70.24    1.93 
  -4   4   2   69.03    2.01 
  -4   4   2   72.99    1.80 
   4   4  -2   69.24    1.99 
  -4  -4   4    4.61    0.41 
  -4   4  -4    4.97    0.41 
   4   4   4    4.45    0.88 
   4   4   4    5.58    0.53 
  -4   4  -4    3.82    0.82 
  -4  -4   4    6.08    0.81 
  -4  -4   4    3.83    0.70 
   4   4   4    4.66    0.65 
  -4   4   4    4.64    0.85 
  -4   4   4    4.43    0.65 
   4   4  -4    3.00    0.81 
  -4   4   4    5.27    0.64 
   4  -4   4    5.10    0.78 
  -4  -4  -4    4.94    0.67 
  -4   4   4    5.38    0.65 
   4  -4   4    4.66    0.68 
   4   4   6    9.75    1.08 
  -4  -4   6    7.04    1.04 
  -4   4  -6   10.62    1.49 
   4   4   6   12.23    1.61 
   4   4   6    8.13    0.83 
  -4  -4   6    7.89    1.08 
   4  -4  -6   10.25    0.94 
   4   4  -6    9.09    1.37 
   4  -4   6   11.31    1.17 
  -4   4   6    9.60    1.07 
  -4   4   6    8.38    0.93 
  -4  -4  -6    9.98    0.95 
   4  -4   6    9.57    1.17 
  -4   4   6   10.01    1.45 
  -4  -4   8   -0.57    0.70 
  -4  -4   8    0.73    0.85 
   4  -4  -8    1.65    1.09 
   4   4   8    0.49    0.76 
  -4   4  -8    0.77    1.09 
   4   4  -8    3.56    1.29 
  -4  -4  -8    1.37    1.13 
  -4   4   8    0.78    0.79 
   4  -4   8    1.10    0.72 
  -4   4   8    1.00    0.69 
   4  -4   8   -0.75    0.80 
  -4  -4  10    2.64    1.10 
   4   5   1   34.52    1.10 
  -4  -5   1   32.97    1.15 
  -4   5  -1   39.95    1.18 
  -4   5  -1   34.04    1.05 
  -4  -5   1   32.71    1.07 
   4   5   1   32.66    0.87 
   4  -5  -1   31.95    0.96 
  -4  -5   1   32.14    1.06 
   4   5  -1   32.17    1.09 
  -4  -5  -1   32.74    1.22 
  -4   5   1   34.03    1.18 
  -4   5   1   31.69    1.02 
   4   5   3    7.79    0.47 
   4   5   3    9.80    1.03 
  -4   5  -3    8.31    0.50 
  -4   5  -3    9.45    1.03 
  -4  -5   3    8.52    0.47 
   4   5   3    8.07    0.68 
  -4  -5   3    6.93    0.76 
  -4  -5   3    7.80    0.79 
  -4   5   3    8.74    0.94 
  -4   5   3    7.48    0.71 
  -4  -5  -3    8.77    0.80 
   4  -5   3    8.28    0.77 
   4  -5   3    8.85    0.87 
  -4   5   3    8.53    0.76 
   4   5  -3    8.08    0.92 
  -4   5   3    8.08    0.68 
  -4  -5   5   21.81    1.43 
   4   5   5   20.73    0.99 
  -4  -5   5   22.14    1.42 
  -4   5  -5   21.68    1.61 
   4   5   5   21.22    1.23 
   4  -5  -5   21.62    1.18 
   4   5   5   20.57    1.58 
  -4   5   5   22.15    1.21 
  -4   5   5   21.11    1.60 
  -4   5   5   22.27    1.19 
   4  -5   5   21.94    1.33 
  -4  -5  -5   21.63    1.20 
   4  -5   5   23.64    1.44 
   4   5  -5   19.99    1.57 
  -4  -5   7    0.94    0.76 
   4   5   7    1.12    0.52 
   4   5   7    0.11    0.84 
   4  -5  -7    0.77    0.55 
  -4   5  -7    0.07    0.99 
   4   5   7    0.92    0.70 
  -4  -5   7    1.28    0.77 
   4  -5   7    1.08    0.82 
   4   5  -7    1.72    0.98 
   4  -5   7    1.20    0.74 
  -4  -5  -7    1.37    0.65 
  -4   5   7    0.31    0.63 
  -4   5   7    0.77    0.65 
  -4   5  -9    4.89    1.57 
  -4  -5   9    2.96    1.08 
  -4  -5   9    0.15    0.86 
   4  -5  -9    4.96    1.39 
   4   5   9    1.53    0.88 
   4   5  -9    3.18    1.30 
   4  -5   9    1.55    0.92 
  -4   5   9    1.39    0.92 
   4  -5   9    1.56    1.06 
  -4  -5  -9    4.22    1.36 
  -4  -6   0   56.63    1.60 
  -4  -6   0   51.56    1.36 
  -4   6   0   50.95    1.35 
   4  -6   0   48.69    1.33 
  -4  -6   0   48.51    1.25 
  -4   6   0   52.28    1.49 
   4   6   2    5.63    0.70 
   4   6   2    5.72    0.50 
  -4  -6   2    6.91    0.70 
  -4   6  -2    6.52    0.75 
  -4   6  -2    6.52    0.53 
  -4  -6   2    6.13    0.49 
  -4  -6   2    5.24    0.61 
  -4  -6  -2    7.77    0.75 
   4   6  -2    5.68    0.67 
  -4   6   2    5.85    0.55 
  -4   6   2    5.43    0.66 
   4  -6   2    5.45    0.63 
  -4   6   2    5.40    0.63 
   4  -6   2    6.55    0.67 
  -4   6   2    5.27    0.51 
   4   6   4   13.12    0.66 
  -4  -6   4   13.71    1.13 
   4   6   4   12.63    1.25 
  -4  -6   4   12.40    1.09 
   4   6   4   12.86    0.89 
  -4   6  -4   12.02    1.25 
   4  -6   4   12.87    1.07 
   4  -6   4   13.53    1.08 
  -4   6   4   14.98    1.24 
  -4   6   4   14.15    0.92 
  -4   6   4   12.20    0.87 
  -4   6   4   13.35    0.96 
   4   6  -4   11.83    1.26 
  -4  -6  -4   13.27    1.02 
   4   6   6    0.33    0.71 
   4  -6  -6   -0.26    0.52 
  -4  -6   6    0.55    0.69 
  -4  -6   6   -0.64    0.53 
   4   6   6   -0.43    0.53 
  -4   6  -6   -0.61    0.77 
   4   6   6   -0.01    0.38 
  -4   6   6    0.15    0.53 
   4   6  -6   -0.59    0.85 
  -4  -6  -6    0.29    0.60 
   4  -6   6    0.11    0.62 
  -4   6   6    0.03    0.56 
   4  -6   6    0.42    0.64 
  -4   6   6    1.05    0.82 
  -4  -6   8   -0.78    0.76 
   4   6   8    0.81    0.77 
  -4   6  -8    0.36    1.04 
  -4  -6   8   -0.29    0.78 
   4   6   8    0.29    1.00 
   4  -6  -8    2.80    1.24 
   4  -6   8    0.08    0.81 
   4  -6   8   -0.69    0.69 
  -4   6   8    1.11    0.71 
   4   6  -8    1.24    1.11 
  -4   6   8    0.55    0.78 
  -4  -7   1   11.46    0.69 
   4  -7  -1   11.49    0.57 
   4   7   1   13.50    0.74 
  -4  -7   1   11.07    0.71 
  -4  -7   1   11.35    0.79 
  -4   7  -1   11.49    0.72 
  -4   7  -1   11.00    0.72 
   4  -7   1   11.25    0.77 
  -4   7   1   12.14    0.67 
  -4  -7  -1   10.11    0.84 
   4   7  -1   11.05    0.77 
  -4   7   1   11.31    0.82 
  -4  -7   3    7.92    0.47 
  -4   7  -3    8.65    0.98 
   4   7   3    7.35    0.89 
  -4  -7   3    7.98    0.83 
  -4   7  -3    7.66    0.46 
   4   7   3    7.51    0.61 
  -4  -7   3    6.69    0.76 
  -4   7   3    7.15    0.89 
  -4   7   3    7.55    0.76 
  -4   7   3    7.97    0.64 
   4  -7   3    8.61    0.82 
  -4   7   3    7.63    0.70 
  -4  -7  -3    7.42    0.81 
   4  -7   3   10.19    0.97 
   4   7  -3    7.92    0.95 
  -4   7  -5   13.50    1.43 
   4   7   5   11.65    0.96 
  -4  -7   5   10.19    1.15 
   4   7   5   11.64    1.36 
   4   7   5   11.70    0.73 
  -4  -7   5   12.62    1.24 
   4  -7  -5   12.89    1.02 
  -4   7   5   12.54    0.96 
   4   7  -5   12.88    1.42 
   4  -7   5   13.47    1.22 
  -4   7   5   12.93    0.99 
   4  -7   5   13.19    1.19 
  -4  -7  -5   11.85    1.08 
  -4   7   5   11.75    1.38 
   4   7   7    4.04    1.26 
   4  -7  -7    5.46    0.83 
  -4   7  -7    5.30    1.36 
   4   7   7    5.04    0.92 
  -4  -7   7    3.03    0.93 
  -4  -7   7    3.76    1.00 
  -4   7   7    5.41    1.33 
   4   7  -7    5.05    1.25 
   4  -7   7    4.51    1.06 
   4  -7   7    5.49    1.09 
  -4  -7  -7    3.86    0.85 
  -4   7   7    4.40    0.83 
  -4   7   7    4.13    0.89 
  -4  -7   9    2.32    1.11 
  -4  -7   9    2.33    1.10 
   4   7   9    3.82    1.05 
  -4   7  -9    5.23    1.50 
   4  -7  -9    7.67    1.68 
  -4  -7  -9    5.03    1.63 
  -4   7   9    3.73    1.06 
   4  -7   9    2.34    1.20 
   4   7  -9    4.75    1.39 
   4  -7   9    3.29    1.08 
  -4  -8   0    3.66    0.43 
  -4   8   0    2.77    0.52 
  -4  -8   0    3.94    0.55 
  -4  -8   0    3.59    0.33 
   4   8   0    3.96    0.52 
  -4   8   0    3.98    0.49 
   4  -8   0    3.31    0.41 
  -4  -8   2   33.86    1.38 
  -4   8  -2   33.11    1.05 
  -4   8  -2   33.47    1.32 
  -4  -8   2   34.49    1.31 
   4   8   2   33.18    0.94 
  -4  -8   2   32.42    1.07 
   4   8   2   31.68    1.34 
  -4   8   2   33.22    1.01 
   4  -8   2   33.09    1.36 
  -4  -8  -2   33.69    1.37 
  -4   8   2   34.98    1.33 
   4   8  -2   33.44    1.33 
   4  -8   2   32.87    1.31 
  -4   8   2   32.22    1.38 
   4  -8  -4   53.76    1.91 
   4   8   4   52.64    1.68 
  -4  -8   4   55.17    2.04 
   4   8   4   50.09    2.17 
  -4   8  -4   54.13    2.14 
  -4  -8   4   54.99    2.10 
   4  -8   4   52.78    2.00 
  -4   8   4   56.71    2.22 
  -4  -8  -4   54.71    1.95 
  -4   8   4   54.67    1.70 
  -4   8   4   55.43    1.73 
   4   8  -4   51.35    2.08 
   4  -8   4   51.77    2.03 
  -4  -8   6    5.00    0.98 
  -4  -8   6    5.43    1.03 
   4   8   6    8.68    0.72 
   4  -8  -6    7.82    0.96 
   4   8   6    9.65    1.45 
  -4   8  -6    8.64    1.37 
   4   8   6    7.58    0.93 
  -4  -8  -6    7.93    1.01 
  -4   8   6    7.68    0.86 
  -4   8   6    7.86    1.28 
   4  -8   6    8.04    1.14 
   4   8  -6    7.16    1.25 
  -4   8   6    8.48    0.96 
   4  -8   6    6.59    1.12 
  -4  -8   8    4.05    1.09 
  -4  -8   8    3.28    1.09 
   4   8   8    4.83    1.37 
   4   8   8    3.04    0.87 
  -4   8  -8    5.67    1.46 
  -4   8   8    5.08    1.61 
   4   8  -8    5.69    1.35 
   4  -8   8    3.22    1.17 
   4  -8   8    5.13    1.19 
  -4   8   8    2.86    0.88 
   4   9   1    0.74    0.40 
  -4   9  -1    0.65    0.43 
  -4  -9   1    0.38    0.40 
  -4  -9   1    0.98    0.37 
  -4   9  -1    1.23    0.42 
   4  -9  -1    1.19    0.32 
  -4  -9   1    0.38    0.42 
  -4   9   1    0.93    0.53 
  -4  -9  -1    0.11    0.49 
   4  -9   1    1.32    0.44 
   4   9  -1    1.82    0.50 
  -4   9   1    1.39    0.40 
  -4  -9  -1    1.00    0.26 
  -4  -9   3   30.45    1.38 
   4   9   3   28.94    1.00 
  -4   9  -3   29.76    0.90 
  -4  -9   3   28.71    0.93 
  -4  -9   3   31.54    1.46 
   4   9   3   29.41    1.47 
  -4   9  -3   28.93    1.46 
  -4   9   3   30.81    1.19 
  -4   9   3   31.73    1.49 
  -4   9   3   30.60    1.04 
   4  -9   3   30.24    1.42 
   4  -9   3   28.88    1.39 
  -4  -9  -3   32.01    1.46 
  -4   9   3   29.03    1.37 
   4   9  -3   29.00    1.42 
   4   9   5    2.19    0.57 
   4   9   5    2.76    0.88 
  -4   9  -5    2.93    0.88 
  -4  -9   5    3.79    0.83 
   4  -9  -5    1.97    0.66 
  -4  -9   5    2.65    0.75 
  -4   9   5    2.87    0.60 
   4  -9   5    2.76    0.79 
  -4  -9  -5    1.76    0.71 
   4   9  -5    2.36    0.89 
  -4   9   5    2.53    0.59 
  -4   9   5    2.67    0.87 
   4  -9   5    1.87    0.73 
   4   9   7    2.39    1.07 
  -4  -9   7    1.69    0.89 
   4  -9  -7    2.75    0.77 
  -4  -9   7    0.72    0.82 
   4   9   7    3.23    0.78 
  -4   9  -7    2.37    1.07 
   4  -9   7    2.52    0.91 
   4   9  -7    2.99    1.21 
  -4   9   7    1.52    1.04 
  -4  -9  -7    3.26    0.87 
   4  -9   7    2.24    0.98 
  -4   9   7    2.21    0.68 
  -4   9   7    1.90    0.74 
  -4  -9   9    0.58    0.87 
  -4  -9   9    0.86    0.96 
  -4   9  -9    1.71    1.22 
   4   9   9    1.83    0.88 
   4  -9  -9    3.44    1.57 
  -4   9   9    0.46    0.78 
   4  -9   9   -0.65    0.94 
   4  -9   9    0.91    0.90 
   4   9  -9    0.80    1.10 
   4 -10   0    0.53    0.36 
  -4  10   0    1.32    0.51 
   4  10   0    1.62    0.49 
  -4 -10   0    0.96    0.50 
  -4 -10   0    1.09    0.28 
  -4  10   0    0.66    0.41 
  -4 -10   0    1.42    0.39 
  -4 -10   2   15.34    0.81 
  -4 -10   2   14.95    0.95 
  -4 -10   2   16.49    1.06 
  -4  10  -2   15.32    1.03 
   4 -10  -2   15.56    0.70 
   4  10   2   15.73    1.01 
  -4  10  -2   17.55    0.80 
  -4 -10  -2   15.73    1.09 
  -4  10   2   15.82    0.99 
  -4  10   2   16.47    1.09 
   4 -10   2   15.69    1.01 
   4  10  -2   17.78    1.08 
   4 -10   2   15.76    1.08 
  -4  10  -4    5.24    0.99 
   4  10   4    5.97    0.96 
   4  10   4    4.39    0.53 
  -4 -10   4    4.97    0.80 
  -4 -10   4    4.91    0.85 
   4 -10  -4    5.44    0.81 
   4  10  -4    4.62    0.87 
  -4 -10  -4    4.25    0.78 
  -4  10   4    7.12    1.06 
   4 -10   4    6.45    0.85 
   4 -10   4    4.92    0.80 
  -4  10   4    5.10    0.60 
  -4  10   4    6.70    0.66 
  -4 -10   6   15.30    1.56 
   4  10   6   10.28    1.02 
  -4  10  -6    9.68    1.44 
  -4 -10   6   11.27    1.29 
   4  10   6   12.50    1.55 
   4 -10  -6   11.24    1.15 
   4  10  -6   13.34    1.57 
   4 -10   6   15.94    1.51 
  -4 -10  -6   13.67    1.31 
   4 -10   6   10.38    1.34 
  -4  10   6   12.26    1.05 
  -4  10   6   12.73    1.61 
  -4  10   6   14.54    1.09 
  -4 -10   8    5.47    1.29 
  -4 -10   8    7.71    1.36 
   4  10   8    9.07    1.16 
   4  10   8    9.39    1.78 
  -4  10  -8    9.86    1.78 
   4 -10   8    9.79    1.53 
   4 -10   8   11.28    1.63 
   4  10  -8    7.51    1.51 
  -4  10   8    7.32    1.11 
  -4  10   8   13.21    2.11 
  -4 -11   1   15.20    0.91 
   4 -11  -1   13.43    0.67 
  -4  11  -1   15.22    0.97 
  -4 -11   1   13.86    0.78 
  -4 -11   1   13.40    0.92 
  -4  11  -1   13.72    0.89 
   4  11   1   14.44    0.90 
   4  11  -1   13.97    1.01 
  -4  11   1   14.34    0.85 
  -4 -11  -1   13.52    1.02 
  -4 -11  -1   13.48    0.65 
   4 -11   1   15.02    0.90 
  -4  11   1   12.81    1.00 
  -4  11  -3   51.63    1.88 
   4  11   3   52.99    2.01 
  -4 -11   3   52.87    1.89 
  -4  11  -3   53.30    1.40 
  -4 -11   3   52.43    1.44 
   4  11   3   50.68    1.35 
  -4 -11   3   49.72    1.95 
   4  11  -3   51.46    1.93 
  -4  11   3   53.44    1.46 
   4 -11   3   47.48    1.91 
   4 -11   3   50.55    1.90 
  -4  11   3   48.98    1.91 
  -4  11   3   52.12    1.96 
  -4 -11  -3   54.38    1.99 
  -4 -11   5    2.68    0.84 
   4  11   5    2.21    0.52 
  -4 -11   5    3.43    0.80 
  -4  11  -5    2.66    0.97 
   4  11   5    1.94    0.82 
   4 -11  -5    0.58    0.65 
  -4  11   5    2.85    0.58 
  -4 -11  -5    2.82    0.79 
  -4  11   5    3.46    0.94 
   4  11  -5    2.05    0.89 
  -4  11   5    2.70    0.61 
   4 -11   5    3.65    0.82 
   4 -11   5    2.99    0.75 
  -4 -11   7    8.15    1.25 
  -4  11  -7    7.19    1.42 
  -4 -11   7    9.17    1.31 
   4  11   7    9.16    1.04 
   4  11   7    7.36    1.49 
   4 -11  -7    9.02    1.14 
   4  11  -7    9.97    1.61 
   4 -11   7    9.53    1.42 
  -4  11   7   11.34    1.11 
  -4  11   7    8.66    1.60 
  -4  11   7   10.08    1.10 
  -4 -11  -7    9.96    1.25 
   4 -11   7    9.99    1.44 
   4  11   9    5.93    1.86 
  -4  11  -9    7.58    1.80 
  -4 -11   9    5.64    1.36 
  -4 -11   9    3.73    1.21 
   4 -11   9    7.68    1.62 
   4  11  -9    5.50    1.53 
   4 -11   9    5.65    1.41 
   4 -12   0   12.00    0.75 
   4  12   0   12.69    0.96 
  -4 -12   0   11.70    0.97 
  -4  12   0   11.48    0.88 
  -4 -12   0   12.40    0.80 
  -4 -12   0   11.69    0.57 
  -4  12   0   11.70    0.94 
  -4  12  -2   53.25    1.58 
  -4 -12   2   51.45    1.87 
  -4 -12   2   53.66    1.75 
   4 -12  -2   53.03    1.39 
  -4  12  -2   54.36    1.81 
  -4 -12   2   50.62    1.58 
   4  12   2   52.72    1.81 
   4 -12   2   53.74    1.81 
  -4 -12  -2   51.07    1.94 
  -4  12   2   52.99    1.76 
   4 -12   2   54.92    1.92 
  -4  12   2   54.00    1.93 
   4  12  -2   48.91    1.85 
  -4  12  -4   24.09    1.50 
   4  12   4   22.98    1.53 
  -4 -12   4   21.73    1.38 
  -4 -12   4   23.80    1.50 
   4  12   4   22.68    0.92 
   4 -12  -4   22.73    1.40 
  -4 -12  -4   22.46    1.41 
  -4  12   4   23.15    1.52 
  -4  12   4   24.43    1.01 
   4 -12   4   22.53    1.48 
   4 -12   4   23.41    1.43 
   4  12  -4   24.42    1.56 
  -4  12  -6   27.94    2.01 
   4  12   6   28.96    2.09 
   4 -12  -6   28.98    1.67 
   4  12   6   30.29    1.39 
  -4 -12   6   29.80    1.86 
  -4 -12   6   29.42    1.91 
  -4  12   6   30.28    1.45 
   4 -12   6   28.38    1.90 
  -4  12   6   29.51    2.08 
  -4  12   6   29.84    1.38 
   4  12  -6   28.48    2.00 
   4 -12   6   31.49    1.92 
  -4 -12  -6   32.21    1.82 
  -4  12  -8    7.36    1.53 
   4  12   8    5.74    1.44 
  -4 -12   8    5.04    1.29 
   4 -12  -8    2.93    0.94 
  -4 -12   8    4.33    1.18 
  -4  12   8    5.86    1.59 
  -4 -12  -8    5.57    1.14 
   4 -12   8    5.00    1.30 
  -4  12   8    6.01    0.99 
   4  12  -8    6.37    1.44 
   4 -12   8    6.07    1.40 
  -4  13  -1  124.26    3.18 
  -4  13  -1  123.09    3.09 
  -4 -13   1  117.97    3.08 
   4  13   1  119.84    3.11 
  -4 -13   1  122.56    2.93 
   4 -13  -1  121.57    2.76 
  -4 -13   1  119.04    3.15 
  -4 -13  -1  121.58    3.27 
   4  13  -1  118.42    3.22 
  -4  13   1  118.69    3.25 
  -4 -13  -1  122.34    2.80 
  -4  13   1  122.64    3.04 
   4 -13   1  119.94    3.02 
   4  13   3   42.09    1.80 
  -4  13  -3   41.94    1.75 
  -4 -13   3   42.34    1.33 
  -4 -13   3   41.31    1.69 
   4 -13  -3   41.18    1.25 
  -4 -13   3   40.16    1.77 
   4 -13  -3   39.75    1.76 
   4 -13   3   39.99    1.71 
  -4 -13  -3   40.39    1.78 
   4  13  -3   42.13    1.77 
  -4  13   3   44.41    1.80 
   4 -13   3   42.82    1.80 
   4 -13  -5    9.58    1.14 
   4  13   5   11.27    0.77 
  -4 -13   5   11.61    1.25 
  -4 -13   5   11.03    1.29 
  -4  13  -5   12.27    1.44 
   4  13   5   11.69    1.46 
   4 -13   5    9.57    1.21 
  -4  13   5   10.45    1.33 
   4 -13   5    9.89    1.16 
  -4 -13  -5   10.87    1.22 
  -4  13   5   10.72    0.85 
   4  13  -5   10.09    1.29 
   4 -13  -7    4.39    1.02 
  -4  13  -7    5.54    1.37 
   4  13   7    4.44    1.28 
   4  13   7    6.10    0.91 
  -4 -13   7    7.08    1.31 
  -4 -13   7    2.49    0.98 
  -4 -13  -7    5.59    1.12 
   4  13  -7    4.69    1.22 
   4 -13   7    4.78    1.13 
   4 -13   7    3.56    1.08 
  -4  13   7    5.41    0.85 
  -4  13   7    4.87    1.41 
  -4 -13   9    3.81    1.31 
   4  13   9    2.90    1.44 
  -4 -13   9    3.77    1.24 
  -4  13  -9    8.25    1.74 
   4 -13   9    3.17    1.33 
  -4  13   9    4.37    1.77 
   4 -13   9    4.76    1.34 
   4  13  -9    3.90    1.36 
  -4 -14   0    0.04    0.52 
  -4 -14   0    1.22    0.44 
  -4 -14   0    1.11    0.30 
  -4  14   0   -0.11    0.51 
   4  14   0    1.38    0.55 
  -4  14   0    1.13    0.53 
   4 -14   0    0.62    0.40 
   4  14   2   18.27    1.11 
   4 -14  -2   17.58    0.73 
  -4  14  -2   17.71    1.20 
  -4 -14   2   17.12    1.17 
  -4 -14   2   17.65    0.93 
  -4 -14   2   17.99    1.02 
  -4  14  -2   15.08    0.95 
   4 -14   2   17.07    1.08 
   4  14  -2   16.11    1.23 
  -4  14   2   17.70    1.24 
  -4 -14  -2   18.07    1.23 
   4 -14   2   15.17    1.19 
  -4  14   2   17.09    1.07 
  -4  14  -4    1.85    0.83 
  -4 -14   4    1.78    0.64 
  -4 -14   4    2.77    0.36 
   4  14   4    2.00    0.79 
  -4 -14   4    1.68    0.70 
   4 -14  -4    2.20    0.72 
  -4 -14  -4    2.82    0.76 
   4  14  -4    3.69    0.97 
  -4  14   4    1.97    0.78 
  -4  14   4    1.83    0.44 
   4 -14   4    2.66    0.77 
   4 -14   4    2.17    0.68 
   4  14   6    5.28    0.66 
  -4 -14   6    4.09    1.01 
   4 -14  -6    3.96    0.91 
  -4  14  -6    3.06    1.05 
   4  14   6    4.91    1.25 
  -4 -14   6    4.83    1.02 
  -4  14   6    4.82    1.21 
  -4 -14  -6    2.96    0.95 
  -4  14   6    5.93    0.76 
   4 -14   6    5.26    1.10 
   4 -14   6    4.87    1.07 
   4  14  -6    6.11    1.28 
  -4  14  -8   30.54    2.49 
   4  14   8   24.74    2.42 
   4 -14  -8   23.12    1.85 
  -4 -14   8   24.08    2.23 
  -4 -14   8   26.63    2.13 
   4 -14   8   30.15    2.33 
   4  14  -8   25.43    2.21 
   4 -14   8   27.00    2.31 
  -4 -14  -8   25.10    1.90 
  -4  14   8   27.75    2.57 
  -4 -15   1   48.95    1.50 
  -4 -15   1   49.08    1.75 
   4  15   1   48.56    1.74 
  -4  15  -1   49.89    1.74 
  -4 -15   1   47.35    1.70 
   4 -15  -1   49.24    1.37 
  -4  15  -1   49.33    1.83 
   4  15  -1   49.38    1.91 
  -4  15   1   49.61    1.91 
  -4 -15  -1   50.48    1.89 
  -4 -15  -1   48.18    1.45 
   4 -15   1   46.42    1.79 
  -4  15   1   47.55    1.67 
   4 -15   1   48.07    1.62 
   4 -15  -3    1.86    0.70 
   4  15   3    3.15    0.75 
  -4  15  -3    2.46    0.74 
  -4 -15   3    3.11    0.51 
  -4 -15   3    2.32    0.68 
   4 -15  -3    3.35    0.42 
  -4 -15   3    1.67    0.60 
   4  15  -3    2.94    0.83 
   4 -15   3    3.29    0.71 
  -4 -15  -3    3.43    0.82 
  -4  15   3    3.90    0.83 
   4 -15   3    3.52    0.78 
   4 -15   3    3.49    0.47 
  -4  15  -5    0.90    0.88 
   4  15   5    0.73    0.84 
  -4 -15   5    0.22    0.66 
   4  15   5    0.80    0.33 
  -4 -15   5    0.46    0.71 
   4 -15  -5    1.34    0.76 
  -4 -15  -5   -0.74    0.69 
   4 -15   5    0.90    0.68 
  -4  15   5    0.69    0.82 
   4 -15   5    1.76    0.79 
  -4  15   5    0.35    0.43 
   4  15  -5   -0.95    0.81 
  -4 -15   7    8.63    1.41 
   4 -15  -7    9.86    1.29 
  -4  15  -7   10.96    1.62 
  -4 -15   7   10.14    1.56 
   4  15   7   12.71    1.81 
   4 -15   7   11.49    1.59 
   4  15  -7    8.40    1.44 
   4 -15   7    9.45    1.49 
  -4  15   7    9.62    1.70 
  -4 -15  -7   10.26    1.34 
  -4 -15   9    8.55    1.58 
  -4 -15   9    8.01    1.67 
  -4  15  -9   13.78    2.08 
   4  15   9   13.15    2.37 
  -4  15   9   13.44    2.46 
   4  15  -9    9.23    1.70 
   4 -15   9   10.71    1.88 
   4 -15   9   11.04    1.85 
   4  16   0   22.51    1.35 
   4 -16   0   21.34    0.98 
  -4 -16   0   20.88    1.08 
  -4 -16   0   21.77    1.29 
  -4  16   0   22.66    1.27 
  -4  16   0   19.93    1.31 
  -4 -16   0   22.42    0.79 
  -4 -16   2    8.56    0.94 
   4 -16  -2    8.22    0.99 
  -4  16  -2    9.21    1.09 
  -4 -16   2    8.54    0.83 
   4 -16  -2    8.49    0.58 
   4  16   2    8.00    0.90 
  -4 -16   2    8.00    0.78 
  -4  16   2    7.86    0.89 
   4 -16   2    9.01    0.79 
  -4 -16  -2    8.24    0.99 
   4  16  -2    9.08    1.12 
   4 -16   2    8.07    0.85 
   4 -16   2    9.08    0.97 
  -4 -16  -2    7.86    0.54 
   4 -16  -4    1.26    0.39 
   4  16   4    0.53    0.62 
  -4 -16   4    0.93    0.71 
  -4  16  -4    0.65    0.86 
  -4 -16   4    0.87    0.35 
   4 -16  -4    0.24    0.69 
  -4 -16   4    0.25    0.58 
   4  16  -4    0.66    0.84 
  -4  16   4    1.10    0.74 
   4 -16   4    1.39    0.69 
   4 -16   4    0.79    0.62 
  -4 -16  -4    1.14    0.77 
   4 -16   4    1.17    0.31 
   4 -16  -6    6.52    1.07 
  -4 -16   6    4.04    1.02 
   4  16   6    6.17    1.37 
  -4  16  -6    4.99    1.21 
  -4 -16   6    5.49    1.17 
  -4 -16  -6    3.89    1.01 
  -4  16   6    6.47    1.36 
  -4  16   6    6.14    0.75 
   4  16  -6    4.44    1.22 
   4 -16   6    3.65    1.12 
   4 -16   6    5.55    1.16 
  -4 -16   8   11.52    1.67 
   4 -16  -8    9.81    1.45 
   4  16   8    7.72    1.75 
  -4 -16   8    5.60    1.25 
  -4  16  -8    8.24    1.66 
   4 -16   8    9.76    1.63 
   4  16  -8   10.77    1.76 
  -4 -16  -8   10.96    1.57 
  -4  16   8   11.72    2.22 
   4 -16   8   12.62    1.91 
   4 -17  -1    0.65    0.60 
  -4 -17   1   -0.73    0.41 
  -4  17  -1    0.31    0.65 
   4  17   1    0.62    0.49 
  -4 -17   1    0.10    0.47 
  -4 -17   1    0.12    0.34 
   4 -17  -1    0.01    0.35 
  -4 -17  -1    0.16    0.33 
   4 -17   1   -0.19    0.45 
  -4 -17  -1    0.40    0.60 
  -4  17   1    0.43    0.51 
   4 -17   1    0.00    0.55 
   4  17  -1    0.01    0.63 
   4 -17   1    0.10    0.41 
   4 -17  -3   12.36    1.24 
  -4  17  -3   14.36    1.40 
   4  17   3   11.75    1.18 
  -4 -17   3   10.81    0.85 
   4 -17  -3   13.13    0.66 
  -4 -17   3   11.60    1.18 
  -4 -17   3   14.47    1.13 
   4  17  -3   12.57    1.38 
  -4  17   3   11.87    1.17 
   4 -17   3   11.33    0.79 
   4 -17   3   13.17    1.13 
  -4 -17  -3   12.85    1.28 
   4 -17   3   12.71    1.26 
  -4 -17   5    6.32    1.05 
  -4  17  -5    6.82    1.18 
  -4 -17   5    6.15    1.09 
   4  17   5    7.98    1.35 
   4 -17  -5    6.33    1.09 
   4 -17   5    5.91    1.07 
   4 -17   5    6.93    1.08 
  -4  17   5    8.21    1.31 
  -4 -17  -5    6.92    1.16 
   4  17  -5    6.49    1.24 
  -4  17  -7    6.67    1.38 
   4  17   7    9.80    1.83 
  -4 -17   7    5.38    1.17 
   4 -17  -7    3.77    1.01 
  -4 -17   7    7.00    1.37 
   4  17  -7    6.15    1.41 
  -4 -17  -7    9.30    1.40 
  -4  17   7    6.57    1.51 
   4 -17   7    7.31    1.37 
   4 -17   7    7.01    1.34 
   4  17   9    3.32    1.65 
  -4 -17   9    3.34    1.27 
  -4 -17   9    1.51    1.18 
  -4  17  -9    1.39    1.45 
   4  17  -9    2.21    1.35 
   4 -17   9    2.04    1.24 
  -4  17   9    2.12    1.57 
   4 -17   9    4.22    1.49 
   4 -18   0    3.71    0.54 
  -4  18   0    4.09    0.79 
   4 -18   0    3.29    0.72 
  -4 -18   0    3.11    0.38 
  -4 -18   0    3.76    0.76 
   4  18   0    3.55    0.77 
  -4 -18   0    2.68    0.55 
   4 -18  -2   12.74    1.19 
  -4 -18   2   10.00    0.91 
   4  18   2   12.20    1.07 
  -4  18  -2   13.00    1.29 
  -4 -18   2   11.89    0.93 
  -4 -18   2   10.86    1.07 
  -4 -18  -2   10.50    0.65 
   4 -18   2   10.53    0.91 
  -4  18   2   12.20    1.05 
   4  18  -2   12.44    1.32 
   4 -18   2   10.85    0.99 
   4 -18   2   11.75    1.17 
  -4 -18  -2   12.62    1.25 
  -4 -18   4    2.35    0.76 
   4 -18  -4    2.52    0.43 
  -4 -18   4    1.93    0.47 
  -4  18  -4    1.11    0.85 
   4  18   4    1.77    0.83 
   4 -18  -4    1.76    0.80 
  -4 -18   4    1.79    0.77 
   4 -18   4    0.60    0.72 
   4  18  -4    1.03    0.87 
  -4  18   4    1.31    0.74 
   4 -18   4    1.85    0.41 
   4 -18   4    2.45    0.75 
  -4 -18  -4    1.17    0.82 
  -4 -18   6    3.08    1.01 
   4  18   6    3.74    1.18 
   4 -18  -6    4.31    1.02 
  -4  18  -6    3.70    1.18 
  -4 -18   6    2.89    0.96 
   4  18  -6    7.32    1.44 
   4 -18   6    4.44    1.04 
  -4  18   6    2.77    1.11 
   4 -18   6    3.15    1.07 
  -4 -18  -6    4.28    1.09 
  -4  18  -8    1.42    1.32 
   4  18   8    0.79    1.23 
  -4 -18   8    1.06    1.00 
  -4 -18   8    1.68    1.06 
   4 -18  -8   -0.23    0.88 
   4 -18   8    1.89    1.16 
   4 -18   8    1.63    1.11 
  -4 -18  -8    2.18    1.15 
   4  18  -8    1.49    1.22 
  -4  18   8    1.25    1.27 
   4  19   1    2.39    0.69 
   4 -19  -1    2.05    0.44 
  -4 -19   1    2.91    0.70 
   4 -19  -1    3.90    0.78 
  -4  19  -1    3.83    0.88 
  -4 -19   1    3.45    0.52 
  -4 -19   1    3.24    0.65 
  -4 -19  -1    1.92    0.74 
  -4  19   1    2.40    0.68 
   4 -19   1    2.63    0.64 
   4 -19   1    4.19    0.63 
  -4 -19  -1    3.25    0.52 
   4 -19   1    3.09    0.75 
   4  19  -1    4.22    0.94 
  -4 -19   3    1.48    0.71 
  -4  19  -3    2.43    0.87 
   4  19   3    0.63    0.61 
  -4 -19   3    2.45    0.56 
  -4 -19   3    0.14    0.54 
   4 -19  -3    0.53    0.71 
  -4  19   3    1.32    0.67 
   4  19  -3    0.66    0.78 
   4 -19   3    0.14    0.67 
   4 -19   3    1.40    0.61 
   4 -19   3    1.02    0.49 
  -4 -19  -3    0.39    0.71 
   4 -19  -5    1.15    0.83 
   4  19   5    0.88    0.86 
  -4 -19   5    0.36    0.67 
  -4 -19   5    0.95    0.78 
  -4  19  -5    0.29    1.00 
   4 -19   5    0.81    0.84 
   4  19  -5    0.69    0.94 
  -4 -19  -5    0.81    0.83 
  -4  19   5    0.02    0.79 
   4 -19   5    1.61    0.78 
   4 -19  -7    8.98    1.38 
   4  19   7    9.29    1.82 
  -4  19  -7    6.90    1.54 
  -4 -19   7    8.33    1.45 
  -4 -19   7   10.06    1.63 
   4  19  -7   10.81    1.74 
   4 -19   7    6.63    1.39 
  -4  19   7   12.13    1.92 
   4 -19   7    8.91    1.52 
  -4 -19  -7   10.19    1.55 
  -4  20   0   13.71    1.28 
   4 -20   0   11.94    1.12 
   4  20   0   12.54    1.36 
  -4 -20   0   10.56    0.59 
   4 -20   0    9.08    0.79 
  -4 -20   0   10.67    1.09 
  -4 -20   0   10.40    0.94 
  -4 -20   2   11.83    1.02 
  -4 -20   2   14.17    1.29 
  -4 -20   2   13.35    1.02 
   4 -20  -2   16.08    1.37 
   4  20   2   13.15    1.18 
  -4  20  -2   15.65    1.47 
  -4 -20  -2   12.79    1.33 
   4  20  -2   14.42    1.51 
   4 -20   2   14.88    1.04 
   4 -20   2   14.73    1.39 
  -4  20   2   16.88    1.23 
  -4 -20  -2   15.32    0.80 
   4 -20   2   15.58    1.13 
  -4 -20   4   16.50    0.99 
  -4  20  -4   16.88    1.69 
  -4 -20   4   18.57    1.59 
   4  20   4   18.18    1.55 
   4 -20  -4   16.79    1.52 
  -4 -20   4   16.25    1.38 
  -4  20   4   18.89    1.59 
   4  20  -4   18.95    1.81 
  -4 -20  -4   16.38    1.55 
   4 -20   4   18.13    1.45 
   4 -20   4   17.32    1.60 
   4 -20   4   17.27    0.93 
  -4 -20   6    2.28    1.03 
  -4  20  -6    2.11    1.15 
  -4 -20   6    1.12    0.85 
   4 -20  -6    1.16    0.92 
   4  20   6    1.57    0.98 
   4 -20   6    1.91    1.02 
  -4 -20  -6    1.40    0.98 
   4  20  -6    2.64    1.10 
  -4  20   6    3.12    1.17 
   4 -20   6    0.73    0.84 
   4  20   8    0.44    1.23 
   4 -20  -8    1.36    0.98 
  -4 -20   8    0.98    0.95 
  -4  20  -8    2.23    1.39 
  -4 -20   8    1.68    1.13 
   4  20  -8    2.97    1.34 
  -4 -20  -8    1.38    1.09 
   4 -20   8    0.99    1.13 
  -4  20   8   -0.82    1.15 
   4 -20   8    0.67    1.13 
  -4 -21   1    6.45    0.86 
   4 -21  -1    6.92    0.60 
  -4 -21   1    6.51    0.66 
   4 -21  -1    6.66    1.01 
  -4 -21   1    7.79    0.96 
  -4  21  -1    8.14    1.19 
   4  21   1    7.06    0.99 
  -4 -21  -1    7.36    0.73 
  -4  21   1    7.43    0.97 
   4 -21   1    8.42    1.05 
   4  21  -1    6.29    1.10 
   4 -21   1    7.13    0.93 
  -4 -21  -1    5.90    1.01 
   4 -21   1    6.06    0.75 
   4 -21  -3   22.49    1.63 
  -4 -21   3   23.43    1.25 
  -4 -21   3   21.90    1.65 
  -4  21  -3   22.74    1.75 
   4  21   3   21.48    1.55 
  -4 -21   3   23.80    1.41 
   4 -21   3   21.20    1.42 
   4 -21   3   22.18    1.64 
   4  21  -3   23.69    1.85 
   4 -21   3   22.37    1.17 
  -4 -21  -3   22.20    1.67 
  -4  21   3   20.95    1.51 
  -4  21  -5    0.75    1.06 
  -4 -21   5    1.80    0.80 
   4 -21  -5    0.56    0.77 
  -4 -21   5    0.04    0.79 
   4  21   5    0.84    0.84 
  -4 -21  -5   -0.34    0.78 
   4 -21   5    0.07    0.85 
  -4  21   5    1.10    0.91 
   4 -21   5    0.86    0.76 
   4  21  -5   -0.11    1.07 
   4 -21  -7    1.44    0.93 
  -4 -21   7   -0.05    0.95 
   4  21   7    0.21    1.09 
  -4 -21   7   -1.20    0.82 
  -4  21  -7    0.34    1.22 
  -4  21   7   -0.53    1.09 
   4 -21   7   -0.17    0.97 
  -4 -21  -7   -0.11    0.96 
   4 -21   7   -0.40    0.93 
   4  21  -7    0.47    1.17 
   4 -22   0   21.80    1.07 
   4  22   0   22.06    1.64 
  -4 -22   0   22.24    1.49 
   4 -22   0   21.33    1.49 
  -4  22   0   23.25    1.59 
   4 -22   0   22.68    1.49 
  -4 -22   0   22.17    1.26 
  -4 -22   0   20.64    0.84 
  -4  22  -2    5.23    1.10 
   4 -22  -2    7.39    1.09 
  -4 -22   2    6.21    0.89 
   4  22   2    7.09    1.00 
  -4 -22   2    7.06    0.84 
  -4 -22   2    6.41    0.98 
  -4 -22  -2    6.87    0.64 
   4 -22   2    5.85    0.82 
  -4  22   2    5.90    0.95 
  -4 -22  -2    6.32    1.08 
   4 -22   2    7.16    0.89 
   4 -22   2    5.07    1.02 
   4  22  -2    6.42    1.14 
  -4 -22   4   29.11    1.71 
  -4 -22   4   29.50    1.94 
   4  22   4   27.49    1.87 
  -4  22  -4   31.94    2.10 
   4 -22  -4   29.35    1.89 
  -4 -22  -4   29.79    1.95 
   4 -22   4   27.34    1.93 
   4  22  -4   30.03    2.10 
   4 -22   4   27.50    1.73 
  -4  22   4   27.15    1.85 
  -4 -22   6   -0.16    0.83 
  -4  22  -6    1.37    1.13 
  -4 -22   6    1.02    0.80 
   4 -22  -6    0.60    0.86 
   4  22   6    1.85    1.09 
   4 -22   6    0.98    0.84 
  -4  22   6   -0.17    0.89 
   4 -22   6    0.27    0.97 
   4  22  -6   -0.52    0.99 
  -4 -22  -6    0.17    0.90 
   4  22   8    0.51    1.21 
  -4 -22   8    1.17    0.98 
  -4  22  -8    1.10    1.46 
   4 -22  -8   -0.23    0.94 
  -4 -22   8   -0.22    1.08 
  -4 -22  -8   -0.30    1.11 
   4  22  -8    1.10    1.25 
   4 -22   8    0.90    1.15 
   4 -22   8    0.65    1.09 
  -4  22   8    1.23    1.40 
  -4  23  -1    8.31    1.26 
   4 -23  -1    7.69    0.68 
  -4 -23   1    8.94    0.76 
  -4 -23   1    7.12    1.03 
   4  23   1    8.32    1.10 
  -4 -23   1    8.10    0.96 
   4 -23  -1    7.76    1.11 
  -4 -23  -1    8.76    0.82 
   4 -23   1    8.39    1.07 
  -4 -23  -1    9.78    1.23 
   4 -23   1    8.84    1.14 
   4 -23   1    9.26    0.91 
  -4  23   1    7.99    1.04 
   4  23  -1   10.51    1.38 
  -4 -23   3    2.77    0.72 
   4 -23  -3    2.87    0.95 
  -4  23  -3    0.73    0.95 
  -4 -23   3    1.81    0.81 
  -4 -23   3    3.27    0.71 
   4  23   3    1.74    0.82 
  -4 -23  -3    2.61    0.97 
  -4  23   3    2.15    0.83 
   4 -23   3    2.15    0.88 
   4 -23   3    3.48    0.80 
   4 -23   3    2.92    0.66 
   4  23  -3    2.04    1.05 
  -4 -23   5    0.42    0.87 
  -4 -23   5    0.55    0.70 
  -4  23  -5    0.19    1.01 
   4  23   5   -0.61    0.70 
   4 -23  -5    0.66    0.85 
   4 -23   5    0.76    0.76 
  -4  23   5    0.89    0.91 
   4 -23   5    0.49    0.87 
   4  23  -5    0.61    1.05 
  -4 -23  -5    0.19    0.89 
  -4 -23   7   -0.11    0.98 
  -4 -23   7    0.54    0.92 
   4 -23  -7    0.35    0.92 
  -4  23  -7    0.18    1.22 
   4  23   7   -0.65    1.06 
  -4  23   7    0.34    1.14 
   4 -23   7    1.54    1.16 
   4 -23   7    0.78    1.03 
  -4 -23  -7    1.49    1.07 
   4  23  -7   -0.31    1.16 
   4 -24   0   66.57    2.06 
  -4 -24   0   65.52    2.31 
   4 -24   0   71.30    2.65 
  -4 -24   0   71.87    2.70 
   4 -24   0   68.51    2.53 
  -4 -24   0   68.52    1.81 
  -4  24   0   70.41    2.71 
   4  24   0   69.24    2.73 
  -4 -24   2    7.15    0.84 
   4 -24  -2    5.33    1.08 
   4  24   2    7.94    1.17 
  -4 -24   2    6.00    0.92 
  -4 -24   2    6.39    1.02 
  -4  24  -2    7.12    1.26 
   4 -24   2    7.80    0.97 
  -4 -24  -2    6.46    0.66 
  -4 -24  -2    4.54    1.04 
  -4  24   2    7.13    1.05 
   4 -24   2    6.36    0.90 
   4 -24   2    6.92    1.11 
   4  24  -2    8.48    1.40 
  -4 -24   4    1.20    0.66 
  -4  24  -4    2.90    1.12 
   4 -24  -4    0.65    0.76 
   4  24   4    2.19    0.88 
  -4 -24   4    2.16    0.86 
   4  24  -4    0.48    1.04 
   4 -24   4    0.97    0.69 
   4 -24   4    0.59    0.81 
  -4  24   4    1.61    0.85 
  -4 -24  -4    0.82    0.88 
  -4 -24   6    2.39    0.99 
  -4 -24   6    3.88    1.21 
   4 -24  -6    5.44    1.22 
   4  24   6    4.24    1.29 
  -4  24  -6    1.74    1.42 
  -4 -24  -6    2.53    1.08 
   4 -24   6    2.17    1.11 
   4  24  -6    3.79    1.34 
   4 -24   6    4.02    1.15 
  -4  24   6    5.53    1.46 
   4  24   8    1.29    1.34 
  -4 -24   8    0.76    1.08 
  -4 -24   8    2.23    1.10 
   4 -24  -8    1.12    1.08 
  -4 -24  -8    0.81    1.19 
  -4  24   8    1.10    1.34 
   4 -24   8    2.99    1.36 
   4 -24   8    2.28    1.30 
  -4 -25   1   15.72    1.43 
  -4 -25   1   13.69    0.90 
   4 -25  -1   14.54    1.48 
   4 -25  -1   15.48    1.32 
   4 -25  -1   10.93    1.10 
  -4  25  -1   17.01    1.68 
  -4 -25   1   13.81    1.28 
   4  25   1   13.90    1.38 
  -4  25   1   14.89    1.38 
   4 -25   1   13.53    1.04 
  -4 -25  -1   15.08    1.52 
  -4 -25  -1   13.82    1.04 
   4  25  -1   14.81    1.64 
   4 -25   1   15.69    1.37 
   4 -25   1   15.35    1.45 
  -4 -25   3    5.42    1.03 
   4 -25  -3    3.34    1.02 
  -4  25  -3    4.39    1.22 
   4  25   3    5.80    1.19 
  -4 -25   3    5.53    0.86 
  -4 -25   3    4.64    0.83 
  -4  25   3    5.34    1.12 
   4  25  -3    4.54    1.29 
   4 -25   3    4.61    0.88 
  -4 -25  -3    4.24    1.12 
   4 -25   3    4.49    1.05 
   4 -25   3    5.23    0.80 
  -4 -25   5    1.23    0.81 
  -4 -25   5   -0.46    0.84 
   4 -25  -5    0.51    0.86 
  -4  25  -5    0.60    1.17 
   4  25   5    1.01    0.95 
   4 -25   5    0.93    0.82 
   4  25  -5   -0.61    1.14 
   4 -25   5    0.91    0.90 
  -4 -25  -5    0.60    0.91 
  -4  25   5    0.57    0.90 
  -4  25  -7    1.26    1.39 
  -4 -25   7    2.27    1.00 
   4 -25  -7    0.50    1.02 
   4  25   7   -0.05    1.13 
  -4 -25   7    1.11    1.12 
  -4 -25  -7    1.50    1.06 
  -4  25   7    1.03    1.37 
   4  25  -7    1.38    1.35 
   4 -25   7    1.79    1.12 
   4 -25   7   -0.84    0.93 
  -4  26   0   14.67    1.64 
   4  26   0   14.70    1.60 
   4 -26   0   14.44    0.95 
   4 -26   0   15.05    1.49 
   4 -26   0   15.19    1.39 
  -4 -26   0   15.12    1.22 
  -4 -26   0   11.93    1.35 
  -4  26  -2   10.03    1.54 
  -4 -26   2   10.73    1.19 
  -4 -26   2   11.97    1.02 
   4 -26  -2   10.10    1.32 
   4  26   2   11.30    1.35 
  -4 -26   2   11.28    1.28 
   4 -26   2   13.03    1.26 
  -4  26   2   10.75    1.30 
  -4 -26  -2   13.23    1.49 
   4 -26   2   11.71    1.39 
   4 -26   2   10.67    1.09 
   4  26  -2   11.17    1.58 
  -4 -26  -2   11.27    0.90 
  -4 -26   4    1.14    0.81 
   4  26   4    0.15    0.88 
   4 -26  -4    0.27    0.89 
  -4  26  -4   -1.03    1.01 
  -4 -26   4    0.03    0.57 
   4 -26   4   -0.27    0.81 
  -4 -26  -4   -0.14    0.87 
  -4  26   4    0.23    0.79 
   4  26  -4    0.11    1.04 
   4 -26   4    0.14    0.65 
  -4 -26   6    6.55    1.30 
   4  26   6    7.39    1.61 
  -4 -26   6    9.06    1.61 
  -4  26  -6    5.96    1.75 
   4 -26  -6    5.88    1.32 
   4 -26   6    9.01    1.64 
   4  26  -6    5.37    1.64 
  -4  26   6    8.35    1.80 
  -4 -26  -6    8.25    1.55 
   4 -26   6    6.58    1.34 
  -4  27  -1   14.63    1.68 
  -4 -27   1   13.53    0.92 
   4 -27  -1   14.21    1.39 
  -4 -27   1   13.77    1.36 
   4  27   1   13.36    1.49 
  -4 -27   1   17.28    1.53 
   4 -27  -1   16.67    1.61 
  -4  27   1   14.46    1.44 
   4  27  -1   12.84    1.61 
  -4 -27  -1   14.86    1.57 
  -4 -27  -1   16.51    1.16 
   4 -27   1   16.74    1.44 
   4 -27   1   15.40    1.11 
   4 -27   1   14.08    1.42 
  -4 -27   3    2.05    0.70 
   4 -27  -3    2.56    0.95 
  -4  27  -3    2.07    1.15 
  -4 -27   3    3.01    0.78 
  -4 -27   3    1.69    0.82 
   4  27   3    1.80    0.88 
  -4 -27  -3    2.39    1.01 
   4  27  -3    4.31    1.29 
   4 -27   3    1.72    0.91 
   4 -27   3    2.66    0.80 
   4 -27   3    2.96    0.72 
  -4  27   3    2.58    0.96 
  -4 -27   5    4.54    1.27 
  -4 -27   5    4.58    1.02 
   4  27   5    3.37    1.21 
   4 -27  -5    4.87    1.25 
  -4  27  -5    3.27    1.45 
   4 -27   5    4.03    1.04 
  -4 -27  -5    3.44    1.16 
   4 -27   5    4.95    1.30 
  -4  27   5    3.40    1.23 
   4  27  -5    3.70    1.32 
  -4 -27   7    2.12    1.22 
  -4 -27   7    1.13    0.93 
  -4  27  -7    1.30    1.57 
   4 -27  -7    1.18    1.20 
   4  27   7    3.63    1.55 
  -4 -27  -7    2.46    1.28 
  -4  27   7    0.21    1.35 
   4 -27   7    1.69    1.16 
   4  27  -7    0.40    1.39 
   4 -27   7    2.15    1.27 
  -4 -28   0    1.07    0.85 
  -4  28   0    1.82    1.02 
  -4 -28   0    1.70    0.67 
   4 -28   0    1.34    0.80 
   4  28   0    4.13    1.16 
   4 -28   0    1.41    0.78 
   4 -28  -2    8.77    1.08 
   4 -28  -2    6.59    1.15 
   4  28   2   10.49    1.47 
  -4  28  -2    9.38    1.50 
  -4 -28   2    9.27    0.98 
  -4 -28   2    8.98    1.21 
  -4 -28   2    8.38    1.16 
   4  28  -2    5.78    1.37 
   4 -28   2    9.02    1.27 
  -4  28   2    9.36    1.35 
   4 -28   2    9.19    1.12 
  -4 -28  -2    9.11    1.39 
   4 -28   2    8.26    1.01 
  -4  28  -4    0.01    1.21 
  -4 -28   4    1.32    0.75 
   4  28   4    1.00    0.95 
   4 -28  -4   -0.19    0.84 
  -4 -28   4    0.94    0.82 
   4  28  -4    0.63    1.11 
  -4  28   4    0.65    0.92 
  -4 -28  -4    1.05    0.96 
   4 -28   4    0.41    0.68 
   4 -28   4    1.76    0.96 
  -4  28  -6    1.24    1.42 
  -4 -28   6    1.54    1.16 
  -4 -28   6    2.15    0.93 
   4 -28  -6    1.85    1.04 
   4  28   6    2.90    1.33 
   4  28  -6    1.66    1.38 
   4 -28   6    2.01    1.05 
  -4  28   6    2.22    1.38 
   4 -28   6    3.11    1.32 
  -4 -28  -6    1.54    1.07 
  -4 -29   1    2.11    0.93 
  -4 -29   1    3.20    0.82 
   4  29   1    2.72    0.96 
   4 -29  -1    2.78    0.97 
   4 -29  -1    0.76    0.72 
  -4  29  -1    1.92    1.09 
  -4  29   1    3.31    0.99 
  -4 -29  -1    2.45    0.99 
   4 -29   1    2.01    0.89 
   4 -29   1    1.28    0.58 
  -4 -29  -1    2.56    0.66 
   4  29  -1    2.21    1.05 
   4 -29   1    2.16    0.92 
  -4 -29   3    3.68    0.85 
  -4  29  -3    1.00    1.13 
   4  29   3    2.07    0.99 
  -4 -29   3    2.14    0.87 
   4 -29  -3    1.72    1.00 
  -4 -29   3    2.45    0.72 
  -4  29   3    1.22    0.99 
   4 -29   3    2.79    1.04 
   4 -29   3    1.65    0.71 
  -4 -29  -3    1.96    1.07 
   4 -29   3    1.53    0.74 
   4  29  -3    2.77    1.28 
   4 -29  -5    0.15    0.90 
   4  29   5    0.57    0.97 
  -4 -29   5    0.74    0.99 
  -4 -29   5    0.40    0.73 
  -4  29  -5   -1.15    1.27 
   4  29  -5    0.13    1.19 
  -4 -29  -5    0.46    1.07 
   4 -29   5    1.18    1.09 
  -4  29   5   -0.44    1.01 
   4 -29   5    0.37    0.77 
  -4 -30   0   15.53    1.66 
   4 -30   0   13.68    1.53 
  -4  30   0   13.81    1.73 
   4 -30   0   12.98    1.40 
   4  30   0   13.26    1.72 
  -4 -30   0   13.13    1.29 
  -4 -30   2    2.68    0.88 
  -4  30  -2    2.93    1.22 
   4 -30  -2    1.16    0.78 
  -4 -30   2    3.49    0.82 
  -4 -30   2    1.53    0.78 
   4  30   2    2.41    1.02 
   4 -30  -2    1.64    1.01 
   4 -30   2    2.56    0.81 
   4  30  -2    1.78    1.17 
  -4  30   2    1.64    0.91 
   4 -30   2    1.67    0.68 
  -4 -30  -2    3.46    1.08 
   4 -30   2    0.95    0.85 
  -4 -30   4    8.83    1.41 
   4 -30  -4    5.51    1.33 
  -4 -30   4    7.85    1.13 
  -4  30  -4    6.97    1.66 
   4  30   4    7.27    1.54 
  -4 -30  -4    9.67    1.65 
   4 -30   4    5.83    1.31 
   4  30  -4    6.64    1.59 
   4 -30   4    6.69    1.16 
  -4  30   4    8.00    1.53 
   4 -30  -6   -0.30    0.89 
  -4 -30   6   -0.89    0.93 
  -4 -30   6    0.11    0.80 
   4  30   6    0.41    1.10 
  -4  30  -6   -1.48    1.41 
   4  30  -6   -0.06    1.34 
   4 -30   6    1.07    0.96 
  -4  30   6    1.86    1.38 
   4 -30   6    0.51    1.07 
  -4 -30  -6    0.05    1.08 
   4  31   1    0.26    0.87 
   4 -31  -1    0.68    0.75 
  -4 -31   1    1.47    0.96 
  -4  31  -1    1.03    1.15 
  -4 -31   1    0.88    0.68 
   4 -31  -1    1.77    0.94 
   4  31  -1    0.97    1.08 
   4 -31   1    0.34    0.79 
  -4  31   1    0.23    0.85 
  -4 -31  -1    0.63    0.58 
  -4 -31  -1    2.59    1.09 
   4 -31   1    2.10    0.89 
   4  31   3    5.94    1.30 
  -4  31  -3    3.91    1.49 
   4 -31  -3    6.28    1.33 
  -4 -31   3    3.75    0.96 
  -4 -31   3    5.40    0.91 
  -4 -31   3    4.88    1.12 
   4 -31   3    6.31    1.02 
  -4 -31  -3    4.69    1.33 
   4 -31   3    7.30    1.27 
   4 -31   3    4.36    1.20 
  -4  31   3    7.48    1.47 
   4  31  -3    5.14    1.57 
  -4 -31   5    1.60    0.86 
   4 -31  -5    4.00    1.31 
  -4 -31   5    1.29    1.03 
   4  31   5    3.92    1.39 
  -4  31  -5    2.85    1.57 
   4 -31   5    1.94    1.17 
   4  31  -5    1.62    1.42 
  -4 -31  -5    2.43    1.25 
  -4  31   5    1.26    1.28 
   4 -31   5    1.96    0.95 
  -4  32   0    0.29    1.02 
  -4 -32   0    0.67    0.92 
   4 -32   0    1.95    0.92 
   4 -32   0    0.76    0.79 
   4  32   0    1.01    1.03 
  -4 -32   0    1.10    0.65 
  -4 -32   2    0.16    0.84 
  -4 -32   2    0.56    0.75 
  -4  32  -2    0.47    1.14 
   4 -32  -2    0.23    0.71 
   4  32   2    0.98    0.99 
   4 -32  -2    0.59    1.01 
  -4  32   2    1.78    1.08 
  -4 -32  -2    0.79    1.01 
   4 -32   2    2.74    0.90 
   4 -32   2    0.91    0.86 
   4  32  -2    0.88    1.13 
   4  32   4    9.66    1.75 
  -4  32  -4    6.57    1.73 
  -4 -32   4    6.88    1.36 
   4 -32  -4    9.88    1.63 
  -4 -32   4    8.98    1.21 
  -4 -32  -4    7.34    1.53 
   4 -32   4    9.05    1.31 
   4  32  -4    7.87    1.77 
  -4  32   4    8.67    1.64 
   4 -32   4    9.93    1.68 
   4 -32  -6   -0.02    1.09 
   4  32   6    0.44    1.23 
  -4 -32   6    0.40    0.74 
  -4 -32   6   -0.37    1.04 
  -4  32   6    0.01    1.26 
  -4 -32  -6   -1.01    1.01 
   4 -32   6   -0.23    0.94 
   4 -32   6   -0.26    1.07 
   4 -33  -1    4.08    1.19 
  -4 -33   1    2.60    0.86 
   4 -33  -1    3.14    0.92 
  -4  33  -1    3.90    1.43 
   4  33   1    2.40    1.07 
  -4 -33   1    5.87    1.25 
  -4  33   1    3.28    1.13 
  -4 -33  -1    3.95    1.26 
   4 -33   1    1.89    0.95 
   4 -33   1    5.16    1.12 
   4  33  -1    6.04    1.54 
   4  33   3    0.89    1.08 
  -4  33  -3   -1.32    1.33 
   4 -33  -3   -0.49    0.96 
  -4 -33   3   -0.67    0.68 
  -4 -33  -3    0.38    1.11 
   4 -33   3    0.43    0.70 
   4  33  -3   -0.69    1.23 
  -4  33   3    1.53    1.11 
   4 -33   3    0.08    0.95 
   4  33   5    1.57    1.16 
  -4 -33   5    1.24    1.05 
   4 -33  -5    1.77    1.14 
  -4 -33   5    0.06    0.70 
  -4  33  -5   -0.68    1.48 
  -4  33   5    0.18    1.18 
  -4 -33  -5    0.57    1.07 
   4 -33   5   -0.14    0.78 
   4 -33   5    1.35    1.20 
   4  33  -5   -0.20    1.34 
  -4 -34   0    3.18    0.90 
  -4 -34   0    4.66    1.30 
  -4  34   0    3.60    1.35 
   4  34   0    2.66    1.27 
   4 -34   0    3.73    1.02 
   4 -34   0    2.35    1.09 
  -4  34  -2    3.83    1.52 
  -4 -34   2    3.31    1.10 
   4 -34  -2    1.72    1.12 
  -4 -34   2    3.50    0.98 
   4  34   2    2.47    1.17 
  -4 -34  -2    4.45    1.39 
   4 -34   2    4.92    1.14 
   4  34  -2    4.52    1.56 
   4 -34   2    2.29    1.07 
  -4  34   2    2.90    1.24 
  -4  34  -4   13.74    2.40 
  -4 -34   4    9.42    1.54 
   4  34   4   12.99    2.10 
   4 -34  -4   10.11    1.74 
   4 -34   4   13.04    1.87 
  -4 -34  -4   12.28    1.89 
   4 -34   4   10.76    1.43 
  -4  34   4    9.13    1.77 
   4  34  -4    8.43    1.88 
   4 -35  -1    1.13    0.82 
  -4 -35   1    4.79    1.22 
   4  35   1    2.54    1.18 
  -4 -35   1    3.27    0.96 
   4 -35  -1    2.00    1.12 
  -4  35  -1    1.89    1.45 
   4  35  -1    1.44    1.22 
   4 -35   1    3.06    1.08 
  -4 -35  -1    0.71    1.12 
   4 -35   1    2.85    1.06 
  -4  35   1    2.76    1.32 
   4 -35  -3    0.75    1.03 
  -4 -35   3    0.57    0.85 
   4  35   3    1.45    1.24 
  -4  35  -3   -0.13    1.48 
  -4  35   3   -0.30    1.17 
   4  35  -3   -1.27    1.27 
  -4 -35  -3    0.57    1.12 
   4 -35   3    0.68    0.95 
   4  36   0    0.34    1.09 
  -4 -36   0    1.49    1.10 
  -4  36   0   -0.27    1.12 
   4 -36   0   -0.20    0.85 
   4 -36   0    0.75    0.86 
   4  36   2    0.76    1.19 
  -4  36  -2    0.66    1.49 
  -4 -36   2    0.63    0.76 
  -4 -36   2    0.17    0.91 
   4 -36  -2    3.02    1.27 
  -4 -36  -2    0.04    1.08 
  -4  36   2   -1.46    1.10 
   4 -36   2    1.44    0.97 
   4 -36   2   -0.02    0.88 
   4  36  -2    0.79    1.33 
   4 -36  -4    1.56    1.21 
   4  36   4    2.37    1.32 
  -4  36  -4    3.24    1.81 
  -4 -36   4    1.56    1.03 
  -4  36   4    2.71    1.54 
   4 -36   4    2.56    1.21 
   4  36  -4    3.04    1.74 
  -4 -36  -4    2.55    1.32 
  -4  37  -1    0.70    1.43 
  -4 -37   1    1.80    1.15 
   4  37   1    1.27    1.27 
   4 -37  -1    3.07    1.21 
  -4 -37   1    1.39    0.81 
   4 -37   1    1.94    1.10 
  -4 -37  -1   -0.26    1.11 
   4  37  -1    2.32    1.39 
  -4  37   1    1.80    1.22 
   4 -37   1    0.98    0.95 
  -4 -37   3   -0.28    0.79 
   4  37   3   -1.13    1.14 
   4 -37  -3    1.82    1.27 
  -4  37  -3   -0.17    1.58 
   4  37  -3   -0.14    1.46 
   4 -37   3    0.77    0.99 
  -4  37   3   -1.09    1.12 
  -4 -37  -3   -0.20    1.15 
   4  38   0    9.97    1.90 
   4 -38   0    5.08    1.19 
  -4  38   0   10.02    1.89 
  -4 -38   0   11.08    1.77 
   4 -38   0    8.57    1.61 
   4  38   2    0.47    1.21 
  -4 -38   2    3.37    1.02 
  -4 -38   2    4.89    1.28 
  -4  38  -2    2.15    1.69 
   4 -38  -2    1.82    1.26 
   4 -38   2    2.47    1.10 
  -4  38   2    1.77    1.41 
  -4 -38  -2    3.75    1.37 
   4  38  -2    1.51    1.50 
   4 -38   2    3.50    1.27 
   4 -39  -1    6.44    1.55 
  -4 -39   1    5.03    1.43 
  -4 -39   1    6.85    1.60 
  -4  39  -1    6.98    1.90 
   4  39   1    4.32    1.52 
   4  39  -1    6.95    1.82 
  -4 -39  -1    9.15    1.77 
   4 -39   1    8.71    1.58 
   4 -39   1    6.26    1.28 
  -4  39   1    7.87    1.88 
   4 -40   0   -1.22    0.82 
   5   0   0   -0.08    0.22 
  -5   0   0    0.58    0.36 
  -5   0   0    0.26    0.27 
   5   0  -2    0.28    0.50 
   5   0   2    0.08    0.37 
  -5   0  -2   -0.28    0.36 
  -5   0   2    0.58    0.36 
   5   0   2   -0.10    0.31 
  -5   0   2   -0.42    0.34 
  -5   0   2   -0.72    0.38 
   5   0   2   -0.44    0.47 
  -5   0   4    0.29    0.49 
  -5   0   4    0.44    0.45 
   5   0   4   -0.05    0.39 
   5   0   4   -0.25    0.60 
  -5   0   4   -0.54    0.30 
   5   0  -4    0.08    0.62 
   5   0   4   -0.28    0.43 
  -5   0  -4    0.01    0.39 
  -5   0  -6   -0.83    0.70 
  -5   0  -6   -0.66    0.43 
   5   0  -6    0.82    0.85 
   5   0   6    0.31    0.60 
  -5   0   6   -1.12    0.52 
   5   0   6    0.62    0.54 
  -5   0   6   -0.39    0.58 
   5   0  -6    0.32    0.41 
  -5   0   8   -0.91    0.66 
  -5   0  -8    0.56    1.06 
   5   0   8    0.67    0.68 
  -5   0   8   -0.42    0.72 
   5   0  -8    1.44    1.10 
   5   0   8    0.85    0.85 
  -5   0  10    2.63    1.12 
   5   0  10    1.78    1.08 
   5   1   1   72.00    1.85 
  -5  -1   1   72.63    1.81 
  -5  -1   1   71.71    1.89 
  -5   1  -1   75.19    1.88 
  -5  -1   1   73.00    1.87 
   5   1   1   76.65    1.79 
  -5   1   1   72.45    1.79 
   5  -1   1   79.43    1.85 
  -5  -1  -1   71.89    1.88 
   5  -1   1   74.73    1.85 
   5   1  -1   72.08    1.77 
  -5   1   1   77.22    1.92 
  -5   1   1   73.42    1.87 
  -5   1   1   71.30    1.76 
   5   1   3    2.65    0.70 
  -5   1  -3    3.07    0.45 
   5   1   3    2.96    0.44 
  -5  -1   3    1.85    0.52 
   5   1   3    3.53    0.55 
  -5  -1   3    3.63    0.43 
  -5  -1   3    2.27    0.52 
  -5   1   3    3.41    0.46 
   5  -1   3    2.09    0.64 
   5   1  -3    2.40    0.69 
  -5   1   3    2.80    0.68 
   5  -1   3    3.11    0.49 
  -5   1   3    2.08    0.51 
   5  -1   3    2.89    0.56 
  -5  -1  -3    4.11    0.53 
  -5   1   3    3.43    0.54 
  -5  -1   5   15.60    1.19 
   5   1   5   14.58    1.43 
   5   1   5   16.30    1.00 
  -5  -1   5   15.22    1.20 
   5   1   5   15.21    1.15 
  -5   1  -5   14.62    1.45 
   5  -1  -5   15.77    1.46 
  -5   1  -5   14.16    0.82 
   5  -1   5   16.64    1.07 
   5  -1   5   12.42    1.14 
  -5   1   5   15.56    1.14 
  -5  -1  -5   13.08    0.93 
  -5   1   5   14.64    1.14 
   5   1  -5   13.14    1.39 
   5   1   7    0.65    0.74 
  -5  -1   7    1.49    0.74 
   5   1   7    1.24    0.63 
  -5   1  -7    2.62    1.10 
  -5  -1   7    2.09    0.83 
   5  -1  -7    2.80    1.13 
   5   1  -7    0.96    0.97 
   5  -1   7    1.86    0.71 
  -5   1   7    1.42    0.73 
  -5  -1  -7    1.05    1.01 
   5  -1   7    2.57    0.84 
  -5   1   7    0.73    0.69 
   5  -1  -9    8.38    1.68 
  -5  -1   9    4.22    1.12 
   5   1   9    6.28    1.31 
  -5   1  -9    5.42    1.51 
  -5  -1   9    4.26    1.16 
   5  -1   9    4.85    1.28 
  -5   1   9    8.54    1.33 
  -5  -1  -9    9.49    1.73 
  -5   1   9    3.04    1.04 
   5   1  -9    9.19    1.68 
   5   2   0   59.43    1.45 
   5   2   0   60.42    1.39 
  -5   2   0   63.17    1.63 
   5  -2   0   59.34    1.48 
  -5  -2   0   59.15    1.49 
  -5  -2   0   60.19    1.61 
   5   2   2   32.91    0.95 
  -5   2  -2   33.14    1.08 
   5   2   2   31.88    1.33 
  -5   2  -2   31.51    1.31 
  -5  -2   2   30.90    1.18 
  -5  -2   2   33.51    1.07 
  -5  -2   2   31.36    1.24 
   5   2   2   34.12    1.12 
  -5   2   2   30.92    1.24 
  -5   2   2   32.18    1.12 
  -5   2   2   32.62    1.19 
   5  -2   2   31.18    1.19 
   5   2  -2   34.41    1.30 
  -5   2   2   34.00    1.16 
  -5  -2  -2   32.95    1.17 
  -5  -2   4    3.54    0.43 
  -5   2  -4    3.42    0.46 
   5   2   4    3.20    0.49 
   5   2   4    3.93    0.62 
  -5   2  -4    2.80    0.80 
  -5  -2   4    2.11    0.60 
   5   2   4    2.93    0.77 
  -5  -2   4    3.44    0.66 
  -5   2   4    3.57    0.64 
   5  -2   4    3.96    0.70 
  -5   2   4    4.16    0.80 
  -5   2   4    3.33    0.62 
   5  -2   4    3.20    0.56 
   5   2  -4    4.04    0.86 
  -5  -2  -4    4.50    0.62 
  -5   2   4    3.94    0.52 
   5   2   6   13.68    1.02 
  -5  -2   6   11.49    1.19 
   5   2   6   14.95    1.26 
  -5   2  -6   12.89    0.76 
   5  -2  -6   12.66    0.95 
   5  -2  -6   14.04    1.63 
   5   2   6   13.88    1.54 
  -5  -2   6   13.61    1.30 
  -5   2  -6   13.25    1.64 
   5   2  -6   12.58    0.75 
  -5  -2  -6   12.14    0.98 
  -5   2   6   12.96    1.17 
  -5   2   6   14.72    1.27 
   5  -2   6   14.37    1.34 
   5  -2   6   12.87    1.16 
   5   2  -6   13.10    1.54 
  -5  -2   8    3.92    1.05 
  -5  -2   8    5.88    1.13 
   5  -2  -8    5.68    1.49 
  -5   2  -8    5.04    1.38 
   5   2   8    4.67    1.11 
   5   2  -8    5.15    1.38 
   5  -2   8    5.54    1.21 
  -5   2   8    3.96    1.02 
  -5   2   8    4.29    0.97 
  -5  -2  -8    6.43    1.57 
   5  -2   8    4.99    1.00 
  -5  -2  10    2.30    1.05 
  -5   3  -1    3.16    0.52 
   5   3   1    4.12    0.47 
  -5  -3   1    3.61    0.45 
   5   3   1    5.28    0.49 
  -5  -3   1    3.25    0.47 
  -5  -3   1    3.26    0.43 
  -5   3  -1    4.13    0.49 
  -5  -3  -1    2.05    0.56 
   5   3  -1    3.49    0.44 
  -5   3   1    3.10    0.49 
  -5   3   1    3.16    0.36 
  -5   3   1    3.12    0.43 
  -5   3   1    3.75    0.42 
   5   3   3   29.90    0.97 
  -5  -3   3   28.81    1.32 
  -5  -3   3   30.14    1.30 
   5   3   3   30.89    1.18 
  -5   3  -3   30.84    1.02 
  -5   3  -3   29.39    1.46 
   5   3   3   30.74    1.50 
  -5  -3   3   28.08    0.97 
   5  -3   3   30.71    1.23 
   5  -3   3   31.74    1.32 
  -5   3   3   29.82    1.22 
   5   3  -3   28.15    1.43 
  -5   3   3   29.25    1.41 
  -5   3   3   30.32    1.19 
  -5   3   3   31.86    1.18 
  -5  -3  -3   29.34    1.20 
   5   3   5   21.37    1.04 
   5   3   5   21.54    1.25 
  -5   3  -5   19.17    0.84 
   5   3   5   19.54    1.56 
  -5  -3   5   18.65    1.32 
  -5   3  -5   19.54    1.55 
  -5  -3   5   22.52    1.41 
  -5   3   5   21.51    1.27 
  -5  -3  -5   19.37    1.13 
   5  -3   5   20.43    1.25 
  -5   3   5   22.86    1.58 
  -5   3   5   19.10    1.21 
   5  -3   5   19.24    1.33 
   5   3  -5   19.13    1.53 
   5   3   7    0.12    0.52 
   5  -3  -7    0.66    0.85 
   5  -3  -7   -0.65    0.86 
  -5  -3   7   -0.72    0.63 
   5   3   7    0.43    0.67 
  -5  -3   7    0.58    0.72 
  -5   3  -7    1.06    0.95 
  -5   3   7    0.89    0.65 
  -5   3   7   -0.26    0.65 
   5  -3   7   -0.57    0.67 
   5   3  -7   -0.15    0.86 
   5  -3   7    0.78    0.71 
  -5  -3   9    1.64    0.97 
  -5   3  -9    1.25    1.17 
  -5  -3   9   -0.38    0.78 
   5   3   9    0.03    0.83 
  -5  -3  -9    1.83    1.11 
   5  -3   9    1.70    1.04 
   5   3  -9    1.95    1.13 
  -5   3   9    1.07    0.79 
   5  -3   9    0.22    0.89 
  -5   3   9   -0.24    0.80 
  -5  -4   0   46.53    1.27 
  -5  -4   0   48.57    1.42 
   5  -4   0   48.50    1.27 
  -5   4   0   49.05    1.41 
  -5   4   0   45.52    1.14 
   5   4   0   45.38    1.28 
  -5  -4   0   47.73    1.19 
  -5  -4   2  125.65    3.07 
  -5  -4   2  122.64    2.98 
  -5  -4   2  121.89    2.80 
   5   4   2  121.05    2.80 
  -5   4  -2  121.18    3.04 
   5   4   2  121.46    3.09 
  -5   4  -2  123.10    2.79 
  -5   4   2  121.58    2.92 
  -5   4   2  118.84    3.01 
   5  -4   2  119.26    2.98 
   5   4  -2  121.87    2.99 
  -5  -4  -2  121.17    2.97 
  -5   4   2  122.14    2.83 
  -5   4   2  121.69    2.99 
  -5  -4   4   56.93    2.04 
  -5   4  -4   58.53    1.54 
  -5  -4   4   61.85    2.13 
   5   4   4   57.24    2.28 
  -5  -4   4   58.30    1.52 
   5   4   4   57.79    1.88 
   5   4   4   58.98    1.62 
  -5   4  -4   57.76    2.24 
  -5   4   4   57.53    1.84 
   5   4  -4   55.98    2.18 
   5  -4   4   62.11    2.12 
  -5   4   4   60.60    1.91 
  -5  -4  -4   55.97    1.87 
  -5   4   4   56.75    2.22 
   5  -4   4   60.82    1.97 
  -5   4   4   56.98    1.89 
  -5  -4   6    2.34    0.79 
   5   4   6    4.28    0.83 
   5   4   6    4.23    0.62 
   5  -4  -6    3.15    0.65 
  -5   4  -6    3.26    1.02 
  -5  -4   6    3.95    0.90 
   5   4   6    3.48    1.05 
  -5   4   6    4.05    0.79 
  -5   4   6    3.98    1.04 
   5  -4   6    3.46    0.78 
  -5  -4  -6    3.28    0.70 
   5  -4   6    3.73    0.88 
   5   4  -6    4.73    1.10 
  -5   4   6    3.02    0.73 
  -5   4  -8    2.72    1.25 
  -5  -4   8    1.90    0.89 
   5   4   8    3.63    1.00 
   5  -4  -8    5.30    1.39 
  -5  -4   8    3.05    0.97 
   5  -4   8    4.65    1.02 
  -5  -4  -8    3.30    1.26 
  -5   4   8    2.50    0.85 
   5  -4   8    2.56    1.04 
  -5   4   8    2.19    0.90 
   5   4  -8    3.45    1.24 
  -5   5  -1    6.22    0.54 
  -5  -5   1    5.83    0.58 
   5   5   1    6.17    0.56 
  -5   5  -1    5.23    0.51 
  -5  -5   1    4.66    0.50 
   5  -5  -1    4.40    0.41 
  -5  -5   1    5.12    0.49 
   5   5   1    4.80    0.41 
  -5  -5  -1    4.84    0.35 
   5  -5   1    4.68    0.52 
  -5  -5  -1    4.40    0.58 
  -5   5   1    5.72    0.61 
   5   5  -1    4.98    0.49 
  -5   5   1    5.50    0.52 
  -5  -5   3    1.75    0.33 
  -5  -5   3    0.90    0.48 
   5   5   3    0.95    0.58 
   5   5   3    1.14    0.26 
  -5  -5   3    1.23    0.52 
   5   5   3    2.00    0.44 
  -5   5  -3    2.58    0.70 
  -5   5  -3    1.79    0.36 
  -5   5   3    1.28    0.59 
  -5   5   3    0.93    0.45 
   5  -5   3    1.54    0.53 
  -5  -5  -3    1.59    0.55 
   5   5  -3    1.67    0.65 
   5  -5   3    1.54    0.51 
  -5   5   3    1.03    0.45 
  -5   5   3    1.66    0.45 
  -5   5  -5   14.27    1.43 
   5   5   5   16.06    0.84 
  -5  -5   5   13.81    1.24 
   5   5   5   15.17    1.44 
   5  -5  -5   13.88    1.03 
  -5  -5   5   12.62    1.20 
   5   5   5   12.26    1.03 
   5   5  -5   14.97    1.44 
  -5  -5  -5   14.74    1.08 
  -5   5   5   15.55    1.10 
  -5   5   5   15.64    1.08 
   5  -5   5   14.72    1.24 
   5  -5   5   12.95    1.16 
  -5   5   5   14.64    1.43 
   5   5   7    0.46    0.88 
  -5  -5   7   -0.12    0.67 
  -5   5  -7    0.33    0.92 
  -5  -5   7   -1.40    0.62 
   5  -5  -7   -0.28    0.50 
   5   5   7    0.25    0.49 
   5   5   7   -0.17    0.63 
  -5   5   7   -0.03    0.58 
   5  -5   7    0.11    0.64 
   5   5  -7    0.04    0.98 
  -5   5   7    0.76    0.69 
   5  -5   7    0.85    0.77 
  -5  -5  -7    0.03    0.61 
  -5   5  -9    4.93    1.52 
   5   5   9    2.19    0.97 
  -5  -5   9    2.72    1.08 
   5  -5  -9    3.77    1.24 
  -5  -5   9    1.57    0.95 
   5   5  -9    4.74    1.38 
  -5  -5  -9    4.38    1.42 
   5  -5   9    1.76    0.95 
   5  -5   9    3.10    1.23 
  -5   5   9    1.90    1.00 
  -5  -6   0  146.08    3.22 
  -5   6   0  143.65    3.18 
  -5   6   0  144.02    3.36 
  -5  -6   0  144.78    3.11 
   5  -6   0  143.09    3.21 
  -5  -6   0  146.97    3.38 
   5   6   0  145.30    3.30 
  -5  -6   2   75.86    2.13 
   5   6   2   78.69    2.24 
  -5   6  -2   77.03    1.91 
  -5   6  -2   74.98    2.15 
  -5  -6   2   76.34    1.94 
   5   6   2   76.62    1.86 
  -5  -6   2   73.35    2.20 
  -5   6   2   78.46    2.18 
   5  -6   2   74.82    2.13 
  -5   6   2   76.15    2.15 
  -5   6   2   78.83    1.92 
  -5  -6  -2   79.26    2.23 
   5   6  -2   76.54    2.11 
  -5   6   2   77.41    2.05 
   5  -6   2   77.41    2.16 
  -5  -6   4   67.13    1.60 
  -5  -6   4   63.14    2.25 
   5   6   4   68.05    1.67 
  -5   6  -4   63.19    1.57 
   5   6   4   66.75    2.00 
   5   6   4   64.33    2.45 
  -5   6  -4   65.33    2.39 
  -5  -6   4   65.16    2.24 
  -5   6   4   62.15    1.99 
   5  -6   4   62.69    2.24 
  -5   6   4   67.20    2.00 
  -5   6   4   67.59    2.11 
   5  -6   4   66.66    2.17 
   5   6  -4   64.07    2.32 
  -5   6   4   66.44    2.41 
  -5  -6  -4   64.33    2.12 
  -5  -6   6    1.53    0.78 
   5   6   6    1.89    0.66 
   5   6   6   -0.13    0.78 
   5  -6  -6    1.05    0.60 
  -5   6  -6    1.13    0.91 
   5   6   6    1.43    0.47 
  -5  -6   6    2.28    0.77 
  -5   6   6    1.54    0.91 
  -5   6   6    2.40    0.68 
   5  -6   6    0.73    0.69 
  -5  -6  -6    1.33    0.68 
   5  -6   6    0.77    0.65 
  -5   6   6    1.74    0.67 
   5   6  -6    1.01    0.93 
   5   6   8    7.49    1.62 
  -5  -6   8    6.65    1.21 
  -5   6  -8    7.09    1.68 
   5  -6  -8   11.55    1.83 
  -5  -6   8    7.35    1.30 
   5   6   8    9.04    1.28 
   5  -6   8    6.29    1.28 
   5   6  -8    8.84    1.52 
  -5   6   8    8.28    1.24 
  -5   6   8    8.15    1.14 
   5  -6   8    7.94    1.30 
  -5  -7   1   53.35    1.50 
   5   7   1   52.62    1.53 
  -5   7  -1   52.43    1.48 
  -5  -7   1   51.57    1.60 
   5  -7  -1   52.63    1.40 
  -5   7  -1   53.28    1.54 
   5   7   1   53.49    1.26 
  -5  -7   1   51.56    1.55 
  -5  -7  -1   54.62    1.70 
  -5  -7  -1   55.03    1.26 
   5  -7   1   52.18    1.55 
  -5   7   1   56.42    1.70 
  -5   7   1   54.75    1.45 
   5   7  -1   53.89    1.57 
  -5  -7   3    8.59    0.84 
  -5  -7   3    6.50    0.79 
   5   7   3    7.40    0.89 
  -5  -7   3    7.85    0.54 
  -5   7  -3    6.56    0.85 
  -5   7  -3    7.76    0.53 
   5   7   3    8.47    0.64 
  -5   7   3    8.29    0.67 
   5   7  -3    6.46    0.84 
  -5   7   3    8.58    0.81 
  -5   7   3    9.64    0.98 
  -5  -7  -3    8.13    0.85 
   5  -7   3    9.86    0.92 
   5  -7   3    9.21    0.91 
  -5   7   3    8.81    0.73 
  -5   7  -5    6.18    1.13 
   5   7   5    5.85    0.76 
   5  -7  -5    5.64    0.79 
  -5  -7   5    3.91    0.79 
   5   7   5    5.90    0.56 
  -5  -7   5    5.06    0.91 
   5   7   5    4.71    1.00 
   5   7  -5    4.44    1.03 
  -5   7   5    6.65    1.14 
   5  -7   5    7.20    0.98 
  -5   7   5    5.25    0.71 
   5  -7   5    6.41    0.97 
  -5  -7  -5    5.51    0.86 
  -5   7   5    5.95    0.77 
  -5  -7   7    0.12    0.76 
   5   7   7    0.92    0.92 
  -5   7  -7   -0.32    0.92 
   5   7   7    0.70    0.65 
  -5  -7   7    0.09    0.73 
   5  -7  -7    1.17    0.64 
   5   7  -7   -0.46    0.90 
  -5  -7  -7    1.09    0.69 
  -5   7   7   -0.21    0.59 
  -5   7   7    0.51    0.65 
   5  -7   7   -0.31    0.67 
  -5   7   7    0.38    0.88 
   5  -7   7   -0.26    0.74 
   5   7   9    4.99    1.09 
   5  -7  -9    7.90    1.67 
  -5  -7   9    2.58    1.12 
  -5  -7   9    3.81    1.14 
  -5   7  -9    3.33    1.35 
   5   7  -9    3.97    1.33 
  -5  -7  -9    5.17    1.60 
  -5   7   9    4.13    1.09 
   5  -7   9    3.78    1.19 
   5  -7   9    2.62    1.22 
   5  -8   0   13.65    0.72 
  -5  -8   0   13.87    0.59 
   5   8   0   14.97    0.85 
  -5  -8   0   14.21    0.74 
  -5   8   0   15.25    0.76 
  -5  -8   0   13.97    0.87 
  -5   8   0   15.26    0.89 
  -5  -8   2    2.29    0.42 
  -5   8  -2    0.85    0.40 
   5   8   2    2.13    0.32 
  -5  -8   2    0.76    0.49 
  -5   8  -2    0.69    0.51 
   5   8   2    2.80    0.56 
  -5  -8   2    2.15    0.51 
  -5  -8  -2    1.19    0.58 
  -5   8   2    0.97    0.49 
   5  -8   2    2.48    0.56 
   5  -8   2    2.48    0.55 
  -5   8   2    1.26    0.53 
  -5   8   2    2.20    0.36 
   5   8  -2    2.18    0.56 
  -5  -8   4   50.24    1.92 
  -5  -8   4   51.89    2.02 
  -5  -8   4   48.85    1.23 
  -5   8  -4   50.60    2.06 
   5   8   4   48.03    2.11 
   5   8   4   48.13    1.59 
   5  -8   4   48.28    1.95 
   5   8  -4   46.79    1.97 
   5  -8   4   48.87    1.90 
  -5   8   4   47.97    1.58 
  -5   8   4   49.15    1.67 
  -5  -8  -4   50.67    1.89 
  -5   8   4   47.49    1.80 
  -5   8   4   47.03    2.07 
   5   8   6    2.74    0.98 
  -5   8  -6    2.49    1.07 
   5   8   6    2.10    0.47 
  -5  -8   6    1.55    0.77 
   5  -8  -6    1.17    0.66 
   5   8   6    2.14    0.66 
  -5  -8   6    1.48    0.83 
   5  -8   6   -0.36    0.66 
   5  -8   6    0.98    0.72 
  -5   8   6    3.49    0.74 
   5   8  -6    0.02    0.89 
  -5   8   6    2.26    0.92 
  -5   8   6    1.95    0.64 
  -5  -8  -6    1.77    0.75 
   5   8   8   -0.18    1.01 
  -5  -8   8    2.72    1.02 
  -5  -8   8    1.03    0.87 
  -5   8  -8    2.05    1.16 
   5   8   8    1.08    0.78 
   5  -8   8    0.30    0.84 
   5   8  -8    1.62    1.09 
   5  -8   8    0.16    0.94 
  -5   8   8    0.73    0.74 
  -5   8   8    1.75    0.74 
   5  -9  -1   51.57    1.42 
  -5  -9   1   48.09    1.56 
   5   9   1   50.90    1.22 
  -5   9  -1   53.48    1.61 
  -5  -9   1   51.57    1.66 
  -5   9  -1   54.75    1.60 
   5   9   1   53.33    1.60 
  -5  -9   1   53.69    1.52 
   5  -9   1   54.85    1.63 
  -5   9   1   55.39    1.51 
  -5  -9  -1   54.15    1.31 
  -5  -9  -1   53.89    1.78 
   5   9  -1   52.59    1.67 
  -5  -9   3    1.68    0.35 
  -5   9  -3    1.05    0.64 
  -5  -9   3    1.39    0.52 
   5   9   3    2.12    0.64 
  -5  -9   3    1.52    0.58 
   5   9   3    1.75    0.34 
  -5   9  -3    1.58    0.34 
   5  -9   3    1.78    0.57 
   5   9  -3    1.75    0.67 
   5  -9   3    2.42    0.63 
  -5   9   3    1.25    0.58 
  -5  -9  -3    1.51    0.58 
  -5   9   3    1.06    0.44 
  -5   9   3    2.06    0.58 
  -5   9   3    2.36    0.42 
  -5  -9   5   12.84    1.29 
  -5  -9   5   12.44    1.23 
  -5   9  -5   13.12    1.46 
   5   9   5   12.24    1.46 
   5  -9  -5   11.38    1.06 
   5   9   5    9.63    0.90 
  -5   9   5   10.91    1.33 
   5  -9   5   11.89    1.26 
   5  -9   5   11.71    1.23 
   5   9  -5    9.90    1.22 
  -5   9   5   10.41    0.93 
  -5  -9  -5   12.81    1.20 
  -5   9   5   11.90    1.01 
  -5  -9   7    1.53    0.83 
  -5   9  -7    3.42    1.19 
   5   9   7    3.69    1.20 
   5   9   7    4.19    0.88 
   5  -9  -7    2.34    0.76 
  -5  -9   7    1.44    0.84 
  -5   9   7    3.18    0.81 
   5   9  -7    2.78    1.11 
   5  -9   7    2.52    0.96 
  -5   9   7    2.36    1.09 
  -5  -9  -7    4.53    0.95 
   5  -9   7    2.62    0.94 
  -5   9   7    3.31    0.77 
   5  -9  -9    2.98    1.46 
  -5  -9   9    2.93    1.14 
   5   9   9    0.35    1.12 
  -5  -9   9    1.03    1.00 
  -5   9  -9    2.94    1.36 
   5  -9   9    1.92    1.08 
   5  -9   9    1.39    1.15 
  -5   9   9    2.38    0.93 
   5   9  -9    1.68    1.16 
  -5 -10   0   14.76    0.97 
   5  10   0   17.73    1.01 
  -5  10   0   18.15    1.02 
   5 -10   0   17.20    0.82 
  -5 -10   0   15.54    0.65 
  -5 -10   0   15.86    0.83 
  -5  10   0   16.29    0.86 
  -5 -10   2   83.53    2.44 
  -5 -10   2   83.29    2.31 
  -5  10  -2   81.59    2.10 
   5 -10  -2   84.98    2.04 
  -5  10  -2   80.86    2.29 
  -5 -10   2   80.32    2.15 
   5  10   2   82.31    2.39 
   5 -10   2   82.78    2.38 
  -5  10   2   83.72    2.32 
   5  10  -2   76.38    2.30 
  -5 -10  -2   83.03    2.48 
  -5  10   2   81.93    2.46 
   5 -10   2   82.74    2.41 
  -5 -10   4   13.40    0.56 
   5  10   4   13.92    0.82 
   5  10   4   15.18    1.32 
  -5 -10   4   14.14    1.26 
  -5  10  -4   13.43    1.27 
  -5 -10   4   11.89    1.13 
  -5  10   4   13.97    0.94 
   5 -10   4   14.12    1.23 
  -5 -10  -4   13.11    1.19 
  -5  10   4   15.43    1.19 
  -5  10   4   13.16    0.83 
   5 -10   4   12.39    1.14 
   5  10  -4   14.29    1.29 
  -5  10   4   13.14    1.28 
  -5 -10   6    6.86    1.11 
   5  10   6    7.17    0.88 
   5  10   6    7.18    1.24 
  -5  10  -6    6.84    1.27 
  -5 -10   6    4.61    1.00 
   5 -10  -6    6.18    0.97 
  -5  10   6    8.85    0.94 
   5 -10   6    7.68    1.14 
  -5  10   6    7.47    0.87 
  -5 -10  -6    6.08    1.01 
   5 -10   6    5.26    1.02 
  -5  10   6    7.28    1.30 
   5  10  -6    8.58    1.31 
   5  10   8   -0.98    0.89 
  -5  10  -8    2.00    1.27 
   5  10   8   -0.32    0.62 
  -5 -10   8    0.62    0.86 
  -5 -10   8    1.17    0.94 
  -5  10   8    1.14    1.14 
   5  10  -8    1.66    1.11 
   5 -10   8    0.08    0.96 
   5 -10   8   -0.73    0.84 
  -5  10   8    1.51    0.78 
  -5 -11   1    3.85    0.58 
  -5  11  -1    3.73    0.59 
   5  11   1    3.24    0.55 
   5 -11  -1    3.77    0.46 
  -5 -11   1    2.93    0.56 
  -5  11  -1    2.85    0.57 
  -5 -11   1    3.97    0.50 
   5 -11   1    3.64    0.55 
  -5  11   1    3.64    0.66 
   5  11  -1    2.49    0.60 
  -5 -11  -1    3.22    0.66 
  -5  11   1    4.25    0.55 
  -5 -11  -1    3.67    0.37 
  -5 -11   3    5.79    0.76 
  -5 -11   3    3.24    0.68 
  -5  11  -3    5.11    0.48 
   5  11   3    5.98    0.84 
   5  11   3    5.19    0.47 
  -5  11  -3    3.78    0.73 
  -5 -11   3    4.28    0.49 
   5 -11   3    5.68    0.80 
   5 -11   3    5.16    0.77 
  -5 -11  -3    5.40    0.82 
  -5  11   3    6.43    0.82 
  -5  11   3    6.35    0.56 
   5  11  -3    6.00    0.90 
  -5  11   3    4.93    0.80 
   5 -11  -5    2.29    0.75 
  -5  11  -5    4.31    1.04 
   5  11   5    4.45    0.63 
  -5 -11   5    2.50    0.80 
   5  11   5    4.19    1.00 
  -5 -11   5    2.42    0.81 
   5  11  -5    3.73    0.95 
   5 -11   5    4.54    0.90 
  -5 -11  -5    3.69    0.86 
   5 -11   5    3.48    0.83 
  -5  11   5    4.91    0.69 
  -5  11   5    2.62    0.91 
  -5  11   5    4.87    0.72 
  -5 -11   7    2.27    0.93 
  -5  11  -7    1.97    1.10 
  -5 -11   7    1.55    0.87 
   5 -11  -7    1.40    0.73 
   5  11   7    2.50    1.10 
   5  11   7    3.06    0.70 
   5  11  -7    3.03    1.13 
   5 -11   7    2.96    0.98 
  -5  11   7    2.84    0.72 
  -5 -11  -7    1.25    0.83 
   5 -11   7    1.62    0.86 
  -5  11   7    2.00    1.11 
  -5  11   7    1.52    0.70 
  -5  11  -9    4.06    1.47 
   5  11   9    2.10    1.34 
  -5 -11   9    0.72    0.92 
  -5 -11   9    2.97    1.17 
   5  11  -9    1.87    1.25 
  -5  11   9    1.97    1.07 
   5 -11   9    4.61    1.28 
   5 -11   9    2.11    1.18 
  -5 -12   0    3.59    0.65 
  -5  12   0    4.22    0.68 
   5  12   0    5.40    0.73 
  -5  12   0    6.15    0.72 
   5 -12   0    4.65    0.56 
  -5 -12   0    4.49    0.54 
  -5 -12   0    4.38    0.39 
   5 -12  -2   33.33    1.06 
  -5  12  -2   33.77    1.43 
  -5 -12   2   32.79    1.47 
  -5 -12   2   32.08    1.25 
   5  12   2   33.25    1.41 
  -5 -12   2   33.12    1.33 
  -5  12  -2   32.11    1.22 
  -5 -12  -2   34.57    1.55 
  -5  12   2   33.56    1.52 
   5 -12   2   33.90    1.50 
  -5  12   2   32.99    1.36 
   5  12  -2   33.08    1.49 
   5 -12   2   34.06    1.42 
   5  12   4   11.52    1.25 
  -5 -12   4   10.12    1.08 
  -5 -12   4   10.27    0.55 
  -5  12  -4    9.96    1.14 
   5  12   4   10.21    0.67 
  -5 -12   4   10.71    1.14 
   5 -12  -4   10.38    1.07 
  -5 -12  -4    9.97    1.12 
  -5  12   4   11.59    0.77 
  -5  12   4   11.19    1.28 
   5 -12   4    9.34    1.05 
   5 -12   4   10.16    1.12 
   5  12  -4   11.70    1.29 
   5 -12  -6    7.44    1.11 
  -5 -12   6    5.34    1.09 
   5  12   6    7.66    0.85 
   5  12   6    9.54    1.55 
  -5 -12   6    6.87    1.06 
  -5  12  -6    7.63    1.30 
  -5  12   6    9.44    0.94 
  -5 -12  -6    7.52    1.13 
  -5  12   6    8.72    1.40 
   5  12  -6    6.71    1.27 
  -5  12   6    7.70    0.89 
   5 -12   6    7.50    1.23 
   5 -12   6    8.15    1.28 
  -5 -12   8    5.30    1.30 
   5 -12  -8    7.57    1.20 
  -5 -12   8    7.58    1.36 
  -5  12  -8    6.61    1.51 
   5  12   8    9.74    1.82 
  -5 -12  -8    8.38    1.31 
  -5  12   8   10.11    1.94 
   5 -12   8   12.89    1.71 
   5 -12   8   10.29    1.69 
  -5  12   8   10.53    1.19 
   5  12  -8   11.17    1.69 
  -5  13  -1    4.64    0.71 
   5 -13  -1    5.90    0.54 
  -5 -13   1    6.28    0.58 
  -5 -13   1    5.01    0.66 
   5  13   1    7.40    0.81 
  -5  13  -1    5.95    0.71 
  -5 -13   1    4.49    0.63 
   5 -13   1    6.32    0.68 
  -5  13   1    7.00    0.75 
  -5  13   1    5.77    0.78 
  -5 -13  -1    5.61    0.52 
   5  13  -1    4.92    0.75 
  -5 -13  -1    5.28    0.77 
   5 -13  -3   17.88    0.83 
   5  13   3   19.50    1.29 
  -5 -13   3   17.79    0.89 
  -5 -13   3   18.07    1.29 
  -5  13  -3   18.15    0.86 
  -5  13  -3   19.14    1.29 
  -5 -13   3   18.78    1.17 
  -5 -13  -3   20.58    1.34 
  -5  13   3   19.95    1.38 
  -5  13   3   17.59    1.24 
   5 -13   3   18.64    1.23 
   5 -13   3   21.05    1.34 
   5  13  -3   18.02    1.29 
   5 -13  -5   14.84    1.33 
  -5  13  -5   11.22    1.34 
   5  13   5   13.61    1.49 
  -5 -13   5   13.45    1.42 
  -5 -13   5   15.66    1.35 
   5  13   5   15.17    0.87 
  -5  13   5   13.56    0.96 
   5 -13   5   15.86    1.44 
  -5  13   5   13.43    1.51 
  -5 -13  -5   16.10    1.38 
   5  13  -5   13.58    1.51 
   5 -13   5   13.41    1.33 
  -5  13  -7    9.88    1.57 
  -5 -13   7    9.56    1.44 
  -5 -13   7   10.33    1.49 
   5 -13  -7    9.77    1.28 
   5  13   7    8.88    1.58 
   5 -13   7    8.27    1.34 
  -5  13   7   11.63    1.11 
   5 -13   7   12.12    1.56 
  -5 -13  -7    9.87    1.37 
   5  13  -7    9.12    1.56 
  -5  13   7   11.63    1.76 
  -5 -13   9    0.59    1.02 
  -5 -13   9    0.69    0.89 
  -5  13  -9    2.58    1.36 
   5  13   9    0.24    1.19 
   5 -13   9    0.93    1.07 
   5  13  -9    1.59    1.24 
  -5  13   9    0.46    1.23 
   5 -13   9    3.11    1.33 
   5  14   0   80.91    2.46 
  -5  14   0   80.03    2.34 
  -5  14   0   80.34    2.44 
  -5 -14   0   81.68    2.22 
  -5 -14   0   82.05    2.47 
   5 -14   0   79.48    2.12 
  -5 -14   0   80.29    1.93 
   5  14   2   27.48    1.34 
  -5  14  -2   27.76    1.18 
   5 -14  -2   25.88    0.95 
  -5 -14   2   25.74    1.16 
  -5  14  -2   27.36    1.39 
  -5 -14   2   29.49    1.42 
  -5 -14   2   29.60    1.26 
   5 -14   2   29.47    1.36 
   5  14  -2   28.79    1.48 
  -5 -14  -2   27.57    1.47 
  -5  14   2   28.27    1.29 
  -5  14   2   28.90    1.51 
   5 -14   2   26.84    1.44 
  -5 -14   4    2.06    0.37 
  -5 -14   4    0.79    0.69 
   5  14   4    1.38    0.73 
   5 -14  -4    0.39    0.66 
  -5  14  -4    0.99    0.82 
  -5 -14   4    1.60    0.65 
   5 -14   4    2.15    0.74 
  -5  14   4    2.57    0.79 
   5 -14   4    1.36    0.67 
   5  14  -4    0.56    0.78 
  -5 -14  -4    1.72    0.80 
   5 -14   4    1.47    0.31 
  -5  14   4    1.05    0.42 
  -5  14  -6    3.36    1.04 
   5 -14  -6    4.97    0.99 
  -5 -14   6    4.55    1.01 
   5  14   6    3.67    1.12 
   5  14   6    5.70    0.67 
  -5 -14   6    2.44    0.96 
  -5  14   6    4.30    1.21 
   5 -14   6    4.40    1.06 
  -5 -14  -6    3.61    0.99 
  -5  14   6    4.33    0.73 
   5 -14   6    5.63    1.13 
   5  14  -6    5.36    1.18 
  -5 -14   8    0.31    0.88 
  -5  14  -8    0.16    1.12 
  -5 -14   8    1.36    1.09 
   5  14   8    0.76    1.06 
   5 -14  -8    0.77    0.84 
  -5 -14  -8    0.28    0.87 
   5  14  -8    1.11    1.09 
   5 -14   8    1.28    0.98 
  -5  14   8    1.42    1.25 
   5 -14   8   -0.70    0.93 
  -5  15  -1    5.78    0.74 
  -5 -15   1    6.75    0.74 
  -5 -15   1    5.86    0.73 
   5  15   1    8.22    0.90 
  -5 -15   1    6.33    0.59 
  -5  15  -1    5.17    0.79 
   5 -15  -1    6.50    0.65 
  -5  15   1    5.85    0.86 
   5  15  -1    5.95    0.84 
  -5 -15  -1    6.20    0.56 
  -5  15   1    7.21    0.81 
   5 -15   1    6.21    0.69 
  -5 -15  -1    6.01    0.84 
   5  15   3    2.75    0.70 
  -5 -15   3    0.47    0.60 
  -5 -15   3    2.54    0.62 
  -5  15  -3    1.56    0.71 
   5 -15  -3    1.36    0.67 
  -5 -15   3    2.44    0.49 
   5 -15  -3    2.70    0.43 
   5  15  -3    1.23    0.77 
  -5  15   3    0.70    0.60 
   5 -15   3    2.78    0.68 
  -5 -15  -3    2.27    0.75 
   5 -15   3    2.09    0.71 
  -5  15  -5    3.79    1.02 
  -5 -15   5    2.17    0.81 
  -5 -15   5    1.59    0.73 
   5  15   5    3.72    1.08 
   5  15   5    3.53    0.47 
   5 -15  -5    3.64    0.87 
   5  15  -5    2.82    1.04 
  -5 -15  -5    3.31    0.92 
  -5  15   5    3.18    0.95 
   5 -15   5    2.62    0.88 
   5 -15   5    2.63    0.80 
  -5  15   5    2.90    0.57 
  -5  15  -7    2.92    1.16 
  -5 -15   7    1.18    0.94 
  -5 -15   7    0.31    0.89 
   5 -15  -7   -0.13    0.71 
   5  15   7    2.34    1.11 
   5 -15   7    1.40    0.95 
  -5  15   7    1.62    1.13 
   5 -15   7    2.45    1.02 
  -5  15   7    3.27    0.79 
   5  15  -7    2.24    1.11 
  -5 -15  -7    0.96    0.90 
   5  15   9    1.14    1.31 
  -5  15  -9    2.66    1.42 
  -5 -15   9    1.07    1.17 
  -5 -15   9    0.55    0.99 
   5 -15   9   -0.12    1.09 
   5  15  -9    3.22    1.33 
   5 -15   9    2.15    1.33 
  -5  15   9    1.18    1.54 
  -5 -16   0   21.90    0.79 
   5  16   0   23.42    1.35 
  -5  16   0   20.72    1.29 
  -5  16   0   22.77    1.26 
   5 -16   0   23.32    1.05 
  -5 -16   0   23.57    1.10 
  -5 -16   0   21.56    1.32 
  -5  16  -2    7.02    0.77 
  -5 -16   2    6.71    0.76 
  -5 -16   2    7.28    0.88 
  -5  16  -2    6.68    0.96 
   5 -16  -2    6.54    0.61 
   5  16   2    7.82    0.92 
  -5 -16   2    7.05    0.74 
  -5  16   2    7.95    0.91 
  -5  16   2    6.05    0.94 
   5  16  -2    6.31    0.94 
  -5 -16  -2    7.11    0.98 
   5 -16   2    5.39    0.75 
   5 -16   2    6.47    0.89 
  -5 -16   4    2.60    0.80 
  -5 -16   4    2.06    0.44 
   5 -16  -4    2.62    0.81 
  -5  16  -4    3.05    0.98 
  -5 -16   4    1.60    0.68 
   5 -16  -4    3.49    0.51 
   5  16   4    2.54    0.77 
   5 -16   4    2.03    0.73 
   5  16  -4    2.53    0.87 
  -5  16   4    2.71    0.82 
   5 -16   4    3.22    0.85 
   5 -16   4    3.28    0.42 
  -5 -16  -4    2.04    0.82 
   5 -16  -6    3.78    0.96 
   5  16   6    3.61    1.18 
  -5  16  -6    3.65    1.21 
  -5 -16   6    3.12    1.01 
  -5 -16   6    3.92    1.04 
  -5 -16  -6    2.14    0.94 
   5 -16   6    4.96    1.10 
   5  16  -6    3.03    1.10 
  -5  16   6    2.88    1.12 
  -5  16   6    3.89    0.69 
   5 -16   6    2.19    0.93 
  -5  16  -8    3.06    1.29 
  -5 -16   8    1.02    1.03 
   5 -16  -8    1.94    0.94 
   5  16   8    1.33    1.20 
  -5 -16   8    2.32    0.97 
   5  16  -8    2.23    1.22 
   5 -16   8    3.69    1.36 
  -5 -16  -8    1.56    1.00 
  -5  16   8    1.66    1.35 
   5 -16   8    0.67    1.01 
  -5 -17   1    4.74    0.75 
  -5  17  -1    4.86    0.86 
  -5  17  -1    5.67    0.80 
  -5 -17   1    5.20    0.57 
   5  17   1    5.70    0.82 
   5 -17  -1    4.75    0.54 
  -5 -17   1    4.51    0.70 
  -5 -17  -1    5.38    0.88 
  -5  17   1    5.98    0.79 
   5 -17   1    5.15    0.68 
  -5 -17  -1    5.14    0.55 
   5  17  -1    4.76    0.85 
  -5  17   1    5.53    0.90 
  -5 -17   3   18.30    1.23 
  -5 -17   3   19.75    1.09 
  -5 -17   3   19.63    1.41 
  -5  17  -3   16.32    1.45 
   5 -17  -3   16.28    1.40 
   5 -17  -3   19.10    0.83 
   5  17   3   21.15    1.42 
   5  17  -3   20.41    1.55 
  -5  17   3   17.61    1.31 
   5 -17   3   18.57    1.44 
  -5 -17  -3   19.29    1.47 
   5 -17   3   18.69    1.28 
   5 -17   3   19.30    0.96 
  -5  17  -5    5.39    1.16 
  -5 -17   5    4.89    1.08 
   5  17   5    5.44    1.22 
   5 -17  -5    7.43    1.17 
   5 -17  -5    7.79    0.74 
  -5 -17   5    4.87    0.98 
   5 -17   5    6.78    1.12 
   5  17  -5    7.24    1.38 
   5 -17   5    6.35    1.12 
  -5  17   5    7.22    1.30 
  -5 -17  -5    6.04    1.08 
  -5 -17   7    4.06    1.16 
  -5 -17   7    5.97    1.33 
   5 -17  -7    3.91    1.05 
   5  17   7    6.22    1.53 
  -5  17  -7    5.76    1.39 
  -5 -17  -7    4.89    1.16 
   5 -17   7    4.55    1.21 
   5  17  -7    2.64    1.26 
   5 -17   7    2.36    1.03 
  -5  17   7    5.10    1.55 
  -5  17  -9    1.25    1.42 
  -5 -17   9    1.64    1.13 
  -5 -17   9    0.25    1.10 
   5  17   9   -0.03    1.30 
   5 -17   9    0.88    1.18 
   5 -17   9    1.85    1.36 
  -5  17   9   -0.63    1.28 
   5  17  -9    0.79    1.22 
   5 -18   0   22.05    1.07 
  -5 -18   0   22.79    1.37 
   5  18   0   21.43    1.41 
  -5 -18   0   22.23    1.14 
  -5 -18   0   21.67    0.81 
  -5  18   0   22.59    1.38 
  -5  18   0   21.27    1.42 
   5 -18  -2   12.40    1.20 
   5 -18  -2   10.47    0.71 
   5  18   2   12.04    1.08 
  -5 -18   2   10.34    0.89 
  -5 -18   2   10.52    0.96 
  -5 -18   2   10.65    1.06 
  -5  18  -2    8.36    1.08 
  -5 -18  -2   10.33    0.61 
   5  18  -2   12.81    1.31 
  -5 -18  -2   11.67    1.19 
  -5  18   2   12.23    1.07 
   5 -18   2   10.57    0.91 
   5 -18   2   12.85    1.23 
   5 -18   2   12.86    1.05 
  -5 -18   4   22.50    1.67 
  -5 -18   4   23.64    1.06 
  -5 -18   4   21.48    1.48 
  -5  18  -4   22.75    1.68 
   5  18   4   21.93    1.64 
   5 -18  -4   21.41    1.58 
   5 -18  -4   22.75    0.97 
   5  18  -4   21.67    1.77 
   5 -18   4   26.06    1.60 
  -5  18   4   24.24    1.67 
   5 -18   4   23.56    1.68 
  -5 -18  -4   23.03    1.67 
   5 -18   4   22.36    0.95 
   5 -18  -6    6.26    1.09 
  -5 -18   6    6.44    1.30 
   5  18   6    5.36    1.32 
  -5  18  -6    4.59    1.27 
  -5 -18   6    3.44    1.02 
   5  18  -6    4.90    1.27 
   5 -18   6    8.27    1.40 
   5 -18   6    5.15    1.12 
  -5 -18  -6    3.21    1.02 
  -5  18   6    6.43    1.39 
   5  18   8    1.89    1.25 
  -5 -18   8   -0.12    0.98 
  -5  18  -8    0.60    1.31 
   5 -18  -8   -0.18    0.90 
  -5 -18   8    0.09    0.87 
  -5  18   8    0.92    1.31 
  -5 -18  -8    0.88    1.08 
   5 -18   8    0.81    1.10 
   5 -18   8    3.13    1.31 
   5  18  -8    2.26    1.28 
  -5  19  -1    4.97    0.97 
  -5 -19   1    4.64    0.55 
  -5 -19   1    4.67    0.74 
   5 -19  -1    5.82    0.59 
  -5 -19   1    4.35    0.77 
   5 -19  -1    5.12    0.89 
   5  19   1    5.34    0.89 
  -5 -19  -1    3.84    0.82 
   5  19  -1    4.88    0.93 
  -5  19   1    5.15    0.80 
   5 -19   1    4.17    0.71 
  -5 -19  -1    3.98    0.55 
   5 -19   1    5.03    0.69 
   5 -19   1    5.36    0.84 
  -5  19  -3    5.62    1.04 
  -5 -19   3    6.16    0.99 
   5 -19  -3    5.95    0.56 
   5  19   3    6.47    0.98 
  -5 -19   3    6.17    0.75 
  -5 -19   3    5.91    0.85 
   5 -19  -3    5.74    1.01 
   5  19  -3    5.30    1.13 
   5 -19   3    5.89    0.91 
  -5  19   3    5.63    0.95 
  -5 -19  -3    6.76    1.09 
   5 -19   3    4.86    0.94 
   5 -19   3    6.94    0.73 
  -5  19  -5    2.38    1.08 
  -5 -19   5    0.09    0.73 
   5  19   5    2.51    1.02 
   5 -19  -5    2.34    0.93 
  -5 -19   5    1.70    0.78 
  -5 -19  -5    2.18    0.96 
   5  19  -5    1.35    1.05 
   5 -19   5    2.41    0.84 
   5 -19   5    1.32    0.86 
  -5  19   5    1.62    0.90 
   5  19   7    2.82    1.32 
   5 -19  -7    1.02    0.84 
  -5 -19   7    1.54    0.93 
  -5  19  -7    2.83    1.32 
  -5 -19   7    1.76    1.06 
   5 -19   7    2.43    1.14 
  -5 -19  -7    1.83    1.06 
   5  19  -7    1.46    1.18 
   5 -19   7   -0.46    0.90 
  -5  19   7    1.96    1.24 
  -5 -20   0    1.57    0.33 
   5  20   0    1.98    0.79 
  -5 -20   0    2.26    0.55 
  -5  20   0    2.82    0.80 
  -5 -20   0    1.73    0.71 
   5 -20   0    1.42    0.48 
   5 -20   0    2.43    0.71 
   5 -20  -2   21.62    0.95 
   5  20   2   24.34    1.45 
  -5 -20   2   23.11    1.51 
   5 -20  -2   23.22    1.53 
  -5 -20   2   21.16    1.30 
  -5  20  -2   24.75    1.68 
  -5 -20   2   23.73    1.24 
   5 -20   2   23.25    1.35 
  -5  20   2   24.39    1.40 
   5  20  -2   23.36    1.74 
   5 -20   2   23.48    1.59 
  -5 -20  -2   22.66    0.92 
  -5 -20  -2   22.90    1.66 
   5 -20   2   23.81    1.29 
  -5 -20   4   20.38    1.09 
  -5 -20   4   22.85    1.51 
  -5  20  -4   20.07    1.77 
  -5 -20   4   20.36    1.66 
   5  20   4   20.96    1.66 
   5 -20  -4   20.68    1.61 
  -5 -20  -4   22.27    1.71 
   5  20  -4   20.66    1.86 
   5 -20   4   17.46    1.45 
  -5  20   4   20.00    1.61 
   5 -20   4   22.87    1.02 
   5 -20   4   20.96    1.73 
   5 -20  -6    2.71    0.97 
   5  20   6    4.11    1.26 
  -5 -20   6    1.84    0.97 
  -5  20  -6    7.26    1.48 
  -5 -20   6    6.19    1.18 
  -5  20   6    5.86    1.40 
   5 -20   6    3.58    1.06 
   5  20  -6    2.51    1.16 
  -5 -20  -6    4.22    1.16 
   5 -20   6    4.35    1.16 
  -5  20  -8    4.32    1.54 
   5  20   8    3.85    1.50 
  -5 -20   8    2.60    1.12 
  -5 -20   8    4.39    1.40 
   5 -20  -8    4.97    1.25 
   5 -20   8    3.34    1.38 
   5  20  -8    2.98    1.35 
   5 -20   8    5.67    1.52 
  -5 -20  -8    3.74    1.27 
  -5  20   8    4.39    1.69 
  -5 -21   1    2.77    0.75 
   5 -21  -1    4.36    0.86 
   5 -21  -1    3.32    0.54 
   5  21   1    3.91    0.81 
  -5 -21   1    4.40    0.75 
  -5 -21   1    4.31    0.58 
  -5  21  -1    5.60    1.02 
   5 -21   1    4.71    0.69 
   5 -21   1    3.82    0.84 
   5 -21   1    4.44    0.76 
  -5 -21  -1    4.12    0.60 
   5  21  -1    4.18    1.03 
  -5  21   1    4.82    0.87 
  -5 -21  -1    2.49    0.82 
  -5 -21   3    4.52    0.72 
   5  21   3    6.50    1.12 
   5 -21  -3    6.89    1.07 
  -5 -21   3    5.14    0.82 
  -5  21  -3    4.32    1.07 
  -5 -21   3    4.24    0.89 
   5 -21   3    4.99    0.69 
  -5 -21  -3    5.33    1.09 
   5 -21   3    4.93    0.88 
  -5  21   3    4.70    0.91 
   5  21  -3    3.87    1.15 
   5 -21   3    5.45    0.98 
  -5  21  -5    1.63    1.03 
  -5 -21   5   -0.10    0.62 
  -5 -21   5    1.09    0.82 
   5  21   5   -0.43    0.72 
   5 -21  -5    0.53    0.77 
   5  21  -5   -0.63    0.96 
   5 -21   5    0.12    0.73 
  -5 -21  -5    0.62    0.91 
  -5  21   5   -0.56    0.80 
   5 -21   5    0.11    0.81 
  -5 -21   7    5.19    1.17 
  -5  21  -7    4.76    1.48 
  -5 -21   7    4.29    1.31 
   5 -21  -7    6.36    1.29 
   5  21   7    3.79    1.36 
  -5  21   7    5.66    1.59 
   5 -21   7    3.14    1.20 
   5 -21   7    4.35    1.28 
  -5 -21  -7    4.09    1.26 
   5  21  -7    5.05    1.44 
   5  22   0   63.03    2.51 
   5 -22   0   63.85    1.97 
  -5 -22   0   65.26    2.47 
  -5  22   0   64.76    2.46 
   5 -22   0   62.09    2.39 
  -5 -22   0   64.00    2.17 
  -5 -22   0   62.11    1.67 
  -5 -22   2    6.37    0.96 
   5 -22  -2    8.91    1.17 
  -5 -22   2    6.94    0.94 
  -5 -22   2    9.03    0.89 
  -5  22  -2    6.99    1.15 
   5  22   2    7.81    1.10 
   5 -22   2    8.76    1.13 
   5 -22   2    6.86    0.90 
   5 -22   2    7.26    0.92 
  -5 -22  -2    7.24    1.16 
  -5  22   2    7.20    0.98 
  -5 -22  -2    6.56    0.62 
   5  22  -2    7.09    1.23 
   5  22   4   19.01    1.65 
   5 -22  -4   14.99    1.56 
  -5 -22   4   19.18    1.71 
  -5  22  -4   17.31    1.80 
  -5 -22   4   17.54    1.40 
  -5  22   4   19.85    1.66 
   5 -22   4   17.43    1.49 
  -5 -22  -4   21.17    1.82 
   5  22  -4   19.48    1.88 
   5 -22   4   17.69    1.68 
  -5  22  -6    1.80    1.16 
  -5 -22   6    0.40    0.78 
   5 -22  -6    0.34    0.82 
   5  22   6    1.38    1.01 
  -5 -22   6    0.39    0.89 
  -5  22   6    1.79    1.19 
   5 -22   6    0.81    0.90 
  -5 -22  -6    1.21    0.96 
   5  22  -6    1.32    1.17 
   5 -22   6    1.58    1.04 
  -5 -22   8    0.98    1.13 
  -5  22  -8    0.19    1.29 
  -5 -22   8    0.27    0.86 
   5 -22  -8    2.60    1.15 
   5  22   8    2.38    1.44 
   5 -22   8    1.13    1.19 
   5 -22   8   -0.63    0.99 
   5  22  -8   -0.21    1.21 
  -5  22   8    0.90    1.38 
  -5 -22  -8   -0.32    1.13 
  -5 -23   1   24.48    1.11 
   5 -23  -1   23.69    1.62 
   5 -23  -1   24.55    1.08 
  -5  23  -1   25.63    1.77 
  -5 -23   1   22.93    1.54 
  -5 -23   1   27.19    1.51 
   5  23   1   26.54    1.60 
  -5  23   1   25.31    1.54 
   5 -23   1   23.32    1.51 
   5  23  -1   25.48    1.81 
   5 -23   1   25.16    1.66 
   5 -23   1   25.17    1.32 
  -5 -23  -1   26.27    1.25 
  -5 -23  -1   27.74    1.79 
  -5 -23   3    2.54    0.82 
  -5 -23   3    2.69    0.71 
   5  23   3    3.25    0.86 
  -5 -23   3    3.28    0.72 
   5 -23  -3    1.11    0.85 
  -5  23  -3    2.36    1.04 
   5  23  -3    2.38    1.04 
   5 -23   3    3.55    0.81 
  -5  23   3    3.07    0.84 
   5 -23   3    1.48    0.82 
   5 -23   3    3.50    0.69 
  -5 -23  -3    4.03    1.05 
  -5 -23   5    1.18    0.78 
  -5  23  -5    0.57    1.00 
   5 -23  -5   -0.04    0.77 
   5  23   5    1.62    0.90 
  -5 -23   5    1.22    0.94 
  -5  23   5    1.16    0.95 
   5 -23   5    0.15    0.77 
  -5 -23  -5    1.60    0.95 
   5 -23   5    1.38    0.94 
   5  23  -5    0.90    1.10 
   5  23   7   -0.14    1.14 
  -5 -23   7   -0.02    0.83 
   5 -23  -7    2.36    1.05 
  -5 -23   7    1.60    1.12 
  -5  23  -7    0.17    1.21 
   5 -23   7    1.79    1.13 
  -5 -23  -7   -0.03    0.99 
  -5  23   7   -0.18    1.17 
   5 -23   7    0.94    1.11 
   5  23  -7    1.63    1.26 
  -5 -24   0   14.25    1.14 
  -5 -24   0   16.02    1.44 
   5 -24   0   15.19    1.36 
  -5 -24   0   15.44    0.72 
   5 -24   0   17.62    1.47 
   5 -24   0   14.98    0.99 
   5  24   0   14.28    1.50 
  -5  24   0   14.24    1.55 
   5  24   2   29.98    1.75 
  -5 -24   2   27.05    1.73 
   5 -24  -2   25.70    1.83 
  -5 -24   2   26.41    1.60 
  -5  24  -2   26.06    1.95 
  -5 -24   2   29.23    1.39 
   5 -24   2   28.52    1.58 
   5  24  -2   29.27    2.07 
  -5 -24  -2   25.37    1.14 
   5 -24   2   27.76    1.53 
  -5  24   2   29.05    1.67 
   5 -24   2   28.37    1.87 
  -5 -24  -2   30.15    1.91 
   5 -24  -4    1.40    0.88 
  -5 -24   4    4.22    0.86 
   5  24   4    1.80    0.90 
  -5  24  -4    1.48    1.05 
  -5 -24   4    3.46    0.98 
   5  24  -4    2.58    1.16 
   5 -24   4    2.00    0.92 
   5 -24   4    3.17    0.86 
  -5 -24  -4    3.47    1.05 
  -5  24   4    2.20    0.94 
  -5 -24   6    0.26    0.88 
  -5 -24   6    0.74    0.77 
   5 -24  -6   -0.36    0.84 
   5  24   6   -0.70    0.93 
  -5  24  -6    0.67    1.28 
  -5 -24  -6    1.26    1.01 
   5  24  -6    1.76    1.23 
   5 -24   6   -0.39    0.89 
  -5  24   6    0.14    1.01 
   5 -24   6   -0.65    0.76 
  -5 -24   8    2.18    1.20 
   5 -24   8    0.91    1.15 
  -5 -25   1    3.99    0.79 
   5  25   1    5.93    1.02 
   5 -25  -1    5.43    1.02 
  -5 -25   1    5.90    0.67 
  -5 -25   1    8.31    1.17 
   5 -25  -1    5.50    0.61 
  -5  25  -1    5.06    1.10 
   5 -25   1    5.31    0.79 
  -5 -25  -1    5.47    1.09 
  -5  25   1    5.43    1.01 
   5  25  -1    5.66    1.20 
   5 -25   1    5.00    0.97 
  -5 -25  -1    5.15    0.71 
   5 -25   1    4.43    0.95 
   5  25   3    3.79    0.95 
  -5 -25   3    5.86    1.05 
  -5 -25   3    5.07    0.85 
  -5  25  -3    6.84    1.33 
  -5 -25   3    6.59    0.92 
   5 -25  -3    6.59    1.20 
   5 -25   3    8.67    0.95 
  -5 -25  -3    8.05    1.34 
   5 -25   3    5.93    0.97 
  -5  25   3    6.91    1.17 
   5  25  -3    6.55    1.39 
   5 -25   3    5.89    1.16 
  -5  25  -5    0.45    1.12 
  -5 -25   5    0.69    0.88 
  -5 -25   5    0.21    0.69 
   5  25   5   -0.44    0.76 
   5 -25  -5   -0.32    0.82 
   5 -25   5    0.14    0.75 
   5 -25   5   -0.22    0.85 
  -5  25   5   -0.07    0.92 
  -5 -25  -5   -0.58    0.85 
   5  25  -5   -0.11    1.16 
  -5  25  -7    0.77    1.35 
  -5 -25   7    1.40    0.94 
  -5 -25   7    0.26    0.96 
   5 -25  -7    2.58    1.09 
   5  25   7    0.62    1.16 
  -5  25   7    0.54    1.29 
   5 -25   7   -0.09    0.99 
   5 -25   7    1.35    1.23 
  -5 -25  -7   -0.70    0.99 
   5  25  -7    0.37    1.24 
  -5 -26   0    0.93    0.77 
  -5  26   0    0.96    0.87 
   5 -26   0   -0.94    0.63 
   5 -26   0    0.47    0.46 
  -5 -26   0   -0.41    0.46 
   5  26   0    0.11    0.84 
   5 -26   0    1.33    0.75 
  -5 -26   2    7.63    1.11 
  -5  26  -2    5.79    1.32 
   5 -26  -2    7.35    1.23 
  -5 -26   2    6.45    0.82 
  -5 -26   2    6.24    1.00 
   5  26   2    8.99    1.32 
  -5 -26  -2   10.34    1.38 
   5 -26   2    8.69    1.25 
   5 -26   2    9.82    1.11 
  -5  26   2    6.91    1.16 
   5  26  -2    7.01    1.37 
   5 -26   2    7.89    0.99 
  -5 -26   4    2.20    0.91 
  -5 -26   4    2.65    0.77 
  -5  26  -4    0.92    1.15 
   5 -26  -4    0.41    0.83 
   5  26   4    2.11    1.00 
  -5  26   4    2.05    0.96 
   5 -26   4    2.24    0.79 
  -5 -26  -4    2.21    1.07 
   5  26  -4    2.15    1.22 
   5 -26   4    1.89    0.98 
  -5 -26   6    0.65    0.77 
  -5 -26   6    1.25    1.03 
  -5  26  -6   -0.15    1.31 
   5  26   6    2.03    1.18 
   5 -26  -6    1.85    1.02 
   5 -26   6    1.19    1.07 
  -5 -26  -6    1.28    1.10 
   5 -26   6    1.68    1.00 
   5  26  -6    3.21    1.44 
  -5  26   6    2.61    1.34 
  -5 -27   1   12.67    1.29 
   5  27   1   12.53    1.53 
  -5  27  -1   11.98    1.56 
   5 -27  -1   13.31    1.31 
   5 -27  -1    9.64    1.35 
  -5 -27   1   13.44    1.42 
  -5 -27   1   10.69    0.83 
   5  27  -1   11.12    1.56 
   5 -27   1   12.24    1.37 
   5 -27   1   10.79    1.03 
   5 -27   1   11.35    1.29 
  -5  27   1   12.55    1.45 
  -5 -27  -1   14.88    1.59 
  -5 -27  -1   12.01    1.04 
  -5  27  -3   -0.27    1.07 
   5  27   3    1.53    0.83 
  -5 -27   3    0.04    0.59 
  -5 -27   3    0.49    0.74 
  -5 -27   3    1.69    0.64 
   5 -27  -3    1.36    0.87 
  -5 -27  -3    0.75    0.97 
   5 -27   3    0.33    0.62 
  -5  27   3   -0.39    0.76 
   5 -27   3    1.93    0.94 
   5 -27   3    2.56    0.73 
   5  27  -3   -0.45    1.00 
  -5 -27   5    6.90    1.41 
  -5  27  -5    4.23    1.50 
  -5 -27   5    7.75    1.21 
   5 -27  -5    6.53    1.36 
   5  27   5    5.36    1.31 
   5 -27   5    7.70    1.47 
   5 -27   5    7.85    1.33 
   5  27  -5    5.78    1.52 
  -5 -27  -5    8.25    1.55 
  -5  27   5    4.92    1.34 
  -5  27  -7    0.69    1.61 
  -5 -27   7    0.30    0.85 
   5  27   7    0.46    1.29 
   5 -27  -7    2.11    1.13 
  -5 -27   7    1.92    1.12 
   5  27  -7   -0.44    1.34 
  -5 -27  -7    2.06    1.22 
   5 -27   7    0.64    1.12 
  -5  27   7    0.10    1.24 
   5 -27   7    1.41    1.18 
  -5 -28   0   29.18    1.60 
  -5  28   0   26.90    1.95 
   5 -28   0   27.20    1.85 
   5 -28   0   23.64    1.73 
   5  28   0   27.06    1.98 
  -5 -28   0   27.04    1.93 
  -5 -28   2    1.17    0.74 
   5 -28  -2    0.89    0.85 
  -5 -28   2    2.89    0.89 
   5 -28  -2    1.92    0.80 
  -5 -28   2    2.22    0.59 
   5  28   2    1.31    0.81 
  -5  28  -2    0.93    1.09 
  -5  28   2    1.83    0.89 
   5 -28   2    3.06    0.84 
  -5 -28  -2    1.60    0.94 
   5  28  -2    1.07    1.05 
   5 -28   2    1.00    0.87 
   5 -28   2    0.96    0.65 
   5  28   4    0.56    0.98 
  -5 -28   4    0.87    0.70 
   5 -28  -4    0.64    0.90 
  -5  28  -4    1.28    1.21 
  -5 -28   4    0.16    0.79 
   5  28  -4   -0.30    1.13 
  -5  28   4   -0.58    0.88 
   5 -28   4    0.79    0.70 
   5 -28   4   -1.03    0.79 
  -5 -28  -4    1.99    1.05 
  -5 -28   6    5.02    1.42 
   5  28   6    6.28    1.58 
  -5  28  -6    6.19    1.77 
  -5 -28   6    6.41    1.24 
   5 -28  -6    4.80    1.28 
   5  28  -6    4.13    1.57 
   5 -28   6    5.72    1.30 
  -5  28   6    5.99    1.74 
   5 -28   6    7.94    1.69 
  -5 -28  -6    5.14    1.37 
   5 -29  -1    6.93    1.24 
  -5 -29   1    4.62    0.91 
   5  29   1    4.89    1.12 
  -5 -29   1    6.37    1.16 
  -5  29  -1    7.49    1.45 
   5 -29  -1    5.61    1.00 
  -5 -29  -1    7.38    1.31 
   5 -29   1    6.57    1.08 
   5  29  -1    5.16    1.34 
   5 -29   1    5.99    1.09 
  -5  29   1    4.60    1.10 
   5 -29   1    7.11    0.90 
  -5 -29  -1    6.12    0.86 
   5 -29  -3    4.89    1.16 
  -5 -29   3    3.69    1.00 
  -5 -29   3    4.18    0.86 
  -5 -29   3    4.76    0.84 
  -5  29  -3    4.47    1.41 
   5  29   3    5.36    1.23 
   5  29  -3    2.80    1.26 
   5 -29   3    3.80    1.12 
  -5 -29  -3    5.21    1.30 
   5 -29   3    6.74    0.98 
  -5  29   3    5.71    1.30 
   5 -29   3    6.14    1.04 
   5  29   5    6.60    1.55 
   5 -29  -5    3.85    1.22 
  -5 -29   5    1.41    0.84 
  -5  29  -5    6.02    1.70 
  -5 -29   5    2.49    1.06 
  -5  29   5    6.45    1.58 
   5 -29   5    3.78    1.07 
   5  29  -5    5.22    1.53 
   5 -29   5    2.67    1.21 
  -5 -29  -5    3.04    1.25 
  -5  30   0    9.30    1.46 
   5 -30   0    7.13    1.20 
  -5 -30   0    8.22    1.06 
   5  30   0    6.90    1.36 
  -5 -30   0    8.27    1.37 
   5 -30   0    8.88    1.22 
  -5 -30   2    3.09    0.90 
   5 -30  -2    6.23    1.22 
  -5 -30   2    3.08    0.89 
   5 -30  -2    3.56    0.89 
   5  30   2    3.77    1.05 
  -5  30  -2    5.09    1.45 
   5 -30   2    4.52    0.96 
   5 -30   2    5.81    0.94 
  -5  30   2    4.39    1.08 
   5  30  -2    3.33    1.26 
   5 -30   2    1.94    0.94 
  -5 -30  -2    5.22    1.24 
  -5 -30   4    7.73    1.12 
   5  30   4    8.11    1.51 
  -5  30  -4    6.45    1.66 
   5 -30  -4    8.74    1.52 
  -5 -30   4    7.98    1.36 
  -5  30   4    8.13    1.53 
   5 -30   4    4.59    1.18 
   5 -30   4    7.65    1.23 
  -5 -30  -4    7.38    1.50 
   5  30  -4    8.63    1.70 
  -5 -30   6    1.64    0.94 
   5  30   6   -0.07    1.15 
  -5  30  -6    1.75    1.55 
   5 -30  -6    2.69    1.16 
  -5 -30   6    1.10    1.12 
  -5  30   6    0.83    1.28 
   5 -30   6    0.61    1.08 
   5 -30   6    2.37    1.15 
   5  30  -6    3.56    1.67 
  -5 -30  -6    0.34    1.07 
   5  31   1    2.57    1.02 
  -5 -31   1    3.92    1.11 
   5 -31  -1    2.80    0.90 
  -5 -31   1    4.17    0.91 
   5 -31  -1    5.64    1.19 
  -5  31  -1    2.31    1.26 
   5  31  -1    4.52    1.37 
  -5  31   1    3.00    1.10 
   5 -31   1    6.39    1.18 
  -5 -31  -1    3.48    1.09 
   5 -31   1    1.94    0.94 
  -5 -31   3   12.81    1.46 
   5  31   3    9.96    1.56 
   5 -31  -3    8.64    1.49 
  -5 -31   3   13.17    1.22 
  -5  31  -3   11.54    1.91 
  -5 -31   3    9.43    1.37 
  -5 -31  -3   14.55    1.87 
   5 -31   3   10.47    1.29 
  -5  31   3   11.70    1.77 
   5 -31   3   13.04    1.76 
   5  31  -3   13.59    1.97 
   5 -31   3   10.38    1.53 
   5  31   5    3.12    1.30 
   5 -31  -5    3.06    1.19 
  -5  31  -5    2.74    1.57 
  -5 -31   5    3.37    1.22 
  -5 -31   5    3.57    1.00 
  -5 -31  -5    3.36    1.30 
   5  31  -5    2.72    1.49 
  -5  31   5    3.61    1.49 
   5 -31   5    3.02    1.04 
   5 -31   5    1.17    1.15 
   5 -32   0    3.55    1.03 
   5 -32   0    2.61    0.97 
  -5  32   0    2.15    1.17 
   5  32   0    3.29    1.21 
  -5 -32   0    3.36    1.18 
  -5 -32   0    3.98    0.85 
  -5  32  -2   -0.77    1.14 
   5 -32  -2   -0.84    0.66 
   5  32   2   -0.28    0.84 
   5 -32  -2    1.08    0.96 
  -5 -32   2   -0.59    0.77 
  -5 -32   2    0.06    0.68 
  -5  32   2   -0.87    0.89 
   5 -32   2    0.86    0.71 
   5 -32   2    0.43    0.75 
   5 -32   2    0.60    0.88 
  -5 -32  -2    0.39    0.96 
   5  32  -2   -0.16    1.01 
  -5 -32   4   10.91    1.60 
   5 -32  -4    8.47    1.56 
   5  32   4    8.57    1.66 
  -5 -32   4   11.83    1.33 
  -5  32  -4    7.77    1.81 
   5  32  -4   10.34    2.03 
  -5  32   4   12.07    1.87 
   5 -32   4   11.35    1.42 
  -5 -32  -4   10.85    1.69 
   5 -32   4   11.58    1.74 
  -5 -33   1    6.90    1.33 
   5 -33  -1    5.81    1.11 
   5  33   1    3.94    1.20 
  -5  33  -1    5.61    1.54 
   5 -33  -1    6.88    1.37 
  -5 -33   1    4.94    1.01 
   5  33  -1    4.99    1.42 
  -5  33   1    6.73    1.41 
   5 -33   1    5.02    1.15 
   5 -33   1    6.20    1.16 
  -5 -33  -1    6.40    1.37 
   5  33   3    6.42    1.46 
   5 -33  -3    3.94    1.24 
  -5  33  -3    6.77    1.87 
  -5 -33   3    6.06    1.25 
  -5  33   3    5.03    1.40 
   5  33  -3    5.35    1.66 
   5 -33   3    3.24    1.20 
   5 -33   3    6.64    1.09 
  -5 -33  -3    2.94    1.25 
  -5 -33   5    0.34    1.04 
   5 -33  -5    1.54    1.13 
  -5 -33   5    0.78    0.75 
   5  33   5    0.42    1.16 
  -5  33  -5    0.64    1.56 
   5 -33   5   -1.13    0.92 
  -5  33   5    0.37    1.23 
   5  33  -5   -1.89    1.35 
   5 -33   5   -0.39    0.76 
  -5 -33  -5   -0.56    1.05 
   5  34   0   -0.49    0.91 
  -5 -34   0    0.26    0.60 
   5 -34   0   -1.54    0.77 
  -5 -34   0    0.67    1.04 
   5 -34   0    0.22    0.79 
  -5  34   0   -0.79    1.06 
   5  34   2    1.66    1.10 
  -5 -34   2    1.82    0.88 
   5 -34  -2    1.91    1.17 
  -5  34  -2    1.46    1.42 
  -5 -34   2    1.48    0.94 
   5 -34   2    2.23    0.95 
   5 -34   2    1.12    0.99 
  -5  34   2    1.78    1.26 
  -5 -34  -2    0.30    1.12 
   5  34  -2    1.47    1.33 
   5 -34  -4    2.36    1.24 
   5  34   4    3.50    1.37 
  -5  34  -4    3.20    1.76 
  -5 -34   4    1.81    1.02 
   5  34  -4    0.79    1.43 
  -5 -34  -4    1.70    1.24 
  -5  34   4    2.15    1.37 
   5 -34   4    2.16    1.24 
   5 -34   4    1.15    0.81 
   5  35   1    0.65    1.04 
  -5 -35   1    1.02    1.02 
   5 -35  -1    0.51    1.03 
   5 -35  -1   -0.62    0.75 
  -5  35  -1    0.08    1.27 
  -5 -35   1    0.18    0.67 
   5  35  -1   -0.46    1.11 
  -5 -35  -1    0.05    1.07 
   5 -35   1    2.10    0.96 
   5 -35   1   -0.40    0.79 
  -5  35   1   -0.74    1.00 
   5 -35  -3    1.77    1.10 
  -5 -35   3    1.26    0.95 
   5  35   3    0.67    1.21 
  -5  35  -3   -0.56    1.50 
  -5 -35  -3    2.31    1.27 
   5  35  -3   -0.66    1.28 
  -5  35   3    0.83    1.19 
   5 -35   3    1.43    1.07 
   5 -36   0    0.72    0.97 
  -5  36   0   -0.80    1.15 
  -5 -36   0   -0.49    0.99 
   5 -36   0   -0.20    0.82 
   5  36   0    0.51    1.06 
  -5 -36   2    1.31    0.90 
   5  36   2    1.86    1.22 
  -5  36  -2    1.52    1.57 
   5 -36  -2    3.76    1.31 
  -5 -36   2    4.52    1.18 
   5  36  -2   -0.08    1.33 
   5 -36   2    2.88    1.05 
   5 -36   2    1.13    1.01 
  -5  36   2    1.21    1.27 
  -5 -36  -2    0.44    1.15 
   5  36   4    4.72    1.56 
  -5 -36   4    5.88    1.35 
   5 -36  -4    6.45    1.52 
  -5  36  -4    2.17    1.80 
  -5  36   4    4.35    1.59 
  -5 -36  -4    4.97    1.58 
   5  36  -4    1.77    1.61 
   5 -36   4    5.13    1.47 
   5  37   1    9.89    1.75 
  -5 -37   1   11.18    1.47 
   5 -37  -1   11.19    1.49 
  -5 -37   1   12.19    1.80 
  -5  37  -1   14.08    2.16 
   5 -37  -1   13.89    1.83 
  -5 -37  -1   14.04    1.94 
  -5  37   1   15.52    2.13 
   5 -37   1   14.11    1.77 
   5 -37   1    9.97    1.52 
   5  37  -1   13.54    2.20 
   5  37   3    0.53    1.22 
  -5  37  -3    0.92    1.62 
   5 -37  -3    0.72    1.13 
  -5 -37   3    1.24    0.89 
  -5  37   3   -0.76    1.16 
   5  37  -3    0.44    1.46 
   5 -37   3   -0.54    0.90 
  -5 -37  -3    2.99    1.36 
   5 -38   0    1.60    0.94 
  -5 -38   0    1.01    1.20 
   5  38   0    2.34    1.34 
  -5  38   0    2.79    1.40 
   5 -38   0    2.23    1.16 
   5 -38  -2    3.45    1.36 
  -5 -38   2    3.49    1.23 
  -5  38  -2    1.65    1.73 
  -5 -38   2    1.02    0.83 
   5  38   2    1.65    1.30 
   5 -38   2    3.61    1.34 
  -5  38   2    1.28    1.29 
   5 -38   2    2.11    1.08 
   5  38  -2    0.10    1.44 
  -5 -38  -2    3.00    1.39 
   5  39   1   -0.79    1.15 
  -5 -39   1   -0.54    1.07 
   5 -39  -1    0.73    1.10 
  -5  39  -1   -1.04    1.53 
   5  39  -1   -1.11    1.26 
   5 -39   1    1.48    1.14 
  -5  39   1   -0.57    1.20 
  -5 -39  -1    1.42    1.27 
   5 -39   1    1.17    0.96 
  -6   0   0  427.74    8.89 
   6   0   0  427.30    8.86 
  -6   0   0  438.79    9.02 
   6   0   2   73.08    2.15 
   6   0  -2   76.21    2.09 
   6   0   2   75.53    2.00 
  -6   0  -2   74.25    1.97 
  -6   0   2   73.85    1.99 
  -6   0   2   73.71    2.08 
  -6   0   2   71.77    1.96 
  -6   0   4   59.95    2.00 
   6   0   4   58.03    1.80 
   6   0   4   62.03    2.03 
  -6   0  -4   57.38    1.74 
   6   0  -4   57.87    2.22 
  -6   0   4   56.00    1.99 
   6   0   4   58.81    2.30 
  -6   0   4   59.69    1.73 
   6   0   6   25.99    1.37 
   6   0  -6   27.03    1.90 
  -6   0   6   24.68    1.53 
   6   0  -6   22.85    1.11 
  -6   0   6   24.77    1.54 
  -6   0  -6   25.55    1.16 
   6   0   6   25.36    1.60 
  -6   0  -6   23.37    1.84 
   6   0  -8    2.23    1.17 
  -6   0   8    1.69    0.83 
  -6   0  -8    1.40    1.18 
   6   0   8    2.30    0.98 
  -6   0   8    3.11    1.03 
   6   0   8    1.93    0.75 
  -6  -1   1  349.14    7.53 
   6   1   1  364.38    7.42 
  -6  -1   1  352.63    7.45 
   6   1   1  348.77    7.45 
  -6  -1   1  361.00    7.54 
  -6   1  -1  372.68    7.55 
  -6   1   1  347.86    7.43 
  -6   1   1  364.30    7.57 
  -6  -1  -1  364.10    7.57 
   6  -1   1  355.89    7.44 
   6   1  -1  349.22    7.33 
   6  -1   1  370.92    7.47 
  -6   1   1  338.25    7.50 
  -6  -1   3   23.19    0.97 
   6   1   3   22.86    0.95 
  -6  -1   3   20.86    1.11 
  -6  -1   3   23.26    1.19 
  -6   1  -3   23.97    0.97 
   6   1   3   25.54    1.38 
   6   1   3   24.12    1.12 
   6  -1   3   22.07    1.31 
   6  -1   3   24.50    1.15 
  -6   1   3   22.03    1.26 
  -6  -1  -3   24.39    1.06 
  -6   1   3   25.32    1.12 
  -6   1   3   23.65    1.01 
   6   1  -3   22.09    1.28 
   6  -1   3   23.51    1.03 
  -6   1   3   23.35    1.17 
  -6  -1   5    8.69    0.99 
  -6  -1   5    9.07    1.01 
   6   1   5    7.72    1.16 
  -6   1  -5    7.93    0.71 
  -6  -1   5    7.71    0.69 
   6  -1  -5   10.34    1.30 
   6   1   5    8.55    0.81 
   6   1   5    8.50    0.94 
  -6   1  -5    7.54    1.15 
   6  -1   5    9.10    0.88 
  -6   1   5    7.41    0.90 
   6   1  -5    8.28    1.13 
  -6   1   5    9.97    0.79 
  -6  -1  -5    6.78    0.73 
  -6   1   5    9.99    1.00 
   6  -1   5    8.89    1.01 
   6   1   7    2.87    0.69 
   6   1   7    2.73    0.88 
   6  -1  -7    2.61    1.12 
  -6  -1   7    3.64    0.86 
  -6  -1   7    3.46    0.90 
  -6   1  -7    2.50    1.09 
   6  -1   7    2.92    0.77 
  -6  -1  -7    2.42    1.08 
   6   1  -7    3.51    1.20 
  -6   1   7    2.91    0.84 
   6  -1   7    3.13    0.95 
  -6   1   7    2.96    0.83 
   6  -1  -9    3.51    1.23 
  -6   1  -9    2.24    1.26 
  -6  -1   9    0.88    0.89 
   6   1   9    1.03    0.94 
  -6  -1   9    0.70    0.93 
   6  -1   9    0.68    0.94 
  -6   1   9   -0.20    0.73 
  -6  -1  -9    3.60    1.27 
   6   1  -9    2.31    1.15 
  -6   1   9    1.25    0.93 
  -6   2   0    2.88    0.50 
  -6  -2   0    3.40    0.51 
   6  -2   0    2.09    0.37 
  -6  -2   0    1.55    0.36 
   6   2   0    1.42    0.31 
  -6  -2   2   19.26    1.02 
  -6   2  -2   18.71    0.88 
  -6  -2   2   18.70    0.93 
   6   2   2   19.03    1.09 
  -6   2  -2   17.76    1.04 
   6   2   2   18.52    0.87 
  -6  -2   2   18.26    0.84 
  -6  -2  -2   19.77    0.97 
  -6   2   2   18.88    0.99 
  -6   2   2   21.49    0.99 
   6   2  -2   17.64    1.00 
  -6   2   2   18.89    0.94 
   6  -2   2   20.29    0.97 
  -6   2   2   19.88    0.88 
   6   2   4    1.43    0.53 
  -6   2  -4   -0.39    0.62 
  -6  -2   4    1.20    0.37 
  -6  -2   4    0.45    0.50 
  -6  -2   4    1.39    0.58 
   6   2   4    1.53    0.42 
  -6   2  -4    1.38    0.41 
   6   2   4    1.93    0.71 
   6  -2   4    1.65    0.51 
  -6   2   4    0.51    0.49 
   6  -2   4    1.55    0.54 
  -6   2   4    0.80    0.67 
   6   2  -4    0.51    0.67 
  -6   2   4    1.78    0.44 
  -6   2   4    1.48    0.53 
  -6  -2  -4    1.76    0.52 
   6  -2  -6    4.73    0.69 
   6   2   6    4.55    0.69 
   6   2   6    3.70    1.02 
  -6   2  -6    5.55    1.18 
  -6  -2   6    5.34    0.91 
  -6  -2   6    4.04    0.85 
  -6   2  -6    4.94    0.59 
   6   2   6    4.65    0.87 
   6  -2  -6    5.27    1.17 
  -6   2   6    4.52    0.82 
   6   2  -6    5.28    1.18 
   6  -2   6    5.31    0.99 
  -6  -2  -6    5.18    0.74 
   6  -2   6    4.86    0.84 
   6   2  -6    4.89    0.57 
  -6   2   6    4.21    0.83 
  -6  -2   8    0.50    0.83 
   6  -2  -8    2.45    1.18 
  -6   2  -8    2.52    1.25 
  -6  -2   8    1.98    0.89 
   6   2   8   -0.02    0.81 
   6  -2   8    0.74    0.86 
  -6   2   8    1.18    0.81 
  -6  -2  -8    1.92    1.18 
  -6   2   8    0.99    0.74 
   6   2  -8    3.00    1.16 
   6  -2   8    1.28    0.75 
  -6   3  -1   40.61    1.21 
  -6   3  -1   44.28    1.34 
   6  -3  -1   41.32    1.22 
  -6  -3   1   42.17    1.25 
   6   3   1   41.57    1.26 
   6   3   1   41.11    1.15 
  -6  -3   1   42.63    1.31 
  -6  -3   1   41.94    1.35 
  -6   3   1   43.68    1.41 
   6   3  -1   41.75    1.16 
  -6   3   1   40.72    1.15 
   6  -3   1   42.95    1.30 
  -6   3   1   41.96    1.30 
  -6  -3  -1   41.60    1.38 
  -6  -3   3   64.90    1.75 
   6   3   3   69.48    2.27 
   6   3   3   67.24    1.68 
   6   3   3   65.35    1.91 
  -6  -3   3   67.00    2.06 
  -6  -3   3   66.44    2.10 
  -6   3  -3   63.43    2.18 
  -6   3  -3   63.84    1.76 
  -6   3   3   65.40    1.99 
   6  -3   3   66.55    1.94 
  -6   3   3   65.00    1.93 
   6  -3   3   66.76    2.05 
  -6   3   3   68.56    1.94 
  -6  -3  -3   68.09    1.96 
  -6   3   3   64.02    2.15 
   6   3  -3   65.56    2.14 
   6   3   5    9.91    1.33 
   6   3   5    7.93    0.91 
   6   3   5   10.07    0.81 
  -6   3  -5   11.64    1.38 
  -6  -3   5    9.81    0.66 
  -6  -3   5   12.01    1.15 
  -6  -3   5    7.92    0.95 
  -6   3  -5    9.50    0.70 
  -6   3   5   10.61    1.27 
  -6   3   5    9.24    0.86 
   6   3  -5   12.15    1.37 
   6  -3   5   11.23    1.04 
  -6   3   5   10.82    1.03 
  -6   3   5   10.73    1.03 
   6  -3   5    9.25    1.05 
  -6  -3  -5    8.01    0.84 
   6   3   7    0.49    0.52 
   6  -3  -7    0.12    0.93 
   6  -3  -7    0.16    0.66 
  -6  -3   7    0.82    0.72 
  -6  -3   7    0.15    0.70 
   6   3   7    1.37    0.75 
  -6   3  -7    0.61    0.98 
   6  -3   7    0.28    0.73 
  -6   3   7   -0.10    0.66 
   6  -3   7   -0.63    0.60 
   6   3  -7   -0.56    0.88 
  -6   3   7    0.27    0.62 
  -6   3  -9    4.35    1.52 
   6  -3  -9    6.73    1.53 
   6   3   9    2.69    1.12 
  -6  -3   9    1.70    0.96 
  -6  -3   9    2.35    1.00 
   6  -3   9    2.74    1.14 
  -6   3   9    2.55    0.91 
   6   3  -9    5.13    1.40 
  -6   3   9    2.13    0.99 
  -6  -3  -9    4.23    1.35 
  -6  -4   0   21.15    0.95 
  -6   4   0   21.27    0.95 
  -6  -4   0   21.23    0.81 
   6  -4   0   20.55    0.82 
   6   4   0   18.92    0.81 
   6   4   0   16.50    0.76 
  -6   4  -2    4.95    0.53 
  -6  -4   2    5.85    0.54 
  -6  -4   2    5.66    0.65 
  -6  -4   2    6.77    0.67 
   6   4   2    5.32    0.72 
   6   4   2    5.62    0.51 
  -6   4  -2    6.84    0.74 
  -6   4   2    5.45    0.65 
  -6   4   2    5.62    0.53 
  -6  -4  -2    5.76    0.65 
  -6   4   2    4.37    0.56 
   6   4  -2    5.21    0.65 
   6  -4   2    6.84    0.69 
  -6   4   2    5.75    0.66 
  -6  -4   4   88.73    2.78 
   6   4   4   89.26    2.25 
  -6   4  -4   88.12    2.90 
   6   4   4   89.22    2.57 
   6   4   4   90.69    2.99 
  -6  -4   4   92.60    2.75 
  -6   4  -4   88.04    2.24 
  -6  -4   4   90.60    2.23 
  -6  -4  -4   91.26    2.58 
   6   4  -4   88.90    2.85 
   6  -4   4   91.62    2.78 
  -6   4   4   90.83    2.61 
  -6   4   4   95.05    2.58 
  -6   4   4   96.68    2.59 
  -6   4   4   94.87    2.94 
   6  -4   4   92.60    2.63 
   6   4   6   14.01    0.94 
   6  -4  -6   13.76    1.05 
  -6   4  -6    9.68    1.33 
  -6  -4   6   11.84    1.23 
   6   4   6   12.57    1.56 
  -6  -4   6   13.61    1.35 
   6   4   6   15.50    1.28 
   6   4  -6   12.48    1.56 
   6  -4   6   14.66    1.29 
  -6   4   6   11.75    1.18 
  -6   4   6   11.35    1.11 
  -6  -4  -6   10.70    1.03 
  -6   4   6   12.14    1.48 
   6  -4   6   10.97    1.22 
   6  -4  -8    1.78    1.13 
  -6  -4   8    0.86    0.77 
   6   4   8    1.18    0.79 
  -6  -4   8    0.09    0.83 
  -6   4  -8    1.13    1.04 
  -6   4   8    1.58    0.78 
  -6   4   8   -0.30    0.72 
   6  -4   8    1.40    0.86 
   6  -4   8    0.70    0.86 
  -6  -4  -8    0.41    1.04 
   6   4  -8    1.74    1.10 
  -6   5  -1   82.37    2.08 
  -6   5  -1   78.88    1.93 
  -6  -5   1   77.30    1.99 
   6  -5  -1   80.70    1.95 
   6   5   1   77.57    2.00 
  -6  -5   1   78.77    2.11 
   6   5   1   77.64    1.84 
  -6  -5   1   78.59    2.06 
   6   5  -1   78.37    1.97 
  -6  -5  -1   79.69    2.16 
  -6   5   1   79.69    1.91 
  -6  -5  -1   83.78    1.80 
  -6   5   1   80.35    2.17 
   6  -5   1   77.48    2.02 
  -6  -5   3    6.56    0.75 
  -6   5  -3    4.45    0.75 
  -6  -5   3    6.47    0.55 
  -6   5  -3    6.30    0.57 
  -6  -5   3    5.84    0.74 
   6   5   3    6.44    0.87 
   6   5   3    6.89    0.64 
  -6   5   3    6.24    0.70 
   6  -5   3    6.42    0.73 
  -6   5   3    5.71    0.81 
  -6  -5  -3    6.48    0.74 
  -6   5   3    6.01    0.65 
   6   5  -3    5.60    0.79 
   6  -5   3    5.87    0.68 
  -6   5   3    5.94    0.61 
   6   5   5    4.67    0.75 
  -6  -5   5    4.57    0.87 
  -6   5  -5    4.77    0.98 
  -6  -5   5    3.58    0.77 
   6   5   5    4.95    0.56 
   6   5   5    5.14    1.04 
  -6   5  -5    4.69    0.44 
  -6  -5   5    4.44    0.43 
  -6  -5  -5    5.58    0.79 
  -6   5   5    5.11    0.74 
  -6   5   5    5.84    0.78 
   6  -5   5    5.45    0.92 
   6  -5   5    3.96    0.74 
  -6   5   5    5.32    0.74 
   6   5  -5    4.37    1.01 
  -6   5   5    4.45    1.01 
  -6  -5   7    2.36    0.89 
  -6  -5   7    1.69    0.80 
   6  -5  -7    2.86    0.69 
  -6   5  -7    1.64    1.02 
   6   5   7    1.62    0.76 
   6   5   7    0.43    0.92 
   6  -5   7    3.80    0.88 
   6  -5   7    2.43    0.89 
  -6   5   7    2.47    0.83 
  -6  -5  -7    3.09    0.80 
   6   5  -7    2.30    1.07 
  -6   5   7    1.93    0.75 
  -6   5  -9    3.32    1.36 
  -6  -5   9    2.58    1.11 
   6   5   9    4.22    1.17 
   6  -5  -9    7.70    1.54 
  -6  -5   9    2.81    1.11 
   6  -5   9    3.33    1.07 
  -6   5   9    2.11    0.99 
  -6  -5  -9    3.47    1.38 
   6   5  -9    4.95    1.44 
   6  -5   9    3.73    1.31 
  -6  -6   0   20.04    0.82 
   6  -6   0   17.94    0.80 
  -6  -6   0   17.83    0.95 
  -6  -6   0   18.62    0.69 
  -6   6   0   18.34    0.71 
  -6   6   0   18.35    0.94 
   6   6   0   19.12    0.86 
   6   6   2    2.00    0.37 
  -6   6  -2    2.27    0.44 
   6   6   2    0.65    0.50 
  -6   6  -2    1.26    0.54 
  -6  -6   2    2.11    0.49 
  -6  -6   2    1.80    0.51 
  -6  -6   2    1.65    0.41 
  -6   6   2    1.27    0.36 
   6  -6   2    1.36    0.49 
  -6   6   2    1.46    0.44 
  -6   6   2    1.32    0.51 
   6   6  -2    2.06    0.54 
  -6  -6  -2    1.42    0.54 
  -6   6   2    1.21    0.47 
   6   6   4   71.89    2.62 
  -6  -6   4   72.98    2.45 
   6   6   4   70.26    2.13 
  -6  -6   4   69.89    2.37 
  -6   6  -4   73.93    2.54 
  -6  -6   4   71.12    1.81 
  -6   6  -4   70.46    1.79 
  -6  -6  -4   74.69    2.29 
  -6   6   4   71.88    2.25 
   6   6  -4   71.96    2.46 
  -6   6   4   75.28    2.56 
   6  -6   4   72.21    2.31 
  -6   6   4   69.66    2.17 
  -6   6   4   72.70    2.14 
   6  -6   4   70.98    2.40 
   6   6   6    2.91    0.53 
  -6  -6   6    1.34    0.76 
  -6  -6   6    3.10    0.86 
   6   6   6    2.76    0.73 
   6  -6  -6    1.40    0.61 
  -6   6  -6    0.67    0.90 
   6   6   6    1.33    0.88 
   6  -6   6    1.89    0.79 
  -6   6   6    2.60    0.93 
  -6  -6  -6    2.80    0.76 
   6  -6   6    3.07    0.83 
  -6   6   6    3.08    0.74 
   6   6  -6    2.10    0.98 
  -6   6   6    2.76    0.72 
   6  -6  -8    2.53    1.18 
  -6   6  -8    1.13    1.14 
  -6  -6   8    2.16    0.93 
   6   6   8    1.62    0.80 
  -6  -6   8    0.82    0.87 
   6   6   8    0.43    1.06 
  -6   6   8    1.82    0.80 
  -6   6   8    1.36    0.79 
   6   6  -8    3.84    1.29 
   6  -6   8    0.93    0.83 
   6  -6   8    2.34    1.00 
   6   7   1   38.05    1.02 
  -6   7  -1   39.40    1.31 
  -6  -7   1   36.98    1.31 
   6   7   1   39.64    1.26 
  -6  -7   1   39.54    1.36 
   6  -7  -1   38.03    1.16 
  -6  -7   1   39.07    1.23 
  -6   7  -1   36.71    1.19 
  -6  -7  -1   40.80    1.45 
   6   7  -1   37.34    1.29 
  -6   7   1   38.12    1.42 
  -6  -7  -1   40.35    1.02 
   6  -7   1   39.78    1.32 
  -6   7   1   39.33    1.16 
  -6  -7   3   14.28    1.01 
   6   7   3   15.72    0.81 
  -6   7  -3   15.19    0.73 
  -6  -7   3   14.47    0.71 
  -6  -7   3   15.25    1.11 
  -6   7  -3   14.03    1.14 
   6   7   3   14.67    1.14 
   6  -7   3   15.53    1.06 
   6  -7   3   16.69    1.08 
  -6   7   3   14.06    0.80 
  -6   7   3   14.79    1.03 
   6   7  -3   13.53    1.10 
  -6   7   3   14.65    0.91 
  -6   7   3   14.77    1.11 
  -6  -7  -3   15.89    1.07 
   6   7   5    3.92    0.68 
   6   7   5    5.70    1.07 
  -6  -7   5    3.61    0.79 
  -6  -7   5    3.67    0.85 
   6   7   5    4.51    0.46 
  -6   7  -5    4.97    1.09 
   6  -7   5    5.72    0.87 
   6  -7   5    4.64    0.85 
  -6   7   5    4.42    0.71 
   6   7  -5    5.24    1.08 
  -6  -7  -5    4.67    0.79 
  -6   7   5    3.94    0.95 
  -6   7   5    4.50    0.76 
  -6   7   5    4.20    0.68 
   6  -7  -7    2.34    0.70 
   6   7   7    1.00    0.97 
   6   7   7    0.91    0.69 
  -6  -7   7    1.20    0.87 
  -6   7  -7    2.83    1.16 
  -6  -7   7    0.97    0.80 
  -6   7   7    1.22    1.03 
   6  -7   7    1.76    0.82 
   6  -7   7    0.40    0.78 
  -6   7   7    1.30    0.69 
  -6  -7  -7    1.19    0.71 
  -6   7   7    1.51    0.75 
   6   7  -7    0.15    0.90 
   6  -7  -9    7.56    1.53 
  -6  -7   9    1.52    0.93 
  -6  -7   9    0.19    0.93 
  -6   7  -9    1.90    1.23 
   6   7   9    2.23    0.84 
   6  -7   9   -0.83    0.90 
   6  -7   9    1.65    1.00 
   6   7  -9    2.79    1.22 
  -6  -7  -9    2.63    1.39 
  -6   7   9    0.87    0.87 
  -6  -8   0    8.27    0.51 
   6   8   0    8.82    0.75 
   6  -8   0    9.76    0.67 
  -6  -8   0    8.75    0.80 
  -6   8   0    9.76    0.64 
  -6   8   0    8.50    0.81 
  -6  -8   0    8.75    0.67 
  -6   8  -2    1.43    0.40 
  -6   8  -2    1.81    0.54 
   6   8   2    1.28    0.51 
   6   8   2    2.11    0.35 
  -6  -8   2    0.97    0.40 
  -6  -8   2    1.42    0.47 
  -6  -8   2    1.31    0.53 
   6  -8  -2    1.11    0.40 
   6  -8   2    2.30    0.53 
  -6   8   2    1.25    0.48 
  -6  -8  -2    1.30    0.59 
   6   8  -2    0.88    0.55 
  -6   8   2    1.33    0.53 
   6   8   4   14.26    1.29 
   6   8   4   14.54    0.88 
  -6  -8   4   14.27    1.12 
  -6   8  -4   12.09    0.59 
  -6  -8   4   13.23    1.18 
  -6  -8   4   11.51    0.59 
  -6   8  -4   12.64    1.28 
   6  -8   4   14.19    1.16 
  -6   8   4   13.54    0.88 
  -6   8   4   11.65    0.93 
  -6   8   4   15.32    1.13 
   6   8  -4   14.41    1.27 
   6  -8   4   14.06    1.17 
  -6   8   4   13.18    1.26 
  -6  -8  -4   11.32    1.09 
   6  -8  -6    5.07    0.86 
  -6  -8   6    3.69    0.92 
   6   8   6    3.15    1.01 
   6   8   6    4.82    0.82 
  -6   8  -6    3.95    1.12 
  -6  -8   6    2.64    0.83 
   6  -8   6    3.72    0.90 
   6  -8   6    3.49    0.88 
   6   8  -6    5.13    1.19 
  -6  -8  -6    2.69    0.80 
  -6   8   6    3.73    1.05 
  -6   8   6    4.58    0.84 
  -6   8   6    3.10    0.72 
  -6  -8   8    0.93    0.89 
  -6   8  -8    2.99    1.27 
   6   8   8    3.03    1.34 
  -6  -8   8    0.95    0.84 
   6   8   8    3.09    0.96 
   6  -8   8    1.10    0.91 
   6  -8   8    1.07    1.04 
  -6   8   8    1.55    0.77 
  -6   8   8    3.06    0.92 
   6   8  -8    2.97    1.22 
  -6  -9   1    1.23    0.47 
   6   9   1    1.86    0.47 
  -6  -9   1    0.94    0.45 
   6   9   1    1.12    0.24 
  -6  -9   1    1.91    0.43 
   6  -9  -1    0.81    0.39 
  -6   9  -1    1.10    0.49 
  -6   9  -1    1.47    0.45 
  -6  -9  -1    1.05    0.29 
  -6   9   1    0.90    0.38 
  -6   9   1    0.27    0.51 
   6   9  -1    0.68    0.48 
   6  -9   1    1.29    0.47 
  -6  -9  -1    2.40    0.62 
  -6  -9   3    3.49    0.63 
   6   9   3    2.71    0.66 
   6   9   3    3.43    0.43 
  -6  -9   3    3.56    0.68 
  -6   9  -3    3.28    0.43 
  -6  -9   3    3.04    0.43 
  -6   9  -3    1.83    0.66 
  -6   9   3    2.59    0.68 
  -6   9   3    4.16    0.74 
  -6   9   3    2.67    0.54 
  -6   9   3    2.76    0.46 
  -6  -9  -3    3.27    0.72 
   6   9  -3    4.53    0.76 
   6  -9   3    1.89    0.57 
   6  -9   3    2.21    0.62 
   6   9   5    2.25    0.85 
  -6   9  -5    2.38    0.93 
  -6  -9   5    1.09    0.67 
   6  -9  -5    1.26    0.61 
  -6  -9   5    1.61    0.72 
   6   9   5    1.55    0.54 
   6  -9   5    1.63    0.71 
   6   9  -5    2.05    0.88 
  -6  -9  -5    1.93    0.74 
  -6   9   5    1.73    0.57 
  -6   9   5    1.73    0.61 
   6  -9   5    1.32    0.68 
  -6   9   5    1.09    0.78 
  -6  -9   7    8.61    1.31 
  -6  -9   7    5.70    1.12 
  -6   9  -7    8.36    1.56 
   6   9   7    8.09    1.58 
   6   9   7    7.14    1.04 
   6  -9  -7    7.70    1.02 
  -6   9   7    7.52    0.99 
   6  -9   7    7.50    1.21 
  -6  -9  -7    6.75    1.07 
   6  -9   7    8.05    1.25 
  -6   9   7    9.28    1.09 
   6   9  -7    6.01    1.29 
  -6   9   7    9.03    1.61 
  -6   9  -9    1.76    1.29 
   6   9   9   -0.66    1.14 
  -6  -9   9    0.86    0.97 
   6  -9  -9    2.69    1.29 
  -6  -9   9    1.08    0.95 
  -6   9   9    1.41    0.86 
   6   9  -9    3.23    1.31 
   6  -9   9   -0.30    1.00 
   6  -9   9    1.43    1.13 
  -6  10   0   43.98    1.41 
  -6  10   0   46.40    1.61 
  -6 -10   0   48.16    1.65 
  -6 -10   0   44.74    1.22 
  -6 -10   0   44.86    1.40 
   6 -10   0   44.62    1.39 
   6  10   0   44.67    1.55 
  -6 -10   2   16.49    0.91 
  -6  10  -2   17.07    0.87 
  -6 -10   2   16.88    1.10 
   6  10   2   17.26    1.05 
   6 -10  -2   16.39    0.78 
   6  10   2   16.41    0.65 
  -6 -10   2   16.17    0.96 
  -6  10  -2   16.72    1.04 
  -6 -10  -2   17.75    1.17 
  -6  10   2   16.36    1.17 
  -6  10   2   17.71    1.01 
   6  10  -2   16.53    1.08 
   6 -10   2   15.80    1.03 
   6  10   4    8.34    0.71 
   6  10   4    9.79    1.19 
  -6  10  -4    9.00    0.55 
  -6 -10   4    8.34    0.99 
  -6 -10   4    8.56    0.55 
  -6 -10   4    8.69    0.97 
  -6  10  -4    8.91    1.07 
  -6  10   4    9.56    0.86 
  -6  10   4    8.96    0.75 
   6  10  -4    6.55    0.92 
   6 -10   4    9.70    1.01 
   6 -10   4   10.25    1.07 
  -6 -10  -4   12.23    1.13 
  -6  10   4   10.06    1.06 
  -6  10   4   10.62    1.21 
   6  10   6   10.37    1.03 
   6  10   6   12.43    1.56 
   6 -10  -6   11.10    1.17 
  -6 -10   6   12.76    1.41 
  -6 -10   6   12.22    1.34 
  -6  10  -6   12.99    1.61 
   6 -10   6   12.04    1.34 
   6  10  -6   13.30    1.58 
  -6  10   6   11.05    1.11 
  -6  10   6   13.91    1.09 
  -6 -10  -6   15.31    1.36 
   6 -10   6   14.87    1.45 
  -6  10   6   13.97    1.64 
  -6  10  -8    2.11    1.18 
   6  10   8    1.45    1.17 
  -6 -10   8    0.89    0.86 
   6  10   8    1.73    0.78 
  -6 -10   8    1.83    1.02 
  -6  10   8    1.97    0.80 
   6 -10   8    1.98    1.15 
  -6  10   8    1.92    1.29 
   6  10  -8    1.17    1.11 
   6 -10   8    1.46    0.97 
  -6  11  -1   13.13    0.94 
  -6 -11   1   13.71    0.97 
   6 -11  -1   13.99    0.75 
   6  11   1   14.26    0.91 
  -6 -11   1   14.48    0.93 
  -6 -11   1   13.86    0.79 
  -6  11  -1   14.51    0.95 
   6  11  -1   15.09    1.04 
  -6  11   1   15.44    0.84 
  -6 -11  -1   14.09    0.64 
  -6  11   1   13.28    1.04 
  -6 -11  -1   15.98    1.11 
   6 -11   1   15.30    0.95 
  -6 -11   3   28.18    1.37 
  -6  11  -3   29.88    1.06 
  -6  11  -3   27.14    1.39 
  -6 -11   3   28.78    1.09 
   6  11   3   29.31    1.51 
  -6 -11   3   28.24    1.51 
   6  11   3   29.11    0.96 
   6 -11   3   28.66    1.45 
   6  11  -3   28.32    1.45 
   6 -11   3   29.86    1.49 
  -6 -11  -3   29.37    1.51 
  -6  11   3   28.97    1.50 
  -6  11   3   27.90    1.43 
   6 -11  -5   24.68    1.50 
   6  11   5   23.22    1.14 
  -6  11  -5   23.30    1.69 
   6  11   5   21.43    1.71 
  -6 -11   5   22.12    1.52 
  -6 -11   5   20.66    1.59 
  -6  11   5   23.81    1.74 
   6  11  -5   21.81    1.65 
   6 -11   5   22.03    1.54 
  -6  11   5   23.20    1.30 
   6 -11   5   21.49    1.52 
  -6 -11  -5   22.31    1.53 
  -6  11   5   23.88    1.19 
  -6 -11   7   10.63    1.45 
  -6 -11   7    9.83    1.36 
   6  11   7   11.50    1.82 
   6 -11  -7    9.86    1.15 
  -6  11  -7    9.16    1.52 
   6  11   7    9.72    1.07 
   6 -11   7    9.36    1.37 
   6 -11   7   12.22    1.52 
  -6  11   7   10.70    1.64 
  -6  11   7   10.02    1.09 
  -6  11   7   11.59    1.16 
   6  11  -7   10.03    1.50 
  -6 -11  -7    9.31    1.22 
  -6 -11   9    6.39    1.50 
  -6  11  -9   10.86    1.87 
  -6 -11   9    8.28    1.49 
   6  11   9   10.44    2.01 
   6 -11   9   10.97    1.87 
  -6  11   9    9.07    1.30 
   6 -11   9    6.71    1.48 
   6  11  -9    7.35    1.60 
   6  12   0   55.23    1.84 
   6 -12   0   55.75    1.61 
  -6 -12   0   54.26    1.41 
  -6 -12   0   55.55    1.64 
  -6  12   0   55.88    1.89 
  -6  12   0   51.78    1.69 
  -6 -12   0   54.73    1.87 
   6 -12  -2   14.04    0.73 
  -6 -12   2   13.67    1.05 
  -6 -12   2   14.83    0.90 
  -6  12  -2   14.62    0.89 
  -6  12  -2   14.27    1.05 
   6  12   2   14.40    1.00 
  -6 -12   2   13.37    0.92 
  -6  12   2   14.80    1.13 
   6  12  -2   13.40    1.13 
   6 -12   2   14.28    1.11 
  -6  12   2   14.34    0.96 
   6 -12   2   14.88    1.04 
  -6 -12  -2   14.51    1.14 
  -6  12  -4   15.66    1.34 
   6  12   4   16.65    0.82 
  -6  12  -4   16.56    0.72 
  -6 -12   4   16.63    0.73 
  -6 -12   4   16.15    1.25 
   6  12   4   14.46    1.36 
  -6 -12   4   16.62    1.35 
  -6  12   4   16.55    1.35 
   6 -12   4   16.36    1.28 
  -6  12   4   15.19    0.89 
   6 -12   4   18.00    1.38 
  -6  12   4   16.19    1.36 
  -6 -12  -4   14.17    1.33 
   6  12  -4   14.81    1.35 
   6 -12  -6   -0.49    0.63 
  -6 -12   6    0.59    0.76 
   6  12   6    0.16    0.49 
  -6 -12   6    1.12    0.75 
   6  12   6   -0.49    0.76 
  -6  12  -6   -0.19    0.90 
  -6  12   6    0.16    0.80 
  -6  12   6   -1.33    0.52 
   6 -12   6   -0.37    0.68 
  -6 -12  -6    0.35    0.76 
   6  12  -6    1.51    0.94 
  -6  12   6    0.11    0.54 
   6 -12   6   -1.30    0.60 
   6 -12  -8    1.94    0.91 
  -6 -12   8    2.96    1.05 
  -6  12  -8    6.25    1.59 
   6  12   8    3.70    1.43 
  -6 -12   8    2.30    1.10 
  -6  12   8    5.75    1.62 
   6  12  -8    2.07    1.16 
  -6 -12  -8    3.45    1.05 
   6 -12   8    8.29    1.54 
   6 -12   8    4.63    1.28 
  -6  12   8    5.58    1.00 
  -6 -13   1   18.46    1.08 
  -6  13  -1   16.10    1.04 
  -6 -13   1   18.23    0.87 
   6  13   1   17.62    1.02 
   6 -13  -1   16.43    0.84 
  -6 -13   1   17.47    1.05 
  -6  13  -1   17.80    1.10 
  -6 -13  -1   17.79    1.19 
  -6 -13  -1   17.68    0.76 
  -6  13   1   18.13    1.19 
   6  13  -1   17.92    1.20 
   6 -13   1   18.18    1.03 
  -6  13   1   18.28    0.97 
  -6  13  -3    2.02    0.71 
  -6 -13   3    1.12    0.42 
  -6  13  -3    1.93    0.45 
  -6 -13   3    1.82    0.57 
   6 -13  -3    2.63    0.46 
  -6 -13   3    1.90    0.67 
   6  13   3    2.98    0.68 
   6 -13   3    1.37    0.63 
  -6 -13  -3    2.40    0.76 
  -6  13   3    2.59    0.70 
   6  13  -3    2.29    0.71 
  -6  13   3    1.60    0.69 
   6 -13   3    2.46    0.66 
   6 -13  -5    7.01    1.02 
  -6 -13   5    7.39    1.05 
  -6 -13   5    7.62    1.14 
   6  13   5    8.96    1.38 
   6  13   5    7.44    0.73 
  -6  13  -5    7.31    1.14 
   6  13  -5    7.60    1.18 
  -6 -13  -5    9.41    1.17 
  -6  13   5    7.81    0.79 
  -6  13   5    7.60    1.21 
   6 -13   5    8.56    1.18 
   6 -13   5    6.50    1.02 
  -6  13  -7    7.06    1.43 
   6  13   7    7.65    1.52 
  -6 -13   7    5.73    1.24 
   6 -13  -7    5.18    1.00 
  -6 -13   7    6.17    1.22 
  -6  13   7    5.72    1.00 
   6  13  -7    6.43    1.26 
  -6  13   7    7.58    0.94 
   6 -13   7    6.32    1.30 
   6 -13   7    8.19    1.40 
  -6  13   7    9.70    1.62 
  -6 -13  -7    7.35    1.22 
  -6 -13   9    2.35    1.21 
  -6 -13   9   -0.15    0.84 
   6  13   9    3.06    1.55 
  -6  13  -9    3.42    1.43 
  -6  13   9    1.93    1.54 
   6 -13   9    1.06    1.08 
   6  13  -9    0.97    1.14 
   6 -13   9    1.46    1.17 
  -6 -14   0    3.35    0.53 
  -6 -14   0    4.10    0.71 
  -6  14   0    5.35    0.74 
   6 -14   0    3.31    0.54 
  -6 -14   0    4.10    0.40 
   6  14   0    6.09    0.80 
  -6  14   0    3.88    0.72 
   6  14   2    1.16    0.54 
  -6  14  -2    0.81    0.59 
  -6 -14   2    0.36    0.46 
   6 -14  -2    0.62    0.35 
  -6 -14   2    0.75    0.44 
  -6 -14   2   -0.46    0.46 
  -6  14  -2    0.10    0.43 
   6 -14   2    0.29    0.55 
  -6  14   2    0.52    0.48 
   6  14  -2    0.43    0.60 
   6 -14   2    0.40    0.48 
  -6  14   2    0.20    0.58 
  -6 -14  -2    0.07    0.60 
  -6 -14   4    4.60    0.50 
  -6 -14   4    5.18    0.92 
  -6 -14   4    5.21    0.88 
   6  14   4    4.90    0.93 
  -6  14  -4    6.06    1.04 
   6 -14  -4    4.40    0.90 
   6 -14   4    5.90    0.95 
  -6 -14  -4    5.04    0.97 
   6  14  -4    4.43    0.99 
   6 -14   4    5.39    0.92 
  -6  14   4    5.30    1.00 
   6  14   6    4.44    0.66 
  -6 -14   6    3.00    0.90 
   6  14   6    2.84    1.07 
  -6 -14   6    2.43    0.95 
  -6  14  -6    2.42    1.04 
   6 -14  -6    2.25    0.85 
   6 -14   6    2.97    0.97 
  -6  14   6    4.40    0.74 
  -6  14   6    3.61    1.12 
  -6 -14  -6    3.57    0.97 
   6  14  -6    4.38    1.20 
   6 -14   6    3.99    1.04 
  -6  14  -8   12.91    1.78 
  -6 -14   8   15.62    1.85 
   6 -14  -8   12.48    1.53 
   6  14   8   15.02    2.10 
  -6 -14   8   13.48    1.83 
   6  14  -8   18.02    1.96 
  -6  14   8   20.43    2.49 
   6 -14   8   15.30    1.92 
  -6 -14  -8   15.83    1.70 
   6 -14   8   14.61    1.93 
  -6 -15   1    2.06    0.56 
  -6  15  -1    1.76    0.66 
  -6 -15   1    2.73    0.47 
  -6 -15   1    2.64    0.61 
   6 -15  -1    2.25    0.48 
  -6  15  -1    1.74    0.60 
   6  15   1    2.17    0.58 
  -6  15   1    3.50    0.63 
   6 -15   1    3.65    0.60 
   6  15  -1    2.63    0.72 
  -6 -15  -1    2.39    0.70 
  -6  15   1    2.09    0.67 
  -6 -15  -1    2.55    0.40 
  -6 -15   3   -0.31    0.55 
  -6 -15   3   -0.58    0.42 
   6  15   3    0.69    0.59 
  -6 -15   3   -0.06    0.41 
   6 -15  -3    0.41    0.36 
  -6  15  -3    0.72    0.67 
  -6  15  -3    0.05    0.41 
  -6  15   3    0.38    0.59 
  -6 -15  -3   -0.32    0.62 
   6  15  -3   -0.04    0.68 
   6 -15   3    0.35    0.51 
  -6  15   3    1.58    0.73 
   6 -15   3    0.45    0.61 
  -6 -15   5    3.24    0.84 
   6  15   5    4.34    0.51 
   6  15   5    3.67    1.06 
   6 -15  -5    4.26    0.90 
  -6 -15   5    3.73    0.99 
  -6  15  -5    2.45    0.98 
  -6  15   5    4.86    0.68 
  -6  15   5    3.27    1.04 
   6 -15   5    5.04    0.99 
   6  15  -5    2.99    1.01 
  -6 -15  -5    4.63    0.98 
   6 -15   5    2.99    0.92 
   6  15   7    9.25    1.66 
  -6 -15   7   14.62    1.79 
   6 -15  -7    9.87    1.33 
  -6 -15   7    8.78    1.37 
  -6  15  -7    8.75    1.50 
  -6  15   7   11.71    1.09 
  -6 -15  -7   11.17    1.51 
   6 -15   7   10.67    1.56 
   6 -15   7   11.08    1.52 
   6  15  -7   11.02    1.65 
  -6  15   7    9.81    1.75 
  -6  15  -9    1.60    1.31 
  -6 -15   9    1.36    1.14 
  -6 -15   9    0.85    0.99 
   6  15   9    0.38    1.20 
   6 -15   9   -0.48    1.10 
   6  15  -9    0.14    1.12 
   6 -15   9    1.71    1.11 
  -6  15   9    0.25    1.35 
   6  16   0    7.84    0.97 
  -6  16   0    5.55    0.85 
   6 -16   0    5.72    0.64 
  -6 -16   0    7.51    0.71 
  -6 -16   0    7.34    0.51 
  -6 -16   0    7.21    0.88 
  -6  16   0    8.62    0.95 
  -6  16  -2    4.36    0.85 
   6 -16  -2    5.52    0.55 
  -6  16  -2    5.44    0.72 
  -6 -16   2    5.25    0.68 
  -6 -16   2    4.70    0.75 
  -6 -16   2    5.09    0.68 
   6  16   2    7.72    0.96 
  -6  16   2    5.28    0.75 
   6 -16   2    5.34    0.78 
   6 -16   2    5.08    0.84 
   6  16  -2    4.84    0.89 
  -6  16   2    5.49    0.93 
  -6 -16  -2    5.94    0.91 
  -6 -16   4   21.88    0.99 
  -6 -16   4   23.09    1.63 
   6  16   4   20.78    1.60 
  -6  16  -4   22.41    1.64 
   6 -16  -4   20.80    1.51 
   6 -16  -4   24.30    1.04 
  -6 -16   4   20.05    1.42 
   6 -16   4   19.18    1.46 
  -6 -16  -4   23.73    1.63 
   6 -16   4   20.83    0.89 
   6  16  -4   19.74    1.61 
   6 -16   4   23.33    1.62 
  -6  16   4   21.09    1.57 
  -6 -16   6    9.92    1.46 
  -6 -16   6    7.79    1.20 
   6  16   6   10.68    1.70 
   6 -16  -6   10.56    1.33 
  -6  16  -6    9.04    1.49 
  -6  16   6    8.58    0.91 
   6 -16   6    7.75    1.31 
  -6 -16  -6   10.97    1.39 
   6  16  -6    9.36    1.45 
   6 -16   6    9.18    1.31 
  -6  16   6    9.89    1.60 
  -6 -16   8    0.69    0.89 
   6  16   8   -0.11    1.08 
  -6  16  -8    1.73    1.20 
  -6 -16   8   -0.05    0.94 
   6 -16  -8   -0.14    0.81 
  -6  16   8   -0.12    1.23 
  -6 -16  -8   -0.16    0.91 
   6 -16   8    0.36    0.96 
   6 -16   8    0.26    1.05 
   6  16  -8    1.63    1.18 
   6 -17  -1   33.23    1.18 
  -6  17  -1   30.39    1.45 
  -6  17  -1   32.28    1.58 
  -6 -17   1   32.34    1.45 
  -6 -17   1   33.41    1.52 
  -6 -17   1   33.16    1.20 
   6  17   1   30.73    1.46 
  -6  17   1   31.23    1.64 
  -6 -17  -1   32.23    1.69 
   6 -17   1   32.32    1.39 
  -6 -17  -1   30.56    1.14 
  -6  17   1   30.44    1.38 
   6  17  -1   30.18    1.65 
   6 -17  -3    2.00    0.44 
   6  17   3    1.82    0.67 
  -6 -17   3    1.96    0.60 
  -6  17  -3    2.02    0.87 
  -6 -17   3    1.18    0.66 
  -6 -17   3    2.26    0.56 
   6  17  -3    2.45    0.93 
   6 -17   3    3.00    0.73 
  -6 -17  -3    1.87    0.81 
  -6  17   3    2.03    0.71 
   6 -17   3    1.98    0.76 
  -6  17   3    2.16    0.79 
  -6 -17   5   11.48    1.28 
  -6  17  -5    8.58    1.32 
   6 -17  -5   14.17    0.94 
   6 -17  -5    9.55    1.25 
   6  17   5   13.44    1.63 
  -6 -17   5   12.86    1.44 
   6 -17   5   12.90    1.42 
   6  17  -5   10.90    1.39 
  -6 -17  -5   10.80    1.35 
   6 -17   5   11.17    1.39 
  -6  17   5   14.00    1.59 
   6  17   7    0.58    1.05 
   6 -17  -7    1.04    0.87 
  -6  17  -7    1.43    1.16 
  -6 -17   7    0.50    0.91 
  -6 -17   7    1.06    0.86 
   6 -17   7    1.24    0.96 
  -6 -17  -7    0.06    0.86 
   6  17  -7   -0.97    0.96 
  -6  17   7    1.12    1.18 
   6 -17   7   -0.47    0.79 
  -6 -17   9    3.70    1.38 
  -6 -17   9    1.87    1.09 
   6  17   9    5.42    1.90 
  -6  17   9    5.62    1.92 
   6 -17   9    3.92    1.47 
   6 -17   9    3.66    1.39 
   6 -18   0   19.96    1.04 
  -6  18   0   17.67    1.29 
  -6 -18   0   18.39    1.34 
  -6 -18   0   17.91    1.04 
   6  18   0   18.20    1.34 
  -6  18   0   19.60    1.31 
  -6 -18   0   19.53    0.75 
   6  18   2    6.29    0.87 
  -6 -18   2    5.85    0.78 
  -6 -18   2    7.03    0.76 
  -6  18  -2    5.41    0.93 
  -6  18  -2    5.21    0.78 
  -6 -18   2    6.10    0.87 
   6 -18  -2    6.22    0.59 
  -6 -18  -2    5.75    0.98 
   6  18  -2    6.66    1.08 
   6 -18   2    7.02    0.96 
  -6 -18  -2    5.34    0.48 
   6 -18   2    5.67    0.78 
  -6  18   2    7.13    1.08 
  -6  18   2    6.84    0.89 
  -6 -18   4    8.76    0.76 
  -6  18  -4   10.49    1.32 
   6 -18  -4    8.35    0.74 
   6  18   4    7.61    1.13 
  -6 -18   4    6.84    0.97 
  -6 -18   4    6.20    1.06 
   6 -18  -4    8.14    1.13 
  -6 -18  -4    7.65    1.19 
  -6  18   4    8.22    1.18 
   6  18  -4    7.31    1.22 
   6 -18   4    6.02    1.04 
   6 -18   4    8.01    0.68 
   6 -18   4    7.44    1.04 
   6  18   6    3.19    1.12 
   6 -18  -6    3.35    0.99 
  -6 -18   6    2.46    0.96 
  -6  18  -6    4.57    1.32 
  -6 -18   6    3.12    1.03 
  -6 -18  -6    2.48    1.01 
   6  18  -6    3.38    1.18 
   6 -18   6    2.58    1.04 
  -6  18   6    2.52    1.17 
   6 -18   6    3.07    1.01 
  -6 -18   8    3.14    1.26 
  -6 -18   8    5.15    1.28 
   6  18   8    3.08    1.42 
  -6  18  -8    1.69    1.40 
   6 -18  -8    3.06    1.07 
   6 -18   8    2.28    1.27 
   6 -18   8    5.87    1.47 
   6  18  -8    3.63    1.35 
  -6  18   8    4.76    1.65 
  -6 -18  -8    4.40    1.29 
  -6 -19   1   20.99    1.33 
   6 -19  -1   21.34    1.03 
  -6 -19   1   22.28    1.01 
  -6  19  -1   21.73    1.48 
  -6 -19   1   23.32    1.30 
  -6  19  -1   19.89    1.36 
   6  19   1   20.82    1.33 
  -6  19   1   20.59    1.55 
  -6 -19  -1   22.35    1.00 
   6 -19   1   22.75    1.23 
  -6  19   1   21.24    1.27 
  -6 -19  -1   23.56    1.50 
   6  19  -1   21.98    1.54 
   6 -19  -3   22.14    1.56 
  -6 -19   3   22.43    1.56 
  -6 -19   3   19.61    1.27 
  -6 -19   3   17.23    1.17 
   6 -19  -3   20.15    0.93 
   6  19   3   21.16    1.51 
  -6  19  -3   20.43    1.62 
   6 -19   3   19.38    1.57 
   6 -19   3   21.60    1.11 
   6 -19   3   18.46    1.37 
  -6  19   3   20.79    1.45 
  -6 -19  -3   20.33    1.58 
   6  19  -3   19.73    1.67 
  -6  19  -5    0.68    0.95 
   6  19   5    0.11    0.81 
  -6 -19   5   -0.12    0.66 
  -6 -19   5    0.31    0.76 
   6 -19  -5    0.52    0.74 
   6 -19   5    0.73    0.85 
  -6  19   5    0.53    0.84 
  -6 -19  -5    0.19    0.85 
   6  19  -5   -0.37    0.91 
   6 -19   5   -0.78    0.63 
  -6  19  -7    2.53    1.32 
   6  19   7    2.18    1.26 
   6 -19  -7    1.26    0.95 
  -6 -19   7    2.30    1.08 
  -6 -19   7   -0.14    0.79 
   6  19  -7    2.47    1.18 
   6 -19   7    0.91    1.03 
  -6  19   7    2.47    1.30 
  -6 -19  -7    1.57    1.06 
   6 -19   7    0.55    0.95 
  -6 -20   0    5.69    0.71 
   6  20   0    4.61    0.98 
  -6 -20   0    6.54    0.97 
  -6 -20   0    4.95    0.49 
  -6  20   0    5.04    0.93 
  -6  20   0    4.90    0.92 
   6 -20   0    4.82    0.65 
   6  20   2   34.16    1.72 
   6 -20  -2   36.41    1.88 
  -6 -20   2   31.81    1.57 
  -6 -20   2   36.23    1.51 
   6 -20  -2   36.76    1.25 
  -6  20  -2   36.72    1.93 
  -6 -20   2   36.40    1.80 
  -6 -20  -2   37.44    1.18 
   6 -20   2   36.25    1.66 
  -6  20   2   35.10    1.66 
   6  20  -2   37.15    2.01 
   6 -20   2   38.61    1.94 
  -6 -20  -2   37.94    1.97 
   6 -20   2   38.83    1.61 
  -6 -20   4   12.18    1.25 
  -6  20  -4   11.23    1.41 
  -6 -20   4   12.33    0.92 
   6 -20  -4   10.96    1.33 
  -6 -20   4   12.25    1.39 
   6  20   4   12.46    1.56 
  -6 -20  -4   14.87    1.58 
   6  20  -4   13.50    1.59 
   6 -20   4   12.97    1.48 
   6 -20   4   13.65    0.86 
   6 -20   4   12.15    1.32 
  -6  20   4   14.53    1.44 
  -6  20  -6    3.55    1.30 
   6 -20  -6    4.01    1.05 
  -6 -20   6    3.80    1.03 
  -6 -20   6    5.37    1.21 
   6  20   6    4.54    1.30 
   6  20  -6    4.06    1.25 
  -6  20   6    4.74    1.34 
   6 -20   6    3.80    1.15 
   6 -20   6    4.50    1.19 
  -6 -20  -6    2.49    1.01 
  -6 -20   8    2.56    1.22 
   6 -20  -8    1.12    1.00 
   6  20   8   -1.03    1.05 
  -6  20  -8    0.37    1.32 
  -6 -20   8    0.30    0.91 
   6 -20   8    2.03    1.27 
   6  20  -8    1.03    1.21 
  -6  20   8    0.50    1.24 
  -6 -20  -8    1.11    1.14 
   6 -20   8   -0.32    1.01 
  -6 -21   1   46.04    1.91 
   6 -21  -1   46.60    1.55 
  -6 -21   1   49.63    1.58 
  -6  21  -1   46.40    2.16 
   6  21   1   47.86    2.00 
   6 -21  -1   44.58    2.10 
  -6 -21   1   49.69    2.05 
   6  21  -1   46.24    2.20 
  -6  21   1   47.18    1.92 
  -6 -21  -1   46.22    1.59 
   6 -21   1   47.35    1.96 
  -6 -21  -1   49.30    2.22 
   6 -21   1   46.79    1.79 
   6 -21   1   46.90    2.06 
   6  21   3    4.31    0.92 
  -6 -21   3    2.98    0.67 
  -6 -21   3    4.34    0.92 
  -6  21  -3    3.43    1.02 
   6 -21  -3    3.77    0.53 
   6 -21  -3    4.16    0.96 
  -6 -21   3    2.33    0.70 
   6 -21   3    3.77    0.84 
  -6 -21  -3    2.93    0.92 
   6 -21   3    3.76    0.67 
  -6  21   3    4.95    0.93 
   6 -21   3    5.77    1.07 
   6  21  -3    3.93    1.14 
  -6 -21   5    2.98    0.98 
   6 -21  -5    3.14    0.99 
   6  21   5    3.04    1.04 
  -6  21  -5    4.65    1.24 
  -6 -21   5    2.88    0.86 
  -6 -21  -5    4.58    1.13 
  -6  21   5    4.93    1.17 
   6  21  -5    3.34    1.19 
   6 -21   5    5.14    1.07 
   6 -21   5    2.98    1.06 
  -6  21  -7    2.30    1.29 
   6  21   7    4.02    1.44 
   6 -21  -7    2.54    1.05 
  -6 -21   7    5.03    1.28 
  -6 -21   7    2.58    1.00 
   6 -21   7    1.65    1.11 
  -6  21   7    2.06    1.33 
   6  21  -7    1.86    1.21 
  -6 -21  -7    2.51    1.18 
   6 -21   7    3.52    1.30 
  -6 -22   0   40.02    1.19 
   6 -22   0   37.19    1.89 
  -6  22   0   38.52    1.95 
  -6 -22   0   37.08    1.60 
  -6 -22   0   39.93    1.98 
   6 -22   0   36.04    1.49 
   6  22   0   37.40    1.97 
  -6 -22   2   13.12    1.00 
  -6 -22   2   13.10    1.31 
   6 -22  -2   13.83    1.40 
   6  22   2   13.81    1.30 
  -6 -22   2   12.69    1.17 
  -6  22  -2   15.43    1.61 
   6 -22  -2   14.67    0.87 
  -6 -22  -2   15.13    0.80 
   6 -22   2   12.54    1.14 
   6 -22   2   14.97    1.43 
   6 -22   2   14.31    1.17 
  -6  22   2   14.98    1.28 
   6  22  -2   15.37    1.65 
  -6 -22  -2   12.84    1.40 
  -6 -22   4    7.71    1.08 
  -6 -22   4    8.24    1.21 
  -6  22  -4    8.13    1.33 
   6  22   4    8.31    1.31 
  -6 -22   4    8.82    1.31 
   6 -22  -4    7.18    1.20 
   6  22  -4    8.58    1.42 
  -6 -22  -4    7.97    1.28 
  -6  22   4    9.76    1.39 
   6 -22   4    8.16    1.26 
   6 -22   4    9.05    1.20 
  -6 -22   6    1.76    0.84 
  -6  22  -6    1.94    1.19 
   6 -22  -6    4.13    1.08 
   6  22   6    2.82    1.19 
  -6 -22   6    3.28    1.16 
   6  22  -6    4.56    1.36 
   6 -22   6    4.23    1.20 
  -6 -22  -6    2.90    1.08 
  -6  22   6    4.93    1.38 
   6 -22   6    3.16    1.10 
  -6 -22   8    1.11    1.12 
  -6  22  -8    0.00    1.38 
  -6 -22   8    2.66    1.10 
   6  22   8   -0.67    1.03 
   6 -22  -8    0.09    0.94 
   6  22  -8    0.48    1.23 
  -6  22   8    0.58    1.36 
   6 -22   8    0.26    1.13 
  -6 -22  -8   -0.26    1.10 
   6 -22   8    0.00    1.01 
  -6 -23   1    0.08    0.62 
  -6 -23   1   -0.03    0.48 
  -6  23  -1   -0.29    0.75 
   6 -23  -1    0.51    0.67 
   6  23   1    0.59    0.63 
   6 -23  -1   -0.83    0.39 
  -6 -23   1    0.14    0.37 
  -6 -23  -1    0.81    0.76 
   6 -23   1   -0.78    0.59 
  -6  23   1    0.00    0.66 
   6  23  -1   -0.90    0.70 
  -6 -23  -1    0.13    0.39 
   6 -23   1    0.59    0.50 
   6 -23   1    0.73    0.73 
  -6  23  -3    1.88    1.09 
   6 -23  -3    3.14    0.95 
  -6 -23   3    2.15    0.69 
  -6 -23   3    1.28    0.77 
   6  23   3    2.43    0.87 
  -6 -23   3    2.09    0.66 
   6  23  -3    1.82    1.01 
   6 -23   3    2.12    0.72 
   6 -23   3    2.14    0.89 
  -6  23   3    2.02    0.81 
   6 -23   3    3.06    0.68 
  -6 -23  -3    2.02    0.95 
  -6 -23   5    0.44    0.73 
   6 -23  -5   -0.12    0.84 
  -6  23  -5    2.41    1.16 
  -6 -23   5    2.32    0.98 
   6  23   5    2.80    1.02 
   6 -23   5    1.37    0.84 
  -6  23   5    1.38    1.00 
   6 -23   5    2.09    0.97 
   6  23  -5    1.39    1.11 
  -6 -23  -5    0.31    0.93 
   6  23   7    2.45    1.27 
  -6 -23   7    2.23    1.13 
   6 -23  -7    0.24    0.91 
  -6  23  -7    2.63    1.37 
  -6 -23   7    0.53    0.88 
   6  23  -7    1.31    1.37 
   6 -23   7    3.13    1.26 
  -6 -23  -7    0.50    1.14 
   6 -23   7    1.10    1.12 
  -6  23   7    4.50    1.59 
   6  24   0    3.44    0.99 
   6 -24   0    0.93    0.51 
   6 -24   0    1.88    0.78 
  -6 -24   0    1.64    0.58 
   6 -24   0   -0.67    0.62 
  -6 -24   0    1.36    0.82 
  -6  24   0    2.52    0.90 
  -6  24  -2    9.69    1.45 
   6  24   2    7.91    1.14 
  -6 -24   2    6.55    0.96 
   6 -24  -2    8.23    1.20 
  -6 -24   2    8.09    1.09 
  -6 -24   2    8.25    0.86 
   6  24  -2    5.50    1.27 
  -6  24   2    7.71    1.10 
  -6 -24  -2    6.56    1.17 
  -6 -24  -2    7.35    0.69 
   6 -24   2    7.39    0.97 
   6 -24   2    7.11    1.12 
   6 -24   2    8.43    1.02 
   6  24   4    3.20    1.14 
  -6  24  -4    4.94    1.32 
   6 -24  -4    2.15    0.92 
  -6 -24   4    2.93    0.96 
  -6 -24   4    3.71    0.82 
   6 -24   4    2.53    0.98 
  -6  24   4    2.88    1.00 
  -6 -24  -4    3.19    1.07 
   6 -24   4    3.64    0.91 
   6  24  -4    3.82    1.18 
   6  24   6    7.50    1.65 
   6 -24  -6    6.44    1.28 
  -6 -24   6    4.66    1.23 
  -6  24  -6    4.35    1.56 
  -6 -24   6    3.66    1.01 
   6 -24   6    3.93    1.24 
   6 -24   6    5.24    1.26 
  -6 -24  -6    3.09    1.18 
   6  24  -6    3.93    1.36 
  -6  24   6    4.39    1.42 
   6 -25  -1   31.76    1.91 
   6 -25  -1   34.51    1.34 
  -6 -25   1   34.51    1.77 
  -6 -25   1   35.02    1.92 
  -6 -25   1   32.68    1.33 
   6  25   1   34.71    1.88 
  -6  25  -1   35.12    2.10 
  -6 -25  -1   35.30    1.48 
  -6 -25  -1   34.06    2.01 
   6  25  -1   35.15    2.13 
   6 -25   1   38.16    2.02 
  -6  25   1   35.05    1.86 
   6 -25   1   37.24    1.64 
   6 -25   1   35.88    1.88 
  -6 -25   3    0.15    0.53 
  -6  25  -3    0.36    0.97 
   6  25   3    1.28    0.79 
  -6 -25   3    0.74    0.64 
  -6 -25   3    0.10    0.69 
   6 -25  -3    1.03    0.84 
   6 -25   3    1.90    0.62 
   6  25  -3    2.37    1.10 
  -6  25   3    1.88    0.89 
  -6 -25  -3   -0.46    0.79 
   6 -25   3    0.57    0.62 
   6 -25   3    0.24    0.80 
  -6 -25   5    7.47    1.16 
   6  25   5    6.51    1.33 
   6 -25  -5    7.57    1.35 
  -6  25  -5    9.89    1.69 
  -6 -25   5    8.13    1.42 
  -6  25   5    6.37    1.42 
   6 -25   5    6.82    1.27 
  -6 -25  -5    6.83    1.36 
   6  25  -5    8.26    1.65 
   6 -25   5    7.79    1.42 
  -6 -25   7    1.07    0.87 
   6 -25  -7    3.00    1.12 
  -6  25  -7    1.45    1.45 
   6  25   7    2.49    1.39 
  -6 -25   7    2.07    1.21 
   6 -25   7    0.72    1.15 
   6 -25   7    1.22    1.02 
   6  25  -7    0.85    1.34 
  -6  25   7    2.41    1.46 
  -6 -25  -7    0.26    1.15 
  -6 -26   0   31.64    1.59 
  -6  26   0   32.18    2.00 
   6 -26   0   30.60    1.40 
  -6 -26   0   29.99    1.96 
   6 -26   0   30.35    1.86 
   6 -26   0   32.97    1.93 
   6  26   0   29.49    1.97 
  -6 -26   2   12.04    1.01 
  -6 -26   2   12.26    1.25 
   6  26   2   11.98    1.40 
   6 -26  -2   12.24    1.46 
  -6 -26   2   10.39    1.23 
  -6  26  -2   11.12    1.63 
   6 -26   2   10.73    1.34 
   6  26  -2   11.70    1.61 
  -6 -26  -2   12.64    1.48 
  -6  26   2   14.70    1.39 
   6 -26   2   11.69    1.18 
   6 -26   2   14.86    1.35 
   6  26   4    0.09    0.80 
   6 -26  -4   -0.58    0.78 
  -6  26  -4   -0.72    1.06 
  -6 -26   4    0.91    0.64 
  -6 -26   4    0.04    0.73 
  -6 -26  -4    0.27    0.92 
   6 -26   4    0.29    0.83 
  -6  26   4    0.82    0.87 
   6  26  -4    0.95    1.13 
   6 -26   4   -0.58    0.62 
  -6  26  -6    1.25    1.42 
  -6 -26   6    0.32    0.76 
  -6 -26   6    2.83    1.14 
   6 -26  -6    0.16    0.99 
   6  26   6    1.06    1.06 
   6 -26   6    1.02    1.24 
  -6 -26  -6   -0.53    1.07 
  -6  26   6    2.68    1.34 
   6  26  -6    0.43    1.29 
   6 -26   6    0.56    0.90 
  -6 -27   1   18.37    1.40 
   6  27   1   16.05    1.54 
   6 -27  -1   17.71    1.59 
  -6  27  -1   16.68    1.79 
  -6 -27   1   17.30    0.98 
  -6 -27   1   18.38    1.59 
  -6  27   1   16.14    1.51 
  -6 -27  -1   17.37    1.65 
  -6 -27  -1   16.78    1.14 
   6  27  -1   16.97    1.83 
   6 -27   1   15.59    1.21 
   6 -27   1   16.02    1.49 
   6 -27   1   14.72    1.52 
   6  27   3    9.53    1.44 
  -6 -27   3    6.45    0.97 
  -6  27  -3    6.33    1.46 
  -6 -27   3    7.40    0.95 
  -6 -27   3    6.61    1.16 
   6 -27  -3    7.75    1.35 
   6 -27   3    6.27    1.22 
  -6 -27  -3    7.61    1.39 
   6 -27   3    8.25    1.00 
  -6  27   3    7.48    1.31 
   6 -27   3    5.59    0.99 
   6  27  -3    5.32    1.38 
  -6  27  -5    0.66    1.28 
   6  27   5    1.34    1.01 
   6 -27  -5    1.88    0.99 
  -6 -27   5    1.73    0.98 
  -6 -27   5    2.19    0.83 
   6 -27   5    2.37    1.15 
   6 -27   5    2.02    0.90 
  -6  27   5    0.11    1.06 
  -6 -27  -5    1.08    1.05 
   6  27  -5    1.98    1.30 
  -6 -27   7    0.71    1.09 
   6 -27  -7    1.43    1.05 
   6  27   7    1.87    1.36 
  -6 -27   7    2.66    1.03 
  -6  27  -7    1.57    1.56 
  -6 -27  -7    0.06    1.08 
   6  27  -7    4.06    1.61 
   6 -27   7    1.80    1.20 
   6 -27   7    3.08    1.33 
  -6  27   7    2.33    1.55 
   6 -28   0   16.68    1.53 
   6  28   0   12.85    1.56 
   6 -28   0   13.67    1.11 
   6 -28   0   11.67    1.35 
  -6  28   0   16.19    1.77 
  -6 -28   0   15.18    1.61 
  -6 -28   0   12.45    1.18 
  -6  28  -2    5.75    1.44 
  -6 -28   2    8.86    0.92 
  -6 -28   2    7.63    1.13 
   6 -28  -2    7.32    1.31 
   6  28   2    9.87    1.46 
  -6 -28   2    6.38    1.06 
   6 -28   2    9.13    1.14 
  -6  28   2    7.80    1.21 
   6  28  -2    9.29    1.65 
   6 -28   2    7.84    1.28 
  -6 -28  -2    7.28    1.35 
   6 -28   2    8.48    1.07 
   6  28   4    1.30    0.93 
  -6  28  -4    2.60    1.33 
  -6 -28   4    1.69    0.72 
  -6 -28   4    0.58    0.82 
   6 -28  -4    2.47    1.04 
   6 -28   4    2.18    0.90 
  -6 -28  -4    3.52    1.15 
   6 -28   4    1.95    1.03 
  -6  28   4    1.36    1.04 
   6  28  -4    1.32    1.25 
   6  28   6    7.52    1.66 
  -6 -28   6    6.36    1.43 
  -6 -28   6    7.45    1.30 
  -6  28  -6    6.63    1.77 
   6 -28  -6    9.25    1.52 
   6  28  -6    4.99    1.57 
  -6 -28  -6    5.07    1.35 
  -6  28   6    7.67    1.79 
   6 -28   6    6.91    1.40 
   6 -28   6    7.29    1.65 
  -6  29  -1    5.22    1.33 
   6  29   1    5.64    1.10 
   6 -29  -1    6.14    1.07 
  -6 -29   1    5.88    1.16 
   6 -29  -1    6.14    1.21 
  -6 -29   1    5.00    0.92 
  -6  29   1    5.34    1.14 
  -6 -29  -1    6.92    0.86 
  -6 -29  -1    5.64    1.23 
   6 -29   1    5.70    1.13 
   6  29  -1    6.08    1.46 
   6 -29   1    7.54    1.18 
   6 -29   1    6.22    0.88 
  -6 -29   3   12.14    1.17 
  -6 -29   3   10.13    1.38 
   6  29   3   13.52    1.76 
  -6  29  -3    9.22    1.66 
  -6 -29   3   10.00    1.21 
   6 -29  -3   12.37    1.58 
   6 -29   3    9.56    1.42 
   6 -29   3   10.94    1.31 
  -6 -29  -3    9.69    1.54 
  -6  29   3   12.02    1.60 
   6 -29   3   10.51    1.15 
   6  29  -3    9.64    1.62 
  -6 -29   5    2.67    1.22 
  -6  29  -5    2.87    1.50 
  -6 -29   5    4.17    1.00 
   6 -29  -5    4.10    1.23 
   6  29   5    3.01    1.22 
  -6 -29  -5    3.06    1.21 
  -6  29   5    3.20    1.41 
   6 -29   5    3.70    1.30 
   6  29  -5    3.30    1.43 
   6 -29   5    3.89    1.12 
   6 -30   0   12.05    1.39 
  -6 -30   0   11.77    1.18 
  -6 -30   0   13.78    1.61 
   6  30   0   12.75    1.73 
  -6  30   0   13.76    1.76 
   6 -30   0   15.33    1.59 
  -6 -30   2    6.18    1.10 
   6 -30  -2    4.33    1.16 
  -6  30  -2    4.49    1.38 
   6 -30  -2    5.18    1.03 
  -6 -30   2    6.00    1.08 
   6  30   2    7.56    1.30 
   6 -30   2    4.27    1.18 
  -6 -30  -2    4.92    1.25 
   6 -30   2    4.88    0.90 
   6 -30   2    5.93    1.04 
   6  30  -2    4.82    1.34 
  -6  30   2    6.20    1.28 
   6 -30  -4    5.73    1.35 
  -6 -30   4    6.42    1.02 
  -6 -30   4    4.34    1.08 
  -6  30  -4    4.58    1.54 
   6  30   4    4.72    1.28 
   6 -30   4    5.15    1.29 
   6 -30   4    6.60    1.19 
  -6 -30  -4    5.72    1.33 
  -6  30   4    7.39    1.48 
   6  30  -4    4.12    1.50 
  -6  30  -6    7.85    1.96 
  -6 -30   6    6.62    1.58 
  -6 -30   6    7.59    1.33 
   6 -30  -6    5.40    1.43 
   6  30   6    4.85    1.56 
  -6  30   6    5.57    1.68 
   6 -30   6    7.93    1.56 
  -6 -30  -6    5.27    1.47 
   6 -30   6    7.31    1.73 
   6  30  -6    5.41    1.78 
  -6 -31   1    7.53    1.10 
   6 -31  -1    7.14    1.26 
   6 -31  -1    7.39    1.20 
   6  31   1    6.85    1.28 
  -6  31  -1    8.76    1.59 
  -6 -31   1    7.70    1.34 
  -6 -31  -1    8.03    1.40 
   6  31  -1    6.37    1.45 
   6 -31   1    7.44    1.24 
  -6  31   1    7.51    1.33 
   6 -31   1    7.09    1.27 
   6 -31  -3    5.49    1.27 
  -6 -31   3    5.37    1.10 
  -6 -31   3    5.67    0.89 
  -6  31  -3    7.16    1.71 
  -6 -31   3    4.48    1.11 
   6  31   3    4.21    1.23 
  -6 -31  -3    3.24    1.26 
  -6  31   3    4.34    1.35 
   6  31  -3    4.62    1.50 
   6 -31   3    6.69    1.35 
   6 -31   3    8.44    1.56 
   6 -31   3    6.08    1.10 
   6  31   5   10.56    1.83 
   6 -31  -5   10.79    1.72 
  -6 -31   5    8.68    1.28 
  -6  31  -5   10.31    1.99 
  -6 -31   5    8.41    1.58 
   6 -31   5    9.87    1.85 
   6 -31   5    7.15    1.32 
   6  31  -5    8.01    1.84 
  -6  31   5   10.83    2.01 
  -6 -31  -5    8.84    1.67 
  -6 -32   0   12.09    1.27 
  -6 -32   0   13.53    1.66 
   6 -32   0   12.86    1.58 
  -6  32   0   13.66    1.83 
   6  32   0   12.27    1.82 
   6 -32   0    7.92    1.27 
  -6 -32   2   -0.89    0.75 
   6 -32  -2    1.14    0.97 
  -6 -32   2   -0.95    0.61 
  -6  32  -2    0.74    1.16 
   6  32   2   -0.18    0.88 
   6 -32  -2   -0.85    0.67 
   6 -32   2   -0.21    0.85 
  -6  32   2   -1.65    0.86 
  -6 -32  -2    0.32    0.97 
   6 -32   2    0.97    0.81 
   6 -32   2   -0.49    0.58 
   6  32  -2   -0.69    1.00 
   6  32   4   -1.19    0.81 
   6 -32  -4   -0.38    0.96 
  -6 -32   4    1.45    0.95 
  -6  32  -4    1.92    1.46 
  -6 -32   4    1.20    0.69 
  -6  32   4   -0.72    1.02 
   6  32  -4    0.14    1.28 
   6 -32   4   -1.41    0.87 
   6 -32   4   -0.49    0.68 
  -6 -32  -4    1.13    1.10 
   6  33   1    5.14    1.29 
  -6 -33   1    4.24    0.99 
  -6  33  -1    5.34    1.51 
   6 -33  -1    3.50    1.02 
  -6 -33   1    5.31    1.26 
   6 -33  -1    4.24    1.22 
  -6 -33  -1    2.68    1.14 
  -6  33   1    5.05    1.36 
   6  33  -1    5.79    1.46 
   6 -33   1    2.68    1.03 
   6 -33   1    4.92    1.14 
   6 -33  -3    6.90    1.44 
  -6  33  -3    5.43    1.70 
  -6 -33   3    5.87    1.19 
   6  33   3    6.92    1.46 
   6 -33   3    6.75    1.13 
  -6 -33  -3    6.91    1.48 
   6  33  -3    5.04    1.59 
  -6  33   3    7.55    1.58 
   6 -33   3    3.71    1.23 
  -6 -33   5   -0.13    0.97 
   6 -33  -5    1.64    1.17 
   6  33   5   -0.90    1.07 
  -6 -33   5    2.05    0.86 
  -6  33  -5   -1.58    1.47 
   6 -33   5    1.15    0.90 
   6 -33   5    1.26    1.13 
   6  33  -5   -0.73    1.43 
  -6  33   5    1.44    1.33 
  -6 -33  -5    1.74    1.23 
  -6  34   0    1.20    1.22 
   6 -34   0    0.50    0.84 
   6 -34   0    1.91    1.00 
   6  34   0    1.45    1.16 
  -6 -34   0    1.80    1.14 
  -6 -34   0   -0.11    0.58 
  -6 -34   2    5.01    1.09 
  -6 -34   2    6.45    1.25 
   6 -34  -2    2.72    1.00 
  -6  34  -2    4.09    1.59 
   6  34   2    6.82    1.52 
   6 -34  -2    5.30    1.34 
  -6 -34  -2    5.85    1.49 
   6 -34   2    5.16    1.13 
  -6  34   2    3.44    1.33 
   6 -34   2    4.52    1.20 
   6  34  -2    5.79    1.59 
   6 -34  -4    6.61    1.49 
   6  34   4    5.60    1.57 
  -6  34  -4    5.28    1.83 
  -6 -34   4    5.37    1.34 
  -6 -34  -4    5.51    1.48 
   6  34  -4    3.59    1.64 
   6 -34   4    5.28    1.12 
  -6  34   4    8.66    1.90 
   6 -34   4    3.47    1.34 
   6  35   1    2.12    1.17 
  -6 -35   1    1.93    0.81 
  -6  35  -1    1.68    1.41 
   6 -35  -1    2.10    0.98 
  -6 -35   1    3.09    1.16 
   6 -35  -1    3.42    1.21 
   6 -35   1    2.74    1.01 
   6  35  -1    2.16    1.38 
   6 -35   1    1.78    0.99 
  -6  35   1    2.82    1.32 
  -6 -35  -1    2.57    1.22 
  -6 -35   3   -0.94    0.70 
   6 -35  -3    2.34    1.14 
  -6  35  -3    0.96    1.51 
   6  35   3   -0.53    0.91 
   6  35  -3   -0.20    1.33 
  -6  35   3    0.73    1.26 
  -6 -35  -3   -0.38    1.02 
   6 -35   3   -0.10    0.91 
   6 -36   0   19.56    2.06 
  -6  36   0   16.81    2.10 
   6 -36   0   16.63    1.75 
  -6 -36   0   15.91    1.96 
   6  36   0   16.80    2.14 
  -6  36  -2   -1.45    1.38 
   6  36   2    0.48    1.05 
   6 -36  -2    0.59    1.07 
  -6 -36   2   -0.08    0.76 
  -6 -36   2   -0.37    0.86 
   6 -36   2   -0.21    0.86 
   6  36  -2   -0.97    1.26 
  -6  36   2   -1.03    1.10 
   6 -36   2    0.03    0.81 
  -6 -36  -2    0.97    1.23 
   6 -36  -4    1.74    1.22 
  -6 -36   4   -0.09    0.93 
   6  36   4    1.40    1.31 
  -6  36  -4    1.23    1.76 
  -6  36   4    1.41    1.34 
   6  36  -4    0.97    1.58 
   6 -36   4   -0.87    0.94 
  -6 -36  -4    2.82    1.37 
   6  37   1   -0.81    0.97 
  -6  37  -1   -0.92    1.30 
   6 -37  -1   -0.38    0.98 
   6 -37  -1   -1.95    0.72 
  -6 -37   1   -0.07    0.68 
  -6 -37   1   -0.73    0.95 
  -6 -37  -1    1.66    1.25 
   6 -37   1   -0.60    0.80 
   6  37  -1   -0.82    1.12 
   6 -37   1    0.08    0.92 
  -6  37   1    0.04    1.15 
  -6  37  -3    1.57    1.71 
   6  37   3   -0.10    1.12 
  -6 -37   3    1.56    0.97 
   6 -37  -3    2.84    1.27 
   6  37  -3    2.06    1.66 
  -6  37   3    1.33    1.37 
  -6 -37  -3    1.87    1.30 
   6 -37   3    1.30    1.08 
   6 -38   0    1.80    1.12 
   6  38   0    0.46    1.18 
  -6  38   0    0.12    1.31 
  -6 -38   0    1.05    1.24 
   6 -38   0   -1.07    0.78 
   6 -38  -2    1.71    1.21 
  -6 -38   2    0.71    0.78 
  -6  38  -2   -0.65    1.50 
  -6 -38   2    1.68    1.04 
   6  38   2    0.68    1.22 
  -6 -38  -2    2.68    1.36 
   6  38  -2   -0.77    1.44 
   6 -38   2    2.32    1.39 
  -6  38   2   -1.55    1.12 
   6 -38   2    0.35    0.99 
   6  39   1    4.92    1.54 
   6 -39  -1    5.67    1.42 
  -6  39  -1    3.47    1.72 
  -6 -39   1    3.26    1.24 
   6  39  -1    4.12    1.60 
   6 -39   1    4.92    1.34 
  -6  39   1    3.11    1.52 
   6 -39   1    2.75    1.12 
  -6 -39  -1    4.99    1.51 
   7   0   0   -0.40    0.32 
  -7   0   0    0.82    0.36 
  -7   0   0   -0.57    0.43 
   7   0   2    1.67    0.45 
   7   0   2    0.49    0.50 
   7   0  -2    0.25    0.48 
  -7   0  -2   -0.42    0.42 
  -7   0   2   -0.20    0.38 
  -7   0   2   -0.19    0.42 
  -7   0   2    0.45    0.40 
  -7   0   4    0.07    0.48 
   7   0  -4   -0.62    0.61 
   7   0   4    0.04    0.65 
   7   0   4    0.57    0.42 
   7   0   4    0.56    0.48 
  -7   0  -4   -0.20    0.43 
  -7   0   4    0.49    0.50 
  -7   0   4    0.24    0.34 
   7   0   6   -0.03    0.60 
  -7   0   6   -0.59    0.53 
  -7   0  -6   -0.11    0.45 
   7   0  -6    0.49    0.48 
  -7   0  -6   -0.23    0.81 
  -7   0   6    0.89    0.67 
   7   0   6   -0.12    0.48 
   7   0  -6    0.51    0.88 
   7   0   8    0.93    0.88 
   7   0   8   -0.30    0.69 
  -7   0  -8   -0.63    0.99 
  -7   0   8   -0.84    0.72 
  -7   0   8   -0.63    0.65 
   7   0  -8    0.81    0.95 
  -7  -1   1   25.44    0.92 
  -7   1  -1   26.50    1.09 
   7   1   1   24.03    0.94 
  -7  -1   1   25.72    1.06 
   7   1   1   24.61    0.90 
  -7  -1   1   25.09    1.03 
   7  -1   1   23.39    0.92 
   7   1  -1   24.29    0.80 
  -7   1   1   24.30    1.01 
  -7  -1  -1   26.68    1.06 
  -7   1   1   26.13    1.07 
  -7   1   1   24.72    0.91 
   7  -1   1   25.65    0.96 
   7   1   3  149.93    3.67 
  -7  -1   3  151.37    3.79 
   7   1   3  150.35    3.45 
   7   1   3  148.42    3.93 
  -7   1  -3  150.38    3.54 
  -7  -1   3  147.99    3.69 
  -7  -1   3  150.76    3.54 
  -7   1   3  151.84    3.61 
   7  -1   3  151.46    3.73 
   7  -1   3  148.90    3.92 
  -7  -1  -3  150.98    3.60 
   7  -1   3  151.60    3.55 
  -7   1   3  154.08    3.68 
  -7   1   3  150.08    3.76 
   7   1  -3  149.06    3.81 
   7   1   5    9.91    1.33
[truncated: 941,766 more chars]
