# Supplementary material for: Synthesis, Characterization and DFT Study of a New Family of High-Energy Compounds Based on s-Triazine, Carborane and Tetrazoles
Source: Molecules. 2022 Nov 2;27(21):7484. doi: 10.3390/molecules27217484 (PMC9656522; doi:10.3390/molecules27217484)
Supplement: Supplementary file 1 [file molecules-27-07484-s001.zip › Compound_20.cif]

 
data_aa_sq 
  
_audit_creation_method            'SHELXL-2014/7' 
_shelx_SHELXL_version_number      '2014/7' 
_chemical_name_systematic         ? 
_chemical_name_common             ? 
_chemical_melting_point           ? 
_chemical_formula_moiety          
 'C19 H24 B10 N10 O, C H2 Cl2' 
_chemical_formula_sum 
 'C20 H26 B10 Cl2 N10 O' 
_chemical_formula_weight          601.51 
  
loop_ 
 _atom_type_symbol 
 _atom_type_description 
 _atom_type_scat_dispersion_real 
 _atom_type_scat_dispersion_imag 
 _atom_type_scat_source 
 'C'  'C'   0.0033   0.0016 
 'International Tables Vol C Tables 4.2.6.8 and 6.1.1.4' 
 'H'  'H'   0.0000   0.0000 
 'International Tables Vol C Tables 4.2.6.8 and 6.1.1.4' 
 'B'  'B'   0.0013   0.0007 
 'International Tables Vol C Tables 4.2.6.8 and 6.1.1.4' 
 'N'  'N'   0.0061   0.0033 
 'International Tables Vol C Tables 4.2.6.8 and 6.1.1.4' 
 'Cl'  'Cl'   0.1484   0.1585 
 'International Tables Vol C Tables 4.2.6.8 and 6.1.1.4' 
 'O'  'O'   0.0106   0.0060 
 'International Tables Vol C Tables 4.2.6.8 and 6.1.1.4' 
  
_space_group_crystal_system       triclinic 
_space_group_IT_number            2 
_space_group_name_H-M_alt         'P -1' 
_space_group_name_Hall            '-P 1' 
  
_shelx_space_group_comment 
; 
The symmetry employed for this shelxl refinement is uniquely defined 
by the following loop, which should always be used as a source of 
symmetry information in preference to the above space-group names. 
They are only intended as comments. 
; 
  
loop_ 
 _space_group_symop_operation_xyz 
 'x, y, z' 
 '-x, -y, -z' 
  
_cell_length_a                    14.089(2) 
_cell_length_b                    15.442(3) 
_cell_length_c                    16.375(3) 
_cell_angle_alpha                 109.645(4) 
_cell_angle_beta                  95.426(4) 
_cell_angle_gamma                 116.641(4) 
_cell_volume                      2868.8(9) 
_cell_formula_units_Z             4 
_cell_measurement_temperature     120(2) 
_cell_measurement_reflns_used     1434 
_cell_measurement_theta_min       2.47 
_cell_measurement_theta_max       19.62 
  
_exptl_crystal_description        plate 
_exptl_crystal_colour             colourless 
_exptl_crystal_density_meas       ? 
_exptl_crystal_density_method     ? 
_exptl_crystal_density_diffrn     1.393 
_exptl_crystal_F_000              1232 
_exptl_transmission_factor_min    ? 
_exptl_transmission_factor_max    ? 
_exptl_crystal_size_max           0.350 
_exptl_crystal_size_mid           0.250 
_exptl_crystal_size_min           0.050 
_exptl_absorpt_coefficient_mu     0.264 
_shelx_estimated_absorpt_T_min    0.913 
_shelx_estimated_absorpt_T_max    0.987 
_exptl_absorpt_correction_type    multi-scan 
_exptl_absorpt_correction_T_min   0.847
_exptl_absorpt_correction_T_max   0.987  
_exptl_absorpt_process_details    SADABS 
_exptl_absorpt_special_details    ? 
_diffrn_ambient_temperature       120(2) 
_diffrn_radiation_wavelength      0.71073 
_diffrn_radiation_type            MoK\a 
_diffrn_source                    ? 
_diffrn_measurement_device_type   'Bruker APEX-II CCD' 
_diffrn_measurement_method        '\f and \w scans' 
_diffrn_detector_area_resol_mean  ? 
_diffrn_reflns_number             28302 
_diffrn_reflns_av_unetI/netI      0.1669 
_diffrn_reflns_av_R_equivalents   0.1204 
_diffrn_reflns_limit_h_min        -17 
_diffrn_reflns_limit_h_max        17 
_diffrn_reflns_limit_k_min        -19 
_diffrn_reflns_limit_k_max        19 
_diffrn_reflns_limit_l_min        -20 
_diffrn_reflns_limit_l_max        20 
_diffrn_reflns_theta_min          2.270 
_diffrn_reflns_theta_max          25.999 
_diffrn_reflns_theta_full         25.242 
_diffrn_measured_fraction_theta_max   0.999 
_diffrn_measured_fraction_theta_full  0.999 
_diffrn_reflns_Laue_measured_fraction_max    0.999 
_diffrn_reflns_Laue_measured_fraction_full   0.999 
_diffrn_reflns_point_group_measured_fraction_max   0.999 
_diffrn_reflns_point_group_measured_fraction_full  0.999 
_reflns_number_total              11263 
_reflns_number_gt                 5302 
_reflns_threshold_expression      'I > 2\s(I)' 
_reflns_Friedel_coverage          0.000 
_reflns_Friedel_fraction_max      . 
_reflns_Friedel_fraction_full     . 
  
_reflns_special_details 
; 
 Reflections were merged by SHELXL according to the crystal 
 class for the calculation of statistics and refinement. 
  
 Structure factors included contributions from the .fab file. 
  
 _reflns_Friedel_fraction is defined as the number of unique 
 Friedel pairs measured divided by the number that would be 
 possible theoretically, ignoring centric projections and 
 systematic absences. 
; 
  
_computing_data_collection        'Bruker APEX2' 
_computing_cell_refinement        'Bruker SAINT' 
_computing_data_reduction         'Bruker SAINT' 
_computing_structure_solution     'SHELXS-97 (Sheldrick 2008)' 
_computing_structure_refinement 'SHELXL-2014/7 (Sheldrick, 2014)' 
_computing_molecular_graphics     'Bruker SHELXTL' 
_computing_publication_material   'Bruker SHELXTL' 
_refine_special_details           
;
The structure contains 4 solvent dichloromethane molecules per
unit cell. These solvent molecules cannot be reasonably localized and 
refined therefore they were eliminated from the refinement using 
"SQUEEZE" option in PLATON (Spek, 2015).
;
 
_refine_ls_structure_factor_coef  Fsqd 
_refine_ls_matrix_type            full 
_refine_ls_weighting_scheme       calc 
_refine_ls_weighting_details 
'w=1/[\s^2^(Fo^2^)+(0.0752P)^2^] where P=(Fo^2^+2Fc^2^)/3' 
_atom_sites_solution_primary      direct 
_atom_sites_solution_secondary    ? 
_atom_sites_solution_hydrogens    mixed 
_refine_ls_hydrogen_treatment     constr 
_refine_ls_extinction_method      none 
_refine_ls_extinction_coef        . 
_refine_ls_number_reflns          11263 
_refine_ls_number_parameters      721 
_refine_ls_number_restraints      0 
_refine_ls_R_factor_all           0.1660 
_refine_ls_R_factor_gt            0.0720 
_refine_ls_wR_factor_ref          0.2002 
_refine_ls_wR_factor_gt           0.1539 
_refine_ls_goodness_of_fit_ref    0.984 
_refine_ls_restrained_S_all       0.984 
_refine_ls_shift/su_max           0.000 
_refine_ls_shift/su_mean          0.000 
  
loop_ 
 _atom_site_label 
 _atom_site_type_symbol 
 _atom_site_fract_x 
 _atom_site_fract_y 
 _atom_site_fract_z 
 _atom_site_U_iso_or_equiv 
 _atom_site_adp_type 
 _atom_site_occupancy 
 _atom_site_site_symmetry_order 
 _atom_site_calc_flag 
 _atom_site_refinement_flags_posn 
 _atom_site_refinement_flags_adp 
 _atom_site_refinement_flags_occupancy 
 _atom_site_disorder_assembly 
 _atom_site_disorder_group 
O1A O 0.5457(2) 0.8707(2) 0.38415(19) 0.0321(7) Uani 1 1 d . . . . . 
N1A N 0.3979(3) 0.4451(2) 0.2573(2) 0.0275(8) Uani 1 1 d . . . . . 
H1AA H 0.4236 0.4712 0.2188 0.033 Uiso 1 1 calc R U . . . 
N2A N 0.5101(3) 0.6195(2) 0.3660(2) 0.0215(8) Uani 1 1 d . . . . . 
N3A N 0.5035(3) 0.6586(2) 0.5203(2) 0.0207(7) Uani 1 1 d . . . . . 
N4A N 0.3913(3) 0.4796(2) 0.4042(2) 0.0209(7) Uani 1 1 d . . . . . 
N5A N 0.6202(3) 0.7887(2) 0.4812(2) 0.0224(8) Uani 1 1 d . . . . . 
H5AA H 0.6419 0.8347 0.5382 0.027 Uiso 1 1 calc R U . . . 
N6A N 0.6667(3) 0.8217(2) 0.4189(2) 0.0235(8) Uani 1 1 d . . . . . 
H6AA H 0.7276 0.8212 0.4119 0.028 Uiso 1 1 calc R U . . . 
N7A N 0.3792(3) 0.5163(2) 0.5495(2) 0.0192(7) Uani 1 1 d . . . . . 
N8A N 0.2986(3) 0.4144(2) 0.5226(2) 0.0212(7) Uani 1 1 d . . . . . 
N9A N 0.4056(3) 0.5787(3) 0.6377(2) 0.0253(8) Uani 1 1 d . . . . . 
N10A N 0.3405(3) 0.5160(3) 0.6710(2) 0.0253(8) Uani 1 1 d . . . . . 
C1A C 0.3233(3) 0.2502(3) 0.2710(3) 0.0249(9) Uani 1 1 d . . . . . 
H1A H 0.3808 0.2867 0.3290 0.030 Uiso 1 1 d R U . . . 
C2A C 0.2168(3) 0.2682(3) 0.2635(3) 0.0313(11) Uani 1 1 d . . . . . 
H2A H 0.2075 0.3146 0.3159 0.038 Uiso 1 1 d R U . . . 
B3A B 0.3202(4) 0.3289(4) 0.2184(3) 0.0278(11) Uani 1 1 d . . . . . 
B4A B 0.3620(5) 0.2343(4) 0.1750(3) 0.0322(12) Uani 1 1 d . . . . . 
H4A H 0.4493 0.2605 0.1722 0.039 Uiso 1 1 calc R U . . . 
B5A B 0.2862(4) 0.1235(4) 0.2004(3) 0.0325(12) Uani 1 1 d . . . . . 
H5A H 0.3233 0.0772 0.2140 0.039 Uiso 1 1 calc R U . . . 
B6A B 0.1966(4) 0.1487(4) 0.2612(4) 0.0353(13) Uani 1 1 d . . . . . 
H6A H 0.1752 0.1213 0.3157 0.042 Uiso 1 1 calc R U . . . 
B7A B 0.1766(4) 0.2661(4) 0.1613(4) 0.0445(15) Uani 1 1 d . . . . . 
H7A H 0.1394 0.3130 0.1494 0.053 Uiso 1 1 calc R U . . . 
B8A B 0.2700(5) 0.2434(4) 0.1026(3) 0.0422(15) Uani 1 1 d . . . . . 
H8A H 0.2952 0.2753 0.0513 0.051 Uiso 1 1 calc R U . . . 
B9A B 0.2471(5) 0.1147(4) 0.0909(3) 0.0426(15) Uani 1 1 d . . . . . 
H9A H 0.2567 0.0611 0.0306 0.051 Uiso 1 1 calc R U . . . 
B10A B 0.1441(4) 0.0608(4) 0.1438(3) 0.0371(13) Uani 1 1 d . . . . . 
H10A H 0.0862 -0.0274 0.1194 0.044 Uiso 1 1 calc R U . . . 
B11A B 0.1011(4) 0.1544(4) 0.1863(4) 0.0444(16) Uani 1 1 d . . . . . 
H11A H 0.0143 0.1283 0.1903 0.053 Uiso 1 1 calc R U . . . 
B12A B 0.1328(5) 0.1339(4) 0.0817(4) 0.0520(17) Uani 1 1 d . . . . . 
H12A H 0.0673 0.0935 0.0155 0.062 Uiso 1 1 calc R U . . . 
C3A C 0.4347(3) 0.5169(3) 0.3447(3) 0.0219(9) Uani 1 1 d . . . . . 
C4A C 0.5412(3) 0.6853(3) 0.4540(2) 0.0181(8) Uani 1 1 d . . . . . 
C5A C 0.4292(3) 0.5548(3) 0.4868(3) 0.0203(9) Uani 1 1 d . . . . . 
C6A C 0.6210(3) 0.8552(3) 0.3680(2) 0.0208(9) Uani 1 1 d . . . . . 
C7A C 0.6705(3) 0.8724(3) 0.2949(3) 0.0246(9) Uani 1 1 d . . . . . 
C8A C 0.6124(4) 0.8814(3) 0.2272(3) 0.0339(11) Uani 1 1 d . . . . . 
H8AA H 0.5440 0.8784 0.2301 0.041 Uiso 1 1 calc R U . . . 
C9A C 0.6534(4) 0.8946(4) 0.1559(3) 0.0386(12) Uani 1 1 d . . . . . 
H9AA H 0.6122 0.8991 0.1096 0.046 Uiso 1 1 calc R U . . . 
C10A C 0.7531(4) 0.9014(4) 0.1518(3) 0.0406(12) Uani 1 1 d . . . . . 
H10C H 0.7807 0.9101 0.1027 0.049 Uiso 1 1 calc R U . . . 
C11A C 0.8141(4) 0.8954(4) 0.2199(3) 0.0418(12) Uani 1 1 d . . . . . 
H11C H 0.8840 0.9016 0.2180 0.050 Uiso 1 1 calc R U . . . 
C12A C 0.7717(4) 0.8802(3) 0.2903(3) 0.0340(11) Uani 1 1 d . . . . . 
H12C H 0.8127 0.8751 0.3362 0.041 Uiso 1 1 calc R U . . . 
C13A C 0.2757(3) 0.4162(3) 0.5999(3) 0.0219(9) Uani 1 1 d . . . . . 
C14A C 0.1883(3) 0.3233(3) 0.6073(3) 0.0254(10) Uani 1 1 d . . . . . 
C15A C 0.1636(4) 0.3331(4) 0.6885(3) 0.0345(11) Uani 1 1 d . . . . . 
H15A H 0.2075 0.3986 0.7412 0.041 Uiso 1 1 calc R U . . . 
C16A C 0.0746(4) 0.2469(4) 0.6930(4) 0.0426(13) Uani 1 1 d . . . . . 
H16A H 0.0572 0.2541 0.7487 0.051 Uiso 1 1 calc R U . . . 
C17A C 0.0111(4) 0.1503(4) 0.6166(4) 0.0442(13) Uani 1 1 d . . . . . 
H17A H -0.0503 0.0920 0.6197 0.053 Uiso 1 1 calc R U . . . 
C18A C 0.0376(4) 0.1395(4) 0.5357(4) 0.0387(12) Uani 1 1 d . . . . . 
H18A H -0.0048 0.0729 0.4838 0.046 Uiso 1 1 calc R U . . . 
C19A C 0.1258(3) 0.2252(3) 0.5300(3) 0.0306(10) Uani 1 1 d . . . . . 
H19A H 0.1436 0.2175 0.4745 0.037 Uiso 1 1 calc R U . . . 
O1B O 0.7206(2) 0.9881(2) 0.63513(18) 0.0308(7) Uani 1 1 d . . . . . 
N1B N 0.4064(3) 0.8838(3) 0.8015(2) 0.0244(8) Uani 1 1 d . . . . . 
H1BA H 0.4606 0.9497 0.8361 0.029 Uiso 1 1 calc R U . . . 
N2B N 0.4670(3) 0.9215(3) 0.6848(2) 0.0240(8) Uani 1 1 d . . . . . 
N3B N 0.3750(3) 0.7812(3) 0.5325(2) 0.0235(8) Uani 1 1 d . . . . . 
N4B N 0.3199(3) 0.7464(2) 0.6569(2) 0.0216(8) Uani 1 1 d . . . . . 
N5B N 0.5172(3) 0.9468(3) 0.5605(2) 0.0249(8) Uani 1 1 d . . . . . 
H5BA H 0.5046 0.9245 0.5015 0.030 Uiso 1 1 calc R U . . . 
N6B N 0.6029(3) 1.0476(3) 0.6178(2) 0.0271(8) Uani 1 1 d . . . . . 
H6BA H 0.5941 1.1030 0.6291 0.032 Uiso 1 1 calc R U . . . 
N7B N 0.2339(3) 0.6139(3) 0.5099(2) 0.0221(8) Uani 1 1 d . . . . . 
N8B N 0.1631(3) 0.5450(2) 0.5370(2) 0.0230(8) Uani 1 1 d . . . . . 
N9B N 0.2191(3) 0.5731(3) 0.4202(2) 0.0318(9) Uani 1 1 d . . . . . 
N10B N 0.1367(3) 0.4736(3) 0.3878(2) 0.0304(9) Uani 1 1 d . . . . . 
C1B C 0.2072(3) 0.7172(3) 0.7960(3) 0.0277(10) Uani 1 1 d . . . . . 
H1B H 0.1772 0.6983 0.7320 0.033 Uiso 1 1 d R U . . . 
C2B C 0.3069(3) 0.6985(3) 0.8289(3) 0.0270(10) Uani 1 1 d . . . . . 
H2B H 0.3363 0.6641 0.7853 0.032 Uiso 1 1 d R U . . . 
B3B B 0.3390(4) 0.8269(4) 0.8488(3) 0.0251(11) Uani 1 1 d . . . . . 
B4B B 0.2191(4) 0.8292(4) 0.8740(3) 0.0268(11) Uani 1 1 d . . . . . 
H4B H 0.1928 0.8817 0.8581 0.032 Uiso 1 1 calc R U . . . 
B5B B 0.1187(4) 0.6995(4) 0.8612(3) 0.0348(13) Uani 1 1 d . . . . . 
H5B H 0.0274 0.6670 0.8373 0.042 Uiso 1 1 calc R U . . . 
B6B B 0.1762(4) 0.6157(4) 0.8286(4) 0.0344(13) Uani 1 1 d . . . . . 
H6B H 0.1235 0.5284 0.7820 0.041 Uiso 1 1 calc R U . . . 
B7B B 0.3967(4) 0.7967(4) 0.9309(3) 0.0309(12) Uani 1 1 d . . . . . 
H7B H 0.4877 0.8271 0.9526 0.037 Uiso 1 1 calc R U . . . 
B8B B 0.3393(4) 0.8814(4) 0.9629(3) 0.0277(11) Uani 1 1 d . . . . . 
H8B H 0.3934 0.9692 1.0073 0.033 Uiso 1 1 calc R U . . . 
B9B B 0.2036(4) 0.8045(4) 0.9706(3) 0.0309(12) Uani 1 1 d . . . . . 
H9B H 0.1683 0.8418 1.0200 0.037 Uiso 1 1 calc R U . . . 
B10B B 0.1764(5) 0.6701(4) 0.9427(4) 0.0386(14) Uani 1 1 d . . . . . 
H10B H 0.1232 0.6187 0.9735 0.046 Uiso 1 1 calc R U . . . 
B11B B 0.2952(4) 0.6677(4) 0.9188(3) 0.0332(12) Uani 1 1 d . . . . . 
H11B H 0.3205 0.6138 0.9331 0.040 Uiso 1 1 calc R U . . . 
B12B B 0.3132(5) 0.7834(4) 1.0061(4) 0.0335(13) Uani 1 1 d . . . . . 
H12B H 0.3498 0.8068 1.0792 0.040 Uiso 1 1 calc R U . . . 
C3B C 0.3976(3) 0.8500(3) 0.7115(3) 0.0230(9) Uani 1 1 d . . . . . 
C4B C 0.4518(3) 0.8813(3) 0.5951(3) 0.0230(9) Uani 1 1 d . . . . . 
C5B C 0.3168(3) 0.7233(3) 0.5712(3) 0.0215(9) Uani 1 1 d . . . . . 
C6B C 0.7015(4) 1.0621(3) 0.6570(3) 0.0263(10) Uani 1 1 d . . . . . 
C7B C 0.7846(4) 1.1722(3) 0.7262(3) 0.0377(12) Uani 1 1 d . . . . . 
C8B C 0.8557(4) 1.1818(4) 0.7977(3) 0.0473(14) Uani 1 1 d . . . . . 
H8BA H 0.8498 1.1194 0.8009 0.057 Uiso 1 1 calc R U . . . 
C9B C 0.9348(4) 1.2815(5) 0.8641(4) 0.072(2) Uani 1 1 d . . . . . 
H9BA H 0.9822 1.2886 0.9142 0.086 Uiso 1 1 calc R U . . . 
C10B C 0.9437(6) 1.3711(5) 0.8562(5) 0.099(3) Uani 1 1 d . . . . . 
H10D H 0.9994 1.4401 0.9007 0.119 Uiso 1 1 calc R U . . . 
C11B C 0.8742(7) 1.3631(4) 0.7859(5) 0.093(3) Uani 1 1 d . . . . . 
H11D H 0.8820 1.4260 0.7825 0.111 Uiso 1 1 calc R U . . . 
C12B C 0.7923(5) 1.2630(4) 0.7196(4) 0.0578(16) Uani 1 1 d . . . . . 
H12D H 0.7430 1.2565 0.6711 0.069 Uiso 1 1 calc R U . . . 
C13B C 0.1031(3) 0.4580(3) 0.4596(3) 0.0257(10) Uani 1 1 d . . . . . 
C14B C 0.0114(3) 0.3566(3) 0.4521(3) 0.0258(10) Uani 1 1 d . . . . . 
C15B C -0.0409(3) 0.2663(3) 0.3682(3) 0.0327(11) Uani 1 1 d . . . . . 
H15B H -0.0170 0.2700 0.3165 0.039 Uiso 1 1 calc R U . . . 
C16B C -0.1281(4) 0.1715(3) 0.3621(3) 0.0345(11) Uani 1 1 d . . . . . 
H16B H -0.1634 0.1098 0.3059 0.041 Uiso 1 1 calc R U . . . 
C17B C -0.1640(4) 0.1659(3) 0.4363(3) 0.0361(11) Uani 1 1 d . . . . . 
H17B H -0.2245 0.1008 0.4310 0.043 Uiso 1 1 calc R U . . . 
C18B C -0.1117(4) 0.2555(3) 0.5192(3) 0.0345(11) Uani 1 1 d . . . . . 
H18B H -0.1363 0.2513 0.5705 0.041 Uiso 1 1 calc R U . . . 
C19B C -0.0242(3) 0.3506(3) 0.5272(3) 0.0291(10) Uani 1 1 d . . . . . 
H19B H 0.0115 0.4116 0.5840 0.035 Uiso 1 1 calc R U . . . 
  
loop_ 
 _atom_site_aniso_label 
 _atom_site_aniso_U_11 
 _atom_site_aniso_U_22 
 _atom_site_aniso_U_33 
 _atom_site_aniso_U_23 
 _atom_site_aniso_U_13 
 _atom_site_aniso_U_12 
O1A 0.0393(18) 0.0418(18) 0.0319(17) 0.0179(14) 0.0175(14) 0.0305(16) 
N1A 0.033(2) 0.0266(19) 0.0165(19) 0.0045(16) 0.0066(15) 0.0143(18) 
N2A 0.0241(19) 0.0191(18) 0.0217(19) 0.0072(15) 0.0047(15) 0.0127(16) 
N3A 0.0274(19) 0.0233(19) 0.0179(18) 0.0094(15) 0.0075(15) 0.0173(17) 
N4A 0.0227(18) 0.0206(17) 0.0177(18) 0.0058(15) 0.0036(15) 0.0118(16) 
N5A 0.034(2) 0.0181(18) 0.0155(18) 0.0073(14) 0.0086(15) 0.0129(17) 
N6A 0.0257(19) 0.0261(19) 0.028(2) 0.0154(16) 0.0112(16) 0.0168(17) 
N7A 0.0218(18) 0.0213(18) 0.0170(18) 0.0067(15) 0.0066(14) 0.0138(16) 
N8A 0.0198(18) 0.0195(18) 0.028(2) 0.0120(15) 0.0085(15) 0.0109(16) 
N9A 0.029(2) 0.030(2) 0.0216(19) 0.0102(16) 0.0105(16) 0.0188(17) 
N10A 0.029(2) 0.0277(19) 0.029(2) 0.0148(17) 0.0157(17) 0.0184(18) 
C1A 0.025(2) 0.025(2) 0.022(2) 0.0093(18) 0.0061(18) 0.011(2) 
C2A 0.021(2) 0.027(2) 0.035(3) 0.003(2) 0.0052(19) 0.012(2) 
B3A 0.033(3) 0.026(3) 0.018(3) 0.003(2) -0.002(2) 0.017(2) 
B4A 0.045(3) 0.032(3) 0.023(3) 0.010(2) 0.014(2) 0.022(3) 
B5A 0.040(3) 0.027(3) 0.029(3) 0.010(2) 0.007(2) 0.018(3) 
B6A 0.033(3) 0.022(3) 0.036(3) 0.006(2) 0.008(2) 0.008(2) 
B7A 0.034(3) 0.031(3) 0.048(4) 0.002(3) -0.015(3) 0.016(3) 
B8A 0.068(4) 0.031(3) 0.017(3) 0.002(2) -0.001(3) 0.026(3) 
B9A 0.070(4) 0.031(3) 0.022(3) 0.005(2) 0.004(3) 0.028(3) 
B10A 0.038(3) 0.023(3) 0.031(3) 0.002(2) -0.008(2) 0.012(3) 
B11A 0.017(3) 0.022(3) 0.069(4) 0.006(3) -0.009(3) 0.004(2) 
B12A 0.052(4) 0.027(3) 0.045(4) 0.001(3) -0.018(3) 0.011(3) 
C3A 0.023(2) 0.028(2) 0.020(2) 0.0089(19) 0.0066(18) 0.018(2) 
C4A 0.019(2) 0.019(2) 0.019(2) 0.0066(17) 0.0040(17) 0.0132(18) 
C5A 0.023(2) 0.026(2) 0.022(2) 0.0112(19) 0.0056(18) 0.020(2) 
C6A 0.027(2) 0.016(2) 0.017(2) 0.0044(17) 0.0055(18) 0.0120(19) 
C7A 0.035(2) 0.026(2) 0.024(2) 0.0116(19) 0.0127(19) 0.024(2) 
C8A 0.045(3) 0.035(3) 0.029(3) 0.014(2) 0.011(2) 0.026(2) 
C9A 0.058(3) 0.041(3) 0.024(3) 0.017(2) 0.011(2) 0.029(3) 
C10A 0.067(4) 0.041(3) 0.032(3) 0.020(2) 0.032(3) 0.035(3) 
C11A 0.055(3) 0.048(3) 0.042(3) 0.025(3) 0.027(3) 0.035(3) 
C12A 0.048(3) 0.045(3) 0.031(3) 0.024(2) 0.022(2) 0.034(3) 
C13A 0.022(2) 0.027(2) 0.028(2) 0.0128(19) 0.0119(19) 0.020(2) 
C14A 0.024(2) 0.026(2) 0.040(3) 0.018(2) 0.016(2) 0.020(2) 
C15A 0.041(3) 0.035(3) 0.046(3) 0.024(2) 0.028(2) 0.027(2) 
C16A 0.046(3) 0.051(3) 0.064(4) 0.038(3) 0.039(3) 0.037(3) 
C17A 0.028(3) 0.039(3) 0.088(4) 0.042(3) 0.024(3) 0.022(2) 
C18A 0.026(3) 0.028(3) 0.065(4) 0.025(2) 0.005(2) 0.014(2) 
C19A 0.030(3) 0.030(2) 0.045(3) 0.023(2) 0.014(2) 0.020(2) 
O1B 0.0296(17) 0.0271(16) 0.0281(17) 0.0067(13) 0.0035(13) 0.0133(14) 
N1B 0.0248(19) 0.0222(18) 0.0177(19) 0.0081(15) 0.0076(15) 0.0056(16) 
N2B 0.0276(19) 0.0270(19) 0.025(2) 0.0147(16) 0.0134(16) 0.0163(17) 
N3B 0.0243(19) 0.0247(19) 0.026(2) 0.0124(16) 0.0104(16) 0.0143(17) 
N4B 0.0248(19) 0.0230(19) 0.0190(19) 0.0086(15) 0.0087(15) 0.0136(16) 
N5B 0.027(2) 0.028(2) 0.0188(19) 0.0095(16) 0.0080(15) 0.0135(17) 
N6B 0.036(2) 0.0213(19) 0.031(2) 0.0129(16) 0.0133(17) 0.0184(18) 
N7B 0.0234(19) 0.0271(19) 0.0205(19) 0.0110(16) 0.0066(15) 0.0157(17) 
N8B 0.0202(18) 0.0244(19) 0.028(2) 0.0119(17) 0.0087(16) 0.0136(16) 
N9B 0.038(2) 0.035(2) 0.021(2) 0.0078(17) 0.0110(17) 0.020(2) 
N10B 0.033(2) 0.030(2) 0.025(2) 0.0078(17) 0.0078(17) 0.0163(19) 
C1B 0.026(2) 0.024(2) 0.027(2) 0.0069(19) 0.0058(19) 0.011(2) 
C2B 0.041(3) 0.024(2) 0.024(2) 0.0073(18) 0.015(2) 0.023(2) 
B3B 0.024(3) 0.021(2) 0.023(3) 0.006(2) 0.003(2) 0.009(2) 
B4B 0.027(3) 0.032(3) 0.030(3) 0.014(2) 0.015(2) 0.019(2) 
B5B 0.031(3) 0.030(3) 0.037(3) 0.011(2) 0.019(2) 0.011(3) 
B6B 0.041(3) 0.019(3) 0.038(3) 0.014(2) 0.021(3) 0.009(2) 
B7B 0.038(3) 0.032(3) 0.025(3) 0.011(2) 0.013(2) 0.020(3) 
B8B 0.031(3) 0.026(3) 0.027(3) 0.012(2) 0.014(2) 0.015(2) 
B9B 0.036(3) 0.024(3) 0.031(3) 0.012(2) 0.016(2) 0.013(2) 
B10B 0.056(4) 0.021(3) 0.040(3) 0.011(2) 0.027(3) 0.019(3) 
B11B 0.045(3) 0.035(3) 0.032(3) 0.019(2) 0.020(3) 0.025(3) 
B12B 0.052(4) 0.029(3) 0.031(3) 0.019(2) 0.021(3) 0.024(3) 
C3B 0.021(2) 0.026(2) 0.028(2) 0.012(2) 0.0093(18) 0.016(2) 
C4B 0.026(2) 0.032(2) 0.029(2) 0.019(2) 0.0155(19) 0.023(2) 
C5B 0.020(2) 0.025(2) 0.027(2) 0.0107(19) 0.0071(18) 0.017(2) 
C6B 0.033(3) 0.023(2) 0.024(2) 0.0113(19) 0.017(2) 0.013(2) 
C7B 0.040(3) 0.026(2) 0.033(3) 0.008(2) 0.026(2) 0.006(2) 
C8B 0.032(3) 0.046(3) 0.025(3) 0.001(2) 0.010(2) 0.000(2) 
C9B 0.044(3) 0.067(4) 0.033(3) 0.000(3) 0.021(3) -0.012(3) 
C10B 0.089(6) 0.050(4) 0.050(4) -0.015(4) 0.046(4) -0.028(4) 
C11B 0.133(7) 0.024(3) 0.077(5) 0.010(3) 0.068(5) 0.006(4) 
C12B 0.087(4) 0.029(3) 0.056(4) 0.019(3) 0.047(3) 0.022(3) 
C13B 0.028(2) 0.028(2) 0.023(2) 0.006(2) 0.0031(19) 0.021(2) 
C14B 0.019(2) 0.027(2) 0.031(3) 0.012(2) 0.0030(19) 0.013(2) 
C15B 0.032(3) 0.038(3) 0.029(3) 0.011(2) 0.004(2) 0.022(2) 
C16B 0.036(3) 0.028(3) 0.034(3) 0.007(2) 0.000(2) 0.018(2) 
C17B 0.029(3) 0.030(3) 0.048(3) 0.013(2) 0.000(2) 0.019(2) 
C18B 0.034(3) 0.035(3) 0.042(3) 0.018(2) 0.013(2) 0.022(2) 
C19B 0.028(2) 0.028(2) 0.032(3) 0.010(2) 0.005(2) 0.017(2) 
  
_geom_special_details 
; 
 All esds (except the esd in the dihedral angle between two l.s. planes) 
 are estimated using the full covariance matrix.  The cell esds are taken 
 into account individually in the estimation of esds in distances, angles 
 and torsion angles; correlations between esds in cell parameters are only 
 used when they are defined by crystal symmetry.  An approximate (isotropic) 
 treatment of cell esds is used for estimating esds involving l.s. planes. 
; 
  
loop_ 
 _geom_bond_atom_site_label_1 
 _geom_bond_atom_site_label_2 
 _geom_bond_distance 
 _geom_bond_site_symmetry_2 
 _geom_bond_publ_flag 
O1A C6A 1.221(4) . ? 
N1A C3A 1.349(5) . ? 
N1A B3A 1.470(6) . ? 
N1A H1AA 0.8800 . ? 
N2A C4A 1.340(4) . ? 
N2A C3A 1.345(5) . ? 
N3A C5A 1.327(5) . ? 
N3A C4A 1.358(5) . ? 
N4A C5A 1.309(5) . ? 
N4A C3A 1.353(5) . ? 
N5A C4A 1.349(5) . ? 
N5A N6A 1.381(4) . ? 
N5A H5AA 0.8800 . ? 
N6A C6A 1.364(5) . ? 
N6A H6AA 0.8800 . ? 
N7A N9A 1.339(4) . ? 
N7A N8A 1.339(4) . ? 
N7A C5A 1.442(5) . ? 
N8A C13A 1.331(5) . ? 
N9A N10A 1.313(4) . ? 
N10A C13A 1.377(5) . ? 
C1A C2A 1.645(6) . ? 
C1A B4A 1.688(6) . ? 
C1A B5A 1.698(6) . ? 
C1A B6A 1.714(6) . ? 
C1A B3A 1.723(6) . ? 
C1A H1A 0.9799 . ? 
C2A B7A 1.699(7) . ? 
C2A B11A 1.700(6) . ? 
C2A B6A 1.722(7) . ? 
C2A B3A 1.730(7) . ? 
C2A H2A 0.9800 . ? 
B3A B8A 1.750(7) . ? 
B3A B4A 1.771(7) . ? 
B3A B7A 1.784(7) . ? 
B4A B8A 1.757(7) . ? 
B4A B9A 1.765(7) . ? 
B4A B5A 1.779(7) . ? 
B4A H4A 1.1200 . ? 
B5A B10A 1.764(7) . ? 
B5A B9A 1.766(7) . ? 
B5A B6A 1.777(7) . ? 
B5A H5A 1.1200 . ? 
B6A B10A 1.778(7) . ? 
B6A B11A 1.786(8) . ? 
B6A H6A 1.1200 . ? 
B7A B12A 1.781(7) . ? 
B7A B11A 1.784(8) . ? 
B7A B8A 1.790(9) . ? 
B7A H7A 1.1200 . ? 
B8A B9A 1.802(7) . ? 
B8A B12A 1.807(8) . ? 
B8A H8A 1.1200 . ? 
B9A B12A 1.766(9) . ? 
B9A B10A 1.786(8) . ? 
B9A H9A 1.1200 . ? 
B10A B11A 1.769(7) . ? 
B10A B12A 1.801(8) . ? 
B10A H10A 1.1200 . ? 
B11A B12A 1.772(9) . ? 
B11A H11A 1.1200 . ? 
B12A H12A 1.1200 . ? 
C6A C7A 1.482(5) . ? 
C7A C12A 1.386(6) . ? 
C7A C8A 1.398(6) . ? 
C8A C9A 1.386(6) . ? 
C8A H8AA 0.9500 . ? 
C9A C10A 1.372(6) . ? 
C9A H9AA 0.9500 . ? 
C10A C11A 1.396(6) . ? 
C10A H10C 0.9500 . ? 
C11A C12A 1.389(6) . ? 
C11A H11C 0.9500 . ? 
C12A H12C 0.9500 . ? 
C13A C14A 1.465(5) . ? 
C14A C15A 1.383(6) . ? 
C14A C19A 1.405(6) . ? 
C15A C16A 1.392(6) . ? 
C15A H15A 0.9500 . ? 
C16A C17A 1.388(7) . ? 
C16A H16A 0.9500 . ? 
C17A C18A 1.386(7) . ? 
C17A H17A 0.9500 . ? 
C18A C19A 1.392(6) . ? 
C18A H18A 0.9500 . ? 
C19A H19A 0.9500 . ? 
O1B C6B 1.235(5) . ? 
N1B C3B 1.359(5) . ? 
N1B B3B 1.457(6) . ? 
N1B H1BA 0.8800 . ? 
N2B C4B 1.341(5) . ? 
N2B C3B 1.343(5) . ? 
N3B C5B 1.302(5) . ? 
N3B C4B 1.355(5) . ? 
N4B C5B 1.318(5) . ? 
N4B C3B 1.355(5) . ? 
N5B C4B 1.356(5) . ? 
N5B N6B 1.372(4) . ? 
N5B H5BA 0.8800 . ? 
N6B C6B 1.359(5) . ? 
N6B H6BA 0.8800 . ? 
N7B N8B 1.332(4) . ? 
N7B N9B 1.341(4) . ? 
N7B C5B 1.447(5) . ? 
N8B C13B 1.327(5) . ? 
N9B N10B 1.313(5) . ? 
N10B C13B 1.364(5) . ? 
C1B C2B 1.636(6) . ? 
C1B B4B 1.692(6) . ? 
C1B B5B 1.707(6) . ? 
C1B B6B 1.711(6) . ? 
C1B B3B 1.720(6) . ? 
C1B H1B 0.9799 . ? 
C2B B11B 1.692(6) . ? 
C2B B7B 1.693(6) . ? 
C2B B6B 1.706(6) . ? 
C2B B3B 1.726(6) . ? 
C2B H2B 0.9800 . ? 
B3B B8B 1.771(6) . ? 
B3B B4B 1.790(6) . ? 
B3B B7B 1.800(7) . ? 
B4B B9B 1.759(7) . ? 
B4B B8B 1.778(7) . ? 
B4B B5B 1.782(7) . ? 
B4B H4B 1.1200 . ? 
B5B B9B 1.780(7) . ? 
B5B B6B 1.782(7) . ? 
B5B B10B 1.783(8) . ? 
B5B H5B 1.1200 . ? 
B6B B10B 1.772(7) . ? 
B6B B11B 1.780(8) . ? 
B6B H6B 1.1200 . ? 
B7B B12B 1.780(7) . ? 
B7B B11B 1.782(7) . ? 
B7B B8B 1.790(7) . ? 
B7B H7B 1.1200 . ? 
B8B B9B 1.787(7) . ? 
B8B B12B 1.787(7) . ? 
B8B H8B 1.1200 . ? 
B9B B12B 1.799(7) . ? 
B9B B10B 1.810(7) . ? 
B9B H9B 1.1200 . ? 
B10B B11B 1.769(7) . ? 
B10B B12B 1.797(8) . ? 
B10B H10B 1.1200 . ? 
B11B B12B 1.763(7) . ? 
B11B H11B 1.1200 . ? 
B12B H12B 1.1200 . ? 
C6B C7B 1.489(6) . ? 
C7B C8B 1.387(7) . ? 
C7B C12B 1.398(6) . ? 
C8B C9B 1.379(7) . ? 
C8B H8BA 0.9500 . ? 
C9B C10B 1.383(10) . ? 
C9B H9BA 0.9500 . ? 
C10B C11B 1.372(10) . ? 
C10B H10D 0.9500 . ? 
C11B C12B 1.391(8) . ? 
C11B H11D 0.9500 . ? 
C12B H12D 0.9500 . ? 
C13B C14B 1.471(6) . ? 
C14B C19B 1.387(6) . ? 
C14B C15B 1.405(5) . ? 
C15B C16B 1.388(6) . ? 
C15B H15B 0.9500 . ? 
C16B C17B 1.375(6) . ? 
C16B H16B 0.9500 . ? 
C17B C18B 1.390(6) . ? 
C17B H17B 0.9500 . ? 
C18B C19B 1.382(6) . ? 
C18B H18B 0.9500 . ? 
C19B H19B 0.9500 . ? 
  
loop_ 
 _geom_angle_atom_site_label_1 
 _geom_angle_atom_site_label_2 
 _geom_angle_atom_site_label_3 
 _geom_angle 
 _geom_angle_site_symmetry_1 
 _geom_angle_site_symmetry_3 
 _geom_angle_publ_flag 
C3A N1A B3A 128.3(4) . . ? 
C3A N1A H1AA 115.9 . . ? 
B3A N1A H1AA 115.9 . . ? 
C4A N2A C3A 114.1(3) . . ? 
C5A N3A C4A 110.6(3) . . ? 
C5A N4A C3A 112.9(3) . . ? 
C4A N5A N6A 119.4(3) . . ? 
C4A N5A H5AA 120.3 . . ? 
N6A N5A H5AA 120.3 . . ? 
C6A N6A N5A 122.0(3) . . ? 
C6A N6A H6AA 119.0 . . ? 
N5A N6A H6AA 119.0 . . ? 
N9A N7A N8A 114.6(3) . . ? 
N9A N7A C5A 123.6(3) . . ? 
N8A N7A C5A 121.8(3) . . ? 
C13A N8A N7A 101.2(3) . . ? 
N10A N9A N7A 105.5(3) . . ? 
N9A N10A C13A 106.6(3) . . ? 
C2A C1A B4A 111.2(3) . . ? 
C2A C1A B5A 111.2(3) . . ? 
B4A C1A B5A 63.4(3) . . ? 
C2A C1A B6A 61.6(3) . . ? 
B4A C1A B6A 115.6(3) . . ? 
B5A C1A B6A 62.8(3) . . ? 
C2A C1A B3A 61.7(3) . . ? 
B4A C1A B3A 62.5(3) . . ? 
B5A C1A B3A 115.4(3) . . ? 
B6A C1A B3A 115.7(3) . . ? 
C2A C1A H1A 120.5 . . ? 
B4A C1A H1A 118.6 . . ? 
B5A C1A H1A 118.9 . . ? 
B6A C1A H1A 116.8 . . ? 
B3A C1A H1A 116.5 . . ? 
C1A C2A B7A 111.1(3) . . ? 
C1A C2A B11A 110.5(3) . . ? 
B7A C2A B11A 63.3(3) . . ? 
C1A C2A B6A 61.1(3) . . ? 
B7A C2A B6A 115.8(3) . . ? 
B11A C2A B6A 62.9(3) . . ? 
C1A C2A B3A 61.3(3) . . ? 
B7A C2A B3A 62.7(3) . . ? 
B11A C2A B3A 114.8(4) . . ? 
B6A C2A B3A 114.9(3) . . ? 
C1A C2A H2A 122.1 . . ? 
B7A C2A H2A 117.5 . . ? 
B11A C2A H2A 118.0 . . ? 
B6A C2A H2A 117.1 . . ? 
B3A C2A H2A 117.6 . . ? 
N1A B3A C1A 122.8(3) . . ? 
N1A B3A C2A 123.5(4) . . ? 
C1A B3A C2A 56.9(2) . . ? 
N1A B3A B8A 124.9(4) . . ? 
C1A B3A B8A 104.3(3) . . ? 
C2A B3A B8A 104.8(4) . . ? 
N1A B3A B4A 122.7(4) . . ? 
C1A B3A B4A 57.8(2) . . ? 
C2A B3A B4A 103.6(3) . . ? 
B8A B3A B4A 59.9(3) . . ? 
N1A B3A B7A 123.7(4) . . ? 
C1A B3A B7A 103.7(4) . . ? 
C2A B3A B7A 57.8(3) . . ? 
B8A B3A B7A 60.9(3) . . ? 
B4A B3A B7A 107.6(3) . . ? 
C1A B4A B8A 105.5(4) . . ? 
C1A B4A B9A 104.6(4) . . ? 
B8A B4A B9A 61.5(3) . . ? 
C1A B4A B3A 59.7(3) . . ? 
B8A B4A B3A 59.5(3) . . ? 
B9A B4A B3A 108.7(4) . . ? 
C1A B4A B5A 58.6(3) . . ? 
B8A B4A B5A 109.6(4) . . ? 
B9A B4A B5A 59.8(3) . . ? 
B3A B4A B5A 109.1(4) . . ? 
C1A B4A H4A 124.7 . . ? 
B8A B4A H4A 121.5 . . ? 
B9A B4A H4A 122.1 . . ? 
B3A B4A H4A 121.0 . . ? 
B5A B4A H4A 120.9 . . ? 
C1A B5A B10A 105.1(4) . . ? 
C1A B5A B9A 104.1(4) . . ? 
B10A B5A B9A 60.8(3) . . ? 
C1A B5A B6A 59.1(3) . . ? 
B10A B5A B6A 60.3(3) . . ? 
B9A B5A B6A 108.7(4) . . ? 
C1A B5A B4A 58.0(3) . . ? 
B10A B5A B4A 108.6(4) . . ? 
B9A B5A B4A 59.7(3) . . ? 
B6A B5A B4A 108.1(4) . . ? 
C1A B5A H5A 125.1 . . ? 
B10A B5A H5A 121.7 . . ? 
B9A B5A H5A 122.3 . . ? 
B6A B5A H5A 121.0 . . ? 
B4A B5A H5A 121.7 . . ? 
C1A B6A C2A 57.2(2) . . ? 
C1A B6A B5A 58.2(3) . . ? 
C2A B6A B5A 104.1(4) . . ? 
C1A B6A B10A 103.8(4) . . ? 
C2A B6A B10A 103.9(4) . . ? 
B5A B6A B10A 59.5(3) . . ? 
C1A B6A B11A 103.6(4) . . ? 
C2A B6A B11A 57.9(3) . . ? 
B5A B6A B11A 106.6(4) . . ? 
B10A B6A B11A 59.5(3) . . ? 
C1A B6A H6A 125.0 . . ? 
C2A B6A H6A 124.8 . . ? 
B5A B6A H6A 122.8 . . ? 
B10A B6A H6A 123.5 . . ? 
B11A B6A H6A 123.1 . . ? 
C2A B7A B12A 104.2(4) . . ? 
C2A B7A B3A 59.5(3) . . ? 
B12A B7A B3A 107.5(4) . . ? 
C2A B7A B11A 58.4(3) . . ? 
B12A B7A B11A 59.6(3) . . ? 
B3A B7A B11A 108.2(4) . . ? 
C2A B7A B8A 104.3(4) . . ? 
B12A B7A B8A 60.8(3) . . ? 
B3A B7A B8A 58.6(3) . . ? 
B11A B7A B8A 108.1(4) . . ? 
C2A B7A H7A 124.9 . . ? 
B12A B7A H7A 122.5 . . ? 
B3A B7A H7A 121.7 . . ? 
B11A B7A H7A 121.5 . . ? 
B8A B7A H7A 122.5 . . ? 
B3A B8A B4A 60.7(3) . . ? 
B3A B8A B7A 60.5(3) . . ? 
B4A B8A B7A 107.9(4) . . ? 
B3A B8A B9A 108.0(4) . . ? 
B4A B8A B9A 59.5(3) . . ? 
B7A B8A B9A 106.3(4) . . ? 
B3A B8A B12A 107.9(4) . . ? 
B4A B8A B12A 106.4(4) . . ? 
B7A B8A B12A 59.4(3) . . ? 
B9A B8A B12A 58.6(3) . . ? 
B3A B8A H8A 120.9 . . ? 
B4A B8A H8A 122.0 . . ? 
B7A B8A H8A 122.1 . . ? 
B9A B8A H8A 122.8 . . ? 
B12A B8A H8A 122.8 . . ? 
B4A B9A B12A 107.9(4) . . ? 
B4A B9A B5A 60.5(3) . . ? 
B12A B9A B5A 108.4(4) . . ? 
B4A B9A B10A 108.2(4) . . ? 
B12A B9A B10A 60.9(3) . . ? 
B5A B9A B10A 59.5(3) . . ? 
B4A B9A B8A 59.0(3) . . ? 
B12A B9A B8A 60.9(3) . . ? 
B5A B9A B8A 108.1(3) . . ? 
B10A B9A B8A 109.4(4) . . ? 
B4A B9A H9A 122.1 . . ? 
B12A B9A H9A 121.1 . . ? 
B5A B9A H9A 121.7 . . ? 
B10A B9A H9A 121.1 . . ? 
B8A B9A H9A 121.4 . . ? 
B5A B10A B11A 107.9(3) . . ? 
B5A B10A B6A 60.2(3) . . ? 
B11A B10A B6A 60.4(3) . . ? 
B5A B10A B9A 59.7(3) . . ? 
B11A B10A B9A 106.7(4) . . ? 
B6A B10A B9A 107.7(4) . . ? 
B5A B10A B12A 106.9(4) . . ? 
B11A B10A B12A 59.5(3) . . ? 
B6A B10A B12A 107.9(4) . . ? 
B9A B10A B12A 59.0(3) . . ? 
B5A B10A H10A 121.9 . . ? 
B11A B10A H10A 122.0 . . ? 
B6A B10A H10A 121.3 . . ? 
B9A B10A H10A 122.6 . . ? 
B12A B10A H10A 122.5 . . ? 
C2A B11A B10A 105.3(3) . . ? 
C2A B11A B12A 104.5(4) . . ? 
B10A B11A B12A 61.1(3) . . ? 
C2A B11A B7A 58.3(3) . . ? 
B10A B11A B7A 109.4(4) . . ? 
B12A B11A B7A 60.1(3) . . ? 
C2A B11A B6A 59.2(3) . . ? 
B10A B11A B6A 60.0(3) . . ? 
B12A B11A B6A 108.8(4) . . ? 
B7A B11A B6A 108.6(4) . . ? 
C2A B11A H11A 125.0 . . ? 
B10A B11A H11A 121.5 . . ? 
B12A B11A H11A 122.0 . . ? 
B7A B11A H11A 121.1 . . ? 
B6A B11A H11A 121.1 . . ? 
B9A B12A B11A 107.5(4) . . ? 
B9A B12A B7A 108.3(4) . . ? 
B11A B12A B7A 60.3(3) . . ? 
B9A B12A B10A 60.1(3) . . ? 
B11A B12A B10A 59.3(3) . . ? 
B7A B12A B10A 108.1(4) . . ? 
B9A B12A B8A 60.6(3) . . ? 
B11A B12A B8A 107.9(4) . . ? 
B7A B12A B8A 59.8(3) . . ? 
B10A B12A B8A 108.5(4) . . ? 
B9A B12A H12A 121.6 . . ? 
B11A B12A H12A 122.1 . . ? 
B7A B12A H12A 121.6 . . ? 
B10A B12A H12A 121.7 . . ? 
B8A B12A H12A 121.4 . . ? 
N2A C3A N1A 118.2(3) . . ? 
N2A C3A N4A 124.9(3) . . ? 
N1A C3A N4A 116.9(4) . . ? 
N2A C4A N5A 117.5(3) . . ? 
N2A C4A N3A 126.8(3) . . ? 
N5A C4A N3A 115.6(3) . . ? 
N4A C5A N3A 130.6(4) . . ? 
N4A C5A N7A 113.0(3) . . ? 
N3A C5A N7A 116.4(3) . . ? 
O1A C6A N6A 120.8(4) . . ? 
O1A C6A C7A 123.8(4) . . ? 
N6A C6A C7A 115.4(3) . . ? 
C12A C7A C8A 118.4(4) . . ? 
C12A C7A C6A 123.4(4) . . ? 
C8A C7A C6A 118.3(4) . . ? 
C9A C8A C7A 120.7(4) . . ? 
C9A C8A H8AA 119.7 . . ? 
C7A C8A H8AA 119.7 . . ? 
C10A C9A C8A 120.3(4) . . ? 
C10A C9A H9AA 119.8 . . ? 
C8A C9A H9AA 119.8 . . ? 
C9A C10A C11A 120.0(4) . . ? 
C9A C10A H10C 120.0 . . ? 
C11A C10A H10C 120.0 . . ? 
C12A C11A C10A 119.4(4) . . ? 
C12A C11A H11C 120.3 . . ? 
C10A C11A H11C 120.3 . . ? 
C7A C12A C11A 121.2(4) . . ? 
C7A C12A H12C 119.4 . . ? 
C11A C12A H12C 119.4 . . ? 
N8A C13A N10A 112.2(3) . . ? 
N8A C13A C14A 123.6(4) . . ? 
N10A C13A C14A 124.2(3) . . ? 
C15A C14A C19A 120.0(4) . . ? 
C15A C14A C13A 120.4(4) . . ? 
C19A C14A C13A 119.6(4) . . ? 
C14A C15A C16A 120.0(4) . . ? 
C14A C15A H15A 120.0 . . ? 
C16A C15A H15A 120.0 . . ? 
C17A C16A C15A 120.4(4) . . ? 
C17A C16A H16A 119.8 . . ? 
C15A C16A H16A 119.8 . . ? 
C18A C17A C16A 119.7(4) . . ? 
C18A C17A H17A 120.2 . . ? 
C16A C17A H17A 120.2 . . ? 
C17A C18A C19A 120.6(5) . . ? 
C17A C18A H18A 119.7 . . ? 
C19A C18A H18A 119.7 . . ? 
C18A C19A C14A 119.3(4) . . ? 
C18A C19A H19A 120.3 . . ? 
C14A C19A H19A 120.3 . . ? 
C3B N1B B3B 129.5(3) . . ? 
C3B N1B H1BA 115.3 . . ? 
B3B N1B H1BA 115.3 . . ? 
C4B N2B C3B 113.1(3) . . ? 
C5B N3B C4B 110.7(3) . . ? 
C5B N4B C3B 111.5(3) . . ? 
C4B N5B N6B 119.9(3) . . ? 
C4B N5B H5BA 120.1 . . ? 
N6B N5B H5BA 120.1 . . ? 
C6B N6B N5B 120.0(3) . . ? 
C6B N6B H6BA 120.0 . . ? 
N5B N6B H6BA 120.0 . . ? 
N8B N7B N9B 113.6(3) . . ? 
N8B N7B C5B 123.1(3) . . ? 
N9B N7B C5B 123.3(3) . . ? 
C13B N8B N7B 102.0(3) . . ? 
N10B N9B N7B 105.7(3) . . ? 
N9B N10B C13B 106.6(3) . . ? 
C2B C1B B4B 111.4(3) . . ? 
C2B C1B B5B 111.2(3) . . ? 
B4B C1B B5B 63.3(3) . . ? 
C2B C1B B6B 61.2(3) . . ? 
B4B C1B B6B 115.4(3) . . ? 
B5B C1B B6B 62.9(3) . . ? 
C2B C1B B3B 61.8(3) . . ? 
B4B C1B B3B 63.3(3) . . ? 
B5B C1B B3B 116.2(3) . . ? 
B6B C1B B3B 115.7(3) . . ? 
C2B C1B H1B 121.3 . . ? 
B4B C1B H1B 117.4 . . ? 
B5B C1B H1B 118.6 . . ? 
B6B C1B H1B 118.2 . . ? 
B3B C1B H1B 115.3 . . ? 
C1B C2B B11B 111.6(3) . . ? 
C1B C2B B7B 112.2(3) . . ? 
B11B C2B B7B 63.5(3) . . ? 
C1B C2B B6B 61.5(3) . . ? 
B11B C2B B6B 63.2(3) . . ? 
B7B C2B B6B 116.5(3) . . ? 
C1B C2B B3B 61.5(2) . . ? 
B11B C2B B3B 116.0(3) . . ? 
B7B C2B B3B 63.5(3) . . ? 
B6B C2B B3B 115.6(3) . . ? 
C1B C2B H2B 121.5 . . ? 
B11B C2B H2B 116.4 . . ? 
B7B C2B H2B 117.8 . . ? 
B6B C2B H2B 115.3 . . ? 
B3B C2B H2B 118.4 . . ? 
N1B B3B C1B 123.2(4) . . ? 
N1B B3B C2B 121.7(3) . . ? 
C1B B3B C2B 56.7(2) . . ? 
N1B B3B B8B 127.3(4) . . ? 
C1B B3B B8B 103.4(3) . . ? 
C2B B3B B8B 103.0(3) . . ? 
N1B B3B B4B 125.5(4) . . ? 
C1B B3B B4B 57.6(2) . . ? 
C2B B3B B4B 102.9(3) . . ? 
B8B B3B B4B 59.9(3) . . ? 
N1B B3B B7B 121.8(4) . . ? 
C1B B3B B7B 103.5(3) . . ? 
C2B B3B B7B 57.4(2) . . ? 
B8B B3B B7B 60.1(3) . . ? 
B4B B3B B7B 107.5(3) . . ? 
C1B B4B B9B 104.9(3) . . ? 
C1B B4B B8B 104.3(3) . . ? 
B9B B4B B8B 60.7(3) . . ? 
C1B B4B B5B 58.8(3) . . ? 
B9B B4B B5B 60.4(3) . . ? 
B8B B4B B5B 108.7(4) . . ? 
C1B B4B B3B 59.1(2) . . ? 
B9B B4B B3B 108.9(3) . . ? 
B8B B4B B3B 59.5(3) . . ? 
B5B B4B B3B 109.0(3) . . ? 
C1B B4B H4B 125.0 . . ? 
B9B B4B H4B 121.8 . . ? 
B8B B4B H4B 122.4 . . ? 
B5B B4B H4B 120.9 . . ? 
B3B B4B H4B 121.0 . . ? 
C1B B5B B9B 103.4(3) . . ? 
C1B B5B B6B 58.7(3) . . ? 
B9B B5B B6B 108.1(4) . . ? 
C1B B5B B4B 58.0(2) . . ? 
B9B B5B B4B 59.2(3) . . ? 
B6B B5B B4B 107.6(3) . . ? 
C1B B5B B10B 104.1(4) . . ? 
B9B B5B B10B 61.1(3) . . ? 
B6B B5B B10B 59.6(3) . . ? 
B4B B5B B10B 108.0(4) . . ? 
C1B B5B H5B 125.6 . . ? 
B9B B5B H5B 122.5 . . ? 
B6B B5B H5B 121.5 . . ? 
B4B B5B H5B 122.0 . . ? 
B10B B5B H5B 122.1 . . ? 
C2B B6B C1B 57.2(2) . . ? 
C2B B6B B10B 104.1(4) . . ? 
C1B B6B B10B 104.4(3) . . ? 
C2B B6B B11B 58.1(3) . . ? 
C1B B6B B11B 104.1(3) . . ? 
B10B B6B B11B 59.8(3) . . ? 
C2B B6B B5B 104.6(3) . . ? 
C1B B6B B5B 58.5(3) . . ? 
B10B B6B B5B 60.2(3) . . ? 
B11B B6B B5B 107.8(4) . . ? 
C2B B6B H6B 124.9 . . ? 
C1B B6B H6B 124.7 . . ? 
B10B B6B H6B 123.2 . . ? 
B11B B6B H6B 122.5 . . ? 
B5B B6B H6B 122.0 . . ? 
C2B B7B B12B 103.4(4) . . ? 
C2B B7B B11B 58.2(3) . . ? 
B12B B7B B11B 59.3(3) . . ? 
C2B B7B B8B 103.5(3) . . ? 
B12B B7B B8B 60.1(3) . . ? 
B11B B7B B8B 107.2(4) . . ? 
C2B B7B B3B 59.1(3) . . ? 
B12B B7B B3B 107.5(4) . . ? 
B11B B7B B3B 108.1(4) . . ? 
B8B B7B B3B 59.1(3) . . ? 
C2B B7B H7B 125.4 . . ? 
B12B B7B H7B 122.9 . . ? 
B11B B7B H7B 121.8 . . ? 
B8B B7B H7B 123.1 . . ? 
B3B B7B H7B 121.4 . . ? 
B3B B8B B4B 60.6(3) . . ? 
B3B B8B B9B 108.4(3) . . ? 
B4B B8B B9B 59.1(3) . . ? 
B3B B8B B12B 108.5(3) . . ? 
B4B B8B B12B 107.5(4) . . ? 
B9B B8B B12B 60.4(3) . . ? 
B3B B8B B7B 60.7(3) . . ? 
B4B B8B B7B 108.5(3) . . ? 
B9B B8B B7B 108.4(3) . . ? 
B12B B8B B7B 59.7(3) . . ? 
B3B B8B H8B 121.0 . . ? 
B4B B8B H8B 122.0 . . ? 
B9B B8B H8B 121.7 . . ? 
B12B B8B H8B 121.8 . . ? 
B7B B8B H8B 121.3 . . ? 
B4B B9B B5B 60.5(3) . . ? 
B4B B9B B8B 60.2(3) . . ? 
B5B B9B B8B 108.4(3) . . ? 
B4B B9B B12B 107.8(3) . . ? 
B5B B9B B12B 107.5(3) . . ? 
B8B B9B B12B 59.8(3) . . ? 
B4B B9B B10B 107.9(3) . . ? 
B5B B9B B10B 59.5(3) . . ? 
B8B B9B B10B 107.7(4) . . ? 
B12B B9B B10B 59.7(3) . . ? 
B4B B9B H9B 121.5 . . ? 
B5B B9B H9B 121.7 . . ? 
B8B B9B H9B 121.6 . . ? 
B12B B9B H9B 122.1 . . ? 
B10B B9B H9B 122.1 . . ? 
B11B B10B B6B 60.3(3) . . ? 
B11B B10B B5B 108.2(4) . . ? 
B6B B10B B5B 60.2(3) . . ? 
B11B B10B B12B 59.3(3) . . ? 
B6B B10B B12B 107.4(4) . . ? 
B5B B10B B12B 107.5(4) . . ? 
B11B B10B B9B 107.2(4) . . ? 
B6B B10B B9B 107.3(4) . . ? 
B5B B10B B9B 59.4(3) . . ? 
B12B B10B B9B 59.8(3) . . ? 
B11B B10B H10B 121.8 . . ? 
B6B B10B H10B 121.8 . . ? 
B5B B10B H10B 121.7 . . ? 
B12B B10B H10B 122.2 . . ? 
B9B B10B H10B 122.4 . . ? 
C2B B11B B12B 104.2(3) . . ? 
C2B B11B B10B 104.8(4) . . ? 
B12B B11B B10B 61.2(3) . . ? 
C2B B11B B6B 58.8(3) . . ? 
B12B B11B B6B 108.6(4) . . ? 
B10B B11B B6B 59.9(3) . . ? 
C2B B11B B7B 58.3(3) . . ? 
B12B B11B B7B 60.3(3) . . ? 
B10B B11B B7B 109.6(4) . . ? 
B6B B11B B7B 108.5(4) . . ? 
C2B B11B H11B 125.4 . . ? 
B12B B11B H11B 122.0 . . ? 
B10B B11B H11B 121.5 . . ? 
B6B B11B H11B 121.3 . . ? 
B7B B11B H11B 120.9 . . ? 
B11B B12B B7B 60.4(3) . . ? 
B11B B12B B8B 108.2(3) . . ? 
B7B B12B B8B 60.2(3) . . ? 
B11B B12B B10B 59.6(3) . . ? 
B7B B12B B10B 108.4(4) . . ? 
B8B B12B B10B 108.3(4) . . ? 
B11B B12B B9B 107.9(4) . . ? 
B7B B12B B9B 108.3(4) . . ? 
B8B B12B B9B 59.8(3) . . ? 
B10B B12B B9B 60.4(3) . . ? 
B11B B12B H12B 121.8 . . ? 
B7B B12B H12B 121.3 . . ? 
B8B B12B H12B 121.6 . . ? 
B10B B12B H12B 121.6 . . ? 
B9B B12B H12B 121.7 . . ? 
N2B C3B N4B 125.9(4) . . ? 
N2B C3B N1B 117.3(3) . . ? 
N4B C3B N1B 116.8(3) . . ? 
N2B C4B N3B 127.2(4) . . ? 
N2B C4B N5B 118.2(4) . . ? 
N3B C4B N5B 114.6(3) . . ? 
N3B C5B N4B 131.4(4) . . ? 
N3B C5B N7B 114.9(3) . . ? 
N4B C5B N7B 113.7(3) . . ? 
O1B C6B N6B 121.5(4) . . ? 
O1B C6B C7B 122.5(4) . . ? 
N6B C6B C7B 115.9(4) . . ? 
C8B C7B C12B 120.9(5) . . ? 
C8B C7B C6B 117.3(4) . . ? 
C12B C7B C6B 121.8(5) . . ? 
C9B C8B C7B 120.3(6) . . ? 
C9B C8B H8BA 119.9 . . ? 
C7B C8B H8BA 119.9 . . ? 
C8B C9B C10B 118.6(6) . . ? 
C8B C9B H9BA 120.7 . . ? 
C10B C9B H9BA 120.7 . . ? 
C11B C10B C9B 121.8(6) . . ? 
C11B C10B H10D 119.1 . . ? 
C9B C10B H10D 119.1 . . ? 
C10B C11B C12B 120.2(6) . . ? 
C10B C11B H11D 119.9 . . ? 
C12B C11B H11D 119.9 . . ? 
C11B C12B C7B 118.2(6) . . ? 
C11B C12B H12D 120.9 . . ? 
C7B C12B H12D 120.9 . . ? 
N8B C13B N10B 112.0(4) . . ? 
N8B C13B C14B 124.1(4) . . ? 
N10B C13B C14B 123.9(4) . . ? 
C19B C14B C15B 120.2(4) . . ? 
C19B C14B C13B 120.1(4) . . ? 
C15B C14B C13B 119.6(4) . . ? 
C16B C15B C14B 118.9(4) . . ? 
C16B C15B H15B 120.6 . . ? 
C14B C15B H15B 120.6 . . ? 
C17B C16B C15B 120.9(4) . . ? 
C17B C16B H16B 119.6 . . ? 
C15B C16B H16B 119.6 . . ? 
C16B C17B C18B 119.9(4) . . ? 
C16B C17B H17B 120.0 . . ? 
C18B C17B H17B 120.0 . . ? 
C19B C18B C17B 120.4(4) . . ? 
C19B C18B H18B 119.8 . . ? 
C17B C18B H18B 119.8 . . ? 
C18B C19B C14B 119.7(4) . . ? 
C18B C19B H19B 120.1 . . ? 
C14B C19B H19B 120.1 . . ? 
  
loop_ 
 _geom_torsion_atom_site_label_1 
 _geom_torsion_atom_site_label_2 
 _geom_torsion_atom_site_label_3 
 _geom_torsion_atom_site_label_4 
 _geom_torsion 
 _geom_torsion_site_symmetry_1 
 _geom_torsion_site_symmetry_2 
 _geom_torsion_site_symmetry_3 
 _geom_torsion_site_symmetry_4 
 _geom_torsion_publ_flag 
C4A N5A N6A C6A 87.7(4) . . . . ? 
N9A N7A N8A C13A -0.2(4) . . . . ? 
C5A N7A N8A C13A -177.9(3) . . . . ? 
N8A N7A N9A N10A 0.3(4) . . . . ? 
C5A N7A N9A N10A 177.9(3) . . . . ? 
N7A N9A N10A C13A -0.2(4) . . . . ? 
B4A C1A C2A B7A -0.2(4) . . . . ? 
B5A C1A C2A B7A -68.8(4) . . . . ? 
B6A C1A C2A B7A -108.7(4) . . . . ? 
B3A C1A C2A B7A 39.5(3) . . . . ? 
B4A C1A C2A B11A 68.1(4) . . . . ? 
B5A C1A C2A B11A -0.5(5) . . . . ? 
B6A C1A C2A B11A -40.4(4) . . . . ? 
B3A C1A C2A B11A 107.8(4) . . . . ? 
B4A C1A C2A B6A 108.5(4) . . . . ? 
B5A C1A C2A B6A 39.9(3) . . . . ? 
B3A C1A C2A B6A 148.2(3) . . . . ? 
B4A C1A C2A B3A -39.7(3) . . . . ? 
B5A C1A C2A B3A -108.3(4) . . . . ? 
B6A C1A C2A B3A -148.2(3) . . . . ? 
C3A N1A B3A C1A -40.6(6) . . . . ? 
C3A N1A B3A C2A 28.8(6) . . . . ? 
C3A N1A B3A B8A 175.5(4) . . . . ? 
C3A N1A B3A B4A -110.7(5) . . . . ? 
C3A N1A B3A B7A 99.8(5) . . . . ? 
C2A C1A B3A N1A 111.4(4) . . . . ? 
B4A C1A B3A N1A -110.7(5) . . . . ? 
B5A C1A B3A N1A -147.1(4) . . . . ? 
B6A C1A B3A N1A 142.4(4) . . . . ? 
B4A C1A B3A C2A 137.9(3) . . . . ? 
B5A C1A B3A C2A 101.5(4) . . . . ? 
B6A C1A B3A C2A 31.0(3) . . . . ? 
C2A C1A B3A B8A -98.5(4) . . . . ? 
B4A C1A B3A B8A 39.4(3) . . . . ? 
B5A C1A B3A B8A 3.0(5) . . . . ? 
B6A C1A B3A B8A -67.5(4) . . . . ? 
C2A C1A B3A B4A -137.9(3) . . . . ? 
B5A C1A B3A B4A -36.4(4) . . . . ? 
B6A C1A B3A B4A -106.9(4) . . . . ? 
C2A C1A B3A B7A -35.6(3) . . . . ? 
B4A C1A B3A B7A 102.3(4) . . . . ? 
B5A C1A B3A B7A 65.9(4) . . . . ? 
B6A C1A B3A B7A -4.6(4) . . . . ? 
C1A C2A B3A N1A -110.2(4) . . . . ? 
B7A C2A B3A N1A 111.7(5) . . . . ? 
B11A C2A B3A N1A 149.0(4) . . . . ? 
B6A C2A B3A N1A -140.8(4) . . . . ? 
B7A C2A B3A C1A -138.1(3) . . . . ? 
B11A C2A B3A C1A -100.8(4) . . . . ? 
B6A C2A B3A C1A -30.6(3) . . . . ? 
C1A C2A B3A B8A 97.7(3) . . . . ? 
B7A C2A B3A B8A -40.5(3) . . . . ? 
B11A C2A B3A B8A -3.2(5) . . . . ? 
B6A C2A B3A B8A 67.0(4) . . . . ? 
C1A C2A B3A B4A 35.7(3) . . . . ? 
B7A C2A B3A B4A -102.4(4) . . . . ? 
B11A C2A B3A B4A -65.1(4) . . . . ? 
B6A C2A B3A B4A 5.1(4) . . . . ? 
C1A C2A B3A B7A 138.1(3) . . . . ? 
B11A C2A B3A B7A 37.3(4) . . . . ? 
B6A C2A B3A B7A 107.5(4) . . . . ? 
C2A C1A B4A B8A -0.1(4) . . . . ? 
B5A C1A B4A B8A 103.8(4) . . . . ? 
B6A C1A B4A B8A 67.6(4) . . . . ? 
B3A C1A B4A B8A -39.4(3) . . . . ? 
C2A C1A B4A B9A -64.1(4) . . . . ? 
B5A C1A B4A B9A 39.8(3) . . . . ? 
B6A C1A B4A B9A 3.7(5) . . . . ? 
B3A C1A B4A B9A -103.4(4) . . . . ? 
C2A C1A B4A B3A 39.3(3) . . . . ? 
B5A C1A B4A B3A 143.2(4) . . . . ? 
B6A C1A B4A B3A 107.0(4) . . . . ? 
C2A C1A B4A B5A -103.9(4) . . . . ? 
B6A C1A B4A B5A -36.1(4) . . . . ? 
B3A C1A B4A B5A -143.2(4) . . . . ? 
N1A B3A B4A C1A 110.9(4) . . . . ? 
C2A B3A B4A C1A -35.3(3) . . . . ? 
B8A B3A B4A C1A -134.7(4) . . . . ? 
B7A B3A B4A C1A -95.4(4) . . . . ? 
N1A B3A B4A B8A -114.4(5) . . . . ? 
C1A B3A B4A B8A 134.7(4) . . . . ? 
C2A B3A B4A B8A 99.4(4) . . . . ? 
B7A B3A B4A B8A 39.3(4) . . . . ? 
N1A B3A B4A B9A -152.8(4) . . . . ? 
C1A B3A B4A B9A 96.3(4) . . . . ? 
C2A B3A B4A B9A 61.0(4) . . . . ? 
B8A B3A B4A B9A -38.4(4) . . . . ? 
B7A B3A B4A B9A 0.9(5) . . . . ? 
N1A B3A B4A B5A 143.6(4) . . . . ? 
C1A B3A B4A B5A 32.8(3) . . . . ? 
C2A B3A B4A B5A -2.6(4) . . . . ? 
B8A B3A B4A B5A -102.0(4) . . . . ? 
B7A B3A B4A B5A -62.7(5) . . . . ? 
C2A C1A B5A B10A 1.1(4) . . . . ? 
B4A C1A B5A B10A -102.7(4) . . . . ? 
B6A C1A B5A B10A 40.5(3) . . . . ? 
B3A C1A B5A B10A -66.7(4) . . . . ? 
C2A C1A B5A B9A 64.2(4) . . . . ? 
B4A C1A B5A B9A -39.7(4) . . . . ? 
B6A C1A B5A B9A 103.6(4) . . . . ? 
B3A C1A B5A B9A -3.6(5) . . . . ? 
C2A C1A B5A B6A -39.4(3) . . . . ? 
B4A C1A B5A B6A -143.3(4) . . . . ? 
B3A C1A B5A B6A -107.2(4) . . . . ? 
C2A C1A B5A B4A 103.9(4) . . . . ? 
B6A C1A B5A B4A 143.3(4) . . . . ? 
B3A C1A B5A B4A 36.1(4) . . . . ? 
B8A B4A B5A C1A -96.6(4) . . . . ? 
B9A B4A B5A C1A -134.2(4) . . . . ? 
B3A B4A B5A C1A -33.2(3) . . . . ? 
C1A B4A B5A B10A 96.6(4) . . . . ? 
B8A B4A B5A B10A 0.0(5) . . . . ? 
B9A B4A B5A B10A -37.6(4) . . . . ? 
B3A B4A B5A B10A 63.4(4) . . . . ? 
C1A B4A B5A B9A 134.2(4) . . . . ? 
B8A B4A B5A B9A 37.6(4) . . . . ? 
B3A B4A B5A B9A 101.0(4) . . . . ? 
C1A B4A B5A B6A 32.7(3) . . . . ? 
B8A B4A B5A B6A -63.9(4) . . . . ? 
B9A B4A B5A B6A -101.5(4) . . . . ? 
B3A B4A B5A B6A -0.5(5) . . . . ? 
B4A C1A B6A C2A -101.4(4) . . . . ? 
B5A C1A B6A C2A -137.7(4) . . . . ? 
B3A C1A B6A C2A -31.0(3) . . . . ? 
C2A C1A B6A B5A 137.7(4) . . . . ? 
B4A C1A B6A B5A 36.4(4) . . . . ? 
B3A C1A B6A B5A 106.7(4) . . . . ? 
C2A C1A B6A B10A 97.9(4) . . . . ? 
B4A C1A B6A B10A -3.5(5) . . . . ? 
B5A C1A B6A B10A -39.9(3) . . . . ? 
B3A C1A B6A B10A 66.8(4) . . . . ? 
C2A C1A B6A B11A 36.4(3) . . . . ? 
B4A C1A B6A B11A -64.9(4) . . . . ? 
B5A C1A B6A B11A -101.3(4) . . . . ? 
B3A C1A B6A B11A 5.4(4) . . . . ? 
B7A C2A B6A C1A 101.0(4) . . . . ? 
B11A C2A B6A C1A 137.1(4) . . . . ? 
B3A C2A B6A C1A 30.7(3) . . . . ? 
C1A C2A B6A B5A -36.1(3) . . . . ? 
B7A C2A B6A B5A 64.9(5) . . . . ? 
B11A C2A B6A B5A 101.0(4) . . . . ? 
B3A C2A B6A B5A -5.4(5) . . . . ? 
C1A C2A B6A B10A -97.6(4) . . . . ? 
B7A C2A B6A B10A 3.4(5) . . . . ? 
B11A C2A B6A B10A 39.5(4) . . . . ? 
B3A C2A B6A B10A -66.9(4) . . . . ? 
C1A C2A B6A B11A -137.1(4) . . . . ? 
B7A C2A B6A B11A -36.1(4) . . . . ? 
B3A C2A B6A B11A -106.4(4) . . . . ? 
B10A B5A B6A C1A -133.7(4) . . . . ? 
B9A B5A B6A C1A -95.6(4) . . . . ? 
B4A B5A B6A C1A -32.3(3) . . . . ? 
C1A B5A B6A C2A 35.7(3) . . . . ? 
B10A B5A B6A C2A -98.1(4) . . . . ? 
B9A B5A B6A C2A -59.9(4) . . . . ? 
B4A B5A B6A C2A 3.4(4) . . . . ? 
C1A B5A B6A B10A 133.7(4) . . . . ? 
B9A B5A B6A B10A 38.2(3) . . . . ? 
B4A B5A B6A B10A 101.5(4) . . . . ? 
C1A B5A B6A B11A 95.9(4) . . . . ? 
B10A B5A B6A B11A -37.8(3) . . . . ? 
B9A B5A B6A B11A 0.3(4) . . . . ? 
B4A B5A B6A B11A 63.6(4) . . . . ? 
C1A C2A B7A B12A 63.3(4) . . . . ? 
B11A C2A B7A B12A -39.8(4) . . . . ? 
B6A C2A B7A B12A -3.8(5) . . . . ? 
B3A C2A B7A B12A 102.2(4) . . . . ? 
C1A C2A B7A B3A -38.9(3) . . . . ? 
B11A C2A B7A B3A -142.0(4) . . . . ? 
B6A C2A B7A B3A -106.1(4) . . . . ? 
C1A C2A B7A B11A 103.1(4) . . . . ? 
B6A C2A B7A B11A 35.9(4) . . . . ? 
B3A C2A B7A B11A 142.0(4) . . . . ? 
C1A C2A B7A B8A 0.4(4) . . . . ? 
B11A C2A B7A B8A -102.7(4) . . . . ? 
B6A C2A B7A B8A -66.8(4) . . . . ? 
B3A C2A B7A B8A 39.3(3) . . . . ? 
N1A B3A B7A C2A -111.4(5) . . . . ? 
C1A B3A B7A C2A 35.2(3) . . . . ? 
B8A B3A B7A C2A 134.1(4) . . . . ? 
B4A B3A B7A C2A 95.2(4) . . . . ? 
N1A B3A B7A B12A 152.2(4) . . . . ? 
C1A B3A B7A B12A -61.3(5) . . . . ? 
C2A B3A B7A B12A -96.4(4) . . . . ? 
B8A B3A B7A B12A 37.6(4) . . . . ? 
B4A B3A B7A B12A -1.2(5) . . . . ? 
N1A B3A B7A B11A -144.9(4) . . . . ? 
C1A B3A B7A B11A 1.7(5) . . . . ? 
C2A B3A B7A B11A -33.5(3) . . . . ? 
B8A B3A B7A B11A 100.6(4) . . . . ? 
B4A B3A B7A B11A 61.8(5) . . . . ? 
N1A B3A B7A B8A 114.5(5) . . . . ? 
C1A B3A B7A B8A -98.9(4) . . . . ? 
C2A B3A B7A B8A -134.1(4) . . . . ? 
B4A B3A B7A B8A -38.8(3) . . . . ? 
N1A B3A B8A B4A 111.0(5) . . . . ? 
C1A B3A B8A B4A -38.3(3) . . . . ? 
C2A B3A B8A B4A -97.3(4) . . . . ? 
B7A B3A B8A B4A -136.3(4) . . . . ? 
N1A B3A B8A B7A -112.7(5) . . . . ? 
C1A B3A B8A B7A 98.0(4) . . . . ? 
C2A B3A B8A B7A 39.0(3) . . . . ? 
B4A B3A B8A B7A 136.3(4) . . . . ? 
N1A B3A B8A B9A 148.3(4) . . . . ? 
C1A B3A B8A B9A -1.0(5) . . . . ? 
C2A B3A B8A B9A -60.0(5) . . . . ? 
B4A B3A B8A B9A 37.3(4) . . . . ? 
B7A B3A B8A B9A -99.0(5) . . . . ? 
N1A B3A B8A B12A -149.8(4) . . . . ? 
C1A B3A B8A B12A 60.9(4) . . . . ? 
C2A B3A B8A B12A 1.9(5) . . . . ? 
B4A B3A B8A B12A 99.2(4) . . . . ? 
B7A B3A B8A B12A -37.1(4) . . . . ? 
C1A B4A B8A B3A 39.5(3) . . . . ? 
B9A B4A B8A B3A 138.0(4) . . . . ? 
B5A B4A B8A B3A 101.1(4) . . . . ? 
C1A B4A B8A B7A 0.3(5) . . . . ? 
B9A B4A B8A B7A 98.8(4) . . . . ? 
B3A B4A B8A B7A -39.2(3) . . . . ? 
B5A B4A B8A B7A 61.9(4) . . . . ? 
C1A B4A B8A B9A -98.4(4) . . . . ? 
B3A B4A B8A B9A -138.0(4) . . . . ? 
B5A B4A B8A B9A -36.9(4) . . . . ? 
C1A B4A B8A B12A -62.1(4) . . . . ? 
B9A B4A B8A B12A 36.4(4) . . . . ? 
B3A B4A B8A B12A -101.6(4) . . . . ? 
B5A B4A B8A B12A -0.5(5) . . . . ? 
C2A B7A B8A B3A -39.7(3) . . . . ? 
B12A B7A B8A B3A -138.1(4) . . . . ? 
B11A B7A B8A B3A -100.6(4) . . . . ? 
C2A B7A B8A B4A -0.4(5) . . . . ? 
B12A B7A B8A B4A -98.9(4) . . . . ? 
B3A B7A B8A B4A 39.3(3) . . . . ? 
B11A B7A B8A B4A -61.4(4) . . . . ? 
C2A B7A B8A B9A 62.1(4) . . . . ? 
B12A B7A B8A B9A -36.4(4) . . . . ? 
B3A B7A B8A B9A 101.8(4) . . . . ? 
B11A B7A B8A B9A 1.1(5) . . . . ? 
C2A B7A B8A B12A 98.4(4) . . . . ? 
B3A B7A B8A B12A 138.1(4) . . . . ? 
B11A B7A B8A B12A 37.5(4) . . . . ? 
C1A B4A B9A B12A 62.2(4) . . . . ? 
B8A B4A B9A B12A -37.7(4) . . . . ? 
B3A B4A B9A B12A -0.2(5) . . . . ? 
B5A B4A B9A B12A 101.4(4) . . . . ? 
C1A B4A B9A B5A -39.2(3) . . . . ? 
B8A B4A B9A B5A -139.2(4) . . . . ? 
B3A B4A B9A B5A -101.7(4) . . . . ? 
C1A B4A B9A B10A -2.2(5) . . . . ? 
B8A B4A B9A B10A -102.2(4) . . . . ? 
B3A B4A B9A B10A -64.7(4) . . . . ? 
B5A B4A B9A B10A 37.0(3) . . . . ? 
C1A B4A B9A B8A 99.9(4) . . . . ? 
B3A B4A B9A B8A 37.5(4) . . . . ? 
B5A B4A B9A B8A 139.2(4) . . . . ? 
C1A B5A B9A B4A 38.8(3) . . . . ? 
B10A B5A B9A B4A 138.5(4) . . . . ? 
B6A B5A B9A B4A 100.5(4) . . . . ? 
C1A B5A B9A B12A -61.8(4) . . . . ? 
B10A B5A B9A B12A 37.8(4) . . . . ? 
B6A B5A B9A B12A -0.1(5) . . . . ? 
B4A B5A B9A B12A -100.6(4) . . . . ? 
C1A B5A B9A B10A -99.6(4) . . . . ? 
B6A B5A B9A B10A -37.9(3) . . . . ? 
B4A B5A B9A B10A -138.5(4) . . . . ? 
C1A B5A B9A B8A 2.7(5) . . . . ? 
B10A B5A B9A B8A 102.3(4) . . . . ? 
B6A B5A B9A B8A 64.4(5) . . . . ? 
B4A B5A B9A B8A -36.2(4) . . . . ? 
B3A B8A B9A B4A -37.8(4) . . . . ? 
B7A B8A B9A B4A -101.5(4) . . . . ? 
B12A B8A B9A B4A -138.2(4) . . . . ? 
B3A B8A B9A B12A 100.4(4) . . . . ? 
B4A B8A B9A B12A 138.2(4) . . . . ? 
B7A B8A B9A B12A 36.7(4) . . . . ? 
B3A B8A B9A B5A -1.1(6) . . . . ? 
B4A B8A B9A B5A 36.8(4) . . . . ? 
B7A B8A B9A B5A -64.7(5) . . . . ? 
B12A B8A B9A B5A -101.4(5) . . . . ? 
B3A B8A B9A B10A 62.2(5) . . . . ? 
B4A B8A B9A B10A 100.0(4) . . . . ? 
B7A B8A B9A B10A -1.4(5) . . . . ? 
B12A B8A B9A B10A -38.2(4) . . . . ? 
C1A B5A B10A B11A -1.4(5) . . . . ? 
B9A B5A B10A B11A -99.3(4) . . . . ? 
B6A B5A B10A B11A 38.6(4) . . . . ? 
B4A B5A B10A B11A -62.1(5) . . . . ? 
C1A B5A B10A B6A -39.9(3) . . . . ? 
B9A B5A B10A B6A -137.9(4) . . . . ? 
B4A B5A B10A B6A -100.7(4) . . . . ? 
C1A B5A B10A B9A 98.0(4) . . . . ? 
B6A B5A B10A B9A 137.9(4) . . . . ? 
B4A B5A B10A B9A 37.2(3) . . . . ? 
C1A B5A B10A B12A 61.3(4) . . . . ? 
B9A B5A B10A B12A -36.6(4) . . . . ? 
B6A B5A B10A B12A 101.3(4) . . . . ? 
B4A B5A B10A B12A 0.5(5) . . . . ? 
C1A B6A B10A B5A 39.2(3) . . . . ? 
C2A B6A B10A B5A 98.3(4) . . . . ? 
B11A B6A B10A B5A 137.0(4) . . . . ? 
C1A B6A B10A B11A -97.8(4) . . . . ? 
C2A B6A B10A B11A -38.7(3) . . . . ? 
B5A B6A B10A B11A -137.0(4) . . . . ? 
C1A B6A B10A B9A 1.8(5) . . . . ? 
C2A B6A B10A B9A 60.9(4) . . . . ? 
B5A B6A B10A B9A -37.4(3) . . . . ? 
B11A B6A B10A B9A 99.6(4) . . . . ? 
C1A B6A B10A B12A -60.5(4) . . . . ? 
C2A B6A B10A B12A -1.4(5) . . . . ? 
B5A B6A B10A B12A -99.7(4) . . . . ? 
B11A B6A B10A B12A 37.3(4) . . . . ? 
B4A B9A B10A B5A -37.4(3) . . . . ? 
B12A B9A B10A B5A -138.2(4) . . . . ? 
B8A B9A B10A B5A -100.1(4) . . . . ? 
B4A B9A B10A B11A 63.9(4) . . . . ? 
B12A B9A B10A B11A -37.0(3) . . . . ? 
B5A B9A B10A B11A 101.3(4) . . . . ? 
B8A B9A B10A B11A 1.2(5) . . . . ? 
B4A B9A B10A B6A 0.3(5) . . . . ? 
B12A B9A B10A B6A -100.6(4) . . . . ? 
B5A B9A B10A B6A 37.7(3) . . . . ? 
B8A B9A B10A B6A -62.4(5) . . . . ? 
B4A B9A B10A B12A 100.8(4) . . . . ? 
B5A B9A B10A B12A 138.2(4) . . . . ? 
B8A B9A B10A B12A 38.2(3) . . . . ? 
C1A C2A B11A B10A -0.4(5) . . . . ? 
B7A C2A B11A B10A 103.6(5) . . . . ? 
B6A C2A B11A B10A -40.0(4) . . . . ? 
B3A C2A B11A B10A 66.5(5) . . . . ? 
C1A C2A B11A B12A -63.9(4) . . . . ? 
B7A C2A B11A B12A 40.1(4) . . . . ? 
B6A C2A B11A B12A -103.5(4) . . . . ? 
B3A C2A B11A B12A 3.0(5) . . . . ? 
C1A C2A B11A B7A -104.0(4) . . . . ? 
B6A C2A B11A B7A -143.6(4) . . . . ? 
B3A C2A B11A B7A -37.1(4) . . . . ? 
C1A C2A B11A B6A 39.6(4) . . . . ? 
B7A C2A B11A B6A 143.6(4) . . . . ? 
B3A C2A B11A B6A 106.5(4) . . . . ? 
B5A B10A B11A C2A 1.1(5) . . . . ? 
B6A B10A B11A C2A 39.6(4) . . . . ? 
B9A B10A B11A C2A -61.7(5) . . . . ? 
B12A B10A B11A C2A -98.4(4) . . . . ? 
B5A B10A B11A B12A 99.5(4) . . . . ? 
B6A B10A B11A B12A 138.0(4) . . . . ? 
B9A B10A B11A B12A 36.7(3) . . . . ? 
B5A B10A B11A B7A 62.3(5) . . . . ? 
B6A B10A B11A B7A 100.8(4) . . . . ? 
B9A B10A B11A B7A -0.5(5) . . . . ? 
B12A B10A B11A B7A -37.2(4) . . . . ? 
B5A B10A B11A B6A -38.5(4) . . . . ? 
B9A B10A B11A B6A -101.3(4) . . . . ? 
B12A B10A B11A B6A -138.0(4) . . . . ? 
B12A B7A B11A C2A 134.0(4) . . . . ? 
B3A B7A B11A C2A 33.9(3) . . . . ? 
B8A B7A B11A C2A 96.0(4) . . . . ? 
C2A B7A B11A B10A -96.4(4) . . . . ? 
B12A B7A B11A B10A 37.6(4) . . . . ? 
B3A B7A B11A B10A -62.4(5) . . . . ? 
B8A B7A B11A B10A -0.4(5) . . . . ? 
C2A B7A B11A B12A -134.0(4) . . . . ? 
B3A B7A B11A B12A -100.1(4) . . . . ? 
B8A B7A B11A B12A -38.1(4) . . . . ? 
C2A B7A B11A B6A -32.5(3) . . . . ? 
B12A B7A B11A B6A 101.5(4) . . . . ? 
B3A B7A B11A B6A 1.4(5) . . . . ? 
B8A B7A B11A B6A 63.4(5) . . . . ? 
C1A B6A B11A C2A -36.1(3) . . . . ? 
B5A B6A B11A C2A -96.5(4) . . . . ? 
B10A B6A B11A C2A -134.3(4) . . . . ? 
C1A B6A B11A B10A 98.2(4) . . . . ? 
C2A B6A B11A B10A 134.3(4) . . . . ? 
B5A B6A B11A B10A 37.8(3) . . . . ? 
C1A B6A B11A B12A 59.9(4) . . . . ? 
C2A B6A B11A B12A 96.0(4) . . . . ? 
B5A B6A B11A B12A -0.4(4) . . . . ? 
B10A B6A B11A B12A -38.3(4) . . . . ? 
C1A B6A B11A B7A -3.9(5) . . . . ? 
C2A B6A B11A B7A 32.2(3) . . . . ? 
B5A B6A B11A B7A -64.3(4) . . . . ? 
B10A B6A B11A B7A -102.1(5) . . . . ? 
B4A B9A B12A B11A -64.2(5) . . . . ? 
B5A B9A B12A B11A -0.2(5) . . . . ? 
B10A B9A B12A B11A 37.1(3) . . . . ? 
B8A B9A B12A B11A -101.1(4) . . . . ? 
B4A B9A B12A B7A -0.5(6) . . . . ? 
B5A B9A B12A B7A 63.5(5) . . . . ? 
B10A B9A B12A B7A 100.7(5) . . . . ? 
B8A B9A B12A B7A -37.4(4) . . . . ? 
B4A B9A B12A B10A -101.2(4) . . . . ? 
B5A B9A B12A B10A -37.2(3) . . . . ? 
B8A B9A B12A B10A -138.2(4) . . . . ? 
B4A B9A B12A B8A 36.9(4) . . . . ? 
B5A B9A B12A B8A 100.9(4) . . . . ? 
B10A B9A B12A B8A 138.2(4) . . . . ? 
C2A B11A B12A B9A 62.3(4) . . . . ? 
B10A B11A B12A B9A -37.4(3) . . . . ? 
B7A B11A B12A B9A 101.5(4) . . . . ? 
B6A B11A B12A B9A 0.4(5) . . . . ? 
C2A B11A B12A B7A -39.2(3) . . . . ? 
B10A B11A B12A B7A -138.9(4) . . . . ? 
B6A B11A B12A B7A -101.1(4) . . . . ? 
C2A B11A B12A B10A 99.7(4) . . . . ? 
B7A B11A B12A B10A 138.9(4) . . . . ? 
B6A B11A B12A B10A 37.8(3) . . . . ? 
C2A B11A B12A B8A -1.6(5) . . . . ? 
B10A B11A B12A B8A -101.3(4) . . . . ? 
B7A B11A B12A B8A 37.6(4) . . . . ? 
B6A B11A B12A B8A -63.5(5) . . . . ? 
C2A B7A B12A B9A -61.0(5) . . . . ? 
B3A B7A B12A B9A 1.0(6) . . . . ? 
B11A B7A B12A B9A -100.1(4) . . . . ? 
B8A B7A B12A B9A 37.7(4) . . . . ? 
C2A B7A B12A B11A 39.2(3) . . . . ? 
B3A B7A B12A B11A 101.2(4) . . . . ? 
B8A B7A B12A B11A 137.9(4) . . . . ? 
C2A B7A B12A B10A 2.6(5) . . . . ? 
B3A B7A B12A B10A 64.7(5) . . . . ? 
B11A B7A B12A B10A -36.5(4) . . . . ? 
B8A B7A B12A B10A 101.3(4) . . . . ? 
C2A B7A B12A B8A -98.7(4) . . . . ? 
B3A B7A B12A B8A -36.7(4) . . . . ? 
B11A B7A B12A B8A -137.9(4) . . . . ? 
B5A B10A B12A B9A 36.9(3) . . . . ? 
B11A B10A B12A B9A 138.1(4) . . . . ? 
B6A B10A B12A B9A 100.4(4) . . . . ? 
B5A B10A B12A B11A -101.1(4) . . . . ? 
B6A B10A B12A B11A -37.7(4) . . . . ? 
B9A B10A B12A B11A -138.1(4) . . . . ? 
B5A B10A B12A B7A -64.2(5) . . . . ? 
B11A B10A B12A B7A 36.9(4) . . . . ? 
B6A B10A B12A B7A -0.8(5) . . . . ? 
B9A B10A B12A B7A -101.1(4) . . . . ? 
B5A B10A B12A B8A -0.8(5) . . . . ? 
B11A B10A B12A B8A 100.3(4) . . . . ? 
B6A B10A B12A B8A 62.6(5) . . . . ? 
B9A B10A B12A B8A -37.8(4) . . . . ? 
B3A B8A B12A B9A -100.5(4) . . . . ? 
B4A B8A B12A B9A -36.8(3) . . . . ? 
B7A B8A B12A B9A -138.1(4) . . . . ? 
B3A B8A B12A B11A -0.2(5) . . . . ? 
B4A B8A B12A B11A 63.6(5) . . . . ? 
B7A B8A B12A B11A -37.8(4) . . . . ? 
B9A B8A B12A B11A 100.4(4) . . . . ? 
B3A B8A B12A B7A 37.6(4) . . . . ? 
B4A B8A B12A B7A 101.4(4) . . . . ? 
B9A B8A B12A B7A 138.1(4) . . . . ? 
B3A B8A B12A B10A -63.0(5) . . . . ? 
B4A B8A B12A B10A 0.8(5) . . . . ? 
B7A B8A B12A B10A -100.6(4) . . . . ? 
B9A B8A B12A B10A 37.6(4) . . . . ? 
C4A N2A C3A N1A 179.5(3) . . . . ? 
C4A N2A C3A N4A 0.3(5) . . . . ? 
B3A N1A C3A N2A 177.0(4) . . . . ? 
B3A N1A C3A N4A -3.7(6) . . . . ? 
C5A N4A C3A N2A 0.9(5) . . . . ? 
C5A N4A C3A N1A -178.3(3) . . . . ? 
C3A N2A C4A N5A 177.3(3) . . . . ? 
C3A N2A C4A N3A -1.0(5) . . . . ? 
N6A N5A C4A N2A -1.3(5) . . . . ? 
N6A N5A C4A N3A 177.2(3) . . . . ? 
C5A N3A C4A N2A 0.4(5) . . . . ? 
C5A N3A C4A N5A -177.9(3) . . . . ? 
C3A N4A C5A N3A -1.8(6) . . . . ? 
C3A N4A C5A N7A 177.2(3) . . . . ? 
C4A N3A C5A N4A 1.1(5) . . . . ? 
C4A N3A C5A N7A -177.8(3) . . . . ? 
N9A N7A C5A N4A 179.5(3) . . . . ? 
N8A N7A C5A N4A -3.0(5) . . . . ? 
N9A N7A C5A N3A -1.4(5) . . . . ? 
N8A N7A C5A N3A 176.1(3) . . . . ? 
N5A N6A C6A O1A 9.9(5) . . . . ? 
N5A N6A C6A C7A -171.2(3) . . . . ? 
O1A C6A C7A C12A 163.7(4) . . . . ? 
N6A C6A C7A C12A -15.2(6) . . . . ? 
O1A C6A C7A C8A -16.2(6) . . . . ? 
N6A C6A C7A C8A 165.0(3) . . . . ? 
C12A C7A C8A C9A 1.9(6) . . . . ? 
C6A C7A C8A C9A -178.2(4) . . . . ? 
C7A C8A C9A C10A -1.4(7) . . . . ? 
C8A C9A C10A C11A -0.3(7) . . . . ? 
C9A C10A C11A C12A 1.4(7) . . . . ? 
C8A C7A C12A C11A -0.7(6) . . . . ? 
C6A C7A C12A C11A 179.4(4) . . . . ? 
C10A C11A C12A C7A -0.9(7) . . . . ? 
N7A N8A C13A N10A 0.1(4) . . . . ? 
N7A N8A C13A C14A 177.7(3) . . . . ? 
N9A N10A C13A N8A 0.1(4) . . . . ? 
N9A N10A C13A C14A -177.5(3) . . . . ? 
N8A C13A C14A C15A -175.2(4) . . . . ? 
N10A C13A C14A C15A 2.1(6) . . . . ? 
N8A C13A C14A C19A 1.8(6) . . . . ? 
N10A C13A C14A C19A 179.1(4) . . . . ? 
C19A C14A C15A C16A -2.2(6) . . . . ? 
C13A C14A C15A C16A 174.8(4) . . . . ? 
C14A C15A C16A C17A 0.9(6) . . . . ? 
C15A C16A C17A C18A 0.9(7) . . . . ? 
C16A C17A C18A C19A -1.4(7) . . . . ? 
C17A C18A C19A C14A 0.2(6) . . . . ? 
C15A C14A C19A C18A 1.7(6) . . . . ? 
C13A C14A C19A C18A -175.3(4) . . . . ? 
C4B N5B N6B C6B 81.8(4) . . . . ? 
N9B N7B N8B C13B 0.4(4) . . . . ? 
C5B N7B N8B C13B 178.7(3) . . . . ? 
N8B N7B N9B N10B -0.9(4) . . . . ? 
C5B N7B N9B N10B -179.1(3) . . . . ? 
N7B N9B N10B C13B 0.9(4) . . . . ? 
B4B C1B C2B B11B 68.1(4) . . . . ? 
B5B C1B C2B B11B -0.4(4) . . . . ? 
B6B C1B C2B B11B -39.9(3) . . . . ? 
B3B C1B C2B B11B 108.8(3) . . . . ? 
B4B C1B C2B B7B -1.0(4) . . . . ? 
B5B C1B C2B B7B -69.6(4) . . . . ? 
B6B C1B C2B B7B -109.0(4) . . . . ? 
B3B C1B C2B B7B 39.6(3) . . . . ? 
B4B C1B C2B B6B 108.0(4) . . . . ? 
B5B C1B C2B B6B 39.5(3) . . . . ? 
B3B C1B C2B B6B 148.7(3) . . . . ? 
B4B C1B C2B B3B -40.7(3) . . . . ? 
B5B C1B C2B B3B -109.2(3) . . . . ? 
B6B C1B C2B B3B -148.7(3) . . . . ? 
C3B N1B B3B C1B -20.6(6) . . . . ? 
C3B N1B B3B C2B 47.8(6) . . . . ? 
C3B N1B B3B B8B -168.7(4) . . . . ? 
C3B N1B B3B B4B -92.0(5) . . . . ? 
C3B N1B B3B B7B 116.6(4) . . . . ? 
C2B C1B B3B N1B 108.8(4) . . . . ? 
B4B C1B B3B N1B -114.0(4) . . . . ? 
B5B C1B B3B N1B -150.0(4) . . . . ? 
B6B C1B B3B N1B 139.1(4) . . . . ? 
B4B C1B B3B C2B 137.2(3) . . . . ? 
B5B C1B B3B C2B 101.2(4) . . . . ? 
B6B C1B B3B C2B 30.4(3) . . . . ? 
C2B C1B B3B B8B -96.9(3) . . . . ? 
B4B C1B B3B B8B 40.4(3) . . . . ? 
B5B C1B B3B B8B 4.4(5) . . . . ? 
B6B C1B B3B B8B -66.5(4) . . . . ? 
C2B C1B B3B B4B -137.2(3) . . . . ? 
B5B C1B B3B B4B -36.0(4) . . . . ? 
B6B C1B B3B B4B -106.9(4) . . . . ? 
C2B C1B B3B B7B -34.8(3) . . . . ? 
B4B C1B B3B B7B 102.4(3) . . . . ? 
B5B C1B B3B B7B 66.4(4) . . . . ? 
B6B C1B B3B B7B -4.5(4) . . . . ? 
C1B C2B B3B N1B -111.4(4) . . . . ? 
B11B C2B B3B N1B 147.0(4) . . . . ? 
B7B C2B B3B N1B 109.9(4) . . . . ? 
B6B C2B B3B N1B -141.8(4) . . . . ? 
B11B C2B B3B C1B -101.6(4) . . . . ? 
B7B C2B B3B C1B -138.7(3) . . . . ? 
B6B C2B B3B C1B -30.4(3) . . . . ? 
C1B C2B B3B B8B 97.7(3) . . . . ? 
B11B C2B B3B B8B -3.9(5) . . . . ? 
B7B C2B B3B B8B -41.0(3) . . . . ? 
B6B C2B B3B B8B 67.2(4) . . . . ? 
C1B C2B B3B B4B 36.1(3) . . . . ? 
B11B C2B B3B B4B -65.5(4) . . . . ? 
B7B C2B B3B B4B -102.7(3) . . . . ? 
B6B C2B B3B B4B 5.6(4) . . . . ? 
C1B C2B B3B B7B 138.7(3) . . . . ? 
B11B C2B B3B B7B 37.1(4) . . . . ? 
B6B C2B B3B B7B 108.3(4) . . . . ? 
C2B C1B B4B B9B -63.3(4) . . . . ? 
B5B C1B B4B B9B 40.5(3) . . . . ? 
B6B C1B B4B B9B 4.0(5) . . . . ? 
B3B C1B B4B B9B -103.3(4) . . . . ? 
C2B C1B B4B B8B -0.3(4) . . . . ? 
B5B C1B B4B B8B 103.5(4) . . . . ? 
B6B C1B B4B B8B 67.0(4) . . . . ? 
B3B C1B B4B B8B -40.4(3) . . . . ? 
C2B C1B B4B B5B -103.8(4) . . . . ? 
B6B C1B B4B B5B -36.5(4) . . . . ? 
B3B C1B B4B B5B -143.8(4) . . . . ? 
C2B C1B B4B B3B 40.0(3) . . . . ? 
B5B C1B B4B B3B 143.8(4) . . . . ? 
B6B C1B B4B B3B 107.3(4) . . . . ? 
N1B B3B B4B C1B 110.1(4) . . . . ? 
C2B B3B B4B C1B -35.6(3) . . . . ? 
B8B B3B B4B C1B -133.3(4) . . . . ? 
B7B B3B B4B C1B -95.1(3) . . . . ? 
N1B B3B B4B B9B -153.4(4) . . . . ? 
C1B B3B B4B B9B 96.5(4) . . . . ? 
C2B B3B B4B B9B 60.9(4) . . . . ? 
B8B B3B B4B B9B -36.8(3) . . . . ? 
B7B B3B B4B B9B 1.4(4) . . . . ? 
N1B B3B B4B B8B -116.6(5) . . . . ? 
C1B B3B B4B B8B 133.3(4) . . . . ? 
C2B B3B B4B B8B 97.7(3) . . . . ? 
B7B B3B B4B B8B 38.2(3) . . . . ? 
N1B B3B B4B B5B 142.4(4) . . . . ? 
C1B B3B B4B B5B 32.3(3) . . . . ? 
C2B B3B B4B B5B -3.3(4) . . . . ? 
B8B B3B B4B B5B -101.0(4) . . . . ? 
B7B B3B B4B B5B -62.8(4) . . . . ? 
C2B C1B B5B B9B 64.5(4) . . . . ? 
B4B C1B B5B B9B -39.6(3) . . . . ? 
B6B C1B B5B B9B 103.3(4) . . . . ? 
B3B C1B B5B B9B -3.6(5) . . . . ? 
C2B C1B B5B B6B -38.8(3) . . . . ? 
B4B C1B B5B B6B -142.9(4) . . . . ? 
B3B C1B B5B B6B -106.9(4) . . . . ? 
C2B C1B B5B B4B 104.1(3) . . . . ? 
B6B C1B B5B B4B 142.9(4) . . . . ? 
B3B C1B B5B B4B 36.0(4) . . . . ? 
C2B C1B B5B B10B 1.4(4) . . . . ? 
B4B C1B B5B B10B -102.7(4) . . . . ? 
B6B C1B B5B B10B 40.2(3) . . . . ? 
B3B C1B B5B B10B -66.7(4) . . . . ? 
B9B B4B B5B C1B -133.8(4) . . . . ? 
B8B B4B B5B C1B -95.7(4) . . . . ? 
B3B B4B B5B C1B -32.4(3) . . . . ? 
C1B B4B B5B B9B 133.8(4) . . . . ? 
B8B B4B B5B B9B 38.1(3) . . . . ? 
B3B B4B B5B B9B 101.4(4) . . . . ? 
C1B B4B B5B B6B 32.8(3) . . . . ? 
B9B B4B B5B B6B -101.0(4) . . . . ? 
B8B B4B B5B B6B -63.0(4) . . . . ? 
B3B B4B B5B B6B 0.3(5) . . . . ? 
C1B B4B B5B B10B 95.7(4) . . . . ? 
B9B B4B B5B B10B -38.1(3) . . . . ? 
B8B B4B B5B B10B 0.0(4) . . . . ? 
B3B B4B B5B B10B 63.3(4) . . . . ? 
B11B C2B B6B C1B 138.0(3) . . . . ? 
B7B C2B B6B C1B 102.2(4) . . . . ? 
B3B C2B B6B C1B 30.4(3) . . . . ? 
C1B C2B B6B B10B -98.3(4) . . . . ? 
B11B C2B B6B B10B 39.8(3) . . . . ? 
B7B C2B B6B B10B 3.9(5) . . . . ? 
B3B C2B B6B B10B -67.9(4) . . . . ? 
C1B C2B B6B B11B -138.0(3) . . . . ? 
B7B C2B B6B B11B -35.9(4) . . . . ? 
B3B C2B B6B B11B -107.6(4) . . . . ? 
C1B C2B B6B B5B -35.9(3) . . . . ? 
B11B C2B B6B B5B 102.1(4) . . . . ? 
B7B C2B B6B B5B 66.2(4) . . . . ? 
B3B C2B B6B B5B -5.5(5) . . . . ? 
B4B C1B B6B C2B -101.6(4) . . . . ? 
B5B C1B B6B C2B -138.2(4) . . . . ? 
B3B C1B B6B C2B -30.6(3) . . . . ? 
C2B C1B B6B B10B 97.7(4) . . . . ? 
B4B C1B B6B B10B -3.9(5) . . . . ? 
B5B C1B B6B B10B -40.6(3) . . . . ? 
B3B C1B B6B B10B 67.1(4) . . . . ? 
C2B C1B B6B B11B 35.8(3) . . . . ? 
B4B C1B B6B B11B -65.8(4) . . . . ? 
B5B C1B B6B B11B -102.4(4) . . . . ? 
B3B C1B B6B B11B 5.3(4) . . . . ? 
C2B C1B B6B B5B 138.2(4) . . . . ? 
B4B C1B B6B B5B 36.6(4) . . . . ? 
B3B C1B B6B B5B 107.7(4) . . . . ? 
C1B B5B B6B C2B 35.4(3) . . . . ? 
B9B B5B B6B C2B -59.6(4) . . . . ? 
B4B B5B B6B C2B 2.9(5) . . . . ? 
B10B B5B B6B C2B -98.1(4) . . . . ? 
B9B B5B B6B C1B -95.0(4) . . . . ? 
B4B B5B B6B C1B -32.5(3) . . . . ? 
B10B B5B B6B C1B -133.5(4) . . . . ? 
C1B B5B B6B B10B 133.5(4) . . . . ? 
B9B B5B B6B B10B 38.5(3) . . . . ? 
B4B B5B B6B B10B 101.0(4) . . . . ? 
C1B B5B B6B B11B 96.0(4) . . . . ? 
B9B B5B B6B B11B 1.0(5) . . . . ? 
B4B B5B B6B B11B 63.5(4) . . . . ? 
B10B B5B B6B B11B -37.5(3) . . . . ? 
C1B C2B B7B B12B 63.8(4) . . . . ? 
B11B C2B B7B B12B -40.1(3) . . . . ? 
B6B C2B B7B B12B -4.4(5) . . . . ? 
B3B C2B B7B B12B 102.6(3) . . . . ? 
C1B C2B B7B B11B 103.9(4) . . . . ? 
B6B C2B B7B B11B 35.8(4) . . . . ? 
B3B C2B B7B B11B 142.7(3) . . . . ? 
C1B C2B B7B B8B 1.9(4) . . . . ? 
B11B C2B B7B B8B -102.1(4) . . . . ? 
B6B C2B B7B B8B -66.3(4) . . . . ? 
B3B C2B B7B B8B 40.6(3) . . . . ? 
C1B C2B B7B B3B -38.8(3) . . . . ? 
B11B C2B B7B B3B -142.7(3) . . . . ? 
B6B C2B B7B B3B -106.9(4) . . . . ? 
N1B B3B B7B C2B -109.7(4) . . . . ? 
C1B B3B B7B C2B 34.5(3) . . . . ? 
B8B B3B B7B C2B 132.5(4) . . . . ? 
B4B B3B B7B C2B 94.4(3) . . . . ? 
N1B B3B B7B B12B 154.8(4) . . . . ? 
C1B B3B B7B B12B -60.9(4) . . . . ? 
C2B B3B B7B B12B -95.5(4) . . . . ? 
B8B B3B B7B B12B 37.0(3) . . . . ? 
B4B B3B B7B B12B -1.0(4) . . . . ? 
N1B B3B B7B B11B -142.5(4) . . . . ? 
C1B B3B B7B B11B 1.7(4) . . . . ? 
C2B B3B B7B B11B -32.8(3) . . . . ? 
B8B B3B B7B B11B 99.7(4) . . . . ? 
B4B B3B B7B B11B 61.6(4) . . . . ? 
N1B B3B B7B B8B 117.8(4) . . . . ? 
C1B B3B B7B B8B -97.9(3) . . . . ? 
C2B B3B B7B B8B -132.5(4) . . . . ? 
B4B B3B B7B B8B -38.1(3) . . . . ? 
N1B B3B B8B B4B 113.7(5) . . . . ? 
C1B B3B B8B B4B -39.2(3) . . . . ? 
C2B B3B B8B B4B -97.6(3) . . . . ? 
B7B B3B B8B B4B -137.2(4) . . . . ? 
N1B B3B B8B B9B 149.7(4) . . . . ? 
C1B B3B B8B B9B -3.2(4) . . . . ? 
C2B B3B B8B B9B -61.6(4) . . . . ? 
B4B B3B B8B B9B 36.0(3) . . . . ? 
B7B B3B B8B B9B -101.2(4) . . . . ? 
N1B B3B B8B B12B -146.2(4) . . . . ? 
C1B B3B B8B B12B 60.9(4) . . . . ? 
C2B B3B B8B B12B 2.5(4) . . . . ? 
B4B B3B B8B B12B 100.1(4) . . . . ? 
B7B B3B B8B B12B -37.1(3) . . . . ? 
N1B B3B B8B B7B -109.1(5) . . . . ? 
C1B B3B B8B B7B 98.0(3) . . . . ? 
C2B B3B B8B B7B 39.6(3) . . . . ? 
B4B B3B B8B B7B 137.2(4) . . . . ? 
C1B B4B B8B B3B 40.2(3) . . . . ? 
B9B B4B B8B B3B 139.5(3) . . . . ? 
B5B B4B B8B B3B 101.6(3) . . . . ? 
C1B B4B B8B B9B -99.3(4) . . . . ? 
B5B B4B B8B B9B -37.9(3) . . . . ? 
B3B B4B B8B B9B -139.5(3) . . . . ? 
C1B B4B B8B B12B -61.6(4) . . . . ? 
B9B B4B B8B B12B 37.7(3) . . . . ? 
B5B B4B B8B B12B -0.2(4) . . . . ? 
B3B B4B B8B B12B -101.8(4) . . . . ? 
C1B B4B B8B B7B 1.4(4) . . . . ? 
B9B B4B B8B B7B 100.8(4) . . . . ? 
B5B B4B B8B B7B 62.9(4) . . . . ? 
B3B B4B B8B B7B -38.7(3) . . . . ? 
C2B B7B B8B B3B -40.6(3) . . . . ? 
B12B B7B B8B B3B -138.5(4) . . . . ? 
B11B B7B B8B B3B -101.1(4) . . . . ? 
C2B B7B B8B B4B -2.0(4) . . . . ? 
B12B B7B B8B B4B -99.9(4) . . . . ? 
B11B B7B B8B B4B -62.5(4) . . . . ? 
B3B B7B B8B B4B 38.6(3) . . . . ? 
C2B B7B B8B B9B 60.7(4) . . . . ? 
B12B B7B B8B B9B -37.2(3) . . . . ? 
B11B B7B B8B B9B 0.2(5) . . . . ? 
B3B B7B B8B B9B 101.3(4) . . . . ? 
C2B B7B B8B B12B 97.9(4) . . . . ? 
B11B B7B B8B B12B 37.4(3) . . . . ? 
B3B B7B B8B B12B 138.5(4) . . . . ? 
C1B B4B B9B B5B -39.7(3) . . . . ? 
B8B B4B B9B B5B -138.0(4) . . . . ? 
B3B B4B B9B B5B -101.7(4) . . . . ? 
C1B B4B B9B B8B 98.2(3) . . . . ? 
B5B B4B B9B B8B 138.0(4) . . . . ? 
B3B B4B B9B B8B 36.3(3) . . . . ? 
C1B B4B B9B B12B 60.8(4) . . . . ? 
B8B B4B B9B B12B -37.5(3) . . . . ? 
B5B B4B B9B B12B 100.5(4) . . . . ? 
B3B B4B B9B B12B -1.2(4) . . . . ? 
C1B B4B B9B B10B -2.3(4) . . . . ? 
B8B B4B B9B B10B -100.6(4) . . . . ? 
B5B B4B B9B B10B 37.4(3) . . . . ? 
B3B B4B B9B B10B -64.3(4) . . . . ? 
C1B B5B B9B B4B 39.0(3) . . . . ? 
B6B B5B B9B B4B 100.0(4) . . . . ? 
B10B B5B B9B B4B 137.9(4) . . . . ? 
C1B B5B B9B B8B 1.2(4) . . . . ? 
B6B B5B B9B B8B 62.3(4) . . . . ? 
B4B B5B B9B B8B -37.8(3) . . . . ? 
B10B B5B B9B B8B 100.1(4) . . . . ? 
C1B B5B B9B B12B -61.9(4) . . . . ? 
B6B B5B B9B B12B -0.9(4) . . . . ? 
B4B B5B B9B B12B -100.9(4) . . . . ? 
B10B B5B B9B B12B 37.0(3) . . . . ? 
C1B B5B B9B B10B -98.9(4) . . . . ? 
B6B B5B B9B B10B -37.9(3) . . . . ? 
B4B B5B B9B B10B -137.9(4) . . . . ? 
B3B B8B B9B B4B -36.6(3) . . . . ? 
B12B B8B B9B B4B -137.9(4) . . . . ? 
B7B B8B B9B B4B -101.0(4) . . . . ? 
B3B B8B B9B B5B 1.3(5) . . . . ? 
B4B B8B B9B B5B 37.9(3) . . . . ? 
B12B B8B B9B B5B -100.0(4) . . . . ? 
B7B B8B B9B B5B -63.1(4) . . . . ? 
B3B B8B B9B B12B 101.3(4) . . . . ? 
B4B B8B B9B B12B 137.9(3) . . . . ? 
B7B B8B B9B B12B 36.9(3) . . . . ? 
B3B B8B B9B B10B 64.2(4) . . . . ? 
B4B B8B B9B B10B 100.9(4) . . . . ? 
B12B B8B B9B B10B -37.0(3) . . . . ? 
B7B B8B B9B B10B -0.2(5) . . . . ? 
C2B B6B B10B B11B -38.9(3) . . . . ? 
C1B B6B B10B B11B -98.2(4) . . . . ? 
B5B B6B B10B B11B -137.9(4) . . . . ? 
C2B B6B B10B B5B 98.9(4) . . . . ? 
C1B B6B B10B B5B 39.7(3) . . . . ? 
B11B B6B B10B B5B 137.9(4) . . . . ? 
C2B B6B B10B B12B -1.6(4) . . . . ? 
C1B B6B B10B B12B -60.9(4) . . . . ? 
B11B B6B B10B B12B 37.3(3) . . . . ? 
B5B B6B B10B B12B -100.5(4) . . . . ? 
C2B B6B B10B B9B 61.4(4) . . . . ? 
C1B B6B B10B B9B 2.1(5) . . . . ? 
B11B B6B B10B B9B 100.3(4) . . . . ? 
B5B B6B B10B B9B -37.6(3) . . . . ? 
C1B B5B B10B B11B -1.9(4) . . . . ? 
B9B B5B B10B B11B -99.6(4) . . . . ? 
B6B B5B B10B B11B 37.9(3) . . . . ? 
B4B B5B B10B B11B -62.3(4) . . . . ? 
C1B B5B B10B B6B -39.7(3) . . . . ? 
B9B B5B B10B B6B -137.4(4) . . . . ? 
B4B B5B B10B B6B -100.2(4) . . . . ? 
C1B B5B B10B B12B 60.7(4) . . . . ? 
B9B B5B B10B B12B -37.0(3) . . . . ? 
B6B B5B B10B B12B 100.5(4) . . . . ? 
B4B B5B B10B B12B 0.3(4) . . . . ? 
C1B B5B B10B B9B 97.7(3) . . . . ? 
B6B B5B B10B B9B 137.4(4) . . . . ? 
B4B B5B B10B B9B 37.3(3) . . . . ? 
B4B B9B B10B B11B 63.6(4) . . . . ? 
B5B B9B B10B B11B 101.4(4) . . . . ? 
B8B B9B B10B B11B 0.1(5) . . . . ? 
B12B B9B B10B B11B -37.0(3) . . . . ? 
B4B B9B B10B B6B 0.1(5) . . . . ? 
B5B B9B B10B B6B 37.9(4) . . . . ? 
B8B B9B B10B B6B -63.4(5) . . . . ? 
B12B B9B B10B B6B -100.5(4) . . . . ? 
B4B B9B B10B B5B -37.8(3) . . . . ? 
B8B B9B B10B B5B -101.3(4) . . . . ? 
B12B B9B B10B B5B -138.4(4) . . . . ? 
B4B B9B B10B B12B 100.6(4) . . . . ? 
B5B B9B B10B B12B 138.4(4) . . . . ? 
B8B B9B B10B B12B 37.1(3) . . . . ? 
C1B C2B B11B B12B -64.2(4) . . . . ? 
B7B C2B B11B B12B 40.7(3) . . . . ? 
B6B C2B B11B B12B -103.4(4) . . . . ? 
B3B C2B B11B B12B 3.6(5) . . . . ? 
C1B C2B B11B B10B -0.8(4) . . . . ? 
B7B C2B B11B B10B 104.1(4) . . . . ? 
B6B C2B B11B B10B -40.0(3) . . . . ? 
B3B C2B B11B B10B 67.0(4) . . . . ? 
C1B C2B B11B B6B 39.2(3) . . . . ? 
B7B C2B B11B B6B 144.1(4) . . . . ? 
B3B C2B B11B B6B 107.0(4) . . . . ? 
C1B C2B B11B B7B -104.9(3) . . . . ? 
B6B C2B B11B B7B -144.1(4) . . . . ? 
B3B C2B B11B B7B -37.1(3) . . . . ? 
B6B B10B B11B C2B 39.4(3) . . . . ? 
B5B B10B B11B C2B 1.6(4) . . . . ? 
B12B B10B B11B C2B -98.3(4) . . . . ? 
B9B B10B B11B C2B -61.0(4) . . . . ? 
B6B B10B B11B B12B 137.7(4) . . . . ? 
B5B B10B B11B B12B 99.9(4) . . . . ? 
B9B B10B B11B B12B 37.3(3) . . . . ? 
B5B B10B B11B B6B -37.8(3) . . . . ? 
B12B B10B B11B B6B -137.7(4) . . . . ? 
B9B B10B B11B B6B -100.5(4) . . . . ? 
B6B B10B B11B B7B 100.5(4) . . . . ? 
B5B B10B B11B B7B 62.7(4) . . . . ? 
B12B B10B B11B B7B -37.2(3) . . . . ? 
B9B B10B B11B B7B 0.1(5) . . . . ? 
C1B B6B B11B C2B -35.4(3) . . . . ? 
B10B B6B B11B C2B -134.1(3) . . . . ? 
B5B B6B B11B C2B -96.4(3) . . . . ? 
C2B B6B B11B B12B 95.6(4) . . . . ? 
C1B B6B B11B B12B 60.2(4) . . . . ? 
B10B B6B B11B B12B -38.4(3) . . . . ? 
B5B B6B B11B B12B -0.7(5) . . . . ? 
C2B B6B B11B B10B 134.1(3) . . . . ? 
C1B B6B B11B B10B 98.7(4) . . . . ? 
B5B B6B B11B B10B 37.7(3) . . . . ? 
C2B B6B B11B B7B 31.7(3) . . . . ? 
C1B B6B B11B B7B -3.7(4) . . . . ? 
B10B B6B B11B B7B -102.4(4) . . . . ? 
B5B B6B B11B B7B -64.7(4) . . . . ? 
B12B B7B B11B C2B 133.2(4) . . . . ? 
B8B B7B B11B C2B 95.5(4) . . . . ? 
B3B B7B B11B C2B 33.2(3) . . . . ? 
C2B B7B B11B B12B -133.2(4) . . . . ? 
B8B B7B B11B B12B -37.7(3) . . . . ? 
B3B B7B B11B B12B -100.1(4) . . . . ? 
C2B B7B B11B B10B -95.7(4) . . . . ? 
B12B B7B B11B B10B 37.6(4) . . . . ? 
B8B B7B B11B B10B -0.2(5) . . . . ? 
B3B B7B B11B B10B -62.5(4) . . . . ? 
C2B B7B B11B B6B -31.9(3) . . . . ? 
B12B B7B B11B B6B 101.3(4) . . . . ? 
B8B B7B B11B B6B 63.6(4) . . . . ? 
B3B B7B B11B B6B 1.2(4) . . . . ? 
C2B B11B B12B B7B -39.7(3) . . . . ? 
B10B B11B B12B B7B -139.0(4) . . . . ? 
B6B B11B B12B B7B -101.1(4) . . . . ? 
C2B B11B B12B B8B -1.7(5) . . . . ? 
B10B B11B B12B B8B -100.9(4) . . . . ? 
B6B B11B B12B B8B -63.0(4) . . . . ? 
B7B B11B B12B B8B 38.1(3) . . . . ? 
C2B B11B B12B B10B 99.3(4) . . . . ? 
B6B B11B B12B B10B 37.9(3) . . . . ? 
B7B B11B B12B B10B 139.0(4) . . . . ? 
C2B B11B B12B B9B 61.6(4) . . . . ? 
B10B B11B B12B B9B -37.7(3) . . . . ? 
B6B B11B B12B B9B 0.2(5) . . . . ? 
B7B B11B B12B B9B 101.3(4) . . . . ? 
C2B B7B B12B B11B 39.5(3) . . . . ? 
B8B B7B B12B B11B 137.6(4) . . . . ? 
B3B B7B B12B B11B 101.0(4) . . . . ? 
C2B B7B B12B B8B -98.0(4) . . . . ? 
B11B B7B B12B B8B -137.6(4) . . . . ? 
B3B B7B B12B B8B -36.6(3) . . . . ? 
C2B B7B B12B B10B 2.9(4) . . . . ? 
B11B B7B B12B B10B -36.6(3) . . . . ? 
B8B B7B B12B B10B 101.0(4) . . . . ? 
B3B B7B B12B B10B 64.4(4) . . . . ? 
C2B B7B B12B B9B -61.1(4) . . . . ? 
B11B B7B B12B B9B -100.7(4) . . . . ? 
B8B B7B B12B B9B 36.9(3) . . . . ? 
B3B B7B B12B B9B 0.3(4) . . . . ? 
B3B B8B B12B B11B -0.6(5) . . . . ? 
B4B B8B B12B B11B 63.5(4) . . . . ? 
B9B B8B B12B B11B 100.6(4) . . . . ? 
B7B B8B B12B B11B -38.1(3) . . . . ? 
B3B B8B B12B B7B 37.5(3) . . . . ? 
B4B B8B B12B B7B 101.6(4) . . . . ? 
B9B B8B B12B B7B 138.7(4) . . . . ? 
B3B B8B B12B B10B -63.7(4) . . . . ? 
B4B B8B B12B B10B 0.4(4) . . . . ? 
B9B B8B B12B B10B 37.5(3) . . . . ? 
B7B B8B B12B B10B -101.2(4) . . . . ? 
B3B B8B B12B B9B -101.2(4) . . . . ? 
B4B B8B B12B B9B -37.1(3) . . . . ? 
B7B B8B B12B B9B -138.7(4) . . . . ? 
B6B B10B B12B B11B -37.8(3) . . . . ? 
B5B B10B B12B B11B -101.2(4) . . . . ? 
B9B B10B B12B B11B -138.0(4) . . . . ? 
B11B B10B B12B B7B 37.0(3) . . . . ? 
B6B B10B B12B B7B -0.8(5) . . . . ? 
B5B B10B B12B B7B -64.2(4) . . . . ? 
B9B B10B B12B B7B -101.0(4) . . . . ? 
B11B B10B B12B B8B 100.8(4) . . . . ? 
B6B B10B B12B B8B 63.0(4) . . . . ? 
B5B B10B B12B B8B -0.4(4) . . . . ? 
B9B B10B B12B B8B -37.2(3) . . . . ? 
B11B B10B B12B B9B 138.0(4) . . . . ? 
B6B B10B B12B B9B 100.2(4) . . . . ? 
B5B B10B B12B B9B 36.8(3) . . . . ? 
B4B B9B B12B B11B -63.4(4) . . . . ? 
B5B B9B B12B B11B 0.5(4) . . . . ? 
B8B B9B B12B B11B -101.0(4) . . . . ? 
B10B B9B B12B B11B 37.3(3) . . . . ? 
B4B B9B B12B B7B 0.5(4) . . . . ? 
B5B B9B B12B B7B 64.4(4) . . . . ? 
B8B B9B B12B B7B -37.1(3) . . . . ? 
B10B B9B B12B B7B 101.2(4) . . . . ? 
B4B B9B B12B B8B 37.7(3) . . . . ? 
B5B B9B B12B B8B 101.5(4) . . . . ? 
B10B B9B B12B B8B 138.3(4) . . . . ? 
B4B B9B B12B B10B -100.7(4) . . . . ? 
B5B B9B B12B B10B -36.9(3) . . . . ? 
B8B B9B B12B B10B -138.3(4) . . . . ? 
C4B N2B C3B N4B 1.1(5) . . . . ? 
C4B N2B C3B N1B -179.5(3) . . . . ? 
C5B N4B C3B N2B -2.3(5) . . . . ? 
C5B N4B C3B N1B 178.3(3) . . . . ? 
B3B N1B C3B N2B 176.0(4) . . . . ? 
B3B N1B C3B N4B -4.5(6) . . . . ? 
C3B N2B C4B N3B 1.6(5) . . . . ? 
C3B N2B C4B N5B 179.7(3) . . . . ? 
C5B N3B C4B N2B -2.6(5) . . . . ? 
C5B N3B C4B N5B 179.2(3) . . . . ? 
N6B N5B C4B N2B 6.1(5) . . . . ? 
N6B N5B C4B N3B -175.5(3) . . . . ? 
C4B N3B C5B N4B 1.1(6) . . . . ? 
C4B N3B C5B N7B -178.6(3) . . . . ? 
C3B N4B C5B N3B 1.1(6) . . . . ? 
C3B N4B C5B N7B -179.2(3) . . . . ? 
N8B N7B C5B N3B -176.4(3) . . . . ? 
N9B N7B C5B N3B 1.7(5) . . . . ? 
N8B N7B C5B N4B 3.9(5) . . . . ? 
N9B N7B C5B N4B -178.0(3) . . . . ? 
N5B N6B C6B O1B 7.9(6) . . . . ? 
N5B N6B C6B C7B -173.0(3) . . . . ? 
O1B C6B C7B C8B -33.4(6) . . . . ? 
N6B C6B C7B C8B 147.5(4) . . . . ? 
O1B C6B C7B C12B 145.8(4) . . . . ? 
N6B C6B C7B C12B -33.3(6) . . . . ? 
C12B C7B C8B C9B 0.6(7) . . . . ? 
C6B C7B C8B C9B 179.8(4) . . . . ? 
C7B C8B C9B C10B -1.9(8) . . . . ? 
C8B C9B C10B C11B 1.8(9) . . . . ? 
C9B C10B C11B C12B -0.4(10) . . . . ? 
C10B C11B C12B C7B -0.9(9) . . . . ? 
C8B C7B C12B C11B 0.8(7) . . . . ? 
C6B C7B C12B C11B -178.4(4) . . . . ? 
N7B N8B C13B N10B 0.2(4) . . . . ? 
N7B N8B C13B C14B 180.0(3) . . . . ? 
N9B N10B C13B N8B -0.7(4) . . . . ? 
N9B N10B C13B C14B 179.5(4) . . . . ? 
N8B C13B C14B C19B 6.3(6) . . . . ? 
N10B C13B C14B C19B -173.9(4) . . . . ? 
N8B C13B C14B C15B -174.5(4) . . . . ? 
N10B C13B C14B C15B 5.2(6) . . . . ? 
C19B C14B C15B C16B -0.2(6) . . . . ? 
C13B C14B C15B C16B -179.3(4) . . . . ? 
C14B C15B C16B C17B 0.8(6) . . . . ? 
C15B C16B C17B C18B -0.9(6) . . . . ? 
C16B C17B C18B C19B 0.4(6) . . . . ? 
C17B C18B C19B C14B 0.2(6) . . . . ? 
C15B C14B C19B C18B -0.3(6) . . . . ? 
C13B C14B C19B C18B 178.8(4) . . . . ?

loop_
_geom_hbond_atom_site_label_D
_geom_hbond_atom_site_label_H
_geom_hbond_atom_site_label_A
_geom_hbond_distance_DH
_geom_hbond_distance_HA
_geom_hbond_distance_DA
_geom_hbond_angle_DHA
_geom_hbond_site_symmetry_A
_geom_hbond_publ_flag
N5A     H5AA    O1B         0.8800     2.0400   2.835(4)     150.00     .   yes
N5B     H5BA    O1A         0.8800     2.0700   2.871(4)     151.00     .   yes
N5B     H5BA    N6B         0.8800     2.6200   3.281(5)     132.00   2_676 yes
N6B     H6BA    O1A         0.8800     2.1900   2.891(6)     137.00   2_676 yes

  
_refine_diff_density_max    0.270 
_refine_diff_density_min   -0.288 
_refine_diff_density_rms    0.063 
  

# SQUEEZE RESULTS (Version =  70515)
# Note: Data are Listed for all Voids in the P1 Unit Cell
# i.e. Centre of Gravity, Solvent Accessible Volume,
# Recovered number of Electrons in the Void and
# Details about the Squeezed Material
loop_
  _platon_squeeze_void_nr
  _platon_squeeze_void_average_x
  _platon_squeeze_void_average_y
  _platon_squeeze_void_average_z
  _platon_squeeze_void_volume
  _platon_squeeze_void_count_electrons
  _platon_squeeze_void_content
   1  0.500  0.500  0.000       395       163 ' '
_platon_squeeze_void_probe_radius                  1.20
_platon_squeeze_details                           
;
TITL aa        P -1         R = 0.23
CELL   14.0890   15.4420   16.3750    109.64     95.43    116.64
SPGR P-1
# Solvent Accessible Volume =     406.1
# Electrons Found in S.A.V. =     163.3
# Note: Atoms in Void as Cxxx and Qxxx all others
C101 0.371 0.628 0.206 !      18.00 eA-3
C102 0.205 0.448 0.048 !      11.88 eA-3
C103 0.551 0.515 0.089 !       5.01 eA-3
C104 0.301 0.598 0.089 !       4.81 eA-3
C105 0.557 0.599 0.066 !       3.44 eA-3
C106 0.409 0.617 0.123 !       3.05 eA-3
C107 0.474 0.408-0.007 !       2.97 eA-3
C108 0.293 0.505 0.086 !       1.55 eA-3
C109 0.452 0.556 0.127 !       1.53 eA-3
C110 0.389 0.626 0.074 !       1.27 eA-3
Q111 0.027 0.358 0.486 !       1.21 eA-3
Q112 0.436 0.718 0.255 !       1.17 eA-3
Q113 0.811 0.190 0.123 !       1.16 eA-3
Q114 0.592 0.823 0.360 !       1.15 eA-3
Q115 0.513 0.388 0.503 !       1.10 eA-3
C116 0.567 0.668 0.101 !       1.05 eA-3
Q117 0.018 0.861 0.404 !       1.02 eA-3
Q118 0.392 0.455 0.275 !       1.02 eA-3
C119 0.596 0.499 0.017 !       0.99 eA-3
C120 0.459 0.528 0.065 !       0.98 eA-3
Q121 0.658 0.473 0.311 !       0.97 eA-3
Q122 0.720 0.893 0.134 !       0.96 eA-3
C123 0.235 0.547 0.029 !       0.96 eA-3
Q124 0.065 0.658 0.143 !       0.96 eA-3
Q125 0.279 0.923 0.365 !       0.95 eA-3
C126 0.686 0.637 0.109 !       0.95 eA-3
Q127 0.390 0.184 0.506 !       0.95 eA-3
C128 0.317 0.530 0.170 !       0.94 eA-3
Q129 0.676 0.891 0.134 !       0.94 eA-3
C130 0.811 0.681 0.043 !       0.93 eA-3
Q131 0.822 0.360 0.002 !       0.93 eA-3
C132 0.598 0.683 0.032 !       0.92 eA-3
C133 0.137 0.375-0.007 !       0.92 eA-3
Q134 0.968 0.544 0.156 !       0.92 eA-3
C135 0.505 0.626 0.074 !       0.92 eA-3
C136 0.347 0.446 0.074 !       0.92 eA-3
C137 0.399 0.566 0.172 !       0.91 eA-3
C138 0.367 0.510 0.059 !       0.90 eA-3
Q139 0.264 0.105 0.101 !       0.90 eA-3
Q140 0.721 0.250 0.013 !       0.89 eA-3
C141 0.234 0.602 0.060 !       0.88 eA-3
Q142 0.284 0.991 0.342 !       0.87 eA-3
C143 0.640 0.692 0.087 !       0.86 eA-3
Q144 0.795 0.312 0.045 !       0.85 eA-3
Q145 0.138 0.578 0.205 !       0.85 eA-3
C146 0.468 0.333 0.003 !       0.85 eA-3
Q147 0.670 0.298 0.188 !       0.85 eA-3
C148 0.305 0.641 0.182 !       0.84 eA-3
Q149 0.487 0.274 0.018 !       0.84 eA-3
C150 0.481 0.572 0.173 !       0.83 eA-3
Q151 0.575 0.068 0.174 !       0.83 eA-3
C152 0.358 0.412 0.043 !       0.83 eA-3
Q153 0.313 0.307 0.206 !       0.83 eA-3
Q154 0.125 0.636 0.219 !       0.83 eA-3
C155 0.782 0.646 0.095 !       0.82 eA-3
C156 0.694 0.550 0.080 !       0.82 eA-3
C157 0.751 0.529 0.035 !       0.81 eA-3
Q158 0.811 0.908 0.293 !       0.81 eA-3
Q159 0.580 0.142 0.034 !       0.81 eA-3
Q160 0.185 0.248 0.157 !       0.80 eA-3
Q161 0.614 0.404 0.091 !       0.80 eA-3
Q162 0.079 0.589 0.161 !       0.80 eA-3
C163 0.052 0.437 0.094 !       0.79 eA-3
Q164 0.518 0.735 0.046 !       0.79 eA-3
Q165 1.005 0.030 0.062 !       0.79 eA-3
C166 0.534 0.668 0.045 !       0.79 eA-3
Q167 0.626 0.135 0.138 !       0.78 eA-3
Q168 0.218 0.848 0.297 !       0.78 eA-3
Q169 0.284 0.257 0.121 !       0.78 eA-3
Q170 0.547 0.334 0.099 !       0.78 eA-3
Q171 0.750 0.703 0.014 !       0.78 eA-3
Q172 0.612 0.827 0.266 !       0.77 eA-3
Q173 0.828 0.301 0.188 !       0.76 eA-3
Q174 0.595 0.763 0.295 !       0.76 eA-3
Q175 0.785 0.220 0.012 !       0.76 eA-3
Q176 0.577 0.115 0.169 !       0.76 eA-3
Q177 0.490 0.641 0.355 !       0.76 eA-3
Q178 0.167 0.173 0.084 !       0.75 eA-3
C179 0.313 0.584 0.249 !       0.75 eA-3
Q180 0.566 0.210 0.048 !       0.75 eA-3
Q181 0.859 0.583 0.075 !       0.75 eA-3
Q182 0.361 0.266 0.266 !       0.75 eA-3
Q183 0.723 0.439 0.034 !       0.74 eA-3
Q184 0.686 0.933 0.189 !       0.74 eA-3
Q185 0.533 0.732 0.112 !       0.74 eA-3
C186 0.293 0.667 0.123 !       0.74 eA-3
Q187 0.421 0.919 0.359 !       0.73 eA-3
Q188 0.703 0.311 0.046 !       0.73 eA-3
Q189 0.308 0.454 0.120 !       0.73 eA-3
Q190 0.856 0.795 0.145 !       0.72 eA-3
Q191 0.915 0.580 0.046 !       0.72 eA-3
C192 0.412 0.453 0.035 !       0.72 eA-3
Q193 0.094 0.140 0.107 !       0.72 eA-3
Q194 0.187 0.515 0.403 !       0.71 eA-3
Q195 0.342 0.808 0.047 !       0.71 eA-3
Q196 0.203 0.027 0.223 !       0.71 eA-3
Q197 0.641 0.456 0.060 !       0.71 eA-3
Q198 0.864 0.172 0.088 !       0.71 eA-3
Q199 0.253 0.741 0.280 !       0.71 eA-3
;


_shelx_res_file 
; 
  
    aa_sq.res created by SHELXL-2014/7 
  
  
TITL aa in P-1 
CELL 0.71073  14.08880  15.44160  16.37540 109.6452  95.4262 116.6412 
ZERR    4.00   0.00240   0.00260   0.00280   0.0036   0.0037   0.0035 
LATT  1 
SFAC C H B N CL O 
UNIT 80 104 40 40 8 4 
  
TEMP -153.000 
SIZE 0.05 0.25 0.35 
  
acta 
omit -4 52 
  
omit     0   0   1 
omit     1  -1   1 
omit     0  -1   2 
omit     1  -2   2 
omit     0   1   1 
omit     0   1   0 
omit     0   0   2 
omit     0  -2   1 
omit    -1   1   0 
omit    -6 -10  13 
omit    -5   1   3 
omit    -1   2   0 
  
L.S. 5 0   92 
BOND $H 
FMAP 2 
PLAN 20 
conf 
  
ABIN 
WGHT    0.075200 
FVAR       0.09163 
O1A   6    0.545734    0.870744    0.384146    11.00000    0.03930    0.04177 = 
         0.03187    0.01791    0.01754    0.03053 
N1A   4    0.397869    0.445127    0.257349    11.00000    0.03345    0.02664 = 
         0.01652    0.00454    0.00661    0.01429 
AFIX  43 
H1AA  2    0.423587    0.471205    0.218833    11.00000   -1.20000 
AFIX   0 
N2A   4    0.510090    0.619497    0.365992    11.00000    0.02411    0.01912 = 
         0.02168    0.00722    0.00471    0.01269 
N3A   4    0.503536    0.658566    0.520293    11.00000    0.02739    0.02328 = 
         0.01794    0.00943    0.00750    0.01733 
N4A   4    0.391315    0.479575    0.404235    11.00000    0.02271    0.02061 = 
         0.01769    0.00579    0.00357    0.01180 
N5A   4    0.620180    0.788709    0.481235    11.00000    0.03357    0.01810 = 
         0.01554    0.00730    0.00860    0.01292 
AFIX  43 
H5AA  2    0.641852    0.834704    0.538218    11.00000   -1.20000 
AFIX   0 
N6A   4    0.666651    0.821749    0.418922    11.00000    0.02571    0.02610 = 
         0.02765    0.01542    0.01118    0.01680 
AFIX  43 
H6AA  2    0.727573    0.821234    0.411859    11.00000   -1.20000 
AFIX   0 
N7A   4    0.379188    0.516279    0.549545    11.00000    0.02180    0.02127 = 
         0.01700    0.00670    0.00664    0.01383 
N8A   4    0.298622    0.414437    0.522574    11.00000    0.01981    0.01945 = 
         0.02759    0.01199    0.00847    0.01089 
N9A   4    0.405581    0.578679    0.637723    11.00000    0.02864    0.03039 = 
         0.02163    0.01021    0.01049    0.01884 
N10A  4    0.340533    0.516034    0.670953    11.00000    0.02918    0.02766 = 
         0.02850    0.01478    0.01574    0.01840 
C1A   1    0.323328    0.250154    0.270981    11.00000    0.02505    0.02526 = 
         0.02168    0.00931    0.00613    0.01150 
AFIX   3 
H1A   2    0.380778    0.286695    0.328981    11.00000   -1.20000 
AFIX   0 
C2A   1    0.216807    0.268178    0.263450    11.00000    0.02075    0.02719 = 
         0.03482    0.00266    0.00521    0.01164 
AFIX   3 
H2A   2    0.207547    0.314608    0.315930    11.00000   -1.20000 
AFIX   0 
B3A   3    0.320234    0.328902    0.218354    11.00000    0.03286    0.02620 = 
         0.01779    0.00250   -0.00189    0.01682 
B4A   3    0.361998    0.234315    0.175032    11.00000    0.04504    0.03159 = 
         0.02281    0.00998    0.01413    0.02220 
AFIX 153 
H4A   2    0.449253    0.260545    0.172190    11.00000   -1.20000 
AFIX   0 
B5A   3    0.286210    0.123518    0.200416    11.00000    0.03999    0.02710 = 
         0.02913    0.00954    0.00705    0.01846 
AFIX 153 
H5A   2    0.323346    0.077247    0.214043    11.00000   -1.20000 
AFIX   0 
B6A   3    0.196566    0.148729    0.261240    11.00000    0.03279    0.02238 = 
         0.03629    0.00602    0.00793    0.00791 
AFIX 153 
H6A   2    0.175154    0.121347    0.315679    11.00000   -1.20000 
AFIX   0 
B7A   3    0.176597    0.266058    0.161305    11.00000    0.03363    0.03094 = 
         0.04789    0.00235   -0.01489    0.01556 
AFIX 153 
H7A   2    0.139395    0.312999    0.149410    11.00000   -1.20000 
AFIX   0 
B8A   3    0.270041    0.243404    0.102635    11.00000    0.06814    0.03129 = 
         0.01687    0.00250   -0.00126    0.02552 
AFIX 153 
H8A   2    0.295247    0.275266    0.051250    11.00000   -1.20000 
AFIX   0 
B9A   3    0.247099    0.114691    0.090895    11.00000    0.06964    0.03131 = 
         0.02150    0.00499    0.00357    0.02794 
AFIX 153 
H9A   2    0.256719    0.061119    0.030592    11.00000   -1.20000 
AFIX   0 
B10A  3    0.144099    0.060758    0.143847    11.00000    0.03829    0.02333 = 
         0.03103    0.00166   -0.00818    0.01202 
AFIX 153 
H10A  2    0.086202   -0.027386    0.119403    11.00000   -1.20000 
AFIX   0 
B11A  3    0.101111    0.154381    0.186274    11.00000    0.01663    0.02209 = 
         0.06903    0.00605   -0.00871    0.00370 
AFIX 153 
H11A  2    0.014289    0.128294    0.190332    11.00000   -1.20000 
AFIX   0 
B12A  3    0.132799    0.133942    0.081664    11.00000    0.05155    0.02721 = 
         0.04456    0.00083   -0.01846    0.01145 
AFIX 153 
H12A  2    0.067279    0.093548    0.015529    11.00000   -1.20000 
AFIX   0 
C3A   1    0.434696    0.516883    0.344677    11.00000    0.02277    0.02830 = 
         0.02022    0.00893    0.00662    0.01832 
C4A   1    0.541246    0.685271    0.453976    11.00000    0.01935    0.01872 = 
         0.01891    0.00664    0.00396    0.01320 
C5A   1    0.429230    0.554786    0.486779    11.00000    0.02307    0.02613 = 
         0.02197    0.01117    0.00565    0.01996 
C6A   1    0.621004    0.855167    0.367969    11.00000    0.02742    0.01608 = 
         0.01734    0.00439    0.00547    0.01197 
C7A   1    0.670546    0.872400    0.294883    11.00000    0.03537    0.02595 = 
         0.02439    0.01158    0.01271    0.02364 
C8A   1    0.612355    0.881413    0.227228    11.00000    0.04470    0.03493 = 
         0.02949    0.01368    0.01140    0.02593 
AFIX  43 
H8AA  2    0.543998    0.878447    0.230146    11.00000   -1.20000 
AFIX   0 
C9A   1    0.653355    0.894635    0.155915    11.00000    0.05816    0.04073 = 
         0.02356    0.01656    0.01053    0.02862 
AFIX  43 
H9AA  2    0.612179    0.899060    0.109646    11.00000   -1.20000 
AFIX   0 
C10A  1    0.753094    0.901362    0.151827    11.00000    0.06660    0.04130 = 
         0.03159    0.01969    0.03207    0.03492 
AFIX  43 
H10C  2    0.780665    0.910108    0.102663    11.00000   -1.20000 
AFIX   0 
C11A  1    0.814098    0.895365    0.219856    11.00000    0.05525    0.04813 = 
         0.04171    0.02518    0.02739    0.03478 
AFIX  43 
H11C  2    0.883988    0.901588    0.217999    11.00000   -1.20000 
AFIX   0 
C12A  1    0.771664    0.880214    0.290296    11.00000    0.04774    0.04532 = 
         0.03095    0.02353    0.02192    0.03364 
AFIX  43 
H12C  2    0.812669    0.875113    0.336158    11.00000   -1.20000 
AFIX   0 
C13A  1    0.275711    0.416173    0.599913    11.00000    0.02236    0.02712 = 
         0.02819    0.01281    0.01186    0.02025 
C14A  1    0.188291    0.323329    0.607257    11.00000    0.02429    0.02607 = 
         0.04000    0.01847    0.01553    0.01953 
C15A  1    0.163639    0.333068    0.688510    11.00000    0.04145    0.03545 = 
         0.04609    0.02370    0.02779    0.02741 
AFIX  43 
H15A  2    0.207490    0.398616    0.741246    11.00000   -1.20000 
AFIX   0 
C16A  1    0.074605    0.246860    0.693029    11.00000    0.04628    0.05136 = 
         0.06378    0.03759    0.03858    0.03726 
AFIX  43 
H16A  2    0.057209    0.254135    0.748722    11.00000   -1.20000 
AFIX   0 
C17A  1    0.011095    0.150322    0.616610    11.00000    0.02803    0.03908 = 
         0.08812    0.04228    0.02443    0.02239 
AFIX  43 
H17A  2   -0.050272    0.091962    0.619708    11.00000   -1.20000 
AFIX   0 
C18A  1    0.037619    0.139452    0.535744    11.00000    0.02639    0.02791 = 
         0.06498    0.02464    0.00515    0.01441 
AFIX  43 
H18A  2   -0.004780    0.072883    0.483788    11.00000   -1.20000 
AFIX   0 
C19A  1    0.125834    0.225232    0.530026    11.00000    0.03001    0.03027 = 
         0.04485    0.02296    0.01439    0.02017 
AFIX  43 
H19A  2    0.143646    0.217537    0.474452    11.00000   -1.20000 
AFIX   0 
O1B   6    0.720586    0.988090    0.635133    11.00000    0.02963    0.02707 = 
         0.02813    0.00666    0.00352    0.01333 
N1B   4    0.406356    0.883790    0.801451    11.00000    0.02482    0.02219 = 
         0.01773    0.00812    0.00760    0.00559 
AFIX  43 
H1BA  2    0.460627    0.949700    0.836148    11.00000   -1.20000 
AFIX   0 
N2B   4    0.467023    0.921504    0.684843    11.00000    0.02762    0.02696 = 
         0.02512    0.01473    0.01339    0.01632 
N3B   4    0.374986    0.781215    0.532499    11.00000    0.02432    0.02473 = 
         0.02597    0.01245    0.01039    0.01435 
N4B   4    0.319950    0.746436    0.656939    11.00000    0.02482    0.02296 = 
         0.01905    0.00863    0.00872    0.01364 
N5B   4    0.517164    0.946755    0.560541    11.00000    0.02727    0.02774 = 
         0.01884    0.00952    0.00797    0.01350 
AFIX  43 
H5BA  2    0.504596    0.924535    0.501482    11.00000   -1.20000 
AFIX   0 
N6B   4    0.602907    1.047640    0.617783    11.00000    0.03601    0.02129 = 
         0.03110    0.01289    0.01334    0.01835 
AFIX  43 
H6BA  2    0.594112    1.103048    0.629142    11.00000   -1.20000 
AFIX   0 
N7B   4    0.233949    0.613892    0.509925    11.00000    0.02337    0.02705 = 
         0.02047    0.01102    0.00662    0.01572 
N8B   4    0.163107    0.544976    0.537038    11.00000    0.02018    0.02441 = 
         0.02833    0.01188    0.00873    0.01356 
N9B   4    0.219109    0.573054    0.420233    11.00000    0.03752    0.03469 = 
         0.02130    0.00783    0.01104    0.01956 
N10B  4    0.136710    0.473586    0.387778    11.00000    0.03290    0.02964 = 
         0.02532    0.00784    0.00780    0.01634 
C1B   1    0.207165    0.717216    0.795992    11.00000    0.02563    0.02407 = 
         0.02667    0.00687    0.00583    0.01060 
AFIX   3 
H1B   2    0.177245    0.698318    0.732042    11.00000   -1.20000 
AFIX   0 
C2B   1    0.306934    0.698458    0.828920    11.00000    0.04063    0.02405 = 
         0.02350    0.00732    0.01534    0.02291 
AFIX   3 
H2B   2    0.336324    0.664128    0.785320    11.00000   -1.20000 
AFIX   0 
B3B   3    0.339038    0.826914    0.848799    11.00000    0.02407    0.02124 = 
         0.02273    0.00578    0.00346    0.00914 
B4B   3    0.219074    0.829197    0.873965    11.00000    0.02658    0.03186 = 
         0.02977    0.01361    0.01534    0.01936 
AFIX 153 
H4B   2    0.192793    0.881709    0.858124    11.00000   -1.20000 
AFIX   0 
B5B   3    0.118691    0.699538    0.861238    11.00000    0.03143    0.03013 = 
         0.03661    0.01100    0.01919    0.01137 
AFIX 153 
H5B   2    0.027351    0.667009    0.837333    11.00000   -1.20000 
AFIX   0 
B6B   3    0.176176    0.615682    0.828581    11.00000    0.04146    0.01851 = 
         0.03849    0.01381    0.02066    0.00876 
AFIX 153 
H6B   2    0.123543    0.528360    0.782027    11.00000   -1.20000 
AFIX   0 
B7B   3    0.396665    0.796701    0.930942    11.00000    0.03781    0.03228 = 
         0.02496    0.01116    0.01280    0.01987 
AFIX 153 
H7B   2    0.487741    0.827119    0.952639    11.00000   -1.20000 
AFIX   0 
B8B   3    0.339328    0.881386    0.962887    11.00000    0.03114    0.02623 = 
         0.02724    0.01171    0.01389    0.01458 
AFIX 153 
H8B   2    0.393406    0.969227    1.007305    11.00000   -1.20000 
AFIX   0 
B9B   3    0.203581    0.804488    0.970588    11.00000    0.03618    0.02356 = 
         0.03129    0.01202    0.01600    0.01268 
AFIX 153 
H9B   2    0.168306    0.841819    1.020049    11.00000   -1.20000 
AFIX   0 
B10B  3    0.176375    0.670132    0.942692    11.00000    0.05550    0.02074 = 
         0.04031    0.01085    0.02717    0.01909 
AFIX 153 
H10B  2    0.123162    0.618706    0.973509    11.00000   -1.20000 
AFIX   0 
B11B  3    0.295243    0.667714    0.918800    11.00000    0.04511    0.03480 = 
         0.03212    0.01878    0.02009    0.02508 
AFIX 153 
H11B  2    0.320498    0.613822    0.933075    11.00000   -1.20000 
AFIX   0 
B12B  3    0.313173    0.783418    1.006095    11.00000    0.05202    0.02932 = 
         0.03101    0.01919    0.02146    0.02375 
AFIX 153 
H12B  2    0.349799    0.806789    1.079174    11.00000   -1.20000 
AFIX   0 
C3B   1    0.397607    0.849951    0.711517    11.00000    0.02129    0.02560 = 
         0.02817    0.01221    0.00931    0.01568 
C4B   1    0.451804    0.881325    0.595116    11.00000    0.02626    0.03187 = 
         0.02909    0.01910    0.01554    0.02313 
C5B   1    0.316794    0.723342    0.571234    11.00000    0.02023    0.02483 = 
         0.02677    0.01073    0.00715    0.01728 
C6B   1    0.701472    1.062064    0.656974    11.00000    0.03343    0.02266 = 
         0.02441    0.01134    0.01694    0.01298 
C7B   1    0.784585    1.172242    0.726234    11.00000    0.03970    0.02573 = 
         0.03349    0.00772    0.02558    0.00650 
C8B   1    0.855678    1.181786    0.797703    11.00000    0.03214    0.04574 = 
         0.02547    0.00085    0.01041   -0.00004 
AFIX  43 
H8BA  2    0.849833    1.119367    0.800931    11.00000   -1.20000 
AFIX   0 
C9B   1    0.934807    1.281543    0.864087    11.00000    0.04375    0.06742 = 
         0.03348    0.00014    0.02101   -0.01239 
AFIX  43 
H9BA  2    0.982246    1.288596    0.914185    11.00000   -1.20000 
AFIX   0 
C10B  1    0.943660    1.371115    0.856203    11.00000    0.08901    0.04958 = 
         0.04988   -0.01525    0.04618   -0.02760 
AFIX  43 
H10D  2    0.999415    1.440109    0.900724    11.00000   -1.20000 
AFIX   0 
C11B  1    0.874172    1.363076    0.785893    11.00000    0.13265    0.02381 = 
         0.07667    0.01026    0.06793    0.00638 
AFIX  43 
H11D  2    0.881970    1.426047    0.782489    11.00000   -1.20000 
AFIX   0 
C12B  1    0.792332    1.262991    0.719574    11.00000    0.08662    0.02859 = 
         0.05627    0.01927    0.04723    0.02217 
AFIX  43 
H12D  2    0.743029    1.256451    0.671064    11.00000   -1.20000 
AFIX   0 
C13B  1    0.103081    0.457993    0.459635    11.00000    0.02835    0.02829 = 
         0.02314    0.00616    0.00311    0.02082 
C14B  1    0.011369    0.356579    0.452116    11.00000    0.01915    0.02696 = 
         0.03131    0.01205    0.00298    0.01299 
C15B  1   -0.040892    0.266296    0.368222    11.00000    0.03240    0.03811 = 
         0.02863    0.01097    0.00434    0.02198 
AFIX  43 
H15B  2   -0.016962    0.270041    0.316545    11.00000   -1.20000 
AFIX   0 
C16B  1   -0.128077    0.171534    0.362105    11.00000    0.03551    0.02790 = 
         0.03416    0.00714   -0.00017    0.01784 
AFIX  43 
H16B  2   -0.163379    0.109758    0.305874    11.00000   -1.20000 
AFIX   0 
C17B  1   -0.164027    0.165876    0.436328    11.00000    0.02915    0.02993 = 
         0.04828    0.01349   -0.00001    0.01872 
AFIX  43 
H17B  2   -0.224518    0.100819    0.431017    11.00000   -1.20000 
AFIX   0 
C18B  1   -0.111750    0.255471    0.519155    11.00000    0.03423    0.03501 = 
         0.04162    0.01765    0.01342    0.02205 
AFIX  43 
H18B  2   -0.136330    0.251314    0.570503    11.00000   -1.20000 
AFIX   0 
C19B  1   -0.024197    0.350579    0.527217    11.00000    0.02774    0.02813 = 
         0.03208    0.01023    0.00541    0.01735 
AFIX  43 
H19B  2    0.011484    0.411606    0.583976    11.00000   -1.20000 
  
AFIX   0 
HKLF 4 
  
REM  aa in P-1 
REM R1 =  0.0720 for    5302 Fo > 4sig(Fo)  and  0.1660 for all   11263 data 
REM    721 parameters refined using      0 restraints 
  
END 
  
WGHT      0.0752      0.0000 
  
REM Highest difference peak  0.270,  deepest hole -0.288,  1-sigma level  0.063 
Q1    1   0.2946  0.3344  0.0881  11.00000  0.05    0.27 
Q2    1   0.5245  0.8945  0.5087  11.00000  0.05    0.26 
Q3    1   0.1818  0.6420  1.0056  11.00000  0.05    0.26 
Q4    1   0.0439  0.1723  0.4298  11.00000  0.05    0.25 
Q5    1   0.4405  0.4911  0.0169  11.00000  0.05    0.25 
Q6    1   0.5651  1.0758  0.6508  11.00000  0.05    0.25 
Q7    1   0.1992  0.2137  0.1068  11.00000  0.05    0.25 
Q8    1   0.2380  0.2497  0.0335  11.00000  0.05    0.24 
Q9    1  -0.0192  0.6846  0.9409  11.00000  0.05    0.24 
Q10   1   0.7997  0.7500  0.2515  11.00000  0.05    0.24 
Q11   1   0.4006  0.6812  0.9250  11.00000  0.05    0.23 
Q12   1   0.3858  0.6848  0.9808  11.00000  0.05    0.23 
Q13   1   0.8617  0.9532  0.3513  11.00000  0.05    0.23 
Q14   1   0.5973  0.6679  0.3204  11.00000  0.05    0.23 
Q15   1   0.3031  0.5970  0.8908  11.00000  0.05    0.23 
Q16   1   0.5034  0.6034  0.5075  11.00000  0.05    0.23 
Q17   1   0.3826  0.1170  0.2107  11.00000  0.05    0.23 
Q18   1   1.0245  1.4466  0.8444  11.00000  0.05    0.23 
Q19   1   0.1420  0.5127  0.9183  11.00000  0.05    0.23 
Q20   1   0.2803  0.2484  0.0026  11.00000  0.05    0.22 
; 
_shelx_res_checksum   77684 
  
_shelx_hkl_file 
; 
  -2   0   0   86.45    4.69 
   2   0   0   83.74    4.63 
   2   0   0   86.54    4.66 
  -3   0   0    0.58    0.38 
   3   0   0    1.12    0.30 
   3   0   0    0.67    0.23 
  -4   0   0   30.93    1.88 
   4   0   0   30.08    1.84 
   4   0   0   29.92    1.76 
  -5   0   0   19.22    1.47 
   5   0   0   21.39    1.45 
   5   0   0   23.02    1.34 
  -6   0   0   16.05    1.22 
   6   0   0   13.91    1.05 
   6   0   0   17.18    1.20 
  -7   0   0   -0.39    0.35 
   7   0   0    0.28    0.30 
   7   0   0    0.29    0.38 
  -8   0   0   -0.40    0.47 
   8   0   0   -0.02    0.31 
   8   0   0   -0.04    0.40 
  -9   0   0   -0.60    0.47 
   9   0   0   -0.01    0.49 
   9   0   0    0.07    0.34 
 -10   0   0    5.18    0.95 
  10   0   0    6.18    0.96 
  10   0   0    5.39    0.71 
 -11   0   0    3.84    0.85 
  11   0   0    3.39    0.84 
  11   0   0    2.35    0.57 
 -12   0   0    3.12    0.97 
  12   0   0    3.06    0.81 
  12   0   0    4.35    0.88 
 -13   0   0    0.93    0.78 
  13   0   0    0.70    0.74 
 -14   0   0   -0.03    0.77 
  14   0   0    0.74    0.80 
 -15   0   0   -0.25    0.80 
  15   0   0   -0.60    0.66 
  15  -1   0    2.44    0.97 
 -15   1   0    1.25    0.84 
  14  -1   0   -0.41    0.64 
 -14   1   0   -0.27    0.62 
  13  -1   0    2.33    0.80 
 -13   1   0   -0.78    0.60 
  12  -1   0    1.30    0.68 
  12  -1   0    0.41    0.47 
 -12   1   0    0.31    0.67 
  11  -1   0    0.18    0.52 
  11  -1   0   -0.30    0.40 
 -11   1   0    0.36    0.65 
  10  -1   0    9.52    1.09 
  10  -1   0    8.11    0.86 
 -10   1   0    7.71    1.10 
   9  -1   0    3.21    0.55 
   9  -1   0    2.36    0.61 
  -9   1   0    2.84    0.67 
   8  -1   0    0.46    0.43 
   8  -1   0    0.83    0.36 
  -8   1   0    0.55    0.45 
   7  -1   0    0.86    0.42 
   7  -1   0    0.04    0.31 
  -7   1   0    0.49    0.48 
   6  -1   0    1.27    0.40 
   6  -1   0    1.97    0.40 
  -6   1   0    1.57    0.50 
   5  -1   0    0.46    0.31 
  -5   1   0    1.64    0.45 
   4  -1   0    2.30    0.35 
   4  -1   0    1.60    0.32 
   3  -1   0    0.03    0.24 
   3  -1   0    0.26    0.21 
  -3   1   0   -0.52    0.28 
   2  -1   0    7.43    0.53 
   2  -1   0    7.24    0.48 
  -2   1   0    7.39    0.54 
  -1   1   0    0.96    0.13 
   0   1   0   31.50    1.73 
  -1  -1   0    9.46    0.63 
  -1  -1   0    9.84    0.60 
   1   1   0    9.27    0.62 
   1   1   0    8.85    0.57 
  -2  -1   0   -0.03    0.23 
   2   1   0    0.11    0.24 
   2   1   0    0.13    0.18 
  -3  -1   0    9.60    0.81 
   3   1   0   10.73    0.70 
   3   1   0   10.43    0.82 
  -4  -1   0    2.87    0.53 
   4   1   0    2.86    0.47 
   4   1   0    2.39    0.36 
  -5  -1   0    9.51    0.95 
   5   1   0   11.74    0.83 
   5   1   0   12.76    1.00 
  -6  -1   0    3.17    0.68 
   6   1   0    2.24    0.50 
   6   1   0    3.58    0.46 
  -7  -1   0   -0.19    0.45 
   7   1   0    0.17    0.45 
   7   1   0    0.35    0.30 
  -8  -1   0    2.33    0.69 
   8   1   0    0.71    0.55 
   8   1   0    2.06    0.43 
  -9  -1   0    1.30    0.59 
   9   1   0    0.95    0.61 
   9   1   0    0.56    0.39 
 -10  -1   0    0.30    0.55 
  10   1   0    0.20    0.39 
  10   1   0    0.69    0.67 
 -11  -1   0    0.35    0.56 
  11   1   0   -0.74    0.59 
  11   1   0    0.10    0.41 
 -12  -1   0    1.78    0.74 
  12   1   0    0.68    0.69 
 -13  -1   0   -0.35    0.70 
  13   1   0    0.46    0.70 
 -14  -1   0   -0.12    0.74 
  14   1   0    0.39    0.85 
  15  -2   0    1.11    0.79 
 -15   2   0    1.00    0.80 
  14  -2   0    3.03    0.79 
 -14   2   0    2.91    0.99 
  13  -2   0    1.63    0.71 
  13  -2   0   -0.64    0.47 
 -13   2   0    0.82    0.65 
  12  -2   0    2.79    0.70 
  12  -2   0    3.72    0.67 
 -12   2   0    3.44    0.84 
  11  -2   0   -0.47    0.42 
  11  -2   0    0.07    0.52 
 -11   2   0   -0.86    0.45 
  10  -2   0    0.23    0.41 
  10  -2   0    0.40    0.41 
 -10   2   0    0.49    0.58 
   9  -2   0    0.05    0.38 
   9  -2   0    0.32    0.42 
  -9   2   0    0.67    0.54 
   8  -2   0    0.31    0.38 
   8  -2   0    0.61    0.42 
  -8   2   0    1.60    0.53 
   7  -2   0    9.38    0.87 
   7  -2   0    9.59    0.86 
  -7   2   0    9.42    0.98 
   6  -2   0    2.87    0.47 
   6  -2   0    2.09    0.40 
  -6   2   0    2.60    0.56 
   5  -2   0    2.29    0.37 
   5  -2   0    2.53    0.42 
  -5   2   0    3.01    0.49 
   4  -2   0   48.82    2.69 
   4  -2   0   48.46    2.74 
  -4   2   0   46.48    2.78 
   3  -2   0   10.23    0.64 
   3  -2   0    8.78    0.77 
  -3   2   0   11.03    0.77 
   2  -2   0   38.02    2.19 
   2  -2   0   38.98    2.10 
  -2   2   0   38.16    2.10 
  -2   2   0   39.33    2.20 
   1  -2   0    6.23    0.39 
  -1   2   0    6.75    0.40 
  -1   2   0    6.29    0.46 
  -1   2   0    6.51    0.48 
   0   2   0   34.82    2.01 
   0   2   0   36.52    2.03 
   0   2   0   36.73    2.02 
   1   2   0  232.53   12.72 
   1   2   0  238.54   12.76 
   1   2   0  238.61   12.76 
  -2  -2   0    7.41    0.67 
   2   2   0    6.42    0.61 
   2   2   0    6.52    0.51 
  -3  -2   0    7.43    0.72 
   3   2   0    6.76    0.55 
   3   2   0    6.25    0.65 
  -4  -2   0    9.85    0.93 
   4   2   0    9.31    0.68 
   4   2   0    7.42    0.80 
  -5  -2   0    1.34    0.50 
   5   2   0    1.64    0.48 
   5   2   0    2.65    0.39 
  -6  -2   0   36.58    2.37 
   6   2   0   37.14    2.34 
   6   2   0   35.25    2.13 
  -7  -2   0    6.67    0.95 
   7   2   0    8.67    0.76 
   7   2   0    9.49    1.04 
  -8  -2   0    1.67    0.72 
   8   2   0    1.94    0.44 
   8   2   0    2.31    0.63 
  -9  -2   0    5.24    1.02 
   9   2   0    7.32    0.76 
   9   2   0    4.72    0.89 
 -10  -2   0    0.34    0.63 
  10   2   0    0.80    0.41 
  10   2   0   -0.40    0.55 
 -11  -2   0    0.04    0.67 
  11   2   0    1.70    0.70 
 -12  -2   0   -0.27    0.66 
  12   2   0    0.04    0.64 
 -13  -2   0   -0.34    0.73 
  13   2   0   -0.97    0.63 
  16  -3   0    0.89    0.74 
 -16   3   0    0.98    0.90 
  15  -3   0    2.52    0.84 
 -15   3   0    1.51    0.89 
  14  -3   0    1.35    0.64 
  14  -3   0    0.66    0.58 
 -14   3   0   -1.06    0.60 
  13  -3   0   -0.65    0.52 
  13  -3   0    0.18    0.53 
 -13   3   0   -0.58    0.64 
  12  -3   0    0.20    0.50 
  12  -3   0   -0.30    0.46 
 -12   3   0   -0.34    0.52 
  11  -3   0    8.72    1.00 
  11  -3   0    8.28    0.98 
 -11   3   0    7.01    1.05 
  10  -3   0    3.73    0.69 
  10  -3   0    3.86    0.63 
 -10   3   0    5.61    0.92 
   9  -3   0    4.67    0.63 
   9  -3   0    4.80    0.70 
  -9   3   0    5.04    0.83 
   8  -3   0    2.94    0.56 
   8  -3   0    3.69    0.52 
  -8   3   0    1.52    0.59 
   7  -3   0    1.51    0.48 
   7  -3   0    2.34    0.41 
  -7   3   0    2.52    0.56 
   6  -3   0    1.26    0.42 
   6  -3   0    0.40    0.29 
  -6   3   0    1.24    0.45 
   5  -3   0   36.13    2.05 
   5  -3   0   37.12    2.16 
  -5   3   0   34.64    2.21 
   4  -3   0  197.92   11.02 
   4  -3   0  213.12   10.92 
  -4   3   0  197.22   11.05 
   3  -3   0   22.90    1.45 
   3  -3   0   23.04    1.27 
  -3   3   0   23.77    1.44 
  -3   3   0   22.77    1.27 
   2  -3   0   27.87    1.55 
   2  -3   0   27.95    1.68 
   2  -3   0   28.97    1.55 
  -2   3   0   28.70    1.68 
  -1   3   0   81.92    4.41 
  -1   3   0   79.46    4.34 
  -1   3   0   78.28    4.39 
   0   3   0  127.15    6.77 
   0   3   0  124.82    6.76 
   0   3   0  120.94    6.78 
   1   3   0    0.22    0.24 
   1   3   0    0.46    0.31 
   1   3   0    0.53    0.28 
  -2  -3   0    0.15    0.33 
   2   3   0    0.25    0.28 
   2   3   0    0.57    0.23 
  -3  -3   0    5.81    0.68 
   3   3   0    5.83    0.54 
   3   3   0    5.71    0.66 
  -4  -3   0   21.47    1.52 
   4   3   0   21.74    1.53 
   4   3   0   21.33    1.34 
  -5  -3   0   23.06    1.64 
   5   3   0   22.78    1.42 
   5   3   0   21.16    1.59 
  -6  -3   0    6.08    0.88 
   6   3   0    7.11    0.66 
   6   3   0    4.57    0.78 
  -7  -3   0   -0.46    0.44 
   7   3   0   -0.19    0.53 
   7   3   0    0.36    0.33 
  -8  -3   0   -0.02    0.58 
   8   3   0    0.38    0.55 
   8   3   0    0.99    0.38 
  -9  -3   0    3.13    0.82 
   9   3   0    4.26    0.88 
   9   3   0    3.48    0.56 
 -10  -3   0   -0.91    0.57 
  10   3   0   -0.95    0.62 
 -11  -3   0    0.71    0.74 
  11   3   0   -0.35    0.68 
 -12  -3   0    0.58    0.72 
  12   3   0   -0.21    0.76 
 -13  -3   0    0.96    0.80 
  13   3   0   -0.46    0.78 
  16  -4   0    0.47    0.67 
 -16   4   0    1.42    0.95 
  15  -4   0    2.52    0.73 
  15  -4   0    2.40    0.76 
 -15   4   0    1.90    0.83 
  14  -4   0   -0.35    0.49 
  14  -4   0    0.38    0.58 
 -14   4   0    0.01    0.73 
  13  -4   0    0.06    0.53 
  13  -4   0   -0.36    0.46 
 -13   4   0    0.58    0.72 
  12  -4   0    2.88    0.63 
  12  -4   0    1.90    0.68 
 -12   4   0    2.91    0.87 
  11  -4   0    8.55    0.94 
  11  -4   0    8.83    1.04 
 -11   4   0   10.63    1.29 
  10  -4   0    0.76    0.50 
  10  -4   0    0.38    0.36 
 -10   4   0   -0.04    0.49 
   9  -4   0    0.99    0.36 
   9  -4   0    0.56    0.48 
  -9   4   0    0.45    0.53 
   8  -4   0    5.85    0.65 
   8  -4   0    8.89    0.87 
  -8   4   0    8.30    0.96 
   7  -4   0    1.46    0.34 
   7  -4   0    1.35    0.49 
  -7   4   0    1.94    0.54 
   6  -4   0   -0.14    0.40 
   6  -4   0    0.55    0.24 
  -6   4   0    1.17    0.45 
   5  -4   0   30.61    1.93 
   5  -4   0   30.93    1.73 
  -5   4   0   30.60    1.94 
   4  -4   0  179.64    9.49 
   4  -4   0  176.14    9.66 
  -4   4   0  173.87    9.68 
  -4   4   0  177.83    9.49 
   3  -4   0    0.28    0.09 
   3  -4   0    0.32    0.31 
   3  -4   0    0.32    0.10 
  -3   4   0    0.38    0.34 
  -2   4   0    0.04    0.26 
  -2   4   0   -0.11    0.25 
  -2   4   0   -0.03    0.15 
  -1   4   0    7.35    0.57 
  -1   4   0    7.24    0.65 
  -1   4   0    7.52    0.69 
   0   4   0   57.93    3.27 
   0   4   0   57.11    3.26 
   0   4   0   59.11    3.32 
   1   4   0   -0.08    0.38 
   1   4   0    0.75    0.35 
   1   4   0    0.27    0.27 
  -2  -4   0   13.53    1.08 
   2   4   0   13.96    1.04 
   2   4   0   13.41    0.94 
  -3  -4   0   10.53    0.95 
   3   4   0   11.87    0.98 
   3   4   0   10.96    0.83 
  -4  -4   0    1.75    0.54 
   4   4   0    2.12    0.40 
   4   4   0    1.28    0.48 
  -5  -4   0    0.43    0.47 
   5   4   0    0.18    0.28 
   5   4   0    0.67    0.44 
  -6  -4   0    2.86    0.65 
   6   4   0    2.66    0.71 
   6   4   0    2.54    0.45 
  -7  -4   0    0.81    0.60 
   7   4   0    0.27    0.55 
   7   4   0    0.15    0.34 
  -8  -4   0   -0.22    0.56 
   8   4   0    0.59    0.37 
   8   4   0   -0.49    0.52 
  -9  -4   0    1.21    0.75 
   9   4   0    1.44    0.77 
 -10  -4   0    0.78    0.67 
  10   4   0    0.04    0.61 
 -11  -4   0    1.32    0.82 
  11   4   0    1.47    0.79 
 -12  -4   0   -0.91    0.69 
  12   4   0    0.45    0.77 
  16  -5   0    0.88    0.61 
 -16   5   0   -0.91    0.69 
  15  -5   0    0.05    0.52 
  15  -5   0    0.32    0.64 
 -15   5   0   -0.19    0.66 
  14  -5   0    1.02    0.54 
  14  -5   0    0.28    0.62 
 -14   5   0    2.60    0.84 
  13  -5   0    1.98    0.73 
  13  -5   0    1.56    0.54 
 -13   5   0    0.18    0.71 
  12  -5   0    1.22    0.48 
  12  -5   0    0.12    0.56 
 -12   5   0    0.41    0.66 
  11  -5   0   -0.17    0.36 
  11  -5   0    0.71    0.57 
 -11   5   0   -0.14    0.59 
  10  -5   0   -0.46    0.46 
  10  -5   0   -0.21    0.29 
 -10   5   0    0.45    0.51 
   9  -5   0    1.93    0.39 
   9  -5   0    1.94    0.56 
  -9   5   0    2.60    0.69 
   8  -5   0   19.55    1.26 
   8  -5   0   20.59    1.48 
  -8   5   0   18.49    1.53 
   7  -5   0   18.19    1.12 
   7  -5   0   18.05    1.39 
  -7   5   0   17.15    1.37 
   6  -5   0    2.00    0.25 
   6  -5   0    1.22    0.51 
  -6   5   0    2.41    0.58 
   5  -5   0    4.92    0.66 
   5  -5   0    4.64    0.34 
  -5   5   0    5.12    0.35 
  -5   5   0    5.16    0.69 
   4  -5   0    2.82    0.53 
  -4   5   0    2.41    0.52 
   3  -5   0    2.57    0.24 
   3  -5   0    1.65    0.41 
  -3   5   0    2.08    0.46 
  -2   5   0    3.92    0.38 
  -2   5   0    4.24    0.54 
  -2   5   0    5.11    0.58 
  -1   5   0    3.27    0.51 
  -1   5   0    2.81    0.46 
  -1   5   0    3.21    0.39 
   0   5   0   18.63    1.26 
   0   5   0   19.48    1.27 
   0   5   0   19.14    1.33 
   1   5   0   -0.25    0.32 
   1   5   0    0.56    0.30 
   1   5   0    0.37    0.35 
  -2  -5   0   16.14    1.24 
   2   5   0   15.86    1.20 
   2   5   0   15.10    1.08 
  -3  -5   0    5.11    0.77 
   3   5   0    5.03    0.69 
   3   5   0    5.05    0.57 
  -4  -5   0    0.70    0.46 
   4   5   0    1.13    0.35 
   4   5   0    0.32    0.45 
  -5  -5   0    1.07    0.54 
   5   5   0    0.52    0.33 
   5   5   0   -0.01    0.47 
  -6  -5   0    0.46    0.56 
   6   5   0    0.36    0.55 
   6   5   0    0.52    0.36 
  -7  -5   0    4.18    0.82 
   7   5   0    1.75    0.70 
   7   5   0    2.78    0.52 
  -8  -5   0    0.47    0.62 
   8   5   0    0.24    0.61 
   8   5   0    0.61    0.39 
  -9  -5   0    0.28    0.70 
   9   5   0    2.66    0.92 
 -10  -5   0    0.41    0.74 
  10   5   0   -0.54    0.67 
 -11  -5   0    0.53    0.71 
  11   5   0    0.38    0.80 
  17  -6   0    0.22    0.58 
 -17   6   0   -0.87    0.73 
  16  -6   0   -0.81    0.66 
  16  -6   0   -0.04    0.56 
 -16   6   0    0.22    0.76 
  15  -6   0    1.64    0.79 
  15  -6   0    1.15    0.58 
 -15   6   0    1.96    0.94 
  14  -6   0    1.03    0.72 
  14  -6   0    1.51    0.54 
 -14   6   0    1.05    0.71 
  13  -6   0    0.53    0.42 
  13  -6   0    0.66    0.64 
 -13   6   0   -0.60    0.63 
  12  -6   0    0.95    0.62 
  12  -6   0    0.72    0.40 
 -12   6   0   -0.79    0.47 
  11  -6   0    1.04    0.62 
  11  -6   0    0.59    0.36 
 -11   6   0    0.39    0.59 
  10  -6   0   -0.18    0.27 
  10  -6   0   -0.19    0.49 
 -10   6   0    0.10    0.49 
   9  -6   0    0.48    0.48 
   9  -6   0    1.20    0.30 
   8  -6   0    3.05    0.67 
   8  -6   0    4.02    0.41 
  -8   6   0    4.73    0.76 
   7  -6   0   15.01    0.94 
   7  -6   0   15.50    1.32 
  -7   6   0   16.86    1.28 
   6  -6   0    0.29    0.43 
   6  -6   0    0.01    0.11 
  -6   6   0    0.01    0.16 
  -6   6   0   -0.21    0.42 
   5  -6   0    4.57    0.67 
  -5   6   0    4.01    0.65 
   4  -6   0    0.69    0.47 
   4  -6   0    0.67    0.16 
  -4   6   0    0.84    0.39 
   3  -6   0    2.92    0.58 
  -3   6   0    3.25    0.52 
  -3   6   0    2.75    0.30 
  -2   6   0    6.58    0.72 
  -2   6   0    5.84    0.55 
  -2   6   0    5.72    0.67 
  -1   6   0   14.69    1.11 
  -1   6   0   15.89    1.13 
  -1   6   0   14.58    1.03 
   0   6   0    0.94    0.46 
   0   6   0    0.54    0.35 
   0   6   0    0.71    0.38 
   1   6   0   32.89    2.19 
   1   6   0   35.79    2.16 
   1   6   0   34.75    2.12 
   2   6   0    3.64    0.54 
   2   6   0    3.70    0.62 
  -3  -6   0    0.29    0.46 
   3   6   0    0.47    0.43 
   3   6   0    0.28    0.32 
  -4  -6   0    6.63    0.95 
   4   6   0    7.99    0.75 
   4   6   0    7.48    0.98 
  -5  -6   0    0.83    0.54 
   5   6   0    1.71    0.41 
   5   6   0    0.46    0.54 
  -6  -6   0   15.58    1.54 
   6   6   0   14.19    1.08 
   6   6   0   10.06    1.30 
  -7  -6   0   -0.45    0.57 
   7   6   0    0.56    0.40 
   7   6   0   -0.04    0.58 
  -8  -6   0   -0.11    0.65 
   8   6   0    1.05    0.70 
  -9  -6   0   -1.00    0.55 
   9   6   0    0.02    0.78 
 -10  -6   0   -0.51    0.68 
  10   6   0   -0.16    0.69 
 -11  -6   0    1.89    0.95 
  11   6   0    2.52    1.03 
  17  -7   0   -0.72    0.71 
 -17   7   0   -0.07    0.72 
  16  -7   0    0.21    0.82 
  16  -7   0    0.61    0.65 
 -16   7   0    1.81    0.96 
  15  -7   0   -0.07    0.42 
  15  -7   0   -0.16    0.71 
 -15   7   0   -0.02    0.66 
  14  -7   0    0.45    0.43 
  14  -7   0    0.38    0.74 
 -14   7   0   -0.25    0.70 
  13  -7   0    0.63    0.63 
  13  -7   0    1.13    0.41 
 -13   7   0    0.60    0.66 
  12  -7   0    0.02    0.63 
  12  -7   0   -0.30    0.30 
 -12   7   0   -0.39    0.59 
  11  -7   0   -0.32    0.54 
  11  -7   0    0.06    0.29 
 -11   7   0    0.33    0.58 
  10  -7   0    3.40    0.43 
  10  -7   0    3.75    0.77 
 -10   7   0    2.62    0.77 
   9  -7   0    3.24    0.74 
   9  -7   0    3.03    0.35 
  -9   7   0    2.37    0.65 
   8  -7   0   27.18    1.92 
   8  -7   0   25.86    1.51 
  -8   7   0   27.47    1.91 
   7  -7   0    2.61    0.60 
  -7   7   0    3.13    0.63 
   6  -7   0    9.96    1.02 
  -6   7   0    8.44    0.95 
   5  -7   0    0.86    0.13 
   5  -7   0    1.79    0.58 
  -5   7   0    1.02    0.45 
   4  -7   0    5.76    0.46 
   4  -7   0    4.93    0.75 
  -4   7   0    5.69    0.77 
   3  -7   0    3.09    0.64 
  -3   7   0    4.18    0.41 
  -3   7   0    3.94    0.66 
  -2   7   0   14.96    1.05 
  -2   7   0   16.00    1.23 
  -2   7   0   15.73    1.26 
  -1   7   0   -0.10    0.34 
  -1   7   0    0.92    0.45 
  -1   7   0   -0.04    0.31 
   0   7   0    4.46    0.71 
   0   7   0    5.69    0.71 
   0   7   0    6.10    0.68 
   1   7   0   11.81    1.07 
   1   7   0   12.20    1.12 
   1   7   0   12.04    1.00 
   2   7   0    7.50    0.90 
   2   7   0    7.96    0.81 
   2   7   0    8.42    0.94 
  -3  -7   0    3.14    0.69 
   3   7   0    2.18    0.69 
   3   7   0    3.62    0.56 
  -4  -7   0    1.55    0.60 
   4   7   0    1.22    0.44 
   4   7   0    0.85    0.57 
  -5  -7   0   -0.31    0.52 
   5   7   0   -0.50    0.50 
   5   7   0   -0.31    0.35 
  -6  -7   0    2.97    0.80 
   6   7   0    1.74    0.78 
   6   7   0    2.20    0.51 
  -7  -7   0   -0.74    0.52 
   7   7   0    1.04    0.75 
  -8  -7   0    1.54    0.73 
   8   7   0    1.00    0.87 
  -9  -7   0    1.48    0.81 
   9   7   0    0.89    0.86 
 -10  -7   0   -0.30    0.68 
  10   7   0    0.77    0.80 
  17  -8   0    0.05    0.87 
 -17   8   0    0.16    0.70 
  16  -8   0   -0.97    0.75 
 -16   8   0   -0.25    0.76 
  15  -8   0    0.51    0.78 
 -15   8   0    1.13    0.77 
  14  -8   0    0.96    0.40 
  14  -8   0    0.47    0.68 
 -14   8   0   -0.22    0.61 
  13  -8   0    1.73    0.79 
  13  -8   0    1.63    0.41 
 -13   8   0    0.65    0.77 
  12  -8   0    3.70    0.88 
  12  -8   0    3.68    0.47 
 -12   8   0    1.88    0.81 
  11  -8   0    1.52    0.32 
  11  -8   0    2.84    0.78 
 -11   8   0    1.28    0.70 
  10  -8   0   15.95    0.98 
  10  -8   0   15.47    1.46 
 -10   8   0   12.57    1.42 
   9  -8   0    4.29    0.83 
   9  -8   0    3.24    0.30 
  -9   8   0    3.60    0.72 
   8  -8   0    4.38    0.77 
  -8   8   0    3.07    0.69 
   7  -8   0    1.10    0.58 
  -7   8   0   -0.29    0.47 
   6  -8   0    9.62    1.03 
  -6   8   0    9.71    1.08 
   5  -8   0    3.55    0.32 
   5  -8   0    2.30    0.67 
  -5   8   0    4.12    0.70 
   4  -8   0    4.83    0.44 
   4  -8   0    3.63    0.71 
  -4   8   0    4.01    0.66 
  -3   8   0   14.53    1.26 
  -3   8   0   16.31    1.05 
  -2   8   0    2.42    0.59 
  -2   8   0    3.23    0.46 
  -2   8   0    2.82    0.66 
  -1   8   0    8.82    0.91 
  -1   8   0    9.23    1.02 
  -1   8   0    8.06    0.80 
   0   8   0   10.60    0.94 
   0   8   0    9.70    1.05 
   0   8   0    9.79    0.96 
   1   8   0    3.82    0.74 
   1   8   0    4.33    0.64 
   1   8   0    2.28    0.60 
   2   8   0    4.86    0.82 
   2   8   0    5.92    0.72 
  -3  -8   0    4.89    0.83 
   3   8   0    5.23    0.92 
   3   8   0    4.23    0.67 
  -4  -8   0    0.96    0.58 
   4   8   0    0.09    0.53 
   4   8   0   -0.21    0.38 
  -5  -8   0    1.59    0.68 
   5   8   0    0.82    0.44 
   5   8   0    0.31    0.59 
  -6  -8   0    0.12    0.54 
   6   8   0    0.54    0.51 
   6   8   0    0.91    0.67 
  -7  -8   0    4.15    0.96 
   7   8   0    1.99    0.87 
  -8  -8   0    0.77    0.63 
   8   8   0    1.56    0.89 
  -9  -8   0    1.21    0.77 
   9   8   0    0.47    0.87 
  17  -9   0   -1.73    0.73 
 -17   9   0   -1.18    0.67 
  16  -9   0   -0.77    0.81 
 -16   9   0    0.34    0.86 
  15  -9   0   -0.38    0.75 
 -15   9   0    0.63    0.75 
  14  -9   0    1.07    0.80 
 -14   9   0    0.81    0.75 
  13  -9   0    1.53    0.75 
 -13   9   0    0.80    0.72 
  12  -9   0    1.39    0.77 
 -12   9   0    1.05    0.71 
  11  -9   0   12.34    0.84 
  11  -9   0   15.08    1.51 
 -11   9   0   12.03    1.41 
  10  -9   0   -0.41    0.64 
 -10   9   0    1.23    0.62 
   9  -9   0    2.78    0.78 
  -9   9   0    2.88    0.74 
   8  -9   0    0.29    0.52 
  -8   9   0    0.05    0.45 
   7  -9   0    3.94    0.78 
  -7   9   0    3.25    0.73 
   6  -9   0    4.22    0.79 
  -6   9   0    1.79    0.61 
   5  -9   0    5.92    0.84 
   5  -9   0    5.32    0.47 
  -5   9   0    4.78    0.75 
   4  -9   0    2.30    0.59 
  -4   9   0    1.33    0.53 
   3  -9   0   -0.25    0.49 
  -3   9   0    0.25    0.27 
  -3   9   0   -0.66    0.36 
  -2   9   0    0.81    0.50 
  -2   9   0    0.59    0.45 
  -2   9   0    0.23    0.34 
  -1   9   0   -0.42    0.35 
  -1   9   0   -0.16    0.46 
  -1   9   0   -0.15    0.41 
   0   9   0    0.40    0.46 
   0   9   0    0.17    0.43 
   0   9   0    0.20    0.50 
   1   9   0    5.46    0.84 
   1   9   0    5.47    0.77 
   1   9   0    4.76    0.91 
  -2  -9   0    2.17    0.67 
   2   9   0    3.42    0.76 
   2   9   0    1.74    0.56 
  -3  -9   0    1.16    0.62 
   3   9   0   -0.48    0.53 
   3   9   0    1.13    0.52 
  -4  -9   0    0.89    0.60 
   4   9   0    0.93    0.71 
   4   9   0    0.09    0.45 
  -5  -9   0    0.28    0.58 
   5   9   0    0.41    0.68 
   5   9   0   -0.12    0.41 
  -6  -9   0   -0.30    0.54 
   6   9   0   -1.28    0.62 
  -7  -9   0    0.57    0.69 
   7   9   0    2.51    0.87 
  -8  -9   0    0.06    0.68 
   8   9   0    0.25    0.77 
  17 -10   0   -0.75    0.75 
 -17  10   0    0.63    0.83 
  16 -10   0    0.45    0.84 
 -16  10   0    0.85    0.85 
  15 -10   0    0.19    0.80 
 -15  10   0   -0.64    0.71 
  14 -10   0    1.76    0.83 
 -14  10   0    0.27    0.78 
  13 -10   0    1.60    0.85 
 -13  10   0    2.25    0.81 
  12 -10   0    0.53    0.70 
 -12  10   0    0.04    0.59 
  11 -10   0    1.03    0.77 
 -11  10   0    2.99    0.87 
  10 -10   0    6.01    1.07 
 -10  10   0    6.07    1.07 
   9 -10   0    4.81    0.94 
  -9  10   0    3.91    0.81 
   8 -10   0   -0.14    0.53 
  -8  10   0    0.49    0.57 
   7 -10   0    1.37    0.63 
  -7  10   0    1.80    0.60 
   6 -10   0    3.72    0.33 
   6 -10   0    3.88    0.80 
  -6  10   0    2.83    0.68 
   5 -10   0    0.94    0.60 
   5 -10   0    0.35    0.22 
  -5  10   0   -0.07    0.44 
   4 -10   0    1.16    0.61 
  -4  10   0    1.76    0.35 
  -4  10   0    1.71    0.63 
   3 -10   0    0.74    0.58 
  -3  10   0    0.20    0.33 
  -3  10   0   -0.23    0.44 
  -2  10   0    3.44    0.70 
  -2  10   0    3.35    0.55 
  -2  10   0    3.32    0.74 
  -1  10   0    4.89    0.73 
  -1  10   0    5.45    0.84 
  -1  10   0    5.53    0.96 
   0  10   0    4.36    0.76 
   0  10   0    5.18    0.91 
   0  10   0    4.24    0.73 
   1  10   0   32.89    2.31 
   1  10   0   32.86    2.24 
   1  10   0   34.89    2.42 
  -2 -10   0    3.18    0.80 
   2  10   0    0.96    0.62 
   2  10   0    2.14    0.64 
  -3 -10   0    0.93    0.65 
   3  10   0    1.45    0.65 
   3  10   0    0.68    0.48 
  -4 -10   0   -0.40    0.53 
   4  10   0   -0.51    0.41 
   4  10   0    0.96    0.68 
  -5 -10   0    0.17    0.59 
   5  10   0   -0.07    0.64 
  -6 -10   0    0.44    0.67 
   6  10   0    1.72    0.90 
  -7 -10   0    1.61    0.80 
   7  10   0    0.73    0.93 
  17 -11   0    2.04    1.04 
 -17  11   0    1.09    0.86 
  16 -11   0    1.28    0.86 
 -16  11   0    0.58    0.84 
  15 -11   0    0.93    0.84 
 -15  11   0   -0.37    0.63 
  14 -11   0   -0.21    0.73 
 -14  11   0    0.53    0.70 
  13 -11   0    0.84    0.82 
 -13  11   0    2.30    0.85 
  12 -11   0    0.79    0.82 
 -12  11   0    0.63    0.64 
  11 -11   0    0.01    0.76 
 -11  11   0    0.31    0.63 
  10 -11   0    0.35    0.70 
 -10  11   0    0.15    0.56 
   9 -11   0    5.78    1.01 
  -9  11   0    5.16    0.97 
   8 -11   0   -0.87    0.59 
  -8  11   0   -0.22    0.51 
   7 -11   0    6.70    1.04 
  -7  11   0    5.87    0.94 
   6 -11   0    0.81    0.24 
   6 -11   0    0.07    0.61 
  -6  11   0   -0.30    0.53 
   5 -11   0    4.84    0.52 
   5 -11   0    4.56    0.88 
  -5  11   0    2.72    0.76 
   4 -11   0    0.78    0.63 
  -4  11   0    0.10    0.32 
  -4  11   0    0.31    0.58 
   3 -11   0    4.49    0.85 
  -3  11   0    4.47    0.66 
  -3  11   0    5.45    0.90 
  -2  11   0    0.40    0.45 
  -2  11   0   -0.24    0.59 
  -1  11   0    4.18    0.90 
  -1  11   0    4.49    0.82 
  -1  11   0    6.85    0.85 
   0  11   0   -1.24    0.48 
   0  11   0    0.42    0.54 
   0  11   0    0.31    0.61 
   1  11   0    6.09    1.08 
   1  11   0    5.69    0.88 
   1  11   0    8.93    1.07 
  -2 -11   0    0.05    0.58 
   2  11   0    0.14    0.53 
   2  11   0    1.26    0.69 
  -3 -11   0    0.08    0.53 
   3  11   0    0.01    0.68 
   3  11   0    0.20    0.50 
  -4 -11   0    1.34    0.67 
   4  11   0    0.96    0.71 
  -5 -11   0   -0.09    0.61 
   5  11   0   -0.77    0.70 
  -6 -11   0    0.17    0.60 
   6  11   0    0.42    0.73 
  17 -12   0    1.39    0.97 
 -17  12   0   -0.88    0.74 
  16 -12   0   -0.66    0.81 
 -16  12   0    2.14    0.96 
  15 -12   0    1.95    0.94 
 -15  12   0    0.42    0.77 
  14 -12   0    2.73    0.97 
 -14  12   0    2.71    0.89 
  13 -12   0   -0.13    0.76 
 -13  12   0   -0.03    0.68 
  12 -12   0    0.81    0.85 
 -12  12   0    0.38    0.66 
  11 -12   0    0.72    0.76 
 -11  12   0    0.58    0.70 
  10 -12   0    2.02    0.90 
 -10  12   0    0.47    0.58 
   9 -12   0    0.86    0.75 
  -9  12   0    0.32    0.56 
   8 -12   0    1.46    0.75 
  -8  12   0    3.08    0.85 
   7 -12   0    0.21    0.70 
  -7  12   0   -0.03    0.52 
   6 -12   0    2.78    0.39 
   6 -12   0    3.32    0.91 
  -6  12   0    3.44    0.75 
   5 -12   0    5.74    1.01 
   5 -12   0    6.14    0.63 
  -5  12   0    4.80    0.91 
   4 -12   0    8.74    1.15 
  -4  12   0    6.10    1.02 
  -4  12   0    6.16    0.72 
   3 -12   0    4.34    0.90 
  -3  12   0    3.62    0.64 
  -3  12   0    4.07    0.90 
   2 -12   0    8.51    1.21 
  -2  12   0   11.02    1.40 
  -2  12   0   11.95    1.13 
  -1  12   0    0.84    0.57 
  -1  12   0    1.32    0.70 
   0  12   0    0.74    0.71 
   0  12   0    0.22    0.58 
   0  12   0    0.45    0.60 
   1  12   0    3.66    0.81 
   1  12   0    0.96    0.74 
   1  12   0   -0.13    0.53 
  -2 -12   0   -0.16    0.58 
   2  12   0   -0.72    0.50 
   2  12   0    1.26    0.75 
  -3 -12   0    2.40    0.84 
   3  12   0    1.55    0.64 
   3  12   0    1.34    0.84 
  -4 -12   0    1.67    0.76 
   4  12   0   -0.16    0.77 
  -5 -12   0    0.29    0.67 
   5  12   0    1.70    0.95 
  16 -13   0   -0.07    0.87 
 -16  13   0    1.11    0.96 
  15 -13   0    1.33    0.94 
 -15  13   0    1.35    0.89 
  14 -13   0    0.25    0.82 
 -14  13   0    0.83    0.78 
  13 -13   0   -0.69    0.78 
 -13  13   0    0.91    0.83 
  12 -13   0    0.64    0.88 
 -12  13   0    0.87    0.79 
  11 -13   0   -0.10    0.69 
 -11  13   0    0.02    0.55 
  10 -13   0    2.85    0.88 
 -10  13   0    1.16    0.69 
   9 -13   0    4.35    0.98 
  -9  13   0    3.74    0.96 
   8 -13   0    6.38    1.14 
  -8  13   0    4.58    0.96 
   7 -13   0    0.70    0.76 
  -7  13   0    0.75    0.63 
   6 -13   0    0.20    0.72 
  -6  13   0    0.76    0.62 
   5 -13   0    0.89    0.37 
   5 -13   0    0.06    0.71 
  -5  13   0   -0.01    0.69 
   4 -13   0    0.37    0.70 
  -4  13   0    0.08    0.64 
  -4  13   0    0.39    0.43 
   3 -13   0    3.04    0.84 
  -3  13   0    3.62    0.68 
  -3  13   0    2.97    0.88 
   2 -13   0    0.23    0.67 
  -2  13   0    1.22    0.55 
  -2  13   0    1.00    0.70 
   1 -13   0    2.55    0.77 
  -1  13   0    1.18    0.63 
  -1  13   0    1.16    0.74 
   0 -13   0    1.26    0.65 
   0  13   0   -0.46    0.70 
   0  13   0    0.29    0.58 
  -1 -13   0    0.39    0.60 
  -1 -13   0    0.59    0.64 
   1  13   0    1.05    0.75 
  -2 -13   0    1.88    0.69 
  -2 -13   0    0.71    0.64 
   2  13   0    1.90    0.87 
  -3 -13   0   -0.22    0.59 
  -4 -13   0    1.82    0.81 
   4  13   0    1.80    0.96 
  16 -14   0    1.86    1.05 
 -16  14   0    0.17    0.82 
  15 -14   0   -1.30    0.78 
 -15  14   0   -0.47    0.67 
  14 -14   0    0.37    0.84 
 -14  14   0   -0.17    0.73 
  13 -14   0    0.96    0.94 
 -13  14   0    0.63    0.78 
  12 -14   0    1.36    0.96 
 -12  14   0    0.26    0.64 
  11 -14   0    1.03    0.92 
 -11  14   0    1.06    0.76 
  10 -14   0    2.67    0.90 
 -10  14   0    2.40    0.87 
   9 -14   0    4.00    1.07 
  -9  14   0    3.09    0.82 
   8 -14   0    2.88    0.94 
  -8  14   0    1.39    0.78 
   7 -14   0    0.14    0.78 
  -7  14   0    0.58    0.72 
   6 -14   0    0.22    0.73 
  -6  14   0   -0.35    0.68 
   5 -14   0    1.72    0.50 
   5 -14   0    2.40    0.89 
  -5  14   0    0.82    0.75 
   4 -14   0    0.88    0.72 
  -4  14   0    1.07    0.71 
   3 -14   0    2.31    0.86 
  -3  14   0    3.08    0.92 
  -3  14   0    3.08    0.71 
   2 -14   0    1.77    0.77 
  -2  14   0    1.16    0.80 
  -2  14   0    0.69    0.59 
   1 -14   0    0.55    0.62 
  -1  14   0   -0.83    0.58 
  -1  14   0    0.00    0.70 
   0 -14   0    1.01    0.67 
   0  14   0    2.20    0.76 
   0  14   0   -0.17    0.69 
  -1 -14   0    0.05    0.62 
  -1 -14   0    1.28    0.69 
   1  14   0    0.92    0.76 
  -2 -14   0    3.54    0.95 
   2  14   0    4.57    1.08 
  15 -15   0    0.35    0.90 
 -15  15   0    0.74    0.89 
  14 -15   0   -0.01    0.75 
 -14  15   0   -0.69    0.59 
  13 -15   0   -0.76    0.69 
 -13  15   0    0.13    0.64 
  12 -15   0    1.01    0.92 
 -12  15   0    0.63    0.71 
  11 -15   0   -0.60    0.83 
 -11  15   0    0.32    0.78 
  10 -15   0   -0.16    0.81 
 -10  15   0    1.30    0.80 
   9 -15   0   -0.30    0.80 
  -9  15   0    1.33    0.74 
   8 -15   0   -0.79    0.59 
  -8  15   0   -0.13    0.58 
   7 -15   0    0.98    0.84 
  -7  15   0    1.91    0.75 
   6 -15   0    0.07    0.76 
  -6  15   0    0.86    0.71 
   5 -15   0    0.28    0.72 
  -5  15   0    1.39    0.80 
   4 -15   0   -0.09    0.67 
  -4  15   0    1.15    0.87 
   3 -15   0    3.46    0.89 
  -3  15   0    0.05    0.80 
  -3  15   0    0.99    0.61 
   2 -15   0    0.30    0.69 
  -2  15   0    0.61    0.65 
  -2  15   0    1.38    0.81 
   1 -15   0   -0.40    0.59 
  -1  15   0   -0.93    0.60 
  -1  15   0    0.03    0.80 
   0 -15   0    0.84    0.69 
   0  15   0    1.50    0.79 
   0  15   0    2.66    0.97 
  -1 -15   0   -0.76    0.59 
   1  15   0    0.54    0.76 
  14 -16   0    1.85    1.06 
 -14  16   0    0.48    0.85 
  13 -16   0   -0.42    0.79 
 -13  16   0    1.39    0.93 
  12 -16   0   -1.64    0.77 
 -12  16   0    0.15    0.79 
  11 -16   0    0.08    0.93 
 -11  16   0    0.27    0.68 
  10 -16   0    0.63    0.89 
 -10  16   0   -0.32    0.62 
   9 -16   0   -0.28    0.77 
  -9  16   0    0.02    0.69 
   8 -16   0    3.03    0.96 
  -8  16   0    1.67    0.90 
   7 -16   0   -1.53    0.64 
  -7  16   0   -0.38    0.72 
   6 -16   0    1.31    0.88 
  -6  16   0    0.12    0.65 
   5 -16   0    1.00    0.86 
  -5  16   0    1.37    0.91 
   4 -16   0    0.19    0.74 
  -4  16   0    1.09    0.94 
   3 -16   0    1.63    0.83 
  -3  16   0    0.18    0.83 
   2 -16   0   -0.39    0.69 
  -2  16   0   -0.19    0.62 
  -2  16   0    0.23    0.86 
   1 -16   0    0.41    0.71 
  -1  16   0    1.28    0.80 
  -1  16   0    0.66    0.88 
  13 -17   0   -0.19    0.98 
 -13  17   0   -0.19    0.73 
  12 -17   0    0.40    0.96 
 -12  17   0    0.28    0.73 
  11 -17   0    1.81    1.10 
 -11  17   0    1.82    0.93 
  10 -17   0   -1.00    0.82 
 -10  17   0    0.73    0.83 
   9 -17   0    1.33    0.94 
  -9  17   0   -0.18    0.70 
   8 -17   0    3.69    1.11 
  -8  17   0    2.44    1.00 
   7 -17   0    2.50    1.03 
  -7  17   0    1.88    0.92 
   6 -17   0   -1.14    0.76 
  -6  17   0    1.12    0.95 
   5 -17   0    1.84    0.89 
  -5  17   0    1.39    1.00 
   4 -17   0   -0.82    0.73 
  -4  17   0   -0.82    0.84 
  10 -18   0    1.10    1.02 
 -10  18   0   -0.44    0.74 
   9 -18   0   -0.19    0.92 
  -9  18   0   -0.26    0.85 
   8 -18   0    1.34    0.98 
  -8  18   0    0.89    0.89 
  -6  18  -1   -1.12    0.67 
   6 -18   1    1.25    0.94 
  -7  18  -1    0.65    0.86 
   7 -18   1   -0.57    0.88 
  -8  18  -1    0.40    0.82 
   8 -18   1    0.10    0.89 
  -9  18  -1   -0.66    0.79 
   9 -18   1    0.18    0.96 
 -10  18  -1    0.12    0.72 
  10 -18   1    2.87    1.15 
 -11  18  -1    1.34    0.93 
  11 -18   1    5.00    1.34 
  -3  17  -1   -0.25    0.81 
   3 -17   1    0.10    0.75 
  -4  17  -1   -0.96    0.73 
  -5  17  -1    0.10    0.85 
   5 -17   1   -1.48    0.70 
  -6  17  -1    0.40    0.84 
   6 -17   1    0.95    0.85 
  -7  17  -1    0.21    0.71 
   7 -17   1    0.90    0.91 
  -8  17  -1    0.00    0.72 
   8 -17   1    1.06    0.91 
  -9  17  -1    1.98    0.94 
   9 -17   1    1.61    1.00 
 -10  17  -1    0.22    0.66 
  10 -17   1    0.80    0.88 
 -11  17  -1   -0.07    0.69 
  11 -17   1    0.11    0.96 
 -12  17  -1   -0.11    0.75 
  12 -17   1    0.67    0.95 
 -13  17  -1    0.04    0.73 
  13 -17   1   -0.07    0.81 
  -1  16  -1   -1.15    0.67 
  -1  16  -1   -0.67    0.65 
   1 -16   1    0.02    0.67 
  -2  16  -1   -0.12    0.59 
  -2  16  -1    0.77    0.87 
   2 -16   1   -1.28    0.64 
  -3  16  -1    0.97    0.90 
   3 -16   1    1.50    0.81 
  -4  16  -1    0.65    0.85 
   4 -16   1    1.19    0.78 
  -5  16  -1    1.40    0.80 
   5 -16   1   -0.07    0.73 
  -6  16  -1    1.92    0.79 
   6 -16   1    0.79    0.85 
  -7  16  -1    2.87    0.99 
   7 -16   1    3.22    0.99 
  -8  16  -1    0.30    0.72 
   8 -16   1    0.58    0.76 
  -9  16  -1    2.83    0.89 
   9 -16   1    6.03    1.27 
 -10  16  -1    5.16    1.17 
  10 -16   1    5.67    1.30 
 -11  16  -1    1.81    0.91 
  11 -16   1    1.97    1.05 
 -12  16  -1    1.45    0.89 
  12 -16   1    1.75    1.03 
 -13  16  -1   -0.64    0.75 
  13 -16   1    0.51    0.86 
 -14  16  -1    0.05    0.80 
  14 -16   1    0.47    0.94 
 -15  16  -1    0.89    0.88 
  15 -16   1    0.94    1.02 
   1  15  -1    1.39    0.84 
  -1 -15   1    1.85    0.82 
   0  15  -1    1.79    0.81 
   0  15  -1   -0.87    0.75 
   0 -15   1    0.87    0.72 
  -1  15  -1    1.36    0.72 
  -1  15  -1    0.82    0.88 
   1 -15   1    1.68    0.76 
  -2  15  -1    1.32    0.87 
  -2  15  -1    0.61    0.61 
   2 -15   1    1.55    0.78 
  -3  15  -1   -0.32    0.49 
  -3  15  -1   -0.96    0.67 
   3 -15   1    1.76    0.76 
  -4  15  -1    1.20    0.55 
  -4  15  -1    1.71    0.81 
   4 -15   1    1.60    0.82 
  -5  15  -1    1.50    0.79 
   5 -15   1    2.91    0.89 
  -6  15  -1    2.04    0.87 
   6 -15   1    1.94    0.86 
  -7  15  -1    0.12    0.63 
   7 -15   1   -0.58    0.72 
  -8  15  -1    5.06    1.04 
   8 -15   1    4.55    1.12 
  -9  15  -1   -0.35    0.70 
   9 -15   1   -1.55    0.68 
 -10  15  -1    0.20    0.62 
  10 -15   1    0.46    0.87 
 -11  15  -1   -0.69    0.58 
  11 -15   1    0.29    0.88 
 -12  15  -1    0.36    0.72 
  12 -15   1    0.55    0.91 
 -13  15  -1    0.62    0.72 
  13 -15   1   -0.53    0.85 
 -14  15  -1    0.78    0.70 
  14 -15   1   -0.71    0.84 
 -15  15  -1    1.79    0.95 
  15 -15   1    2.17    1.08 
   3  14  -1    0.03    0.74 
  -3 -14   1    0.82    0.74 
   2  14  -1    0.44    0.74 
  -2 -14   1    0.65    0.73 
   1  14  -1    0.00    0.67 
  -1 -14   1    0.68    0.63 
  -1 -14   1    0.91    0.72 
   0  14  -1    0.63    0.78 
   0  14  -1    0.75    0.66 
   0 -14   1    2.12    0.73 
  -1  14  -1    0.11    0.75 
  -1  14  -1    0.60    0.60 
   1 -14   1    0.06    0.55 
  -2  14  -1    2.71    0.92 
  -2  14  -1    0.65    0.58 
   2 -14   1    1.83    0.77 
  -3  14  -1    6.11    1.11 
  -3  14  -1    8.12    0.93 
   3 -14   1    6.74    1.11 
  -4  14  -1    2.46    0.85 
  -4  14  -1    4.00    0.63 
   4 -14   1    2.16    0.87 
  -5  14  -1    1.02    0.75 
   5 -14   1    1.45    0.66 
   5 -14   1    2.83    0.89 
  -6  14  -1   -0.05    0.59 
   6 -14   1   -0.58    0.69 
  -7  14  -1    0.04    0.64 
   7 -14   1   -0.01    0.75 
  -8  14  -1    0.58    0.65 
   8 -14   1    1.06    0.84 
  -9  14  -1    0.39    0.63 
   9 -14   1    1.66    0.91 
 -10  14  -1    0.33    0.64 
  10 -14   1    1.54    0.83 
 -11  14  -1    0.02    0.67 
  11 -14   1   -0.87    0.79 
 -12  14  -1    0.18    0.63 
  12 -14   1   -0.66    0.82 
 -13  14  -1    1.69    0.88 
  13 -14   1   -0.62    0.86 
 -14  14  -1    1.66    0.90 
  14 -14   1    0.48    0.96 
 -15  14  -1    1.11    0.88 
  15 -14   1    1.24    0.98 
 -16  14  -1   -0.60    0.65 
  16 -14   1    0.03    0.90 
   4  13  -1    0.78    0.83 
  -4 -13   1    0.25    0.69 
   3  13  -1    2.44    0.91 
  -3 -13   1    2.35    0.90 
   2  13  -1    0.21    0.70 
  -2 -13   1   -0.57    0.51 
  -2 -13   1   -0.82    0.49 
   1  13  -1   -0.17    0.64 
   1  13  -1    1.33    0.68 
  -1 -13   1    0.26    0.56 
   0  13  -1   -0.13    0.68 
   0  13  -1    0.83    0.63 
   0 -13   1   -0.36    0.58 
  -1  13  -1    2.78    0.69 
  -1  13  -1    4.60    0.99 
   1 -13   1    3.65    0.81 
  -2  13  -1    0.98    0.78 
  -2  13  -1    1.66    0.58 
   2 -13   1    0.16    0.65 
  -3  13  -1   13.53    1.57 
  -3  13  -1   14.99    1.24 
   3 -13   1   13.57    1.51 
  -4  13  -1    1.10    0.73 
  -4  13  -1    1.03    0.45 
   4 -13   1    0.41    0.68 
  -5  13  -1    0.82    0.70 
   5 -13   1   -0.45    0.58 
  -6  13  -1    0.80    0.68 
   6 -13   1   -0.08    0.71 
  -7  13  -1   -0.08    0.57 
   7 -13   1   -1.03    0.66 
  -8  13  -1    0.45    0.57 
   8 -13   1    1.45    0.74 
  -9  13  -1    5.77    1.13 
   9 -13   1    6.76    1.25 
 -10  13  -1    0.09    0.59 
  10 -13   1   -0.74    0.74 
 -11  13  -1   -0.46    0.49 
  11 -13   1   -1.06    0.74 
 -12  13  -1    1.76    0.73 
  12 -13   1   -0.04    0.84 
 -13  13  -1    1.58    0.84 
  13 -13   1   -1.12    0.76 
 -14  13  -1    0.76    0.71 
  14 -13   1   -1.48    0.73 
 -15  13  -1    0.11    0.76 
  15 -13   1    0.63    0.92 
 -16  13  -1    0.57    0.83 
  16 -13   1    1.14    1.00 
   5  12  -1    1.07    0.85 
  -5 -12   1    0.08    0.64 
   4  12  -1    1.73    0.88 
  -4 -12   1    0.97    0.69 
   3  12  -1    0.87    0.78 
  -3 -12   1    2.26    0.82 
   2  12  -1    1.22    0.72 
  -2 -12   1    0.44    0.55 
  -2 -12   1   -0.59    0.53 
   1  12  -1    0.92    0.65 
   1  12  -1    0.64    0.76 
  -1 -12   1    2.68    0.69 
   0  12  -1    3.15    0.91 
   0  12  -1    3.21    0.76 
   0 -12   1    2.01    0.67 
  -1  12  -1   -0.60    0.66 
  -1  12  -1   -0.26    0.49 
   1 -12   1    0.71    0.60 
  -2  12  -1    8.86    0.98 
  -2  12  -1   10.44    1.32 
   2 -12   1   10.54    1.21 
  -3  12  -1    3.00    0.78 
  -3  12  -1    1.70    0.51 
   3 -12   1    2.76    0.78 
  -4  12  -1    2.09    0.46 
  -4  12  -1    2.63    0.79 
   4 -12   1    1.95    0.76 
  -5  12  -1   -0.82    0.55 
   5 -12   1    1.06    0.74 
  -6  12  -1    3.07    0.80 
   6 -12   1    1.75    0.80 
   6 -12   1    3.15    0.35 
  -7  12  -1    4.36    0.94 
   7 -12   1    3.59    0.90 
  -8  12  -1    1.15    0.70 
   8 -12   1    1.71    0.74 
  -9  12  -1    1.07    0.62 
   9 -12   1   -0.15    0.67 
 -10  12  -1    1.85    0.73 
  10 -12   1    0.70    0.83 
 -11  12  -1    2.28    0.83 
  11 -12   1   -0.10    0.81 
 -12  12  -1    0.88    0.64 
  12 -12   1   -0.14    0.77 
 -13  12  -1    2.77    0.89 
  13 -12   1    1.86    0.90 
 -14  12  -1    0.32    0.78 
  14 -12   1   -0.75    0.75 
 -15  12  -1    1.12    0.81 
  15 -12   1    3.37    1.05 
 -16  12  -1    0.17    0.74 
  16 -12   1    0.41    0.86 
 -17  12  -1    0.99    0.89 
  17 -12   1    0.12    0.92 
   6  11  -1   -0.12    0.77 
  -6 -11   1    0.04    0.59 
   5  11  -1    0.97    0.86 
   4  11  -1    0.05    0.60 
  -4 -11   1    0.04    0.59 
   3  11  -1    1.63    0.59 
   3  11  -1    1.87    0.80 
  -3 -11   1    1.53    0.72 
   2  11  -1   -0.13    0.60 
  -2 -11   1    0.90    0.66 
   1  11  -1    3.47    0.92 
   1  11  -1    5.96    0.93 
   0  11  -1    0.28    0.64 
   0  11  -1   -0.72    0.45 
   0 -11   1   -0.24    0.47 
  -1  11  -1    5.57    1.00 
  -1  11  -1    5.74    0.78 
   1 -11   1    3.88    0.83 
  -2  11  -1    2.89    0.83 
  -2  11  -1    0.59    0.48 
   2 -11   1    0.95    0.60 
  -3  11  -1    6.61    0.71 
  -3  11  -1    7.29    1.03 
   3 -11   1    6.46    0.93 
  -4  11  -1    2.84    0.72 
  -4  11  -1    3.18    0.46 
   4 -11   1    2.94    0.70 
  -5  11  -1    9.57    1.17 
   5 -11   1    9.88    1.20 
   5 -11   1   10.09    0.75 
  -6  11  -1    5.40    0.88 
   6 -11   1    5.36    0.93 
   6 -11   1    4.94    0.41 
  -7  11  -1    0.00    0.51 
   7 -11   1    0.57    0.67 
  -8  11  -1    1.24    0.63 
   8 -11   1    1.51    0.75 
  -9  11  -1    1.60    0.63 
   9 -11   1    0.38    0.69 
 -10  11  -1   -0.10    0.59 
  10 -11   1    1.18    0.68 
 -11  11  -1   -0.62    0.48 
  11 -11   1   -0.61    0.62 
 -12  11  -1    5.85    1.18 
  12 -11   1    6.09    1.14 
 -13  11  -1    0.73    0.68 
  13 -11   1    0.96    0.83 
 -14  11  -1    0.11    0.65 
  14 -11   1    1.68    0.88 
 -15  11  -1    1.08    0.85 
  15 -11   1    1.43    0.88 
 -16  11  -1    0.11    0.70 
  16 -11   1    0.53    0.86 
 -17  11  -1    0.88    0.79 
  17 -11   1    2.70    1.07 
   7  10  -1    2.87    1.00 
  -7 -10   1    1.37    0.76 
   6  10  -1    0.37    0.70 
  -6 -10   1    1.39    0.74 
   5  10  -1    1.82    0.79 
  -5 -10   1    0.03    0.62 
   4  10  -1    2.22    0.73 
   4  10  -1    0.05    0.43 
  -4 -10   1   -0.04    0.57 
   3  10  -1    0.23    0.45 
   3  10  -1    0.15    0.55 
  -3 -10   1    1.15    0.68 
   2  10  -1    4.52    0.73 
   2  10  -1    4.08    0.86 
  -2 -10   1    4.00    0.87 
   1  10  -1    2.16    0.59 
   1  10  -1    1.97    0.60 
   1  10  -1    2.10    0.75 
   0  10  -1    3.58    0.65 
   0  10  -1    2.44    0.66 
   0  10  -1    2.95    0.80 
  -1  10  -1    0.95    0.58 
  -1  10  -1    0.18    0.41 
   1 -10   1   -0.30    0.46 
  -2  10  -1    6.14    0.97 
  -2  10  -1    7.92    0.78 
   2 -10   1    8.18    0.98 
  -3  10  -1    3.56    0.50 
  -3  10  -1    4.00    0.82 
   3 -10   1    3.72    0.72 
  -4  10  -1    4.19    0.47 
  -4  10  -1    4.08    0.77 
   4 -10   1    4.04    0.78 
  -5  10  -1    1.74    0.58 
   5 -10   1    2.22    0.30 
   5 -10   1    2.39    0.71 
  -6  10  -1    5.38    0.84 
   6 -10   1    7.02    0.96 
  -7  10  -1    0.98    0.55 
   7 -10   1    1.70    0.71 
  -8  10  -1    2.76    0.71 
   8 -10   1    3.75    0.86 
  -9  10  -1    0.16    0.58 
   9 -10   1    2.20    0.80 
 -10  10  -1    6.84    1.07 
  10 -10   1    6.72    1.13 
 -11  10  -1   -0.29    0.56 
  11 -10   1    0.79    0.66 
 -12  10  -1    2.67    0.81 
  12 -10   1    3.63    0.93 
 -13  10  -1    0.72    0.68 
  13 -10   1    1.67    0.85 
 -14  10  -1   -0.47    0.70 
  14 -10   1    1.49    0.88 
 -15  10  -1    0.37    0.74 
  15 -10   1   -0.12    0.79 
 -16  10  -1    2.52    1.02 
  16 -10   1    1.24    1.00 
 -17  10  -1    0.14    0.75 
  17 -10   1    0.70    0.93 
   8   9  -1    0.78    0.75 
  -8  -9   1    0.91    0.72 
   7   9  -1   -0.15    0.67 
  -7  -9   1    0.03    0.61 
   6   9  -1    1.70    0.79 
  -6  -9   1    1.98    0.76 
   5   9  -1   -0.07    0.39 
   5   9  -1    0.14    0.59 
  -5  -9   1   -0.44    0.49 
   4   9  -1    3.19    0.79 
   4   9  -1    3.54    0.63 
  -4  -9   1    3.26    0.83 
   3   9  -1    1.90    0.52 
   3   9  -1    1.52    0.61 
  -3  -9   1    1.90    0.71 
   2   9  -1   13.49    1.33 
   2   9  -1   12.41    1.11 
   1   9  -1    7.29    0.97 
   1   9  -1    7.73    0.83 
   1   9  -1    6.02    0.87 
   0   9  -1    1.99    0.51 
   0   9  -1    1.11    0.47 
   0   9  -1    1.24    0.55 
  -1   9  -1   11.82    1.24 
  -1   9  -1   11.12    1.00 
  -2   9  -1   26.94    1.98 
  -2   9  -1   29.37    1.82 
   2  -9   1   30.60    1.99 
  -3   9  -1    9.53    0.74 
  -3   9  -1    8.38    1.00 
   3  -9   1    8.83    0.99 
  -4   9  -1    1.27    0.26 
  -4   9  -1    1.70    0.56 
   4  -9   1    1.23    0.52 
  -5   9  -1    3.79    0.74 
   5  -9   1    3.39    0.71 
   5  -9   1    5.36    0.40 
  -6   9  -1    3.93    0.69 
   6  -9   1    4.18    0.78 
  -7   9  -1    0.72    0.47 
   7  -9   1    0.64    0.58 
  -8   9  -1   -0.05    0.49 
   8  -9   1    0.19    0.54 
  -9   9  -1    6.33    1.03 
   9  -9   1    7.14    1.07 
 -10   9  -1   -0.39    0.53 
  10  -9   1   -0.95    0.58 
 -11   9  -1    3.17    0.80 
  11  -9   1    2.99    0.86 
  11  -9   1    4.31    0.41 
 -12   9  -1    3.27    0.92 
  12  -9   1    4.29    0.99 
 -13   9  -1    0.91    0.70 
  13  -9   1    0.37    0.72 
 -14   9  -1   -0.46    0.64 
  14  -9   1   -0.92    0.74 
 -15   9  -1   -1.32    0.55 
  15  -9   1   -0.19    0.77 
 -16   9  -1    1.70    0.87 
  16  -9   1    0.93    0.87 
 -17   9  -1   -0.01    0.81 
  17  -9   1   -1.00    0.78 
   9   8  -1   -0.66    0.77 
  -9  -8   1   -0.62    0.64 
   8   8  -1   -0.31    0.76 
  -8  -8   1    1.28    0.77 
   7   8  -1    0.48    0.68 
  -7  -8   1   -0.38    0.59 
   6   8  -1   -0.40    0.59 
  -6  -8   1   -0.20    0.58 
   5   8  -1    1.08    0.65 
   5   8  -1    0.46    0.40 
  -5  -8   1    2.10    0.76 
   4   8  -1    0.87    0.43 
   4   8  -1   -1.32    0.52 
  -4  -8   1    0.63    0.57 
   3   8  -1   12.65    1.30 
   3   8  -1   12.17    1.03 
  -3  -8   1   11.52    1.30 
   2   8  -1    2.86    0.68 
   2   8  -1    2.66    0.63 
   2   8  -1    1.82    0.48 
   1   8  -1    0.95    0.51 
   1   8  -1    0.24    0.44 
   1   8  -1    0.54    0.37 
   0   8  -1   -0.15    0.35 
   0   8  -1   -0.79    0.35 
  -1   8  -1    1.75    0.53 
  -1   8  -1    0.22    0.35 
  -1   8  -1    1.29    0.45 
  -2   8  -1    0.20    0.46 
  -2   8  -1    0.80    0.30 
   2  -8   1    0.03    0.44 
  -3   8  -1    0.15    0.24 
  -3   8  -1   -0.05    0.43 
   3  -8   1   -0.14    0.44 
  -4   8  -1    8.27    0.96 
  -4   8  -1   11.07    0.70 
   4  -8   1   10.76    1.07 
  -5   8  -1    0.36    0.42 
   5  -8   1    1.57    0.59 
  -6   8  -1   -0.31    0.39 
   6  -8   1    0.35    0.54 
  -7   8  -1    0.95    0.48 
   7  -8   1    0.77    0.57 
  -8   8  -1    6.35    0.88 
   8  -8   1    5.54    0.85 
  -9   8  -1    4.93    0.87 
   9  -8   1    6.53    0.90 
   9  -8   1    6.86    0.48 
 -10   8  -1    4.01    0.80 
  10  -8   1    4.07    0.42 
  10  -8   1    4.54    0.82 
 -11   8  -1    0.76    0.60 
  11  -8   1    0.56    0.27 
  11  -8   1    0.85    0.67 
 -12   8  -1    3.52    0.90 
  12  -8   1    4.57    0.97 
  12  -8   1    4.01    0.52 
 -13   8  -1    1.32    0.76 
  13  -8   1    1.40    0.38 
  13  -8   1    0.79    0.78 
 -14   8  -1   -0.75    0.53 
  14  -8   1    0.33    0.38 
  14  -8   1    1.12    0.82 
 -15   8  -1    2.03    0.89 
  15  -8   1    2.39    0.97 
 -16   8  -1    0.00    0.64 
  16  -8   1    0.39    0.85 
 -17   8  -1    0.64    0.85 
  17  -8   1   -0.13    0.86 
  10   7  -1   -0.50    0.69 
 -10  -7   1   -0.20    0.71 
   9   7  -1   -0.07    0.76 
  -9  -7   1    1.24    0.81 
   8   7  -1    1.14    0.79 
  -8  -7   1    0.09    0.67 
   7   7  -1    2.24    0.84 
  -7  -7   1    3.25    0.91 
   6   7  -1    0.15    0.32 
   6   7  -1   -0.61    0.52 
  -6  -7   1    0.50    0.61 
   5   7  -1    0.61    0.37 
   5   7  -1    0.23    0.54 
  -5  -7   1    0.49    0.58 
   4   7  -1    3.94    0.56 
   4   7  -1    4.37    0.80 
  -4  -7   1    3.50    0.75 
   3   7  -1    9.85    1.06 
   3   7  -1   10.04    0.87 
  -3  -7   1   11.44    1.22 
   2   7  -1   13.70    1.14 
   2   7  -1   12.90    1.03 
   2   7  -1   13.15    1.29 
   1   7  -1    0.11    0.42 
   1   7  -1    0.61    0.38 
   1   7  -1    0.52    0.51 
   0   7  -1   12.15    0.97 
   0   7  -1   11.50    0.97 
   0   7  -1   12.53    1.06 
  -1   7  -1    3.68    0.55 
  -1   7  -1    4.43    0.67 
  -1   7  -1    3.91    0.51 
  -2   7  -1   -0.04    0.42 
  -2   7  -1    0.95    0.28 
   2  -7   1    0.92    0.47 
  -3   7  -1    9.21    0.88 
  -3   7  -1    9.10    0.65 
   3  -7   1   10.08    0.96 
  -4   7  -1    6.70    0.80 
   4  -7   1    8.68    0.87 
  -5   7  -1    8.19    0.93 
   5  -7   1   10.96    0.99 
  -6   7  -1    4.25    0.67 
   6  -7   1    4.40    0.77 
  -7   7  -1   18.38    1.45 
   7  -7   1   19.24    1.52 
  -8   7  -1  106.01    6.07 
   8  -7   1  104.24    5.69 
   8  -7   1  104.43    6.02 
  -9   7  -1    3.30    0.78 
   9  -7   1    2.47    0.33 
   9  -7   1    2.73    0.72 
 -10   7  -1    5.58    0.92 
  10  -7   1    4.63    0.84 
  10  -7   1    5.32    0.54 
 -11   7  -1    0.77    0.66 
  11  -7   1    0.95    0.33 
  11  -7   1   -0.28    0.62 
 -12   7  -1    0.05    0.54 
  12  -7   1    0.84    0.70 
  12  -7   1    0.30    0.35 
 -13   7  -1    0.42    0.69 
  13  -7   1    0.44    0.39 
  13  -7   1   -0.02    0.65 
 -14   7  -1    2.75    0.88 
  14  -7   1    1.54    0.84 
  14  -7   1    2.64    0.58 
 -15   7  -1    0.25    0.72 
  15  -7   1   -0.80    0.73 
  15  -7   1   -0.28    0.43 
 -16   7  -1    1.79    0.88 
  16  -7   1    1.77    0.89 
  16  -7   1    2.84    0.78 
 -17   7  -1    1.01    0.87 
  17  -7   1   -0.20    0.77 
  11   6  -1   -1.09    0.76 
 -11  -6   1   -0.07    0.73 
  10   6  -1    0.33    0.80 
 -10  -6   1   -0.03    0.72 
   9   6  -1    0.18    0.66 
  -9  -6   1    0.04    0.63 
   8   6  -1    2.15    0.74 
  -8  -6   1   -0.13    0.64 
   7   6  -1    0.23    0.30 
   7   6  -1   -0.41    0.61 
  -7  -6   1   -0.01    0.59 
   6   6  -1    2.68    0.45 
   6   6  -1    1.42    0.64 
  -6  -6   1    2.21    0.74 
   5   6  -1    0.79    0.31 
   5   6  -1    0.74    0.54 
  -5  -6   1   -0.16    0.43 
   4   6  -1    1.81    0.56 
   4   6  -1    1.93    0.39 
  -4  -6   1    0.98    0.57 
   3   6  -1    0.53    0.29 
   3   6  -1   -0.22    0.37 
  -3  -6   1    0.09    0.45 
   2   6  -1    0.00    0.27 
   2   6  -1    0.29    0.36 
   2   6  -1   -0.19    0.36 
   1   6  -1    4.36    0.56 
   1   6  -1    5.25    0.74 
   1   6  -1    5.37    0.64 
   0   6  -1   33.33    2.04 
   0   6  -1   35.01    2.05 
   0   6  -1   32.48    2.12 
  -1   6  -1    2.20    0.47 
  -1   6  -1    2.61    0.39 
  -2   6  -1    1.69    0.29 
  -2   6  -1    2.51    0.51 
   2  -6   1    2.20    0.49 
  -3   6  -1    2.70    0.27 
  -3   6  -1    3.27    0.51 
   3  -6   1    2.39    0.51 
  -4   6  -1   22.98    1.60 
   4  -6   1   24.25    1.60 
  -5   6  -1   25.39    1.71 
   5  -6   1   24.15    1.67 
  -6   6  -1   -0.47    0.34 
  -6   6  -1    0.01    0.11 
   6  -6   1   -0.42    0.48 
  -7   6  -1   -0.12    0.46 
   7  -6   1    0.39    0.18 
   7  -6   1    0.11    0.43 
  -8   6  -1    9.89    1.09 
   8  -6   1    6.53    0.89 
   8  -6   1    8.51    0.64 
  -9   6  -1   14.61    1.44 
   9  -6   1   14.54    1.30 
   9  -6   1   14.55    1.01 
 -10   6  -1   -0.03    0.52 
  10  -6   1    0.43    0.56 
  10  -6   1    0.61    0.30 
 -11   6  -1    0.23    0.55 
  11  -6   1   -0.32    0.57 
  11  -6   1    0.07    0.34 
 -12   6  -1    0.12    0.63 
  12  -6   1   -0.04    0.60 
  12  -6   1   -0.20    0.35 
 -13   6  -1    0.05    0.58 
  13  -6   1   -0.31    0.62 
  13  -6   1    0.07    0.38 
 -14   6  -1    0.26    0.71 
  14  -6   1    1.05    0.49 
  14  -6   1    1.13    0.75 
 -15   6  -1    0.19    0.61 
  15  -6   1    0.84    0.57 
  15  -6   1   -0.75    0.63 
 -16   6  -1   -0.04    0.72 
  16  -6   1    0.20    0.56 
  16  -6   1   -0.37    0.72 
  12   5  -1    1.41    1.00 
 -12  -5   1    0.13    0.79 
  11   5  -1   -0.01    0.79 
 -11  -5   1   -0.58    0.68 
  10   5  -1    0.33    0.77 
 -10  -5   1    1.85    0.83 
   9   5  -1    2.24    0.86 
  -9  -5   1    1.66    0.80 
   8   5  -1    0.01    0.67 
  -8  -5   1    1.32    0.73 
   7   5  -1    4.43    0.87 
   7   5  -1    6.33    0.64 
  -7  -5   1    5.40    0.97 
   6   5  -1    0.92    0.33 
   6   5  -1    0.51    0.51 
  -6  -5   1    0.52    0.56 
   5   5  -1    1.74    0.60 
   5   5  -1    2.82    0.41 
  -5  -5   1    1.98    0.63 
   4   5  -1   -0.33    0.38 
   4   5  -1   -0.08    0.24 
  -4  -5   1   -0.26    0.37 
   3   5  -1    0.29    0.41 
   3   5  -1    0.60    0.27 
  -3  -5   1    0.93    0.49 
   2   5  -1   19.24    1.24 
   2   5  -1   19.45    1.40 
   1   5  -1   28.67    1.79 
   1   5  -1   28.12    1.73 
   1   5  -1   29.15    1.85 
   0   5  -1   23.59    1.57 
   0   5  -1   22.92    1.49 
   0   5  -1   23.49    1.47 
  -1   5  -1    8.31    0.64 
  -1   5  -1    9.04    0.78 
   1  -5   1    9.02    0.81 
  -2   5  -1   15.60    0.90 
  -2   5  -1   13.85    1.05 
   2  -5   1   14.08    1.07 
  -3   5  -1    0.60    0.33 
  -3   5  -1    0.69    0.11 
   3  -5   1    0.86    0.40 
   3  -5   1    0.65    0.12 
  -4   5  -1   22.32    1.49 
   4  -5   1   22.75    1.53 
  -5   5  -1   13.36    0.76 
  -5   5  -1   12.52    1.03 
   5  -5   1   12.66    0.75 
   5  -5   1   12.54    1.10 
  -6   5  -1   56.42    3.30 
   6  -5   1   54.73    3.27 
   6  -5   1   54.95    3.05 
  -7   5  -1    0.46    0.42 
   7  -5   1   -0.31    0.49 
   7  -5   1    0.05    0.22 
  -8   5  -1    0.89    0.47 
   8  -5   1    0.88    0.29 
   8  -5   1    1.85    0.53 
  -9   5  -1   -0.25    0.40 
   9  -5   1    0.10    0.28 
   9  -5   1   -0.05    0.45 
 -10   5  -1    0.14    0.57 
  10  -5   1   -0.40    0.49 
  10  -5   1    0.56    0.36 
 -11   5  -1   -0.08    0.50 
  11  -5   1   -0.19    0.57 
  11  -5   1    0.43    0.38 
 -12   5  -1    1.43    0.73 
  12  -5   1    0.34    0.46 
  12  -5   1    0.44    0.60 
 -13   5  -1    0.71    0.76 
  13  -5   1    2.73    0.79 
  13  -5   1    1.89    0.59 
 -14   5  -1    2.33    0.83 
  14  -5   1    0.66    0.69 
  14  -5   1    2.05    0.65 
 -15   5  -1    0.19    0.69 
  15  -5   1    0.25    0.57 
  15  -5   1   -0.44    0.62 
 -16   5  -1   -0.81    0.60 
  16  -5   1    0.39    0.63 
  16  -5   1    0.55    0.83 
  12   4  -1    0.20    0.68 
 -12  -4   1    0.06    0.79 
  11   4  -1    1.17    0.83 
 -11  -4   1    1.09    0.78 
  10   4  -1    3.17    0.92 
 -10  -4   1    2.11    0.85 
   9   4  -1    1.88    0.73 
  -9  -4   1    1.37    0.73 
   8   4  -1    0.42    0.58 
   8   4  -1    1.14    0.36 
  -8  -4   1    0.52    0.59 
   7   4  -1    0.13    0.52 
   7   4  -1    0.54    0.30 
  -7  -4   1    0.74    0.64 
   6   4  -1    6.82    0.59 
   6   4  -1    4.93    0.81 
  -6  -4   1    5.68    0.89 
   5   4  -1   -0.03    0.42 
   5   4  -1    0.64    0.26 
  -5  -4   1    0.66    0.49 
   4   4  -1    2.06    0.55 
   4   4  -1    0.76    0.27 
  -4  -4   1    0.60    0.45 
   3   4  -1    2.76    0.52 
   3   4  -1    3.40    0.38 
  -3  -4   1    2.64    0.62 
   2   4  -1    5.43    0.50 
   2   4  -1    4.96    0.59 
  -2  -4   1    7.88    0.81 
   1   4  -1   18.77    1.14 
   1   4  -1   17.04    1.19 
   1   4  -1   19.10    1.27 
   0   4  -1    8.69    0.64 
   0   4  -1    8.28    0.65 
   0   4  -1    7.52    0.70 
  -1   4  -1   31.06    1.75 
  -1   4  -1   30.42    1.85 
   1  -4   1   30.62    1.83 
  -2   4  -1   22.41    1.39 
  -2   4  -1   22.27    1.24 
   2  -4   1   21.47    1.41 
  -3   4  -1    5.37    0.57 
   3  -4   1    4.40    0.57 
  -4   4  -1 1000.00   51.17 
  -4   4  -1  922.43   51.32 
   4  -4   1  961.24   51.32 
   4  -4   1  942.90   51.23 
  -5   4  -1   32.00    1.95 
   5  -4   1   29.38    1.93 
   5  -4   1   30.98    1.75 
  -6   4  -1    8.81    0.93 
   6  -4   1    9.20    0.89 
   6  -4   1    8.51    0.66 
  -7   4  -1    0.39    0.42 
   7  -4   1    0.06    0.27 
   7  -4   1   -0.04    0.44 
  -8   4  -1    4.30    0.72 
   8  -4   1    4.51    0.55 
   8  -4   1    4.58    0.68 
  -9   4  -1    7.43    0.95 
   9  -4   1    7.35    0.90 
   9  -4   1    6.17    0.71 
 -10   4  -1    1.25    0.63 
  10  -4   1    0.09    0.39 
  10  -4   1    0.43    0.55 
 -11   4  -1    1.62    0.71 
  11  -4   1    0.89    0.48 
  11  -4   1    1.21    0.63 
 -12   4  -1   -0.48    0.64 
  12  -4   1    0.20    0.46 
  12  -4   1    0.38    0.55 
 -13   4  -1   -0.87    0.57 
  13  -4   1    0.06    0.56 
  13  -4   1    0.65    0.57 
 -14   4  -1    0.44    0.76 
  14  -4   1    0.17    0.57 
  14  -4   1    2.05    0.72 
 -15   4  -1    1.26    0.85 
  15  -4   1    0.30    0.66 
  15  -4   1    0.88    0.66 
 -16   4  -1    1.20    0.85 
  16  -4   1   -0.23    0.62 
  13   3  -1    1.48    0.88 
 -13  -3   1    0.89    0.80 
  12   3  -1   -0.37    0.61 
 -12  -3   1   -1.10    0.61 
  11   3  -1    1.66    0.83 
 -11  -3   1    1.86    0.81 
  10   3  -1    4.33    0.96 
 -10  -3   1    3.41    0.90 
   9   3  -1   -0.07    0.53 
   9   3  -1   -0.12    0.30 
  -9  -3   1    0.51    0.67 
   8   3  -1    0.13    0.59 
   8   3  -1    0.51    0.31 
  -8  -3   1    0.30    0.62 
   7   3  -1    6.81    0.63 
   7   3  -1    7.23    0.98 
  -7  -3   1    6.95    0.99 
   6   3  -1    5.54    0.54 
   6   3  -1    5.23    0.76 
  -6  -3   1    5.75    0.90 
   5   3  -1   -0.41    0.41 
   5   3  -1    0.14    0.22 
  -5  -3   1   -0.08    0.45 
   4   3  -1    0.66    0.40 
   4   3  -1    0.75    0.23 
  -4  -3   1    0.13    0.44 
   3   3  -1    0.19    0.33 
   3   3  -1    0.95    0.22 
  -3  -3   1    0.07    0.39 
   2   3  -1    6.55    0.49 
   2   3  -1    5.82    0.60 
  -2  -3   1    6.66    0.67 
   1   3  -1   11.00    0.81 
   1   3  -1   11.76    0.76 
   1   3  -1   12.69    0.89 
   0   3  -1   24.93    1.54 
   0   3  -1   25.81    1.48 
   0   3  -1   26.02    1.49 
  -1   3  -1   16.60    1.06 
  -1   3  -1   16.90    0.96 
   1  -3   1   16.52    1.03 
  -2   3  -1  226.64   12.12 
   2  -3   1  221.71   12.10 
  -3   3  -1   41.76    2.28 
  -3   3  -1   41.87    2.42 
   3  -3   1   42.63    2.28 
   3  -3   1   40.88    2.44 
  -4   3  -1  481.50   25.57 
   4  -3   1  469.60   25.45 
   4  -3   1  474.06   25.55 
  -5   3  -1   16.80    1.20 
   5  -3   1   16.39    1.19 
   5  -3   1   17.21    1.06 
  -6   3  -1    6.24    0.75 
   6  -3   1    8.06    0.66 
   6  -3   1    7.22    0.76 
  -7   3  -1    6.22    0.80 
   7  -3   1    6.49    0.65 
   7  -3   1    7.31    0.79 
  -8   3  -1    0.63    0.49 
   8  -3   1   -0.42    0.28 
   8  -3   1    0.14    0.42 
  -9   3  -1   12.56    1.31 
   9  -3   1   13.22    1.09 
   9  -3   1   12.39    1.12 
 -10   3  -1    0.35    0.54 
  10  -3   1    0.46    0.45 
  10  -3   1    0.31    0.46 
 -11   3  -1   -0.59    0.44 
  11  -3   1   -0.35    0.48 
  11  -3   1   -0.11    0.41 
 -12   3  -1    0.32    0.56 
  12  -3   1    0.12    0.53 
  12  -3   1    0.05    0.54 
 -13   3  -1    0.57    0.67 
  13  -3   1    0.00    0.53 
  13  -3   1   -0.68    0.52 
 -14   3  -1    0.02    0.68 
  14  -3   1    0.44    0.60 
  14  -3   1   -0.32    0.56 
 -15   3  -1   -0.58    0.72 
  15  -3   1    0.34    0.68 
 -16   3  -1   -0.84    0.74 
  16  -3   1   -0.50    0.65 
  14   2  -1   -0.33    0.75 
 -14  -2   1    1.20    0.91 
  13   2  -1    1.38    0.80 
 -13  -2   1    0.00    0.72 
  12   2  -1    0.30    0.80 
 -12  -2   1    1.89    0.86 
  11   2  -1   -0.76    0.54 
 -11  -2   1    0.65    0.72 
  10   2  -1    2.01    0.75 
  10   2  -1    1.90    0.45 
 -10  -2   1    2.00    0.78 
   9   2  -1   -0.36    0.51 
   9   2  -1   -0.01    0.30 
  -9  -2   1    0.52    0.65 
   8   2  -1    1.58    0.37 
   8   2  -1    0.81    0.54 
  -8  -2   1    0.73    0.63 
   7   2  -1    1.66    0.60 
   7   2  -1    1.46    0.33 
  -7  -2   1    1.51    0.57 
   6   2  -1    8.51    0.64 
   6   2  -1    5.76    0.81 
  -6  -2   1    9.02    0.99 
   5   2  -1    0.34    0.36 
   5   2  -1    0.14    0.21 
  -5  -2   1    0.34    0.42 
   4   2  -1    0.28    0.18 
   4   2  -1    0.23    0.37 
  -4  -2   1    0.72    0.40 
   3   2  -1    1.10    0.34 
   3   2  -1    1.82    0.23 
  -3  -2   1    1.84    0.46 
   2   2  -1    3.12    0.29 
   2   2  -1    2.50    0.38 
  -2  -2   1    3.54    0.48 
   1   2  -1    6.79    0.46 
   1   2  -1    6.39    0.53 
   1   2  -1    7.59    0.60 
  -1  -2   1    7.19    0.51 
   0   2  -1    1.51    0.21 
   0   2  -1    1.60    0.27 
   0  -2   1    1.52    0.21 
  -1   2  -1    1.02    0.12 
  -1   2  -1    0.90    0.19 
   1  -2   1    0.94    0.21 
   1  -2   1    0.67    0.11 
  -2   2  -1  124.37    6.72 
  -2   2  -1  122.80    6.65 
   2  -2   1  123.47    6.65 
   2  -2   1  121.01    6.72 
  -3   2  -1   52.97    3.02 
   3  -2   1   54.06    2.93 
   3  -2   1   52.42    3.01 
  -4   2  -1    0.96    0.33 
   4  -2   1    0.50    0.24 
   4  -2   1    1.12    0.36 
  -5   2  -1   14.57    1.07 
   5  -2   1   13.76    0.99 
   5  -2   1   13.92    1.07 
  -6   2  -1    6.23    0.73 
   6  -2   1    6.77    0.71 
   6  -2   1    6.37    0.65 
  -7   2  -1    2.77    0.61 
   7  -2   1    2.22    0.51 
   7  -2   1    3.06    0.50 
  -8   2  -1    0.80    0.43 
   8  -2   1    0.29    0.38 
   8  -2   1    0.70    0.42 
  -9   2  -1    1.37    0.61 
   9  -2   1    2.03    0.50 
   9  -2   1    1.52    0.50 
 -10   2  -1   15.16    1.53 
  10  -2   1   15.99    1.34 
  10  -2   1   12.46    1.19 
 -11   2  -1    0.06    0.52 
  11  -2   1    0.49    0.53 
  11  -2   1    0.47    0.45 
 -12   2  -1   -0.65    0.46 
  12  -2   1    0.09    0.51 
  12  -2   1    0.41    0.53 
 -13   2  -1    1.49    0.74 
  13  -2   1    1.24    0.60 
  13  -2   1    0.79    0.68 
 -14   2  -1    1.54    0.82 
  14  -2   1    0.12    0.64 
 -15   2  -1   -0.31    0.68 
  15  -2   1   -0.30    0.68 
  14   1  -1    1.36    0.90 
 -14  -1   1    0.39    0.84 
  13   1  -1    0.99    0.76 
 -13  -1   1    0.02    0.73 
  12   1  -1    1.88    0.75 
 -12  -1   1    2.63    0.85 
  11   1  -1   -0.30    0.60 
 -11  -1   1   -0.22    0.54 
  10   1  -1    0.59    0.61 
  10   1  -1    0.25    0.35 
 -10  -1   1    0.10    0.56 
   9   1  -1    0.61    0.59 
   9   1  -1    0.91    0.34 
  -9  -1   1    0.35    0.53 
   8   1  -1    2.39    0.60 
   8   1  -1    1.39    0.37 
  -8  -1   1    1.27    0.60 
   7   1  -1   18.48    1.22 
   7   1  -1   19.95    1.48 
  -7  -1   1   19.00    1.53 
   6   1  -1    3.10    0.59 
   6   1  -1    3.92    0.43 
  -6  -1   1    3.36    0.68 
   5   1  -1    0.66    0.40 
   5   1  -1    0.90    0.26 
  -5  -1   1    1.10    0.43 
   4   1  -1    1.01    0.22 
   4   1  -1    0.33    0.30 
  -4  -1   1    0.78    0.37 
   3   1  -1    2.88    0.25 
   3   1  -1    1.81    0.35 
  -3  -1   1    1.61    0.39 
   2   1  -1   19.47    1.08 
   2   1  -1   20.55    1.20 
  -2  -1   1   19.56    1.08 
  -2  -1   1   18.25    1.20 
   1   1  -1   -0.03    0.15 
  -1  -1   1    0.11    0.16 
  -1   1  -1    0.09    0.07 
  -1   1  -1   -0.02    0.08 
   1  -1   1   -0.03    0.10 
   1  -1   1   -0.03    0.07 
  -2   1  -1   81.86    4.54 
   2  -1   1   84.47    4.55 
   2  -1   1   83.36    4.52 
  -3   1  -1   25.51    1.65 
   3  -1   1   29.13    1.61 
   3  -1   1   27.88    1.64 
  -4   1  -1   59.96    3.41 
   4  -1   1   60.63    3.38 
   4  -1   1   59.35    3.37 
  -5   1  -1    2.13    0.46 
   5  -1   1    3.17    0.46 
   5  -1   1    2.24    0.41 
  -6   1  -1   11.76    1.00 
   6  -1   1   10.99    0.92 
   6  -1   1   11.15    0.91 
  -7   1  -1    2.23    0.56 
   7  -1   1    1.86    0.48 
   7  -1   1    1.38    0.41 
  -8   1  -1    0.18    0.47 
   8  -1   1    0.04    0.38 
   8  -1   1    0.33    0.37 
  -9   1  -1    5.15    0.85 
   9  -1   1    4.39    0.66 
   9  -1   1    3.60    0.67 
 -10   1  -1   11.40    1.35 
  10  -1   1   11.52    1.25 
  10  -1   1   10.47    1.03 
 -11   1  -1    7.17    1.14 
  11  -1   1    8.81    0.95 
  11  -1   1    8.79    1.08 
 -12   1  -1    1.04    0.72 
  12  -1   1    1.79    0.72 
  12  -1   1    0.66    0.51 
 -13   1  -1    1.73    0.85 
  13  -1   1   -0.68    0.61 
  13  -1   1    0.01    0.69 
 -14   1  -1    0.64    0.76 
  14  -1   1    0.20    0.71 
 -15   1  -1    1.74    0.87 
  15  -1   1    0.05    0.78 
  15   0  -1    0.79    0.85 
 -15   0   1    1.22    0.94 
  14   0  -1    0.40    0.81 
 -14   0   1    2.66    0.97 
  13   0  -1    6.26    1.09 
 -13   0   1    2.13    0.94 
 -12   0   1    0.51    0.74 
  11   0  -1    0.75    0.42 
  11   0  -1    0.42    0.59 
 -11   0   1    0.94    0.64 
  10   0  -1    1.28    0.42 
  10   0  -1    0.95    0.58 
 -10   0   1    0.94    0.59 
   9   0  -1   -0.33    0.31 
   9   0  -1    1.02    0.54 
  -9   0   1    0.65    0.60 
   8   0  -1    2.41    0.41 
   8   0  -1    0.88    0.50 
  -8   0   1    2.17    0.68 
   7   0  -1   26.73    1.78 
   7   0  -1   24.80    1.58 
  -7   0   1   26.73    1.86 
   6   0  -1    5.08    0.51 
   6   0  -1    5.61    0.66 
  -6   0   1    4.76    0.73 
   5   0  -1    0.63    0.34 
   5   0  -1   -0.03    0.23 
  -5   0   1   -0.40    0.34 
   4   0  -1    5.48    0.47 
   4   0  -1    5.09    0.52 
   3   0  -1   14.75    0.87 
   3   0  -1   14.62    0.94 
  -3   0   1   12.90    0.99 
   2   0  -1    9.77    0.57 
   2   0  -1    8.52    0.62 
  -2   0   1    8.63    0.66 
  -2   0   1   10.01    0.58 
   0   0  -1   -0.06    0.04 
   0   0  -1   -0.01    0.01 
   0   0   1    0.01    0.01 
   0   0   1    0.01    0.04 
  -1   0  -1   25.00    1.45 
   1   0   1   26.51    1.48 
   1   0   1   25.59    1.45 
   1   0   1   27.70    1.48 
  -2   0  -1  171.60    9.43 
   2   0   1  178.75    9.45 
   2   0   1  174.03    9.44 
  -3   0  -1    2.99    0.42 
   3   0   1    1.80    0.34 
   3   0   1    3.18    0.37 
  -4   0  -1    3.34    0.50 
   4   0   1    2.52    0.44 
   4   0   1    2.36    0.39 
  -5   0  -1   -0.20    0.37 
   5   0   1   -0.09    0.28 
   5   0   1   -0.27    0.34 
  -6   0  -1    2.32    0.55 
   6   0   1    1.88    0.43 
   6   0   1    2.01    0.48 
  -7   0  -1    1.68    0.57 
   7   0   1    2.48    0.59 
   7   0   1    3.23    0.50 
  -8   0  -1   12.79    1.26 
   8   0   1   12.40    1.02 
   8   0   1   10.79    1.16 
  -9   0  -1    1.66    0.61 
   9   0   1    0.35    0.57 
   9   0   1    1.19    0.46 
 -10   0  -1   -0.02    0.50 
  10   0   1    0.28    0.43 
  10   0   1    1.27    0.63 
 -11   0  -1    0.13    0.63 
  11   0   1   -0.63    0.58 
  11   0   1    0.00    0.40 
 -12   0  -1    1.21    0.75 
  12   0   1    0.01    0.57 
  12   0   1   -0.26    0.42 
 -13   0  -1    0.27    0.71 
  13   0   1    1.16    0.71 
 -14   0  -1   -0.56    0.72 
  14   0   1    1.27    0.79 
  15  -1  -1   -1.46    0.64 
 -15   1   1   -0.04    0.81 
  14  -1  -1    4.25    0.97 
 -14   1   1    0.97    0.82 
  13  -1  -1    0.08    0.63 
 -13   1   1   -0.44    0.67 
  12  -1  -1    2.89    0.79 
  12  -1  -1    1.79    0.53 
 -12   1   1    1.56    0.79 
  11  -1  -1    0.38    0.60 
  11  -1  -1    0.78    0.42 
 -11   1   1    0.59    0.60 
  10  -1  -1    2.07    0.49 
  10  -1  -1    2.29    0.65 
 -10   1   1    2.48    0.77 
   9  -1  -1    1.66    0.55 
   9  -1  -1    1.40    0.39 
  -9   1   1    1.16    0.56 
   8  -1  -1   25.28    1.58 
   8  -1  -1   23.45    1.66 
  -8   1   1   23.79    1.75 
   7  -1  -1    7.42    0.68 
   7  -1  -1    7.15    0.76 
  -7   1   1    4.61    0.78 
   6  -1  -1   26.69    1.66 
   6  -1  -1   26.26    1.59 
  -6   1   1   24.78    1.75 
   5  -1  -1    6.65    0.63 
   5  -1  -1    8.25    0.70 
  -5   1   1    8.29    0.81 
   4  -1  -1    0.57    0.28 
   4  -1  -1    0.83    0.27 
   3  -1  -1   71.54    3.90 
   3  -1  -1   72.39    3.90 
  -3   1   1   69.22    3.97 
   2  -1  -1   36.95    1.99 
  -2   1   1   34.10    2.03 
  -2   1   1   37.01    2.02 
   1  -1  -1    0.03    0.08 
  -1   1   1    0.25    0.12 
  -1   1   1    0.05    0.12 
   0  -1  -1    0.36    0.11 
   0   1   1    0.35    0.14 
   0   1   1    0.10    0.11 
   0   1   1    0.40    0.16 
  -1  -1  -1   52.96    3.23 
   1   1   1   62.70    3.26 
   1   1   1   61.10    3.24 
  -2  -1  -1   15.88    1.01 
   2   1   1   15.53    0.97 
   2   1   1   14.76    1.04 
  -3  -1  -1   30.13    1.80 
   3   1   1   29.18    1.81 
   3   1   1   30.10    1.76 
  -4  -1  -1    8.93    0.80 
   4   1   1    9.33    0.71 
   4   1   1    6.78    0.75 
  -5  -1  -1    2.85    0.54 
   5   1   1    1.34    0.36 
   5   1   1    0.77    0.42 
  -6  -1  -1    0.23    0.41 
   6   1   1    0.94    0.34 
   6   1   1    0.93    0.44 
  -7  -1  -1    0.54    0.49 
   7   1   1    0.21    0.32 
   7   1   1    0.01    0.42 
  -8  -1  -1    0.36    0.52 
   8   1   1    0.31    0.38 
   8   1   1    0.82    0.50 
  -9  -1  -1   -0.62    0.52 
   9   1   1    0.31    0.55 
   9   1   1   -0.52    0.37 
 -10  -1  -1    0.85    0.66 
  10   1   1    0.56    0.68 
  10   1   1    0.94    0.46 
 -11  -1  -1    1.66    0.76 
  11   1   1    0.86    0.49 
  11   1   1    1.70    0.73 
 -12  -1  -1   -0.15    0.65 
  12   1   1    1.14    0.80 
 -13  -1  -1   -0.86    0.67 
  13   1   1   -0.47    0.73 
 -14  -1  -1    0.26    0.76 
  14   1   1    1.24    0.88 
  16  -2  -1    1.16    0.79 
 -16   2   1    0.16    0.84 
  15  -2  -1    0.75    0.63 
 -15   2   1   -0.01    0.75 
  14  -2  -1    0.16    0.58 
 -14   2   1    0.52    0.76 
  13  -2  -1    0.21    0.46 
  13  -2  -1   -0.29    0.55 
 -13   2   1    0.28    0.68 
  12  -2  -1   -0.82    0.42 
  12  -2  -1   -0.94    0.44 
 -12   2   1   -0.46    0.60 
  11  -2  -1    0.11    0.41 
  11  -2  -1    0.45    0.52 
 -11   2   1    0.49    0.67 
  10  -2  -1    8.50    0.99 
  10  -2  -1    9.96    0.96 
 -10   2   1    8.57    1.13 
   9  -2  -1    1.75    0.47 
   9  -2  -1    2.71    0.53 
  -9   2   1    2.44    0.68 
   8  -2  -1   12.70    1.03 
   8  -2  -1   13.66    1.07 
  -8   2   1   12.81    1.17 
   7  -2  -1   10.06    0.85 
   7  -2  -1    9.85    0.86 
  -7   2   1   10.08    1.07 
   6  -2  -1    5.82    0.61 
   6  -2  -1    5.76    0.59 
  -6   2   1    5.07    0.69 
   5  -2  -1    0.95    0.29 
  -5   2   1    1.99    0.48 
   4  -2  -1   18.31    1.13 
   4  -2  -1   16.49    1.21 
  -4   2   1   20.12    1.24 
   3  -2  -1   34.00    2.05 
   3  -2  -1   37.13    1.98 
  -3   2   1   35.20    2.09 
   2  -2  -1    4.48    0.35 
  -2   2   1    4.79    0.43 
  -2   2   1    4.87    0.45 
   1  -2  -1   44.74    2.56 
  -1   2   1   47.73    2.58 
  -1   2   1   47.36    2.61 
   0   2   1    8.95    0.61 
   0   2   1    8.65    0.60 
   0   2   1    8.70    0.64 
   1   2   1   -0.29    0.22 
   1   2   1   -0.10    0.23 
   1   2   1    0.16    0.23 
  -2  -2  -1   12.37    0.88 
   2   2   1   12.88    0.94 
   2   2   1   11.55    0.84 
  -3  -2  -1    0.77    0.37 
   3   2   1    0.35    0.37 
   3   2   1    0.60    0.28 
  -4  -2  -1    5.33    0.66 
   4   2   1    5.31    0.56 
   4   2   1    5.13    0.70 
  -5  -2  -1    6.04    0.79 
   5   2   1    5.35    0.74 
   5   2   1    7.17    0.67 
  -6  -2  -1   38.50    2.37 
   6   2   1   35.63    2.35 
   6   2   1   34.52    2.18 
  -7  -2  -1    0.30    0.52 
   7   2   1    0.44    0.34 
   7   2   1   -0.06    0.46 
  -8  -2  -1    7.17    1.01 
   8   2   1    7.06    1.02 
   8   2   1    9.48    0.89 
  -9  -2  -1    7.48    1.09 
   9   2   1    8.23    0.90 
   9   2   1    7.61    1.06 
 -10  -2  -1    0.45    0.64 
  10   2   1   -0.90    0.61 
  10   2   1    0.95    0.46 
 -11  -2  -1    4.03    0.94 
  11   2   1    2.99    0.87 
 -12  -2  -1    0.29    0.67 
  12   2   1   -0.13    0.72 
 -13  -2  -1    0.95    0.77 
  13   2   1    0.23    0.84 
  16  -3  -1    5.55    1.07 
 -16   3   1    4.99    1.23 
  15  -3  -1    2.02    0.77 
 -15   3   1    1.07    0.83 
  14  -3  -1   -0.28    0.55 
  14  -3  -1    0.17    0.52 
 -14   3   1    1.12    0.80 
  13  -3  -1    1.02    0.60 
  13  -3  -1    0.76    0.53 
 -13   3   1    0.67    0.66 
  12  -3  -1    8.01    1.03 
  12  -3  -1    9.35    1.05 
 -12   3   1   10.19    1.35 
  11  -3  -1    2.47    0.63 
  11  -3  -1    1.82    0.59 
 -11   3   1    2.88    0.82 
  10  -3  -1   -0.70    0.36 
  10  -3  -1   -0.59    0.39 
 -10   3   1    0.15    0.50 
   9  -3  -1    5.55    0.69 
   9  -3  -1    5.02    0.66 
  -9   3   1    4.40    0.77 
   8  -3  -1    3.49    0.51 
   8  -3  -1    5.44    0.65 
  -8   3   1    3.41    0.67 
   7  -3  -1    7.58    0.77 
   7  -3  -1    6.68    0.65 
  -7   3   1    6.16    0.87 
   6  -3  -1   41.37    2.35 
   6  -3  -1   40.08    2.42 
  -6   3   1   40.18    2.52 
   5  -3  -1    7.32    0.58 
   5  -3  -1    8.14    0.73 
  -5   3   1    7.58    0.78 
   4  -3  -1  150.44    8.21 
   4  -3  -1  154.65    8.11 
  -4   3   1  145.43    8.24 
   3  -3  -1  126.94    6.67 
  -3   3   1  124.32    6.78 
  -3   3   1  119.85    6.78 
   2  -3  -1  133.96    6.98 
  -2   3   1  126.23    7.07 
  -2   3   1  127.51    7.06 
  -1   3   1   24.01    1.42 
  -1   3   1   24.12    1.49 
  -1   3   1   24.84    1.46 
   0   3   1   80.11    4.46 
   0   3   1   81.81    4.46 
   0   3   1   80.26    4.47 
   1   3   1   35.98    2.11 
   1   3   1   36.37    2.12 
   1   3   1   35.89    2.13 
  -2  -3  -1    1.98    0.44 
   2   3   1    2.37    0.39 
   2   3   1    2.82    0.48 
  -3  -3  -1   10.27    0.88 
   3   3   1    9.64    0.79 
   3   3   1    9.20    0.91 
  -4  -3  -1    9.50    0.92 
   4   3   1    8.03    0.85 
   4   3   1    7.81    0.72 
  -5  -3  -1   -0.87    0.33 
   5   3   1    0.08    0.40 
   5   3   1    0.32    0.30 
  -6  -3  -1    2.51    0.65 
   6   3   1    4.06    0.56 
   6   3   1    4.07    0.71 
  -7  -3  -1    0.46    0.56 
   7   3   1    1.32    0.43 
   7   3   1    0.65    0.61 
  -8  -3  -1   -0.27    0.53 
   8   3   1   -0.65    0.36 
   8   3   1   -0.41    0.51 
  -9  -3  -1    0.07    0.61 
   9   3   1    0.38    0.40 
   9   3   1    0.10    0.62 
 -10  -3  -1    2.36    0.79 
  10   3   1    0.81    0.77 
 -11  -3  -1    1.01    0.74 
  11   3   1    0.05    0.64 
 -12  -3  -1    0.63    0.69 
  12   3   1   -0.42    0.80 
 -13  -3  -1   -0.79    0.64 
  13   3   1    0.23    0.84 
  16  -4  -1    0.08    0.61 
 -16   4   1    1.72    0.91 
  15  -4  -1   -0.92    0.63 
  15  -4  -1    0.66    0.61 
 -15   4   1   -0.14    0.73 
  14  -4  -1    1.03    0.61 
  14  -4  -1    1.24    0.66 
 -14   4   1    0.70    0.70 
  13  -4  -1    0.49    0.50 
  13  -4  -1    0.72    0.62 
 -13   4   1    0.78    0.68 
  12  -4  -1   -0.42    0.40 
  12  -4  -1   -0.66    0.50 
 -12   4   1   -0.01    0.58 
  11  -4  -1    4.42    0.74 
  11  -4  -1    3.53    0.62 
 -11   4   1    3.41    0.83 
  10  -4  -1    2.38    0.50 
  10  -4  -1    1.66    0.54 
 -10   4   1    1.42    0.66 
   9  -4  -1    1.43    0.39 
   9  -4  -1    0.84    0.47 
  -9   4   1    1.62    0.57 
   8  -4  -1    1.57    0.35 
   8  -4  -1    2.66    0.54 
  -8   4   1    1.21    0.58 
   7  -4  -1    3.30    0.61 
   7  -4  -1    3.85    0.44 
  -7   4   1    3.21    0.66 
   6  -4  -1    1.53    0.48 
   6  -4  -1    1.44    0.29 
  -6   4   1    1.41    0.48 
   5  -4  -1   29.33    1.64 
   5  -4  -1   26.59    1.81 
  -5   4   1   30.17    1.87 
   4  -4  -1   20.55    1.31 
   4  -4  -1   16.51    1.09 
  -4   4   1   22.87    1.33 
   3  -4  -1   10.15    0.62 
  -3   4   1    9.29    0.77 
  -3   4   1    8.45    0.76 
   2  -4  -1    9.83    0.63 
  -2   4   1    8.32    0.73 
  -2   4   1    7.85    0.79 
  -1   4   1   46.21    2.71 
  -1   4   1   47.64    2.66 
  -1   4   1   46.86    2.70 
   0   4   1    7.04    0.68 
   0   4   1    7.48    0.68 
   0   4   1    8.20    0.70 
   1   4   1   18.84    1.25 
   1   4   1   18.76    1.24 
   1   4   1   17.58    1.25 
  -2  -4  -1   53.73    3.12 
   2   4   1   52.93    3.14 
   2   4   1   52.73    3.06 
  -3  -4  -1    3.77    0.60 
   3   4   1    2.30    0.53 
   3   4   1    2.26    0.44 
  -4  -4  -1    4.20    0.67 
   4   4   1    2.87    0.61 
   4   4   1    3.77    0.52 
  -5  -4  -1    7.52    0.95 
   5   4   1    8.26    0.99 
   5   4   1    8.09    0.79 
  -6  -4  -1   -0.07    0.48 
   6   4   1   -0.22    0.34 
   6   4   1   -0.52    0.51 
  -7  -4  -1    0.91    0.59 
   7   4   1    0.51    0.40 
   7   4   1   -1.01    0.46 
  -8  -4  -1    1.79    0.74 
   8   4   1    0.46    0.69 
   8   4   1    0.81    0.44 
  -9  -4  -1    0.42    0.63 
   9   4   1   -0.25    0.68 
   9   4   1    0.49    0.44 
 -10  -4  -1    1.03    0.72 
  10   4   1    0.58    0.70 
 -11  -4  -1    0.73    0.70 
  11   4   1   -0.03    0.72 
 -12  -4  -1    0.26    0.72 
  12   4   1    1.44    0.93 
  17  -5  -1    0.76    0.66 
 -17   5   1    0.34    0.88 
  16  -5  -1   -0.09    0.58 
 -16   5   1    0.58    0.78 
  15  -5  -1   -0.06    0.64 
  15  -5  -1   -0.98    0.43 
 -15   5   1    0.90    0.82 
  14  -5  -1   -0.29    0.59 
  14  -5  -1   -0.39    0.44 
 -14   5   1   -0.10    0.69 
  13  -5  -1   -0.67    0.41 
  13  -5  -1    0.30    0.61 
 -13   5   1    0.55    0.73 
  12  -5  -1    0.55    0.41 
  12  -5  -1   -0.15    0.58 
 -12   5   1    0.15    0.64 
  11  -5  -1    1.06    0.44 
  11  -5  -1    0.12    0.55 
 -11   5   1    0.03    0.53 
  10  -5  -1    0.71    0.53 
  10  -5  -1    0.74    0.36 
 -10   5   1    0.27    0.51 
   9  -5  -1    1.31    0.34 
   9  -5  -1    2.06    0.56 
  -9   5   1    2.20    0.66 
   8  -5  -1   27.35    1.67 
   8  -5  -1   27.99    1.88 
  -8   5   1   27.86    1.97 
   7  -5  -1   31.60    2.00 
   7  -5  -1   31.21    1.80 
  -7   5   1   29.40    2.05 
   6  -5  -1    3.88    0.36 
   6  -5  -1    3.36    0.61 
  -6   5   1    3.99    0.64 
   5  -5  -1    1.46    0.43 
   5  -5  -1    1.17    0.20 
  -5   5   1    1.72    0.49 
   4  -5  -1    5.61    0.44 
   4  -5  -1    7.32    0.76 
  -4   5   1    7.55    0.77 
   3  -5  -1    1.08    0.24 
  -3   5   1    1.71    0.45 
  -3   5   1    0.99    0.36 
  -2   5   1   -0.48    0.34 
  -2   5   1    0.55    0.24 
  -2   5   1    1.38    0.42 
  -1   5   1  107.47    5.93 
  -1   5   1  106.25    5.93 
  -1   5   1  105.94    5.87 
   0   5   1   41.96    2.46 
   0   5   1   40.43    2.46 
   0   5   1   40.93    2.44 
   1   5   1   54.31    3.22 
   1   5   1   54.77    3.25 
   1   5   1   57.78    3.27 
  -2  -5  -1   40.18    2.47 
   2   5   1   42.70    2.52 
   2   5   1   37.90    2.40 
  -3  -5  -1    5.65    0.77 
   3   5   1    5.20    0.63 
   3   5   1    4.21    0.68 
  -4  -5  -1    4.14    0.71 
   4   5   1    3.36    0.66 
   4   5   1    5.01    0.61 
  -5  -5  -1    0.42    0.47 
   5   5   1    0.34    0.36 
   5   5   1   -0.41    0.51 
  -6  -5  -1    9.83    1.20 
   6   5   1   11.48    1.26 
   6   5   1   10.73    1.02 
  -7  -5  -1    1.79    0.73 
   7   5   1    1.39    0.75 
   7   5   1    2.03    0.52 
  -8  -5  -1    1.49    0.70 
   8   5   1    0.91    0.47 
   8   5   1    0.37    0.61 
  -9  -5  -1    0.37    0.67 
   9   5   1    1.66    0.76 
 -10  -5  -1   -0.25    0.60 
  10   5   1    1.05    0.85 
 -11  -5  -1    0.68    0.73 
  11   5   1   -0.62    0.79 
  17  -6  -1    0.42    0.54 
 -17   6   1   -0.67    0.66 
  16  -6  -1    0.22    0.52 
  16  -6  -1    1.02    0.74 
 -16   6   1   -1.30    0.67 
  15  -6  -1   -0.03    0.48 
  15  -6  -1   -1.68    0.58 
 -15   6   1    0.16    0.69 
  14  -6  -1   -0.45    0.63 
  14  -6  -1   -0.32    0.41 
 -14   6   1    0.64    0.68 
  13  -6  -1    0.18    0.63 
  13  -6  -1   -0.05    0.35 
 -13   6   1   -0.12    0.59 
  12  -6  -1    1.55    0.46 
  12  -6  -1    2.63    0.72 
 -12   6   1    1.75    0.72 
  11  -6  -1    4.40    0.62 
  11  -6  -1    5.94    0.90 
 -11   6   1    7.36    1.12 
  10  -6  -1   11.48    1.19 
  10  -6  -1   12.21    0.92 
 -10   6   1    9.93    1.27 
   9  -6  -1    0.37    0.25 
   9  -6  -1    0.83    0.52 
  -9   6   1    0.27    0.49 
   8  -6  -1    0.27    0.22 
   8  -6  -1    0.29    0.50 
  -8   6   1    1.28    0.51 
   7  -6  -1    2.03    0.28 
   7  -6  -1    2.24    0.54 
  -7   6   1    2.88    0.59 
   6  -6  -1   13.79    1.19 
   6  -6  -1   13.43    0.82 
  -6   6   1   13.88    1.19 
   5  -6  -1    2.80    0.62 
   5  -6  -1    3.18    0.29 
  -5   6   1    3.30    0.64 
   4  -6  -1    2.66    0.30 
  -4   6   1    2.31    0.52 
  -4   6   1    2.01    0.53 
   3  -6  -1    3.65    0.41 
  -3   6   1    3.87    0.59 
  -3   6   1    3.94    0.60 
  -2   6   1    1.25    0.31 
  -2   6   1    1.73    0.47 
  -2   6   1    0.77    0.41 
  -1   6   1   11.14    0.90 
  -1   6   1   13.79    1.01 
  -1   6   1   10.40    0.98 
   0   6   1   13.20    1.02 
   0   6   1   11.55    0.99 
   0   6   1   12.17    1.03 
   1   6   1    7.19    0.83 
   1   6   1    8.72    0.87 
   1   6   1    8.27    0.82 
  -2  -6  -1    5.61    0.78 
   2   6   1    5.62    0.67 
   2   6   1    6.53    0.77 
  -3  -6  -1    1.03    0.51 
   3   6   1    1.23    0.44 
   3   6   1    1.26    0.51 
  -4  -6  -1    6.34    0.91 
   4   6   1    7.58    0.81 
   4   6   1    6.62    0.93 
  -5  -6  -1    9.27    1.14 
   5   6   1   10.04    0.97 
   5   6   1    9.17    1.15 
  -6  -6  -1    0.40    0.54 
   6   6   1   -0.07    0.56 
   6   6   1   -0.12    0.39 
  -7  -6  -1    0.54    0.61 
   7   6   1    1.24    0.50 
   7   6   1    0.24    0.66 
  -8  -6  -1    0.58    0.67 
   8   6   1   -0.51    0.60 
  -9  -6  -1   -0.63    0.59 
   9   6   1   -0.80    0.64 
 -10  -6  -1    1.89    0.83 
  10   6   1    2.15    0.90 
  17  -7  -1    0.37    0.80 
 -17   7   1   -1.18    0.72 
  16  -7  -1    1.11    0.86 
  16  -7  -1   -1.26    0.67 
 -16   7   1   -0.43    0.65 
  15  -7  -1    2.62    0.89 
  15  -7  -1    1.52    0.51 
 -15   7   1    0.45    0.72 
  14  -7  -1    1.45    0.72 
  14  -7  -1    1.23    0.47 
 -14   7   1   -0.25    0.72 
  13  -7  -1    0.02    0.63 
  13  -7  -1    0.23    0.36 
 -13   7   1    0.50    0.67 
  12  -7  -1    2.70    0.47 
  12  -7  -1    3.74    0.82 
 -12   7   1    0.90    0.67 
  11  -7  -1    0.26    0.64 
  11  -7  -1    2.88    0.45 
 -11   7   1    3.65    0.84 
  10  -7  -1    2.56    0.70 
  10  -7  -1    1.26    0.33 
 -10   7   1    2.47    0.72 
   9  -7  -1    3.38    0.73 
   9  -7  -1    4.25    0.41 
  -9   7   1    3.69    0.80 
   8  -7  -1    3.44    0.35 
   8  -7  -1    3.51    0.72 
  -8   7   1    4.81    0.81 
   7  -7  -1   -0.32    0.42 
   7  -7  -1    0.30    0.16 
  -7   7   1   -0.09    0.44 
   6  -7  -1    4.80    0.38 
   6  -7  -1    4.71    0.76 
  -6   7   1    5.65    0.79 
   5  -7  -1    1.83    0.25 
   5  -7  -1    0.92    0.48 
  -5   7   1    2.00    0.51 
   4  -7  -1    1.93    0.29 
  -4   7   1    1.38    0.46 
  -4   7   1    1.45    0.48 
  -3   7   1    7.59    0.85 
  -3   7   1    7.87    0.86 
  -2   7   1   26.65    1.72 
  -2   7   1   28.27    1.86 
  -2   7   1   28.62    1.86 
  -1   7   1   14.60    1.13 
  -1   7   1   16.59    1.24 
  -1   7   1   15.84    1.23 
   0   7   1    8.96    0.88 
   0   7   1    8.14    0.85 
   0   7   1    7.26    0.87 
   1   7   1    5.14    0.68 
   1   7   1    5.48    0.77 
   1   7   1    4.59    0.67 
  -2  -7  -1    0.30    0.40 
   2   7   1    0.26    0.36 
   2   7   1   -0.03    0.41 
  -3  -7  -1   -0.76    0.42 
   3   7   1    0.07    0.38 
   3   7   1    0.17    0.47 
  -4  -7  -1    0.94    0.54 
   4   7   1    1.62    0.69 
   4   7   1    0.89    0.46 
  -5  -7  -1    1.04    0.57 
   5   7   1    0.82    0.46 
   5   7   1    1.74    0.67 
  -6  -7  -1    0.31    0.56 
   6   7   1   -0.48    0.58 
   6   7   1    0.39    0.43 
  -7  -7  -1    1.30    0.68 
   7   7   1   -0.15    0.70 
  -8  -7  -1    0.10    0.66 
   8   7   1    0.90    0.77 
  -9  -7  -1    1.04    0.76 
   9   7   1    1.97    0.97 
 -10  -7  -1    0.65    0.76 
  10   7   1    0.53    0.87 
  17  -8  -1   -0.19    0.81 
 -17   8   1    0.49    0.85 
  16  -8  -1    1.19    0.85 
 -16   8   1    1.59    0.90 
  15  -8  -1    0.19    0.72 
 -15   8   1   -0.26    0.59 
  14  -8  -1    0.09    0.39 
  14  -8  -1    1.48    0.76 
 -14   8   1   -0.08    0.64 
  13  -8  -1    0.17    0.62 
  13  -8  -1    0.23    0.31 
 -13   8   1   -1.01    0.59 
  12  -8  -1    1.43    0.36 
  12  -8  -1    1.43    0.72 
 -12   8   1    2.00    0.79 
  11  -8  -1    4.33    0.47 
  11  -8  -1    3.89    0.86 
 -11   8   1    2.86    0.77 
  10  -8  -1    0.11    0.22 
  10  -8  -1    0.47    0.60 
 -10   8   1   -0.35    0.43 
   9  -8  -1    4.27    0.39 
   9  -8  -1    4.90    0.81 
  -9   8   1    4.42    0.86 
   8  -8  -1    4.80    0.82 
   8  -8  -1    3.52    0.32 
  -8   8   1    5.84    0.88 
   7  -8  -1    2.95    0.27 
   7  -8  -1    3.30    0.73 
  -7   8   1    2.30    0.60 
   6  -8  -1    3.52    0.31 
   6  -8  -1    2.67    0.63 
  -6   8   1    3.72    0.70 
   5  -8  -1   12.02    0.82 
   5  -8  -1   13.82    1.23 
  -5   8   1   12.37    1.14 
   4  -8  -1    2.85    0.39 
  -4   8   1    3.29    0.60 
  -4   8   1    2.84    0.57 
  -3   8   1    1.16    0.47 
  -3   8   1    1.31    0.35 
  -3   8   1    0.98    0.50 
  -2   8   1   18.85    1.29 
  -2   8   1   18.79    1.43 
  -2   8   1   18.46    1.44 
  -1   8   1    4.69    0.74 
  -1   8   1    5.46    0.67 
  -1   8   1    6.12    0.79 
   0   8   1    0.46    0.42 
   0   8   1    1.15    0.53 
   0   8   1    0.64    0.44 
   1   8   1    6.41    0.92 
   1   8   1    7.50    0.85 
   1   8   1    7.40    0.92 
  -2  -8  -1    1.01    0.52 
   2   8   1    1.89    0.57 
   2   8   1    0.57    0.61 
  -3  -8  -1    1.00    0.55 
   3   8   1    0.43    0.45 
   3   8   1    0.13    0.53 
  -4  -8  -1   -0.28    0.49 
   4   8   1   -0.25    0.42 
   4   8   1    0.57    0.61 
  -5  -8  -1    0.46    0.54 
   5   8   1    1.12    0.69 
   5   8   1    0.09    0.44 
  -6  -8  -1    1.14    0.66 
   6   8   1   -0.92    0.54 
   6   8   1    0.87    0.48 
  -7  -8  -1    1.48    0.68 
   7   8   1    0.38    0.80 
  -8  -8  -1   -1.03    0.52 
   8   8   1    0.78    0.77 
  -9  -8  -1   -0.20    0.66 
   9   8   1   -0.19    0.80 
  17  -9  -1   -0.15    0.87 
 -17   9   1    0.74    0.89 
  16  -9  -1   -0.28    0.74 
 -16   9   1    0.27    0.83 
  15  -9  -1    0.52    0.77 
 -15   9   1   -1.02    0.71 
  14  -9  -1    3.14    0.92 
 -14   9   1    1.44    0.79 
  13  -9  -1    1.63    0.76 
 -13   9   1    1.08    0.71 
  12  -9  -1    1.85    0.73 
 -12   9   1    1.47    0.70 
  11  -9  -1    1.01    0.72 
  11  -9  -1    1.95    0.29 
 -11   9   1    1.85    0.77 
  10  -9  -1    2.32    0.76 
  10  -9  -1    1.23    0.20 
 -10   9   1    2.28    0.75 
   9  -9  -1   -0.02    0.58 
  -9   9   1    1.10    0.60 
   8  -9  -1    0.00    0.57 
  -8   9   1    1.15    0.55 
   7  -9  -1   -0.27    0.54 
   7  -9  -1    0.11    0.13 
  -7   9   1    0.01    0.50 
   6  -9  -1    5.89    0.87 
   6  -9  -1    4.14    0.39 
  -6   9   1    2.65    0.63 
   5  -9  -1    0.86    0.58 
   5  -9  -1    1.06    0.29 
  -5   9   1    1.40    0.55 
   4  -9  -1   10.75    0.83 
  -4   9   1   10.93    1.13 
  -4   9   1   10.00    1.12 
  -3   9   1    0.43    0.31 
  -3   9   1    0.89    0.51 
  -3   9   1    0.08    0.42 
  -2   9   1   -0.47    0.40 
  -2   9   1   -0.41    0.33 
  -2   9   1   -0.45    0.42 
  -1   9   1    0.24    0.40 
  -1   9   1    0.51    0.51 
  -1   9   1    0.07    0.42 
   0   9   1    0.08    0.45 
   0   9   1   -0.21    0.48 
   0   9   1    0.12    0.51 
   1   9   1    2.19    0.61 
   1   9   1    1.86    0.68 
   1   9   1    2.00    0.66 
  -2  -9  -1    2.04    0.65 
   2   9   1    2.43    0.60 
   2   9   1    0.64    0.63 
  -3  -9  -1    6.08    0.97 
   3   9   1    5.81    0.83 
   3   9   1    5.21    0.94 
  -4  -9  -1    1.44    0.64 
   4   9   1    2.05    0.74 
   4   9   1    1.45    0.55 
  -5  -9  -1    0.43    0.57 
   5   9   1    0.81    0.53 
   5   9   1    0.11    0.73 
  -6  -9  -1    0.98    0.63 
   6   9   1    2.65    0.85 
  -7  -9  -1    0.19    0.59 
   7   9   1    0.06    0.81 
  -8  -9  -1    0.34    0.66 
   8   9   1   -0.01    0.76 
  17 -10  -1    0.46    0.81 
 -17  10   1   -0.27    0.78 
  16 -10  -1   -0.78    0.71 
 -16  10   1   -0.43    0.71 
  15 -10  -1    3.64    0.99 
 -15  10   1    3.59    0.99 
  14 -10  -1    3.25    0.95 
 -14  10   1    2.40    0.90 
  13 -10  -1    0.65    0.76 
 -13  10   1   -0.46    0.66 
  12 -10  -1    2.09    0.82 
 -12  10   1    0.48    0.64 
  11 -10  -1    8.10    1.16 
 -11  10   1    5.84    1.04 
  10 -10  -1    0.85    0.68 
 -10  10   1    0.22    0.63 
   9 -10  -1    9.38    1.22 
  -9  10   1    7.23    1.06 
   8 -10  -1    0.84    0.64 
  -8  10   1   -0.62    0.51 
   7 -10  -1    5.17    0.41 
   7 -10  -1    6.15    0.92 
  -7  10   1    6.66    0.93 
   6 -10  -1   17.46    1.09 
   6 -10  -1   17.67    1.55 
  -6  10   1   16.06    1.46 
   5 -10  -1    2.48    0.73 
   5 -10  -1    2.42    0.38 
  -5  10   1    1.91    0.65 
   4 -10  -1    0.50    0.31 
  -4  10   1    0.14    0.54 
  -4  10   1    0.77    0.54 
  -3  10   1    0.02    0.48 
  -3  10   1    0.37    0.36 
  -3  10   1    0.09    0.46 
  -2  10   1    1.44    0.68 
  -2  10   1    2.57    0.56 
  -2  10   1    4.20    0.77 
  -1  10   1    6.69    0.86 
  -1  10   1    8.02    1.06 
  -1  10   1    6.72    0.95 
   0  10   1    6.87    0.91 
   0  10   1    7.38    1.01 
   0  10   1    4.57    0.81 
   1  10   1   17.22    1.65 
   1  10   1   20.32    1.64 
   1  10   1   22.34    1.75 
  -2 -10  -1    1.26    0.60 
   2  10   1    0.56    0.55 
   2  10   1    0.56    0.59 
  -3 -10  -1    0.82    0.60 
   3  10   1    2.13    0.61 
   3  10   1    0.53    0.69 
  -4 -10  -1    0.47    0.55 
   4  10   1    0.83    0.71 
   4  10   1   -0.09    0.49 
  -5 -10  -1   -0.17    0.52 
   5  10   1    0.20    0.78 
  -6 -10  -1    1.56    0.72 
   6  10   1    1.35    0.91 
  -7 -10  -1   -0.43    0.57 
   7  10   1    0.22    0.84 
  17 -11  -1    0.34    0.85 
 -17  11   1    0.90    0.94 
  16 -11  -1    0.39    0.82 
 -16  11   1   -0.15    0.74 
  15 -11  -1   -0.11    0.77 
 -15  11   1    0.02    0.81 
  14 -11  -1    1.19    0.77 
 -14  11   1    0.15    0.77 
  13 -11  -1   -0.01    0.74 
 -13  11   1    0.45    0.70 
  12 -11  -1   -0.91    0.67 
 -12  11   1   -0.21    0.66 
  11 -11  -1    0.50    0.76 
 -11  11   1    0.75    0.66 
  10 -11  -1    2.71    0.86 
 -10  11   1    1.55    0.70 
   9 -11  -1    0.79    0.68 
  -9  11   1   -0.47    0.54 
   8 -11  -1    0.50    0.62 
  -8  11   1   -0.23    0.53 
   7 -11  -1    8.50    0.60 
   7 -11  -1    8.35    1.20 
  -7  11   1    8.87    1.14 
   6 -11  -1    0.13    0.66 
   6 -11  -1    1.91    0.33 
  -6  11   1    0.52    0.54 
   5 -11  -1    8.19    0.75 
   5 -11  -1    8.17    1.15 
  -5  11   1    9.35    1.16 
   4 -11  -1    1.00    0.38 
   4 -11  -1    0.66    0.64 
  -4  11   1   -0.80    0.56 
  -3  11   1   -0.58    0.41 
  -3  11   1    1.42    0.67 
  -3  11   1   -0.23    0.56 
  -2  11   1   -1.06    0.43 
  -2  11   1    0.39    0.56 
  -2  11   1    0.26    0.43 
  -1  11   1    5.84    0.87 
  -1  11   1    6.19    0.95 
  -1  11   1    6.84    1.08 
   0  11   1    3.92    0.78 
   0  11   1    2.44    0.71 
   0  11   1    2.32    0.79 
   1  11   1    1.03    0.69 
   1  11   1    2.26    0.67 
   1  11   1    1.88    0.79 
  -2 -11  -1    0.66    0.62 
   2  11   1   -0.33    0.61 
   2  11   1    1.23    0.61 
  -3 -11  -1    0.07    0.59 
   3  11   1   -0.50    0.65 
   3  11   1    0.00    0.53 
  -4 -11  -1    0.77    0.63 
   4  11   1    0.08    0.55 
   4  11   1   -0.08    0.75 
  -5 -11  -1   -0.28    0.57 
   5  11   1   -0.70    0.65 
  -6 -11  -1    0.74    0.61 
   6  11   1    0.25    0.78 
  17 -12  -1   -1.10    0.80 
 -17  12   1   -0.37    0.66 
  16 -12  -1   -0.47    0.79 
 -16  12   1    0.16    0.80 
  15 -12  -1    6.27    1.19 
 -15  12   1    3.34    1.03 
  14 -12  -1    0.66    0.80 
 -14  12   1   -0.36    0.73 
  13 -12  -1    4.15    1.05 
 -13  12   1    1.20    0.72 
  12 -12  -1    0.08    0.77 
 -12  12   1   -0.21    0.65 
  11 -12  -1    2.58    0.95 
 -11  12   1    2.37    0.86 
  10 -12  -1   -0.26    0.63 
 -10  12   1    0.60    0.62 
   9 -12  -1   -0.27    0.67 
  -9  12   1    1.06    0.62 
   8 -12  -1    0.11    0.75 
  -8  12   1    0.28    0.58 
   7 -12  -1    0.82    0.73 
  -7  12   1    0.36    0.64 
   6 -12  -1    0.07    0.28 
   6 -12  -1    0.38    0.66 
  -6  12   1    0.93    0.57 
   5 -12  -1    0.75    0.37 
   5 -12  -1    1.67    0.71 
  -5  12   1    1.01    0.66 
   4 -12  -1    5.36    0.70 
   4 -12  -1    6.22    1.04 
  -4  12   1    5.49    1.01 
  -3  12   1    1.85    0.75 
  -3  12   1    1.77    0.57 
  -3  12   1    2.13    0.78 
  -2  12   1    1.93    0.57 
  -2  12   1   -0.07    0.59 
  -2  12   1    0.85    0.67 
  -1  12   1    0.01    0.55 
  -1  12   1   -0.28    0.60 
  -1  12   1   -0.13    0.57 
   0  12   1   -0.07    0.56 
   0  12   1    0.35    0.65 
   0  12   1    0.31    0.56 
   1  12   1   -0.50    0.52 
   1  12   1    0.10    0.62 
  -2 -12  -1    0.34    0.61 
   2  12   1    1.83    0.81 
   2  12   1   -0.27    0.53 
  -3 -12  -1    0.05    0.58 
   3  12   1    0.34    0.69 
   3  12   1   -0.29    0.57 
  -4 -12  -1   -0.18    0.53 
   4  12   1    1.08    0.82 
  16 -13  -1    1.16    0.92 
 -16  13   1   -0.48    0.67 
  15 -13  -1    1.15    0.91 
 -15  13   1    1.94    0.98 
  14 -13  -1   -0.21    0.82 
 -14  13   1    0.46    0.84 
  13 -13  -1   -1.34    0.70 
 -13  13   1    0.15    0.75 
  12 -13  -1    1.05    0.90 
 -12  13   1    0.05    0.61 
  11 -13  -1   -0.19    0.72 
 -11  13   1    0.00    0.56 
  10 -13  -1    3.31    0.89 
 -10  13   1    2.65    0.81 
   9 -13  -1    1.92    0.82 
  -9  13   1   -0.28    0.55 
   8 -13  -1    4.93    1.10 
  -8  13   1    4.46    0.99 
   7 -13  -1    1.08    0.78 
  -7  13   1    0.67    0.61 
   6 -13  -1    0.13    0.33 
   6 -13  -1    0.00    0.70 
  -6  13   1    0.13    0.57 
   5 -13  -1    1.78    0.83 
   5 -13  -1    0.88    0.41 
  -5  13   1    0.35    0.72 
   4 -13  -1    5.85    1.06 
   4 -13  -1    5.87    0.78 
  -4  13   1    5.49    1.03 
   3 -13  -1   -0.06    0.71 
  -3  13   1    0.19    0.69 
  -3  13   1   -0.10    0.50 
  -2  13   1    0.69    0.57 
  -2  13   1    1.04    0.76 
  -1  13   1    0.08    0.56 
  -1  13   1    0.07    0.67 
  -1  13   1   -0.47    0.58 
   0  13   1    0.35    0.62 
   0  13   1    0.03    0.66 
   0  13   1    1.05    0.76 
  -1 -13  -1    0.67    0.61 
   1  13   1    1.12    0.76 
   1  13   1   -0.15    0.61 
  -2 -13  -1    0.61    0.64 
   2  13   1    0.67    0.67 
   2  13   1    0.36    0.76 
  -3 -13  -1    2.20    0.84 
   3  13   1    4.66    1.14 
  16 -14  -1    0.28    0.90 
 -16  14   1   -0.12    0.71 
  15 -14  -1    3.14    1.02 
 -15  14   1    1.64    0.89 
  14 -14  -1   -0.18    0.84 
 -14  14   1    0.61    0.81 
  13 -14  -1    1.15    0.94 
 -13  14   1    0.26    0.74 
  12 -14  -1    0.37    0.81 
 -12  14   1    0.71    0.71 
  11 -14  -1    5.76    1.21 
 -11  14   1    6.59    1.22 
  10 -14  -1    5.07    1.11 
 -10  14   1    1.17    0.80 
   9 -14  -1    1.27    0.83 
  -9  14   1    0.76    0.72 
   8 -14  -1    0.24    0.67 
  -8  14   1   -1.04    0.49 
   7 -14  -1   -0.30    0.72 
  -7  14   1    0.98    0.70 
   6 -14  -1   -0.18    0.69 
  -6  14   1    0.10    0.60 
   5 -14  -1    1.87    0.87 
   5 -14  -1    3.49    0.61 
  -5  14   1    3.67    0.86 
   4 -14  -1    2.14    0.83 
   4 -14  -1    3.30    0.61 
  -4  14   1    4.15    1.00 
   3 -14  -1    4.38    1.00 
  -3  14   1    3.53    0.97 
   2 -14  -1    2.86    0.83 
  -2  14   1    0.90    0.68 
  -2  14   1    3.34    0.99 
   1 -14  -1    2.00    0.77 
  -1  14   1    0.66    0.82 
  -1  14   1    2.29    0.82 
   0 -14  -1    0.36    0.63 
   0  14   1    3.57    0.99 
   0  14   1    0.72    0.74 
  -1 -14  -1   -0.20    0.60 
   1  14   1    1.77    0.83 
  -2 -14  -1   -0.87    0.57 
   2  14   1    0.80    0.85 
  15 -15  -1    0.02    0.91 
 -15  15   1    0.16    0.83 
  14 -15  -1    0.30    0.89 
 -14  15   1    0.43    0.73 
  13 -15  -1   -0.07    0.75 
 -13  15   1    0.95    0.85 
  12 -15  -1    0.82    0.93 
 -12  15   1    0.50    0.77 
  11 -15  -1    2.08    0.94 
 -11  15   1   -1.26    0.62 
  10 -15  -1    1.95    0.94 
 -10  15   1    0.38    0.64 
   9 -15  -1   -0.02    0.77 
  -9  15   1    0.22    0.70 
   8 -15  -1    8.45    1.29 
  -8  15   1    5.73    1.10 
   7 -15  -1   10.56    1.51 
  -7  15   1    9.69    1.33 
   6 -15  -1   -0.37    0.74 
  -6  15   1    0.56    0.76 
   5 -15  -1    1.49    0.79 
  -5  15   1    0.38    0.70 
   4 -15  -1   -0.77    0.70 
  -4  15   1    0.06    0.74 
   3 -15  -1    0.12    0.45 
   3 -15  -1   -0.14    0.67 
  -3  15   1   -0.26    0.75 
   2 -15  -1    0.20    0.70 
  -2  15   1    0.22    0.62 
  -2  15   1    0.22    0.73 
   1 -15  -1    0.35    0.67 
  -1  15   1   -0.83    0.61 
  -1  15   1   -0.19    0.80 
   0 -15  -1    0.10    0.71 
   0  15   1    0.53    0.79 
  14 -16  -1    0.77    0.97 
 -14  16   1    0.48    0.92 
  13 -16  -1   -0.38    0.89 
 -13  16   1    0.00    0.70 
  12 -16  -1    0.71    0.88 
 -12  16   1    0.34    0.70 
  11 -16  -1    0.74    0.89 
 -11  16   1   -0.29    0.74 
  10 -16  -1   -0.51    0.72 
 -10  16   1    0.89    0.76 
   9 -16  -1    0.26    0.85 
  -9  16   1    0.31    0.78 
   8 -16  -1    8.32    1.39 
  -8  16   1    8.64    1.37 
   7 -16  -1    0.64    0.85 
  -7  16   1   -0.13    0.76 
   6 -16  -1    0.34    0.82 
  -6  16   1    0.19    0.77 
   5 -16  -1   -0.10    0.76 
  -5  16   1    0.84    0.88 
   4 -16  -1   -0.15    0.77 
  -4  16   1    0.25    0.77 
   3 -16  -1    0.10    0.76 
  -3  16   1   -0.54    0.80 
   2 -16  -1    0.55    0.81 
   2 -16  -1    0.82    0.55 
  -2  16   1   -1.23    0.77 
  12 -17  -1   -0.25    0.82 
 -12  17   1    0.53    0.85 
  11 -17  -1    0.97    0.97 
 -11  17   1    0.96    0.87 
  10 -17  -1    1.59    1.01 
 -10  17   1    2.70    1.04 
   9 -17  -1    3.24    1.11 
  -9  17   1    0.55    0.78 
   8 -17  -1    2.18    1.03 
  -8  17   1    0.38    0.84 
   7 -17  -1    4.93    1.16 
  -7  17   1    3.46    1.08 
   6 -17  -1    3.46    1.13 
  -6  17   1    2.95    1.07 
   5 -17  -1    1.01    0.90 
  -5  17   1    0.98    0.96 
  -5  18  -2   -0.65    0.83 
   5 -18   2    0.42    0.84 
  -6  18  -2    0.52    0.83 
   6 -18   2    0.48    0.89 
  -7  18  -2    1.00    0.78 
   7 -18   2    0.80    0.94 
  -8  18  -2    1.62    0.94 
   8 -18   2    0.98    0.94 
  -9  18  -2   -0.30    0.80 
   9 -18   2    2.79    1.09 
 -10  18  -2    4.02    1.14 
  10 -18   2    1.96    1.15 
 -11  18  -2    0.90    0.80 
  11 -18   2    0.09    0.95 
 -12  18  -2    0.53    0.84 
  12 -18   2    0.39    1.02 
  -2  17  -2    0.50    0.95 
   2 -17   2    0.59    0.77 
  -3  17  -2    0.65    0.96 
   3 -17   2    0.35    0.76 
  -4  17  -2    4.23    1.09 
   4 -17   2    1.85    0.91 
  -5  17  -2    2.14    1.01 
   5 -17   2    1.72    0.93 
  -6  17  -2    1.05    0.85 
   6 -17   2    1.64    0.92 
  -7  17  -2    1.78    0.95 
   7 -17   2    4.55    1.13 
  -8  17  -2    0.14    0.84 
   8 -17   2    0.02    0.84 
  -9  17  -2   -0.37    0.65 
   9 -17   2    0.11    0.86 
 -10  17  -2    1.17    0.86 
  10 -17   2    1.20    0.89 
 -11  17  -2    0.65    0.79 
  11 -17   2    1.47    1.05 
 -12  17  -2    0.50    0.80 
  12 -17   2    1.45    1.05 
 -13  17  -2    1.59    0.83 
  13 -17   2    0.09    0.81 
 -14  17  -2    0.92    0.97 
  14 -17   2    0.98    1.04 
   0  16  -2   -0.47    0.67 
   0  16  -2   -0.38    0.92 
  -1  16  -2    1.27    0.69 
  -1  16  -2    0.09    0.92 
   1 -16   2    0.49    0.66 
  -2  16  -2   -1.09    0.76 
  -2  16  -2    1.35    0.65 
   2 -16   2    0.21    0.70 
  -3  16  -2    3.94    1.11 
   3 -16   2    2.63    0.88 
  -4  16  -2   -0.29    0.68 
   4 -16   2   -0.91    0.70 
  -5  16  -2    1.68    0.86 
   5 -16   2    2.80    0.92 
  -6  16  -2    4.31    1.04 
   6 -16   2    0.58    0.87 
  -7  16  -2   -0.10    0.70 
   7 -16   2    1.46    0.92 
  -8  16  -2   -0.08    0.73 
   8 -16   2    0.04    0.81 
  -9  16  -2    0.14    0.68 
   9 -16   2   -1.02    0.78 
 -10  16  -2    2.86    0.96 
  10 -16   2    4.46    1.16 
 -11  16  -2    6.96    1.26 
  11 -16   2    4.07    1.13 
 -12  16  -2   -0.11    0.75 
  12 -16   2    1.32    0.92 
 -13  16  -2   -0.21    0.66 
  13 -16   2   -0.76    0.90 
 -14  16  -2    0.01    0.78 
  14 -16   2    1.14    1.01 
 -15  16  -2    0.27    0.72 
  15 -16   2    0.77    1.04 
   2  15  -2    2.38    0.93 
  -2 -15   2    1.56    0.88 
   1  15  -2   -0.99    0.64 
  -1 -15   2    1.02    0.80 
   0  15  -2    1.56    0.82 
   0  15  -2   -0.75    0.71 
   0 -15   2    0.77    0.64 
  -1  15  -2    1.89    0.91 
  -1  15  -2    1.11    0.64 
   1 -15   2    1.84    0.74 
  -2  15  -2   -1.23    0.71 
  -2  15  -2    1.21    0.62 
   2 -15   2    0.04    0.66 
  -3  15  -2    0.03    0.49 
  -3  15  -2    0.75    0.80 
   3 -15   2    0.87    0.69 
  -4  15  -2    0.33    0.79 
  -4  15  -2    0.01    0.46 
   4 -15   2   -0.34    0.63 
  -5  15  -2    1.56    0.74 
   5 -15   2    1.90    0.83 
  -6  15  -2    1.45    0.83 
   6 -15   2    1.93    0.84 
  -7  15  -2    4.65    1.05 
   7 -15   2    5.24    1.12 
  -8  15  -2    3.74    0.95 
   8 -15   2    3.22    1.08 
  -9  15  -2    0.85    0.78 
   9 -15   2    0.35    0.77 
 -10  15  -2    0.13    0.63 
  10 -15   2    0.03    0.75 
 -11  15  -2    0.56    0.74 
  11 -15   2   -0.01    0.75 
 -12  15  -2    1.99    0.84 
  12 -15   2    0.95    0.95 
 -13  15  -2    0.87    0.80 
  13 -15   2    0.39    0.89 
 -14  15  -2   -0.15    0.74 
  14 -15   2   -1.56    0.85 
 -15  15  -2   -0.20    0.68 
  15 -15   2   -0.78    0.87 
   3  14  -2    4.95    1.09 
  -3 -14   2    4.44    1.11 
   2  14  -2    0.42    0.75 
  -2 -14   2   -0.78    0.56 
   1  14  -2   -0.85    0.60 
  -1 -14   2    1.03    0.65 
   0  14  -2    0.43    0.67 
   0  14  -2   -0.63    0.68 
   0 -14   2    0.15    0.55 
  -1  14  -2   -0.52    0.57 
  -1  14  -2    0.61    0.62 
   1 -14   2    0.60    0.61 
  -2  14  -2    5.70    0.83 
  -2  14  -2    3.05    0.91 
   2 -14   2    5.43    0.94 
  -3  14  -2    0.42    0.45 
  -3  14  -2    0.39    0.69 
   3 -14   2    0.10    0.64 
  -4  14  -2    0.23    0.39 
  -4  14  -2    0.14    0.58 
   4 -14   2    0.42    0.68 
  -5  14  -2   -0.74    0.36 
  -5  14  -2    0.06    0.68 
   5 -14   2    0.64    0.74 
  -6  14  -2    2.75    0.87 
   6 -14   2    1.45    0.86 
  -7  14  -2    0.52    0.69 
   7 -14   2   -0.70    0.70 
  -8  14  -2    0.06    0.55 
   8 -14   2    0.43    0.82 
  -9  14  -2    0.95    0.67 
   9 -14   2    0.83    0.84 
 -10  14  -2    0.13    0.66 
  10 -14   2    2.92    0.92 
 -11  14  -2    1.72    0.82 
  11 -14   2    2.28    1.01 
 -12  14  -2   -0.38    0.69 
  12 -14   2    0.49    0.87 
 -13  14  -2    0.26    0.65 
  13 -14   2   -0.32    0.83 
 -14  14  -2    0.66    0.82 
  14 -14   2    0.82    0.89 
 -15  14  -2    0.90    0.82 
  15 -14   2   -0.29    0.89 
 -16  14  -2    5.19    1.31 
  16 -14   2    5.94    1.36 
   4  13  -2   -0.88    0.65 
  -4 -13   2    1.23    0.78 
   3  13  -2   -0.70    0.66 
  -3 -13   2    1.09    0.77 
   2  13  -2   -0.10    0.64 
  -2 -13   2   -0.94    0.56 
  -2 -13   2    0.52    0.57 
   1  13  -2    1.76    0.88 
   1  13  -2    2.13    0.77 
  -1 -13   2    0.27    0.54 
   0  13  -2    1.78    0.87 
   0  13  -2    0.94    0.63 
   0 -13   2    0.97    0.62 
  -1  13  -2    2.70    0.69 
  -1  13  -2    0.18    0.71 
   1 -13   2    1.98    0.73 
  -2  13  -2    3.47    0.69 
  -2  13  -2    2.63    0.84 
   2 -13   2    3.40    0.84 
  -3  13  -2    6.56    0.82 
  -3  13  -2    8.95    1.32 
   3 -13   2    6.29    1.04 
  -4  13  -2    2.80    0.50 
  -4  13  -2    1.85    0.77 
   4 -13   2    2.76    0.82 
  -5  13  -2    5.82    0.61 
  -5  13  -2    5.21    1.08 
   5 -13   2    5.43    1.02 
  -6  13  -2   11.10    1.37 
   6 -13   2   10.28    1.37 
  -7  13  -2    0.39    0.56 
   7 -13   2   -0.22    0.72 
  -8  13  -2   -0.14    0.54 
   8 -13   2    1.36    0.84 
  -9  13  -2    1.19    0.68 
   9 -13   2   -0.16    0.79 
 -10  13  -2    0.42    0.70 
  10 -13   2    0.22    0.76 
 -11  13  -2   -0.06    0.63 
  11 -13   2    0.44    0.83 
 -12  13  -2    1.13    0.79 
  12 -13   2    0.16    0.86 
 -13  13  -2    0.36    0.75 
  13 -13   2    0.01    0.76 
 -14  13  -2   -0.70    0.53 
  14 -13   2   -0.87    0.77 
 -15  13  -2    0.22    0.73 
  15 -13   2    0.42    0.92 
 -16  13  -2    0.39    0.73 
  16 -13   2   -0.53    0.81 
   6  12  -2    3.50    1.10 
  -6 -12   2    2.14    0.89 
   5  12  -2    1.30    0.79 
  -5 -12   2   -0.17    0.58 
   4  12  -2   -1.05    0.67 
  -4 -12   2   -0.21    0.60 
   3  12  -2    0.27    0.71 
  -3 -12   2    0.34    0.63 
   2  12  -2    1.08    0.64 
  -2 -12   2    0.86    0.56 
  -2 -12   2    0.72    0.68 
   1  12  -2    0.25    0.62 
   1  12  -2    0.56    0.61 
  -1 -12   2    0.72    0.55 
   0  12  -2    6.96    0.97 
   0  12  -2    5.31    1.12 
   0 -12   2    7.22    1.00 
  -1  12  -2    3.87    0.73 
  -1  12  -2    3.46    0.93 
   1 -12   2    3.89    0.80 
  -2  12  -2   -0.34    0.40 
  -2  12  -2   -0.25    0.63 
   2 -12   2   -0.36    0.57 
  -3  12  -2    4.36    0.94 
  -3  12  -2    4.86    0.66 
   3 -12   2    5.49    0.92 
  -4  12  -2    0.55    0.35 
  -4  12  -2    0.14    0.56 
   4 -12   2    0.83    0.66 
  -5  12  -2    2.41    0.38 
  -5  12  -2    1.90    0.69 
   5 -12   2    2.05    0.77 
  -6  12  -2    0.52    0.54 
   6 -12   2    0.59    0.19 
   6 -12   2   -0.25    0.65 
  -7  12  -2    2.36    0.71 
   7 -12   2    1.82    0.82 
  -8  12  -2    0.61    0.61 
   8 -12   2    2.54    0.90 
  -9  12  -2    0.67    0.68 
   9 -12   2    0.21    0.76 
 -10  12  -2    0.77    0.58 
  10 -12   2   -0.80    0.75 
 -11  12  -2    1.33    0.75 
  11 -12   2    2.93    0.96 
 -12  12  -2   -0.24    0.64 
  12 -12   2    0.25    0.73 
 -13  12  -2    3.63    1.04 
  13 -12   2    4.56    1.14 
 -14  12  -2    5.93    1.25 
  14 -12   2    6.84    1.26 
 -15  12  -2   -0.13    0.66 
  15 -12   2    1.02    0.90 
 -16  12  -2    0.10    0.73 
  16 -12   2   -0.02    0.90 
 -17  12  -2    0.87    0.87 
  17 -12   2    0.29    0.99 
   7  11  -2    0.61    0.93 
  -7 -11   2    1.22    0.80 
   6  11  -2   -0.71    0.75 
  -6 -11   2   -1.64    0.45 
   5  11  -2   -0.64    0.68 
  -5 -11   2    0.66    0.65 
   4  11  -2    1.36    0.69 
  -4 -11   2    1.28    0.67 
   3  11  -2    0.96    0.64 
  -3 -11   2    1.46    0.55 
  -3 -11   2    2.25    0.84 
   2  11  -2    0.38    0.56 
  -2 -11   2    1.65    0.61 
  -2 -11   2    1.09    0.72 
   1  11  -2    1.84    0.66 
   1  11  -2   -0.10    0.71 
  -1 -11   2    1.20    0.58 
   0  11  -2    9.20    1.04 
   0  11  -2    9.62    1.25 
   0 -11   2    8.11    1.01 
  -1  11  -2    1.63    0.54 
  -1  11  -2    2.28    0.75 
   1 -11   2    1.71    0.62 
  -2  11  -2    3.05    0.77 
  -2  11  -2    4.11    0.61 
   2 -11   2    3.62    0.74 
  -3  11  -2   -0.13    0.47 
  -3  11  -2    0.67    0.35 
   3 -11   2   -0.48    0.52 
  -4  11  -2    0.30    0.52 
  -4  11  -2    0.37    0.28 
   4 -11   2    2.09    0.65 
  -5  11  -2    1.17    0.27 
  -5  11  -2    1.86    0.67 
   5 -11   2    1.09    0.65 
  -6  11  -2    0.00    0.52 
   6 -11   2   -0.44    0.58 
  -7  11  -2    1.06    0.63 
   7 -11   2   -0.13    0.64 
  -8  11  -2    1.01    0.57 
   8 -11   2    1.49    0.71 
  -9  11  -2    2.63    0.75 
   9 -11   2    1.34    0.81 
 -10  11  -2    1.40    0.70 
  10 -11   2    0.82    0.78 
 -11  11  -2    2.52    0.79 
  11 -11   2    6.39    1.14 
 -12  11  -2   32.40    2.59 
  12 -11   2   34.56    2.60 
 -13  11  -2    2.94    0.87 
  13 -11   2    3.00    1.03 
 -14  11  -2    0.13    0.63 
  14 -11   2    1.05    0.87 
 -15  11  -2   -0.64    0.55 
  15 -11   2    0.79    0.86 
 -16  11  -2   -0.68    0.69 
  16 -11   2    0.72    0.99 
 -17  11  -2    0.76    0.86 
  17 -11   2   -0.46    0.90 
   8  10  -2    0.91    0.89 
  -8 -10   2    1.47    0.81 
   7  10  -2   -0.34    0.76 
  -7 -10   2    0.32    0.63 
   6  10  -2    0.32    0.73 
  -6 -10   2    0.06    0.64 
   5  10  -2   -0.19    0.70 
  -5 -10   2   -0.24    0.60 
   4  10  -2    1.14    0.77 
  -4 -10   2    2.48    0.58 
  -4 -10   2    2.78    0.77 
   3  10  -2    1.51    0.67 
  -3 -10   2    1.92    0.56 
  -3 -10   2    2.24    0.71 
   2  10  -2    9.78    1.14 
  -2 -10   2   10.47    1.04 
   1  10  -2   -0.12    0.66 
   1  10  -2    0.43    0.57 
  -1 -10   2    0.27    0.50 
   0  10  -2   16.48    1.62 
   0  10  -2   17.17    1.34 
   0 -10   2   14.14    1.28 
  -1  10  -2    1.61    0.62 
  -1  10  -2    1.86    0.50 
   1 -10   2    1.95    0.58 
  -2  10  -2    1.36    0.42 
  -2  10  -2    1.40    0.58 
   2 -10   2    0.62    0.51 
  -3  10  -2    7.97    0.71 
  -3  10  -2    9.45    1.10 
   3 -10   2    7.75    0.97 
  -4  10  -2   11.13    0.81 
  -4  10  -2   11.58    1.25 
   4 -10   2   12.17    1.21 
  -5  10  -2    0.96    0.50 
  -5  10  -2    1.46    0.24 
   5 -10   2    2.14    0.67 
  -6  10  -2    4.42    0.81 
   6 -10   2    4.57    0.81 
  -7  10  -2    0.86    0.52 
   7 -10   2    0.51    0.68 
  -8  10  -2    7.65    1.06 
   8 -10   2    6.66    1.05 
  -9  10  -2   -0.72    0.51 
   9 -10   2   -0.56    0.51 
 -10  10  -2    0.46    0.65 
  10 -10   2    0.90    0.73 
 -11  10  -2    1.09    0.71 
  11 -10   2    0.15    0.70 
 -12  10  -2    5.56    1.07 
  12 -10   2    6.37    1.17 
 -13  10  -2    5.88    1.12 
  13 -10   2    6.70    1.17 
 -14  10  -2    2.14    0.88 
  14 -10   2    2.51    0.91 
 -15  10  -2    0.03    0.64 
  15 -10   2   -1.03    0.78 
 -16  10  -2    1.09    0.83 
  16 -10   2   -0.25    0.80 
 -17  10  -2   -0.72    0.65 
  17 -10   2    0.20    0.90 
   9   9  -2    0.62    0.90 
  -9  -9   2    0.69    0.79 
   8   9  -2   -0.10    0.72 
  -8  -9   2    0.72    0.67 
   7   9  -2   -0.15    0.73 
  -7  -9   2    0.69    0.66 
   6   9  -2    0.84    0.66 
  -6  -9   2    1.23    0.76 
   5   9  -2    1.89    0.73 
  -5  -9   2    2.51    0.84 
   4   9  -2    1.00    0.60 
  -4  -9   2    1.29    0.70 
   3   9  -2   10.90    1.21 
  -3  -9   2   10.91    1.33 
   2   9  -2    0.09    0.55 
   2   9  -2    0.22    0.46 
   1   9  -2    1.77    0.50 
   1   9  -2    2.52    0.67 
  -1  -9   2    1.97    0.51 
   0   9  -2    2.80    0.72 
   0   9  -2    1.33    0.46 
   0  -9   2    1.50    0.49 
  -1   9  -2    0.57    0.47 
  -1   9  -2   -0.59    0.27 
   1  -9   2   -0.35    0.38 
  -2   9  -2    8.10    0.72 
  -2   9  -2    6.42    0.87 
   2  -9   2    7.67    0.87 
  -3   9  -2    6.64    0.62 
  -3   9  -2    7.45    0.93 
   3  -9   2    8.29    0.93 
  -4   9  -2   12.24    1.10 
  -4   9  -2   11.47    0.78 
   4  -9   2   11.62    1.16 
  -5   9  -2   -0.10    0.38 
   5  -9   2    0.24    0.54 
  -6   9  -2    2.70    0.60 
   6  -9   2    2.25    0.71 
  -7   9  -2    5.55    0.86 
   7  -9   2    7.98    1.04 
  -8   9  -2    5.57    0.87 
   8  -9   2    5.50    0.93 
  -9   9  -2    4.57    0.86 
   9  -9   2    4.85    0.89 
 -10   9  -2    1.23    0.62 
 -10   9  -2    1.20    0.20 
  10  -9   2    0.40    0.63 
 -11   9  -2    1.23    0.72 
  11  -9   2    4.40    0.93 
 -12   9  -2   -0.01    0.59 
  12  -9   2   -0.54    0.27 
  12  -9   2    0.31    0.74 
 -13   9  -2    0.03    0.58 
  13  -9   2    0.90    0.75 
 -14   9  -2    0.71    0.71 
  14  -9   2   -0.32    0.77 
 -15   9  -2   -0.33    0.58 
  15  -9   2   -0.10    0.79 
 -16   9  -2   -0.22    0.69 
  16  -9   2    0.53    0.87 
 -17   9  -2    0.43    0.73 
  17  -9   2   -0.14    0.84 
  10   8  -2   -0.26    0.82 
 -10  -8   2    0.15    0.74 
   9   8  -2    2.74    0.99 
  -9  -8   2    0.84    0.82 
   8   8  -2   -0.56    0.64 
  -8  -8   2    0.52    0.73 
   7   8  -2    0.45    0.67 
  -7  -8   2    0.93    0.74 
   6   8  -2   -0.55    0.61 
  -6  -8   2   -0.73    0.53 
   5   8  -2   -0.08    0.33 
   5   8  -2   -0.22    0.61 
  -5  -8   2    0.25    0.62 
   4   8  -2    1.42    0.61 
   4   8  -2    1.18    0.40 
  -4  -8   2    0.77    0.61 
   3   8  -2    1.63    0.59 
   3   8  -2    1.48    0.42 
  -3  -8   2    1.56    0.60 
   2   8  -2    2.89    0.64 
   2   8  -2    1.88    0.64 
   2   8  -2    2.85    0.47 
   1   8  -2    1.16    0.56 
   1   8  -2    1.57    0.46 
  -1  -8   2    2.15    0.47 
   0   8  -2    5.81    0.86 
   0   8  -2    5.27    0.68 
   0  -8   2    5.56    0.68 
  -1   8  -2    1.78    0.53 
  -1   8  -2    2.38    0.43 
   1  -8   2    1.18    0.47 
  -2   8  -2    2.37    0.39 
  -2   8  -2    2.28    0.61 
   2  -8   2    2.88    0.59 
  -3   8  -2    0.13    0.22 
  -3   8  -2    0.16    0.38 
   3  -8   2   -0.20    0.45 
  -4   8  -2    1.93    0.24 
  -4   8  -2    1.81    0.51 
   4  -8   2    2.18    0.56 
  -5   8  -2   13.12    1.13 
   5  -8   2   12.61    1.24 
  -6   8  -2    0.42    0.48 
   6  -8   2   -0.21    0.47 
  -7   8  -2    5.86    0.87 
   7  -8   2    6.74    0.94 
  -8   8  -2   76.39    4.62 
   8  -8   2   78.17    4.60 
  -9   8  -2    0.92    0.21 
  -9   8  -2    1.48    0.60 
   9  -8   2    1.19    0.68 
 -10   8  -2    4.34    0.88 
  10  -8   2    3.15    0.82 
  10  -8   2    3.70    0.43 
 -11   8  -2    0.23    0.61 
  11  -8   2    0.22    0.68 
  11  -8   2    0.99    0.32 
 -12   8  -2   -0.36    0.59 
  12  -8   2   -1.25    0.60 
  12  -8   2    0.10    0.30 
 -13   8  -2   -0.43    0.64 
  13  -8   2    1.19    0.39 
  13  -8   2    2.37    0.88 
 -14   8  -2    2.15    0.80 
  14  -8   2   -0.67    0.75 
  14  -8   2    0.63    0.40 
 -15   8  -2    1.81    0.81 
  15  -8   2    0.69    0.81 
 -16   8  -2    0.41    0.72 
  16  -8   2    0.53    0.82 
 -17   8  -2   -0.43    0.70 
  17  -8   2   -0.67    0.79 
  11   7  -2   -0.51    0.69 
 -11  -7   2    0.70    0.83 
  10   7  -2    5.38    1.12 
 -10  -7   2    5.66    1.24 
   9   7  -2    1.66    0.82 
  -9  -7   2   -0.49    0.71 
   8   7  -2   -0.21    0.64 
  -8  -7   2    0.69    0.70 
   7   7  -2    1.02    0.67 
  -7  -7   2    1.11    0.71 
   6   7  -2    0.95    0.68 
   6   7  -2   -0.07    0.28 
  -6  -7   2    0.09    0.54 
   5   7  -2    0.26    0.29 
   5   7  -2    0.53    0.61 
  -5  -7   2    0.73    0.61 
   4   7  -2    0.73    0.33 
   4   7  -2    1.02    0.53 
  -4  -7   2    0.28    0.53 
   3   7  -2   15.52    1.38 
   3   7  -2   16.74    1.12 
  -3  -7   2   16.02    1.42 
   2   7  -2    4.33    0.67 
   2   7  -2    2.79    0.46 
   2   7  -2    2.89    0.63 
   1   7  -2   -0.40    0.36 
   1   7  -2   -0.22    0.38 
   0   7  -2    3.77    0.54 
   0   7  -2    3.95    0.66 
   0  -7   2    5.62    0.64 
  -1   7  -2    1.28    0.35 
  -1   7  -2    1.23    0.51 
   1  -7   2    1.00    0.43 
  -2   7  -2   -0.17    0.24 
  -2   7  -2   -0.28    0.40 
   2  -7   2   -0.49    0.41 
  -3   7  -2    1.06    0.44 
  -3   7  -2    1.37    0.25 
   3  -7   2    1.59    0.53 
  -4   7  -2    8.76    0.90 
  -4   7  -2    6.67    0.44 
   4  -7   2    7.48    0.82 
   4  -7   2    7.37    0.52 
  -5   7  -2   10.23    1.04 
   5  -7   2   11.39    1.06 
  -6   7  -2    8.98    0.96 
   6  -7   2    7.15    0.89 
  -7   7  -2    0.36    0.13 
  -7   7  -2    0.42    0.43 
   7  -7   2    0.20    0.51 
  -8   7  -2  173.26   10.02 
   8  -7   2  180.33    9.69 
   8  -7   2  183.95   10.00 
  -9   7  -2   22.59    1.75 
   9  -7   2   23.24    1.44 
   9  -7   2   24.80    1.83 
 -10   7  -2    2.17    0.76 
  10  -7   2    5.77    0.91 
  10  -7   2    3.62    0.46 
 -11   7  -2    0.22    0.59 
  11  -7   2    0.11    0.63 
  11  -7   2   -0.02    0.29 
 -12   7  -2    0.09    0.54 
  12  -7   2   -0.24    0.31 
  12  -7   2   -0.52    0.62 
 -13   7  -2    2.99    0.89 
  13  -7   2    0.99    0.44 
  13  -7   2    0.55    0.73 
 -14   7  -2    1.88    0.83 
  14  -7   2    2.98    0.61 
  14  -7   2    2.38    0.92 
 -15   7  -2   -0.71    0.63 
  15  -7   2    0.03    0.44 
  15  -7   2   -0.47    0.66 
 -16   7  -2   -0.74    0.65 
  16  -7   2   -0.20    0.47 
  16  -7   2   -0.89    0.68 
  11   6  -2    0.14    0.77 
 -11  -6   2   -0.75    0.58 
  10   6  -2    1.71    0.87 
 -10  -6   2   -0.13    0.79 
   9   6  -2    1.15    0.72 
  -9  -6   2    2.36    0.83 
   8   6  -2    1.71    0.71 
  -8  -6   2    1.85    0.76 
   7   6  -2    2.45    0.75 
  -7  -6   2    0.68    0.71 
   6   6  -2    8.10    0.65 
   6   6  -2    7.32    1.01 
  -6  -6   2    6.99    1.06 
   5   6  -2    1.59    0.34 
   5   6  -2    1.30    0.58 
  -5  -6   2    1.67    0.67 
   4   6  -2    2.50    0.38 
   4   6  -2    3.07    0.63 
  -4  -6   2    2.44    0.63 
   3   6  -2   -0.18    0.22 
   3   6  -2    0.17    0.38 
  -3  -6   2   -0.29    0.44 
   2   6  -2   28.74    1.84 
   2   6  -2   26.56    1.69 
   2   6  -2   29.78    1.94 
   1   6  -2   17.00    1.22 
   1   6  -2   17.39    1.34 
   0   6  -2    0.21    0.30 
   0   6  -2    0.15    0.41 
   0  -6   2   -0.06    0.32 
  -1   6  -2    1.81    0.33 
  -1   6  -2    2.11    0.47 
   1  -6   2    2.10    0.46 
  -2   6  -2    0.47    0.36 
  -2   6  -2    0.87    0.23 
   2  -6   2    0.95    0.44 
  -3   6  -2    2.58    0.53 
  -3   6  -2    2.74    0.26 
   3  -6   2    2.81    0.53 
  -4   6  -2   -0.16    0.36 
   4  -6   2   -0.02    0.38 
  -5   6  -2    8.18    0.90 
   5  -6   2    9.34    0.93 
  -6   6  -2    0.21    0.13 
  -6   6  -2   -0.42    0.34 
   6  -6   2    0.56    0.48 
  -7   6  -2    1.92    0.56 
   7  -6   2    1.32    0.25 
   7  -6   2    3.09    0.66 
  -8   6  -2    4.10    0.77 
   8  -6   2    4.56    0.79 
   8  -6   2    4.06    0.45 
  -9   6  -2   11.05    1.22 
   9  -6   2   10.54    1.16 
   9  -6   2   10.06    0.81 
 -10   6  -2    2.21    0.72 
  10  -6   2    2.12    0.41 
  10  -6   2    2.15    0.70 
 -11   6  -2    0.87    0.62 
  11  -6   2    0.53    0.35 
  11  -6   2    0.95    0.70 
 -12   6  -2    1.38    0.73 
  12  -6   2    1.86    0.74 
  12  -6   2    1.01    0.43 
 -13   6  -2    0.48    0.64 
  13  -6   2    0.39    0.72 
  13  -6   2    0.59    0.45 
 -14   6  -2    2.47    0.87 
  14  -6   2   -0.22    0.64 
  14  -6   2    1.26    0.54 
 -15   6  -2    1.31    0.74 
  15  -6   2   -0.07    0.72 
  15  -6   2    2.01    0.65 
 -16   6  -2   -0.17    0.70 
  16  -6   2   -1.17    0.67 
  16  -6   2    1.42    0.65 
  12   5  -2    1.50    0.83 
 -12  -5   2    1.89    0.98 
  11   5  -2    1.43    0.87 
 -11  -5   2   -0.60    0.68 
  10   5  -2    0.82    0.69 
 -10  -5   2    2.27    0.94 
   9   5  -2   -0.20    0.63 
  -9  -5   2   -0.16    0.70 
   8   5  -2    1.47    0.69 
  -8  -5   2    1.79    0.75 
   7   5  -2    5.97    0.54 
   7   5  -2    6.72    1.02 
  -7  -5   2    5.11    0.99 
   6   5  -2    1.97    0.31 
   6   5  -2    1.72    0.62 
  -6  -5   2    2.04    0.66 
   5   5  -2    1.23    0.50 
   5   5  -2    0.22    0.22 
  -5  -5   2   -0.05    0.51 
   4   5  -2    0.26    0.22 
   4   5  -2    0.44    0.42 
  -4  -5   2    0.87    0.48 
   3   5  -2   27.82    1.75 
   3   5  -2   26.04    1.51 
  -3  -5   2   21.91    1.73 
   2   5  -2   69.93    4.20 
   2   5  -2   74.88    4.16 
   2   5  -2   73.07    4.02 
   1   5  -2    2.35    0.42 
   1   5  -2    2.31    0.53 
  -1  -5   2    2.67    0.40 
   0   5  -2    2.50    0.51 
   0   5  -2    1.48    0.35 
   0  -5   2    2.06    0.38 
  -1   5  -2    0.95    0.25 
  -1   5  -2    1.28    0.44 
   1  -5   2    1.20    0.38 
  -2   5  -2    5.41    0.43 
  -2   5  -2    4.47    0.56 
   2  -5   2    6.12    0.62 
  -3   5  -2   92.01    5.24 
  -3   5  -2   92.11    5.05 
   3  -5   2   91.33    5.23 
   3  -5   2   98.80    5.07 
  -4   5  -2    2.50    0.47 
  -4   5  -2    2.50    0.23 
  -4   5  -2    2.82    0.22 
   4  -5   2    3.18    0.55 
  -5   5  -2   57.81    3.14 
  -5   5  -2   56.89    3.36 
   5  -5   2   56.84    3.37 
  -6   5  -2   24.44    1.65 
   6  -5   2   23.25    1.41 
   6  -5   2   24.05    1.66 
  -7   5  -2   26.81    1.88 
   7  -5   2   27.87    1.66 
   7  -5   2   28.05    1.91 
  -8   5  -2   10.50    1.16 
   8  -5   2   10.80    1.08 
   8  -5   2   11.04    0.84 
  -9   5  -2    0.04    0.49 
   9  -5   2   -0.11    0.29 
   9  -5   2   -0.38    0.48 
 -10   5  -2    0.12    0.49 
  10  -5   2   -0.10    0.54 
  10  -5   2    0.01    0.32 
 -11   5  -2    0.01    0.57 
  11  -5   2    0.60    0.41 
  11  -5   2   -0.76    0.51 
 -12   5  -2    0.55    0.58 
  12  -5   2   -0.94    0.38 
  12  -5   2    0.09    0.58 
 -13   5  -2    0.11    0.64 
  13  -5   2    0.05    0.58 
  13  -5   2    0.20    0.45 
 -14   5  -2    2.19    0.78 
  14  -5   2    2.08    0.80 
  14  -5   2    3.84    0.77 
 -15   5  -2    0.04    0.66 
  15  -5   2    0.16    0.65 
  15  -5   2   -0.08    0.54 
 -16   5  -2   -0.18    0.70 
  16  -5   2    0.10    0.77 
  16  -5   2    0.72    0.65 
  13   4  -2    0.04    0.86 
 -13  -4   2    0.21    0.85 
  12   4  -2    0.37    0.75 
 -12  -4   2   -0.32    0.75 
  11   4  -2    1.40    0.77 
 -11  -4   2    2.14    0.96 
  10   4  -2    7.32    1.17 
 -10  -4   2    5.79    1.15 
  -9  -4   2    9.40    1.38 
   8   4  -2    1.32    0.31 
   8   4  -2    1.85    0.68 
  -8  -4   2    1.96    0.78 
   7   4  -2   12.95    0.84 
   7   4  -2   11.67    1.27 
  -7  -4   2   12.39    1.35 
   6   4  -2    4.47    0.40 
   6   4  -2    3.43    0.72 
  -6  -4   2    1.68    0.65 
   5   4  -2    2.07    0.29 
   5   4  -2    2.32    0.58 
  -5  -4   2    2.80    0.65 
   4   4  -2   33.25    1.91 
   4   4  -2   33.40    2.15 
  -4  -4   2   35.28    2.23 
   3   4  -2   46.61    2.58 
   3   4  -2   48.17    2.79 
  -3  -4   2   44.19    2.82 
   2   4  -2   -0.26    0.28 
   2   4  -2    0.09    0.18 
  -2  -4   2    0.36    0.40 
   1   4  -2    6.62    0.63 
   1   4  -2    5.81    0.66 
  -1  -4   2    7.18    0.56 
   0   4  -2   30.34    1.80 
   0   4  -2   31.48    1.89 
   0  -4   2   30.75    1.79 
  -1   4  -2    5.95    0.47 
  -1   4  -2    5.04    0.57 
   1  -4   2    6.25    0.57 
  -2   4  -2   27.17    1.55 
  -2   4  -2   28.86    1.70 
   2  -4   2   27.56    1.71 
  -3   4  -2    1.69    0.18 
  -3   4  -2    2.05    0.41 
   3  -4   2    1.48    0.38 
  -4   4  -2  592.74   31.03 
  -4   4  -2  571.32   31.11 
   4  -4   2  570.77   31.10 
  -5   4  -2   65.02    3.81 
   5  -4   2   66.03    3.82 
   5  -4   2   67.35    3.66 
  -6   4  -2   32.30    2.15 
   6  -4   2   35.35    2.13 
   6  -4   2   34.00    1.98 
  -7   4  -2   11.43    1.10 
   7  -4   2    9.92    1.01 
   7  -4   2    9.99    0.82 
  -8   4  -2    7.81    0.92 
   8  -4   2    6.38    0.82 
   8  -4   2    5.99    0.65 
  -9   4  -2    8.48    1.06 
   9  -4   2    7.91    0.97 
   9  -4   2    7.85    0.80 
 -10   4  -2    0.69    0.57 
  10  -4   2    1.01    0.55 
  10  -4   2    0.09    0.38 
 -11   4  -2    2.83    0.80 
  11  -4   2    3.17    0.72 
  11  -4   2    2.68    0.62 
 -12   4  -2    1.19    0.68 
  12  -4   2    2.01    0.71 
  12  -4   2    2.58    0.66 
 -13   4  -2    0.25    0.63 
  13  -4   2    0.52    0.62 
  13  -4   2   -0.26    0.49 
 -14   4  -2    2.71    0.92 
  14  -4   2    0.11    0.63 
  14  -4   2    2.98    0.77 
 -15   4  -2   -0.37    0.62 
  15  -4   2   -1.02    0.60 
  15  -4   2   -0.05    0.56 
 -16   4  -2    0.94    0.83 
  16  -4   2    0.28    0.70 
  13   3  -2   -0.06    0.78 
 -13  -3   2    0.97    0.80 
  12   3  -2    1.79    0.87 
 -12  -3   2   -0.18    0.72 
  11   3  -2   11.62    1.37 
 -11  -3   2    7.61    1.37 
  10   3  -2    1.81    0.73 
 -10  -3   2    2.82    0.95 
   9   3  -2   -0.10    0.54 
  -9  -3   2   -0.49    0.64 
   8   3  -2    1.70    0.31 
   8   3  -2    0.75    0.58 
  -8  -3   2    1.54    0.70 
   7   3  -2    0.01    0.20 
   7   3  -2    0.08    0.46 
  -7  -3   2   -0.22    0.52 
   6   3  -2    9.85    1.06 
   6   3  -2   10.01    0.67 
  -6  -3   2   10.17    1.11 
   5   3  -2    0.79    0.45 
   5   3  -2    0.45    0.18 
  -5  -3   2    0.94    0.50 
   4   3  -2    1.96    0.46 
   4   3  -2    2.09    0.24 
  -4  -3   2    2.73    0.59 
   3   3  -2    0.50    0.34 
   3   3  -2    0.55    0.16 
  -3  -3   2    0.40    0.44 
   2   3  -2    9.35    0.81 
  -2  -3   2   10.17    0.83 
   1   3  -2    7.24    0.59 
   1   3  -2    6.48    0.64 
  -1  -3   2    6.79    0.52 
   0   3  -2   19.04    1.24 
   0   3  -2   20.05    1.19 
   0  -3   2   19.87    1.18 
  -1   3  -2   24.83    1.57 
  -1   3  -2   27.89    1.51 
   1  -3   2   27.21    1.58 
  -2   3  -2    0.05    0.13 
  -2   3  -2    0.33    0.27 
   2  -3   2   -0.39    0.30 
  -3   3  -2   11.73    0.71 
  -3   3  -2   11.72    0.83 
   3  -3   2    9.05    0.91 
  -4   3  -2  206.84   11.27 
   4  -3   2  208.40   11.18 
   4  -3   2  206.52   11.28 
  -5   3  -2    5.35    0.65 
   5  -3   2    4.91    0.49 
   5  -3   2    4.75    0.66 
  -6   3  -2   11.37    0.95 
   6  -3   2    9.02    0.90 
   6  -3   2    9.46    0.78 
  -7   3  -2    4.42    0.70 
   7  -3   2    4.46    0.54 
   7  -3   2    3.79    0.65 
  -8   3  -2    0.86    0.48 
   8  -3   2   -0.27    0.31 
   8  -3   2    0.06    0.43 
  -9   3  -2    2.65    0.66 
   9  -3   2    2.65    0.55 
   9  -3   2    2.02    0.55 
 -10   3  -2    0.22    0.47 
  10  -3   2   -0.72    0.45 
  10  -3   2    0.08    0.43 
 -11   3  -2    0.39    0.59 
  11  -3   2    0.61    0.51 
  11  -3   2   -0.26    0.45 
 -12   3  -2    2.34    0.79 
  12  -3   2    1.31    0.62 
  12  -3   2    2.02    0.69 
 -13   3  -2    0.40    0.65 
  13  -3   2    0.74    0.60 
  13  -3   2   -0.05    0.53 
 -14   3  -2    2.43    0.90 
  14  -3   2    1.23    0.70 
  14  -3   2   -0.12    0.65 
 -15   3  -2    0.93    0.79 
  15  -3   2    0.22    0.67 
  14   2  -2    0.88    0.87 
 -14  -2   2    1.23    0.84 
  13   2  -2   -0.97    0.67 
 -13  -2   2    1.64    0.87 
  12   2  -2    4.28    0.99 
 -12  -2   2    2.89    1.00 
  11   2  -2   -0.24    0.64 
 -11  -2   2    0.12    0.63 
  10   2  -2    0.32    0.65 
 -10  -2   2    0.68    0.70 
   9   2  -2    0.73    0.30 
   9   2  -2    0.32    0.61 
  -9  -2   2    1.89    0.70 
   8   2  -2   10.80    1.17 
   8   2  -2   12.18    0.83 
  -8  -2   2   10.86    1.30 
   7   2  -2    2.15    0.31 
   7   2  -2    1.79    0.53 
  -7  -2   2    1.43    0.63 
   6   2  -2    1.69    0.48 
   6   2  -2    1.46    0.25 
  -6  -2   2    1.44    0.53 
   5   2  -2    0.29    0.35 
   5   2  -2    0.75    0.18 
  -5  -2   2    0.94    0.47 
   4   2  -2    1.14    0.16 
   4   2  -2    0.64    0.39 
  -4  -2   2    0.83    0.20 
  -4  -2   2    1.56    0.44 
   3   2  -2   -0.32    0.27 
  -3  -2   2    0.01    0.32 
   2   2  -2   -0.06    0.25 
  -2  -2   2    0.40    0.36 
   1   2  -2    0.26    0.24 
   1   2  -2   -0.18    0.13 
   1   2  -2    0.07    0.24 
  -1  -2   2   -0.12    0.14 
   0   2  -2  109.74    5.91 
   0   2  -2  107.98    5.94 
   0  -2   2  109.92    5.91 
  -1   2  -2    8.79    0.56 
  -1   2  -2    8.85    0.59 
   1  -2   2    8.48    0.65 
  -2   2  -2    0.63    0.18 
  -2   2  -2    0.42    0.24 
   2  -2   2    1.74    0.40 
  -3   2  -2  135.81    7.55 
   3  -2   2  142.06    7.57 
   3  -2   2  137.01    7.50 
   4  -2   2    1.26    0.29 
   4  -2   2    0.93    0.37 
  -5   2  -2   40.99    2.42 
   5  -2   2   40.33    2.44 
   5  -2   2   39.92    2.37 
  -6   2  -2   17.17    1.26 
   6  -2   2   17.66    1.26 
   6  -2   2   16.60    1.19 
  -7   2  -2    5.36    0.74 
   7  -2   2    3.79    0.59 
   7  -2   2    5.13    0.65 
  -8   2  -2    8.58    0.94 
   8  -2   2    6.68    0.83 
   8  -2   2    8.84    0.91 
  -9   2  -2    7.61    0.98 
   9  -2   2    7.17    0.85 
   9  -2   2    7.88    0.92 
 -10   2  -2    1.93    0.68 
  10  -2   2    3.13    0.66 
  10  -2   2    1.86    0.57 
 -11   2  -2    3.98    0.87 
  11  -2   2    4.78    0.86 
  11  -2   2    4.32    0.77 
 -12   2  -2    0.49    0.62 
  12  -2   2    1.23    0.67 
  12  -2   2    0.53    0.54 
 -13   2  -2    2.84    0.88 
  13  -2   2    2.04    0.71 
  13  -2   2    2.71    0.74 
 -14   2  -2    0.31    0.65 
  14  -2   2   -0.20    0.67 
 -15   2  -2    0.14    0.68 
  15  -2   2    0.02    0.68 
  14   1  -2    2.78    0.98 
 -14  -1   2    1.01    0.83 
  13   1  -2    1.67    0.74 
 -13  -1   2    1.07    0.85 
  12   1  -2    0.26    0.60 
 -12  -1   2    1.50    0.80 
  11   1  -2    0.32    0.63 
 -11  -1   2   -0.07    0.66 
  10   1  -2    3.69    0.49 
  10   1  -2    2.64    0.77 
 -10  -1   2    3.39    0.90 
   9   1  -2    1.34    0.60 
   9   1  -2    0.41    0.29 
  -9  -1   2    0.12    0.60 
   8   1  -2    1.95    0.35 
  -8  -1   2    0.39    0.58 
   7   1  -2   -0.52    0.33 
   7   1  -2    0.01    0.22 
  -7  -1   2    0.60    0.48 
   6   1  -2   -0.31    0.33 
   6   1  -2    0.29    0.21 
  -6  -1   2    0.48    0.50 
   5   1  -2    1.39    0.41 
   5   1  -2    2.64    0.28 
  -5  -1   2    2.80    0.56 
   4   1  -2   11.71    0.95 
   4   1  -2   12.25    0.75 
  -4  -1   2   14.25    1.01 
   3   1  -2    5.65    0.58 
   3   1  -2    5.83    0.37 
   3   1  -2    5.96    0.38 
  -3  -1   2    5.83    0.65 
   2   1  -2    7.91    0.60 
  -2  -1   2    7.26    0.62 
   1   1  -2    0.36    0.21 
   1   1  -2    0.89    0.14 
  -1  -1   2    0.55    0.23 
  -1  -1   2    0.83    0.14 
   0   1  -2    4.72    0.36 
   0   1  -2    5.81    0.39 
   0  -1   2    5.26    0.40 
  -1   1  -2    0.07    0.14 
  -1   1  -2    0.32    0.14 
   1  -1   2    0.05    0.19 
   1  -1   2    0.52    0.16 
  -2   1  -2   48.99    2.70 
   2  -1   2   48.82    2.72 
   2  -1   2   48.46    2.75 
  -3   1  -2    4.56    0.46 
   3  -1   2    2.52    0.36 
   3  -1   2    3.03    0.44 
  -4   1  -2    2.55    0.43 
   4  -1   2    1.00    0.34 
   4  -1   2    0.76    0.35 
  -5   1  -2    0.29    0.33 
   5  -1   2   -0.11    0.32 
   5  -1   2    0.50    0.34 
  -6   1  -2    7.33    0.84 
   6  -1   2    8.25    0.82 
   6  -1   2    8.45    0.83 
  -7   1  -2    2.64    0.56 
   7  -1   2    2.60    0.50 
   7  -1   2    2.59    0.53 
  -8   1  -2    1.93    0.57 
   8  -1   2    2.19    0.54 
   8  -1   2    2.39    0.59 
  -9   1  -2    1.27    0.55 
   9  -1   2    0.88    0.57 
   9  -1   2   -0.17    0.42 
 -10   1  -2    4.82    0.88 
  10  -1   2    3.43    0.72 
  10  -1   2    4.66    0.74 
 -11   1  -2    2.11    0.78 
  11  -1   2    2.04    0.61 
  11  -1   2    2.93    0.73 
 -12   1  -2    0.50    0.62 
  12  -1   2   -0.65    0.47 
  12  -1   2   -0.21    0.53 
 -13   1  -2    1.27    0.74 
  13  -1   2    2.58    0.68 
  13  -1   2    0.42    0.77 
 -14   1  -2    2.59    0.87 
  14  -1   2    1.76    0.81 
  15   0  -2    5.15    1.10 
 -15   0   2    4.76    1.17 
  14   0  -2   -0.30    0.61 
 -14   0   2    0.42    0.79 
  13   0  -2   -0.17    0.62 
 -13   0   2   -0.74    0.64 
  12   0  -2    0.59    0.63 
 -12   0   2    0.54    0.64 
  11   0  -2   -0.46    0.55 
  11   0  -2    0.30    0.35 
 -11   0   2   -0.52    0.58 
  10   0  -2    4.04    0.75 
  10   0  -2    4.56    0.57 
 -10   0   2    4.09    0.92 
   9   0  -2    4.81    0.56 
   9   0  -2    5.10    0.76 
  -9   0   2    4.96    0.92 
   8   0  -2    4.53    0.51 
   8   0  -2    4.44    0.69 
  -8   0   2    6.91    0.92 
   7   0  -2   26.47    1.68 
   7   0  -2   23.12    1.50 
  -7   0   2   25.94    1.79 
   6   0  -2   -0.05    0.32 
   6   0  -2    0.16    0.25 
  -6   0   2    0.25    0.43 
   5   0  -2   14.38    0.93 
   5   0  -2   14.00    1.04 
  -5   0   2   15.95    1.16 
   4   0  -2   62.70    3.65 
   4   0  -2   66.98    3.57 
   3   0  -2   16.89    1.00 
   3   0  -2   15.38    0.91 
  -3   0   2   12.08    1.11 
   2   0  -2   64.85    3.52 
  -2   0   2   61.61    3.47 
  -2   0   2   65.15    3.55 
   1   0  -2   22.89    1.39 
  -1   0   2   23.88    1.38 
  -1   0   2   26.55    1.39 
   0   0  -2    6.45    0.45 
   0   0   2    6.18    0.48 
  -1   0  -2   26.54    1.46 
   1   0   2   27.31    1.56 
   1   0   2   26.17    1.46 
   1   0   2   26.29    1.53 
  -2   0  -2   11.58    0.77 
   2   0   2   11.79    0.84 
   2   0   2   12.01    0.85 
  -3   0  -2   29.28    1.73 
   3   0   2   29.94    1.76 
   3   0   2   28.12    1.76 
  -4   0  -2    1.14    0.37 
   4   0   2    1.16    0.36 
   4   0   2    1.75    0.39 
  -5   0  -2    0.37    0.37 
   5   0   2    0.98    0.39 
   5   0   2    0.84    0.36 
  -6   0  -2    2.83    0.55 
   6   0   2    3.40    0.57 
   6   0   2    2.01    0.49 
  -7   0  -2    2.08    0.57 
   7   0   2    2.83    0.52 
   7   0   2    2.65    0.57 
  -8   0  -2    4.77    0.78 
   8   0   2    5.36    0.69 
   8   0   2    4.39    0.74 
  -9   0  -2    4.39    0.80 
   9   0   2    3.86    0.76 
   9   0   2    3.63    0.67 
 -10   0  -2    1.92    0.67 
  10   0   2    1.47    0.55 
  10   0   2    1.34    0.63 
 -11   0  -2    0.61    0.65 
  11   0   2    0.86    0.54 
  11   0   2    2.41    0.75 
 -12   0  -2   -0.66    0.54 
  12   0   2    0.69    0.62 
  12   0   2   -0.44    0.46 
 -13   0  -2    0.68    0.71 
  13   0   2   -0.32    0.70 
 -14   0  -2    0.89    0.80 
  14   0   2    1.61    0.82 
  15  -1  -2    0.24    0.69 
 -15   1   2   -0.99    0.69 
  14  -1  -2    1.65    0.75 
 -14   1   2    0.07    0.78 
  13  -1  -2    3.02    0.83 
 -13   1   2    1.41    0.75 
  12  -1  -2    0.17    0.61 
  12  -1  -2    0.37    0.41 
 -12   1   2    0.77    0.66 
  11  -1  -2   -0.38    0.49 
  11  -1  -2    0.20    0.38 
 -11   1   2    0.46    0.66 
  10  -1  -2    0.31    0.36 
  10  -1  -2    2.11    0.62 
 -10   1   2    0.48    0.58 
   9  -1  -2    3.57    0.52 
   9  -1  -2    3.32    0.60 
  -9   1   2    3.34    0.70 
   8  -1  -2   -0.39    0.29 
   8  -1  -2   -0.71    0.34 
  -8   1   2    0.25    0.44 
   7  -1  -2    0.27    0.36 
   7  -1  -2    0.90    0.33 
  -7   1   2    0.95    0.52 
   6  -1  -2   17.24    1.13 
   6  -1  -2   16.82    1.20 
  -6   1   2   16.82    1.28 
   5  -1  -2    0.68    0.29 
   5  -1  -2    0.70    0.30 
  -5   1   2    1.69    0.45 
   4  -1  -2  109.78    6.12 
   4  -1  -2  109.22    6.09 
  -4   1   2  117.09    6.20 
   3  -1  -2  147.75    8.08 
  -3   1   2  151.06    8.08 
  -3   1   2  148.88    8.13 
   2  -1  -2  205.50   10.95 
  -2   1   2  201.00   10.96 
  -2   1   2  203.53   10.97 
   1  -1  -2   29.66    1.72 
  -1   1   2   30.85    1.75 
  -1   1   2   30.81    1.70 
   0  -1  -2  278.79   15.15 
   0  -1  -2  286.59   15.22 
   0   1   2  279.65   15.23 
   0   1   2  286.27   15.15 
  -1  -1  -2   28.99    1.56 
   1   1   2   25.14    1.62 
   1   1   2   27.62    1.63 
  -2  -1  -2    7.76    0.61 
   2   1   2    9.84    0.72 
   2   1   2    7.10    0.65 
  -3  -1  -2    0.37    0.30 
   3   1   2    1.27    0.35 
   3   1   2    0.18    0.36 
  -4  -1  -2    0.44    0.35 
   4   1   2   -0.34    0.34 
   4   1   2    0.34    0.31 
  -5  -1  -2    7.79    0.84 
   5   1   2    7.66    0.76 
   5   1   2    6.90    0.79 
  -6  -1  -2   11.18    1.07 
   6   1   2    9.43    0.90 
   6   1   2   10.10    1.05 
  -7  -1  -2    0.02    0.40 
   7   1   2    0.32    0.36 
   7   1   2   -0.11    0.44 
  -8  -1  -2    0.75    0.52 
   8   1   2   -0.23    0.48 
   8   1   2    0.06    0.39 
  -9  -1  -2    8.10    1.13 
   9   1   2    8.98    1.16 
   9   1   2    8.75    0.94 
 -10  -1  -2    9.00    1.23 
  10   1   2    9.29    1.18 
  10   1   2   10.69    1.09 
 -11  -1  -2    1.87    0.78 
  11   1   2    2.39    0.63 
  11   1   2    2.75    0.81 
 -12  -1  -2   -0.74    0.56 
  12   1   2   -0.96    0.67 
 -13  -1  -2    1.89    0.84 
  13   1   2   -0.07    0.78 
  16  -2  -2   -0.25    0.66 
 -16   2   2    0.93    0.91 
  15  -2  -2   -0.70    0.60 
 -15   2   2   -0.08    0.70 
  14  -2  -2   -0.07    0.58 
 -14   2   2    0.46    0.79 
  13  -2  -2    0.38    0.47 
  13  -2  -2    0.72    0.58 
 -13   2   2   -0.02    0.61 
  12  -2  -2    1.29    0.51 
  12  -2  -2    1.30    0.62 
 -12   2   2    0.05    0.63 
  11  -2  -2   -0.79    0.40 
  11  -2  -2   -0.30    0.45 
 -11   2   2   -0.11    0.53 
  10  -2  -2    5.07    0.68 
  10  -2  -2    4.79    0.75 
 -10   2   2    4.60    0.89 
   9  -2  -2    0.02    0.36 
   9  -2  -2    0.17    0.36 
  -9   2   2   -0.44    0.46 
   8  -2  -2    6.56    0.74 
   8  -2  -2    8.03    0.75 
  -8   2   2    7.53    0.96 
   7  -2  -2   10.01    0.86 
   7  -2  -2    9.66    0.85 
  -7   2   2   10.45    1.13 
   6  -2  -2   14.59    1.04 
   6  -2  -2   13.43    1.01 
  -6   2   2   15.49    1.17 
   5  -2  -2    0.13    0.25 
   5  -2  -2    0.21    0.29 
  -5   2   2    0.78    0.43 
   4  -2  -2   13.75    0.90 
   4  -2  -2   14.48    0.97 
  -4   2   2   13.56    1.02 
   3  -2  -2  239.15   12.79 
  -3   2   2  242.01   12.84 
  -3   2   2  231.91   12.85 
   2  -2  -2   28.19    1.60 
  -2   2   2   27.36    1.67 
  -2   2   2   28.42    1.64 
   1  -2  -2   26.13    1.50 
  -1   2   2   25.12    1.56 
  -1   2   2   25.46    1.48 
   0   2   2    1.31    0.24 
   0   2   2    1.45    0.28 
   0   2   2    0.98    0.32 
   1   2   2  102.85    5.72 
   1   2   2  103.53    5.72 
   1   2   2  104.69    5.66 
  -2  -2  -2   55.03    3.17 
   2   2   2   58.26    3.24 
   2   2   2   55.05    3.19 
  -3  -2  -2   30.86    1.94 
   3   2   2   33.11    1.95 
   3   2   2   32.10    2.02 
  -4  -2  -2   39.29    2.38 
   4   2   2   39.76    2.43 
   4   2   2   38.37    2.34 
  -5  -2  -2    1.27    0.46 
   5   2   2    1.58    0.41 
   5   2   2    1.14    0.46 
  -6  -2  -2    0.15    0.44 
   6   2   2   -0.15    0.44 
   6   2   2    0.35    0.36 
  -7  -2  -2   -0.45    0.43 
   7   2   2   -0.14    0.34 
   7   2   2    0.02    0.49 
  -8  -2  -2    3.99    0.80 
   8   2   2    2.22    0.75 
   8   2   2    4.00    0.67 
  -9  -2  -2    0.64    0.60 
   9   2   2    1.33    0.65 
   9   2   2   -0.02    0.41 
 -10  -2  -2    1.27    0.71 
  10   2   2    1.15    0.54 
  10   2   2    4.12    0.93 
 -11  -2  -2   -0.01    0.57 
  11   2   2    0.78    0.78 
 -12  -2  -2    0.78    0.73 
  12   2   2    0.90    0.78 
 -13  -2  -2    0.22    0.76 
  13   2   2   -0.08    0.82 
  16  -3  -2    0.32    0.70 
 -16   3   2    1.05    0.91 
  15  -3  -2    1.88    0.75 
 -15   3   2    1.91    0.98 
  14  -3  -2    0.29    0.53 
  14  -3  -2    0.27    0.56 
 -14   3   2    1.14    0.82 
  13  -3  -2    0.27    0.56 
  13  -3  -2   -0.24    0.48 
 -13   3   2    0.02    0.64 
  12  -3  -2   -0.14    0.48 
  12  -3  -2    0.35    0.49 
 -12   3   2   -0.69    0.57 
  11  -3  -2    1.12    0.53 
  11  -3  -2    1.36    0.54 
 -11   3   2    0.91    0.67 
  10  -3  -2    0.05    0.37 
  10  -3  -2    0.88    0.45 
 -10   3   2    0.23    0.51 
   9  -3  -2    0.96    0.42 
   9  -3  -2    0.72    0.36 
  -9   3   2    0.75    0.50 
   8  -3  -2   -0.10    0.35 
   8  -3  -2    0.32    0.30 
  -8   3   2   -0.42    0.36 
   7  -3  -2   -0.08    0.37 
   7  -3  -2    0.76    0.32 
  -7   3   2    0.83    0.48 
   6  -3  -2    3.40    0.43 
   6  -3  -2    3.80    0.53 
  -6   3   2    4.16    0.68 
   5  -3  -2    7.90    0.64 
   5  -3  -2    7.47    0.74 
  -5   3   2    9.79    0.91 
   4  -3  -2    1.92    0.29 
  -4   3   2    1.69    0.40 
  -4   3   2    3.76    0.52 
   3  -3  -2    2.28    0.29 
  -3   3   2    2.20    0.41 
  -3   3   2    1.91    0.42 
   2  -3  -2   20.02    1.20 
  -2   3   2   19.71    1.24 
  -2   3   2   19.74    1.29 
   1  -3  -2   45.38    2.57 
  -1   3   2   46.28    2.56 
  -1   3   2   43.80    2.61 
   0   3   2    0.32    0.27 
   0   3   2    0.69    0.27 
   0   3   2    1.00    0.33 
   1   3   2   -0.33    0.27 
   1   3   2    0.48    0.28 
   1   3   2   -0.62    0.29 
  -2  -3  -2    7.61    0.71 
   2   3   2    7.64    0.74 
   2   3   2    7.62    0.78 
  -3  -3  -2   19.40    1.37 
   3   3   2   22.62    1.47 
   3   3   2   19.78    1.37 
  -4  -3  -2    1.22    0.44 
   4   3   2    0.95    0.38 
   4   3   2    0.73    0.44 
  -5  -3  -2   -0.07    0.38 
   5   3   2    0.91    0.38 
   5   3   2    0.12    0.42 
  -6  -3  -2    1.76    0.60 
   6   3   2    2.34    0.62 
   6   3   2    3.04    0.54 
  -7  -3  -2    0.06    0.53 
   7   3   2   -0.31    0.37 
   7   3   2   -0.23    0.50 
  -8  -3  -2    2.60    0.73 
   8   3   2    4.34    0.68 
   8   3   2    2.59    0.76 
  -9  -3  -2    1.93    0.76 
   9   3   2    0.02    0.69 
   9   3   2    1.68    0.56 
 -10  -3  -2    0.61    0.61 
  10   3   2    2.34    0.89 
  10   3   2    1.01    0.54 
 -11  -3  -2    0.87    0.70 
  11   3   2    0.03    0.74 
 -12  -3  -2    0.85    0.76 
  12   3   2    1.48    0.92 
  16  -4  -2   -0.80    0.55 
 -16   4   2    0.52    0.82 
  15  -4  -2    0.25    0.58 
 -15   4   2    0.80    0.84 
  14  -4  -2    0.62    0.63 
  14  -4  -2    0.28    0.51 
 -14   4   2   -0.73    0.57 
  13  -4  -2    0.35    0.47 
  13  -4  -2    0.01    0.53 
 -13   4   2    0.88    0.68 
  12  -4  -2    1.35    0.61 
  12  -4  -2    1.08    0.50 
 -12   4   2    2.39    0.78 
  11  -4  -2    0.00    0.50 
  11  -4  -2    0.03    0.37 
 -11   4   2    0.35    0.52 
  10  -4  -2    0.05    0.40 
  10  -4  -2   -0.01    0.31 
 -10   4   2    0.01    0.48 
   9  -4  -2    2.33    0.53 
   9  -4  -2    3.01    0.47 
  -9   4   2    2.55    0.66 
   8  -4  -2    2.73    0.45 
   8  -4  -2    2.75    0.55 
  -8   4   2    3.02    0.65 
   7  -4  -2    5.64    0.70 
   7  -4  -2    4.67    0.51 
  -7   4   2    4.27    0.71 
   6  -4  -2   10.71    0.94 
   6  -4  -2   10.39    0.77 
  -6   4   2   11.89    1.03 
   5  -4  -2   -0.49    0.37 
   5  -4  -2    0.11    0.21 
  -5   4   2   -0.16    0.35 
   4  -4  -2    0.29    0.21 
  -4   4   2    0.52    0.37 
  -4   4   2    0.02    0.30 
   3  -4  -2    0.18    0.19 
  -3   4   2    0.09    0.28 
  -3   4   2    0.34    0.33 
   2  -4  -2    3.17    0.39 
  -2   4   2    3.56    0.49 
  -2   4   2    3.33    0.45 
  -1   4   2   37.65    2.25 
  -1   4   2   39.58    2.27 
  -1   4   2   38.86    2.32 
   0   4   2    3.23    0.45 
   0   4   2    3.44    0.50 
   0   4   2    2.91    0.45 
   1   4   2    0.13    0.29 
   1   4   2    0.43    0.36 
   1   4   2    0.45    0.33 
  -2  -4  -2    0.92    0.37 
   2   4   2    1.16    0.42 
   2   4   2    1.61    0.42 
  -3  -4  -2    3.85    0.60 
   3   4   2    3.35    0.59 
   3   4   2    4.01    0.58 
  -4  -4  -2    1.69    0.50 
   4   4   2    0.95    0.41 
   4   4   2    2.21    0.59 
  -5  -4  -2    1.42    0.52 
   5   4   2    1.30    0.46 
   5   4   2    1.29    0.55 
  -6  -4  -2   10.42    1.14 
   6   4   2    8.48    1.08 
   6   4   2   10.65    1.00 
  -7  -4  -2   11.85    1.33 
   7   4   2   11.40    1.32 
   7   4   2   12.02    1.15 
  -8  -4  -2    3.72    0.83 
   8   4   2    2.48    0.79 
   8   4   2    3.16    0.65 
  -9  -4  -2    0.18    0.60 
   9   4   2    0.79    0.79 
   9   4   2   -0.24    0.45 
 -10  -4  -2    1.33    0.73 
  10   4   2    0.55    0.80 
 -11  -4  -2    1.67    0.82 
  11   4   2    3.13    1.01 
 -12  -4  -2    0.49    0.69 
  12   4   2    0.70    0.90 
  17  -5  -2    0.54    0.65 
 -17   5   2    0.01    0.83 
  16  -5  -2    2.60    0.76 
 -16   5   2    2.29    0.99 
  15  -5  -2    0.49    0.52 
  15  -5  -2    0.31    0.69 
 -15   5   2   -0.45    0.72 
  14  -5  -2    6.05    0.96 
  14  -5  -2    4.62    0.78 
 -14   5   2    4.99    1.11 
  13  -5  -2    0.87    0.52 
  13  -5  -2    0.74    0.62 
 -13   5   2    1.49    0.79 
  12  -5  -2   -0.21    0.52 
  12  -5  -2   -0.33    0.36 
 -12   5   2    0.23    0.65 
  11  -5  -2    0.85    0.40 
  11  -5  -2    0.45    0.52 
 -11   5   2    0.18    0.62 
  10  -5  -2    2.91    0.65 
  10  -5  -2    3.40    0.50 
 -10   5   2    2.84    0.72 
   9  -5  -2    0.85    0.52 
   9  -5  -2    2.13    0.39 
  -9   5   2    1.69    0.62 
   8  -5  -2    3.12    0.59 
   8  -5  -2    2.88    0.41 
  -8   5   2    2.56    0.62 
   7  -5  -2    4.73    0.67 
   7  -5  -2    4.40    0.46 
  -7   5   2    5.16    0.79 
   6  -5  -2    0.71    0.23 
   6  -5  -2    0.71    0.44 
  -6   5   2    0.82    0.43 
   5  -5  -2    2.24    0.29 
  -5   5   2    2.00    0.50 
  -5   5   2    1.51    0.51 
   4  -5  -2    6.70    0.54 
  -4   5   2    6.31    0.75 
  -4   5   2    7.06    0.77 
   3  -5  -2    2.25    0.33 
  -3   5   2    2.11    0.42 
  -3   5   2    2.29    0.52 
   2  -5  -2    2.65    0.41 
  -2   5   2    2.95    0.54 
  -2   5   2    3.16    0.47 
  -1   5   2    1.85    0.43 
  -1   5   2    2.40    0.50 
  -1   5   2    2.79    0.44 
   0   5   2   97.40    5.36 
   0   5   2   93.31    5.34 
   0   5   2   95.63    5.38 
   1   5   2   14.81    1.18 
   1   5   2   15.18    1.13 
   1   5   2   15.83    1.16 
  -2  -5  -2    6.18    0.73 
   2   5   2    6.55    0.79 
   2   5   2    5.76    0.72 
  -3  -5  -2    9.32    0.91 
   3   5   2    9.51    0.91 
   3   5   2   11.26    1.11 
  -4  -5  -2   -0.10    0.38 
   4   5   2   -0.32    0.42 
   4   5   2    0.17    0.38 
  -5  -5  -2   -0.37    0.43 
   5   5   2    0.21    0.42 
   5   5   2   -0.50    0.47 
  -6  -5  -2    4.93    0.84 
   6   5   2    2.93    0.79 
   6   5   2    4.98    0.75 
  -7  -5  -2    0.11    0.54 
   7   5   2   -0.27    0.41 
   7   5   2   -0.25    0.54 
  -8  -5  -2   -0.35    0.53 
   8   5   2   -0.11    0.62 
   8   5   2    0.38    0.46 
  -9  -5  -2    1.32    0.75 
   9   5   2    2.82    0.85 
 -10  -5  -2    0.93    0.66 
  10   5   2    0.94    0.86 
 -11  -5  -2    2.16    0.86 
  11   5   2    3.96    1.15 
  17  -6  -2   -0.44    0.54 
 -17   6   2   -0.28    0.74 
  16  -6  -2    1.03    0.61 
  16  -6  -2    0.56    0.71 
 -16   6   2   -0.57    0.63 
  15  -6  -2    0.30    0.48 
  15  -6  -2    0.03    0.70 
 -15   6   2    0.00    0.64 
  14  -6  -2   -0.65    0.59 
  14  -6  -2    0.03    0.40 
 -14   6   2   -0.83    0.54 
  13  -6  -2    0.53    0.41 
  13  -6  -2    0.70    0.65 
 -13   6   2    0.85    0.75 
  12  -6  -2    0.00    0.35 
  12  -6  -2   -0.11    0.53 
 -12   6   2    0.17    0.65 
  11  -6  -2    1.34    0.39 
  11  -6  -2    1.28    0.62 
 -11   6   2    0.39    0.58 
  10  -6  -2    0.24    0.52 
  10  -6  -2    0.19    0.28 
 -10   6   2    0.74    0.61 
   9  -6  -2    4.61    0.51 
   9  -6  -2    5.29    0.75 
  -9   6   2    4.03    0.82 
   8  -6  -2    6.99    0.61 
   8  -6  -2    7.42    0.88 
  -8   6   2    7.16    0.94 
   7  -6  -2    2.41    0.60 
   7  -6  -2    1.71    0.28 
  -7   6   2    1.72    0.54 
   6  -6  -2    7.01    0.54 
   6  -6  -2    6.40    0.82 
  -6   6   2    6.66    0.86 
   5  -6  -2   14.32    0.94 
  -5   6   2   14.05    1.20 
  -5   6   2   16.70    1.23 
   4  -6  -2    3.82    0.39 
  -4   6   2    2.21    0.50 
  -4   6   2    2.15    0.52 
   3  -6  -2    1.55    0.34 
  -3   6   2    1.36    0.44 
  -3   6   2    1.27    0.46 
  -2   6   2    4.02    0.61 
  -2   6   2    4.08    0.66 
  -2   6   2    4.13    0.51 
  -1   6   2    0.48    0.36 
  -1   6   2    0.74    0.35 
  -1   6   2    0.77    0.43 
   0   6   2    1.33    0.42 
   0   6   2    0.63    0.39 
   0   6   2    1.04    0.45 
   1   6   2    0.34    0.37 
   1   6   2    0.22    0.39 
   1   6   2    0.56    0.43 
  -2  -6  -2    0.70    0.43 
   2   6   2    2.02    0.52 
   2   6   2    2.25    0.53 
  -3  -6  -2    3.40    0.66 
   3   6   2    2.35    0.57 
   3   6   2    4.11    0.72 
  -4  -6  -2    7.32    0.98 
   4   6   2    7.82    0.90 
   4   6   2    7.77    1.06 
  -5  -6  -2   13.28    1.40 
   5   6   2   15.40    1.26 
   5   6   2   13.06    1.41 
  -6  -6  -2   -0.24    0.51 
   6   6   2   -0.14    0.42 
   6   6   2    0.10    0.65 
  -7  -6  -2    0.04    0.55 
   7   6   2   -0.55    0.63 
   7   6   2    1.21    0.53 
  -8  -6  -2    0.16    0.63 
   8   6   2    0.64    0.75 
  -9  -6  -2    0.30    0.70 
   9   6   2   -0.14    0.68 
 -10  -6  -2    0.31    0.69 
  10   6   2    0.11    0.76 
  17  -7  -2   -0.37    0.76 
 -17   7   2   -0.80    0.72 
  16  -7  -2   -1.18    0.68 
 -16   7   2   -0.21    0.79 
  15  -7  -2    2.94    0.61 
  15  -7  -2    3.17    0.88 
 -15   7   2    1.66    0.83 
  14  -7  -2    3.85    0.62 
  14  -7  -2    2.83    0.89 
 -14   7   2    2.88    1.01 
  13  -7  -2   -0.24    0.35 
  13  -7  -2    0.09    0.60 
 -13   7   2   -0.35    0.68 
  12  -7  -2   -0.07    0.32 
  12  -7  -2    0.63    0.59 
 -12   7   2    0.10    0.59 
  11  -7  -2    3.28    0.80 
  11  -7  -2    4.07    0.52 
 -11   7   2    3.47    0.83 
  10  -7  -2    2.19    0.37 
  10  -7  -2    2.57    0.71 
 -10   7   2    1.42    0.65 
   9  -7  -2    1.71    0.32 
   9  -7  -2    1.46    0.61 
  -9   7   2    1.91    0.61 
   8  -7  -2    2.33    0.62 
   8  -7  -2    2.04    0.30 
  -8   7   2    1.26    0.60 
   7  -7  -2   15.95    1.26 
   7  -7  -2   14.47    0.93 
  -7   7   2   15.80    1.32 
   6  -7  -2    0.78    0.55 
   6  -7  -2    0.86    0.24 
  -6   7   2    1.53    0.53 
   5  -7  -2    5.70    0.55 
  -5   7   2    8.50    0.89 
  -5   7   2    7.58    0.89 
   4  -7  -2    1.13    0.30 
  -4   7   2    1.06    0.43 
  -4   7   2    1.55    0.55 
   3  -7  -2    5.93    0.60 
  -3   7   2    5.60    0.78 
  -3   7   2    5.52    0.73 
  -2   7   2   -0.29    0.27 
  -2   7   2    0.66    0.42 
  -2   7   2    0.33    0.45 
  -1   7   2   17.19    1.38 
  -1   7   2   18.30    1.34 
  -1   7   2   17.61    1.30 
   0   7   2   12.57    1.10 
   0   7   2   11.90    1.05 
   0   7   2   10.96    1.04 
   1   7   2    0.83    0.46 
   1   7   2   -0.33    0.37 
   1   7   2    1.04    0.46 
  -2  -7  -2    0.94    0.46 
   2   7   2   -0.08    0.41 
   2   7   2    0.11    0.41 
  -3  -7  -2    5.38    0.84 
   3   7   2    5.62    0.82 
   3   7   2    6.02    0.94 
  -4  -7  -2   -0.11    0.49 
   4   7   2    0.51    0.49 
   4   7   2    0.53    0.64 
  -5  -7  -2    8.77    1.12 
   5   7   2    9.74    1.07 
   5   7   2    8.34    1.20 
  -6  -7  -2   -0.45    0.49 
   6   7   2   -0.54    0.55 
   6   7   2    0.14    0.45 
  -7  -7  -2   -0.46    0.52 
   7   7   2   -0.48    0.61 
   7   7   2    0.90    0.53 
  -8  -7  -2    2.31    0.81 
   8   7   2    1.07    0.80 
  -9  -7  -2    0.09    0.69 
   9   7   2   -0.36    0.80 
  17  -8  -2   -0.17    0.85 
 -17   8   2   -0.06    0.71 
  16  -8  -2    0.07    0.71 
 -16   8   2   -0.51    0.63 
  15  -8  -2    0.33    0.73 
 -15   8   2    1.99    0.91 
  14  -8  -2    0.38    0.44 
  14  -8  -2    0.42    0.68 
 -14   8   2    0.41    0.77 
  13  -8  -2    0.62    0.35 
  13  -8  -2   -0.36    0.62 
 -13   8   2    1.00    0.68 
  12  -8  -2    1.26    0.70 
  12  -8  -2    3.13    0.45 
 -12   8   2    1.60    0.76 
  11  -8  -2    0.90    0.67 
  11  -8  -2   -0.02    0.25 
 -11   8   2    0.19    0.63 
  10  -8  -2    2.08    0.34 
  10  -8  -2    2.65    0.74 
 -10   8   2    1.61    0.64 
   9  -8  -2    0.91    0.25 
  -9   8   2   -0.32    0.53 
   8  -8  -2    0.44    0.21 
   8  -8  -2    0.88    0.60 
  -8   8   2    1.35    0.61 
   7  -8  -2   27.18    1.97 
   7  -8  -2   26.76    1.59 
  -7   8   2   30.23    2.00 
   6  -8  -2    0.56    0.53 
   6  -8  -2   -0.45    0.18 
  -6   8   2    0.11    0.44 
   5  -8  -2    0.07    0.23 
  -5   8   2    1.30    0.54 
  -5   8   2    0.13    0.39 
   4  -8  -2   10.89    0.83 
  -4   8   2   12.22    1.10 
  -4   8   2    8.27    0.96 
   3  -8  -2    0.42    0.31 
  -3   8   2   -0.21    0.41 
  -3   8   2    0.99    0.47 
  -2   8   2    4.97    0.59 
  -2   8   2    2.48    0.62 
  -2   8   2    2.73    0.60 
  -1   8   2   20.13    1.42 
  -1   8   2   18.39    1.46 
  -1   8   2   18.60    1.51 
   0   8   2   26.61    1.86 
   0   8   2   24.93    1.83 
   0   8   2   26.64    1.84 
   1   8   2    0.74    0.56 
   1   8   2    0.20    0.48 
   1   8   2    0.83    0.49 
  -2  -8  -2   12.04    1.16 
   2   8   2   11.98    1.17 
   2   8   2   12.37    1.28 
  -3  -8  -2   -0.14    0.46 
   3   8   2    0.32    0.50 
   3   8   2    0.05    0.54 
  -4  -8  -2    1.46    0.62 
   4   8   2    1.06    0.72 
   4   8   2    0.85    0.56 
  -5  -8  -2    1.54    0.64 
   5   8   2    1.08    0.76 
   5   8   2    2.75    0.64 
  -6  -8  -2    1.66    0.69 
   6   8   2    1.23    0.79 
   6   8   2    2.87    0.67 
  -7  -8  -2    0.19    0.59 
   7   8   2   -1.20    0.71 
  -8  -8  -2   -1.10    0.52 
   8   8   2   -0.93    0.65 
  17  -9  -2    1.94    0.93 
 -17   9   2    0.58    0.87 
  16  -9  -2    0.59    0.80 
 -16   9   2   -1.05    0.60 
  15  -9  -2    1.01    0.78 
 -15   9   2    0.62    0.73 
  14  -9  -2    0.60    0.72 
 -14   9   2    1.72    0.86 
  13  -9  -2    3.26    0.83 
 -13   9   2    2.97    0.95 
  12  -9  -2    2.19    0.83 
 -12   9   2    3.28    0.92 
  11  -9  -2   -1.01    0.48 
  11  -9  -2   -0.05    0.21 
 -11   9   2    0.50    0.67 
  10  -9  -2    2.48    0.75 
  10  -9  -2    1.88    0.29 
 -10   9   2    2.18    0.75 
   9  -9  -2    0.01    0.18 
   9  -9  -2   -0.17    0.58 
  -9   9   2   -0.11    0.56 
   8  -9  -2    1.60    0.24 
   8  -9  -2    2.11    0.72 
  -8   9   2    0.49    0.51 
   7  -9  -2    2.53    0.32 
   7  -9  -2    3.82    0.80 
  -7   9   2    2.65    0.63 
   6  -9  -2   11.05    1.22 
   6  -9  -2   11.00    0.79 
  -6   9   2   12.37    1.23 
   5  -9  -2    1.31    0.33 
  -5   9   2    0.80    0.53 
  -5   9   2    0.23    0.48 
   4  -9  -2   18.51    1.26 
  -4   9   2   18.12    1.47 
  -4   9   2   18.12    1.45 
   3  -9  -2    0.25    0.32 
  -3   9   2    1.51    0.62 
  -3   9   2    0.75    0.52 
  -2   9   2    2.34    0.62 
  -2   9   2    0.74    0.53 
  -2   9   2    1.78    0.48 
  -1   9   2    0.12    0.50 
  -1   9   2    0.09    0.50 
  -1   9   2    0.64    0.43 
   0   9   2   11.05    1.19 
   0   9   2   13.12    1.16 
   0   9   2   10.84    1.21 
   1   9   2    2.59    0.70 
   1   9   2    4.13    0.77 
   1   9   2    4.01    0.78 
  -2  -9  -2    1.94    0.63 
   2   9   2    2.83    0.79 
   2   9   2    2.59    0.67 
  -3  -9  -2   -0.38    0.46 
   3   9   2    0.52    0.67 
   3   9   2   -0.31    0.47 
  -4  -9  -2    2.61    0.70 
   4   9   2    2.53    0.69 
   4   9   2    3.14    0.84 
  -5  -9  -2   -0.27    0.48 
   5   9   2    0.39    0.65 
   5   9   2    0.42    0.52 
  -6  -9  -2   -0.26    0.54 
   6   9   2    0.29    0.81 
  -7  -9  -2   -0.73    0.56 
   7   9   2   -1.06    0.75 
  17 -10  -2    0.16    0.79 
 -17  10   2    0.01    0.73 
  16 -10  -2    2.09    0.88 
 -16  10   2   -0.53    0.58 
  15 -10  -2    1.19    0.86 
 -15  10   2   -0.25    0.75 
  14 -10  -2    0.70    0.73 
 -14  10   2    0.82    0.74 
  13 -10  -2    1.60    0.81 
 -13  10   2    1.33    0.72 
  12 -10  -2   -0.07    0.70 
 -12  10   2    0.05    0.62 
  11 -10  -2   -0.37    0.60 
 -11  10   2   -0.14    0.52 
  10 -10  -2    2.44    0.72 
 -10  10   2    3.33    0.86 
   9 -10  -2    0.91    0.70 
   9 -10  -2    0.14    0.23 
  -9  10   2    0.37    0.54 
   8 -10  -2    0.24    0.57 
   8 -10  -2    0.36    0.19 
  -8  10   2    0.04    0.48 
   7 -10  -2    6.18    0.96 
   7 -10  -2    7.81    0.60 
  -7  10   2    7.90    1.00 
   6 -10  -2    8.84    0.73 
   6 -10  -2    8.56    1.12 
  -6  10   2    9.12    1.09 
   5 -10  -2    6.43    0.63 
  -5  10   2    4.27    0.81 
  -5  10   2    4.72    0.87 
   4 -10  -2    0.46    0.34 
  -4  10   2    0.61    0.53 
  -4  10   2    0.33    0.52 
   3 -10  -2    0.38    0.36 
  -3  10   2    1.09    0.61 
  -3  10   2   -0.06    0.56 
  -2  10   2    0.89    0.47 
  -2  10   2    1.00    0.64 
  -2  10   2    0.01    0.56 
  -1  10   2   29.56    2.04 
  -1  10   2   27.12    2.10 
  -1  10   2   30.32    2.13 
   0  10   2    5.76    0.94 
   0  10   2    6.54    1.01 
   0  10   2    7.01    0.97 
   1  10   2    0.97    0.59 
   1  10   2    2.43    0.73 
   1  10   2    0.90    0.64 
  -2 -10  -2    1.67    0.63 
   2  10   2    0.72    0.70 
   2  10   2    1.18    0.61 
  -3 -10  -2    1.57    0.63 
   3  10   2    1.49    0.62 
   3  10   2    1.57    0.75 
  -4 -10  -2    0.10    0.51 
   4  10   2   -1.00    0.56 
   4  10   2    0.35    0.51 
  -5 -10  -2    0.11    0.59 
   5  10   2    1.52    1.06 
   5  10   2    2.34    0.90 
  -6 -10  -2   -0.09    0.59 
   6  10   2    0.23    0.83 
  17 -11  -2    0.64    0.85 
 -17  11   2    0.51    0.78 
  16 -11  -2    2.56    0.99 
 -16  11   2    3.16    1.09 
  15 -11  -2    0.75    0.84 
 -15  11   2    1.40    0.83 
  14 -11  -2    0.80    0.79 
 -14  11   2    0.42    0.78 
  13 -11  -2    0.01    0.71 
 -13  11   2    0.98    0.74 
  12 -11  -2    1.16    0.84 
 -12  11   2    1.57    0.80 
  11 -11  -2   -0.09    0.72 
 -11  11   2    0.16    0.65 
  10 -11  -2    0.23    0.67 
 -10  11   2   -0.66    0.55 
   9 -11  -2    0.96    0.76 
  -9  11   2    0.95    0.60 
   8 -11  -2    0.58    0.68 
   8 -11  -2    0.20    0.34 
  -8  11   2    0.51    0.55 
   7 -11  -2    1.72    0.32 
   7 -11  -2    1.72    0.72 
  -7  11   2    2.32    0.68 
   6 -11  -2    0.03    0.28 
   6 -11  -2    0.07    0.57 
  -6  11   2   -0.03    0.52 
   5 -11  -2    1.50    0.42 
  -5  11   2    2.25    0.69 
  -5  11   2    1.28    0.71 
   4 -11  -2    1.93    0.47 
  -4  11   2    2.83    0.78 
  -4  11   2    1.19    0.69 
   3 -11  -2   12.91    1.12 
  -3  11   2   11.61    1.32 
  -3  11   2   11.21    1.27 
  -2  11   2    0.33    0.49 
  -2  11   2   -0.59    0.52 
  -2  11   2    0.00    0.61 
  -1  11   2    0.85    0.65 
  -1  11   2    0.12    0.53 
  -1  11   2   -0.50    0.58 
   0  11   2    0.31    0.59 
   0  11   2   -1.00    0.45 
   0  11   2   -0.47    0.52 
   1  11   2    2.42    0.79 
   1  11   2    2.64    0.79 
  -2 -11  -2    2.79    0.77 
   2  11   2    4.42    0.97 
  -3 -11  -2   -0.62    0.46 
   3  11   2   -0.30    0.56 
   3  11   2   -0.20    0.72 
  -4 -11  -2    1.72    0.67 
   4  11   2    0.40    0.57 
   4  11   2   -0.31    0.68 
  -5 -11  -2    0.63    0.61 
   5  11   2    1.59    0.90 
  17 -12  -2    1.40    0.93 
 -17  12   2    1.49    0.92 
  16 -12  -2    0.54    0.87 
 -16  12   2   -0.07    0.82 
  15 -12  -2    0.95    0.82 
 -15  12   2    0.61    0.88 
  14 -12  -2    1.06    0.86 
 -14  12   2   -0.32    0.75 
  13 -12  -2    0.16    0.79 
 -13  12   2    0.61    0.73 
  12 -12  -2    3.22    1.02 
 -12  12   2    1.63    0.85 
  11 -12  -2    1.40    0.83 
 -11  12   2    1.04    0.75 
  10 -12  -2   -1.20    0.55 
 -10  12   2    0.14    0.64 
   9 -12  -2    7.22    1.18 
  -9  12   2    6.36    1.09 
   8 -12  -2    1.92    0.89 
  -8  12   2    1.84    0.77 
   7 -12  -2    1.31    0.33 
   7 -12  -2    1.22    0.78 
  -7  12   2    1.17    0.69 
   6 -12  -2    0.67    0.74 
   6 -12  -2    1.11    0.38 
  -6  12   2    1.11    0.62 
   5 -12  -2   13.27    1.10 
   5 -12  -2   12.67    1.50 
  -5  12   2   14.46    1.53 
   4 -12  -2    3.09    0.56 
  -4  12   2    2.12    0.82 
  -4  12   2    1.77    0.73 
   3 -12  -2    0.46    0.46 
  -3  12   2    0.80    0.67 
  -3  12   2    0.30    0.65 
  -2  12   2    1.92    0.62 
  -2  12   2    1.45    0.71 
  -2  12   2    0.58    0.66 
  -1  12   2    0.15    0.56 
  -1  12   2   -0.35    0.63 
  -1  12   2    0.94    0.63 
   0  12   2    0.64    0.64 
   0  12   2   -0.18    0.62 
   0  12   2    0.75    0.63 
  -1 -12  -2    1.43    0.66 
   1  12   2    0.53    0.68 
   1  12   2    0.63    0.63 
  -2 -12  -2   -0.14    0.54 
   2  12   2    0.62    0.68 
   2  12   2    0.42    0.77 
  -3 -12  -2    0.04    0.56 
   3  12   2   -1.10    0.50 
   3  12   2   -0.04    0.79 
  -4 -12  -2    0.72    0.64 
   4  12   2    0.19    0.75 
  16 -13  -2    2.10    0.95 
 -16  13   2   -0.03    0.76 
  15 -13  -2    4.25    1.08 
 -15  13   2    0.78    0.93 
  14 -13  -2    0.16    0.84 
 -14  13   2    1.29    0.90 
  13 -13  -2    2.49    0.97 
 -13  13   2    1.07    0.85 
  12 -13  -2    1.96    0.83 
 -12  13   2    1.85    0.81 
  11 -13  -2    3.49    1.03 
 -11  13   2    1.82    0.83 
  10 -13  -2    1.02    0.80 
 -10  13   2    1.18    0.73 
   9 -13  -2    0.05    0.75 
  -9  13   2    0.32    0.67 
   8 -13  -2   -0.07    0.64 
  -8  13   2   -0.40    0.61 
   7 -13  -2    1.39    0.80 
  -7  13   2    0.48    0.67 
   6 -13  -2   -0.08    0.66 
   6 -13  -2    0.73    0.37 
  -6  13   2    0.05    0.63 
   5 -13  -2    2.61    0.54 
   5 -13  -2    3.28    0.91 
  -5  13   2    1.58    0.76 
   4 -13  -2    8.55    0.95 
  -4  13   2    9.16    1.29 
   3 -13  -2   -0.51    0.40 
  -3  13   2   -0.27    0.66 
  -3  13   2   -0.35    0.61 
  -2  13   2    5.97    0.90 
  -2  13   2    5.22    1.01 
  -2  13   2    5.88    1.08 
  -1  13   2   -0.38    0.60 
  -1  13   2   -0.10    0.66 
  -1  13   2   -0.71    0.54 
   0  13   2    1.41    0.76 
   0  13   2    1.63    0.75 
   0  13   2    1.50    0.78 
  -1 -13  -2    1.15    0.63 
   1  13   2    1.21    0.82 
   1  13   2   -0.18    0.63 
  -2 -13  -2    0.42    0.62 
   2  13   2   -0.80    0.75 
   2  13   2   -0.33    0.67 
  16 -14  -2    2.35    1.09 
 -16  14   2    0.48    0.83 
  15 -14  -2    0.80    0.93 
 -15  14   2    1.40    0.89 
  14 -14  -2    0.77    0.89 
 -14  14   2   -0.88    0.72 
  13 -14  -2   -0.97    0.78 
 -13  14   2    0.36    0.75 
  12 -14  -2    0.66    0.77 
 -12  14   2    0.17    0.72 
  11 -14  -2    2.74    0.98 
 -11  14   2    2.41    0.90 
  10 -14  -2    0.17    0.80 
 -10  14   2    0.51    0.72 
   9 -14  -2    0.41    0.77 
  -9  14   2    0.42    0.73 
   8 -14  -2    1.02    0.75 
  -8  14   2    0.36    0.64 
   7 -14  -2    0.81    0.80 
  -7  14   2   -0.37    0.65 
   6 -14  -2    0.18    0.77 
  -6  14   2    0.05    0.73 
   5 -14  -2    0.09    0.41 
   5 -14  -2   -0.53    0.65 
  -5  14   2    1.70    0.80 
   4 -14  -2    1.40    0.78 
   4 -14  -2    0.57    0.46 
  -4  14   2    1.44    0.85 
   3 -14  -2    6.49    0.89 
  -3  14   2    4.18    1.05 
   2 -14  -2    0.55    0.53 
  -2  14   2   -0.17    0.63 
  -2  14   2    1.71    0.86 
  -1  14   2   -0.21    0.65 
  -1  14   2    0.60    0.75 
  -1  14   2    0.27    0.80 
   0  14   2   -1.07    0.69 
   0  14   2   -0.58    0.69 
  -1 -14  -2    0.36    0.60 
   1  14   2    0.10    0.71 
   1  14   2   -0.40    0.69 
  15 -15  -2    0.24    0.91 
 -15  15   2   -1.00    0.73 
  14 -15  -2   -0.27    0.83 
 -14  15   2   -0.10    0.74 
  13 -15  -2    1.08    0.94 
 -13  15   2    0.44    0.77 
  12 -15  -2    1.53    0.93 
 -12  15   2    0.69    0.75 
  11 -15  -2    0.29    0.77 
 -11  15   2    2.85    0.96 
  10 -15  -2    7.33    1.27 
 -10  15   2    3.39    0.98 
   9 -15  -2    2.05    0.89 
  -9  15   2    0.81    0.76 
   8 -15  -2    0.87    0.87 
  -8  15   2    0.43    0.71 
   7 -15  -2   -0.15    0.67 
  -7  15   2   -0.16    0.74 
   6 -15  -2   -0.24    0.71 
  -6  15   2   -0.12    0.69 
   5 -15  -2   -0.09    0.74 
  -5  15   2   -0.87    0.63 
   4 -15  -2    0.06    0.72 
  -4  15   2   -0.27    0.80 
   3 -15  -2    0.49    0.46 
   3 -15  -2    0.33    0.76 
  -3  15   2   -0.18    0.77 
   2 -15  -2   -0.16    0.70 
   2 -15  -2   -0.42    0.49 
  -2  15   2    0.32    0.80 
   1 -15  -2    0.76    0.75 
  -1  15   2   -0.38    0.76 
  14 -16  -2   -0.10    0.93 
 -14  16   2   -0.15    0.82 
  13 -16  -2    4.19    1.28 
 -13  16   2    4.53    1.16 
  12 -16  -2    0.78    0.96 
 -12  16   2   -0.50    0.72 
  11 -16  -2   -0.17    0.86 
 -11  16   2   -0.02    0.78 
  10 -16  -2    5.25    1.21 
 -10  16   2    2.91    0.92 
   9 -16  -2   12.58    1.65 
  -9  16   2    9.41    1.47 
   8 -16  -2    3.23    1.05 
  -8  16   2    2.54    0.95 
   7 -16  -2    0.82    0.82 
  -7  16   2    0.24    0.70 
   6 -16  -2    2.77    0.98 
  -6  16   2    1.51    0.88 
   5 -16  -2    0.05    0.78 
  -5  16   2    0.97    0.92 
   4 -16  -2    1.88    0.81 
  -4  16   2    2.53    1.07 
   3 -16  -2    0.28    0.75 
  -3  16   2   -1.17    0.71 
  11 -17  -2    2.59    1.10 
 -11  17   2    2.18    1.02 
  10 -17  -2    0.02    0.87 
 -10  17   2   -1.32    0.67 
   9 -17  -2    0.56    0.93 
  -9  17   2   -0.54    0.79 
   8 -17  -2    1.89    1.01 
  -8  17   2    1.05    0.92 
   7 -17  -2   -1.23    0.77 
  -7  17   2    0.59    0.87 
   6 -17  -2    0.57    0.85 
  -6  17   2    1.11    0.96 
  -4  18  -3    2.22    1.14 
   4 -18   3    2.64    1.01 
  -5  18  -3    1.80    1.06 
   5 -18   3    2.24    0.96 
  -6  18  -3   -1.40    0.73 
   6 -18   3    0.56    0.88 
  -7  18  -3    2.82    1.04 
   7 -18   3    0.42    0.99 
  -8  18  -3   -0.36    0.76 
   8 -18   3   -0.26    0.87 
  -9  18  -3   -0.42    0.79 
   9 -18   3    0.83    1.01 
 -10  18  -3    3.86    1.14 
  10 -18   3    3.39    1.19 
 -11  18  -3    0.17    0.71 
  11 -18   3    2.20    1.08 
 -12  18  -3    0.07    0.76 
  12 -18   3    0.39    1.05 
  -1  17  -3    0.35    0.70 
  -2  17  -3   -0.04    0.87 
   2 -17   3    0.54    0.76 
  -3  17  -3    0.41    0.92 
   3 -17   3   -0.49    0.72 
  -4  17  -3    0.62    0.79 
   4 -17   3    0.43    0.82 
  -5  17  -3   -0.87    0.75 
   5 -17   3   -0.44    0.81 
  -6  17  -3   11.36    1.62 
   6 -17   3   12.93    1.62 
  -7  17  -3    0.61    0.73 
   7 -17   3    1.17    0.96 
  -8  17  -3   -0.56    0.62 
   8 -17   3    0.74    0.95 
  -9  17  -3    0.23    0.73 
   9 -17   3    0.06    0.92 
 -10  17  -3   -0.08    0.72 
  10 -17   3   -1.41    0.85 
 -11  17  -3   -0.51    0.62 
  11 -17   3    0.62    0.95 
 -12  17  -3    0.81    0.80 
  12 -17   3    1.41    1.05 
 -13  17  -3    0.68    0.84 
  13 -17   3    0.76    1.04 
 -14  17  -3    0.79    0.89 
  14 -17   3    1.40    1.06 
   0  16  -3   -0.46    0.78 
   0  16  -3    1.02    0.77 
  -1  16  -3    1.62    0.74 
  -1  16  -3   -0.42    0.84 
   1 -16   3   -0.06    0.64 
  -2  16  -3    2.10    0.69 
  -2  16  -3    2.17    1.03 
   2 -16   3    3.00    0.92 
  -3  16  -3    1.34    0.93 
  -3  16  -3    1.10    0.93 
   3 -16   3    0.81    0.79 
  -4  16  -3   -1.06    0.76 
   4 -16   3    0.81    0.76 
  -5  16  -3    3.43    1.05 
   5 -16   3    3.83    1.00 
  -6  16  -3    0.07    0.64 
   6 -16   3    0.17    0.83 
  -7  16  -3    0.30    0.77 
   7 -16   3   -1.13    0.78 
  -8  16  -3    1.67    0.87 
   8 -16   3    1.95    0.98 
  -9  16  -3    0.19    0.64 
   9 -16   3    0.45    0.88 
 -10  16  -3    0.44    0.80 
  10 -16   3    0.57    0.87 
 -11  16  -3    0.39    0.69 
  11 -16   3    2.36    1.06 
 -12  16  -3    1.90    0.82 
  12 -16   3    2.02    1.08 
 -13  16  -3    0.19    0.80 
  13 -16   3   -0.60    0.98 
 -14  16  -3    0.85    0.85 
  14 -16   3    0.88    0.96 
 -15  16  -3   -0.29    0.67 
  15 -16   3   -0.78    1.00 
   2  15  -3    0.02    0.76 
  -2 -15   3    2.48    0.88 
   1  15  -3    0.93    0.74 
  -1 -15   3    1.09    0.78 
   0  15  -3   -0.09    0.64 
   0  15  -3    0.48    0.74 
   0 -15   3    0.11    0.59 
  -1  15  -3    2.24    0.75 
  -1  15  -3    3.54    1.02 
   1 -15   3    2.79    0.81 
  -2  15  -3    1.02    0.86 
  -2  15  -3    0.11    0.53 
   2 -15   3    0.54    0.65 
  -3  15  -3    0.69    0.51 
  -3  15  -3   -0.79    0.55 
   3 -15   3    0.61    0.71 
  -4  15  -3    0.64    0.76 
  -4  15  -3    0.62    0.48 
   4 -15   3    1.61    0.80 
  -5  15  -3    1.58    0.80 
   5 -15   3    0.69    0.83 
  -6  15  -3    4.38    1.02 
   6 -15   3    4.20    1.07 
  -7  15  -3   -0.21    0.72 
   7 -15   3    2.80    0.99 
  -8  15  -3    0.43    0.69 
   8 -15   3   -0.86    0.79 
  -9  15  -3   -0.16    0.67 
   9 -15   3   -0.10    0.83 
 -10  15  -3    1.49    0.80 
  10 -15   3    1.89    0.87 
 -11  15  -3    0.87    0.82 
  11 -15   3    2.35    0.91 
 -12  15  -3   -0.70    0.73 
  12 -15   3    0.93    0.96 
 -13  15  -3   -0.21    0.62 
  13 -15   3    0.81    0.99 
 -14  15  -3   -0.35    0.70 
  14 -15   3    1.11    1.02 
 -15  15  -3    0.42    0.72 
  15 -15   3   -0.70    0.94 
   4  14  -3    1.48    0.94 
   3  14  -3    0.16    0.75 
  -3 -14   3    1.20    0.85 
   2  14  -3    0.53    0.72 
  -2 -14   3    0.40    0.75 
   1  14  -3    1.87    0.79 
   1  14  -3    1.88    0.90 
  -1 -14   3    1.47    0.67 
   0  14  -3    1.53    0.84 
   0  14  -3   -0.01    0.62 
   0 -14   3    0.87    0.63 
  -1  14  -3    0.70    0.58 
  -1  14  -3    0.28    0.71 
   1 -14   3   -0.66    0.58 
  -2  14  -3    9.04    1.37 
  -2  14  -3    6.15    0.86 
   2 -14   3    7.60    1.09 
  -3  14  -3    0.93    0.49 
  -3  14  -3    1.68    0.84 
   3 -14   3    1.34    0.72 
  -4  14  -3    0.43    0.69 
  -4  14  -3    0.48    0.41 
   4 -14   3    1.09    0.78 
  -5  14  -3    0.23    0.61 
  -5  14  -3    0.20    0.37 
   5 -14   3    0.33    0.73 
  -6  14  -3    0.84    0.70 
   6 -14   3   -0.19    0.77 
  -7  14  -3   -0.52    0.57 
   7 -14   3    0.22    0.71 
  -8  14  -3    1.31    0.69 
   8 -14   3    1.53    0.92 
  -9  14  -3   -0.22    0.56 
   9 -14   3   -0.75    0.80 
 -10  14  -3    4.64    1.00 
  10 -14   3    3.40    1.09 
 -11  14  -3    4.97    1.08 
  11 -14   3    7.43    1.22 
 -12  14  -3   -0.46    0.56 
  12 -14   3    0.59    0.91 
 -13  14  -3    1.42    0.76 
  13 -14   3    0.66    0.81 
 -14  14  -3    0.52    0.76 
  14 -14   3    0.69    0.93 
 -15  14  -3    0.28    0.76 
  15 -14   3    0.07    0.93 
 -16  14  -3    8.75    1.53 
  16 -14   3    5.99    1.34 
   5  13  -3    1.82    0.94 
  -5 -13   3    2.00    0.87 
   4  13  -3    2.06    0.95 
  -4 -13   3    1.73    0.87 
   3  13  -3   -0.76    0.65 
  -3 -13   3    0.61    0.71 
   2  13  -3   -0.10    0.65 
  -2 -13   3    0.69    0.66 
   1  13  -3    0.37    0.61 
   1  13  -3   -0.31    0.67 
  -1 -13   3    0.58    0.57 
   0  13  -3    0.88    0.77 
   0  13  -3    0.39    0.61 
   0 -13   3   -0.31    0.52 
  -1  13  -3    0.93    0.78 
  -1  13  -3    0.32    0.53 
   1 -13   3    1.39    0.69 
  -2  13  -3    5.38    1.12 
  -2  13  -3    5.68    0.81 
   2 -13   3    3.83    0.86 
  -3  13  -3    0.88    0.68 
  -3  13  -3   -0.19    0.39 
   3 -13   3    0.44    0.67 
  -4  13  -3    2.02    0.79 
  -4  13  -3    2.77    0.49 
   4 -13   3    2.34    0.79 
  -5  13  -3    0.29    0.31 
  -5  13  -3    0.58    0.70 
   5 -13   3    0.74    0.70 
  -6  13  -3    0.59    0.62 
   6 -13   3    0.20    0.78 
  -7  13  -3    0.43    0.65 
   7 -13   3    1.52    0.76 
  -8  13  -3    6.32    1.13 
   8 -13   3    4.38    1.00 
  -9  13  -3    5.24    1.07 
   9 -13   3    5.93    1.16 
 -10  13  -3    0.82    0.65 
  10 -13   3   -0.07    0.77 
 -11  13  -3    1.65    0.75 
  11 -13   3    2.24    0.98 
 -12  13  -3    3.86    1.01 
  12 -13   3    3.61    1.09 
 -13  13  -3    1.78    0.87 
  13 -13   3    0.30    0.90 
 -14  13  -3    0.56    0.74 
  14 -13   3    3.60    1.12 
 -15  13  -3    1.49    0.91 
  15 -13   3    2.85    1.13 
 -16  13  -3    0.47    0.72 
  16 -13   3    1.13    0.99 
   6  12  -3    0.72    0.88 
  -6 -12   3    0.79    0.67 
   5  12  -3    1.58    0.88 
  -5 -12   3    0.72    0.80 
   4  12  -3    0.25    0.69 
  -4 -12   3    0.13    0.71 
   3  12  -3   -0.93    0.62 
  -3 -12   3    0.12    0.68 
   2  12  -3    0.20    0.63 
  -2 -12   3   -0.58    0.51 
  -2 -12   3   -0.10    0.49 
   1  12  -3    1.76    0.71 
   1  12  -3    1.05    0.70 
  -1 -12   3    2.13    0.64 
   0  12  -3   13.30    1.30 
   0  12  -3    9.64    1.39 
   0 -12   3   13.18    1.25 
  -1  12  -3    5.27    0.99 
  -1  12  -3    5.43    0.83 
   1 -12   3    5.94    0.90 
  -2  12  -3    1.11    0.70 
  -2  12  -3    0.96    0.46 
   2 -12   3    0.58    0.64 
  -3  12  -3    0.56    0.41 
  -3  12  -3    0.09    0.56 
   3 -12   3   -0.42    0.57 
  -4  12  -3    0.19    0.54 
  -4  12  -3    0.87    0.33 
   4 -12   3    1.47    0.67 
  -5  12  -3    2.58    0.36 
  -5  12  -3    2.06    0.75 
   5 -12   3    1.81    0.76 
  -6  12  -3    3.92    0.81 
   6 -12   3    3.66    0.91 
  -7  12  -3    7.14    1.07 
   7 -12   3    3.70    0.94 
  -8  12  -3    2.14    0.75 
   8 -12   3    1.45    0.84 
  -9  12  -3    5.26    1.01 
   9 -12   3    5.59    1.00 
 -10  12  -3    7.32    1.12 
  10 -12   3    9.36    1.31 
 -11  12  -3    1.20    0.75 
  11 -12   3    2.91    0.97 
 -12  12  -3   -0.06    0.59 
  12 -12   3    2.10    0.92 
 -13  12  -3   -0.30    0.56 
  13 -12   3    0.76    0.80 
 -14  12  -3    3.26    0.93 
  14 -12   3    3.45    1.05 
 -15  12  -3    1.89    0.94 
  15 -12   3    1.57    0.96 
 -16  12  -3   -0.19    0.79 
  16 -12   3   -0.23    0.94 
   7  11  -3    0.14    0.82 
  -7 -11   3   -0.03    0.70 
   6  11  -3   -0.45    0.64 
  -6 -11   3    0.17    0.70 
   5  11  -3   -0.57    0.59 
  -5 -11   3    0.30    0.65 
   4  11  -3    0.18    0.58 
  -4 -11   3   -0.58    0.61 
   3  11  -3    1.30    0.69 
  -3 -11   3    2.53    0.77 
  -3 -11   3    1.56    0.55 
   2  11  -3   -0.30    0.57 
  -2 -11   3    1.08    0.54 
  -2 -11   3    0.12    0.57 
   1  11  -3    5.47    1.02 
   1  11  -3    4.80    0.84 
  -1 -11   3    4.16    0.73 
   0  11  -3    0.04    0.46 
   0  11  -3    0.63    0.62 
   0 -11   3    0.64    0.54 
  -1  11  -3    1.90    0.55 
  -1  11  -3    1.80    0.75 
   1 -11   3    1.03    0.57 
  -2  11  -3    2.00    0.68 
  -2  11  -3    4.13    0.59 
   2 -11   3    3.75    0.74 
  -3  11  -3    1.26    0.39 
  -3  11  -3    2.82    0.70 
   3 -11   3    1.27    0.62 
  -4  11  -3    0.26    0.28 
  -4  11  -3    1.04    0.64 
   4 -11   3    1.16    0.63 
  -5  11  -3    4.00    0.40 
  -5  11  -3    4.26    0.77 
   5 -11   3    4.62    0.90 
  -6  11  -3    0.59    0.56 
   6 -11   3    0.07    0.62 
  -7  11  -3    3.64    0.77 
   7 -11   3    4.21    0.93 
  -8  11  -3    4.96    0.84 
   8 -11   3    4.07    0.93 
  -9  11  -3   -0.92    0.40 
   9 -11   3   -1.08    0.63 
 -10  11  -3    2.31    0.82 
  10 -11   3    1.93    0.90 
 -11  11  -3    0.33    0.63 
  11 -11   3   -0.72    0.70 
 -12  11  -3   64.27    4.17 
  12 -11   3   63.90    4.19 
 -13  11  -3    3.71    1.02 
  13 -11   3    4.55    1.12 
 -14  11  -3    2.29    0.92 
  14 -11   3    2.86    0.97 
 -15  11  -3    1.47    0.85 
  15 -11   3    1.30    1.01 
 -16  11  -3   -0.83    0.54 
  16 -11   3    0.33    0.91 
 -17  11  -3    0.67    0.73 
   8  10  -3   -0.93    0.66 
  -8 -10   3    1.01    0.80 
   7  10  -3    0.27    0.68 
  -7 -10   3   -0.04    0.65 
   6  10  -3    2.05    0.87 
  -6 -10   3    2.71    0.89 
   5  10  -3    4.44    0.92 
  -5 -10   3    3.78    0.91 
   4  10  -3    3.07    0.78 
  -4 -10   3    4.62    0.96 
   3  10  -3    1.68    0.64 
  -3 -10   3    2.86    0.57 
  -3 -10   3    1.82    0.69 
   2  10  -3    6.00    1.05 
   2  10  -3    5.86    0.86 
  -2 -10   3    6.53    0.79 
   1  10  -3    2.38    0.63 
   1  10  -3    2.68    0.80 
  -1 -10   3    1.90    0.53 
   0  10  -3    7.53    1.04 
   0  10  -3    7.48    0.87 
   0 -10   3    8.58    0.91 
  -1  10  -3    1.18    0.44 
  -1  10  -3    0.80    0.57 
   1 -10   3    1.71    0.56 
  -2  10  -3   11.57    1.26 
  -2  10  -3   11.60    0.93 
   2 -10   3    9.55    1.08 
  -3  10  -3    0.55    0.30 
  -3  10  -3    0.82    0.53 
   3 -10   3    0.81    0.55 
  -4  10  -3    3.21    0.65 
  -4  10  -3    2.71    0.36 
   4 -10   3    2.61    0.72 
  -5  10  -3    0.33    0.17 
  -5  10  -3    0.24    0.42 
   5 -10   3   -0.14    0.52 
  -6  10  -3    4.60    0.78 
   6 -10   3    5.89    0.94 
  -7  10  -3   -0.15    0.46 
   7 -10   3   -0.82    0.51 
  -8  10  -3    0.32    0.50 
   8 -10   3    1.19    0.68 
  -9  10  -3    2.05    0.70 
   9 -10   3    2.92    0.84 
 -10  10  -3    1.23    0.65 
  10 -10   3    1.76    0.77 
 -11  10  -3   -0.58    0.49 
  11 -10   3    0.07    0.76 
 -12  10  -3   11.68    1.44 
  12 -10   3   12.23    1.49 
 -13  10  -3    8.17    1.27 
  13 -10   3    7.26    1.22 
 -14  10  -3    0.04    0.72 
  14 -10   3    1.20    0.93 
 -15  10  -3   -0.07    0.68 
  15 -10   3   -0.65    0.82 
 -16  10  -3    0.86    0.81 
  16 -10   3   -0.13    0.85 
 -17  10  -3    0.82    0.79 
  17 -10   3    0.15    0.95 
   9   9  -3    0.44    0.81 
  -9  -9   3   -0.10    0.66 
   8   9  -3    3.42    1.04 
  -8  -9   3    2.98    1.02 
   7   9  -3   -1.11    0.66 
  -7  -9   3    0.26    0.65 
   6   9  -3    1.32    0.68 
  -6  -9   3    1.01    0.69 
   5   9  -3    0.49    0.68 
  -5  -9   3   -0.18    0.54 
   4   9  -3    1.26    0.70 
  -4  -9   3    2.40    0.49 
  -4  -9   3    3.34    0.88 
   3   9  -3    8.84    1.10 
  -3  -9   3    7.97    0.80 
  -3  -9   3    7.12    1.13 
   2   9  -3    2.79    0.66 
   2   9  -3    3.39    0.84 
  -2  -9   3    5.07    0.63 
   1   9  -3    3.91    0.77 
   1   9  -3    4.43    0.65 
  -1  -9   3    3.61    0.60 
   0   9  -3    2.48    0.69 
   0   9  -3    2.03    0.50 
   0  -9   3    1.98    0.53 
  -1   9  -3    4.18    0.74 
  -1   9  -3    2.65    0.50 
   1  -9   3    2.92    0.57 
  -2   9  -3   51.28    3.18 
  -2   9  -3   53.32    2.96 
   2  -9   3   47.46    3.07 
  -3   9  -3    5.88    0.83 
  -3   9  -3    6.38    0.59 
   3  -9   3    6.74    0.85 
  -4   9  -3    1.50    0.27 
  -4   9  -3    1.27    0.53 
   4  -9   3    2.15    0.65 
  -5   9  -3    1.04    0.55 
  -5   9  -3    1.24    0.16 
   5  -9   3    2.01    0.67 
  -6   9  -3    0.24    0.49 
   6  -9   3    0.61    0.53 
  -7   9  -3    4.70    0.75 
   7  -9   3    3.37    0.80 
  -8   9  -3   -0.13    0.49 
   8  -9   3    0.53    0.62 
  -9   9  -3    0.33    0.56 
   9  -9   3   -0.18    0.57 
 -10   9  -3   20.53    1.24 
 -10   9  -3   20.24    1.76 
  10  -9   3   21.59    1.85 
 -11   9  -3    8.94    0.68 
 -11   9  -3    5.88    1.04 
  11  -9   3    6.17    1.14 
 -12   9  -3    2.61    0.43 
 -12   9  -3    1.50    0.76 
  12  -9   3    2.65    0.88 
 -13   9  -3    0.90    0.67 
  13  -9   3    1.47    0.88 
 -14   9  -3    0.27    0.58 
  14  -9   3    0.90    0.88 
 -15   9  -3    0.64    0.70 
  15  -9   3    0.28    0.81 
 -16   9  -3    0.48    0.73 
  16  -9   3    0.14    0.90 
 -17   9  -3    0.13    0.61 
  10   8  -3    2.75    0.96 
 -10  -8   3    2.09    0.89 
   9   8  -3   -0.10    0.82 
  -9  -8   3    0.34    0.84 
   8   8  -3    3.30    0.97 
  -8  -8   3    1.54    0.77 
   7   8  -3   -0.39    0.63 
  -7  -8   3    1.81    0.72 
   6   8  -3    2.36    0.76 
  -6  -8   3    3.84    0.96 
   5   8  -3   13.92    1.47 
  -5  -8   3   14.73    1.64 
  -5  -8   3   15.69    1.07 
   4   8  -3   -1.02    0.51 
  -4  -8   3    0.33    0.58 
  -4  -8   3    0.75    0.35 
   3   8  -3    0.34    0.53 
  -3  -8   3    0.51    0.50 
  -3  -8   3    0.84    0.36 
   2   8  -3    7.13    0.99 
   2   8  -3    7.63    0.91 
  -2  -8   3    7.61    0.74 
   1   8  -3    3.64    0.75 
   1   8  -3    2.90    0.57 
  -1  -8   3    3.97    0.56 
   0   8  -3   12.40    1.15 
   0   8  -3   12.65    1.02 
   0  -8   3   11.60    1.01 
  -1   8  -3    2.99    0.47 
  -1   8  -3    3.28    0.73 
   1  -8   3    3.60    0.60 
  -2   8  -3    1.48    0.54 
  -2   8  -3    0.80    0.30 
   2  -8   3    0.78    0.49 
  -3   8  -3    0.71    0.46 
  -3   8  -3    0.89    0.25 
   3  -8   3    0.22    0.49 
  -4   8  -3    3.72    0.67 
  -4   8  -3    3.23    0.31 
   4  -8   3    3.51    0.64 
  -5   8  -3   28.59    1.88 
   5  -8   3   25.86    1.92 
  -6   8  -3    1.55    0.51 
   6  -8   3    0.38    0.58 
  -7   8  -3   13.85    1.28 
   7  -8   3   14.83    1.41 
  -8   8  -3   92.47    5.12 
  -8   8  -3   94.05    5.53 
   8  -8   3   97.60    5.53 
  -9   8  -3   26.83    1.54 
  -9   8  -3   22.98    1.92 
   9  -8   3   26.71    2.00 
 -10   8  -3    7.12    0.64 
 -10   8  -3    7.61    1.07 
  10  -8   3    6.66    1.04 
 -11   8  -3    3.90    0.88 
  11  -8   3    4.12    0.52 
  11  -8   3    3.04    0.84 
 -12   8  -3    5.03    1.03 
  12  -8   3    5.18    1.03 
  12  -8   3    6.11    0.68 
 -13   8  -3    2.27    0.81 
  13  -8   3    2.97    0.93 
  13  -8   3    2.73    0.53 
 -14   8  -3    0.73    0.64 
  14  -8   3   -0.12    0.74 
  14  -8   3    0.67    0.42 
 -15   8  -3    0.05    0.68 
  15  -8   3    0.48    0.80 
 -16   8  -3   -1.10    0.45 
  16  -8   3    0.78    0.81 
  11   7  -3   -0.87    0.76 
 -11  -7   3   -0.06    0.76 
  10   7  -3   -0.25    0.66 
 -10  -7   3   -0.12    0.66 
   9   7  -3    2.14    0.92 
  -9  -7   3    3.23    0.96 
   8   7  -3    2.72    0.81 
  -8  -7   3    1.71    0.85 
   7   7  -3    6.35    1.04 
  -7  -7   3    5.43    1.08 
   6   7  -3    1.77    0.77 
  -6  -7   3    1.49    0.70 
   5   7  -3    0.88    0.56 
  -5  -7   3    2.31    0.74 
  -5  -7   3    2.11    0.36 
   4   7  -3    0.72    0.59 
  -4  -7   3    1.20    0.62 
  -4  -7   3    1.00    0.32 
   3   7  -3    0.04    0.40 
  -3  -7   3    0.73    0.53 
  -3  -7   3   -0.03    0.29 
   2   7  -3   -0.40    0.45 
   2   7  -3   -0.34    0.40 
  -2  -7   3    0.16    0.31 
   1   7  -3    1.02    0.52 
   1   7  -3    0.73    0.38 
  -1  -7   3    0.17    0.32 
   0   7  -3   14.41    1.22 
   0   7  -3   13.82    1.04 
   0  -7   3   13.78    1.05 
  -1   7  -3    4.49    0.53 
  -1   7  -3    6.17    0.78 
   1  -7   3    5.88    0.68 
  -2   7  -3    1.17    0.29 
  -2   7  -3    0.45    0.45 
   2  -7   3    0.13    0.43 
  -3   7  -3   16.52    1.05 
  -3   7  -3   18.12    1.28 
   3  -7   3   17.42    1.33 
  -4   7  -3    0.19    0.16 
  -4   7  -3    0.12    0.41 
   4  -7   3    0.46    0.51 
  -5   7  -3    5.66    0.37 
  -5   7  -3    5.23    0.37 
  -5   7  -3    5.94    0.73 
   5  -7   3    6.72    0.83 
  -6   7  -3   -0.14    0.13 
  -6   7  -3    0.28    0.40 
   6  -7   3   -0.26    0.50 
  -7   7  -3   24.34    1.42 
  -7   7  -3   23.95    1.76 
   7  -7   3   25.14    1.81 
  -8   7  -3  104.74    5.98 
  -8   7  -3  103.18    5.66 
   8  -7   3  101.90    5.96 
  -9   7  -3    3.50    0.77 
   9  -7   3    3.13    0.42 
   9  -7   3    2.86    0.75 
 -10   7  -3    0.33    0.50 
  10  -7   3    0.76    0.65 
  10  -7   3    0.51    0.31 
 -11   7  -3   -0.01    0.55 
  11  -7   3    0.91    0.69 
  11  -7   3    0.98    0.36 
 -12   7  -3    0.67    0.57 
  12  -7   3    0.87    0.74 
  12  -7   3    0.25    0.36 
 -13   7  -3    1.72    0.75 
  13  -7   3    0.74    0.79 
  13  -7   3    1.04    0.47 
 -14   7  -3    3.58    0.91 
  14  -7   3    4.55    0.74 
  14  -7   3    3.01    0.93 
 -15   7  -3    0.44    0.71 
  15  -7   3    0.20    0.50 
  15  -7   3    0.76    0.74 
 -16   7  -3    0.01    0.66 
  16  -7   3   -0.27    0.53 
  16  -7   3    0.36    0.83 
  12   6  -3    2.84    1.08 
 -12  -6   3    2.79    1.01 
  11   6  -3    2.58    0.97 
 -11  -6   3    3.07    1.10 
  10   6  -3    0.71    0.68 
 -10  -6   3    1.66    0.90 
   9   6  -3    0.83    0.80 
  -9  -6   3    0.74    0.77 
   8   6  -3    2.04    0.74 
  -8  -6   3    3.09    0.94 
   7   6  -3    0.53    0.57 
  -7  -6   3   -0.03    0.66 
   6   6  -3    3.62    0.80 
  -6  -6   3    4.38    0.86 
   5   6  -3    3.92    0.78 
  -5  -6   3    4.91    0.44 
  -5  -6   3    4.37    0.87 
   4   6  -3    0.13    0.46 
  -4  -6   3    0.34    0.24 
  -4  -6   3    1.06    0.54 
   3   6  -3    0.56    0.40 
  -3  -6   3    1.05    0.30 
  -3  -6   3    0.57    0.47 
   2   6  -3   11.42    1.05 
   2   6  -3   12.95    1.18 
  -2  -6   3   13.43    0.91 
   1   6  -3    2.28    0.46 
   1   6  -3    1.31    0.45 
  -1  -6   3    1.46    0.38 
   0   6  -3    1.02    0.35 
   0   6  -3    0.05    0.43 
   0  -6   3    1.12    0.36 
  -1   6  -3    0.09    0.37 
  -1   6  -3   -0.01    0.24 
   1  -6   3   -0.56    0.37 
  -2   6  -3    1.24    0.27 
  -2   6  -3    1.47    0.42 
   2  -6   3    1.42    0.48 
  -3   6  -3    4.37    0.59 
  -3   6  -3    4.29    0.37 
   3  -6   3    4.64    0.63 
  -4   6  -3    1.02    0.18 
  -4   6  -3    0.85    0.38 
   4  -6   3    0.34    0.41 
  -5   6  -3   35.02    1.98 
  -5   6  -3   36.29    2.26 
   5  -6   3   36.37    2.29 
  -6   6  -3    0.02    0.17 
  -6   6  -3   -0.30    0.39 
   6  -6   3   -0.82    0.46 
  -7   6  -3   12.32    0.85 
  -7   6  -3   13.61    1.16 
   7  -6   3   12.30    1.21 
  -8   6  -3    3.40    0.66 
   8  -6   3    3.19    0.43 
   8  -6   3    4.21    0.75 
  -9   6  -3    0.99    0.51 
   9  -6   3    1.06    0.63 
   9  -6   3    0.92    0.32 
 -10   6  -3    1.64    0.60 
  10  -6   3    1.70    0.42 
  10  -6   3    1.17    0.68 
 -11   6  -3    2.20    0.74 
  11  -6   3    2.26    0.49 
  11  -6   3    1.18    0.70 
 -12   6  -3    0.68    0.59 
  12  -6   3    0.52    0.67 
  12  -6   3    0.23    0.42 
 -13   6  -3   -0.29    0.58 
  13  -6   3    0.05    0.41 
  13  -6   3   -1.10    0.61 
 -14   6  -3    2.91    0.84 
  14  -6   3    1.85    0.85 
  14  -6   3    3.68    0.75 
 -15   6  -3   -0.34    0.67 
  15  -6   3   -0.04    0.50 
  15  -6   3    0.10    0.76 
 -16   6  -3    0.07    0.71 
  16  -6   3    0.10    0.77 
  16  -6   3    0.79    0.59 
  12   5  -3    0.38    0.74 
 -12  -5   3    0.44    0.92 
  11   5  -3    0.08    0.65 
 -11  -5   3   -0.22    0.76 
  10   5  -3    1.95    0.84 
 -10  -5   3    1.80    0.85 
   9   5  -3    1.35    0.78 
  -9  -5   3    0.87    0.70 
   8   5  -3    0.02    0.64 
  -8  -5   3    1.03    0.67 
   7   5  -3    9.21    1.12 
  -7  -5   3    9.27    1.25 
   6   5  -3    1.62    0.57 
  -6  -5   3    1.96    0.64 
   5   5  -3    0.25    0.46 
  -5  -5   3   -0.01    0.50 
   4   5  -3    9.43    0.98 
  -4  -5   3   10.96    0.70 
  -4  -5   3   11.60    1.19 
   3   5  -3    1.84    0.50 
  -3  -5   3    2.22    0.30 
  -3  -5   3    1.75    0.52 
   2   5  -3    0.04    0.37 
  -2  -5   3    0.40    0.25 
   1   5  -3    1.05    0.45 
   1   5  -3    0.41    0.30 
  -1  -5   3   -0.25    0.26 
   0   5  -3    2.00    0.45 
   0   5  -3    2.25    0.37 
   0  -5   3    1.65    0.37 
  -1   5  -3    0.32    0.24 
   1  -5   3    0.06    0.33 
  -2   5  -3   46.08    2.58 
  -2   5  -3   46.62    2.72 
   2  -5   3   46.51    2.70 
  -3   5  -3    1.91    0.39 
  -3   5  -3    0.78    0.20 
   3  -5   3    1.33    0.46 
  -4   5  -3    8.97    0.57 
  -4   5  -3    8.75    0.82 
   4  -5   3    7.18    0.80 
  -5   5  -3   17.30    1.07 
  -5   5  -3   18.47    1.30 
   5  -5   3   16.93    1.30 
  -6   5  -3    1.23    0.42 
   6  -5   3    1.30    0.54 
  -7   5  -3   19.81    1.51 
   7  -5   3   21.04    1.33 
   7  -5   3   20.86    1.59 
  -8   5  -3    0.28    0.46 
   8  -5   3   -0.11    0.24 
   8  -5   3    0.06    0.48 
  -9   5  -3    9.86    1.14 
   9  -5   3    8.33    1.04 
   9  -5   3   10.93    0.90 
 -10   5  -3    4.70    0.88 
  10  -5   3    5.02    0.87 
  10  -5   3    4.73    0.67 
 -11   5  -3   -0.63    0.45 
  11  -5   3    0.07    0.38 
  11  -5   3    0.08    0.56 
 -12   5  -3    1.13    0.65 
  12  -5   3   -0.45    0.39 
  12  -5   3    0.43    0.62 
 -13   5  -3    1.46    0.67 
  13  -5   3    1.96    0.62 
  13  -5   3    2.37    0.79 
 -14   5  -3    6.14    1.15 
  14  -5   3    2.70    0.73 
  14  -5   3    4.58    0.99 
 -15   5  -3    2.09    0.86 
  15  -5   3    1.61    0.83 
  15  -5   3    2.10    0.72 
 -16   5  -3   -0.13    0.71 
  16  -5   3    0.59    0.65 
  16  -5   3   -0.45    0.71 
  13   4  -3    0.74    0.85 
 -13  -4   3    0.55    0.88 
  12   4  -3    1.42    0.84 
 -12  -4   3    0.98    0.79 
  11   4  -3    2.51    0.96 
 -11  -4   3    1.66    0.82 
  10   4  -3    2.21    0.87 
 -10  -4   3    2.10    0.92 
   9   4  -3    1.89    0.73 
  -9  -4   3    4.06    0.94 
   8   4  -3    2.48    0.70 
  -8  -4   3    4.37    0.96 
   7   4  -3    5.73    0.92 
  -7  -4   3    6.44    1.00 
   6   4  -3    2.96    0.65 
  -6  -4   3    1.27    0.57 
   5   4  -3    0.51    0.42 
  -5  -4   3    0.64    0.47 
   4   4  -3    3.79    0.61 
  -4  -4   3    2.51    0.58 
   3   4  -3   46.03    2.90 
  -3  -4   3   49.62    2.97 
  -3  -4   3   49.81    2.66 
   2   4  -3    2.11    0.45 
  -2  -4   3    1.85    0.28 
  -2  -4   3    1.92    0.48 
   1   4  -3    4.64    0.58 
   1   4  -3    4.60    0.50 
  -1  -4   3    4.51    0.42 
   0   4  -3   36.48    2.16 
   0   4  -3   36.19    2.08 
   0  -4   3   35.73    2.07 
  -1   4  -3   10.54    0.72 
  -1   4  -3   10.41    0.83 
   1  -4   3   10.31    0.82 
  -2   4  -3    3.78    0.33 
  -2   4  -3    2.47    0.40 
   2  -4   3    3.16    0.46 
  -3   4  -3  104.46    5.79 
  -3   4  -3  103.99    5.68 
   3  -4   3  105.76    5.81 
  -4   4  -3   88.59    5.01 
  -4   4  -3   90.08    4.90 
   4  -4   3   90.06    5.05 
  -5   4  -3   28.35    1.80 
   5  -4   3   27.47    1.87 
   5  -4   3   28.43    1.67 
  -6   4  -3   10.63    0.94 
   6  -4   3   10.88    0.85 
   6  -4   3   12.73    1.09 
  -7   4  -3    0.43    0.40 
   7  -4   3    0.74    0.51 
   7  -4   3    0.45    0.30 
  -8   4  -3    0.52    0.47 
   8  -4   3    0.13    0.48 
   8  -4   3    0.36    0.31 
  -9   4  -3    4.22    0.77 
   9  -4   3    4.52    0.62 
   9  -4   3    4.57    0.77 
 -10   4  -3    9.70    1.14 
  10  -4   3    7.78    1.01 
  10  -4   3    9.17    0.99 
 -11   4  -3   -0.03    0.53 
  11  -4   3   -0.31    0.52 
  11  -4   3   -0.20    0.42 
 -12   4  -3    0.16    0.58 
  12  -4   3   -0.13    0.48 
  12  -4   3    0.54    0.62 
 -13   4  -3    0.54    0.62 
  13  -4   3   -0.17    0.58 
  13  -4   3   -0.26    0.47 
 -14   4  -3    1.01    0.73 
  14  -4   3    1.27    0.67 
  14  -4   3    0.06    0.65 
 -15   4  -3    2.68    0.93 
  15  -4   3    1.57    0.79 
  15  -4   3    2.52    0.84 
  14   3  -3    0.92    0.89 
  13   3  -3   -0.09    0.76 
 -13  -3   3    0.00    0.83 
  12   3  -3    0.66    0.72 
 -12  -3   3   -0.16    0.70 
  11   3  -3    0.25    0.61 
 -11  -3   3    1.18    0.74 
  10   3  -3   -0.11    0.67 
 -10  -3   3    1.23    0.73 
   9   3  -3   -0.34    0.50 
  -9  -3   3    1.18    0.70 
   8   3  -3    2.41    0.64 
  -8  -3   3    0.59    0.65 
   7   3  -3    0.34    0.45 
  -7  -3   3    0.05    0.52 
   6   3  -3    0.02    0.43 
  -6  -3   3   -0.48    0.46 
   5   3  -3    1.68    0.47 
  -5  -3   3    1.33    0.53 
   4   3  -3    1.24    0.43 
  -4  -3   3    1.39    0.53 
   3   3  -3    0.89    0.37 
  -3  -3   3    0.25    0.37 
   2   3  -3   23.72    1.50 
  -2  -3   3   24.60    1.58 
  -2  -3   3   23.91    1.34 
  -2  -3   3   24.09    1.34 
   1   3  -3    3.54    0.45 
   1   3  -3    5.12    0.56 
  -1  -3   3    3.69    0.36 
   0   3  -3   28.08    1.64 
   0   3  -3   26.12    1.60 
   0  -3   3   27.55    1.60 
  -1   3  -3   16.23    0.98 
  -1   3  -3   16.34    1.02 
   1  -3   3   15.09    1.08 
  -2   3  -3    5.55    0.52 
  -2   3  -3    6.35    0.47 
   2  -3   3    2.69    0.60 
  -3   3  -3   63.85    3.49 
  -3   3  -3   62.74    3.54 
   3  -3   3   62.51    3.60 
  -4   3  -3   63.43    3.64 
   4  -3   3   66.72    3.59 
   4  -3   3   62.71    3.68 
  -5   3  -3    1.66    0.45 
   5  -3   3    2.91    0.58 
   5  -3   3    1.83    0.36 
  -6   3  -3    4.94    0.68 
   6  -3   3    4.30    0.54 
   6  -3   3    5.85    0.71 
  -7   3  -3    3.05    0.58 
   7  -3   3    1.38    0.51 
   7  -3   3    1.49    0.41 
  -8   3  -3    1.45    0.51 
   8  -3   3    1.48    0.52 
   8  -3   3    1.54    0.44 
  -9   3  -3    2.45    0.64 
   9  -3   3    2.33    0.63 
   9  -3   3    1.76    0.52 
 -10   3  -3    0.31    0.47 
  10  -3   3   -0.25    0.50 
  10  -3   3    0.19    0.46 
 -11   3  -3    0.68    0.59 
  11  -3   3    0.04    0.48 
  11  -3   3   -0.25    0.51 
 -12   3  -3    1.02    0.66 
  12  -3   3   -0.25    0.50 
  12  -3   3   -0.19    0.56 
 -13   3  -3   -0.64    0.55 
  13  -3   3    0.99    0.60 
  13  -3   3   -0.03    0.62 
 -14   3  -3    0.51    0.73 
  14  -3   3    1.77    0.75 
  14  -3   3    0.07    0.60 
 -15   3  -3    2.74    1.01 
  15  -3   3    3.39    0.99 
  14   2  -3    0.48    0.82 
 -14  -2   3    0.88    0.96 
  13   2  -3    0.13    0.72 
 -13  -2   3   -0.45    0.75 
  12   2  -3    2.83    0.85 
 -12  -2   3    3.51    0.97 
  11   2  -3    1.98    0.80 
 -11  -2   3    1.69    0.80 
  10   2  -3    0.15    0.53 
 -10  -2   3    0.18    0.70 
   9   2  -3    3.12    0.36 
   9   2  -3    2.54    0.68 
  -9  -2   3    3.16    0.82 
   8   2  -3    1.24    0.59 
   8   2  -3    1.12    0.23 
  -8  -2   3    1.18    0.61 
   7   2  -3   -0.16    0.15 
   7   2  -3    0.36    0.46 
  -7  -2   3    0.38    0.50 
   6   2  -3   -0.12    0.35 
  -6  -2   3    0.78    0.55 
   5   2  -3    8.90    0.88 
  -5  -2   3    7.70    0.89 
   4   2  -3    0.29    0.38 
  -4  -2   3   -0.34    0.35 
   3   2  -3    8.41    0.72 
  -3  -2   3    8.01    0.76 
   2   2  -3    0.12    0.13 
   2   2  -3    0.00    0.26 
  -2  -2   3   -0.29    0.29 
  -2  -2   3    0.16    0.12 
   1   2  -3  173.13    9.80 
  -1  -2   3  190.25    9.75 
  -1  -2   3  179.52    9.83 
   0   2  -3   79.53    4.31 
   0   2  -3   78.76    4.31 
   0  -2   3   77.39    4.30 
  -1   2  -3  471.48   24.86 
  -1   2  -3  461.78   24.75 
   1  -2   3  451.85   24.78 
  -2   2  -3   37.61    2.23 
  -2   2  -3   37.04    2.22 
   2  -2   3   42.97    2.30 
  -3   2  -3   11.99    0.85 
  -3   2  -3   12.63    0.86 
   3  -2   3   12.32    0.95 
  -4   2  -3    8.78    0.75 
   4  -2   3    9.66    0.85 
   4  -2   3    8.42    0.73 
  -5   2  -3   -0.06    0.32 
   5  -2   3   -0.57    0.35 
   5  -2   3    0.37    0.28 
  -6   2  -3    3.92    0.61 
   6  -2   3    4.34    0.62 
   6  -2   3    3.60    0.52 
  -7   2  -3    2.60    0.55 
   7  -2   3    3.27    0.61 
   7  -2   3    1.83    0.48 
  -8   2  -3    5.89    0.81 
   8  -2   3    5.71    0.75 
   8  -2   3    5.24    0.73 
  -9   2  -3    0.27    0.46 
   9  -2   3   -0.35    0.44 
   9  -2   3    0.07    0.40 
 -10   2  -3    2.01    0.63 
  10  -2   3    2.40    0.67 
  10  -2   3    2.98    0.72 
 -11   2  -3    3.03    0.79 
  11  -2   3    4.40    0.87 
  11  -2   3    4.23    0.78 
 -12   2  -3   -0.50    0.54 
  12  -2   3    0.08    0.53 
  12  -2   3    0.29    0.53 
 -13   2  -3   -0.95    0.52 
  13  -2   3   -0.94    0.50 
  13  -2   3    0.55    0.65 
 -14   2  -3    1.97    0.81 
  14  -2   3    1.00    0.70 
  14  -2   3    1.12    0.77 
 -15   2  -3   -0.14    0.73 
  15  -2   3    0.26    0.81 
  15   1  -3    2.33    0.98 
 -15  -1   3    2.14    1.13 
  14   1  -3    1.22    0.71 
 -14  -1   3    0.21    0.81 
  13   1  -3    7.04    1.18 
 -13  -1   3    4.07    1.07 
  12   1  -3    0.12    0.62 
 -12  -1   3    1.15    0.75 
  11   1  -3    4.73    0.82 
 -11  -1   3    3.08    0.94 
  10   1  -3    2.25    0.65 
  10   1  -3    2.13    0.38 
 -10  -1   3    2.83    0.85 
   9   1  -3    2.75    0.65 
   9   1  -3    2.35    0.37 
  -9  -1   3    2.00    0.72 
   8   1  -3    8.61    0.68 
   8   1  -3   10.11    1.03 
  -8  -1   3   10.93    1.22 
   7   1  -3   -0.06    0.19 
   7   1  -3    0.84    0.42 
  -7  -1   3   -0.02    0.54 
   6   1  -3    5.07    0.68 
   6   1  -3    6.70    0.50 
  -6  -1   3    7.77    0.92 
   5   1  -3    1.87    0.43 
   5   1  -3    3.10    0.29 
  -5  -1   3    2.84    0.56 
   4   1  -3    0.31    0.30 
   4   1  -3    0.15    0.15 
  -4  -1   3    0.05    0.39 
   3   1  -3   -0.07    0.25 
  -3  -1   3    0.18    0.15 
  -3  -1   3   -0.02    0.33 
   2   1  -3  139.80    7.51 
  -2  -1   3  140.71    7.43 
  -2  -1   3  132.91    7.52 
   1   1  -3   11.04    0.81 
  -1  -1   3   13.32    0.83 
   0   1  -3   35.27    2.04 
   0   1  -3   35.53    1.99 
   0  -1   3   36.88    2.05 
  -1   1  -3    1.50    0.28 
  -1   1  -3    1.79    0.20 
   1  -1   3    1.10    0.31 
  -2   1  -3   33.61    1.82 
  -2   1  -3   30.96    1.89 
   2  -1   3   31.17    1.94 
  -3   1  -3    3.79    0.41 
   3  -1   3    3.67    0.52 
   3  -1   3    3.17    0.42 
  -4   1  -3    1.59    0.37 
   4  -1   3    1.00    0.40 
   4  -1   3    2.48    0.44 
  -5   1  -3    0.39    0.34 
   5  -1   3    0.48    0.41 
   5  -1   3    0.42    0.36 
  -6   1  -3    9.03    0.88 
   6  -1   3    7.71    0.83 
   6  -1   3    7.87    0.84 
  -7   1  -3    4.00    0.65 
   7  -1   3    3.58    0.65 
   7  -1   3    3.22    0.60 
  -8   1  -3    2.96    0.62 
   8  -1   3    2.43    0.57 
   8  -1   3    2.52    0.58 
  -9   1  -3    0.55    0.55 
   9  -1   3    0.48    0.55 
   9  -1   3   -0.10    0.46 
 -10   1  -3    2.40    0.72 
  10  -1   3    1.46    0.58 
  10  -1   3    2.76    0.74 
 -11   1  -3    0.49    0.58 
  11  -1   3    0.11    0.52 
  11  -1   3    0.43    0.63 
 -12   1  -3   -0.71    0.52 
  12  -1   3   -0.57    0.53 
  12  -1   3   -0.01    0.52 
 -13   1  -3    0.49    0.65 
  13  -1   3    0.30    0.60 
  13  -1   3    0.39    0.62 
 -14   1  -3   -0.54    0.63 
  14  -1   3    0.84    0.80 
  15   0  -3    9.18    1.31 
 -15   0   3    6.93    1.47 
  14   0  -3    1.34    0.79 
 -14   0   3    1.00    0.87 
  13   0  -3    0.10    0.66 
 -13   0   3    0.18    0.69 
  12   0  -3   -0.04    0.59 
 -12   0   3   -0.05    0.63 
  11   0  -3    0.13    0.34 
  11   0  -3    0.27    0.60 
 -11   0   3    0.56    0.71 
  10   0  -3    0.19    0.30 
  10   0  -3    0.75    0.48 
 -10   0   3    0.99    0.70 
   9   0  -3    0.53    0.29 
   9   0  -3    0.33    0.43 
  -9   0   3    1.59    0.67 
   8   0  -3    4.80    0.49 
   8   0  -3    2.66    0.56 
  -8   0   3    4.28    0.83 
   7   0  -3   10.74    1.01 
   7   0  -3   10.70    0.79 
  -7   0   3   12.29    1.21 
   6   0  -3    0.06    0.23 
   6   0  -3   -0.47    0.29 
  -6   0   3    0.25    0.43 
   5   0  -3   10.05    0.84 
   5   0  -3    8.41    0.66 
  -5   0   3   10.05    0.91 
   4   0  -3   32.56    1.87 
   4   0  -3   33.75    1.98 
   3   0  -3    3.25    0.43 
  -3   0   3    3.10    0.59 
  -3   0   3    1.79    0.34 
   2   0  -3   14.59    0.97 
  -2   0   3   14.60    0.94 
  -2   0   3   15.15    0.99 
   1   0  -3  123.95    6.87 
  -1   0   3  127.20    6.83 
  -1   0   3  128.47    6.88 
   0   0  -3   51.46    2.90 
   0   0   3   52.07    2.92 
  -1   0  -3    3.15    0.41 
  -1   0  -3    4.02    0.29 
   1   0   3    3.97    0.29 
   1   0   3    3.99    0.46 
  -2   0  -3   42.27    2.39 
   2   0   3   42.34    2.51 
   2   0   3   45.02    2.50 
  -3   0  -3    0.34    0.26 
   3   0   3    0.66    0.31 
   3   0   3    0.24    0.32 
  -4   0  -3    9.47    0.80 
   4   0   3   10.47    0.89 
   4   0   3   10.65    0.88 
  -5   0  -3    3.88    0.58 
   5   0   3    4.09    0.59 
   5   0   3    3.81    0.56 
  -6   0  -3    0.21    0.36 
   6   0   3    0.10    0.35 
   6   0   3   -0.06    0.37 
  -7   0  -3    9.30    0.95 
   7   0   3    7.13    0.88 
   7   0   3    7.64    0.86 
  -8   0  -3   10.74    1.11 
   8   0   3    8.21    1.01 
   8   0   3    9.55    0.99 
  -9   0  -3    0.81    0.55 
   9   0   3    0.83    0.64 
   9   0   3    0.76    0.49 
 -10   0  -3    0.32    0.55 
  10   0   3    0.05    0.49 
  10   0   3    0.71    0.64 
 -11   0  -3    0.40    0.60 
  11   0   3    0.21    0.60 
  11   0   3    0.31    0.54 
 -12   0  -3    0.56    0.69 
  12   0   3   -0.48    0.49 
  12   0   3    0.67    0.72 
 -13   0  -3   -0.67    0.58 
  13   0   3    0.34    0.74 
 -14   0  -3    1.00    0.79 
  14   0   3   -0.55    0.68 
  15  -1  -3   -0.44    0.63 
 -15   1   3    1.14    0.95 
  14  -1  -3    0.19    0.59 
 -14   1   3    0.49    0.79 
  13  -1  -3    0.08    0.56 
 -13   1   3    0.95    0.76 
  12  -1  -3    6.21    0.75 
  12  -1  -3    6.35    0.99 
 -12   1   3    6.69    1.16 
  11  -1  -3    0.37    0.36 
  11  -1  -3    0.24    0.44 
 -11   1   3   -0.11    0.64 
  10  -1  -3    0.50    0.43 
  10  -1  -3    0.88    0.40 
 -10   1   3    1.66    0.72 
   9  -1  -3    0.23    0.42 
   9  -1  -3    0.36    0.33 
  -9   1   3    1.13    0.59 
   8  -1  -3    0.64    0.34 
   8  -1  -3   -0.12    0.41 
  -8   1   3    0.55    0.51 
   7  -1  -3    1.01    0.32 
   7  -1  -3    0.45    0.37 
  -7   1   3    0.51    0.48 
   6  -1  -3    0.24    0.29 
   6  -1  -3    0.25    0.31 
  -6   1   3    0.11    0.43 
   5  -1  -3    3.15    0.47 
  -5   1   3    3.37    0.54 
   4  -1  -3    2.57    0.38 
  -4   1   3    2.35    0.35 
   3  -1  -3   66.66    3.75 
  -3   1   3   69.64    3.78 
  -3   1   3   65.78    3.73 
   2  -1  -3    3.64    0.43 
  -2   1   3    4.41    0.43 
  -2   1   3    3.78    0.46 
   1  -1  -3    0.40    0.24 
  -1   1   3    0.33    0.28 
  -1   1   3    1.05    0.20 
   0  -1  -3    6.05    0.56 
   0  -1  -3    6.38    0.42 
   0   1   3    6.27    0.41 
   0   1   3    6.72    0.60 
  -1  -1  -3   19.09    1.13 
   1   1   3   19.61    1.27 
   1   1   3   20.32    1.28 
  -2  -1  -3   18.88    1.12 
   2   1   3   18.32    1.23 
   2   1   3   17.34    1.23 
  -3  -1  -3    6.44    0.59 
   3   1   3    5.65    0.65 
   3   1   3    5.01    0.61 
  -4  -1  -3   12.32    0.96 
   4   1   3   11.52    1.00 
   4   1   3   12.33    0.97 
  -5  -1  -3    1.57    0.44 
   5   1   3    1.17    0.41 
   5   1   3    0.99    0.45 
  -6  -1  -3    2.53    0.54 
   6   1   3    2.60    0.62 
   6   1   3    1.10    0.46 
  -7  -1  -3    5.44    0.75 
   7   1   3    4.97    0.70 
   7   1   3    3.53    0.73 
  -8  -1  -3    5.57    0.84 
   8   1   3    4.33    0.88 
   8   1   3    6.61    0.83 
  -9  -1  -3    1.05    0.57 
   9   1   3    1.40    0.64 
   9   1   3    0.44    0.50 
 -10  -1  -3    5.60    0.98 
  10   1   3    8.22    0.99 
  10   1   3    6.85    1.10 
 -11  -1  -3    0.05    0.60 
  11   1   3    0.96    0.57 
  11   1   3    1.52    0.74 
 -12  -1  -3    0.27    0.65 
  12   1   3    0.41    0.74 
 -13  -1  -3    0.07    0.72 
  13   1   3    0.40    0.87 
  16  -2  -3    0.32    0.72 
 -16   2   3    1.79    0.97 
  15  -2  -3    0.17    0.63 
 -15   2   3   -0.91    0.69 
  14  -2  -3   -0.24    0.58 
 -14   2   3    0.69    0.83 
  13  -2  -3    0.25    0.46 
  13  -2  -3    0.16    0.57 
 -13   2   3    1.01    0.72 
  12  -2  -3    2.27    0.67 
  12  -2  -3    4.01    0.66 
 -12   2   3    2.77    0.83 
  11  -2  -3    4.04    0.65 
  11  -2  -3    3.12    0.68 
 -11   2   3    4.85    1.00 
  10  -2  -3    8.99    0.88 
  10  -2  -3    8.24    0.89 
 -10   2   3    8.37    1.11 
   9  -2  -3    5.17    0.65 
   9  -2  -3    5.47    0.72 
  -9   2   3    5.75    0.89 
   8  -2  -3    3.45    0.52 
   8  -2  -3    3.26    0.53 
  -8   2   3    2.65    0.65 
   7  -2  -3    7.69    0.75 
   7  -2  -3    7.11    0.72 
  -7   2   3    7.49    0.95 
   6  -2  -3    0.07    0.32 
   6  -2  -3   -0.47    0.29 
  -6   2   3    0.77    0.42 
   5  -2  -3    6.21    0.57 
  -5   2   3    5.54    0.70 
   4  -2  -3   45.08    2.54 
  -4   2   3   44.14    2.57 
  -4   2   3   43.80    2.60 
   3  -2  -3    5.71    0.54 
  -3   2   3    5.84    0.59 
  -3   2   3    6.72    0.61 
   2  -2  -3    0.89    0.28 
  -2   2   3    1.38    0.29 
  -2   2   3    1.20    0.33 
   1  -2  -3    0.25    0.23 
  -1   2   3   -0.25    0.29 
  -1   2   3    0.30    0.19 
   0  -2  -3    5.50    0.57 
   0   2   3    5.32    0.62 
   0   2   3    5.35    0.44 
  -1  -2  -3    5.32    0.49 
   1   2   3    4.05    0.54 
   1   2   3    8.01    0.70 
  -2  -2  -3   13.43    0.94 
   2   2   3   13.28    1.06 
   2   2   3   14.16    1.04 
  -3  -2  -3   16.23    1.12 
   3   2   3   16.78    1.18 
   3   2   3   15.98    1.22 
  -4  -2  -3    9.37    0.85 
   4   2   3    6.26    0.80 
   4   2   3    8.09    0.81 
  -5  -2  -3    4.35    0.64 
   5   2   3    2.82    0.55 
   5   2   3    3.50    0.62 
  -6  -2  -3   -0.34    0.38 
   6   2   3   -0.22    0.34 
   6   2   3    0.11    0.45 
  -7  -2  -3    0.68    0.51 
   7   2   3   -0.81    0.43 
   7   2   3   -0.21    0.40 
  -8  -2  -3    4.52    0.83 
   8   2   3    4.30    0.83 
   8   2   3    4.48    0.73 
  -9  -2  -3   -0.02    0.51 
   9   2   3   -0.83    0.50 
   9   2   3    0.90    0.51 
 -10  -2  -3    1.36    0.63 
  10   2   3    0.78    0.54 
  10   2   3    0.82    0.70 
 -11  -2  -3    0.95    0.70 
  11   2   3    1.19    0.74 
  11   2   3    0.56    0.63 
 -12  -2  -3   -0.80    0.59 
  12   2   3    0.70    0.74 
  16  -3  -3    0.39    0.63 
 -16   3   3    0.65    0.89 
  15  -3  -3   -0.21    0.59 
 -15   3   3   -0.13    0.79 
  14  -3  -3    0.16    0.57 
 -14   3   3    1.73    0.87 
  13  -3  -3    1.44    0.58 
  13  -3  -3    1.27    0.56 
 -13   3   3    0.61    0.66 
  12  -3  -3   -0.12    0.41 
  12  -3  -3    0.15    0.50 
 -12   3   3    0.12    0.67 
  11  -3  -3    0.95    0.46 
  11  -3  -3    0.42    0.46 
 -11   3   3   -0.33    0.57 
  10  -3  -3    1.52    0.44 
  10  -3  -3    0.56    0.43 
 -10   3   3    0.12    0.56 
   9  -3  -3    3.48    0.55 
   9  -3  -3    4.30    0.61 
  -9   3   3    3.24    0.71 
   8  -3  -3   -0.31    0.28 
   8  -3  -3    0.34    0.37 
  -8   3   3    0.28    0.44 
   7  -3  -3   30.56    1.90 
   7  -3  -3   30.41    1.95 
  -7   3   3   32.78    2.11 
   6  -3  -3    0.88    0.32 
   6  -3  -3    0.59    0.36 
  -6   3   3    1.85    0.53 
   5  -3  -3    5.17    0.51 
  -5   3   3    5.08    0.60 
  -5   3   3    6.09    0.72 
   4  -3  -3   10.71    0.78 
  -4   3   3   12.22    0.88 
  -4   3   3    9.91    0.85 
   3  -3  -3   10.91    0.76 
  -3   3   3   11.29    0.89 
  -3   3   3   10.11    0.81 
   2  -3  -3    0.88    0.29 
  -2   3   3    0.50    0.27 
  -2   3   3    0.40    0.36 
   1  -3  -3    0.07    0.25 
  -1   3   3    0.05    0.31 
  -1   3   3   -0.07    0.21 
   0   3   3    8.24    0.77 
   0   3   3    6.66    0.67 
   0   3   3    6.84    0.59 
   1   3   3   13.72    0.95 
   1   3   3   15.13    1.11 
   1   3   3   13.77    1.08 
  -2  -3  -3   -0.11    0.29 
   2   3   3   -0.17    0.35 
   2   3   3    0.33    0.39 
  -3  -3  -3    4.57    0.59 
   3   3   3    3.42    0.60 
   3   3   3    4.86    0.64 
  -4  -3  -3    5.41    0.69 
   4   3   3    4.32    0.69 
   4   3   3    5.98    0.72 
  -5  -3  -3    0.34    0.41 
   5   3   3   -0.87    0.44 
   5   3   3    0.33    0.40 
  -6  -3  -3   19.35    1.55 
   6   3   3   21.65    1.67 
   6   3   3   19.64    1.49 
  -7  -3  -3   -0.27    0.47 
   7   3   3    0.48    0.50 
   7   3   3   -0.38    0.53 
  -8  -3  -3    0.74    0.57 
   8   3   3    0.51    0.68 
   8   3   3    1.06    0.53 
  -9  -3  -3   11.35    1.37 
   9   3   3   11.04    1.46 
   9   3   3   13.24    1.29 
 -10  -3  -3    0.16    0.62 
  10   3   3    0.10    0.65 
  10   3   3    0.56    0.53 
 -11  -3  -3    0.80    0.67 
  11   3   3    0.49    0.82 
 -12  -3  -3    0.76    0.73 
  12   3   3    0.17    0.87 
  16  -4  -3    1.32    0.66 
 -16   4   3    0.14    0.78 
  15  -4  -3    0.32    0.54 
 -15   4   3    0.07    0.81 
  14  -4  -3    1.18    0.59 
  14  -4  -3   -0.93    0.53 
 -14   4   3   -0.01    0.63 
  13  -4  -3    0.70    0.53 
  13  -4  -3    1.67    0.63 
 -13   4   3    1.40    0.75 
  12  -4  -3    7.41    0.92 
  12  -4  -3    5.40    0.78 
 -12   4   3    5.71    1.09 
  11  -4  -3   -0.24    0.34 
  11  -4  -3   -0.28    0.47 
 -11   4   3   -0.97    0.51 
  10  -4  -3    0.43    0.35 
  10  -4  -3    0.90    0.46 
 -10   4   3    0.19    0.56 
   9  -4  -3    3.49    0.62 
   9  -4  -3    3.52    0.52 
  -9   4   3    2.87    0.67 
   8  -4  -3    2.03    0.48 
   8  -4  -3    0.87    0.35 
  -8   4   3    2.92    0.67 
   7  -4  -3    8.96    0.87 
   7  -4  -3    8.14    0.69 
  -7   4   3    6.15    0.85 
   6  -4  -3   17.58    1.07 
   6  -4  -3   14.61    1.20 
  -6   4   3   15.74    1.28 
   5  -4  -3   11.71    0.83 
  -5   4   3   12.28    0.96 
  -5   4   3   11.89    1.02 
   4  -4  -3   15.61    0.98 
  -4   4   3   15.44    1.12 
  -4   4   3   12.94    1.07 
   3  -4  -3   12.63    0.88 
  -3   4   3   11.55    1.03 
  -3   4   3   11.78    0.93 
   2  -4  -3    1.67    0.36 
  -2   4   3    2.47    0.50 
  -2   4   3    1.52    0.36 
   1  -4  -3   18.11    1.20 
  -1   4   3   16.73    1.14 
  -1   4   3   17.01    1.27 
   0   4   3   14.86    1.04 
   0   4   3   15.18    1.15 
   0   4   3   15.27    1.12 
   1   4   3    4.38    0.52 
   1   4   3    3.87    0.59 
   1   4   3    2.75    0.53 
  -2  -4  -3   16.12    1.13 
   2   4   3   13.59    1.23 
   2   4   3   15.62    1.18 
  -3  -4  -3    0.03    0.33 
   3   4   3    0.31    0.41 
   3   4   3    0.14    0.37 
  -4  -4  -3    3.08    0.59 
   4   4   3    4.23    0.65 
  -5  -4  -3    1.05    0.48 
   5   4   3    0.52    0.45 
   5   4   3    1.32    0.62 
  -6  -4  -3    0.08    0.45 
   6   4   3    0.09    0.54 
   6   4   3    0.61    0.51 
  -7  -4  -3    1.00    0.61 
   7   4   3    0.81    0.68 
   7   4   3    1.49    0.53 
  -8  -4  -3    1.89    0.70 
   8   4   3    1.53    0.74 
   8   4   3    0.83    0.54 
  -9  -4  -3    2.58    0.79 
   9   4   3    2.82    0.86 
   9   4   3    2.09    0.65 
 -10  -4  -3   -0.29    0.56 
  10   4   3    0.93    0.82 
 -11  -4  -3    2.28    0.84 
  11   4   3    2.41    0.98 
  17  -5  -3   -0.65    0.53 
 -17   5   3   -0.07    0.86 
  16  -5  -3    0.55    0.57 
 -16   5   3   -0.15    0.71 
  15  -5  -3    0.68    0.51 
  15  -5  -3    0.50    0.63 
 -15   5   3   -0.03    0.70 
  14  -5  -3    2.13    0.72 
  14  -5  -3    2.04    0.61 
 -14   5   3    2.06    0.88 
  13  -5  -3    0.75    0.49 
  13  -5  -3    2.38    0.71 
 -13   5   3    1.60    0.77 
  12  -5  -3    5.83    0.86 
  12  -5  -3    2.29    0.54 
 -12   5   3    2.77    0.82 
  11  -5  -3    4.67    0.64 
  11  -5  -3    4.54    0.79 
 -11   5   3    5.62    0.95 
  10  -5  -3    3.55    0.70 
  10  -5  -3    3.30    0.52 
 -10   5   3    4.26    0.83 
   9  -5  -3    1.37    0.36 
   9  -5  -3    1.89    0.54 
  -9   5   3    1.75    0.64 
   8  -5  -3    0.41    0.41 
   8  -5  -3    0.30    0.28 
  -8   5   3   -0.10    0.42 
   7  -5  -3    5.75    0.75 
   7  -5  -3    6.82    0.58 
  -7   5   3    6.06    0.81 
   6  -5  -3   18.75    1.22 
  -6   5   3   20.88    1.47 
  -6   5   3   19.26    1.42 
   5  -5  -3    6.05    0.56 
  -5   5   3    5.56    0.69 
  -5   5   3    6.23    0.72 
   4  -5  -3    5.90    0.57 
  -4   5   3    6.92    0.79 
  -4   5   3    6.38    0.74 
   3  -5  -3   17.41    1.15 
  -3   5   3   17.91    1.21 
  -3   5   3   16.09    1.33 
   2  -5  -3    0.45    0.31 
  -2   5   3    0.36    0.39 
  -2   5   3    0.41    0.33 
  -1   5   3   30.06    1.98 
  -1   5   3   30.60    1.88 
   0   5   3    0.66    0.41 
   0   5   3    0.78    0.36 
   0   5   3    0.44    0.34 
   1   5   3   16.81    1.27 
   1   5   3   15.98    1.24 
   1   5   3   15.20    1.15 
  -2  -5  -3    9.08    0.84 
   2   5   3    8.84    0.93 
   2   5   3    8.85    0.97 
  -3  -5  -3    1.23    0.46 
   3   5   3    1.15    0.56 
   3   5   3    0.82    0.48 
  -4  -5  -3    0.44    0.41 
   4   5   3    0.40    0.50 
   4   5   3    1.44    0.47 
  -5  -5  -3    5.45    0.85 
   5   5   3    7.32    0.99 
   5   5   3    6.00    0.83 
  -6  -5  -3    0.47    0.54 
   6   5   3   -0.15    0.53 
   6   5   3   -0.28    0.44 
  -7  -5  -3   -0.14    0.51 
   7   5   3   -0.76    0.45 
   7   5   3    0.07    0.60 
  -8  -5  -3    0.91    0.67 
   8   5   3    0.33    0.65 
   8   5   3    0.95    0.55 
  -9  -5  -3    0.88    0.71 
   9   5   3    1.04    0.76 
 -10  -5  -3   -0.32    0.61 
  10   5   3   -0.67    0.79 
  17  -6  -3    0.20    0.57 
 -17   6   3    0.87    0.84 
  16  -6  -3    0.63    0.52 
  16  -6  -3    0.87    0.73 
 -16   6   3    0.65    0.75 
  15  -6  -3   -0.71    0.41 
  15  -6  -3    0.21    0.70 
 -15   6   3   -0.17    0.76 
  14  -6  -3    0.53    0.45 
  14  -6  -3    0.84    0.68 
 -14   6   3    0.86    0.80 
  13  -6  -3    0.21    0.39 
  13  -6  -3    0.34    0.63 
 -13   6   3    0.01    0.58 
  12  -6  -3    3.81    0.57 
  12  -6  -3    4.29    0.83 
 -12   6   3    1.78    0.75 
  11  -6  -3    1.79    0.64 
  11  -6  -3    1.21    0.40 
 -11   6   3    0.02    0.58 
  10  -6  -3    1.57    0.39 
  10  -6  -3    1.63    0.61 
 -10   6   3    1.66    0.69 
   9  -6  -3    2.87    0.63 
   9  -6  -3    4.15    0.48 
  -9   6   3    4.20    0.84 
   8  -6  -3    3.78    0.69 
   8  -6  -3    5.44    0.52 
  -8   6   3    5.26    0.79 
   7  -6  -3   -0.05    0.23 
   7  -6  -3    0.05    0.43 
  -7   6   3    0.37    0.47 
   6  -6  -3    0.64    0.26 
  -6   6   3    0.19    0.40 
  -6   6   3    0.18    0.40 
   5  -6  -3    2.58    0.39 
  -5   6   3    3.65    0.66 
  -5   6   3    3.81    0.63 
   4  -6  -3    0.77    0.28 
  -4   6   3    0.32    0.37 
  -4   6   3    1.05    0.49 
   3  -6  -3    1.95    0.39 
  -3   6   3    1.00    0.40 
  -3   6   3    1.66    0.49 
   2  -6  -3   47.41    2.86 
  -2   6   3   48.87    2.98 
  -2   6   3   49.84    2.88 
  -1   6   3    3.18    0.51 
  -1   6   3    4.18    0.56 
  -1   6   3    3.94    0.66 
   0   6   3    0.74    0.42 
   0   6   3    0.26    0.36 
   0   6   3    0.09    0.38 
   1   6   3   13.60    1.18 
   1   6   3   12.00    1.03 
   1   6   3   13.63    1.14 
  -2  -6  -3    1.88    0.49 
   2   6   3    2.64    0.64 
   2   6   3    1.82    0.56 
  -3  -6  -3    2.39    0.55 
   3   6   3    1.42    0.55 
   3   6   3    1.43    0.57 
  -4  -6  -3   18.68    1.51 
   4   6   3   21.04    1.77 
   4   6   3   20.59    1.57 
  -5  -6  -3    0.46    0.50 
   5   6   3    1.49    0.67 
   5   6   3    0.46    0.52 
  -6  -6  -3    0.36    0.54 
   6   6   3    0.40    0.50 
   6   6   3    0.07    0.66 
  -7  -6  -3    1.01    0.65 
   7   6   3    2.23    0.82 
   7   6   3    2.31    0.63 
  -8  -6  -3   -0.23    0.58 
   8   6   3    0.76    0.61 
   8   6   3    0.90    0.74 
  -9  -6  -3    0.95    0.71 
   9   6   3    0.65    0.77 
 -10  -6  -3   -0.30    0.64 
  10   6   3   -0.26    0.82 
  17  -7  -3   -0.58    0.82 
 -17   7   3    0.18    0.74 
  16  -7  -3   -0.29    0.69 
 -16   7   3    0.13    0.82 
  15  -7  -3    0.45    0.45 
  15  -7  -3    2.91    0.87 
 -15   7   3    1.45    0.88 
  14  -7  -3    0.95    0.71 
  14  -7  -3    0.65    0.44 
 -14   7   3    1.04    0.76 
  13  -7  -3    0.55    0.39 
  13  -7  -3    1.57    0.71 
 -13   7   3    1.18    0.80 
  12  -7  -3   -0.26    0.59 
  12  -7  -3    0.82    0.35 
 -12   7   3   -0.64    0.57 
  11  -7  -3    0.23    0.30 
  11  -7  -3   -0.14    0.54 
 -11   7   3   -0.07    0.61 
  10  -7  -3    3.75    0.48 
  10  -7  -3    2.95    0.73 
 -10   7   3    4.09    0.88 
   9  -7  -3    0.93    0.55 
   9  -7  -3    0.42    0.26 
  -9   7   3   -0.57    0.52 
   8  -7  -3   17.12    1.42 
   8  -7  -3   17.16    1.08 
  -8   7   3   15.97    1.38 
   7  -7  -3   10.20    0.71 
   7  -7  -3    8.79    1.00 
  -7   7   3    7.52    0.95 
   6  -7  -3    0.36    0.25 
  -6   7   3    0.52    0.47 
  -6   7   3    0.31    0.44 
   5  -7  -3    0.67    0.31 
  -5   7   3    0.54    0.50 
  -5   7   3    1.78    0.52 
   4  -7  -3    0.53    0.31 
  -4   7   3   -0.71    0.39 
  -4   7   3    0.27    0.41 
   3  -7  -3    1.32    0.37 
  -3   7   3    1.29    0.49 
  -3   7   3    1.84    0.50 
   2  -7  -3    1.64    0.41 
  -2   7   3    1.71    0.49 
  -2   7   3    2.30    0.61 
  -1   7   3    0.29    0.39 
  -1   7   3    0.46    0.39 
  -1   7   3    0.08    0.38 
   0   7   3   -0.74    0.36 
   0   7   3    0.67    0.44 
   0   7   3    0.11    0.39 
   1   7   3    4.47    0.70 
   1   7   3    3.15    0.65 
   1   7   3    4.78    0.76 
  -2  -7  -3    0.69    0.42 
   2   7   3    0.79    0.54 
   2   7   3    1.30    0.62 
  -3  -7  -3   18.25    1.42 
   3   7   3   18.90    1.63 
   3   7   3   14.67    1.41 
  -4  -7  -3    0.71    0.53 
   4   7   3    0.19    0.65 
   4   7   3    0.04    0.51 
  -5  -7  -3   11.59    1.34 
   5   7   3   13.11    1.46 
   5   7   3   13.35    1.33 
  -6  -7  -3    0.49    0.55 
   6   7   3    0.71    0.67 
   6   7   3    0.87    0.55 
  -7  -7  -3    0.05    0.55 
   7   7   3    0.02    0.78 
   7   7   3    0.62    0.55 
  -8  -7  -3    0.12    0.65 
   8   7   3    2.74    0.99 
  -9  -7  -3    0.82    0.71 
   9   7   3    1.35    0.95 
  17  -8  -3    3.21    1.06 
 -17   8   3    1.17    0.97 
  16  -8  -3    0.60    0.77 
 -16   8   3    0.07    0.81 
  15  -8  -3    0.75    0.73 
 -15   8   3    0.55    0.78 
  14  -8  -3    0.14    0.64 
  14  -8  -3   -0.31    0.51 
 -14   8   3   -0.36    0.59 
  13  -8  -3    3.23    0.50 
  13  -8  -3    2.48    0.84 
 -13   8   3    1.28    0.77 
  12  -8  -3    2.43    0.73 
  12  -8  -3    0.57    0.32 
 -12   8   3    0.12    0.66 
  11  -8  -3    0.02    0.27 
  11  -8  -3    0.21    0.59 
 -11   8   3    0.10    0.63 
  10  -8  -3    1.59    0.66 
  10  -8  -3    0.68    0.30 
 -10   8   3    0.81    0.55 
   9  -8  -3    0.31    0.56 
   9  -8  -3    0.13    0.24 
  -9   8   3   -0.09    0.48 
   8  -8  -3    1.38    0.66 
   8  -8  -3    1.53    0.30 
  -8   8   3    1.51    0.58 
   7  -8  -3    1.48    0.30 
   7  -8  -3    1.39    0.64 
  -7   8   3    1.18    0.52 
   6  -8  -3   -0.01    0.23 
  -6   8   3    0.10    0.51 
  -6   8   3    0.62    0.48 
   5  -8  -3    4.68    0.55 
  -5   8   3    5.35    0.77 
  -5   8   3    4.44    0.81 
   4  -8  -3    1.81    0.40 
  -4   8   3    1.12    0.53 
  -4   8   3    1.78    0.55 
   3  -8  -3    0.88    0.34 
  -3   8   3   -0.10    0.49 
  -3   8   3    1.03    0.46 
   2  -8  -3    0.89    0.39 
  -2   8   3    0.05    0.38 
  -2   8   3    0.81    0.52 
  -1   8   3    2.52    0.56 
  -1   8   3    2.05    0.56 
  -1   8   3    2.90    0.65 
   0   8   3    9.64    1.03 
   0   8   3    8.75    0.99 
   0   8   3   10.13    1.10 
   1   8   3    9.98    1.09 
   1   8   3    8.44    1.06 
   1   8   3   11.98    1.19 
  -2  -8  -3   -0.01    0.45 
   2   8   3    0.29    0.47 
   2   8   3   -0.30    0.50 
  -3  -8  -3    1.63    0.58 
   3   8   3    0.06    0.69 
   3   8   3    0.10    0.52 
  -4  -8  -3    1.21    0.59 
   4   8   3    0.02    0.47 
   4   8   3    0.89    0.71 
  -5  -8  -3    0.29    0.54 
   5   8   3    1.23    0.70 
   5   8   3   -0.51    0.50 
   6   8   3    1.45    0.61 
   6   8   3    0.78    0.73 
  -7  -8  -3    0.72    0.62 
   7   8   3    0.02    0.71 
  -8  -8  -3    0.83    0.70 
   8   8   3    0.92    0.85 
  17  -9  -3    0.68    0.83 
 -17   9   3    0.13    0.76 
  16  -9  -3    1.06    0.76 
 -16   9   3    0.92    0.87 
  15  -9  -3    0.53    0.74 
 -15   9   3    0.82    0.82 
  14  -9  -3    0.35    0.69 
 -14   9   3   -1.18    0.67 
  13  -9  -3    0.30    0.70 
 -13   9   3   -1.19    0.60 
  12  -9  -3   -0.03    0.64 
 -12   9   3    0.36    0.68 
  11  -9  -3   -0.46    0.58 
  11  -9  -3   -0.17    0.26 
 -11   9   3    0.02    0.61 
  10  -9  -3    0.45    0.63 
  10  -9  -3    0.22    0.24 
 -10   9   3    0.72    0.58 
   9  -9  -3    3.98    0.41 
   9  -9  -3    3.88    0.82 
  -9   9   3    3.06    0.76 
   8  -9  -3   14.82    1.35 
   8  -9  -3   13.97    0.96 
  -8   9   3   15.08    1.38 
   7  -9  -3    0.92    0.29 
   7  -9  -3    2.61    0.74 
  -7   9   3    0.95    0.51 
   6  -9  -3    1.78    0.37 
  -6   9   3    3.11    0.69 
  -6   9   3    1.80    0.65 
   5  -9  -3    2.49    0.45 
  -5   9   3    1.65    0.59 
  -5   9   3    2.37    0.61 
   4  -9  -3    0.28    0.32 
  -4   9   3    0.24    0.46 
  -4   9   3    0.23    0.56 
   3  -9  -3    8.06    0.84 
  -3   9   3    9.36    1.03 
  -3   9   3    6.45    1.01 
   2  -9  -3   -0.08    0.35 
  -2   9   3   -0.70    0.44 
  -2   9   3    0.16    0.55 
  -1   9   3   17.61    1.52 
  -1   9   3   20.93    1.54 
  -1   9   3   17.75    1.59 
   0   9   3    5.16    0.83 
   0   9   3    4.84    0.82 
   0   9   3    5.56    0.91 
   1   9   3    0.03    0.60 
   1   9   3    0.24    0.58 
   1   9   3    0.30    0.54 
  -2  -9  -3    2.98    0.67 
   2   9   3    2.25    0.68 
   2   9   3    1.15    0.65 
  -3  -9  -3   -0.75    0.40 
   3   9   3   -0.08    0.51 
   3   9   3    0.04    0.67 
  -4  -9  -3    2.16    0.65 
   4   9   3    1.99    0.64 
   4   9   3    0.10    0.74 
  -5  -9  -3    0.09    0.51 
   5   9   3    0.87    0.64 
   5   9   3   -1.60    0.67 
  -6  -9  -3   -0.36    0.51 
   6   9   3    0.18    0.72 
  -7  -9  -3    0.57    0.63 
   7   9   3    0.32    0.89 
  17 -10  -3    2.51    0.96 
 -17  10   3   -0.14    0.71 
  16 -10  -3   -0.26    0.67 
 -16  10   3    0.65    0.80 
  15 -10  -3    1.39    0.82 
 -15  10   3    1.20    0.88 
  14 -10  -3    0.50    0.71 
 -14  10   3   -0.60    0.66 
  13 -10  -3    1.75    0.78 
 -13  10   3    2.42    0.84 
  12 -10  -3   -0.02    0.67 
 -12  10   3   -0.20    0.55 
  11 -10  -3    0.42    0.65 
 -11  10   3    0.76    0.73 
  10 -10  -3   -0.60    0.62 
 -10  10   3   -0.34    0.52 
   9 -10  -3    1.35    0.27 
   9 -10  -3    0.46    0.64 
  -9  10   3    1.38    0.64 
   8 -10  -3    2.14    0.77 
   8 -10  -3    1.27    0.29 
  -8  10   3    0.45    0.59 
   7 -10  -3    9.76    0.78 
   7 -10  -3   11.19    1.33 
  -7  10   3    8.51    1.08 
   6 -10  -3    0.05    0.29 
  -6  10   3    0.36    0.60 
  -6  10   3   -0.11    0.53 
   5 -10  -3    0.26    0.33 
  -5  10   3   -0.37    0.49 
  -5  10   3   -0.31    0.48 
   4 -10  -3    0.79    0.38 
  -4  10   3   -0.12    0.55 
  -4  10   3    1.15    0.60 
   3 -10  -3    6.58    0.83 
  -3  10   3    8.17    1.02 
  -3  10   3    8.77    1.14 
   2 -10  -3    5.31    0.74 
  -2  10   3    3.98    0.87 
  -2  10   3    5.93    0.91 
  -1  10   3    0.42    0.55 
  -1  10   3    0.02    0.58 
  -1  10   3    0.55    0.59 
   0  10   3    0.84    0.60 
   0  10   3    0.19    0.59 
   0  10   3    0.83    0.63 
   1  10   3    2.67    0.80 
   1  10   3    2.17    0.73 
  -2 -10  -3    0.86    0.56 
   2  10   3    0.55    0.67 
   2  10   3   -0.24    0.53 
  -3 -10  -3   -0.17    0.43 
   3  10   3   -0.89    0.58 
   3  10   3   -0.44    0.53 
  -4 -10  -3    0.30    0.55 
   4  10   3    0.54    0.60 
   4  10   3    0.06    0.81 
  -5 -10  -3   -0.75    0.46 
   5  10   3   -0.40    0.72 
   5  10   3   -0.72    0.64 
  -6 -10  -3    0.29    0.61 
   6  10   3   -0.12    0.88 
  17 -11  -3    2.98    1.03 
 -17  11   3    0.12    0.84 
  16 -11  -3   -1.75    0.63 
 -16  11   3    0.08    0.73 
  15 -11  -3    3.90    1.06 
 -15  11   3    5.49    1.17 
  14 -11  -3    3.28    0.99 
 -14  11   3    4.35    1.10 
  13 -11  -3    1.79    0.85 
 -13  11   3    3.48    0.92 
  12 -11  -3    0.27    0.69 
 -12  11   3    0.91    0.71 
  11 -11  -3    5.50    1.05 
 -11  11   3    4.88    0.96 
  10 -11  -3    3.26    0.88 
 -10  11   3    2.51    0.77 
   9 -11  -3    2.76    0.84 
  -9  11   3    2.16    0.68 
   8 -11  -3    1.58    0.75 
   8 -11  -3    0.51    0.27 
  -8  11   3    0.54    0.62 
   7 -11  -3    0.88    0.33 
   7 -11  -3    1.35    0.77 
  -7  11   3    0.35    0.64 
   6 -11  -3    1.05    0.40 
  -6  11   3    1.59    0.69 
  -6  11   3    1.30    0.71 
   5 -11  -3    2.04    0.47 
  -5  11   3    1.29    0.65 
  -5  11   3    2.58    0.72 
   4 -11  -3    6.42    0.76 
  -4  11   3    6.75    1.04 
  -4  11   3    4.59    0.91 
   3 -11  -3    2.22    0.57 
  -3  11   3    2.52    0.80 
  -3  11   3    2.31    0.73 
   2 -11  -3    0.01    0.45 
  -2  11   3   -0.01    0.65 
  -2  11   3    1.40    0.68 
  -1  11   3    0.93    0.60 
  -1  11   3    1.37    0.64 
  -1  11   3    0.47    0.65 
   0  11   3    6.65    1.02 
   0  11   3    4.49    0.91 
   0  11   3    4.68    0.92 
  -1 -11  -3   -0.33    0.42 
   1  11   3   -1.13    0.49 
   1  11   3    0.73    0.66 
  -2 -11  -3    0.27    0.53 
   2  11   3   -0.20    0.64 
   2  11   3    0.48    0.63 
  -3 -11  -3    0.85    0.61 
   3  11   3    1.15    0.85 
   3  11   3    2.23    0.75 
  -4 -11  -3    1.93    0.72 
   4  11   3    2.24    0.77 
   4  11   3    3.30    0.92 
  16 -12  -3    0.63    0.84 
 -16  12   3    0.53    0.87 
  15 -12  -3   -0.41    0.80 
 -15  12   3    0.35    0.74 
  14 -12  -3    0.63    0.79 
 -14  12   3    1.18    0.79 
  13 -12  -3    0.90    0.77 
 -13  12   3   -0.66    0.73 
  12 -12  -3   -0.65    0.67 
 -12  12   3    0.94    0.69 
  11 -12  -3    0.83    0.71 
 -11  12   3    1.00    0.77 
  10 -12  -3   -0.25    0.76 
 -10  12   3    1.65    0.76 
   9 -12  -3    1.11    0.76 
  -9  12   3    0.05    0.62 
   8 -12  -3    2.07    0.83 
  -8  12   3    2.24    0.75 
   7 -12  -3    0.06    0.30 
   7 -12  -3    0.28    0.71 
  -7  12   3    0.39    0.61 
   6 -12  -3   11.83    1.00 
  -6  12   3   10.27    1.30 
   5 -12  -3    3.12    0.57 
  -5  12   3    1.14    0.78 
  -5  12   3    2.87    0.83 
   4 -12  -3    1.99    0.55 
  -4  12   3    1.76    0.72 
  -4  12   3    1.55    0.74 
   3 -12  -3    3.38    0.67 
  -3  12   3    2.49    0.82 
  -3  12   3    3.19    0.86 
   2 -12  -3    0.14    0.49 
  -2  12   3    0.40    0.67 
  -2  12   3    0.23    0.65 
  -1  12   3    1.98    0.75 
  -1  12   3    1.47    0.69 
  -1  12   3    1.98    0.77 
   0  12   3    0.18    0.58 
   0  12   3   -0.51    0.62 
   0  12   3   -0.88    0.60 
  -1 -12  -3    1.46    0.66 
   1  12   3    1.07    0.78 
   1  12   3    2.19    0.85 
  -2 -12  -3    0.53    0.62 
   2  12   3    0.79    0.84 
   2  12   3    0.56    0.69 
  -3 -12  -3    2.22    0.73 
   3  12   3    0.45    0.86 
   3  12   3    0.21    0.69 
  16 -13  -3    3.56    1.07 
 -16  13   3    1.83    0.95 
  15 -13  -3    2.41    0.97 
 -15  13   3    1.63    0.93 
  14 -13  -3   -0.66    0.71 
 -14  13   3    0.78    0.72 
  13 -13  -3    2.90    0.98 
 -13  13   3    0.02    0.66 
  12 -13  -3   -0.31    0.74 
 -12  13   3    0.26    0.66 
  11 -13  -3    0.10    0.76 
 -11  13   3    0.40    0.65 
  10 -13  -3    0.58    0.79 
 -10  13   3   -0.18    0.65 
   9 -13  -3    0.28    0.74 
  -9  13   3    0.29    0.57 
   8 -13  -3    1.74    0.84 
  -8  13   3    0.39    0.58 
   7 -13  -3   -0.24    0.63 
  -7  13   3    0.74    0.66 
   6 -13  -3    0.58    0.41 
   6 -13  -3   -1.04    0.63 
  -6  13   3   -0.34    0.63 
   5 -13  -3    3.55    0.63 
  -5  13   3    3.25    0.86 
  -5  13   3    4.57    0.92 
   4 -13  -3    5.90    0.80 
  -4  13   3    5.42    1.06 
  -4  13   3    4.39    0.96 
   3 -13  -3   -0.10    0.44 
  -3  13   3   -0.13    0.65 
  -3  13   3    0.08    0.67 
   2 -13  -3    0.88    0.54 
  -2  13   3    0.56    0.70 
  -2  13   3    0.20    0.77 
   1 -13  -3    1.15    0.61 
  -1  13   3   -0.89    0.57 
  -1  13   3    1.42    0.78 
   0  13   3   -0.13    0.67 
   0  13   3    0.66    0.75 
   0  13   3    1.19    0.77 
  -1 -13  -3   -0.35    0.46 
   1  13   3    0.18    0.72 
   1  13   3   -0.83    0.62 
  -2 -13  -3    0.36    0.58 
   2  13   3    0.77    0.75 
   2  13   3   -0.04    0.82 
  15 -14  -3    2.94    1.08 
 -15  14   3    3.38    1.12 
  14 -14  -3    3.77    1.12 
 -14  14   3    1.65    0.90 
  13 -14  -3    0.78    0.87 
 -13  14   3   -0.06    0.73 
  12 -14  -3    0.99    0.88 
 -12  14   3    0.31    0.71 
  11 -14  -3    2.42    0.95 
 -11  14   3    1.47    0.80 
  10 -14  -3    1.08    0.89 
 -10  14   3    1.08    0.74 
   9 -14  -3    2.58    0.97 
  -9  14   3    1.37    0.82 
   8 -14  -3    0.56    0.86 
  -8  14   3    0.54    0.68 
   7 -14  -3   12.26    1.52 
  -7  14   3    7.17    1.22 
   6 -14  -3   -0.56    0.69 
  -6  14   3    0.71    0.76 
   5 -14  -3   -0.07    0.40 
   5 -14  -3   -0.11    0.76 
  -5  14   3   -0.08    0.62 
   4 -14  -3    0.73    0.46 
  -4  14   3    0.15    0.71 
  -4  14   3   -0.53    0.72 
   3 -14  -3    1.06    0.53 
  -3  14   3    3.28    0.94 
  -3  14   3    1.45    0.87 
   2 -14  -3   -0.24    0.48 
  -2  14   3   -0.21    0.69 
  -2  14   3   -0.26    0.69 
   1 -14  -3   -0.58    0.46 
  -1  14   3   -0.16    0.69 
  -1  14   3    0.24    0.75 
   0 -14  -3    0.19    0.55 
   0 -14  -3    0.50    0.62 
   0  14   3    0.24    0.76 
  14 -15  -3    0.88    0.95 
 -14  15   3   -0.25    0.70 
  13 -15  -3   -0.46    0.84 
 -13  15   3    1.48    0.90 
  12 -15  -3    0.15    0.81 
 -12  15   3    0.36    0.79 
  11 -15  -3    2.01    1.02 
 -11  15   3    2.87    0.92 
  10 -15  -3    1.02    0.94 
 -10  15   3    0.74    0.75 
   9 -15  -3   11.07    1.55 
  -9  15   3    7.74    1.30 
   8 -15  -3   -0.31    0.74 
  -8  15   3   -0.01    0.61 
   7 -15  -3    3.51    1.04 
  -7  15   3    3.50    0.99 
   6 -15  -3    0.43    0.73 
  -6  15   3   -0.41    0.71 
   5 -15  -3    1.58    0.89 
  -5  15   3    0.50    0.77 
   4 -15  -3    2.84    0.98 
  -4  15   3    2.63    1.03 
   3 -15  -3    0.78    0.53 
  -3  15   3    0.17    0.81 
   2 -15  -3    1.61    0.65 
  -2  15   3   -0.16    0.79 
  -2  15   3    1.12    0.87 
  13 -16  -3   -0.76    0.86 
 -13  16   3   -0.25    0.83 
  12 -16  -3    0.57    0.93 
 -12  16   3   -0.31    0.67 
  11 -16  -3    2.70    1.07 
 -11  16   3    0.11    0.78 
  10 -16  -3    1.04    0.92 
 -10  16   3    1.20    0.86 
   9 -16  -3    0.47    0.87 
  -9  16   3    0.74    0.82 
   8 -16  -3    1.26    0.84 
  -8  16   3    1.15    0.85 
   7 -16  -3    5.07    1.19 
  -7  16   3    3.85    1.09 
   6 -16  -3    0.12    0.84 
  -6  16   3   -0.25    0.82 
   5 -16  -3    0.82    0.85 
  -5  16   3   -0.05    0.84 
   4 -16  -3    0.59    0.82 
  -4  16   3    1.37    0.96 
  -8  19  -4    0.93    0.81 
   8 -19   4    1.47    1.02 
  -9  19  -4    1.54    0.93 
   9 -19   4    3.33    1.18 
  -3  18  -4   -0.81    0.78 
   3 -18   4    0.74    0.84 
  -4  18  -4    0.36    0.81 
   4 -18   4   -1.42    0.72 
  -5  18  -4    0.24    0.81 
   5 -18   4    1.51    0.97 
  -6  18  -4    2.52    0.97 
   6 -18   4    2.84    1.06 
  -7  18  -4   -0.77    0.64 
   7 -18   4   -0.39    0.85 
  -8  18  -4   -0.92    0.72 
   8 -18   4    0.93    0.98 
  -9  18  -4    0.12    0.86 
   9 -18   4    0.54    0.89 
 -10  18  -4    1.20    0.83 
  10 -18   4    0.34    0.94 
 -11  18  -4    1.93    0.84 
  11 -18   4   -0.05    0.98 
 -12  18  -4    0.57    0.76 
  12 -18   4   -1.30    0.93 
  -1  17  -4   -0.70    0.73 
  -1  17  -4    0.84    0.69 
  -2  17  -4    0.13    0.89 
   2 -17   4    1.11    0.79 
  -3  17  -4   -0.31    0.68 
   3 -17   4    1.29    0.82 
  -4  17  -4    0.63    0.92 
   4 -17   4    2.37    0.96 
  -5  17  -4   -0.81    0.76 
   5 -17   4    0.73    0.81 
  -6  17  -4    7.05    1.25 
   6 -17   4    9.26    1.38 
  -7  17  -4    0.34    0.73 
   7 -17   4    2.14    0.92 
  -8  17  -4    0.50    0.81 
   8 -17   4   -0.62    0.83 
  -9  17  -4   -0.67    0.62 
   9 -17   4   -0.37    0.83 
 -10  17  -4    2.29    0.87 
  10 -17   4    2.96    1.03 
 -11  17  -4    0.91    0.84 
  11 -17   4    2.20    1.09 
 -12  17  -4    0.94    0.82 
  12 -17   4    2.41    1.11 
 -13  17  -4    0.24    0.72 
  13 -17   4    0.45    0.98 
 -14  17  -4   -0.27    0.71 
  14 -17   4   -2.39    0.84 
   1  16  -4    0.29    0.78 
  -1 -16   4   -0.10    0.73 
   0  16  -4    0.46    0.70 
   0  16  -4   -0.18    0.86 
  -1  16  -4    0.73    0.66 
  -1  16  -4   -0.59    0.77 
   1 -16   4    0.93    0.71 
  -2  16  -4    1.37    0.93 
  -2  16  -4    0.96    0.61 
   2 -16   4   -0.08    0.71 
  -3  16  -4   -0.42    0.66 
  -3  16  -4   -0.03    0.73 
   3 -16   4    0.03    0.69 
  -4  16  -4    1.84    0.86 
   4 -16   4    0.05    0.72 
  -5  16  -4    2.25    0.95 
   5 -16   4    2.11    0.91 
  -6  16  -4    0.24    0.65 
   6 -16   4    0.82    0.84 
  -7  16  -4   -0.30    0.73 
   7 -16   4   -0.62    0.77 
  -8  16  -4    1.05    0.77 
   8 -16   4   -0.15    0.85 
  -9  16  -4    0.66    0.66 
   9 -16   4    0.64    0.91 
 -10  16  -4   -0.31    0.58 
  10 -16   4   -0.05    0.85 
 -11  16  -4   -0.51    0.67 
  11 -16   4    0.27    0.96 
 -12  16  -4    2.29    0.96 
  12 -16   4    1.46    0.99 
 -13  16  -4    0.33    0.72 
  13 -16   4   -1.39    0.85 
 -14  16  -4    0.87    0.85 
  14 -16   4   -0.06    0.95 
 -15  16  -4    0.38    0.84 
  15 -16   4    1.13    1.10 
   2  15  -4   -0.33    0.75 
  -2 -15   4    0.45    0.77 
   1  15  -4   -0.74    0.61 
  -1 -15   4   -0.30    0.56 
   0  15  -4    0.01    0.62 
   0  15  -4    1.05    0.81 
   0 -15   4    0.11    0.66 
  -1  15  -4    0.11    0.62 
  -1  15  -4   -0.84    0.63 
   1 -15   4   -0.15    0.63 
  -2  15  -4   -0.16    0.66 
  -2  15  -4    0.74    0.57 
   2 -15   4    0.35    0.68 
  -3  15  -4    1.60    0.86 
  -3  15  -4    1.38    0.55 
   3 -15   4    1.07    0.74 
  -4  15  -4    0.66    0.45 
  -4  15  -4   -0.55    0.67 
   4 -15   4    1.07    0.79 
  -5  15  -4    1.92    0.83 
   5 -15   4    2.04    0.90 
  -6  15  -4    2.33    0.93 
   6 -15   4    3.87    1.03 
  -7  15  -4    1.13    0.68 
   7 -15   4   -0.33    0.80 
  -8  15  -4   -0.61    0.52 
   8 -15   4    0.13    0.84 
  -9  15  -4   -0.17    0.55 
   9 -15   4   -0.91    0.77 
 -10  15  -4    0.21    0.63 
  10 -15   4    1.63    0.96 
 -11  15  -4   13.17    1.68 
  11 -15   4   11.77    1.63 
 -12  15  -4    2.53    0.96 
  12 -15   4    1.99    0.98 
 -13  15  -4    0.98    0.78 
  13 -15   4    2.67    1.11 
 -14  15  -4    0.50    0.76 
  14 -15   4   -0.36    0.97 
 -15  15  -4    0.76    0.75 
  15 -15   4   -1.12    0.91 
   4  14  -4    1.92    0.91 
  -4 -14   4    1.94    0.95 
   3  14  -4    0.81    0.79 
  -3 -14   4   -0.06    0.72 
   2  14  -4   -0.83    0.59 
  -2 -14   4    0.66    0.75 
   1  14  -4    0.56    0.85 
   1  14  -4    0.68    0.70 
  -1 -14   4    1.53    0.67 
   0  14  -4    2.24    0.72 
   0  14  -4    1.30    0.79 
   0 -14   4    1.94    0.71 
  -1  14  -4    2.91    0.96 
   1 -14   4    2.26    0.78 
  -2  14  -4    4.93    0.80 
  -2  14  -4    4.51    0.99 
   2 -14   4    4.04    0.89 
  -3  14  -4   -0.09    0.43 
  -3  14  -4    0.93    0.78 
   3 -14   4   -0.06    0.72 
  -4  14  -4    4.60    0.97 
  -4  14  -4    5.05    0.64 
   4 -14   4    3.68    0.94 
  -5  14  -4    0.04    0.38 
  -5  14  -4   -0.46    0.60 
   5 -14   4    0.34    0.75 
  -6  14  -4    0.17    0.61 
   6 -14   4    0.46    0.75 
  -7  14  -4    0.94    0.63 
   7 -14   4    0.85    0.81 
  -8  14  -4    0.64    0.61 
   8 -14   4   -0.38    0.76 
  -9  14  -4    0.59    0.63 
   9 -14   4   -0.07    0.84 
 -10  14  -4   -0.50    0.52 
  10 -14   4    0.57    0.89 
 -11  14  -4    2.26    0.88 
  11 -14   4    2.00    0.93 
 -12  14  -4    0.38    0.67 
  12 -14   4    0.15    0.89 
 -13  14  -4    0.02    0.62 
  13 -14   4    1.36    0.99 
 -14  14  -4    0.74    0.86 
  14 -14   4    0.86    0.98 
 -15  14  -4    1.52    0.87 
  15 -14   4   -0.03    0.95 
 -16  14  -4    7.77    1.41 
  16 -14   4   10.67    1.76 
   5  13  -4    1.72    0.91 
  -5 -13   4    0.85    0.86 
   4  13  -4    0.87    0.78 
  -4 -13   4   -0.31    0.57 
   3  13  -4   -0.58    0.64 
  -3 -13   4   -0.81    0.64 
   2  13  -4    0.55    0.57 
  -2 -13   4    0.56    0.69 
   1  13  -4    0.26    0.60 
   1  13  -4   -0.42    0.62 
  -1 -13   4    0.27    0.55 
   0  13  -4    0.86    0.60 
   0  13  -4   -0.09    0.64 
   0 -13   4   -0.23    0.56 
  -1  13  -4    1.11    0.83 
  -1  13  -4    2.93    0.68 
   1 -13   4    2.52    0.75 
  -2  13  -4   13.12    1.18 
  -2  13  -4   10.11    1.42 
   2 -13   4   11.69    1.33 
  -3  13  -4    5.75    0.73 
  -3  13  -4    6.62    1.05 
   3 -13   4    4.87    0.96 
  -4  13  -4    2.13    0.47 
  -4  13  -4    1.22    0.65 
   4 -13   4    3.06    0.84 
  -5  13  -4    3.34    0.82 
  -5  13  -4    4.73    0.49 
   5 -13   4    2.33    0.85 
  -6  13  -4    1.15    0.68 
   6 -13   4    0.56    0.76 
  -7  13  -4    1.69    0.67 
   7 -13   4   -0.03    0.78 
  -8  13  -4   14.86    1.68 
   8 -13   4   16.17    1.74 
  -9  13  -4    1.27    0.76 
   9 -13   4    1.80    0.92 
 -10  13  -4   -0.42    0.58 
  10 -13   4    0.81    0.79 
 -11  13  -4    0.54    0.65 
  11 -13   4   -0.72    0.83 
 -12  13  -4    0.54    0.65 
  12 -13   4    0.35    0.85 
 -13  13  -4    0.43    0.67 
  13 -13   4    0.31    0.92 
 -14  13  -4    0.84    0.81 
  14 -13   4    2.64    1.06 
 -15  13  -4    0.39    0.78 
  15 -13   4    0.75    1.01 
 -16  13  -4   -0.94    0.70 
  16 -13   4    0.98    1.05 
   6  12  -4    0.62    0.83 
  -6 -12   4    0.50    0.79 
   5  12  -4    0.13    0.76 
  -5 -12   4    1.47    0.88 
   4  12  -4   -0.45    0.58 
  -4 -12   4    1.65    0.87 
   3  12  -4    4.30    0.87 
  -3 -12   4    3.14    0.94 
   2  12  -4   -0.08    0.60 
  -2 -12   4   -0.31    0.47 
  -2 -12   4    0.48    0.74 
   1  12  -4   -0.53    0.66 
   1  12  -4    0.47    0.58 
  -1 -12   4    0.91    0.58 
   0  12  -4   -0.31    0.49 
   0  12  -4    0.41    0.71 
   0 -12   4    0.22    0.53 
  -1  12  -4   -0.49    0.43 
  -1  12  -4    1.18    0.67 
   1 -12   4    0.01    0.55 
  -2  12  -4    4.19    0.95 
  -2  12  -4    3.97    0.64 
   2 -12   4    4.09    0.85 
  -3  12  -4   -0.69    0.34 
  -3  12  -4    0.33    0.59 
   3 -12   4    1.78    0.70 
  -4  12  -4    4.91    0.93 
  -4  12  -4    6.76    0.65 
   4 -12   4    7.08    1.04 
  -5  12  -4    6.13    1.00 
  -5  12  -4    5.64    0.52 
   5 -12   4    3.79    0.94 
  -6  12  -4    2.43    0.69 
   6 -12   4    2.35    0.81 
  -7  12  -4    0.94    0.63 
   7 -12   4    0.87    0.73 
  -8  12  -4    0.85    0.64 
   8 -12   4    1.12    0.76 
  -9  12  -4    0.32    0.62 
   9 -12   4    1.01    0.81 
 -10  12  -4    0.25    0.62 
  10 -12   4   -0.08    0.75 
 -11  12  -4    0.82    0.63 
  11 -12   4    0.47    0.76 
 -12  12  -4    7.38    1.24 
  12 -12   4    9.03    1.39 
 -13  12  -4   -0.51    0.60 
  13 -12   4    1.93    0.98 
 -14  12  -4    2.45    0.90 
  14 -12   4    1.78    0.96 
 -15  12  -4    2.15    0.87 
  15 -12   4    2.88    1.11 
 -16  12  -4    3.22    1.01 
  16 -12   4    3.52    1.17 
   7  11  -4    0.23    0.83 
  -7 -11   4   -0.21    0.62 
   6  11  -4    1.34    0.84 
  -6 -11   4    1.83    0.80 
   5  11  -4   -0.04    0.60 
  -5 -11   4   -0.68    0.63 
   4  11  -4   -0.41    0.62 
  -4 -11   4   -0.36    0.69 
   3  11  -4   14.72    1.54 
  -3 -11   4   14.46    1.25 
  -3 -11   4   18.35    1.86 
   2  11  -4    0.91    0.66 
  -2 -11   4    0.82    0.50 
   1  11  -4    7.47    1.00 
   1  11  -4    9.88    1.31 
  -1 -11   4    5.95    0.83 
   0  11  -4    0.18    0.49 
   0  11  -4    0.60    0.69 
   0 -11   4    0.41    0.50 
  -1  11  -4    5.37    0.97 
  -1  11  -4    3.02    0.62 
   1 -11   4    3.73    0.69 
  -2  11  -4    5.69    0.68 
  -2  11  -4    5.86    0.95 
   2 -11   4    3.93    0.81 
  -3  11  -4    3.99    0.53 
  -3  11  -4    4.17    0.84 
   3 -11   4    3.73    0.78 
  -4  11  -4    2.90    0.42 
  -4  11  -4    2.97    0.76 
   4 -11   4    4.02    0.80 
  -5  11  -4   13.01    1.26 
  -5  11  -4   13.51    0.87 
   5 -11   4   13.90    1.32 
  -6  11  -4    3.03    0.72 
   6 -11   4    1.08    0.65 
  -7  11  -4    3.58    0.81 
   7 -11   4    3.39    0.88 
  -8  11  -4    7.24    1.10 
   8 -11   4    7.30    1.09 
  -9  11  -4    0.60    0.60 
   9 -11   4    2.33    0.85 
 -10  11  -4    1.16    0.63 
  10 -11   4    0.45    0.80 
 -11  11  -4   14.74    1.68 
  11 -11   4   20.37    1.85 
 -12  11  -4   19.14    1.98 
  12 -11   4   18.04    1.91 
 -13  11  -4    1.87    0.79 
  13 -11   4    3.45    1.07 
 -14  11  -4    7.14    1.27 
  14 -11   4    6.60    1.35 
 -15  11  -4    0.89    0.80 
  15 -11   4    1.68    0.99 
 -16  11  -4   -0.95    0.60 
  16 -11   4   -1.21    0.80 
   8  10  -4    0.36    0.71 
  -8 -10   4    0.46    0.79 
   7  10  -4   -0.36    0.65 
  -7 -10   4    0.78    0.68 
   6  10  -4    0.62    0.65 
  -6 -10   4   -0.13    0.70 
   5  10  -4    2.26    0.78 
  -5 -10   4    1.23    0.75 
   4  10  -4    4.50    0.89 
  -4 -10   4    2.85    0.86 
   3  10  -4   -0.08    0.58 
  -3 -10   4    0.92    0.43 
   2  10  -4    3.28    0.75 
   2  10  -4    4.59    0.91 
  -2 -10   4    4.40    0.64 
   1  10  -4    2.13    0.77 
   1  10  -4    2.94    0.68 
  -1 -10   4    3.18    0.58 
   0  10  -4    0.01    0.38 
   0  10  -4   -0.34    0.47 
   0 -10   4   -0.02    0.43 
  -1  10  -4   -0.08    0.38 
  -1  10  -4   -0.21    0.54 
   1 -10   4   -0.66    0.43 
  -2  10  -4    0.48    0.48 
  -2  10  -4    0.52    0.35 
   2 -10   4    0.45    0.54 
  -3  10  -4    3.48    0.48 
  -3  10  -4    5.39    0.85 
   3 -10   4    5.54    0.84 
  -4  10  -4    8.70    1.02 
  -4  10  -4    6.59    0.59 
   4 -10   4    6.71    0.93 
  -5  10  -4    0.35    0.48 
  -5  10  -4    0.76    0.21 
   5 -10   4    1.63    0.66 
  -6  10  -4    2.63    0.68 
   6 -10   4    1.65    0.64 
  -7  10  -4    0.65    0.51 
   7 -10   4   -0.54    0.62 
  -8  10  -4    0.23    0.46 
   8 -10   4    0.03    0.63 
  -9  10  -4    0.92    0.63 
   9 -10   4   -0.06    0.70 
 -10  10  -4    1.56    0.72 
  10 -10   4    2.11    0.86 
 -11  10  -4   -0.17    0.58 
  11 -10   4    0.14    0.78 
 -12  10  -4   13.52    1.58 
  12 -10   4   14.31    1.70 
 -13  10  -4    3.50    0.92 
  13 -10   4    3.00    0.99 
 -14  10  -4   -0.05    0.68 
  14 -10   4   -0.31    0.82 
 -15  10  -4   -0.08    0.66 
  15 -10   4   -0.23    0.84 
 -16  10  -4    0.43    0.76 
  16 -10   4   -0.14    0.88 
   9   9  -4    1.47    0.89 
  -9  -9   4    0.96    0.89 
   8   9  -4    0.30    0.82 
  -8  -9   4    0.90    0.73 
   7   9  -4    3.72    0.94 
  -7  -9   4    3.52    1.01 
   6   9  -4    0.31    0.63 
  -6  -9   4    0.19    0.61 
   5   9  -4    0.21    0.70 
  -5  -9   4    0.22    0.60 
   4   9  -4   16.77    1.51 
  -4  -9   4   12.00    1.50 
  -4  -9   4   14.54    1.06 
   3   9  -4   36.97    2.46 
  -3  -9   4   33.45    2.51 
  -3  -9   4   36.81    2.19 
   2   9  -4    0.21    0.45 
   2   9  -4    0.35    0.59 
  -2  -9   4   -0.31    0.35 
   1   9  -4    0.29    0.51 
   1   9  -4    0.28    0.42 
  -1  -9   4    0.05    0.36 
   0   9  -4    4.02    0.76 
   0   9  -4    3.39    0.57 
   0  -9   4    3.46    0.61 
  -1   9  -4   -0.13    0.44 
  -1   9  -4    0.41    0.33 
   1  -9   4   -0.16    0.41 
  -2   9  -4   12.55    0.96 
  -2   9  -4   12.96    1.21 
   2  -9   4   13.57    1.20 
  -3   9  -4    4.68    0.76 
  -3   9  -4    5.16    0.51 
   3  -9   4    4.74    0.77 
  -4   9  -4    0.68    0.44 
  -4   9  -4    0.66    0.24 
   4  -9   4   -0.17    0.51 
  -5   9  -4    1.53    0.23 
  -5   9  -4    1.13    0.48 
   5  -9   4    1.52    0.57 
  -6   9  -4   19.33    1.60 
   6  -9   4   23.09    1.72 
  -7   9  -4   23.22    1.70 
   7  -9   4   22.45    1.81 
  -8   9  -4    1.04    0.18 
  -8   9  -4    0.89    0.58 
   8  -9   4    0.34    0.64 
  -9   9  -4   12.50    0.81 
  -9   9  -4   11.93    1.38 
   9  -9   4   12.52    1.35 
 -10   9  -4   12.00    0.83 
 -10   9  -4    9.18    1.24 
  10  -9   4   11.17    1.35 
 -11   9  -4   30.59    1.82 
 -11   9  -4   27.77    2.23 
  11  -9   4   29.05    2.33 
 -12   9  -4    1.41    0.40 
 -12   9  -4    0.57    0.61 
  12  -9   4    0.45    0.79 
 -13   9  -4   -0.27    0.60 
 -13   9  -4    1.73    0.52 
  13  -9   4    0.78    0.80 
 -14   9  -4   -0.44    0.64 
  14  -9   4    1.20    0.85 
 -15   9  -4   -0.56    0.54 
  15  -9   4   -0.64    0.79 
 -16   9  -4    1.70    0.84 
  16  -9   4   -0.56    0.73 
  10   8  -4    1.23    0.82 
 -10  -8   4    0.68    0.82 
   9   8  -4   -0.58    0.74 
  -9  -8   4   -0.86    0.69 
   8   8  -4    3.42    0.89 
  -8  -8   4    1.13    0.76 
   7   8  -4    0.85    0.70 
  -7  -8   4    0.60    0.67 
   6   8  -4   -0.04    0.67 
  -6  -8   4    0.59    0.74 
   5   8  -4    3.69    0.80 
  -5  -8   4    4.51    0.93 
   4   8  -4   25.76    1.96 
  -4  -8   4   25.85    1.57 
  -4  -8   4   25.09    2.05 
   3   8  -4    3.76    0.73 
  -3  -8   4    4.19    0.50 
  -3  -8   4    2.13    0.66 
   2   8  -4    1.49    0.51 
   2   8  -4    0.34    0.50 
  -2  -8   4    0.83    0.36 
   1   8  -4    2.16    0.50 
   1   8  -4    1.28    0.56 
  -1  -8   4    0.44    0.38 
   0   8  -4    0.67    0.38 
   0   8  -4    0.54    0.51 
   0  -8   4    0.58    0.44 
  -1   8  -4   26.43    1.88 
  -1   8  -4   26.38    1.66 
   1  -8   4   25.72    1.75 
  -2   8  -4    2.85    0.41 
  -2   8  -4    2.49    0.58 
   2  -8   4    2.25    0.57 
  -3   8  -4   10.42    0.77 
  -3   8  -4   10.24    1.04 
   3  -8   4   11.31    1.07 
  -4   8  -4    2.03    0.53 
  -4   8  -4    1.38    0.27 
   4  -8   4    1.77    0.57 
  -5   8  -4    3.56    0.32 
  -5   8  -4    3.96    0.66 
   5  -8   4    2.68    0.64 
  -6   8  -4    0.57    0.44 
  -6   8  -4   -0.07    0.15 
   6  -8   4   -0.32    0.46 
  -7   8  -4    5.50    0.43 
  -7   8  -4    4.45    0.76 
   7  -8   4    4.60    0.81 
  -8   8  -4    6.39    0.53 
  -8   8  -4    6.88    0.95 
   8  -8   4    7.25    1.02 
  -9   8  -4    0.66    0.28 
  -9   8  -4    1.73    0.59 
   9  -8   4    1.34    0.71 
 -10   8  -4    6.40    0.63 
 -10   8  -4    5.94    0.95 
  10  -8   4    4.06    0.92 
 -11   8  -4    7.08    0.72 
 -11   8  -4    3.79    0.89 
  11  -8   4    5.74    1.07 
 -12   8  -4    0.42    0.58 
  12  -8   4    0.72    0.77 
 -13   8  -4   -0.44    0.55 
  13  -8   4    1.06    0.43 
  13  -8   4    0.75    0.84 
 -14   8  -4    0.98    0.72 
  14  -8   4    0.80    0.87 
  14  -8   4    1.01    0.48 
 -15   8  -4   -0.33    0.62 
  15  -8   4   -0.34    0.72 
 -16   8  -4    0.16    0.69 
  16  -8   4    0.20    0.85 
  11   7  -4    0.49    0.82 
 -11  -7   4    0.28    0.85 
  10   7  -4    1.93    0.80 
 -10  -7   4    0.47    0.78 
   9   7  -4   -0.31    0.61 
  -9  -7   4    0.27    0.78 
   8   7  -4    2.16    0.78 
  -8  -7   4    1.81    0.85 
   7   7  -4    7.07    1.12 
  -7  -7   4    7.41    1.24 
   6   7  -4    1.24    0.71 
  -6  -7   4    0.49    0.60 
   5   7  -4    2.03    0.62 
  -5  -7   4    3.33    0.77 
   4   7  -4    0.16    0.44 
  -4  -7   4    0.66    0.26 
  -4  -7   4   -0.22    0.55 
   3   7  -4    1.42    0.52 
  -3  -7   4    2.23    0.35 
  -3  -7   4    0.51    0.55 
   2   7  -4    0.31    0.44 
   2   7  -4   -0.59    0.37 
  -2  -7   4    0.18    0.30 
   1   7  -4    3.01    0.53 
   1   7  -4    2.01    0.56 
  -1  -7   4    2.63    0.46 
   0   7  -4   12.49    1.05 
   0   7  -4   10.93    0.91 
   0  -7   4   10.54    0.92 
  -1   7  -4   13.96    1.01 
  -1   7  -4   14.45    1.16 
   1  -7   4   14.17    1.10 
  -2   7  -4   12.37    0.84 
  -2   7  -4   10.92    1.01 
   2  -7   4   11.24    1.05 
  -3   7  -4   11.15    1.03 
  -3   7  -4   12.02    0.80 
   3  -7   4   11.37    1.07 
  -4   7  -4    8.50    0.89 
  -4   7  -4    7.06    0.57 
   4  -7   4    8.75    0.94 
  -5   7  -4   17.70    1.09 
  -5   7  -4   18.74    1.35 
   5  -7   4   20.30    1.49 
  -6   7  -4    5.11    0.45 
  -6   7  -4    5.69    0.76 
   6  -7   4    6.05    0.86 
  -7   7  -4   54.14    3.02 
  -7   7  -4   54.88    3.31 
   7  -7   4   52.47    3.31 
  -8   7  -4   48.51    2.98 
  -8   7  -4   46.29    2.68 
   8  -7   4   45.44    3.00 
  -9   7  -4    1.55    0.36 
  -9   7  -4    1.95    0.62 
   9  -7   4    1.68    0.75 
 -10   7  -4    0.73    0.54 
  10  -7   4    0.87    0.68 
 -11   7  -4    4.85    0.89 
  11  -7   4    3.63    0.90 
  11  -7   4    3.11    0.55 
 -12   7  -4    0.69    0.61 
  12  -7   4    1.63    0.80 
 -13   7  -4    0.88    0.68 
  13  -7   4    0.57    0.45 
  13  -7   4   -0.26    0.66 
 -14   7  -4   -0.59    0.58 
  14  -7   4    0.46    0.46 
  14  -7   4   -0.11    0.71 
 -15   7  -4    0.23    0.65 
  15  -7   4    0.21    0.77 
  15  -7   4    0.51    0.56 
 -16   7  -4    4.12    1.08 
  16  -7   4    2.19    0.97 
  16  -7   4    3.93    0.85 
  12   6  -4   -0.28    0.82 
 -12  -6   4   -0.72    0.81 
  11   6  -4   -0.39    0.65 
 -11  -6   4    0.20    0.78 
  10   6  -4    0.79    0.69 
 -10  -6   4    0.30    0.82 
   9   6  -4    0.12    0.74 
  -9  -6   4    0.24    0.76 
   8   6  -4    5.66    1.03 
  -8  -6   4    8.63    1.31 
   7   6  -4    2.56    0.73 
  -7  -6   4    2.16    0.83 
   6   6  -4   -0.64    0.43 
  -6  -6   4   -0.36    0.59 
   5   6  -4    2.77    0.63 
  -5  -6   4    5.29    0.94 
   4   6  -4    0.14    0.41 
  -4  -6   4    0.14    0.53 
  -4  -6   4    0.76    0.20 
   3   6  -4    0.25    0.43 
  -3  -6   4    0.59    0.52 
  -3  -6   4    0.11    0.23 
   2   6  -4    1.54    0.50 
   2   6  -4    0.74    0.39 
  -2  -6   4    1.21    0.30 
   1   6  -4    2.26    0.48 
   1   6  -4    1.64    0.51 
  -1  -6   4    2.81    0.42 
   0   6  -4   -0.59    0.38 
   0   6  -4    0.40    0.32 
   0  -6   4    0.17    0.33 
  -1   6  -4   -0.12    0.27 
  -1   6  -4   -0.39    0.32 
   1  -6   4    0.82    0.39 
  -2   6  -4   -0.41    0.22 
  -2   6  -4   -0.26    0.32 
   2  -6   4    0.08    0.40 
  -3   6  -4    6.81    0.76 
  -3   6  -4    6.24    0.53 
   3  -6   4    6.49    0.76 
  -4   6  -4    6.39    0.75 
  -4   6  -4    6.76    0.53 
   4  -6   4    6.62    0.77 
  -5   6  -4    9.92    0.69 
  -5   6  -4   10.98    0.91 
   5  -6   4    9.13    0.96 
  -6   6  -4    6.23    0.54 
  -6   6  -4    6.75    0.78 
   6  -6   4    4.86    0.78 
  -7   6  -4    0.53    0.46 
  -7   6  -4    1.11    0.30 
   7  -6   4    1.49    0.56 
  -8   6  -4   12.18    0.93 
  -8   6  -4   13.31    1.29 
   8  -6   4   12.11    1.26 
  -9   6  -4    7.45    0.94 
   9  -6   4    8.41    1.07 
   9  -6   4    6.43    0.70 
 -10   6  -4   -0.06    0.49 
  10  -6   4    0.25    0.65 
  10  -6   4    0.21    0.36 
 -11   6  -4   -0.12    0.52 
  11  -6   4   -0.09    0.66 
  11  -6   4    0.16    0.39 
 -12   6  -4    0.16    0.52 
  12  -6   4    0.20    0.42 
  12  -6   4    1.05    0.73 
 -13   6  -4    1.34    0.63 
  13  -6   4   -0.25    0.45 
  13  -6   4    0.72    0.74 
 -14   6  -4    0.98    0.70 
  14  -6   4    1.49    0.58 
  14  -6   4    1.82    0.86 
 -15   6  -4    0.54    0.70 
  15  -6   4    0.90    0.60 
  15  -6   4   -0.60    0.71 
 -16   6  -4    0.10    0.64 
  16  -6   4   -1.10    0.75 
  16  -6   4    0.03    0.62 
  12   5  -4    0.13    0.70 
 -12  -5   4    0.54    0.95 
  11   5  -4    3.85    0.95 
 -11  -5   4    2.62    0.96 
  10   5  -4    1.46    0.82 
 -10  -5   4    0.90    0.83 
   9   5  -4    4.25    0.91 
  -9  -5   4    5.85    1.10 
   8   5  -4   -0.23    0.55 
  -8  -5   4    0.32    0.64 
   7   5  -4    3.19    0.72 
  -7  -5   4    3.20    0.91 
   6   5  -4    8.15    0.98 
  -6  -5   4   10.37    1.26 
   5   5  -4    2.98    0.63 
  -5  -5   4    2.10    0.69 
   4   5  -4    5.94    0.76 
  -4  -5   4    8.05    0.98 
   3   5  -4    8.68    0.91 
  -3  -5   4   10.98    1.13 
  -3  -5   4    9.50    0.62 
   2   5  -4    0.34    0.36 
  -2  -5   4    0.98    0.26 
  -2  -5   4    2.15    0.58 
   1   5  -4    5.96    0.63 
   1   5  -4    6.04    0.74 
  -1  -5   4    7.04    0.60 
   0   5  -4    1.49    0.46 
   0   5  -4    0.49    0.32 
   0  -5   4    1.15    0.35 
  -1   5  -4    8.21    0.79 
  -1   5  -4    9.70    0.69 
   1  -5   4    8.63    0.78 
  -2   5  -4   37.35    2.12 
  -2   5  -4   36.73    2.23 
   2  -5   4   36.84    2.24 
  -3   5  -4   13.26    1.03 
  -3   5  -4   14.23    0.89 
   3  -5   4   13.73    1.12 
  -4   5  -4    1.93    0.30 
  -4   5  -4    2.24    0.43 
   4  -5   4    3.68    0.62 
  -5   5  -4   12.79    0.87 
  -5   5  -4   12.62    1.03 
   5  -5   4   13.06    1.13 
  -6   5  -4   15.23    1.04 
  -6   5  -4   15.10    1.19 
   6  -5   4   15.10    1.34 
  -7   5  -4    0.96    0.46 
   7  -5   4    1.17    0.33 
   7  -5   4    0.91    0.57 
  -8   5  -4    2.44    0.57 
   8  -5   4    2.42    0.45 
   8  -5   4    3.31    0.74 
  -9   5  -4    2.53    0.66 
   9  -5   4    3.42    0.76 
   9  -5   4    3.84    0.57 
 -10   5  -4    0.89    0.54 
  10  -5   4    0.36    0.39 
  10  -5   4   -0.50    0.57 
 -11   5  -4    1.05    0.64 
  11  -5   4    1.17    0.70 
  11  -5   4    1.94    0.55 
 -12   5  -4    0.77    0.65 
  12  -5   4    1.76    0.77 
  12  -5   4    1.70    0.59 
 -13   5  -4    1.72    0.71 
  13  -5   4    0.58    0.54 
  13  -5   4    1.32    0.72 
 -14   5  -4    0.34    0.67 
  14  -5   4    0.18    0.57 
  14  -5   4    0.53    0.71 
 -15   5  -4   -0.29    0.66 
  15  -5   4   -0.01    0.76 
  15  -5   4    0.85    0.64 
  13   4  -4    0.26    0.69 
 -13  -4   4    0.44    0.94 
  12   4  -4   -0.23    0.74 
 -12  -4   4   -0.27    0.79 
  11   4  -4   10.28    1.40 
 -11  -4   4   12.77    1.63 
  10   4  -4    0.59    0.71 
 -10  -4   4    0.54    0.78 
   9   4  -4    1.67    0.67 
  -9  -4   4    1.76    0.87 
   8   4  -4    0.33    0.53 
  -8  -4   4   -0.51    0.59 
   7   4  -4    4.54    0.81 
  -7  -4   4    4.81    0.96 
   6   4  -4   -0.46    0.45 
  -6  -4   4   -0.19    0.52 
   5   4  -4    0.94    0.45 
  -5  -4   4    0.19    0.47 
   4   4  -4    5.50    0.68 
  -4  -4   4    4.89    0.77 
   3   4  -4   30.65    1.92 
  -3  -4   4   29.51    1.98 
   2   4  -4    8.65    0.77 
  -2  -4   4    6.59    0.54 
  -2  -4   4    8.86    0.87 
   1   4  -4    3.27    0.46 
   1   4  -4    4.26    0.57 
  -1  -4   4    4.30    0.43 
   0   4  -4   13.53    0.99 
   0   4  -4   14.18    0.96 
   0  -4   4   13.84    0.96 
  -1   4  -4    7.44    0.60 
  -1   4  -4    7.86    0.68 
   1  -4   4    7.43    0.71 
  -2   4  -4   14.00    0.98 
  -2   4  -4   14.76    0.92 
   2  -4   4   13.15    1.03 
  -3   4  -4    0.46    0.23 
  -3   4  -4    0.88    0.30 
   3  -4   4    0.72    0.39 
  -4   4  -4    4.23    0.54 
  -4   4  -4    2.87    0.39 
   4  -4   4    3.51    0.60 
  -5   4  -4    6.48    0.60 
  -5   4  -4    6.45    0.71 
   5  -4   4    5.57    0.73 
  -6   4  -4   11.16    1.05 
   6  -4   4   13.22    1.15 
   6  -4   4   14.62    1.00 
  -7   4  -4   -0.11    0.39 
   7  -4   4    0.00    0.29 
   7  -4   4    0.05    0.48 
  -8   4  -4    2.78    0.60 
   8  -4   4    2.05    0.61 
   8  -4   4    1.92    0.48 
  -9   4  -4    0.91    0.53 
   9  -4   4    0.92    0.43 
   9  -4   4    1.95    0.67 
 -10   4  -4    3.94    0.78 
  10  -4   4    3.29    0.79 
  10  -4   4    3.75    0.69 
 -11   4  -4    1.54    0.66 
  11  -4   4    1.45    0.69 
  11  -4   4    2.38    0.61 
 -12   4  -4    0.11    0.55 
  12  -4   4    0.67    0.56 
  12  -4   4    0.16    0.63 
 -13   4  -4    2.76    0.82 
  13  -4   4    0.93    0.74 
  13  -4   4    1.47    0.65 
 -14   4  -4    2.07    0.86 
  14  -4   4    1.04    0.76 
  14  -4   4    1.23    0.71 
 -15   4  -4    0.52    0.70 
  15  -4   4   -0.52    0.68 
  15  -4   4    2.01    0.83 
  14   3  -4   -0.32    0.66 
 -14  -3   4    1.02    0.97 
  13   3  -4   -0.89    0.63 
 -13  -3   4   -0.34    0.66 
  12   3  -4    1.83    0.73 
 -12  -3   4    0.94    0.86 
  11   3  -4   -0.70    0.53 
 -11  -3   4    0.43    0.72 
  10   3  -4   -0.08    0.55 
 -10  -3   4    0.85    0.77 
   9   3  -4    8.28    1.08 
  -9  -3   4   11.99    1.48 
   8   3  -4   -0.18    0.52 
  -8  -3   4   -0.01    0.56 
   7   3  -4    7.35    0.94 
  -7  -3   4    7.10    1.07 
   6   3  -4    4.00    0.65 
  -6  -3   4    4.37    0.78 
   5   3  -4    3.37    0.57 
  -5  -3   4    3.20    0.64 
   4   3  -4   18.90    1.38 
  -4  -3   4   20.56    1.46 
   3   3  -4   -0.37    0.34 
  -3  -3   4    0.32    0.38 
   2   3  -4    1.74    0.43 
  -2  -3   4    2.07    0.26 
  -2  -3   4    2.15    0.49 
   1   3  -4   15.88    1.05 
   1   3  -4   14.65    1.04 
  -1  -3   4   15.15    0.96 
   0   3  -4    1.02    0.31 
   0   3  -4    1.82    0.37 
   0  -3   4    1.72    0.36 
  -1   3  -4    1.85    0.33 
  -1   3  -4    1.50    0.32 
   1  -3   4    0.17    0.40 
  -2   3  -4    0.34    0.23 
  -2   3  -4    0.32    0.24 
   2  -3   4    0.29    0.38 
  -3   3  -4    3.50    0.43 
  -3   3  -4    2.49    0.36 
   3  -3   4    3.59    0.54 
  -4   3  -4    3.93    0.48 
  -4   3  -4    5.75    0.58 
   4  -3   4    5.79    0.71 
  -5   3  -4    0.99    0.38 
   5  -3   4    0.44    0.44 
   5  -3   4    0.65    0.32 
  -6   3  -4   18.11    1.32 
   6  -3   4   17.36    1.30 
   6  -3   4   21.65    1.47 
  -7   3  -4    1.69    0.48 
   7  -3   4    0.92    0.50 
   7  -3   4    0.99    0.42 
  -8   3  -4    8.18    0.91 
   8  -3   4    7.87    0.86 
   8  -3   4    7.33    0.92 
  -9   3  -4    2.07    0.63 
   9  -3   4    2.23    0.58 
   9  -3   4    2.10    0.66 
 -10   3  -4   13.06    1.33 
  10  -3   4    9.58    1.11 
  10  -3   4   13.27    1.34 
 -11   3  -4    1.50    0.63 
  11  -3   4    0.94    0.55 
  11  -3   4    1.95    0.70 
 -12   3  -4    0.09    0.60 
  12  -3   4   -0.57    0.53 
  12  -3   4    0.80    0.61 
 -13   3  -4   -0.03    0.61 
  13  -3   4    0.18    0.61 
  13  -3   4    1.31    0.69 
 -14   3  -4    2.12    0.83 
  14  -3   4    2.15    0.78 
  14  -3   4    3.39    0.92 
 -15   3  -4   -0.90    0.57 
  15  -3   4    1.15    0.82 
  14   2  -4   -0.97    0.60 
 -14  -2   4   -1.14    0.73 
  13   2  -4   -0.67    0.61 
 -13  -2   4   -0.21    0.73 
  12   2  -4    2.19    0.85 
 -12  -2   4    2.28    0.89 
  11   2  -4    0.64    0.65 
 -11  -2   4    1.69    0.77 
  10   2  -4    3.79    0.76 
 -10  -2   4    3.30    0.92 
   9   2  -4    2.45    0.66 
  -9  -2   4    1.19    0.75 
   8   2  -4    2.90    0.64 
  -8  -2   4    3.63    0.85 
   7   2  -4   -0.82    0.34 
  -7  -2   4    0.42    0.50 
   6   2  -4    5.29    0.76 
  -6  -2   4    7.23    0.97 
   5   2  -4    0.40    0.42 
  -5  -2   4   -0.10    0.40 
   4   2  -4    9.20    0.84 
  -4  -2   4    7.63    0.85 
   3   2  -4    0.24    0.35 
  -3  -2   4    0.09    0.36 
  -3  -2   4    0.10    0.14 
   2   2  -4    8.94    0.74 
  -2  -2   4    9.76    0.63 
  -2  -2   4    8.76    0.76 
   1   2  -4   29.13    1.63 
  -1  -2   4   25.57    1.57 
  -1  -2   4   24.74    1.61 
   0   2  -4   29.70    1.75 
   0   2  -4   28.91    1.70 
   0  -2   4   29.14    1.82 
  -1   2  -4   24.93    1.63 
   1  -2   4   26.25    1.62 
  -2   2  -4    9.72    0.74 
  -2   2  -4    8.87    0.65 
   2  -2   4    9.78    0.80 
  -3   2  -4    1.71    0.32 
  -3   2  -4    2.21    0.33 
   3  -2   4    1.80    0.42 
  -4   2  -4    2.22    0.39 
   4  -2   4    1.70    0.40 
   4  -2   4    1.49    0.49 
  -5   2  -4    1.44    0.38 
   5  -2   4    1.32    0.47 
   5  -2   4    1.28    0.39 
  -6   2  -4    6.70    0.76 
   6  -2   4    6.98    0.74 
   6  -2   4    7.69    0.87 
  -7   2  -4    0.60    0.40 
   7  -2   4    0.67    0.48 
   7  -2   4    0.36    0.42 
  -8   2  -4    7.60    0.91 
   8  -2   4    8.11    0.99 
   8  -2   4    7.04    0.89 
  -9   2  -4    2.16    0.59 
   9  -2   4    0.79    0.56 
   9  -2   4    2.31    0.64 
 -10   2  -4    1.79    0.63 
  10  -2   4   -0.56    0.49 
  10  -2   4   -0.15    0.54 
 -11   2  -4    1.07    0.60 
  11  -2   4   -0.06    0.51 
  11  -2   4   -0.21    0.50 
 -12   2  -4    1.89    0.70 
  12  -2   4    2.02    0.71 
  12  -2   4    2.89    0.77 
 -13   2  -4   -0.53    0.57 
  13  -2   4    0.25    0.62 
  13  -2   4    0.63    0.75 
 -14   2  -4    3.24    0.97 
  14  -2   4    2.16    0.79 
  14  -2   4    2.37    0.96 
  15   1  -4    5.18    1.12 
 -15  -1   4    2.43    1.12 
  14   1  -4   -0.77    0.54 
 -14  -1   4   -0.72    0.73 
  13   1  -4    0.58    0.63 
 -13  -1   4   -0.43    0.66 
  12   1  -4    0.75    0.70 
 -12  -1   4    2.31    0.94 
  11   1  -4    3.66    0.77 
 -11  -1   4    1.93    0.87 
  10   1  -4    0.19    0.26 
  10   1  -4   -0.34    0.52 
 -10  -1   4    0.57    0.64 
   9   1  -4    0.84    0.25 
   9   1  -4   -0.81    0.45 
  -9  -1   4    2.24    0.73 
   8   1  -4    0.13    0.46 
   8   1  -4   -0.52    0.17 
  -8  -1   4   -1.07    0.49 
   7   1  -4    4.64    0.42 
   7   1  -4    4.97    0.71 
  -7  -1   4    5.53    0.87 
   6   1  -4    2.15    0.27 
   6   1  -4    1.89    0.50 
  -6  -1   4    2.21    0.59 
   5   1  -4    1.61    0.44 
  -5  -1   4    1.25    0.50 
   4   1  -4   29.52    1.89 
  -4  -1   4   29.97    1.97 
  -4  -1   4   31.86    1.73 
   3   1  -4    0.32    0.30 
  -3  -1   4    0.58    0.21 
  -3  -1   4    0.71    0.37 
   2   1  -4    4.05    0.46 
  -2  -1   4    3.04    0.39 
  -2  -1   4    3.03    0.51 
  -1  -1   4    3.00    0.45 
  -1  -1   4    3.84    0.48 
   0   1  -4    0.73    0.37 
   0  -1   4    2.06    0.26 
   0  -1   4    2.12    0.40 
  -1   1  -4    1.34    0.18 
  -1   1  -4    0.22    0.31 
   1  -1   4    1.30    0.18 
   1  -1   4    1.08    0.35 
  -2   1  -4    6.90    0.56 
  -2   1  -4    4.02    0.40 
   2  -1   4    6.37    0.65 
  -3   1  -4   -0.17    0.21 
  -3   1  -4   -0.59    0.23 
   3  -1   4    0.04    0.35 
  -4   1  -4   -0.01    0.25 
   4  -1   4    0.26    0.36 
   4  -1   4    0.47    0.32 
  -5   1  -4    4.07    0.54 
   5  -1   4    3.66    0.63 
   5  -1   4    4.43    0.63 
  -6   1  -4    2.87    0.52 
   6  -1   4    3.25    0.60 
   6  -1   4    3.32    0.61 
  -7   1  -4    2.59    0.55 
   7  -1   4    2.37    0.59 
   7  -1   4    2.15    0.56 
  -8   1  -4    0.50    0.45 
   8  -1   4    0.54    0.46 
   8  -1   4   -0.41    0.39 
  -9   1  -4    3.49    0.71 
   9  -1   4    4.11    0.82 
   9  -1   4    2.04    0.64 
 -10   1  -4    0.52    0.53 
  10  -1   4    0.26    0.50 
  10  -1   4    0.24    0.51 
 -11   1  -4   -0.49    0.50 
  11  -1   4    0.05    0.52 
  11  -1   4    0.96    0.68 
 -12   1  -4    5.59    1.01 
  12  -1   4    5.55    0.91 
  12  -1   4    6.05    1.10 
 -13   1  -4    1.86    0.76 
  13  -1   4    0.99    0.82 
  13  -1   4    1.66    0.72 
 -14   1  -4    0.12    0.66 
  14  -1   4   -0.01    0.82 
  15   0  -4    3.39    0.91 
 -15   0   4    3.49    1.15 
  14   0  -4    0.37    0.61 
 -14   0   4   -0.42    0.78 
  13   0  -4   -0.02    0.61 
 -13   0   4   -0.26    0.63 
  12   0  -4    1.56    0.66 
 -12   0   4    0.25    0.63 
  11   0  -4    0.39    0.59 
  11   0  -4    0.66    0.34 
 -11   0   4    1.26    0.69 
  10   0  -4    4.43    0.51 
  10   0  -4    4.12    0.71 
 -10   0   4    3.45    0.85 
   9   0  -4    0.08    0.40 
   9   0  -4    0.52    0.29 
  -9   0   4    0.91    0.58 
   8   0  -4    4.41    0.70 
   8   0  -4    5.49    0.54 
  -8   0   4    5.37    0.89 
   7   0  -4    8.11    0.67 
   7   0  -4    7.80    0.84 
  -7   0   4   10.59    1.08 
   6   0  -4    4.46    0.60 
   6   0  -4    4.45    0.45 
  -6   0   4    3.46    0.67 
   5   0  -4   20.43    1.34 
  -5   0   4   19.23    1.41 
   4   0  -4    6.20    0.66 
  -4   0   4   10.89    0.80 
  -4   0   4    7.98    0.62 
   3   0  -4   98.18    5.40 
  -3   0   4   96.46    5.34 
  -3   0   4   98.12    5.41 
   2   0  -4   20.04    1.41 
  -2   0   4   24.02    1.35 
  -2   0   4   20.68    1.34 
   1   0  -4   17.22    1.21 
  -1   0   4   19.86    1.24 
  -1   0   4   19.54    1.12 
   0   0  -4    7.56    0.73 
   0   0   4    9.25    0.72 
  -1   0  -4    0.97    0.30 
   1   0   4    0.93    0.32 
  -2   0  -4    0.80    0.31 
  -2   0  -4    0.53    0.19 
   2   0   4    0.27    0.32 
  -3   0  -4   12.35    0.86 
   3   0   4   13.20    1.04 
   3   0   4   13.53    1.04 
  -4   0  -4    1.52    0.35 
   4   0   4    1.03    0.41 
   4   0   4    0.78    0.40 
  -5   0  -4    4.65    0.59 
   5   0   4    5.25    0.72 
   5   0   4    4.79    0.69 
  -6   0  -4    0.19    0.34 
   6   0   4    0.37    0.40 
   6   0   4   -0.08    0.42 
  -7   0  -4   11.51    1.05 
   7   0   4   13.27    1.20 
   7   0   4   11.63    1.09 
  -8   0  -4   -0.31    0.40 
   8   0   4    0.40    0.53 
   8   0   4    0.20    0.48 
  -9   0  -4    3.22    0.73 
   9   0   4    3.38    0.77 
   9   0   4    3.56    0.69 
 -10   0  -4    2.09    0.69 
  10   0   4    2.02    0.76 
  10   0   4    1.83    0.62 
 -11   0  -4   -0.32    0.53 
  11   0   4   -0.26    0.50 
  11   0   4   -0.20    0.63 
 -12   0  -4   -0.51    0.55 
  12   0   4    0.35    0.58 
  12   0   4   -0.25    0.62 
 -13   0  -4    1.53    0.75 
  13   0   4    0.96    0.82 
  16  -1  -4    0.22    0.74 
 -16   1   4   -0.29    0.82 
  15  -1  -4    0.75    0.76 
 -15   1   4    2.40    1.04 
  14  -1  -4   -1.03    0.56 
 -14   1   4   -1.21    0.61 
  13  -1  -4    0.56    0.64 
 -13   1   4    0.25    0.67 
  12  -1  -4   -0.32    0.38 
  12  -1  -4   -0.40    0.52 
 -12   1   4    0.46    0.72 
  11  -1  -4   -0.21    0.36 
  11  -1  -4   -0.11    0.49 
 -11   1   4    0.13    0.58 
  10  -1  -4   12.81    1.24 
  10  -1  -4   13.33    1.02 
 -10   1   4   11.82    1.37 
   9  -1  -4    4.03    0.52 
   9  -1  -4    2.91    0.62 
  -9   1   4    3.62    0.75 
   8  -1  -4    3.73    0.50 
   8  -1  -4    3.09    0.62 
  -8   1   4    4.95    0.83 
   7  -1  -4    1.20    0.35 
   7  -1  -4    0.75    0.37 
  -7   1   4    1.03    0.58 
   6  -1  -4    3.48    0.52 
   6  -1  -4    5.16    0.51 
  -6   1   4    5.59    0.73 
   5  -1  -4    2.11    0.40 
  -5   1   4    3.22    0.57 
  -5   1   4    2.90    0.39 
   4  -1  -4   29.95    1.83 
  -4   1   4   29.86    1.79 
  -4   1   4   30.28    1.86 
   3  -1  -4   10.07    0.82 
  -3   1   4   11.32    0.83 
  -3   1   4   11.19    0.83 
   2  -1  -4   -0.12    0.26 
  -2   1   4    0.03    0.29 
  -2   1   4    0.07    0.22 
   1  -1  -4    6.68    0.62 
  -1   1   4    6.89    0.48 
  -1   1   4    6.61    0.66 
   0  -1  -4   17.28    0.95 
   0  -1  -4   16.55    1.13 
   0   1   4   16.76    0.95 
   0   1   4   16.97    1.19 
  -1  -1  -4    2.17    0.40 
  -1  -1  -4    2.76    0.25 
   1   1   4    1.40    0.40 
  -2  -1  -4    5.42    0.47 
   2   1   4    4.54    0.57 
   2   1   4    5.02    0.62 
  -3  -1  -4   16.63    1.10 
   3   1   4   16.64    1.25 
   3   1   4   17.40    1.25 
  -4  -1  -4   13.31    0.99 
   4   1   4   12.83    1.11 
   4   1   4   13.28    1.10 
  -5  -1  -4   -0.01    0.31 
   5   1   4    0.27    0.41 
   5   1   4    0.07    0.38 
  -6  -1  -4    0.29    0.36 
   6   1   4    0.90    0.54 
   6   1   4    0.47    0.42 
  -7  -1  -4    1.17    0.49 
   7   1   4    2.66    0.73 
   7   1   4    2.39    0.59 
  -8  -1  -4    2.39    0.60 
   8   1   4    1.20    0.52 
   8   1   4    2.30    0.69 
  -9  -1  -4    0.60    0.55 
   9   1   4   -0.54    0.45 
   9   1   4   -0.77    0.57 
 -10  -1  -4    0.39    0.56 
  10   1   4    1.45    0.70 
  10   1   4    1.13    0.58 
 -11  -1  -4    0.43    0.59 
  11   1   4    0.25    0.74 
  11   1   4   -0.01    0.51 
 -12  -1  -4    2.08    0.79 
  12   1   4    2.56    0.91 
 -13  -1  -4   -0.40    0.57 
  13   1   4    0.09    0.84 
  16  -2  -4    0.36    0.75 
 -16   2   4    0.97    0.98 
  15  -2  -4    2.00    0.77 
 -15   2   4    1.73    0.85 
  14  -2  -4    0.94    0.65 
 -14   2   4    1.98    0.92 
  13  -2  -4    0.00    0.50 
 -13   2   4    0.42    0.74 
  12  -2  -4    1.81    0.53 
  12  -2  -4    1.76    0.62 
 -12   2   4    1.06    0.76 
  11  -2  -4   -0.12    0.41 
  11  -2  -4    0.16    0.47 
 -11   2   4    1.15    0.63 
  10  -2  -4    4.56    0.71 
  10  -2  -4    4.54    0.65 
 -10   2   4    4.18    0.87 
   9  -2  -4    0.86    0.39 
   9  -2  -4    0.67    0.40 
  -9   2   4    0.92    0.54 
   8  -2  -4    1.15    0.46 
   8  -2  -4    1.41    0.41 
  -8   2   4    0.93    0.52 
   7  -2  -4    4.94    0.60 
   7  -2  -4    5.69    0.63 
  -7   2   4    6.69    0.90 
   6  -2  -4   -0.17    0.30 
  -6   2   4    0.17    0.44 
   5  -2  -4    3.13    0.45 
  -5   2   4    3.04    0.57 
  -5   2   4    3.98    0.51 
   4  -2  -4   -0.29    0.26 
  -4   2   4    0.94    0.35 
  -4   2   4   -0.29    0.32 
   3  -2  -4    5.04    0.53 
  -3   2   4    6.09    0.62 
  -3   2   4    4.71    0.54 
   2  -2  -4   27.24    1.69 
  -2   2   4   27.61    1.64 
  -2   2   4   28.85    1.76 
   1  -2  -4    0.36    0.27 
  -1   2   4    0.48    0.33 
  -1   2   4    1.19    0.22 
   0  -2  -4   20.41    1.33 
   0   2   4   19.05    1.35 
   0   2   4   20.48    1.18 
  -1  -2  -4    5.32    0.49 
  -1  -2  -4    5.83    0.66 
   1   2   4    5.57    0.68 
  -2  -2  -4   16.90    1.07 
   2   2   4   15.66    1.24 
   2   2   4   16.92    1.24 
  -3  -2  -4    3.55    0.47 
   3   2   4    2.77    0.55 
   3   2   4    3.50    0.59 
  -4  -2  -4    3.47    0.53 
   4   2   4    4.12    0.60 
   4   2   4    2.68    0.59 
  -5  -2  -4    0.69    0.40 
   5   2   4    0.45    0.42 
   5   2   4    0.13    0.44 
  -6  -2  -4    4.15    0.67 
   6   2   4    2.38    0.60 
   6   2   4    3.81    0.79 
  -7  -2  -4    0.72    0.50 
   7   2   4    0.55    0.62 
   7   2   4    0.54    0.47 
  -8  -2  -4    8.53    1.06 
   8   2   4    9.64    1.05 
   8   2   4    6.77    1.14 
  -9  -2  -4    0.75    0.55 
   9   2   4   -0.29    0.48 
   9   2   4    0.27    0.63 
 -10  -2  -4    0.59    0.60 
  10   2   4    2.65    0.70 
  10   2   4    0.63    0.70 
 -11  -2  -4    1.01    0.69 
  11   2   4    2.44    0.98 
  11   2   4    2.03    0.68 
 -12  -2  -4    1.75    0.77 
  12   2   4   -0.70    0.69 
  16  -3  -4    0.26    0.63 
 -16   3   4   -0.01    0.82 
  15  -3  -4    0.30    0.61 
 -15   3   4   -0.32    0.71 
  14  -3  -4   -0.02    0.52 
 -14   3   4    0.96    0.71 
  13  -3  -4   -0.02    0.46 
  13  -3  -4    0.23    0.52 
 -13   3   4    0.10    0.70 
  12  -3  -4    1.33    0.54 
  12  -3  -4    0.18    0.43 
 -12   3   4    1.91    0.76 
  11  -3  -4    1.62    0.54 
  11  -3  -4    2.82    0.62 
 -11   3   4    1.26    0.74 
  10  -3  -4    3.04    0.58 
  10  -3  -4    1.73    0.50 
 -10   3   4    3.00    0.80 
   9  -3  -4    2.25    0.48 
   9  -3  -4    2.61    0.53 
  -9   3   4    1.45    0.57 
   8  -3  -4    0.50    0.38 
   8  -3  -4    0.69    0.35 
  -8   3   4    0.29    0.47 
   7  -3  -4    1.84    0.46 
   7  -3  -4    1.86    0.42 
  -7   3   4    1.88    0.53 
   6  -3  -4    1.69    0.36 
  -6   3   4    1.57    0.42 
  -6   3   4    0.92    0.51 
   5  -3  -4    0.87    0.31 
  -5   3   4    0.84    0.43 
  -5   3   4    1.15    0.42 
   4  -3  -4    0.69    0.30 
  -4   3   4    1.22    0.41 
  -4   3   4    1.16    0.39 
   3  -3  -4   17.29    1.11 
  -3   3   4   16.24    1.12 
  -3   3   4   15.68    1.17 
   2  -3  -4   13.34    0.98 
  -2   3   4   13.17    0.91 
  -2   3   4   12.71    1.04 
   1  -3  -4    9.48    0.83 
  -1   3   4   10.36    0.90 
  -1   3   4   10.94    0.73 
   0  -3  -4    3.90    0.54 
   0   3   4    4.63    0.45 
   0   3   4    3.46    0.60 
  -1  -3  -4   -0.52    0.24 
   1   3   4    0.02    0.33 
   1   3   4    0.42    0.40 
  -2  -3  -4   22.22    1.44 
   2   3   4   23.25    1.59 
   2   3   4   23.56    1.63 
  -3  -3  -4    0.25    0.31 
   3   3   4    0.08    0.45 
   3   3   4    0.26    0.38 
  -4  -3  -4    0.14    0.33 
   4   3   4    0.73    0.44 
   4   3   4    0.01    0.41 
  -5  -3  -4    6.91    0.83 
   5   3   4    6.00    0.87 
   5   3   4    6.90    0.86 
  -6  -3  -4    1.54    0.56 
   6   3   4   -0.08    0.52 
   6   3   4    3.59    0.68 
  -7  -3  -4    3.84    0.79 
   7   3   4    5.35    0.82 
   7   3   4    5.85    1.00 
  -8  -3  -4    2.99    0.76 
   8   3   4    2.49    0.69 
  -9  -3  -4   12.66    1.45 
   9   3   4   12.61    1.55 
   9   3   4   15.98    1.37 
 -10  -3  -4    0.51    0.57 
  10   3   4    1.21    0.84 
  10   3   4   -1.11    0.50 
 -11  -3  -4    2.18    0.79 
  11   3   4    5.45    1.21 
  17  -4  -4    0.45    0.64 
  16  -4  -4    0.49    0.61 
 -16   4   4   -0.83    0.78 
  15  -4  -4    0.79    0.59 
 -15   4   4    1.71    0.85 
  14  -4  -4    6.28    0.94 
 -14   4   4    8.56    1.40 
  13  -4  -4    0.99    0.58 
  13  -4  -4    0.20    0.45 
 -13   4   4   -0.47    0.58 
  12  -4  -4    1.33    0.57 
  12  -4  -4    1.93    0.53 
 -12   4   4    0.12    0.69 
  11  -4  -4    0.60    0.40 
  11  -4  -4    0.26    0.49 
 -11   4   4   -0.08    0.64 
  10  -4  -4    4.56    0.65 
  10  -4  -4    6.37    0.79 
 -10   4   4    3.47    0.85 
   9  -4  -4    5.05    0.71 
   9  -4  -4    4.97    0.61 
  -9   4   4    4.93    0.85 
   8  -4  -4    0.69    0.42 
   8  -4  -4    0.92    0.34 
  -8   4   4    0.28    0.47 
   7  -4  -4   -0.12    0.37 
   7  -4  -4   -0.08    0.28 
  -7   4   4   -0.55    0.44 
   6  -4  -4   -0.05    0.26 
  -6   4   4   -0.25    0.36 
  -6   4   4   -0.01    0.43 
   5  -4  -4    0.42    0.29 
  -5   4   4    0.36    0.43 
  -5   4   4    0.13    0.41 
   4  -4  -4    9.73    0.78 
  -4   4   4   10.15    0.98 
  -4   4   4   10.72    0.88 
   3  -4  -4    2.86    0.47 
  -3   4   4    3.04    0.56 
  -3   4   4    2.66    0.46 
   2  -4  -4   11.11    0.83 
  -2   4   4    9.90    0.94 
  -2   4   4   10.10    0.81 
   1  -4  -4   -0.47    0.27 
  -1   4   4    0.04    0.27 
   0  -4  -4    2.02    0.48 
   0   4   4    1.97    0.53 
   0   4   4    2.09    0.37 
   1   4   4    5.23    0.67 
   1   4   4    5.13    0.73 
   1   4   4    5.42    0.58 
  -2  -4  -4    0.90    0.35 
   2   4   4    1.76    0.51 
   2   4   4    0.78    0.43 
  -3  -4  -4    1.59    0.43 
   3   4   4    0.81    0.48 
   3   4   4    0.97    0.46 
  -4  -4  -4    1.26    0.46 
   4   4   4    0.58    0.51 
   4   4   4    0.73    0.46 
  -5  -4  -4    0.30    0.43 
   5   4   4    0.17    0.58 
   5   4   4   -0.31    0.41 
  -6  -4  -4    0.83    0.53 
   6   4   4    1.11    0.70 
   6   4   4    1.37    0.56 
  -7  -4  -4    0.54    0.54 
   7   4   4    0.40    0.52 
   7   4   4    1.34    0.73 
  -8  -4  -4    0.03    0.54 
   8   4   4   -0.68    0.57 
   8   4   4    1.35    0.60 
  -9  -4  -4   -0.18    0.56 
   9   4   4    0.45    0.56 
   9   4   4   -0.49    0.71 
 -10  -4  -4    0.40    0.64 
  10   4   4    0.87    0.89 
 -11  -4  -4    3.29    0.95 
  11   4   4    2.72    1.00 
  17  -5  -4    1.53    0.68 
 -17   5   4    0.65    0.91 
  16  -5  -4    3.26    0.77 
 -16   5   4    3.21    1.11 
  15  -5  -4    0.27    0.60 
  15  -5  -4    0.77    0.54 
 -15   5   4    0.13    0.87 
  14  -5  -4    1.44    0.54 
  14  -5  -4   -0.21    0.61 
 -14   5   4    0.10    0.67 
  13  -5  -4   13.36    1.18 
  13  -5  -4   13.37    1.36 
 -13   5   4   13.46    1.64 
  12  -5  -4   13.32    1.31 
  12  -5  -4   13.24    1.11 
 -12   5   4   11.26    1.43 
  11  -5  -4    1.18    0.43 
  11  -5  -4    1.97    0.59 
 -11   5   4    0.26    0.59 
  10  -5  -4    3.57    0.54 
  10  -5  -4    3.98    0.70 
 -10   5   4    4.23    0.84 
   9  -5  -4    0.35    0.46 
   9  -5  -4    0.64    0.33 
  -9   5   4    0.39    0.49 
   8  -5  -4    0.03    0.42 
   8  -5  -4    0.04    0.27 
  -8   5   4    0.81    0.55 
   7  -5  -4    2.50    0.40 
  -7   5   4    2.69    0.65 
  -7   5   4    3.84    0.63 
   6  -5  -4    0.25    0.27 
  -6   5   4    0.94    0.49 
  -6   5   4    0.15    0.41 
   5  -5  -4    0.30    0.30 
  -5   5   4    0.48    0.41 
  -5   5   4    0.74    0.49 
   4  -5  -4    0.84    0.34 
  -4   5   4    2.33    0.48 
  -4   5   4    1.68    0.55 
   3  -5  -4   -0.63    0.26 
  -3   5   4    0.45    0.46 
  -3   5   4    0.45    0.33 
   2  -5  -4    0.78    0.33 
  -2   5   4    0.40    0.32 
  -2   5   4    0.50    0.44 
   1  -5  -4    1.10    0.37 
  -1   5   4    0.76    0.34 
  -1   5   4    1.59    0.51 
   0   5   4    8.46    0.87 
   0   5   4    8.48    0.93 
   0   5   4    8.08    0.74 
   1   5   4    0.04    0.43 
   1   5   4   -0.05    0.37 
   1   5   4    0.40    0.34 
  -2  -5  -4    8.62    0.82 
   2   5   4    9.07    1.00 
   2   5   4    7.62    0.93 
  -3  -5  -4    0.36    0.36 
   3   5   4    0.56    0.47 
   3   5   4   -0.30    0.44 
  -4  -5  -4   17.03    1.35 
   4   5   4   19.05    1.56 
   4   5   4   16.68    1.45 
  -5  -5  -4    1.72    0.59 
   5   5   4    1.02    0.71 
   5   5   4    0.66    0.55 
  -6  -5  -4    0.34    0.55 
   6   5   4    0.21    0.52 
   6   5   4    0.11    0.59 
  -7  -5  -4    0.60    0.56 
   7   5   4    0.33    0.65 
   7   5   4    0.32    0.50 
  -8  -5  -4    1.25    0.63 
   8   5   4    0.30    0.77 
   8   5   4    1.51    0.65 
  -9  -5  -4    0.55    0.63 
   9   5   4   -0.97    0.72 
 -10  -5  -4    0.77    0.70 
  10   5   4    1.26    0.98 
  17  -6  -4   -0.93    0.53 
 -17   6   4   -0.46    0.83 
  16  -6  -4    1.36    0.76 
  16  -6  -4    0.39    0.51 
 -16   6   4   -0.07    0.78 
  15  -6  -4    0.74    0.65 
  15  -6  -4   -0.13    0.43 
 -15   6   4    0.07    0.77 
  14  -6  -4    0.18    0.43 
  14  -6  -4    0.89    0.64 
 -14   6   4   -0.74    0.66 
  13  -6  -4    2.16    0.71 
  13  -6  -4    0.78    0.44 
 -13   6   4    1.69    0.75 
  12  -6  -4    3.27    0.58 
  12  -6  -4    3.09    0.77 
 -12   6   4    2.99    0.85 
  11  -6  -4    1.77    0.63 
  11  -6  -4    2.26    0.48 
 -11   6   4    2.73    0.77 
  10  -6  -4    6.14    0.87 
  10  -6  -4    4.71    0.59 
 -10   6   4    5.62    0.92 
   9  -6  -4    2.03    0.58 
   9  -6  -4    1.90    0.38 
  -9   6   4    1.73    0.62 
   8  -6  -4    0.54    0.28 
   8  -6  -4    1.04    0.50 
  -8   6   4    0.77    0.55 
   7  -6  -4    3.99    0.48 
  -7   6   4    3.52    0.69 
  -7   6   4    4.44    0.73 
   6  -6  -4    2.06    0.37 
  -6   6   4    0.47    0.44 
  -6   6   4    1.36    0.52 
   5  -6  -4    0.39    0.31 
  -5   6   4    0.64    0.51 
  -5   6   4    0.77    0.44 
   4  -6  -4    6.84    0.69 
  -4   6   4    6.63    0.75 
  -4   6   4    6.97    0.87 
   3  -6  -4    5.51    0.65 
  -3   6   4    6.74    0.73 
  -3   6   4    5.52    0.77 
   2  -6  -4    1.40    0.41 
  -2   6   4    2.51    0.48 
  -2   6   4    1.39    0.55 
   1  -6  -4    6.05    0.75 
  -1   6   4    6.38    0.84 
  -1   6   4    6.00    0.69 
   0   6   4    5.82    0.75 
   0   6   4    5.08    0.65 
   0   6   4    5.07    0.77 
   1   6   4    2.19    0.61 
   1   6   4    4.59    0.61 
   1   6   4    3.87    0.70 
  -2  -6  -4    4.78    0.68 
   2   6   4    4.01    0.78 
   2   6   4    3.91    0.72 
  -3  -6  -4    6.89    0.82 
   3   6   4    5.89    0.87 
   3   6   4    4.28    0.85 
  -4  -6  -4   14.76    1.29 
   4   6   4   13.83    1.48 
   4   6   4   16.76    1.41 
  -5  -6  -4    0.76    0.52 
   5   6   4    1.32    0.67 
   5   6   4    1.27    0.58 
  -6  -6  -4    1.25    0.57 
   6   6   4    1.56    0.82 
   6   6   4    1.62    0.63 
  -7  -6  -4    0.56    0.59 
   7   6   4    1.66    0.86 
   7   6   4    0.79    0.60 
  -8  -6  -4    0.71    0.59 
   8   6   4    0.75    0.80 
   8   6   4   -0.02    0.58 
  -9  -6  -4    2.47    0.80 
   9   6   4    0.75    0.81 
 -17   7   4    0.83    0.89 
  16  -7  -4    0.64    0.74 
 -16   7   4   -0.76    0.71 
  15  -7  -4    0.53    0.65 
  15  -7  -4   -0.60    0.39 
 -15   7   4   -0.29    0.80 
  14  -7  -4    0.92    0.43 
  14  -7  -4    0.71    0.63 
 -14   7   4    0.50    0.69 
  13  -7  -4    0.14    0.35 
  13  -7  -4    0.50    0.67 
 -13   7   4    0.32    0.73 
  12  -7  -4    0.17    0.62 
  12  -7  -4    1.07    0.40 
 -12   7   4    0.65    0.65 
  11  -7  -4   -0.29    0.56 
  11  -7  -4   -0.30    0.31 
 -11   7   4   -0.30    0.53 
  10  -7  -4    0.76    0.32 
  10  -7  -4    0.60    0.57 
 -10   7   4    0.43    0.55 
   9  -7  -4    4.77    0.76 
   9  -7  -4    4.44    0.51 
  -9   7   4    3.47    0.75 
   8  -7  -4    3.34    0.74 
   8  -7  -4    4.00    0.46 
  -8   7   4    2.66    0.70 
   7  -7  -4    0.63    0.29 
  -7   7   4    0.22    0.49 
  -7   7   4    0.69    0.53 
   6  -7  -4    1.36    0.34 
  -6   7   4    1.36    0.55 
  -6   7   4    1.04    0.47 
   5  -7  -4   -0.25    0.27 
  -5   7   4    0.69    0.43 
  -5   7   4   -0.17    0.49 
   4  -7  -4    3.75    0.54 
  -4   7   4    3.96    0.74 
  -4   7   4    4.60    0.68 
   3  -7  -4    1.10    0.40 
  -3   7   4    1.46    0.45 
  -3   7   4    1.57    0.54 
   2  -7  -4    1.82    0.45 
  -2   7   4    1.46    0.47 
  -2   7   4    1.26    0.51 
   1  -7  -4    3.40    0.61 
  -1   7   4    2.10    0.57 
  -1   7   4    3.00    0.57 
   0   7   4    0.27    0.47 
   0   7   4    0.12    0.45 
   0   7   4    0.29    0.41 
   1   7   4    2.30    0.62 
   1   7   4    2.53    0.58 
   1   7   4    2.63    0.69 
  -2  -7  -4    0.49    0.43 
   2   7   4    0.37    0.52 
   2   7   4   -0.53    0.54 
  -3  -7  -4    1.16    0.49 
   3   7   4   -0.42    0.52 
   3   7   4   -0.19    0.52 
  -4  -7  -4    0.11    0.46 
   4   7   4    0.16    0.51 
   4   7   4   -0.29    0.64 
  -5  -7  -4    2.10    0.63 
   5   7   4    1.80    0.67 
   5   7   4    0.53    0.73 
  -6  -7  -4    0.82    0.58 
   6   7   4    0.14    0.76 
   6   7   4    0.46    0.59 
  -7  -7  -4   -0.35    0.55 
   7   7   4    0.15    0.59 
   7   7   4   -0.99    0.71 
  -8  -7  -4    0.48    0.63 
   8   7   4    1.22    0.98 
  17  -8  -4    3.05    0.99 
 -17   8   4    3.02    1.11 
  16  -8  -4    1.29    0.78 
 -16   8   4    1.89    0.97 
  15  -8  -4    0.27    0.71 
 -15   8   4   -0.71    0.63 
  14  -8  -4    1.04    0.73 
  14  -8  -4    2.20    0.79 
 -14   8   4    2.13    0.83 
  13  -8  -4    0.62    0.36 
  13  -8  -4    0.95    0.68 
 -13   8   4    1.12    0.70 
  12  -8  -4    3.56    0.83 
  12  -8  -4    2.49    0.48 
 -12   8   4    2.93    0.90 
  11  -8  -4    0.14    0.55 
  11  -8  -4    0.14    0.30 
 -11   8   4    0.47    0.69 
  10  -8  -4    4.65    0.53 
  10  -8  -4    5.58    0.92 
 -10   8   4    3.63    0.81 
   9  -8  -4    4.58    0.83 
   9  -8  -4    4.74    0.51 
  -9   8   4    4.71    0.88 
   8  -8  -4    1.61    0.60 
   8  -8  -4    1.65    0.36 
  -8   8   4    1.69    0.64 
   7  -8  -4    8.44    0.71 
  -7   8   4    7.67    0.98 
  -7   8   4    7.32    0.97 
   6  -8  -4    2.04    0.41 
  -6   8   4    1.78    0.58 
  -6   8   4    2.76    0.62 
   5  -8  -4    2.27    0.45 
  -5   8   4    1.99    0.57 
  -5   8   4    2.17    0.65 
   4  -8  -4   11.62    0.96 
  -4   8   4   10.08    1.16 
  -4   8   4   12.26    1.08 
   3  -8  -4   -0.30    0.30 
  -3   8   4   -0.06    0.40 
  -3   8   4    0.11    0.54 
   2  -8  -4    2.52    0.54 
  -2   8   4    2.97    0.59 
  -2   8   4    3.18    0.75 
   1  -8  -4    3.61    0.65 
  -1   8   4    4.18    0.81 
  -1   8   4    5.28    0.74 
   0   8   4    0.45    0.49 
   0   8   4   -0.67    0.50 
   0   8   4    0.22    0.53 
   1   8   4    0.98    0.60 
   1   8   4    1.02    0.64 
  -2  -8  -4   10.13    1.14 
   2   8   4   10.12    1.27 
   2   8   4   10.74    1.23 
  -3  -8  -4    1.22    0.54 
   3   8   4    0.15    0.70 
   3   8   4    1.04    0.60 
  -4  -8  -4   -0.30    0.45 
   4   8   4   -0.34    0.60 
   4   8   4    0.57    0.55 
  -5  -8  -4   -0.34    0.47 
   5   8   4   -0.35    0.53 
   5   8   4    0.61    0.81 
  -6  -8  -4   -0.65    0.50 
   6   8   4   -0.36    0.52 
   6   8   4    2.20    0.96 
  -7  -8  -4    0.48    0.59 
   7   8   4    0.29    0.78 
  17  -9  -4    0.89    0.85 
 -17   9   4   -0.47    0.70 
  16  -9  -4    1.55    0.81 
 -16   9   4    0.18    0.88 
  15  -9  -4   -0.67    0.62 
 -15   9   4   -0.10    0.79 
  14  -9  -4    2.99    0.90 
 -14   9   4    2.88    1.00 
  13  -9  -4    1.62    0.79 
 -13   9   4    2.76    0.87 
  12  -9  -4    4.20    0.91 
 -12   9   4    3.75    0.88 
  11  -9  -4    2.26    0.73 
  11  -9  -4    2.98    0.43 
 -11   9   4    2.70    0.85 
  10  -9  -4    0.36    0.63 
  10  -9  -4    0.93    0.30 
 -10   9   4    0.63    0.64 
   9  -9  -4    0.63    0.29 
   9  -9  -4    1.14    0.68 
  -9   9   4   -0.34    0.52 
   8  -9  -4    0.45    0.29 
   8  -9  -4    1.00    0.69 
  -8   9   4    0.29    0.50 
   7  -9  -4    1.84    0.43 
  -7   9   4    0.17    0.51 
  -7   9   4   -0.07    0.55 
   6  -9  -4    4.20    0.55 
  -6   9   4    4.72    0.82 
  -6   9   4    4.19    0.81 
   5  -9  -4    3.40    0.53 
  -5   9   4    1.47    0.59 
  -5   9   4    4.03    0.84 
   4  -9  -4   10.57    0.93 
  -4   9   4    8.65    1.13 
  -4   9   4    9.38    1.09 
   3  -9  -4    0.08    0.36 
  -3   9   4   -0.37    0.47 
  -3   9   4   -0.51    0.56 
   2  -9  -4    7.81    0.91 
  -2   9   4    8.37    1.10 
  -2   9   4    7.41    0.96 
   1  -9  -4    9.62    1.04 
  -1   9   4    7.26    1.09 
  -1   9   4    8.28    1.02 
   0   9   4   17.59    1.59 
   0   9   4   19.49    1.64 
   0   9   4   17.19    1.48 
  -1  -9  -4   -0.60    0.43 
   1   9   4   -1.07    0.45 
   1   9   4   -0.38    0.59 
  -2  -9  -4    0.80    0.55 
   2   9   4    0.91    0.62 
   2   9   4    1.42    0.70 
  -3  -9  -4    0.40    0.47 
   3   9   4    0.83    0.62 
   3   9   4   -0.33    0.68 
  -4  -9  -4    0.37    0.49 
   4   9   4    0.71    0.80 
   4   9   4    1.36    0.69 
  -5  -9  -4    0.07    0.55 
   5   9   4    0.51    0.68 
   5   9   4    1.03    0.83 
  -6  -9  -4    0.02    0.56 
   6   9   4   -0.85    0.75 
  17 -10  -4    0.52    0.86 
 -17  10   4    1.46    0.89 
  16 -10  -4    1.69    0.81 
 -16  10   4    0.83    0.79 
  15 -10  -4   -0.33    0.70 
 -15  10   4    1.61    0.81 
  14 -10  -4    0.91    0.72 
 -14  10   4    0.41    0.70 
  13 -10  -4    6.77    1.14 
 -13  10   4    9.24    1.37 
  12 -10  -4    5.07    1.00 
 -12  10   4    5.45    1.10 
  11 -10  -4    3.99    0.85 
 -11  10   4    4.24    0.96 
  10 -10  -4    2.60    0.86 
  10 -10  -4    2.83    0.49 
 -10  10   4    3.73    0.83 
   9 -10  -4   -0.21    0.27 
   9 -10  -4    0.40    0.67 
  -9  10   4   -0.17    0.52 
   8 -10  -4    0.42    0.30 
   8 -10  -4    0.89    0.69 
  -8  10   4    0.07    0.57 
   7 -10  -4    9.10    0.80 
  -7  10   4    8.40    1.19 
  -7  10   4    9.92    1.19 
   6 -10  -4    0.24    0.35 
  -6  10   4    0.56    0.63 
  -6  10   4   -0.05    0.53 
   5 -10  -4    2.28    0.52 
  -5  10   4    1.76    0.62 
  -5  10   4    2.02    0.74 
   4 -10  -4    1.61    0.47 
  -4  10   4    0.29    0.64 
  -4  10   4    1.81    0.68 
   3 -10  -4   14.18    1.23 
  -3  10   4   13.60    1.46 
  -3  10   4   13.35    1.27 
   2 -10  -4    0.58    0.44 
  -2  10   4    0.70    0.61 
  -2  10   4   -0.15    0.56 
   1 -10  -4    0.17    0.47 
  -1  10   4   -0.04    0.60 
  -1  10   4   -0.51    0.50 
   0  10   4    5.16    0.95 
   0  10   4    4.75    0.85 
   0  10   4    5.54    0.95 
  -1 -10  -4    2.40    0.65 
   1  10   4    2.40    0.77 
   1  10   4    2.05    0.79 
  -2 -10  -4    0.24    0.49 
   2  10   4    1.18    0.70 
   2  10   4    0.93    0.70 
  -3 -10  -4    0.38    0.48 
   3  10   4   -0.45    0.54 
   3  10   4    0.57    0.77 
  -4 -10  -4    0.46    0.54 
   4  10   4    0.49    0.86 
   4  10   4   -0.20    0.58 
  -5 -10  -4   -0.37    0.59 
   5  10   4    0.19    0.60 
   5  10   4    1.18    0.80 
  17 -11  -4    0.54    0.82 
 -17  11   4    1.21    0.87 
  16 -11  -4   -1.59    0.64 
 -16  11   4    0.31    0.84 
  15 -11  -4    0.96    0.82 
 -15  11   4    0.41    0.86 
  14 -11  -4    1.71    0.77 
 -14  11   4    1.30    0.88 
  13 -11  -4    3.77    0.99 
 -13  11   4    4.10    1.03 
  12 -11  -4    0.37    0.60 
 -12  11   4    0.32    0.64 
  11 -11  -4    3.86    0.95 
 -11  11   4    2.64    0.80 
  10 -11  -4    3.72    0.97 
 -10  11   4    5.42    0.97 
   9 -11  -4    0.62    0.70 
  -9  11   4    0.62    0.63 
   8 -11  -4    1.71    0.80 
   8 -11  -4    1.08    0.36 
  -8  11   4    2.04    0.75 
   7 -11  -4    6.32    0.72 
  -7  11   4    7.54    1.03 
  -7  11   4    8.22    1.23 
   6 -11  -4    0.22    0.39 
  -6  11   4    0.17    0.58 
  -6  11   4    2.34    0.81 
   5 -11  -4    2.78    0.53 
  -5  11   4    0.84    0.63 
  -5  11   4    3.25    0.86 
   4 -11  -4    0.80    0.46 
  -4  11   4    1.70    0.79 
  -4  11   4    1.50    0.66 
   3 -11  -4    4.41    0.74 
  -3  11   4    3.69    0.84 
  -3  11   4    2.26    0.81 
   2 -11  -4    0.40    0.47 
  -2  11   4    0.43    0.66 
  -2  11   4   -0.15    0.56 
   1 -11  -4    0.49    0.53 
  -1  11   4    1.76    0.78 
  -1  11   4    1.84    0.71 
   0  11   4    2.33    0.78 
   0  11   4    2.90    0.77 
  -1 -11  -4    0.64    0.51 
   1  11   4    0.09    0.62 
   1  11   4   -0.18    0.69 
  -2 -11  -4   -0.46    0.48 
   2  11   4   -0.66    0.59 
   2  11   4    0.07    0.71 
  -3 -11  -4   -0.27    0.47 
   3  11   4    0.99    0.72 
   3  11   4   -0.02    0.74 
   4  11   4   -0.02    0.73 
   4  11   4    0.16    0.73 
  16 -12  -4    0.81    0.90 
 -16  12   4    0.15    0.73 
  15 -12  -4    1.28    0.91 
 -15  12   4    3.13    1.08 
  14 -12  -4    0.68    0.80 
 -14  12   4    0.86    0.91 
  13 -12  -4    0.46    0.77 
 -13  12   4    0.10    0.77 
  12 -12  -4    0.86    0.81 
 -12  12   4   -1.14    0.52 
  11 -12  -4    1.32    0.75 
 -11  12   4   -0.01    0.65 
  10 -12  -4   -1.16    0.63 
 -10  12   4    0.07    0.60 
   9 -12  -4    1.68    0.83 
  -9  12   4    2.60    0.84 
   8 -12  -4    2.15    0.86 
  -8  12   4    0.71    0.68 
   7 -12  -4    0.85    0.39 
  -7  12   4    2.46    0.81 
  -7  12   4   -0.52    0.57 
   6 -12  -4    7.64    0.82 
  -6  12   4    5.05    1.07 
  -6  12   4    4.36    0.93 
   5 -12  -4    2.39    0.59 
  -5  12   4    2.98    0.83 
  -5  12   4    2.94    0.82 
   4 -12  -4    5.97    0.84 
  -4  12   4    6.25    1.11 
  -4  12   4    5.80    0.96 
   3 -12  -4    2.37    0.62 
  -3  12   4    1.51    0.72 
  -3  12   4    1.71    0.79 
   2 -12  -4    1.43    0.58 
  -2  12   4    0.99    0.68 
  -2  12   4    2.07    0.79 
   1 -12  -4    0.15    0.48 
  -1  12   4   -0.41    0.64 
  -1  12   4    1.75    0.72 
   0 -12  -4    4.79    0.88 
   0  12   4    4.15    0.91 
   0  12   4    3.57    0.98 
  -1 -12  -4    0.53    0.52 
   1  12   4    1.59    0.83 
   1  12   4    1.19    0.83 
  -2 -12  -4    3.95    0.85 
   2  12   4    3.93    0.97 
   2  12   4    5.41    1.15 
  16 -13  -4    0.89    0.86 
 -16  13   4    2.60    1.11 
  15 -13  -4    0.66    0.85 
 -15  13   4    0.22    0.80 
  14 -13  -4   -1.25    0.74 
 -14  13   4   -0.20    0.68 
  13 -13  -4   -0.02    0.80 
 -13  13   4    2.40    0.86 
  12 -13  -4    0.82    0.74 
 -12  13   4   -0.59    0.55 
  11 -13  -4    0.76    0.82 
 -11  13   4   -0.17    0.69 
  10 -13  -4   -0.99    0.68 
 -10  13   4    0.10    0.68 
   9 -13  -4    0.34    0.74 
  -9  13   4   -0.02    0.67 
   8 -13  -4    0.98    0.77 
  -8  13   4   -0.09    0.61 
   7 -13  -4   10.21    1.47 
  -7  13   4   10.39    1.32 
   6 -13  -4   13.04    1.18 
  -6  13   4   14.94    1.61 
  -6  13   4   12.72    1.61 
   5 -13  -4    2.75    0.63 
  -5  13   4    4.36    0.94 
  -5  13   4    2.93    0.90 
   4 -13  -4    3.63    0.71 
  -4  13   4    2.97    0.94 
  -4  13   4    3.33    0.93 
   3 -13  -4    1.00    0.53 
  -3  13   4    0.04    0.72 
  -3  13   4    1.67    0.81 
   2 -13  -4    2.88    0.71 
  -2  13   4    4.23    0.90 
  -2  13   4    1.62    0.83 
   1 -13  -4    0.54    0.56 
  -1  13   4   -0.27    0.62 
  -1  13   4    1.21    0.88 
   0 -13  -4   -0.10    0.57 
   0 -13  -4    0.08    0.53 
   0  13   4   -0.79    0.70 
  -1 -13  -4    0.25    0.54 
  -1 -13  -4    0.71    0.60 
   1  13   4    1.46    0.78 
  15 -14  -4    1.83    0.96 
 -15  14   4    2.16    0.99 
  14 -14  -4   -0.22    0.82 
 -14  14   4   -0.14    0.68 
  13 -14  -4    8.40    1.35 
 -13  14   4    2.90    1.02 
  12 -14  -4   -0.07    0.78 
 -12  14   4    1.60    0.86 
  11 -14  -4    0.92    0.80 
 -11  14   4    0.85    0.80 
  10 -14  -4    0.91    0.83 
 -10  14   4   -0.55    0.68 
   9 -14  -4    0.63    0.85 
  -9  14   4    0.08    0.69 
   8 -14  -4    0.56    0.83 
  -8  14   4    0.13    0.68 
   7 -14  -4    1.87    0.87 
  -7  14   4   -0.13    0.77 
  -6  14   4   -0.20    0.68 
   5 -14  -4    2.94    0.67 
  -5  14   4    3.45    0.96 
  -5  14   4    3.26    0.95 
   4 -14  -4    0.62    0.51 
  -4  14   4    1.04    0.80 
  -4  14   4   -0.39    0.73 
   3 -14  -4    0.08    0.51 
  -3  14   4    0.25    0.73 
  -3  14   4    1.65    0.88 
   2 -14  -4    0.33    0.54 
  -2  14   4   -0.23    0.78 
  -2  14   4    1.69    0.90 
   1 -14  -4    0.30    0.57 
  -1  14   4   -0.69    0.71 
  -1  14   4    0.03    0.71 
  14 -15  -4    0.91    0.94 
 -14  15   4    1.03    0.84 
  13 -15  -4    3.68    1.15 
 -13  15   4    3.16    1.04 
  12 -15  -4    0.48    0.81 
 -12  15   4    1.96    0.96 
  11 -15  -4    2.10    1.02 
 -11  15   4    0.84    0.81 
  10 -15  -4    0.24    0.86 
 -10  15   4    1.66    0.86 
   9 -15  -4    3.82    1.08 
  -9  15   4    2.91    0.93 
   8 -15  -4   -0.15    0.79 
  -8  15   4    0.17    0.78 
   7 -15  -4    2.13    0.99 
  -7  15   4    3.77    1.07 
   6 -15  -4   -0.21    0.79 
  -6  15   4    0.31    0.75 
  -5  15   4    0.66    0.84 
  -4  15   4    0.41    0.79 
  -4  15   4    0.57    0.80 
   3 -15  -4    0.01    0.50 
  -3  15   4   -0.08    0.75 
  -3  15   4   -0.33    0.77 
  12 -16  -4    3.69    1.17 
 -12  16   4    2.12    0.97 
  11 -16  -4    0.00    0.86 
 -11  16   4   -0.76    0.75 
  10 -16  -4    2.67    1.02 
 -10  16   4    2.62    0.92 
   9 -16  -4    2.39    1.04 
  -9  16   4   -1.19    0.74 
   8 -16  -4    1.46    0.97 
  -8  16   4    0.89    0.86 
   7 -16  -4    1.79    0.97 
  -7  16   4   -0.48    0.71 
   6 -16  -4    2.00    1.00 
  -6  16   4   -0.14    0.86 
  -7  19  -5   -0.03    0.71 
   7 -19   5    0.16    0.93 
  -8  19  -5   -0.38    0.67 
   8 -19   5    0.67    0.97 
  -9  19  -5    1.55    0.94 
   9 -19   5    1.91    1.15 
 -10  19  -5    2.71    1.12 
  10 -19   5    1.25    1.04 
  -3  18  -5    0.03    0.90 
   3 -18   5   -0.91    0.75 
  -4  18  -5    0.62    0.94 
   4 -18   5    0.17    0.80 
  -5  18  -5    6.67    1.38 
   5 -18   5    4.26    1.12 
  -6  18  -5   -0.16    0.74 
   6 -18   5   -0.48    0.82 
  -7  18  -5   -0.18    0.73 
   7 -18   5    0.11    0.87 
  -8  18  -5    1.90    0.91 
   8 -18   5    2.60    1.08 
  -9  18  -5   -0.62    0.77 
   9 -18   5    1.33    1.03 
 -10  18  -5   -0.54    0.65 
  10 -18   5   -0.19    0.96 
 -11  18  -5    0.45    0.77 
  11 -18   5    1.24    1.05 
 -12  18  -5   -0.32    0.62 
  12 -18   5   -0.08    0.89 
  -1  17  -5    0.63    0.67 
  -1  17  -5   -0.02    0.90 
  -2  17  -5   -0.50    0.68 
   2 -17   5   -0.01    0.75 
  -3  17  -5    0.76    0.88 
   3 -17   5   -1.85    0.64 
  -4  17  -5    1.07    0.93 
   4 -17   5    2.17    0.89 
  -5  17  -5    1.84    0.92 
   5 -17   5    0.93    0.85 
  -6  17  -5    2.16    0.89 
   6 -17   5    5.48    1.13 
  -7  17  -5    0.63    0.71 
   7 -17   5    0.81    0.85 
  -8  17  -5   -0.11    0.75 
   8 -17   5   -0.14    0.82 
  -9  17  -5    0.47    0.83 
   9 -17   5    0.12    0.84 
 -10  17  -5    1.73    0.86 
  10 -17   5    0.52    0.94 
 -11  17  -5    0.33    0.70 
  11 -17   5    1.47    0.99 
 -12  17  -5    1.59    0.92 
  12 -17   5    4.02    1.20 
 -13  17  -5    0.04    0.68 
  13 -17   5    2.59    1.14 
 -14  17  -5    0.44    0.75 
  14 -17   5   -1.08    1.02 
   1  16  -5    0.27    0.76 
  -1 -16   5    0.79    0.80 
   0  16  -5    1.53    1.02 
   0  16  -5    2.44    0.79 
  -1  16  -5    0.72    0.83 
  -1  16  -5    0.63    0.65 
   1 -16   5   -0.71    0.68 
  -2  16  -5    0.44    0.58 
  -2  16  -5   -0.60    0.81 
   2 -16   5    0.85    0.76 
  -3  16  -5    1.47    0.95 
  -3  16  -5    0.35    0.61 
   3 -16   5   -0.03    0.73 
  -4  16  -5    2.96    0.98 
   4 -16   5    3.22    0.98 
  -5  16  -5    5.67    1.20 
   5 -16   5    5.77    1.13 
  -6  16  -5    0.42    0.64 
   6 -16   5   -1.01    0.72 
  -7  16  -5    1.39    0.76 
   7 -16   5    3.92    1.08 
  -8  16  -5    0.58    0.77 
   8 -16   5    0.13    0.78 
  -9  16  -5   -0.47    0.53 
   9 -16   5    1.65    0.96 
 -10  16  -5    3.91    0.95 
  10 -16   5    3.45    1.06 
 -11  16  -5    0.11    0.75 
  11 -16   5    0.06    0.92 
 -12  16  -5    2.05    0.93 
  12 -16   5    1.08    0.93 
 -13  16  -5    0.06    0.77 
  13 -16   5   -0.40    0.94 
 -14  16  -5   -0.10    0.80 
  14 -16   5    0.12    0.99 
 -15  16  -5    0.02    0.73 
  15 -16   5    0.29    0.98 
   3  15  -5    1.30    0.85 
  -3 -15   5    0.05    0.81 
   2  15  -5    0.77    0.77 
  -2 -15   5    0.65    0.77 
   1  15  -5    1.90    0.82 
   0  15  -5    2.03    0.96 
   0  15  -5    2.07    0.76 
   0 -15   5    2.26    0.77 
  -1  15  -5    1.51    0.93 
  -1  15  -5    2.61    0.72 
   1 -15   5    2.65    0.81 
  -2  15  -5    0.63    0.55 
  -2  15  -5   -0.03    0.77 
   2 -15   5    1.87    0.79 
  -3  15  -5    1.80    0.57 
  -3  15  -5    0.46    0.79 
   3 -15   5    1.21    0.75 
  -4  15  -5    0.34    0.77 
  -4  15  -5    0.58    0.45 
   4 -15   5    0.63    0.74 
  -5  15  -5    1.14    0.69 
   5 -15   5    1.67    0.84 
  -6  15  -5    0.17    0.63 
   6 -15   5    1.11    0.82 
  -7  15  -5    0.74    0.71 
   7 -15   5    0.16    0.82 
  -8  15  -5    1.19    0.74 
   8 -15   5    1.42    0.86 
  -9  15  -5    3.12    0.87 
   9 -15   5    5.18    1.18 
 -10  15  -5    3.80    0.91 
  10 -15   5    0.10    0.86 
 -11  15  -5   -0.04    0.70 
  11 -15   5    1.77    1.02 
 -12  15  -5    1.81    0.90 
  12 -15   5    3.07    1.11 
 -13  15  -5    1.19    0.90 
  13 -15   5    0.81    0.99 
 -14  15  -5    1.22    0.85 
  14 -15   5   -0.54    0.97 
 -15  15  -5    2.43    0.98 
  15 -15   5    0.53    1.02 
   4  14  -5    1.16    0.79 
  -4 -14   5    0.10    0.78 
   3  14  -5   -0.04    0.74 
  -3 -14   5   -0.71    0.68 
   2  14  -5    0.23    0.70 
  -2 -14   5    0.90    0.81 
   1  14  -5    0.21    0.61 
   1  14  -5    1.40    0.80 
  -1 -14   5    1.54    1.10 
   0  14  -5    1.13    0.81 
   0  14  -5    1.06    0.65 
   0 -14   5    1.13    0.67 
  -1  14  -5    7.94    1.01 
  -1  14  -5    6.48    1.27 
   1 -14   5    8.93    1.12 
  -2  14  -5    0.72    0.53 
  -2  14  -5    1.91    0.82 
   2 -14   5    1.56    0.76 
  -3  14  -5    1.39    0.85 
  -3  14  -5   -0.53    0.39 
   3 -14   5    0.42    0.71 
  -4  14  -5    5.76    0.68 
  -4  14  -5    3.93    0.96 
   4 -14   5    4.84    1.00 
  -5  14  -5    0.40    0.37 
  -5  14  -5    0.53    0.62 
   5 -14   5    0.39    0.73 
  -6  14  -5    0.88    0.67 
   6 -14   5    1.06    0.78 
  -7  14  -5    1.23    0.66 
   7 -14   5    1.57    0.90 
  -8  14  -5    1.61    0.72 
   8 -14   5    0.40    0.80 
  -9  14  -5    0.23    0.61 
   9 -14   5    1.53    0.94 
 -10  14  -5    4.82    0.98 
  10 -14   5    3.27    1.01 
 -11  14  -5    1.77    0.81 
  11 -14   5    0.63    0.80 
 -12  14  -5    0.34    0.69 
  12 -14   5    0.70    0.86 
 -13  14  -5    0.86    0.76 
  13 -14   5    0.89    0.97 
 -14  14  -5   -1.23    0.50 
  14 -14   5    0.41    0.93 
 -15  14  -5    0.42    0.73 
  15 -14   5    2.37    1.18 
 -16  14  -5    1.79    0.93 
  16 -14   5    0.32    1.05 
   5  13  -5    1.52    0.79 
  -5 -13   5    0.25    0.80 
   4  13  -5    0.76    0.78 
  -4 -13   5    0.47    0.66 
   3  13  -5    0.77    0.72 
  -3 -13   5   -0.07    0.69 
   2  13  -5    1.71    0.74 
  -2 -13   5   -0.21    0.66 
   1  13  -5    0.95    0.64 
   1  13  -5   -0.49    0.73 
  -1 -13   5    0.23    0.54 
   0  13  -5    6.70    0.96 
   0  13  -5    4.80    1.05 
   0 -13   5    6.19    0.92 
  -1  13  -5   12.38    1.26 
  -1  13  -5   14.47    1.67 
   1 -13   5   12.44    1.33 
  -2  13  -5    0.02    0.68 
  -2  13  -5   -0.09    0.46 
   2 -13   5   -0.52    0.60 
  -3  13  -5   -0.35    0.62 
  -3  13  -5   -0.10    0.39 
   3 -13   5   -0.02    0.65 
  -4  13  -5    0.24    0.36 
  -4  13  -5   -0.11    0.60 
   4 -13   5    0.17    0.70 
  -5  13  -5    2.57    0.40 
  -5  13  -5    1.26    0.66 
   5 -13   5    3.25    0.91 
  -6  13  -5    3.29    0.87 
   6 -13   5    5.05    1.01 
  -7  13  -5    0.15    0.54 
   7 -13   5   -0.36    0.73 
  -8  13  -5    0.29    0.54 
   8 -13   5    1.24    0.87 
  -9  13  -5    0.28    0.54 
   9 -13   5    1.15    0.78 
 -10  13  -5    1.47    0.73 
  10 -13   5    1.96    0.88 
 -11  13  -5    0.28    0.65 
  11 -13   5   -0.13    0.85 
 -12  13  -5    0.36    0.64 
  12 -13   5    1.94    1.01 
 -13  13  -5   -0.80    0.65 
  13 -13   5    0.59    0.81 
 -14  13  -5    0.06    0.69 
  14 -13   5   -0.16    0.89 
 -15  13  -5    5.05    1.20 
  15 -13   5    3.69    1.23 
 -16  13  -5    6.84    1.35 
  16 -13   5    2.48    1.25 
   7  12  -5    0.99    0.92
[truncated: 996,345 more chars]
